# Supplementary material for: High yield derivation of enriched glutamatergic neurons from suspension-cultured mouse ESCs for neurotoxicology research
Source: PubMed Central journal article supplement (PMC3573964; doi:10.1186/1471-2202-13-127), 2012-10-24
Supplement: 1471-2202-13-127-S1.pdf [file 1471-2202-13-127-S1.pdf]

**Average RPKMs for all transcripts**

RKPM: reads per kilobase of exon per million mapped sequences

| Gene name     | Av RKPM    | SD   | CoV    |
|---------------|------------|------|--------|
| 40603         | 11.67626   | 0.48 | 4.1%   |
| 40604         | 14.62324   | 1.31 | 8.9%   |
| 40605         | 2.737656   | 0.21 | 7.8%   |
| 40606         | 8.5183     | 0.56 | 6.5%   |
| 40607         | 35.36966   | 1.28 | 3.6%   |
| 40608         | 83.4831    | 3.37 | 4.0%   |
| 40609         | 14.68758   | 0.92 | 6.2%   |
| 40610         | 10.712166  | 0.62 | 5.8%   |
| 40611         | 14.50206   | 1.03 | 7.1%   |
| 40612         | 0.06923812 | 0.02 | 23.5%  |
| 40613         | 2.908098   | 0.53 | 18.1%  |
| 40787         | 0.06023374 | 0.03 | 45.3%  |
| 40788         | 24.73104   | 1.95 | 7.9%   |
| 40789         | 117.9616   | 7.04 | 6.0%   |
| 40790         | 9.558842   | 1.79 | 18.7%  |
| 40791         | 110.3324   | 6.26 | 5.7%   |
| 40792         | 37.93056   | 2.00 | 5.3%   |
| 40793         | 85.82438   | 1.35 | 1.6%   |
| 40794         | 17.90124   | 1.01 | 5.6%   |
| 40795         | 19.03982   | 1.56 | 8.2%   |
| 40796         | 1.504728   | 0.19 | 12.4%  |
| 40797         | 36.03812   | 2.59 | 7.2%   |
| 40798         | 0          | 0.00 |        |
| 40800         | 2.392      | 0.18 | 7.6%   |
| 40801         | 71.90914   | 3.73 | 5.2%   |
| 40817         | 0.987742   | 2.19 | 221.2% |
| 0610006I08Rik | 32.01456   | 4.00 | 12.5%  |
| 0610007C21Rik | 27.3846    | 0.95 | 3.5%   |
| 0610007L01Rik | 19.01198   | 0.76 | 4.0%   |
| 0610007P08Rik | 2.648974   | 0.17 | 6.3%   |
| 0610007P14Rik | 28.26806   | 2.93 | 10.4%  |
| 0610007P22Rik | 9.939696   | 0.83 | 8.3%   |
| 0610008C08Rik | 1.1400194  | 0.30 | 26.5%  |
| 0610008F07Rik | 0          | 0.00 |        |
| 0610009B22Rik | 14.63654   | 1.13 | 7.8%   |
| 0610009D07Rik | 20.81844   | 1.30 | 6.2%   |
| 0610009K11Rik | 9.497214   | 0.34 | 3.5%   |
| 0610009O03Rik | 6.088442   | 0.85 | 13.9%  |
| 0610009O20Rik | 12.75618   | 0.23 | 1.8%   |
| 0610010D20Rik | 0.05401106 | 0.05 | 92.2%  |
| 0610010D24Rik | 0.23117952 | 0.24 | 104.8% |
| 0610010E21Rik | 5.070526   | 0.52 | 10.3%  |

|               |            |      |        |
|---------------|------------|------|--------|
| 0610010F05Rik | 20.66784   | 0.98 | 4.7%   |
| 0610010K06Rik | 0          | 0.00 |        |
| 0610010K14Rik | 9.889694   | 1.41 | 14.3%  |
| 0610010O12Rik | 19.91588   | 1.56 | 7.8%   |
| 0610011F06Rik | 8.04009    | 0.15 | 1.9%   |
| 0610011L14Rik | 9.380354   | 0.48 | 5.1%   |
| 0610012D14Rik | 0.3637354  | 0.14 | 39.1%  |
| 0610012D17Rik | 4.80818    | 0.90 | 18.7%  |
| 0610012G03Rik | 19.5748    | 1.43 | 7.3%   |
| 0610012H03Rik | 0.0047451  | 0.01 | 223.6% |
| 0610013E23Rik | 1.934256   | 0.28 | 14.7%  |
| 0610025P10Rik | 18.77406   | 0.42 | 2.2%   |
| 0610030E20Rik | 1.861344   | 0.27 | 14.7%  |
| 0610031J06Rik | 12.1006    | 0.92 | 7.6%   |
| 0610037D15Rik | 0.8553186  | 0.18 | 21.2%  |
| 0610037L13Rik | 13.5498    | 0.66 | 4.9%   |
| 0610037P05Rik | 20.44222   | 1.75 | 8.5%   |
| 0610038D11Rik | 6.131326   | 0.65 | 10.6%  |
| 0610038F07Rik | 21.1709    | 0.89 | 4.2%   |
| 0610040J01Rik | 0.2318094  | 0.02 | 9.7%   |
| 0710005I19Rik | 12.177524  | 1.47 | 12.1%  |
| 0710008K08Rik | 15.4478    | 0.49 | 3.2%   |
| 0910001A06Rik | 60.53192   | 3.34 | 5.5%   |
| 0910001L09Rik | 23.1696    | 1.04 | 4.5%   |
| 1100001E04Rik | 15.30468   | 0.86 | 5.6%   |
| 1100001G20Rik | 0          | 0.00 |        |
| 1100001H23Rik | 0.06120732 | 0.02 | 25.5%  |
| 1110001A07Rik | 7.177454   | 0.77 | 10.7%  |
| 1110001A16Rik | 6.049946   | 0.58 | 9.6%   |
| 1110001D15Rik | 0.03658288 | 0.01 | 14.8%  |
| 1110001J03Rik | 22.8624    | 1.08 | 4.7%   |
| 1110002B05Rik | 19.54778   | 0.92 | 4.7%   |
| 1110002E23Rik | 43.70396   | 2.78 | 6.4%   |
| 1110002H13Rik | 0.01619152 | 0.02 | 94.5%  |
| 1110002N22Rik | 3.10692    | 0.37 | 11.7%  |
| 1110003E01Rik | 41.88292   | 1.69 | 4.0%   |
| 1110004E09Rik | 6.723898   | 0.78 | 11.6%  |
| 1110004F10Rik | 34.26432   | 3.87 | 11.3%  |
| 1110005A03Rik | 2.26168    | 0.15 | 6.8%   |
| 1110005A23Rik | 3.816438   | 0.74 | 19.3%  |
| 1110006G06Rik | 12.433106  | 5.99 | 48.2%  |
| 1110006O17Rik | 0.03219452 | 0.02 | 69.1%  |
| 1110007A13Rik | 5.807704   | 0.22 | 3.8%   |
| 1110007C09Rik | 3.927842   | 0.68 | 17.3%  |
| 1110007L15Rik | 11.54428   | 0.68 | 5.9%   |
| 1110007M04Rik | 8.82549    | 0.85 | 9.6%   |
| 1110008F13Rik | 31.15504   | 2.39 | 7.7%   |

|               |            |      |        |
|---------------|------------|------|--------|
| 1110008I14Rik | 0          | 0.00 |        |
| 1110008J03Rik | 6.245366   | 0.63 | 10.1%  |
| 1110008L16Rik | 2.418618   | 0.13 | 5.4%   |
| 1110008P14Rik | 48.51764   | 4.77 | 9.8%   |
| 1110012D08Rik | 4.589816   | 0.23 | 4.9%   |
| 1110012J17Rik | 4.496836   | 0.17 | 3.7%   |
| 1110012L19Rik | 6.918752   | 0.45 | 6.5%   |
| 1110012M11Rik | 9.201792   | 0.68 | 7.4%   |
| 1110012N22Rik | 0.1772018  | 0.05 | 27.2%  |
| 1110013L07Rik | 15.05462   | 0.43 | 2.9%   |
| 1110014J01Rik | 7.06459    | 0.56 | 7.9%   |
| 1110014K08Rik | 1.678074   | 0.17 | 10.3%  |
| 1110014N23Rik | 21.93458   | 1.22 | 5.6%   |
| 1110015M06Rik | 0          | 0.00 |        |
| 1110017D15Rik | 0.3522858  | 0.09 | 26.6%  |
| 1110017I16Rik | 0.02260084 | 0.03 | 142.0% |
| 1110018G07Rik | 22.45992   | 1.31 | 5.9%   |
| 1110018H23Rik | 0          | 0.00 |        |
| 1110018J18Rik | 3.357416   | 0.66 | 19.7%  |
| 1110018J23Rik | 0.1500428  | 0.03 | 22.3%  |
| 1110018M03Rik | 0.6893744  | 0.14 | 20.5%  |
| 1110019J04Rik | 15.27464   | 1.89 | 12.4%  |
| 1110019K23Rik | 5.63765    | 0.28 | 4.9%   |
| 1110019N10Rik | 12.46444   | 1.04 | 8.4%   |
| 1110020C03Rik | 0.08147936 | 0.05 | 57.4%  |
| 1110020G09Rik | 7.24562    | 0.36 | 4.9%   |
| 1110020P15Rik | 79.82052   | 5.30 | 6.6%   |
| 1110021J02Rik | 7.944344   | 1.24 | 15.6%  |
| 1110028A07Rik | 0.02034882 | 0.02 | 94.3%  |
| 1110028C15Rik | 2.111648   | 0.27 | 12.9%  |
| 1110029E03Rik | 6.447544   | 0.38 | 5.9%   |
| 1110031B06Rik | 188.6826   | 2.94 | 1.6%   |
| 1110031I02Rik | 4.640134   | 0.13 | 2.8%   |
| 1110032A03Rik | 11.06716   | 0.78 | 7.1%   |
| 1110032A04Rik | 3.847072   | 0.41 | 10.6%  |
| 1110032A13Rik | 12.29006   | 1.01 | 8.2%   |
| 1110032E23Rik | 1.94055    | 0.21 | 10.7%  |
| 1110032O16Rik | 7.362976   | 1.01 | 13.7%  |
| 1110033F04Rik | 0          | 0.00 |        |
| 1110033J19Rik | 15.65934   | 2.16 | 13.8%  |
| 1110033M05Rik | 9.875628   | 0.52 | 5.3%   |
| 1110034A24Rik | 1.319254   | 0.17 | 12.9%  |
| 1110034B05Rik | 5.428918   | 0.40 | 7.4%   |
| 1110034G24Rik | 3.522136   | 0.20 | 5.6%   |
| 1110036O03Rik | 3.62982    | 0.27 | 7.5%   |
| 1110037F02Rik | 8.642296   | 0.40 | 4.6%   |
| 1110038D17Rik | 5.337024   | 0.61 | 11.5%  |

|               |             |      |        |
|---------------|-------------|------|--------|
| 1110038F14Rik | 6.605574    | 0.63 | 9.5%   |
| 1110039B18Rik | 20.06066    | 0.53 | 2.7%   |
| 1110049B09Rik | 0.04198018  | 0.04 | 89.7%  |
| 1110049F12Rik | 45.05524    | 2.60 | 5.8%   |
| 1110051B16Rik | 0           | 0.00 |        |
| 1110051M20Rik | 19.9846     | 4.29 | 21.5%  |
| 1110054O05Rik | 3.94987     | 0.19 | 4.9%   |
| 1110054P19Rik | 0           | 0.00 |        |
| 1110057K04Rik | 12.68052    | 0.38 | 3.0%   |
| 1110058L19Rik | 8.835994    | 0.37 | 4.1%   |
| 1110059E24Rik | 15.43236    | 0.75 | 4.8%   |
| 1110059G10Rik | 1.962244    | 0.18 | 9.2%   |
| 1110059H15Rik | 2.3429852   | 1.61 | 68.7%  |
| 1110061O04Rik | 0.1934406   | 0.07 | 37.1%  |
| 1110064P04Rik | 1.0300064   | 0.61 | 59.5%  |
| 1110067D22Rik | 31.48432    | 1.82 | 5.8%   |
| 1110067I12Rik | 1.537228    | 0.18 | 12.0%  |
| 1190002A17Rik | 0.7582484   | 0.18 | 23.9%  |
| 1190002H23Rik | 0.2379762   | 0.08 | 32.5%  |
| 1190002N15Rik | 5.956218    | 0.20 | 3.3%   |
| 1190003J15Rik | 0.0154409   | 0.02 | 140.8% |
| 1190003M12Rik | 0.12587772  | 0.06 | 44.4%  |
| 1190005F20Rik | 7.57087     | 0.35 | 4.7%   |
| 1190005I06Rik | 1.4194672   | 0.41 | 28.9%  |
| 1190005P17Rik | 2.575862    | 0.27 | 10.4%  |
| 1190017O12Rik | 5.843518    | 0.43 | 7.4%   |
| 1190020J12Rik | 0.2949146   | 0.08 | 27.0%  |
| 1200002N14Rik | 0.6087352   | 0.23 | 38.0%  |
| 1200003C05Rik | 29.28896    | 1.89 | 6.5%   |
| 1200003I07Rik | 7.087236    | 0.13 | 1.9%   |
| 1200004M23Rik | 2.902572    | 0.23 | 7.9%   |
| 1200009F10Rik | 7.860752    | 0.69 | 8.8%   |
| 1200009I06Rik | 0.1615962   | 0.02 | 12.5%  |
| 1200009O22Rik | 5.552574    | 0.53 | 9.6%   |
| 1200011I18Rik | 8.365534    | 0.30 | 3.6%   |
| 1200011M11Rik | 6.43495     | 0.31 | 4.9%   |
| 1200011O22Rik | 3.092196    | 0.21 | 6.9%   |
| 1200013B08Rik | 0.004136656 | 0.01 | 137.4% |
| 1200013P24Rik | 41.40306    | 2.09 | 5.0%   |
| 1200014J11Rik | 5.719202    | 0.24 | 4.1%   |
| 1200014M14Rik | 12.43544    | 0.24 | 1.9%   |
| 1200015A19Rik | 37.7796     | 1.40 | 3.7%   |
| 1200015F23Rik | 17.69728    | 0.85 | 4.8%   |
| 1200015N20Rik | 6.263466    | 0.48 | 7.6%   |
| 1200016B10Rik | 1.306862    | 0.09 | 6.7%   |
| 1300001I01Rik | 32.31458    | 0.76 | 2.3%   |
| 1300002K09Rik | 0.01484772  | 0.01 | 92.3%  |

|               |             |      |        |
|---------------|-------------|------|--------|
| 1300003B13Rik | 7.442572    | 0.43 | 5.7%   |
| 1300007F04Rik | 0.05440566  | 0.03 | 57.6%  |
| 1300010F03Rik | 13.10772    | 0.78 | 5.9%   |
| 1300010M03Rik | 18.43024    | 0.58 | 3.2%   |
| 1300012G16Rik | 17.07374    | 1.40 | 8.2%   |
| 1300014I06Rik | 2.900172    | 0.17 | 5.7%   |
| 1300017J02Rik | 0.02417306  | 0.02 | 64.4%  |
| 1300018I05Rik | 23.66636    | 1.10 | 4.6%   |
| 1300018I17Rik | 15.30768    | 0.32 | 2.1%   |
| 1300018J18Rik | 8.113044    | 0.24 | 2.9%   |
| 1500001A10Rik | 5.973948    | 0.50 | 8.4%   |
| 1500001M20Rik | 4.194662    | 0.29 | 6.8%   |
| 1500002O20Rik | 4.65949     | 0.49 | 10.5%  |
| 1500003O03Rik | 26.5808     | 1.27 | 4.8%   |
| 1500003O22Rik | 4.897882    | 0.34 | 6.9%   |
| 1500005A01Rik | 8.706684    | 0.59 | 6.8%   |
| 1500005I02Rik | 0.9168604   | 0.06 | 6.1%   |
| 1500010J02Rik | 11.509      | 0.89 | 7.7%   |
| 1500011B03Rik | 57.1211     | 2.50 | 4.4%   |
| 1500011H22Rik | 29.67984    | 2.14 | 7.2%   |
| 1500012F01Rik | 11.75096    | 0.92 | 7.8%   |
| 1500015O10Rik | 3.274808    | 0.88 | 27.0%  |
| 1500016O10Rik | 0.12042764  | 0.05 | 44.8%  |
| 1500019G21Rik | 34.9358     | 2.07 | 5.9%   |
| 1500031I19Rik | 77.65288    | 6.03 | 7.8%   |
| 1500031L02Rik | 12.95436    | 0.49 | 3.7%   |
| 1500032D16Rik | 79.7215     | 3.86 | 4.8%   |
| 1500032L24Rik | 89.31526    | 8.07 | 9.0%   |
| 1500034J01Rik | 36.01696    | 3.60 | 10.0%  |
| 1500035H01Rik | 11.66006    | 0.33 | 2.9%   |
| 1500041B16Rik | 18.05466    | 2.36 | 13.0%  |
| 1500041N16Rik | 7.097336    | 0.22 | 3.0%   |
| 1520401A03Rik | 0.016259634 | 0.01 | 49.1%  |
| 1600002H07Rik | 2.103546    | 0.88 | 41.9%  |
| 1600002K03Rik | 1.849022    | 0.20 | 10.6%  |
| 1600002O04Rik | 5.170354    | 0.24 | 4.6%   |
| 1600012F09Rik | 1.87956     | 0.37 | 19.4%  |
| 1600012H06Rik | 9.921056    | 2.45 | 24.7%  |
| 1600012P17Rik | 0           | 0.00 |        |
| 1600014C10Rik | 12.69996    | 0.24 | 1.9%   |
| 1600014C23Rik | 0.04102774  | 0.07 | 166.6% |
| 1600014E20Rik | 0.00415768  | 0.01 | 223.6% |
| 1600014K23Rik | 0           | 0.00 |        |
| 1600015H20Rik | 0.3262128   | 0.11 | 35.2%  |
| 1600015I10Rik | 0           | 0.00 |        |
| 1600016N20Rik | 0.10771272  | 0.05 | 42.2%  |
| 1600021P15Rik | 20.96076    | 2.01 | 9.6%   |

|               |            |      |        |
|---------------|------------|------|--------|
| 1600027N09Rik | 3.12152    | 0.36 | 11.5%  |
| 1600029D21Rik | 0.04316328 | 0.03 | 67.4%  |
| 1600029I14Rik | 0          | 0.00 |        |
| 1700001C02Rik | 0          | 0.00 |        |
| 1700001C19Rik | 0.05964266 | 0.02 | 37.5%  |
| 1700001F09Rik | 0.0123066  | 0.02 | 137.6% |
| 1700001G17Rik | 0.1585662  | 0.08 | 52.9%  |
| 1700001J03Rik | 0.01658234 | 0.02 | 140.6% |
| 1700001K19Rik | 0.206083   | 0.07 | 32.2%  |
| 1700001L19Rik | 1.2215938  | 0.24 | 19.7%  |
| 1700001O22Rik | 0.07041344 | 0.07 | 101.2% |
| 1700001P01Rik | 0.02479292 | 0.04 | 152.9% |
| 1700003E16Rik | 2.5264     | 0.25 | 9.8%   |
| 1700003F12Rik | 0.04388062 | 0.03 | 77.3%  |
| 1700003M02Rik | 0.07189868 | 0.03 | 42.3%  |
| 1700006A11Rik | 0          | 0.00 |        |
| 1700006E09Rik | 0.02594286 | 0.04 | 142.3% |
| 1700007B13Rik | 0          | 0.00 |        |
| 1700007B14Rik | 0.01808648 | 0.02 | 94.9%  |
| 1700007G11Rik | 0.05097332 | 0.06 | 113.7% |
| 1700007I06Rik | 0.10786298 | 0.06 | 56.3%  |
| 1700007K09Rik | 0.0753224  | 0.03 | 33.7%  |
| 1700007K13Rik | 2.546446   | 0.43 | 17.0%  |
| 1700007N14Rik | 0          | 0.00 |        |
| 1700008A04Rik | 0          | 0.00 |        |
| 1700008F21Rik | 0.01075238 | 0.01 | 137.0% |
| 1700008G05Rik | 0          | 0.00 |        |
| 1700008I05Rik | 0.00380754 | 0.01 | 223.6% |
| 1700008P02Rik | 0          | 0.00 |        |
| 1700008P20Rik | 0.16188416 | 0.08 | 51.1%  |
| 1700009J07Rik | 0.00742776 | 0.02 | 223.6% |
| 1700009N14Rik | 0          | 0.00 |        |
| 1700009P17Rik | 0.09097164 | 0.05 | 50.0%  |
| 1700010A17Rik | 0.3116392  | 0.11 | 35.0%  |
| 1700010C24Rik | 5.946768   | 0.62 | 10.4%  |
| 1700010D01Rik | 0          | 0.00 |        |
| 1700010H22Rik | 0          | 0.00 |        |
| 1700010I14Rik | 0.1888154  | 0.04 | 23.0%  |
| 1700010M22Rik | 0          | 0.00 |        |
| 1700011A15Rik | 0.00532488 | 0.01 | 223.6% |
| 1700011E24Rik | 0.02029968 | 0.03 | 147.6% |
| 1700011F03Rik | 0          | 0.00 |        |
| 1700011F14Rik | 0          | 0.00 |        |
| 1700011H14Rik | 0.0047332  | 0.01 | 223.6% |
| 1700011I03Rik | 0          | 0.00 |        |
| 1700011L22Rik | 0.0045537  | 0.01 | 223.6% |
| 1700012A03Rik | 0          | 0.00 |        |

|               |             |      |        |
|---------------|-------------|------|--------|
| 1700012A16Rik | 0.08500926  | 0.02 | 17.8%  |
| 1700012B07Rik | 0           | 0.00 |        |
| 1700012B09Rik | 0           | 0.00 |        |
| 1700012B15Rik | 9.703002    | 0.39 | 4.1%   |
| 1700012G19Rik | 24.46534    | 2.20 | 9.0%   |
| 1700012H17Rik | 13.44892    | 0.42 | 3.2%   |
| 1700012L04Rik | 0           | 0.00 |        |
| 1700012P22Rik | 0.01776576  | 0.02 | 139.2% |
| 1700013B16Rik | 0.004544204 | 0.01 | 158.9% |
| 1700013D24Rik | 0           | 0.00 |        |
| 1700013E18Rik | 0.9264202   | 0.09 | 9.8%   |
| 1700013F07Rik | 0.222369    | 0.09 | 42.5%  |
| 1700013G24Rik | 0           | 0.00 |        |
| 1700013H16Rik | 0           | 0.00 |        |
| 1700013N18Rik | 0.02328834  | 0.04 | 171.5% |
| 1700014N06Rik | 0           | 0.00 |        |
| 1700015E13Rik | 0.00740286  | 0.02 | 223.6% |
| 1700016C15Rik | 0           | 0.00 |        |
| 1700016D06Rik | 0           | 0.00 |        |
| 1700016G05Rik | 0           | 0.00 |        |
| 1700016H13Rik | 0.00512942  | 0.01 | 223.6% |
| 1700016K19Rik | 0.11558846  | 0.07 | 58.4%  |
| 1700016M24Rik | 0.004610418 | 0.01 | 144.1% |
| 1700017N19Rik | 0           | 0.00 |        |
| 1700018B08Rik | 0           | 0.00 |        |
| 1700018B24Rik | 0           | 0.00 |        |
| 1700018C11Rik | 0.02218894  | 0.02 | 91.9%  |
| 1700018F24Rik | 0           | 0.00 |        |
| 1700018L24Rik | 0           | 0.00 |        |
| 1700019A02Rik | 0           | 0.00 |        |
| 1700019B03Rik | 0.04855604  | 0.05 | 97.3%  |
| 1700019D03Rik | 2.296648    | 0.55 | 24.1%  |
| 1700019E19Rik | 2.635594    | 0.39 | 14.8%  |
| 1700019G17Rik | 0.7556788   | 0.04 | 5.0%   |
| 1700019H03Rik | 0.04853276  | 0.02 | 37.3%  |
| 1700019L03Rik | 0.10672498  | 0.02 | 21.2%  |
| 1700019M22Rik | 0           | 0.00 |        |
| 1700019N12Rik | 1.460211    | 0.41 | 28.4%  |
| 1700019N19Rik | 0           | 0.00 |        |
| 1700019O17Rik | 0.00295684  | 0.01 | 223.6% |
| 1700019P01Rik | 0.04766142  | 0.02 | 35.3%  |
| 1700020A23Rik | 0.0315071   | 0.03 | 103.1% |
| 1700020C07Rik | 0.00582872  | 0.01 | 223.6% |
| 1700020C11Rik | 18.02438    | 0.94 | 5.2%   |
| 1700020D05Rik | 0.3861852   | 0.11 | 29.0%  |
| 1700020L24Rik | 0.2880794   | 0.11 | 38.4%  |
| 1700020N01Rik | 0           | 0.00 |        |

|               |            |      |        |
|---------------|------------|------|--------|
| 1700020003Rik | 8.762996   | 0.60 | 6.8%   |
| 1700021C14Rik | 1.2264722  | 0.32 | 26.2%  |
| 1700021F05Rik | 14.38508   | 1.07 | 7.5%   |
| 1700021F07Rik | 0          | 0.00 |        |
| 1700021K02Rik | 0          | 0.00 |        |
| 1700021K14Rik | 0.03876596 | 0.04 | 102.3% |
| 1700021K19Rik | 13.87452   | 0.66 | 4.7%   |
| 1700021P22Rik | 2.452546   | 0.64 | 26.0%  |
| 1700022C21Rik | 1.0673998  | 0.19 | 17.7%  |
| 1700022I11Rik | 0.03110418 | 0.01 | 44.3%  |
| 1700023A16Rik | 0.00850266 | 0.01 | 140.8% |
| 1700023B02Rik | 0.7878604  | 0.17 | 21.4%  |
| 1700023D19Rik | 0          | 0.00 |        |
| 1700023E05Rik | 0          | 0.00 |        |
| 1700023F06Rik | 1.0975198  | 0.18 | 16.0%  |
| 1700023I07Rik | 0          | 0.00 |        |
| 1700024G10Rik | 0.01265578 | 0.03 | 223.6% |
| 1700024G13Rik | 0          | 0.00 |        |
| 1700025D03Rik | 0          | 0.00 |        |
| 1700025E21Rik | 0.08389366 | 0.04 | 52.7%  |
| 1700025F22Rik | 0          | 0.00 |        |
| 1700025G04Rik | 16.64606   | 0.36 | 2.2%   |
| 1700025K23Rik | 7.076718   | 0.42 | 5.9%   |
| 1700026D08Rik | 0.04952476 | 0.04 | 74.9%  |
| 1700026J04Rik | 0          | 0.00 |        |
| 1700026L06Rik | 0.15719914 | 0.06 | 37.7%  |
| 1700027A23Rik | 0          | 0.00 |        |
| 1700027D21Rik | 0.05426204 | 0.03 | 59.7%  |
| 1700027J05Rik | 12.85314   | 0.97 | 7.6%   |
| 1700027N10Rik | 1.47937    | 0.23 | 15.7%  |
| 1700028J19Rik | 0.05815212 | 0.05 | 80.3%  |
| 1700028K03Rik | 0.7143768  | 0.32 | 44.3%  |
| 1700028P14Rik | 0.02152342 | 0.02 | 94.5%  |
| 1700029F09Rik | 1.666298   | 0.20 | 12.1%  |
| 1700029F12Rik | 0.0054322  | 0.01 | 223.6% |
| 1700029G01Rik | 0.2535394  | 0.03 | 11.5%  |
| 1700029H14Rik | 0          | 0.00 |        |
| 1700029I01Rik | 0.10932338 | 0.06 | 54.6%  |
| 1700029I08Rik | 0.0111053  | 0.02 | 223.6% |
| 1700029I15Rik | 0.276439   | 0.16 | 57.3%  |
| 1700029J07Rik | 1.255382   | 0.20 | 15.9%  |
| 1700029J11Rik | 0.01941042 | 0.04 | 223.6% |
| 1700029P11Rik | 0          | 0.00 |        |
| 1700030B21Rik | 0          | 0.00 |        |
| 1700030E15Rik | 0          | 0.00 |        |
| 1700030F18Rik | 0.00855126 | 0.02 | 223.6% |
| 1700030J22Rik | 2.13829    | 0.22 | 10.4%  |



|                |            |      |        |
|----------------|------------|------|--------|
| 1700030K09Rik  | 3.323538   | 1.49 | 44.7%  |
| 1700031F05Rik  | 0          | 0.00 |        |
| 1700034E13Rik  | 0          | 0.00 |        |
| 1700034H14Rik  | 2.47369    | 0.37 | 15.1%  |
| 1700034I23Rik  | 0.01405218 | 0.02 | 154.6% |
| 1700034J05Rik  | 0          | 0.00 |        |
| 1700034K16Rik  | 0.00956222 | 0.02 | 223.6% |
| 1700034M03Rik  | 0.80957    | 0.50 | 61.8%  |
| 1700034O15Rik  | 0          | 0.00 |        |
| 1700036D21Rik  | 0.003929   | 0.01 | 223.6% |
| 1700037C18Rik  | 1.610922   | 0.20 | 12.5%  |
| 1700037H04Rik  | 42.32502   | 2.52 | 5.9%   |
| 1700039E15Rik  | 0          | 0.00 |        |
| 1700040I03Rik  | 6.63056    | 1.08 | 16.2%  |
| 1700040L02Rik  | 0.07826098 | 0.05 | 60.5%  |
| 1700041B01Rik  | 0.05050168 | 0.01 | 25.0%  |
| 1700041B20Rik  | 0.6037264  | 0.08 | 13.4%  |
| 1700041C02Rik  | 2.716632   | 0.26 | 9.4%   |
| 1700041E20Rik  | 0          | 0.00 |        |
| 1700042B14Rik  | 0          | 0.00 |        |
| 1700042G07Rik  | 0          | 0.00 |        |
| 1700045I19Rik  | 0.05574    | 0.02 | 33.2%  |
| 1700047I17Rik1 | 0.00273734 | 0.01 | 223.6% |
| 1700049E17Rik  | 0.01555928 | 0.02 | 158.8% |
| 1700049G17Rik  | 1.684096   | 0.20 | 11.8%  |
| 1700049K14Rik  | 0.00563442 | 0.01 | 223.6% |
| 1700049L16Rik  | 0.04025624 | 0.05 | 127.4% |
| 1700052K11Rik  | 2.064166   | 0.38 | 18.2%  |
| 1700052N19Rik  | 3.745462   | 0.16 | 4.2%   |
| 1700054N08Rik  | 1.773292   | 0.17 | 9.4%   |
| 1700054O13Rik  | 0          | 0.00 |        |
| 1700055M20Rik  | 0          | 0.00 |        |
| 1700055N04Rik  | 0.00490687 | 0.01 | 133.0% |
| 1700057G04Rik  | 0.00685674 | 0.02 | 223.6% |
| 1700057K13Rik  | 0          | 0.00 |        |
| 1700058C13Rik  | 0          | 0.00 |        |
| 1700060E18Rik  | 0          | 0.00 |        |
| 1700060H10Rik  | 0.7644568  | 0.14 | 18.4%  |
| 1700061G19Rik  | 0.03368066 | 0.02 | 57.3%  |
| 1700061J05Rik  | 0.00459216 | 0.01 | 223.6% |
| 1700063I17Rik  | 0.0271447  | 0.04 | 137.4% |
| 1700065D16Rik  | 0.12931524 | 0.05 | 40.7%  |
| 1700065I17Rik  | 0          | 0.00 |        |
| 1700065O13Rik  | 7.84198    | 0.26 | 3.4%   |
| 1700066B19Rik  | 0.0386092  | 0.03 | 83.3%  |
| 1700067C01Rik  | 0.02674292 | 0.02 | 57.5%  |
| 1700067K01Rik  | 0.03947428 | 0.03 | 88.3%  |

|               |            |      |        |
|---------------|------------|------|--------|
| 1700067P10Rik | 0          | 0.00 |        |
| 1700071K01Rik | 0.3552984  | 0.09 | 25.7%  |
| 1700072E05Rik | 0.00753014 | 0.02 | 223.6% |
| 1700073E17Rik | 0.00999354 | 0.01 | 137.1% |
| 1700074P13Rik | 0          | 0.00 |        |
| 1700080E11Rik | 0          | 0.00 |        |
| 1700080O16Rik | 0          | 0.00 |        |
| 1700081D17Rik | 0          | 0.00 |        |
| 1700081L11Rik | 17.84384   | 0.16 | 0.9%   |
| 1700084C01Rik | 0.593358   | 0.15 | 25.2%  |
| 1700088E04Rik | 1.1394994  | 0.20 | 17.9%  |
| 1700090G07Rik | 0          | 0.00 |        |
| 1700093K21Rik | 0.04475124 | 0.02 | 45.0%  |
| 1700094C09Rik | 0          | 0.00 |        |
| 1700094D03Rik | 1.509422   | 0.29 | 19.4%  |
| 1700101E01Rik | 0.15407126 | 0.08 | 53.9%  |
| 1700102P08Rik | 0.2444784  | 0.09 | 35.1%  |
| 1700106N22Rik | 4.408006   | 0.34 | 7.7%   |
| 1700108L22Rik | 0.12695746 | 0.06 | 44.9%  |
| 1700108M19Rik | 0          | 0.00 |        |
| 1700109F18Rik | 1.1006314  | 0.22 | 19.9%  |
| 1700109H08Rik | 4.36390922 | 8.06 | 184.6% |
| 1700110M21Rik | 0.00273176 | 0.01 | 223.6% |
| 1700112C13Rik | 0          | 0.00 |        |
| 1700113H08Rik | 0          | 0.00 |        |
| 1700113I22Rik | 2.30183    | 0.80 | 34.8%  |
| 1700113O17Rik | 0          | 0.00 |        |
| 1700120B06Rik | 0.04510334 | 0.02 | 47.4%  |
| 1700120K04Rik | 0.0607263  | 0.05 | 79.7%  |
| 1700123I01Rik | 0.05233834 | 0.03 | 60.5%  |
| 1700123K08Rik | 0.13285488 | 0.06 | 45.7%  |
| 1700123L14Rik | 0          | 0.00 |        |
| 1700123O20Rik | 4.72378    | 0.24 | 5.0%   |
| 1700124K17Rik | 4.20363    | 0.54 | 12.8%  |
| 1700125D06Rik | 0          | 0.00 |        |
| 1700125F08Rik | 0          | 0.00 |        |
| 1700126L10Rik | 0.05917618 | 0.03 | 54.9%  |
| 1700127D06Rik | 0          | 0.00 |        |
| 1700129C05Rik | 0          | 0.00 |        |
| 1700129I04Rik | 2.021242   | 0.57 | 28.0%  |
| 1700129I15Rik | 0          | 0.00 |        |
| 1810006K21Rik | 0.8269932  | 0.37 | 44.3%  |
| 1810007E14Rik | 0.052133   | 0.07 | 139.6% |
| 1810007P19Rik | 8.522686   | 0.65 | 7.7%   |
| 1810008A18Rik | 8.989052   | 0.81 | 9.0%   |
| 1810008K16Rik | 0          | 0.00 |        |
| 1810009A15Rik | 7.642894   | 0.66 | 8.6%   |

|               |            |      |        |
|---------------|------------|------|--------|
| 1810009J06Rik | 0          | 0.00 |        |
| 1810009O10Rik | 6.909064   | 0.65 | 9.5%   |
| 1810010H24Rik | 1.63908    | 0.09 | 5.7%   |
| 1810010M01Rik | 0.13706234 | 0.04 | 27.0%  |
| 1810011O10Rik | 0.2862558  | 0.07 | 25.5%  |
| 1810012P15Rik | 8.220818   | 0.40 | 4.8%   |
| 1810013D10Rik | 9.292      | 0.40 | 4.3%   |
| 1810013L24Rik | 17.79084   | 0.58 | 3.3%   |
| 1810014F10Rik | 8.841006   | 0.90 | 10.2%  |
| 1810015A11Rik | 10.933118  | 1.23 | 11.3%  |
| 1810015C04Rik | 27.4093    | 1.23 | 4.5%   |
| 1810019J16Rik | 0.0946196  | 0.03 | 34.3%  |
| 1810020D17Rik | 9.784104   | 0.95 | 9.7%   |
| 1810020G14Rik | 2.912408   | 1.86 | 64.0%  |
| 1810021J13Rik | 7.26497    | 0.77 | 10.6%  |
| 1810022C23Rik | 0.04937958 | 0.02 | 48.6%  |
| 1810022K09Rik | 6.025182   | 0.85 | 14.1%  |
| 1810023F06Rik | 0.0073401  | 0.02 | 223.6% |
| 1810024B03Rik | 0.2744652  | 0.09 | 33.6%  |
| 1810026J23Rik | 19.26538   | 1.32 | 6.9%   |
| 1810027O10Rik | 35.3478    | 4.49 | 12.7%  |
| 1810029B16Rik | 1.811364   | 0.12 | 6.8%   |
| 1810030J14Rik | 0          | 0.00 |        |
| 1810030N24Rik | 11.8835    | 1.26 | 10.6%  |
| 1810030O07Rik | 4.935262   | 0.23 | 4.6%   |
| 1810031K17Rik | 11.49636   | 0.34 | 2.9%   |
| 1810032O08Rik | 3.892648   | 0.42 | 10.7%  |
| 1810033B17Rik | 0.03805494 | 0.04 | 110.4% |
| 1810033M07Rik | 0          | 0.00 |        |
| 1810034K20Rik | 14.21102   | 1.32 | 9.3%   |
| 1810035L17Rik | 24.79344   | 3.31 | 13.4%  |
| 1810037C20Rik | 5.318714   | 0.27 | 5.1%   |
| 1810037I17Rik | 14.11216   | 1.17 | 8.3%   |
| 1810041L15Rik | 2.132184   | 0.19 | 9.0%   |
| 1810043G02Rik | 9.250634   | 0.26 | 2.8%   |
| 1810044A24Rik | 44.19322   | 0.65 | 1.5%   |
| 1810046J19Rik | 49.89846   | 5.39 | 10.8%  |
| 1810046K07Rik | 0.02108434 | 0.04 | 171.3% |
| 1810047C23Rik | 16.05588   | 0.39 | 2.4%   |
| 1810048J11Rik | 11.04032   | 0.38 | 3.5%   |
| 1810049H13Rik | 3.331274   | 0.14 | 4.1%   |
| 1810049H19Rik | 0.01586694 | 0.02 | 138.1% |
| 1810054D07Rik | 6.358472   | 0.96 | 15.2%  |
| 1810055E12Rik | 19.35662   | 0.77 | 4.0%   |
| 1810055G02Rik | 9.60898    | 0.70 | 7.2%   |
| 1810059G22Rik | 4.170754   | 0.94 | 22.6%  |
| 1810063B05Rik | 7.164702   | 0.31 | 4.3%   |

|               |            |      |        |
|---------------|------------|------|--------|
| 1810063B07Rik | 1.58924    | 0.34 | 21.4%  |
| 1810064F22Rik | 0.00401226 | 0.01 | 223.6% |
| 1810065E05Rik | 0          | 0.00 |        |
| 1810073G14Rik | 8.86225    | 0.34 | 3.9%   |
| 1810073H04Rik | 0.00249634 | 0.01 | 223.6% |
| 1810073N04Rik | 23.33026   | 2.26 | 9.7%   |
| 1810074P20Rik | 9.227656   | 0.20 | 2.2%   |
| 2010001E11Rik | 0.0062553  | 0.01 | 223.6% |
| 2010001J22Rik | 0.03731584 | 0.02 | 50.6%  |
| 2010001M09Rik | 0.02095106 | 0.02 | 94.7%  |
| 2010002M12Rik | 0.1097964  | 0.04 | 34.8%  |
| 2010002N04Rik | 0.4255792  | 0.13 | 31.7%  |
| 2010003H20Rik | 0.1403256  | 0.02 | 16.9%  |
| 2010003J03Rik | 12.11706   | 0.56 | 4.7%   |
| 2010003K11Rik | 0.00884186 | 0.01 | 137.8% |
| 2010003O18Rik | 12.9122    | 0.88 | 6.8%   |
| 2010004A03Rik | 0.2357138  | 0.07 | 29.6%  |
| 2010005H15Rik | 0          | 0.00 |        |
| 2010005J08Rik | 12.7469    | 0.64 | 5.0%   |
| 2010007H12Rik | 6.446368   | 0.31 | 4.8%   |
| 2010011I20Rik | 5.261668   | 0.37 | 7.1%   |
| 2010012C16Rik | 1.1506278  | 0.31 | 27.2%  |
| 2010012O05Rik | 13.52666   | 0.94 | 6.9%   |
| 2010015L04Rik | 1.090554   | 0.10 | 9.1%   |
| 2010100O12Rik | 31.255     | 4.36 | 14.0%  |
| 2010106E10Rik | 0.0274055  | 0.04 | 139.4% |
| 2010106G01Rik | 6.241354   | 0.50 | 7.9%   |
| 2010107E04Rik | 128.37     | 9.43 | 7.3%   |
| 2010107G12Rik | 0.06403728 | 0.04 | 60.5%  |
| 2010107G23Rik | 7.447352   | 0.83 | 11.2%  |
| 2010107H07Rik | 4.855334   | 0.57 | 11.8%  |
| 2010109I03Rik | 0          | 0.00 |        |
| 2010109K11Rik | 2.00493    | 0.26 | 13.2%  |
| 2010110K16Rik | 11.34106   | 0.52 | 4.6%   |
| 2010110P09Rik | 0.00582618 | 0.01 | 223.6% |
| 2010111I01Rik | 2.843388   | 0.88 | 30.9%  |
| 2010200O16Rik | 14.75354   | 0.45 | 3.1%   |
| 2010203O07Rik | 2.158038   | 0.22 | 10.2%  |
| 2010204N08Rik | 0.03026394 | 0.02 | 52.4%  |
| 2010208K18Rik | 9.609952   | 0.52 | 5.4%   |
| 2010209O12Rik | 12.5971    | 0.79 | 6.3%   |
| 2010300C02Rik | 0.8450982  | 0.08 | 9.4%   |
| 2010301N04Rik | 2.023488   | 0.33 | 16.5%  |
| 2010305A19Rik | 4.01778    | 0.44 | 10.9%  |
| 2010305C02Rik | 0.06475958 | 0.04 | 54.7%  |
| 2010309E21Rik | 10.03154   | 0.47 | 4.7%   |
| 2010311D03Rik | 23.32072   | 1.45 | 6.2%   |

|               |            |      |        |
|---------------|------------|------|--------|
| 2010315B03Rik | 0          | 0.00 |        |
| 2010315L10Rik | 0.7208616  | 0.68 | 93.9%  |
| 2010316F05Rik | 0.9874186  | 0.13 | 13.5%  |
| 2010317E24Rik | 0.3458298  | 0.04 | 12.5%  |
| 2010321M09Rik | 4.808374   | 0.28 | 5.8%   |
| 2200001I15Rik | 0          | 0.00 |        |
| 2200002D01Rik | 0.364074   | 0.18 | 50.5%  |
| 2200002J24Rik | 0          | 0.00 |        |
| 2200002K05Rik | 1.721994   | 0.21 | 12.0%  |
| 2210009G21Rik | 6.245972   | 0.78 | 12.5%  |
| 2210010B09Rik | 6.308212   | 0.38 | 6.0%   |
| 2210010C04Rik | 0.00377752 | 0.01 | 223.6% |
| 2210010C17Rik | 0.4472516  | 0.08 | 18.2%  |
| 2210010L05Rik | 22.92178   | 0.77 | 3.4%   |
| 2210010N04Rik | 9.735392   | 1.07 | 11.0%  |
| 2210012G02Rik | 2.854774   | 0.21 | 7.3%   |
| 2210016L21Rik | 55.97806   | 2.74 | 4.9%   |
| 2210018M11Rik | 6.775838   | 0.33 | 4.8%   |
| 2210020M01Rik | 0.03290396 | 0.02 | 68.9%  |
| 2210021J22Rik | 3.409254   | 0.26 | 7.6%   |
| 2210023G05Rik | 0.14353486 | 0.11 | 74.0%  |
| 2210038L17Rik | 7.754588   | 1.95 | 25.1%  |
| 2210404O07Rik | 0.10099006 | 0.07 | 74.0%  |
| 2210407C18Rik | 0.0757988  | 0.04 | 57.7%  |
| 2210408I21Rik | 3.747958   | 0.37 | 9.9%   |
| 2210411K11Rik | 0.3317572  | 0.10 | 30.3%  |
| 2210412D01Rik | 13.52482   | 1.81 | 13.4%  |
| 2210415F13Rik | 0.04690444 | 0.05 | 100.6% |
| 2210417D09Rik | 0.0431187  | 0.04 | 89.5%  |
| 2210418G03Rik | 0          | 0.00 |        |
| 2210418O10Rik | 0.12438156 | 0.04 | 34.2%  |
| 2210421G13Rik | 0          | 0.00 |        |
| 2300002D11Rik | 45.94574   | 2.23 | 4.8%   |
| 2300002M23Rik | 0          | 0.00 |        |
| 2300005B03Rik | 0          | 0.00 |        |
| 2300009A05Rik | 0.8100034  | 0.16 | 19.1%  |
| 2310001A20Rik | 21.80196   | 0.50 | 2.3%   |
| 2310001H12Rik | 4.805826   | 0.16 | 3.3%   |
| 2310002B06Rik | 17.27808   | 0.48 | 2.8%   |
| 2310002B14Rik | 0          | 0.00 |        |
| 2310002J15Rik | 0.11204132 | 0.07 | 65.2%  |
| 2310002L09Rik | 0.0068133  | 0.02 | 223.6% |
| 2310002L13Rik | 0          | 0.00 |        |
| 2310003C23Rik | 16.1298    | 0.39 | 2.4%   |
| 2310003F16Rik | 32.3994    | 2.63 | 8.1%   |
| 2310003H01Rik | 10.95044   | 1.48 | 13.6%  |
| 2310003L22Rik | 26.51944   | 0.95 | 3.6%   |

|               |            |      |        |
|---------------|------------|------|--------|
| 2310004I24Rik | 5.441872   | 0.76 | 14.0%  |
| 2310004L02Rik | 14.31124   | 0.81 | 5.7%   |
| 2310004N24Rik | 12.5898    | 1.45 | 11.5%  |
| 2310005E10Rik | 1.808974   | 0.32 | 17.6%  |
| 2310005G13Rik | 0.13459448 | 0.06 | 41.3%  |
| 2310005N01Rik | 29.66938   | 1.83 | 6.2%   |
| 2310005N03Rik | 8.493132   | 1.36 | 16.0%  |
| 2310005P05Rik | 1.844174   | 0.22 | 11.9%  |
| 2310007A19Rik | 0.1075833  | 0.07 | 65.9%  |
| 2310007B03Rik | 0          | 0.00 |        |
| 2310007D09Rik | 0.0514694  | 0.02 | 43.4%  |
| 2310007F21Rik | 23.57056   | 0.99 | 4.2%   |
| 2310007H09Rik | 5.900794   | 1.11 | 18.9%  |
| 2310007L24Rik | 0          | 0.00 |        |
| 2310008H04Rik | 0.787943   | 0.17 | 21.3%  |
| 2310008H09Rik | 6.909052   | 1.22 | 17.6%  |
| 2310008M10Rik | 32.85488   | 2.85 | 8.7%   |
| 2310009B15Rik | 3.06447    | 0.38 | 12.6%  |
| 2310009E04Rik | 3.036928   | 0.47 | 15.6%  |
| 2310010M20Rik | 0.08078542 | 0.05 | 66.2%  |
| 2310010M24Rik | 7.241472   | 0.53 | 7.4%   |
| 2310011G06Rik | 0          | 0.00 |        |
| 2310011J03Rik | 6.278424   | 0.77 | 12.3%  |
| 2310014G06Rik | 11.0526    | 0.21 | 1.9%   |
| 2310014H01Rik | 0.6058396  | 0.20 | 33.5%  |
| 2310014L17Rik | 0.12911264 | 0.03 | 22.2%  |
| 2310015A05Rik | 1.37673    | 0.15 | 11.0%  |
| 2310015N07Rik | 0.5533724  | 0.30 | 54.1%  |
| 2310016C08Rik | 2.815724   | 0.83 | 29.4%  |
| 2310016C16Rik | 5.403606   | 0.78 | 14.5%  |
| 2310016E02Rik | 3.604672   | 0.68 | 18.9%  |
| 2310016F22Rik | 0.01888244 | 0.02 | 105.7% |
| 2310016M24Rik | 42.46042   | 2.32 | 5.5%   |
| 2310021H06Rik | 0          | 0.00 |        |
| 2310021P13Rik | 22.00676   | 0.67 | 3.1%   |
| 2310022A10Rik | 9.17343    | 0.35 | 3.8%   |
| 2310022B05Rik | 3.11959    | 0.29 | 9.3%   |
| 2310022K01Rik | 0.5121114  | 0.27 | 53.0%  |
| 2310022M17Rik | 18.91586   | 0.29 | 1.5%   |
| 2310026E23Rik | 5.748338   | 0.82 | 14.2%  |
| 2310028H24Rik | 63.758     | 1.80 | 2.8%   |
| 2310028N02Rik | 3.395548   | 0.21 | 6.3%   |
| 2310028O11Rik | 66.9335    | 1.21 | 1.8%   |
| 2310030G06Rik | 0.16217684 | 0.07 | 42.1%  |
| 2310030N02Rik | 5.27722    | 0.19 | 3.6%   |
| 2310031A18Rik | 0.02469014 | 0.02 | 68.4%  |
| 2310033E01Rik | 0          | 0.00 |        |

|               |             |      |        |
|---------------|-------------|------|--------|
| 2310033K02Rik | 0.07710308  | 0.02 | 25.8%  |
| 2310033P09Rik | 4.324358    | 0.17 | 3.9%   |
| 2310034C09Rik | 0           | 0.00 |        |
| 2310035C23Rik | 18.9986     | 0.89 | 4.7%   |
| 2310035K24Rik | 9.512936    | 0.62 | 6.6%   |
| 2310036O22Rik | 25.3868     | 0.94 | 3.7%   |
| 2310037I24Rik | 3.868326    | 0.24 | 6.1%   |
| 2310038E17Rik | 0.003871724 | 0.01 | 139.3% |
| 2310038H17Rik | 5.172552    | 0.64 | 12.3%  |
| 2310039E09Rik | 0.2237972   | 0.07 | 33.2%  |
| 2310039H08Rik | 2.192186    | 0.32 | 14.8%  |
| 2310040A07Rik | 19.78282    | 1.52 | 7.7%   |
| 2310040C09Rik | 0.023144158 | 0.03 | 140.7% |
| 2310040M23Rik | 0           | 0.00 |        |
| 2310042D19Rik | 0.6201968   | 0.05 | 8.1%   |
| 2310042E16Rik | 2.958246    | 0.42 | 14.1%  |
| 2310042E22Rik | 0.01918162  | 0.04 | 223.6% |
| 2310043J07Rik | 0           | 0.00 |        |
| 2310043L02Rik | 0           | 0.00 |        |
| 2310044G17Rik | 12.1127     | 0.60 | 5.0%   |
| 2310044H10Rik | 45.76296    | 1.67 | 3.7%   |
| 2310045A20Rik | 5.030598    | 0.24 | 4.7%   |
| 2310046A06Rik | 0.09273822  | 0.04 | 43.3%  |
| 2310046K01Rik | 0.02086814  | 0.02 | 78.3%  |
| 2310046O06Rik | 9.916842    | 0.64 | 6.5%   |
| 2310047B19Rik | 4.707592    | 0.47 | 10.0%  |
| 2310047D13Rik | 2.7727      | 0.47 | 16.9%  |
| 2310047M10Rik | 11.379236   | 1.06 | 9.3%   |
| 2310047O13Rik | 11.68186    | 0.95 | 8.1%   |
| 2310051M13Rik | 0           | 0.00 |        |
| 2310056P07Rik | 16.5848     | 2.05 | 12.4%  |
| 2310057J16Rik | 16.7141     | 1.13 | 6.8%   |
| 2310057J18Rik | 0.01378774  | 0.03 | 223.6% |
| 2310057M21Rik | 8.394212    | 0.85 | 10.1%  |
| 2310057N15Rik | 0           | 0.00 |        |
| 2310058O09Rik | 0.3126374   | 0.05 | 15.6%  |
| 2310061C15Rik | 4.718968    | 0.38 | 8.0%   |
| 2310061F22Rik | 0.621377    | 0.05 | 7.9%   |
| 2310061I04Rik | 31.89682    | 0.63 | 2.0%   |
| 2310061J03Rik | 4.098512    | 0.38 | 9.2%   |
| 2310065K24Rik | 24.53486    | 1.60 | 6.5%   |
| 2310066E14Rik | 18.27118    | 0.81 | 4.4%   |
| 2310067B10Rik | 7.14661     | 0.81 | 11.3%  |
| 2310073E15Rik | 10.837046   | 2.84 | 26.2%  |
| 2310076L09Rik | 0.5848508   | 0.06 | 9.9%   |
| 2310079F23Rik | 1.7665      | 0.08 | 4.8%   |
| 2310079N02Rik | 10.349922   | 0.65 | 6.2%   |

|               |            |      |        |
|---------------|------------|------|--------|
| 2400001E08Rik | 26.85296   | 2.99 | 11.2%  |
| 2400003C14Rik | 30.38488   | 0.55 | 1.8%   |
| 2410001C21Rik | 22.79594   | 0.92 | 4.0%   |
| 2410002F23Rik | 19.32322   | 1.57 | 8.1%   |
| 2410002I01Rik | 5.447688   | 0.18 | 3.2%   |
| 2410002M20Rik | 0.11697874 | 0.06 | 52.4%  |
| 2410002O22Rik | 15.51572   | 0.60 | 3.9%   |
| 2410003J06Rik | 0.04656054 | 0.02 | 32.3%  |
| 2410004A20Rik | 0.00388522 | 0.01 | 223.6% |
| 2410004B18Rik | 11.7338    | 0.71 | 6.1%   |
| 2410004F06Rik | 0.1394642  | 0.03 | 18.8%  |
| 2410004L22Rik | 6.70188    | 0.39 | 5.8%   |
| 2410005O16Rik | 4.11119    | 0.25 | 6.1%   |
| 2410008K03Rik | 0.4084994  | 0.10 | 25.5%  |
| 2410012H22Rik | 6.579706   | 0.95 | 14.5%  |
| 2410014A08Rik | 29.89028   | 1.67 | 5.6%   |
| 2410015M20Rik | 21.85408   | 0.81 | 3.7%   |
| 2410015N17Rik | 6.968058   | 0.60 | 8.7%   |
| 2410016O06Rik | 2.723386   | 0.25 | 9.2%   |
| 2410017P07Rik | 2.038724   | 0.22 | 10.9%  |
| 2410018C17Rik | 2.802098   | 0.26 | 9.3%   |
| 2410018C20Rik | 2.890088   | 0.15 | 5.4%   |
| 2410018G20Rik | 10.121118  | 0.78 | 7.7%   |
| 2410018L13Rik | 0.7055844  | 0.16 | 22.3%  |
| 2410018M08Rik | 3.751584   | 0.30 | 8.0%   |
| 2410019A14Rik | 6.999116   | 0.39 | 5.6%   |
| 2410022L05Rik | 27.24488   | 2.05 | 7.5%   |
| 2410022M11Rik | 0.8267852  | 0.05 | 6.6%   |
| 2410025L10Rik | 5.320242   | 0.38 | 7.1%   |
| 2410042D21Rik | 4.140822   | 0.27 | 6.5%   |
| 2410066E13Rik | 20.48358   | 0.54 | 2.6%   |
| 2410075B13Rik | 3.975484   | 0.31 | 7.9%   |
| 2410076I21Rik | 1.666622   | 0.42 | 25.0%  |
| 2410081M15Rik | 1.973688   | 0.39 | 19.8%  |
| 2410089E03Rik | 7.0603     | 0.22 | 3.1%   |
| 2410091C18Rik | 12.34312   | 0.36 | 2.9%   |
| 2410116G06Rik | 0          | 0.00 |        |
| 2410127E18Rik | 50.5846    | 1.97 | 3.9%   |
| 2410127L17Rik | 0.07807456 | 0.05 | 66.5%  |
| 2410129H14Rik | 23.32582   | 1.22 | 5.2%   |
| 2410131K14Rik | 16.30604   | 0.40 | 2.4%   |
| 2410137M14Rik | 0.11470718 | 0.10 | 83.2%  |
| 2410141K09Rik | 0          | 0.00 |        |
| 2410146L05Rik | 0          | 0.00 |        |
| 2410166I05Rik | 17.56296   | 0.68 | 3.9%   |
| 2410187C16Rik | 2.531718   | 0.36 | 14.3%  |
| 2500002L14Rik | 1.3556906  | 0.85 | 63.0%  |



|               |            |      |        |
|---------------|------------|------|--------|
| 2500003M10Rik | 16.78492   | 3.96 | 23.6%  |
| 2510002D24Rik | 4.725502   | 0.40 | 8.5%   |
| 2510003E04Rik | 38.97834   | 1.72 | 4.4%   |
| 2510006C20Rik | 1.2325724  | 0.64 | 51.5%  |
| 2510006D16Rik | 32.93182   | 3.49 | 10.6%  |
| 2510009E07Rik | 19.24796   | 0.46 | 2.4%   |
| 2510012J08Rik | 4.553      | 0.22 | 4.7%   |
| 2510027J23Rik | 0          | 0.00 |        |
| 2510039O18Rik | 7.21227    | 0.40 | 5.5%   |
| 2510048L02Rik | 3.182468   | 0.58 | 18.3%  |
| 2510049I19Rik | 29.77276   | 1.31 | 4.4%   |
| 2600001A11Rik | 0.7097314  | 0.08 | 11.0%  |
| 2600005O03Rik | 0.1811828  | 0.03 | 15.5%  |
| 2600009E05Rik | 18.31      | 1.15 | 6.3%   |
| 2600010E01Rik | 0.3006504  | 0.06 | 20.4%  |
| 2600011C06Rik | 19.33538   | 0.37 | 1.9%   |
| 2600011E07Rik | 3.421516   | 0.34 | 10.0%  |
| 2610001J05Rik | 10.29651   | 0.96 | 9.4%   |
| 2610002D18Rik | 0.10357378 | 0.04 | 42.9%  |
| 2610002J02Rik | 6.317396   | 0.21 | 3.4%   |
| 2610002M06Rik | 17.5362    | 0.75 | 4.3%   |
| 2610003J06Rik | 13.03652   | 0.68 | 5.3%   |
| 2610008E11Rik | 6.45701    | 0.18 | 2.7%   |
| 2610015P09Rik | 0.406982   | 0.04 | 9.5%   |
| 2610016C23Rik | 0.2157082  | 0.05 | 22.6%  |
| 2610018G03Rik | 0.3829466  | 0.10 | 25.0%  |
| 2610018I03Rik | 1.583138   | 0.18 | 11.4%  |
| 2610019A05Rik | 6.975672   | 1.07 | 15.3%  |
| 2610019F03Rik | 2.753764   | 0.35 | 12.9%  |
| 2610019P18Rik | 3.614666   | 0.28 | 7.6%   |
| 2610020H08Rik | 0.572209   | 0.07 | 11.9%  |
| 2610021K21Rik | 0.10109988 | 0.05 | 47.1%  |
| 2610024E20Rik | 25.54548   | 4.38 | 17.1%  |
| 2610024G14Rik | 7.909444   | 0.27 | 3.4%   |
| 2610027C15Rik | 1.590822   | 0.41 | 25.6%  |
| 2610027L16Rik | 3.854502   | 0.57 | 14.8%  |
| 2610028A01Rik | 1.674882   | 0.37 | 22.0%  |
| 2610028H24Rik | 0.02814836 | 0.01 | 44.7%  |
| 2610029G23Rik | 4.178082   | 0.39 | 9.3%   |
| 2610029I01Rik | 7.311352   | 0.18 | 2.5%   |
| 2610030H06Rik | 18.25238   | 0.95 | 5.2%   |
| 2610034B18Rik | 5.400224   | 0.47 | 8.6%   |
| 2610034M16Rik | 0.01484894 | 0.03 | 187.6% |
| 2610036D13Rik | 5.974488   | 0.26 | 4.4%   |
| 2610036L11Rik | 1.633358   | 0.52 | 31.6%  |
| 2610039C10Rik | 1.455744   | 0.23 | 15.9%  |
| 2610042L04Rik | 0.11147006 | 0.02 | 17.3%  |

|               |            |      |        |
|---------------|------------|------|--------|
| 2610044O15Rik | 10.354252  | 1.20 | 11.6%  |
| 2610101N10Rik | 17.77162   | 1.47 | 8.3%   |
| 2610109H07Rik | 1.000285   | 0.17 | 17.0%  |
| 2610110G12Rik | 32.81068   | 3.59 | 10.9%  |
| 2610200G18Rik | 10.590024  | 1.78 | 16.8%  |
| 2610203E10Rik | 1.29776    | 0.18 | 13.9%  |
| 2610204K14Rik | 2.104916   | 0.34 | 16.2%  |
| 2610204M08Rik | 0.5989204  | 0.12 | 20.8%  |
| 2610205E22Rik | 13.55534   | 1.59 | 11.7%  |
| 2610206B13Rik | 5.711834   | 0.39 | 6.8%   |
| 2610207I05Rik | 6.886458   | 0.76 | 11.0%  |
| 2610208M17Rik | 0          | 0.00 |        |
| 2610209A20Rik | 1.540222   | 0.09 | 5.7%   |
| 2610209M04Rik | 15.7995    | 1.12 | 7.1%   |
| 2610301B20Rik | 11.19688   | 0.43 | 3.8%   |
| 2610301F02Rik | 0.2763046  | 0.08 | 28.1%  |
| 2610301G19Rik | 20.30156   | 0.36 | 1.8%   |
| 2610304G08Rik | 8.553648   | 0.33 | 3.9%   |
| 2610305D13Rik | 0.540975   | 0.16 | 30.2%  |
| 2610318N02Rik | 0.13209584 | 0.05 | 40.2%  |
| 2610507B11Rik | 40.93136   | 2.12 | 5.2%   |
| 2610510H03Rik | 10.392906  | 0.54 | 5.2%   |
| 2610524H06Rik | 13.8169    | 1.68 | 12.1%  |
| 2610528E23Rik | 3.35778    | 0.47 | 13.9%  |
| 2610528J11Rik | 0.00541438 | 0.01 | 223.6% |
| 2610528K11Rik | 26.17946   | 1.41 | 5.4%   |
| 2610529C04Rik | 5.29727    | 0.61 | 11.5%  |
| 2700007P21Rik | 11.18796   | 0.74 | 6.6%   |
| 2700019D07Rik | 2.780744   | 0.26 | 9.2%   |
| 2700029M09Rik | 17.43224   | 2.09 | 12.0%  |
| 2700038C09Rik | 11.50934   | 1.59 | 13.9%  |
| 2700038N03Rik | 14.22082   | 1.63 | 11.4%  |
| 2700045P11Rik | 0.2901038  | 0.14 | 49.6%  |
| 2700049A03Rik | 1.39772    | 0.12 | 8.5%   |
| 2700049P18Rik | 0.4310504  | 0.03 | 7.2%   |
| 2700050L05Rik | 6.1        | 0.28 | 4.6%   |
| 2700059D21Rik | 22.48452   | 1.74 | 7.8%   |
| 2700060E02Rik | 7.945092   | 0.58 | 7.4%   |
| 2700062C07Rik | 5.023156   | 0.74 | 14.8%  |
| 2700078E11Rik | 13.44272   | 0.74 | 5.5%   |
| 2700078K21Rik | 7.830544   | 0.76 | 9.8%   |
| 2700081O15Rik | 8.479726   | 0.45 | 5.3%   |
| 2700094F01Rik | 7.745226   | 0.50 | 6.5%   |
| 2700094K13Rik | 19.00616   | 1.72 | 9.1%   |
| 2700097O09Rik | 2.303772   | 0.23 | 10.2%  |
| 2810002D19Rik | 1.2185354  | 0.25 | 20.9%  |
| 2810002G02Rik | 8.07181    | 0.56 | 6.9%   |

|               |            |      |        |
|---------------|------------|------|--------|
| 2810002I04Rik | 0.3417378  | 0.04 | 10.7%  |
| 2810002N01Rik | 14.71984   | 1.91 | 12.9%  |
| 2810002O09Rik | 5.313556   | 0.26 | 5.0%   |
| 2810003C17Rik | 0.7721326  | 0.12 | 15.2%  |
| 2810004N23Rik | 6.189032   | 0.32 | 5.2%   |
| 2810006K23Rik | 2.98921    | 0.29 | 9.6%   |
| 2810007J24Rik | 0          | 0.00 |        |
| 2810008M24Rik | 15.25514   | 0.69 | 4.5%   |
| 2810012G03Rik | 13.71508   | 0.55 | 4.0%   |
| 2810021B07Rik | 2.533382   | 0.12 | 4.6%   |
| 2810021J22Rik | 2.750398   | 0.13 | 4.8%   |
| 2810022L02Rik | 23.24186   | 1.97 | 8.5%   |
| 2810025M15Rik | 5.719792   | 1.05 | 18.4%  |
| 2810026P18Rik | 7.718404   | 0.89 | 11.5%  |
| 2810030E01Rik | 2.112178   | 0.14 | 6.8%   |
| 2810032E02Rik | 35.64508   | 2.08 | 5.8%   |
| 2810046L04Rik | 3.889072   | 0.42 | 10.9%  |
| 2810047C21Rik | 0.00480488 | 0.01 | 223.6% |
| 2810048G17Rik | 0.0083837  | 0.01 | 143.9% |
| 2810051F02Rik | 2.741854   | 0.53 | 19.3%  |
| 2810055F11Rik | 0.9505368  | 0.10 | 10.5%  |
| 2810403A07Rik | 13.43922   | 0.62 | 4.6%   |
| 2810405J04Rik | 15.55364   | 1.57 | 10.1%  |
| 2810405K02Rik | 16.8095    | 1.02 | 6.1%   |
| 2810406K13Rik | 0.03799318 | 0.02 | 52.1%  |
| 2810407C02Rik | 78.41994   | 3.31 | 4.2%   |
| 2810408A11Rik | 0.1856112  | 0.01 | 7.1%   |
| 2810408M09Rik | 2.978732   | 0.16 | 5.4%   |
| 2810409K11Rik | 0.6269006  | 0.05 | 7.3%   |
| 2810410C14Rik | 1.19709    | 0.13 | 10.8%  |
| 2810410M20Rik | 23.00128   | 2.16 | 9.4%   |
| 2810416G20Rik | 0.021828   | 0.03 | 118.9% |
| 2810417H13Rik | 0.6717414  | 0.11 | 16.8%  |
| 2810422J05Rik | 11.9176    | 0.67 | 5.6%   |
| 2810422O20Rik | 1.696734   | 0.17 | 10.1%  |
| 2810426N06Rik | 12.4441    | 0.15 | 1.2%   |
| 2810428I15Rik | 20.61208   | 2.30 | 11.1%  |
| 2810432D09Rik | 6.847718   | 0.56 | 8.1%   |
| 2810432L12Rik | 42.20322   | 2.34 | 5.6%   |
| 2810433K01Rik | 0.09829742 | 0.02 | 25.2%  |
| 2810439F02Rik | 6.856918   | 0.37 | 5.4%   |
| 2810441K11Rik | 7.25482    | 0.63 | 8.6%   |
| 2810451A06Rik | 0.09528506 | 0.03 | 36.3%  |
| 2810452K22Rik | 13.8671    | 1.35 | 9.7%   |
| 2810453I06Rik | 8.46529    | 0.63 | 7.4%   |
| 2810457I06Rik | 7.919898   | 0.77 | 9.8%   |
| 2810459M11Rik | 4.669004   | 0.38 | 8.2%   |

|               |             |       |       |
|---------------|-------------|-------|-------|
| 2810474019Rik | 2.321794    | 0.28  | 11.9% |
| 2810485I05Rik | 3.723238    | 0.38  | 10.3% |
| 2810487A22Rik | 0.10320256  | 0.04  | 36.9% |
| 2900002H16Rik | 6.780316    | 0.51  | 7.6%  |
| 2900006F19Rik | 0.6887922   | 0.26  | 37.6% |
| 2900006K08Rik | 0.493104    | 0.14  | 28.2% |
| 2900009I07Rik | 10.024072   | 1.01  | 10.0% |
| 2900010J23Rik | 62.59508    | 2.29  | 3.7%  |
| 2900010M23Rik | 23.59312    | 2.04  | 8.6%  |
| 2900011O08Rik | 78.87338    | 1.35  | 1.7%  |
| 2900024C23Rik | 33.75976    | 2.01  | 5.9%  |
| 2900024O10Rik | 36.3979     | 2.90  | 8.0%  |
| 2900026A02Rik | 0.8897346   | 0.09  | 10.6% |
| 2900042B11Rik | 7.022408    | 1.18  | 16.9% |
| 2900046G09Rik | 12.37066    | 0.76  | 6.1%  |
| 2900057K09Rik | 2.511796    | 0.23  | 9.1%  |
| 2900064A13Rik | 46.30212    | 1.48  | 3.2%  |
| 2900073G15Rik | 13.26884    | 1.15  | 8.6%  |
| 2900075B16Rik | 27.87902    | 2.14  | 7.7%  |
| 2900083I11Rik | 6.653036    | 0.16  | 2.5%  |
| 2900092C05Rik | 0           | 0.00  |       |
| 2900092E17Rik | 23.67724    | 2.18  | 9.2%  |
| 2b4           | 0.005377904 | 0.00  | 62.8% |
| 3000004C01Rik | 0.4184136   | 0.10  | 24.8% |
| 3010026O09Rik | 10.99906    | 0.80  | 7.3%  |
| 3100002J23Rik | 0.12665888  | 0.11  | 90.4% |
| 3100004P22Rik | 18.52936    | 1.25  | 6.8%  |
| 3110001A13Rik | 3.914844    | 0.41  | 10.4% |
| 3110001D03Rik | 14.06376    | 0.60  | 4.3%  |
| 3110001I20Rik | 10.12092    | 0.56  | 5.5%  |
| 3110001I22Rik | 0.9444018   | 0.16  | 17.1% |
| 3110001K24Rik | 1.672424    | 0.20  | 12.2% |
| 3110002H16Rik | 11.4698     | 0.31  | 2.7%  |
| 3110003A17Rik | 6.052354    | 0.69  | 11.4% |
| 3110003A22Rik | 6.213328    | 0.33  | 5.4%  |
| 3110004L20Rik | 30.1232     | 2.54  | 8.4%  |
| 3110005G23Rik | 15.43662    | 0.33  | 2.2%  |
| 3110006E14Rik | 139.3828    | 18.43 | 13.2% |
| 3110007F17Rik | 0.04219     | 0.03  | 72.7% |
| 3110009E18Rik | 1.2558396   | 0.38  | 30.5% |
| 3110031B13Rik | 3.37942     | 0.32  | 9.4%  |
| 3110032G18Rik | 0.29182334  | 0.14  | 48.1% |
| 3110035E14Rik | 2.940282    | 0.36  | 12.4% |
| 3110037I16Rik | 2.67583     | 0.39  | 14.7% |
| 3110040N11Rik | 9.072414    | 0.58  | 6.4%  |
| 3110043J09Rik | 0.1569848   | 0.04  | 25.0% |
| 3110043O21Rik | 23.76848    | 1.12  | 4.7%  |

|               |            |      |        |
|---------------|------------|------|--------|
| 3110045G13Rik | 0.884246   | 0.16 | 18.2%  |
| 3110047P20Rik | 0.0423266  | 0.01 | 24.0%  |
| 3110048E14Rik | 10.544086  | 0.51 | 4.8%   |
| 3110049J23Rik | 0.1945366  | 0.04 | 19.0%  |
| 3110050N22Rik | 32.90608   | 1.31 | 4.0%   |
| 3110052M02Rik | 8.401652   | 0.43 | 5.1%   |
| 3110056O03Rik | 9.297998   | 1.73 | 18.6%  |
| 3110057O12Rik | 3.486368   | 0.44 | 12.5%  |
| 3110062M04Rik | 0.7594686  | 0.11 | 14.1%  |
| 3110070M22Rik | 0.2198568  | 0.05 | 21.9%  |
| 3110079O15Rik | 0.0296235  | 0.04 | 147.0% |
| 3110082D06Rik | 0.62677    | 0.09 | 13.6%  |
| 3110082I17Rik | 1.53767    | 0.28 | 18.2%  |
| 3200001K10Rik | 2.210956   | 0.44 | 20.0%  |
| 3200002M19Rik | 7.256864   | 4.09 | 56.3%  |
| 3222402P14Rik | 12.58908   | 1.03 | 8.2%   |
| 3230401D17Rik | 0.310744   | 0.08 | 24.5%  |
| 3230401M21Rik | 1.726408   | 0.11 | 6.2%   |
| 3300001A09Rik | 0.6374002  | 0.10 | 15.5%  |
| 3300001G02Rik | 7.993382   | 0.80 | 10.0%  |
| 3300001P08Rik | 37.3179    | 1.48 | 4.0%   |
| 3300002A11Rik | 0          | 0.00 |        |
| 3300002I08Rik | 0.6258234  | 0.28 | 44.7%  |
| 3321401G04Rik | 78.96576   | 3.62 | 4.6%   |
| 3322402L07Rik | 0.00385152 | 0.01 | 223.6% |
| 3632451O06Rik | 6.534324   | 0.84 | 12.8%  |
| 3830402I07Rik | 3.037862   | 0.27 | 8.9%   |
| 3830403N18Rik | 0.00818668 | 0.02 | 223.6% |
| 3830406C13Rik | 9.194658   | 0.55 | 6.0%   |
| 3830408D24Rik | 0.03909626 | 0.03 | 73.3%  |
| 3830417A13Rik | 0          | 0.00 |        |
| 3930401K13Rik | 45.99038   | 1.50 | 3.3%   |
| 4121402D02Rik | 42.1814    | 1.70 | 4.0%   |
| 4430402I18Rik | 1.406535   | 0.84 | 59.8%  |
| 4432412L15Rik | 1.594898   | 0.31 | 19.7%  |
| 4432416J03Rik | 0.05248056 | 0.02 | 45.7%  |
| 4631405J19Rik | 0.00259732 | 0.01 | 223.6% |
| 4631416L12Rik | 2.799848   | 0.14 | 4.9%   |
| 4631422C13Rik | 0.5925212  | 0.04 | 6.5%   |
| 4631422O05Rik | 0.4604504  | 0.11 | 23.3%  |
| 4631424J17Rik | 5.05421    | 0.11 | 2.3%   |
| 4631426E05Rik | 0          | 0.00 |        |
| 4631426J05Rik | 7.995332   | 0.57 | 7.1%   |
| 4631427C17Rik | 28.25544   | 1.30 | 4.6%   |
| 4632404H22Rik | 1.185719   | 0.45 | 38.1%  |
| 4632408A20Rik | 0.03178676 | 0.02 | 48.8%  |
| 4632411B12Rik | 20.43498   | 0.90 | 4.4%   |

|               |            |      |        |
|---------------|------------|------|--------|
| 4632411J06Rik | 0.201857   | 0.02 | 11.6%  |
| 4632412N22Rik | 0.03978188 | 0.01 | 32.6%  |
| 4632415K11Rik | 3.165162   | 0.24 | 7.6%   |
| 4632417K18Rik | 1.343512   | 0.09 | 6.9%   |
| 4632417N05Rik | 0.5381512  | 0.04 | 6.5%   |
| 4632419I22Rik | 2.106962   | 0.24 | 11.5%  |
| 4632419K20Rik | 7.318868   | 0.37 | 5.0%   |
| 4632425D07Rik | 5.51997    | 0.52 | 9.4%   |
| 4632428N05Rik | 0.4283556  | 0.04 | 10.3%  |
| 4632433K11Rik | 0.6981306  | 0.12 | 17.6%  |
| 4632434I11Rik | 0.8436022  | 0.06 | 6.7%   |
| 4732415M23Rik | 0.5316276  | 0.11 | 20.6%  |
| 4732418C07Rik | 8.152494   | 0.81 | 10.0%  |
| 4732429D16Rik | 0          | 0.00 |        |
| 4732435N03Rik | 2.174784   | 0.12 | 5.4%   |
| 4732454E20Rik | 0          | 0.00 |        |
| 4732456N10Rik | 0.00217902 | 0.00 | 223.6% |
| 4732466D17Rik | 0.0883998  | 0.03 | 33.6%  |
| 4732471D19Rik | 5.428724   | 0.18 | 3.3%   |
| 4732473B16Rik | 0.07018796 | 0.04 | 56.2%  |
| 4732474O15Rik | 0.01234678 | 0.01 | 94.2%  |
| 4732479N06Rik | 4.156364   | 0.32 | 7.7%   |
| 4732495G21Rik | 0.00281148 | 0.01 | 223.6% |
| 4732496O08Rik | 4.540102   | 0.20 | 4.5%   |
| 4733401H18Rik | 11.63162   | 1.01 | 8.6%   |
| 4733401H21Rik | 0          | 0.00 |        |
| 4831416G18Rik | 0.03019856 | 0.02 | 51.0%  |
| 4831426I19Rik | 0.04773958 | 0.02 | 48.6%  |
| 4832428D23Rik | 0.0032966  | 0.01 | 223.6% |
| 4833401D15Rik | 0.0839098  | 0.19 | 223.6% |
| 4833409A17Rik | 0.2345262  | 0.05 | 21.1%  |
| 4833413O15Rik | 0          | 0.00 |        |
| 4833418A01Rik | 3.282708   | 0.17 | 5.2%   |
| 4833420G17Rik | 1.928148   | 0.21 | 10.9%  |
| 4833422F24Rik | 0.00256972 | 0.01 | 223.6% |
| 4833423E24Rik | 0.0601359  | 0.04 | 65.6%  |
| 4833424O15Rik | 11.136962  | 1.26 | 11.3%  |
| 4833426J09Rik | 3.694658   | 0.21 | 5.7%   |
| 4833427G06Rik | 0.03991308 | 0.04 | 100.3% |
| 4833430A08Rik | 0.0061492  | 0.01 | 137.3% |
| 4833436C18Rik | 0.10722258 | 0.06 | 57.1%  |
| 4833439L19Rik | 30.3829    | 1.20 | 3.9%   |
| 4833442J19Rik | 1.71204    | 0.38 | 21.9%  |
| 4833446K15Rik | 2.13385    | 0.14 | 6.7%   |
| 4921501E09Rik | 0.00232644 | 0.01 | 223.6% |
| 4921504E06Rik | 0          | 0.00 |        |
| 4921505C17Rik | 10.674314  | 1.25 | 11.7%  |

|               |            |      |        |
|---------------|------------|------|--------|
| 4921506J03Rik | 90.15358   | 3.40 | 3.8%   |
| 4921506M07Rik | 0.00366702 | 0.01 | 223.6% |
| 4921507P07Rik | 0.7185276  | 0.08 | 10.7%  |
| 4921509B22Rik | 0.00312126 | 0.01 | 223.6% |
| 4921509C19Rik | 0          | 0.00 |        |
| 4921509E05Rik | 0.5677716  | 0.11 | 18.9%  |
| 4921509E07Rik | 0.08756128 | 0.03 | 33.4%  |
| 4921510H08Rik | 0          | 0.00 |        |
| 4921510J17Rik | 0.01478804 | 0.01 | 92.3%  |
| 4921511C04Rik | 0.02104706 | 0.02 | 116.3% |
| 4921511C20Rik | 0          | 0.00 |        |
| 4921511H03Rik | 0          | 0.00 |        |
| 4921511H13Rik | 0.06645078 | 0.01 | 20.5%  |
| 4921513D11Rik | 0.2218846  | 0.05 | 22.2%  |
| 4921513D23Rik | 8.693376   | 1.19 | 13.7%  |
| 4921515J06Rik | 0.03337936 | 0.02 | 61.8%  |
| 4921517B04Rik | 4.501456   | 0.73 | 16.2%  |
| 4921517D21Rik | 0          | 0.00 |        |
| 4921517D22Rik | 0.00471028 | 0.01 | 137.0% |
| 4921517L17Rik | 1.447512   | 0.09 | 6.0%   |
| 4921517N04Rik | 4.431944   | 0.55 | 12.4%  |
| 4921520G13Rik | 0.1228554  | 0.06 | 46.4%  |
| 4921521F21Rik | 0.2755072  | 0.07 | 25.7%  |
| 4921523A10Rik | 0.09506318 | 0.03 | 28.4%  |
| 4921524J06Rik | 0.05540302 | 0.03 | 49.5%  |
| 4921524J17Rik | 4.017418   | 0.24 | 6.0%   |
| 4921524L21Rik | 0          | 0.00 |        |
| 4921525H12Rik | 0.00926286 | 0.01 | 71.7%  |
| 4921526F01Rik | 0.17104152 | 0.05 | 27.6%  |
| 4921528H16Rik | 0.438134   | 0.13 | 29.8%  |
| 4921528I01Rik | 0.01546794 | 0.01 | 84.0%  |
| 4921528O07Rik | 0          | 0.00 |        |
| 4921530D09Rik | 0.2572178  | 0.08 | 29.4%  |
| 4921530G04Rik | 0.00293236 | 0.01 | 223.6% |
| 4921530L21Rik | 0.00539258 | 0.01 | 223.6% |
| 4921531P07Rik | 0.01600704 | 0.02 | 98.7%  |
| 4921533L14Rik | 9.532668   | 0.48 | 5.1%   |
| 4921536K21Rik | 0.1136836  | 0.04 | 33.2%  |
| 4921537P18Rik | 0.00401608 | 0.01 | 223.6% |
| 4921539E11Rik | 0.00305196 | 0.01 | 223.6% |
| 4922501C03Rik | 1.0058602  | 0.17 | 16.5%  |
| 4922501K12Rik | 0.01103642 | 0.01 | 94.1%  |
| 4922502D21Rik | 0          | 0.00 |        |
| 4922503N01Rik | 5.27966    | 0.44 | 8.3%   |
| 4922505E12Rik | 0.00207642 | 0.00 | 223.6% |
| 4922505G16Rik | 0.1458878  | 0.03 | 18.0%  |
| 4930401A09Rik | 0          | 0.00 |        |

|               |            |      |        |
|---------------|------------|------|--------|
| 4930401F20Rik | 0          | 0.00 |        |
| 4930402E16Rik | 7.042696   | 0.31 | 4.3%   |
| 4930402F06Rik | 0.006804   | 0.02 | 223.6% |
| 4930402H24Rik | 14.242     | 0.76 | 5.4%   |
| 4930403C10Rik | 0.02688208 | 0.01 | 36.7%  |
| 4930403L05Rik | 0          | 0.00 |        |
| 4930403N07Rik | 0.01703134 | 0.02 | 140.5% |
| 4930404A10Rik | 0          | 0.00 |        |
| 4930404H21Rik | 0.01265906 | 0.03 | 223.6% |
| 4930404N11Rik | 8.155316   | 0.77 | 9.4%   |
| 4930408G06Rik | 0.00597364 | 0.01 | 223.6% |
| 4930408O21Rik | 2.868834   | 0.95 | 32.9%  |
| 4930412F15Rik | 6.337052   | 0.45 | 7.1%   |
| 4930415O20Rik | 0.05195338 | 0.04 | 71.0%  |
| 4930417G10Rik | 0.2378814  | 0.09 | 38.8%  |
| 4930417M19Rik | 0.2582054  | 0.08 | 29.4%  |
| 4930418G15Rik | 0.01784754 | 0.03 | 164.9% |
| 4930420K17Rik | 1.485134   | 0.33 | 22.4%  |
| 4930422G04Rik | 0.4318164  | 0.04 | 10.4%  |
| 4930424G05Rik | 0.1646242  | 0.04 | 25.5%  |
| 4930425N13Rik | 0.6294752  | 0.13 | 20.2%  |
| 4930427A07Rik | 0.7521004  | 0.11 | 14.6%  |
| 4930428D18Rik | 0          | 0.00 |        |
| 4930429M06Rik | 0.3688002  | 0.12 | 31.7%  |
| 4930430A15Rik | 0          | 0.00 |        |
| 4930430D24Rik | 0.00858516 | 0.01 | 137.3% |
| 4930430E16Rik | 0.5164522  | 0.16 | 31.5%  |
| 4930430F08Rik | 6.176034   | 0.56 | 9.1%   |
| 4930431J08Rik | 9.509506   | 1.38 | 14.5%  |
| 4930431L04Rik | 3.272136   | 0.46 | 14.2%  |
| 4930432H15Rik | 0          | 0.00 |        |
| 4930432K09Rik | 0          | 0.00 |        |
| 4930432K21Rik | 1.154656   | 0.11 | 9.3%   |
| 4930432O21Rik | 4.895134   | 0.46 | 9.5%   |
| 4930433I11Rik | 0          | 0.00 |        |
| 4930434E21Rik | 0.00650897 | 0.01 | 91.8%  |
| 4930435E12Rik | 0          | 0.00 |        |
| 4930443G12Rik | 0.00877568 | 0.02 | 223.6% |
| 4930444A02Rik | 9.409594   | 0.45 | 4.8%   |
| 4930449A18Rik | 0          | 0.00 |        |
| 4930449I24Rik | 0          | 0.00 |        |
| 4930451C15Rik | 0.00279814 | 0.01 | 223.6% |
| 4930451I11Rik | 0          | 0.00 |        |
| 4930452B06Rik | 1.2076152  | 0.21 | 17.6%  |
| 4930453N24Rik | 6.042366   | 0.54 | 8.9%   |
| 4930455C21Rik | 7.965806   | 1.18 | 14.8%  |
| 4930455F23Rik | 4.992144   | 0.48 | 9.6%   |



|               |            |      |        |
|---------------|------------|------|--------|
| 4930458L03Rik | 0          | 0.00 |        |
| 4930465K10Rik | 0.0330356  | 0.05 | 163.2% |
| 4930471G03Rik | 0          | 0.00 |        |
| 4930471M23Rik | 8.631766   | 0.42 | 4.8%   |
| 4930473A06Rik | 0.188505   | 0.05 | 25.2%  |
| 4930474M22Rik | 0.0079216  | 0.02 | 223.6% |
| 4930474N05Rik | 0          | 0.00 |        |
| 4930479M11Rik | 0          | 0.00 |        |
| 4930480E11Rik | 0          | 0.00 |        |
| 4930481F22Rik | 1.51126736 | 0.99 | 65.8%  |
| 4930485B16Rik | 0.2840282  | 0.08 | 26.7%  |
| 4930486G11Rik | 0.3057456  | 0.06 | 19.6%  |
| 4930486L24Rik | 0.0060861  | 0.01 | 223.6% |
| 4930488E11Rik | 1.4318614  | 0.51 | 35.5%  |
| 4930500O05Rik | 11.20268   | 0.83 | 7.4%   |
| 4930500O09Rik | 0.04727574 | 0.04 | 75.4%  |
| 4930502E18Rik | 0.01224048 | 0.02 | 141.1% |
| 4930503B20Rik | 0.01171828 | 0.02 | 141.1% |
| 4930503E14Rik | 0.0428928  | 0.04 | 104.6% |
| 4930503L19Rik | 1.908668   | 0.33 | 17.1%  |
| 4930504E06Rik | 4.420262   | 0.60 | 13.6%  |
| 4930504H06Rik | 0.05966314 | 0.04 | 60.0%  |
| 4930504O13Rik | 0          | 0.00 |        |
| 4930505A04Rik | 0.16988738 | 0.09 | 54.0%  |
| 4930505D03Rik | 13.8518    | 0.89 | 6.4%   |
| 4930506M07Rik | 22.36414   | 4.24 | 19.0%  |
| 4930507C10Rik | 0          | 0.00 |        |
| 4930507D05Rik | 0.6631882  | 0.05 | 8.0%   |
| 4930511H01Rik | 0.00425696 | 0.01 | 223.6% |
| 4930511H11Rik | 0.1106658  | 0.04 | 34.3%  |
| 4930511I11Rik | 0.01037538 | 0.01 | 138.0% |
| 4930511J11Rik | 2.11528    | 0.27 | 12.6%  |
| 4930511M11Rik | 0          | 0.00 |        |
| 4930512M02Rik | 0          | 0.00 |        |
| 4930515G01Rik | 0.0412319  | 0.03 | 71.8%  |
| 4930517K23Rik | 0          | 0.00 |        |
| 4930518C23Rik | 0          | 0.00 |        |
| 4930519B02Rik | 0.00460594 | 0.01 | 223.6% |
| 4930519F16Rik | 0.03157828 | 0.02 | 68.0%  |
| 4930519G04Rik | 0.0031952  | 0.01 | 223.6% |
| 4930519N13Rik | 0.5189226  | 0.07 | 13.5%  |
| 4930520O04Rik | 0.2301762  | 0.09 | 37.5%  |
| 4930521A18Rik | 0.00692404 | 0.02 | 223.6% |
| 4930522H14Rik | 0          | 0.00 |        |
| 4930523C11Rik | 0          | 0.00 |        |
| 4930524B15Rik | 0.008677   | 0.01 | 138.1% |
| 4930524E20Rik | 0          | 0.00 |        |

|               |            |      |        |
|---------------|------------|------|--------|
| 4930526D03Rik | 0.0566923  | 0.06 | 97.4%  |
| 4930526H21Rik | 0.21892628 | 0.09 | 42.4%  |
| 4930527E24Rik | 0          | 0.00 |        |
| 4930528F23Rik | 0.0306467  | 0.03 | 103.8% |
| 4930528G09Rik | 0.0153825  | 0.01 | 97.3%  |
| 4930529M08Rik | 0.7859306  | 0.22 | 28.3%  |
| 4930534B04Rik | 1.1603862  | 0.49 | 42.3%  |
| 4930535B03Rik | 12.73998   | 0.44 | 3.5%   |
| 4930535E21Rik | 0.00368824 | 0.00 | 109.0% |
| 4930538K18Rik | 0.4954046  | 0.11 | 21.4%  |
| 4930539E08Rik | 0.0800137  | 0.03 | 36.8%  |
| 4930542N07Rik | 0          | 0.00 |        |
| 4930544G11Rik | 0          | 0.00 |        |
| 4930544G21Rik | 10.455382  | 0.97 | 9.3%   |
| 4930544O15Rik | 0.2488466  | 0.07 | 28.7%  |
| 4930546H06Rik | 1.302032   | 0.14 | 10.5%  |
| 4930547C10Rik | 0          | 0.00 |        |
| 4930547N16Rik | 0.2517392  | 0.07 | 26.9%  |
| 4930548H24Rik | 0          | 0.00 |        |
| 4930549C01Rik | 0          | 0.00 |        |
| 4930550C14Rik | 0.03034868 | 0.03 | 100.9% |
| 4930550L24Rik | 0.01118998 | 0.02 | 144.8% |
| 4930553D19Rik | 0.10893776 | 0.08 | 72.9%  |
| 4930555I21Rik | 0.04362222 | 0.04 | 81.1%  |
| 4930558O21Rik | 0.01888316 | 0.03 | 148.0% |
| 4930560E09Rik | 0.03450284 | 0.02 | 69.2%  |
| 4930562D19Rik | 1.70379    | 0.19 | 11.0%  |
| 4930562F07Rik | 0.00275176 | 0.01 | 223.6% |
| 4930563D23Rik | 0          | 0.00 |        |
| 4930563E19Rik | 0.0110458  | 0.01 | 95.0%  |
| 4930563M21Rik | 0.00678376 | 0.02 | 223.6% |
| 4930563P21Rik | 0.01485548 | 0.02 | 141.3% |
| 4930564B18Rik | 0          | 0.00 |        |
| 4930566A11Rik | 9.9751     | 0.91 | 9.2%   |
| 4930567H17Rik | 0          | 0.00 |        |
| 4930570C03Rik | 31.85818   | 1.33 | 4.2%   |
| 4930571C24Rik | 0.10349394 | 0.11 | 105.5% |
| 4930572D21Rik | 0          | 0.00 |        |
| 4930572J05Rik | 18.47724   | 1.33 | 7.2%   |
| 4930572O03Rik | 0          | 0.00 |        |
| 4930573I19Rik | 4.9687     | 0.14 | 2.7%   |
| 4930578C19Rik | 0          | 0.00 |        |
| 4930578G10Rik | 0.05515294 | 0.03 | 49.5%  |
| 4930578I06Rik | 0          | 0.00 |        |
| 4930578N16Rik | 0.3880006  | 0.10 | 25.3%  |
| 4930579C12Rik | 0.00542346 | 0.01 | 145.6% |
| 4930579C15Rik | 0.03071548 | 0.03 | 107.9% |

|               |             |      |        |
|---------------|-------------|------|--------|
| 4930579E17Rik | 1.269964    | 0.11 | 8.9%   |
| 4930579G22Rik | 0.20395616  | 0.12 | 57.5%  |
| 4930579G24Rik | 0.7910576   | 0.08 | 9.7%   |
| 4930579J09Rik | 0.14324188  | 0.05 | 33.8%  |
| 4930583H14Rik | 1.038506    | 0.48 | 46.0%  |
| 4930588N13Rik | 0.16172896  | 0.08 | 51.2%  |
| 4930589M24Rik | 6.331036    | 0.26 | 4.1%   |
| 4930590J08Rik | 0.04327564  | 0.01 | 34.6%  |
| 4930595M18Rik | 0.0037273   | 0.01 | 223.6% |
| 4930596D02Rik | 0           | 0.00 |        |
| 4931403E03Rik | 0.3348544   | 0.03 | 8.3%   |
| 4931406B18Rik | 0           | 0.00 |        |
| 4931406C07Rik | 4.971348    | 2.23 | 44.9%  |
| 4931406H21Rik | 0.00301308  | 0.00 | 137.3% |
| 4931406I20Rik | 32.16608    | 1.90 | 5.9%   |
| 4931406P16Rik | 9.945804    | 0.32 | 3.2%   |
| 4931407G18Rik | 0           | 0.00 |        |
| 4931408A02Rik | 0.1067853   | 0.04 | 41.4%  |
| 4931408C20Rik | 0           | 0.00 |        |
| 4931409K22Rik | 0           | 0.00 |        |
| 4931414P19Rik | 1.017215    | 0.19 | 19.1%  |
| 4931417E11Rik | 0.02684204  | 0.03 | 102.4% |
| 4931417G12Rik | 0.00391688  | 0.01 | 223.6% |
| 4931423N10Rik | 0.03102212  | 0.01 | 40.4%  |
| 4931428F04Rik | 19.34726    | 3.46 | 17.9%  |
| 4931428L18Rik | 0           | 0.00 |        |
| 4931429I11Rik | 0.12700752  | 0.04 | 28.7%  |
| 4931432M23Rik | 0.00406084  | 0.01 | 223.6% |
| 4931433A01Rik | 3.766846    | 0.50 | 13.2%  |
| 4931440B09Rik | 0.03116418  | 0.02 | 73.8%  |
| 4931440F15Rik | 0.238085    | 0.03 | 12.3%  |
| 4931440L10Rik | 0.0123694   | 0.02 | 142.7% |
| 4932409I22Rik | 1.243354    | 0.05 | 4.1%   |
| 4932411E22Rik | 0.1772622   | 0.03 | 16.0%  |
| 4932411G14Rik | 0.009784852 | 0.01 | 122.9% |
| 4932411N23Rik | 0.01771748  | 0.01 | 56.6%  |
| 4932412H11Rik | 0.03713022  | 0.01 | 14.9%  |
| 4932413O14Rik | 0.2367212   | 0.05 | 20.6%  |
| 4932414N04Rik | 0.00745982  | 0.01 | 96.4%  |
| 4932415G16Rik | 0           | 0.00 |        |
| 4932415M13Rik | 0           | 0.00 |        |
| 4932416N17Rik | 6.17641     | 0.49 | 8.0%   |
| 4932417H02Rik | 10.63856    | 0.28 | 2.7%   |
| 4932417I16Rik | 6.743816    | 0.22 | 3.3%   |
| 4932418E24Rik | 0.003469298 | 0.00 | 142.0% |
| 4932425I24Rik | 0.12344816  | 0.05 | 37.3%  |
| 4932429P05Rik | 0           | 0.00 |        |

|               |            |      |        |
|---------------|------------|------|--------|
| 4932431H17Rik | 0.6987756  | 0.13 | 19.2%  |
| 4932432K03Rik | 9.022852   | 0.64 | 7.1%   |
| 4932438A13Rik | 11.4959    | 0.46 | 4.0%   |
| 4932438H23Rik | 0.02919768 | 0.01 | 44.2%  |
| 4932441B19Rik | 0          | 0.00 |        |
| 4932441K18Rik | 6.06243    | 0.91 | 15.0%  |
| 4932442K08Rik | 18.74594   | 0.77 | 4.1%   |
| 4932442L08Rik | 0.02693836 | 0.02 | 66.0%  |
| 4932701A20Rik | 0          | 0.00 |        |
| 4932702K14Rik | 0.0238676  | 0.01 | 32.4%  |
| 4933400A11Rik | 0          | 0.00 |        |
| 4933400C05Rik | 0.2681042  | 0.10 | 38.5%  |
| 4933400E14Rik | 0.0093398  | 0.01 | 96.7%  |
| 4933401B01Rik | 0.04387264 | 0.05 | 107.2% |
| 4933401F05Rik | 0.00755658 | 0.02 | 223.6% |
| 4933402E13Rik | 0.0228144  | 0.02 | 105.5% |
| 4933402J07Rik | 0          | 0.00 |        |
| 4933402N03Rik | 0          | 0.00 |        |
| 4933402N22Rik | 0          | 0.00 |        |
| 4933402P03Rik | 0.01146342 | 0.01 | 93.3%  |
| 4933403F05Rik | 4.920004   | 0.34 | 6.8%   |
| 4933403G14Rik | 1.0590416  | 0.07 | 6.2%   |
| 4933403O08Rik | 0.2274914  | 0.09 | 41.5%  |
| 4933404M02Rik | 0.08379428 | 0.03 | 30.9%  |
| 4933404M19Rik | 0.33812    | 0.06 | 18.7%  |
| 4933405L10Rik | 0.1557239  | 0.04 | 28.4%  |
| 4933405O20Rik | 0          | 0.00 |        |
| 4933406E20Rik | 18.62592   | 1.03 | 5.5%   |
| 4933406M09Rik | 0          | 0.00 |        |
| 4933407C03Rik | 76.00356   | 2.41 | 3.2%   |
| 4933407H18Rik | 1.87381    | 0.23 | 12.0%  |
| 4933407I18Rik | 0          | 0.00 |        |
| 4933407N01Rik | 15.4443    | 0.93 | 6.0%   |
| 4933407P14Rik | 0.00270932 | 0.01 | 223.6% |
| 4933408B17Rik | 0.08052108 | 0.05 | 66.5%  |
| 4933409G03Rik | 0          | 0.00 |        |
| 4933409K07Rik | 0          | 0.00 |        |
| 4933411G11Rik | 0          | 0.00 |        |
| 4933411K16Rik | 0.01754696 | 0.03 | 172.1% |
| 4933411K20Rik | 9.37112    | 0.45 | 4.8%   |
| 4933412E14Rik | 0.2380188  | 0.05 | 20.6%  |
| 4933413G19Rik | 0.01425162 | 0.02 | 137.9% |
| 4933413N12Rik | 0.03740348 | 0.02 | 63.6%  |
| 4933415F23Rik | 0.00376624 | 0.01 | 223.6% |
| 4933416C03Rik | 0          | 0.00 |        |
| 4933417A18Rik | 0          | 0.00 |        |
| 4933417O08Rik | 52.15176   | 4.46 | 8.5%   |

|               |            |       |        |
|---------------|------------|-------|--------|
| 4933421B21Rik | 0.3856294  | 0.09  | 23.4%  |
| 4933421E11Rik | 7.635854   | 0.19  | 2.5%   |
| 4933421I07Rik | 0          | 0.00  |        |
| 4933422H20Rik | 0          | 0.00  |        |
| 4933424A20Rik | 1.978928   | 0.63  | 31.6%  |
| 4933424B01Rik | 3.77154    | 0.19  | 5.0%   |
| 4933424C13Rik | 0.12039308 | 0.04  | 36.5%  |
| 4933425B16Rik | 0.05005998 | 0.04  | 72.5%  |
| 4933425K02Rik | 0.03195952 | 0.01  | 27.8%  |
| 4933425L03Rik | 9.191384   | 0.46  | 5.1%   |
| 4933425L06Rik | 0.0071209  | 0.01  | 138.6% |
| 4933425M15Rik | 0          | 0.00  |        |
| 4933425O20Rik | 0.08991442 | 0.07  | 82.8%  |
| 4933426I21Rik | 1.156104   | 0.13  | 11.1%  |
| 4933426K21Rik | 25.18204   | 3.34  | 13.2%  |
| 4933426M11Rik | 5.919308   | 0.39  | 6.6%   |
| 4933427D06Rik | 0.00852566 | 0.01  | 93.5%  |
| 4933427D14Rik | 3.127044   | 0.28  | 8.9%   |
| 4933427G17Rik | 0.01437562 | 0.02  | 155.9% |
| 4933428G09Rik | 1.754552   | 0.30  | 17.2%  |
| 4933428G20Rik | 9.241744   | 0.20  | 2.1%   |
| 4933429F08Rik | 0.11292506 | 0.03  | 26.7%  |
| 4933430H15Rik | 0.09700486 | 0.03  | 26.4%  |
| 4933430I17Rik | 0.1471064  | 0.02  | 12.4%  |
| 4933432B09Rik | 0.7751998  | 0.16  | 20.2%  |
| 4933433C11Rik | 0.02804314 | 0.03  | 107.4% |
| 4933433K01Rik | 0.6282414  | 0.19  | 30.1%  |
| 4933433P14Rik | 6.510596   | 0.55  | 8.5%   |
| 4933434E20Rik | 15.5588    | 1.04  | 6.7%   |
| 4933434I06Rik | 0.148803   | 0.05  | 33.4%  |
| 4933434I20Rik | 0.01266624 | 0.03  | 223.6% |
| 4933436I01Rik | 0          | 0.00  |        |
| 4933437F05Rik | 0.512239   | 0.15  | 28.6%  |
| 4933437K13Rik | 4.066656   | 0.47  | 11.6%  |
| 4933439C20Rik | 187.2866   | 21.22 | 11.3%  |
| 4933439F11Rik | 0.1529081  | 0.06  | 42.5%  |
| 4933439F18Rik | 13.00752   | 0.55  | 4.2%   |
| 4933440H19Rik | 0.4717792  | 0.12  | 25.1%  |
| 4F2_lc        | 0.259769   | 0.04  | 16.4%  |
| 5031408O05Rik | 0.00206512 | 0.00  | 223.6% |
| 5031410I06Rik | 0.10404244 | 0.03  | 28.4%  |
| 5031414D18Rik | 0.05258492 | 0.02  | 29.5%  |
| 5031439G07Rik | 20.38874   | 0.87  | 4.3%   |
| 5033411D12Rik | 0.6102254  | 0.36  | 59.5%  |
| 5033413D22Rik | 0.05234174 | 0.01  | 22.1%  |
| 5033414D02Rik | 7.614826   | 0.90  | 11.8%  |
| 5033414K04Rik | 22.66764   | 2.09  | 9.2%   |

|               |            |      |        |
|---------------|------------|------|--------|
| 5033428A16Rik | 8.968984   | 0.79 | 8.8%   |
| 5133400G04Rik | 1.224182   | 0.22 | 18.2%  |
| 5133401N09Rik | 7.60798    | 0.31 | 4.1%   |
| 5230400G24Rik | 95.48286   | 5.32 | 5.6%   |
| 5330401P04Rik | 0.3155614  | 0.08 | 25.9%  |
| 5330417C22Rik | 2.085428   | 0.25 | 12.0%  |
| 5330421F07Rik | 0.4424624  | 0.06 | 14.3%  |
| 5330429B09Rik | 2.00157    | 0.53 | 26.7%  |
| 5330431N19Rik | 27.32726   | 2.50 | 9.1%   |
| 5330437I02Rik | 0.07664282 | 0.03 | 40.0%  |
| 5330439B14Rik | 0.00210314 | 0.00 | 177.5% |
| 5330439C02Rik | 0.02850014 | 0.03 | 94.5%  |
| 53BP1         | 0.5669048  | 0.29 | 50.9%  |
| 5430401F13Rik | 0          | 0.00 |        |
| 5430402E10Rik | 0          | 0.00 |        |
| 5430405G05Rik | 3.51372    | 0.50 | 14.4%  |
| 5430407P10Rik | 0.4314702  | 0.07 | 16.4%  |
| 5430411K18Rik | 5.543922   | 0.38 | 6.8%   |
| 5430413K10Rik | 0          | 0.00 |        |
| 5430416O09Rik | 0          | 0.00 |        |
| 5430419D17Rik | 0          | 0.00 |        |
| 5430420C16Rik | 0.01130776 | 0.03 | 223.6% |
| 5430421N21Rik | 0          | 0.00 |        |
| 5430427O19Rik | 0.03271764 | 0.03 | 78.6%  |
| 5430432M24Rik | 1.747132   | 0.06 | 3.7%   |
| 5430432N15Rik | 0.2662214  | 0.05 | 18.0%  |
| 5430433E21Rik | 0.01831358 | 0.01 | 66.9%  |
| 5430435G22Rik | 0.02581696 | 0.02 | 65.5%  |
| 5430437P03Rik | 24.62556   | 1.12 | 4.6%   |
| 5530400B04Rik | 0.00430024 | 0.01 | 137.9% |
| 5530400C23Rik | 0          | 0.00 |        |
| 5630401D24Rik | 2.1331     | 0.24 | 11.1%  |
| 5630401J11Rik | 0.8496848  | 0.13 | 14.9%  |
| 5730403B10Rik | 57.57106   | 0.64 | 1.1%   |
| 5730403M16Rik | 3.175      | 0.25 | 7.7%   |
| 5730407K14Rik | 8.110286   | 0.46 | 5.7%   |
| 5730409E04Rik | 17.47364   | 0.49 | 2.8%   |
| 5730409E15Rik | 0.04663564 | 0.01 | 26.9%  |
| 5730409G15Rik | 0.8991408  | 0.20 | 22.4%  |
| 5730410E15Rik | 33.2247    | 2.28 | 6.9%   |
| 5730410I19Rik | 10.083652  | 0.80 | 8.0%   |
| 5730419I09Rik | 0.5401416  | 0.17 | 31.8%  |
| 5730427N09Rik | 2.888678   | 0.16 | 5.5%   |
| 5730437N04Rik | 40.74642   | 3.22 | 7.9%   |
| 5730442P18Rik | 0.21493914 | 0.14 | 66.8%  |
| 5730446C15Rik | 36.13834   | 1.06 | 2.9%   |
| 5730449L18Rik | 3.9042     | 0.55 | 14.2%  |

|               |            |      |        |
|---------------|------------|------|--------|
| 5730453I16Rik | 22.82416   | 0.94 | 4.1%   |
| 5730455O13Rik | 7.586228   | 0.97 | 12.8%  |
| 5730455P16Rik | 31.63042   | 2.04 | 6.5%   |
| 5730469M10Rik | 20.98668   | 1.51 | 7.2%   |
| 5730470L24Rik | 10.66392   | 0.41 | 3.9%   |
| 5730472N09Rik | 23.33428   | 0.67 | 2.9%   |
| 5730494M16Rik | 20.30702   | 2.30 | 11.3%  |
| 5730494N06Rik | 7.53235    | 0.47 | 6.2%   |
| 5730507A09Rik | 6.223468   | 0.16 | 2.6%   |
| 5730507C01Rik | 0.00948162 | 0.02 | 223.6% |
| 5730508B09Rik | 0.3657844  | 0.21 | 58.5%  |
| 5730509K17Rik | 3.363684   | 0.46 | 13.6%  |
| 5730528L13Rik | 6.157604   | 0.56 | 9.1%   |
| 5730536A07Rik | 7.533564   | 0.45 | 5.9%   |
| 5730557B15Rik | 0.2812794  | 0.05 | 19.1%  |
| 5730559C18Rik | 0.2842334  | 0.05 | 16.8%  |
| 5730577I03Rik | 1.228554   | 0.15 | 12.5%  |
| 5730590G19Rik | 0.1380982  | 0.02 | 16.6%  |
| 5730593F17Rik | 0.6016426  | 0.16 | 26.0%  |
| 5730596K20Rik | 5.541086   | 0.47 | 8.5%   |
| 5730601F06Rik | 7.323388   | 0.70 | 9.5%   |
| 5830403L16Rik | 0.1231856  | 0.02 | 12.8%  |
| 5830404H04Rik | 7.212844   | 0.33 | 4.6%   |
| 5830405F06Rik | 0          | 0.00 |        |
| 5830405N20Rik | 0.00362072 | 0.01 | 223.6% |
| 5830406J20Rik | 0.02286652 | 0.02 | 93.1%  |
| 5830411E10Rik | 0.15243472 | 0.04 | 28.8%  |
| 5830411N06Rik | 0          | 0.00 |        |
| 5830415F09Rik | 1.1298754  | 0.21 | 19.0%  |
| 5830415L20Rik | 7.026236   | 0.45 | 6.4%   |
| 5830416A07Rik | 4.854534   | 0.29 | 5.9%   |
| 5830417C01Rik | 6.071134   | 0.22 | 3.6%   |
| 5830417I10Rik | 1.495846   | 0.21 | 14.3%  |
| 5830418K08Rik | 4.739304   | 1.59 | 33.6%  |
| 5830427D03Rik | 0.02818092 | 0.02 | 71.6%  |
| 5830433M19Rik | 2.49379    | 0.18 | 7.4%   |
| 5830434P21Rik | 9.782226   | 2.24 | 22.9%  |
| 5830443L24Rik | 0.03891704 | 0.01 | 23.6%  |
| 5830445C04Rik | 0.2852446  | 0.04 | 15.7%  |
| 5830457O10Rik | 13.08156   | 0.75 | 5.7%   |
| 5830467P10Rik | 0.09860804 | 0.05 | 51.6%  |
| 5830472H07Rik | 0.11826384 | 0.08 | 66.7%  |
| 5830472M02Rik | 11.7694    | 0.32 | 2.7%   |
| 5830482F20Rik | 0.07696776 | 0.04 | 57.3%  |
| 5830483C08Rik | 0.4222656  | 0.04 | 9.0%   |
| 5830484A20Rik | 0          | 0.00 |        |
| 5930403L14Rik | 0.2008874  | 0.05 | 23.7%  |

|               |            |      |        |
|---------------|------------|------|--------|
| 5930416I19Rik | 5.297188   | 0.41 | 7.8%   |
| 5930434B04Rik | 30.7399    | 1.34 | 4.4%   |
| 6030405A18Rik | 2.74822    | 0.44 | 16.2%  |
| 6030408B16Rik | 0.07319756 | 0.05 | 62.2%  |
| 6030408C04Rik | 1.503068   | 0.15 | 9.7%   |
| 6030419C18Rik | 20.9265    | 1.78 | 8.5%   |
| 6030422M01Rik | 0.09018762 | 0.04 | 39.6%  |
| 6030422M02Rik | 0.00261366 | 0.01 | 223.6% |
| 6030429G01Rik | 0.11514462 | 0.04 | 32.6%  |
| 6030436E02Rik | 4.006972   | 0.66 | 16.6%  |
| 6030441H18Rik | 1.0413162  | 0.12 | 11.8%  |
| 6030443O07Rik | 13.59284   | 1.02 | 7.5%   |
| 6030446N20Rik | 2.287006   | 0.24 | 10.4%  |
| 6030458C11Rik | 12.0727    | 0.76 | 6.3%   |
| 6030465E24Rik | 3.479902   | 0.42 | 12.1%  |
| 6030490I01Rik | 6.256616   | 0.40 | 6.4%   |
| 6030498E09Rik | 0.01571336 | 0.02 | 137.0% |
| 6130401L20Rik | 1.334034   | 0.10 | 7.6%   |
| 6230405M12Rik | 3.614916   | 0.90 | 25.0%  |
| 6230409E13Rik | 13.38222   | 1.61 | 12.0%  |
| 6230410P16Rik | 0.3898926  | 0.03 | 7.7%   |
| 6230416J20Rik | 1.514164   | 0.07 | 4.9%   |
| 6230424H07Rik | 0.5926432  | 0.04 | 6.9%   |
| 6230427J02Rik | 1.0449202  | 0.22 | 21.3%  |
| 6330403A02Rik | 7.707802   | 0.86 | 11.1%  |
| 6330403K07Rik | 18.19514   | 1.74 | 9.5%   |
| 6330406I15Rik | 0.2477728  | 0.09 | 34.6%  |
| 6330407G11Rik | 15.20946   | 1.64 | 10.8%  |
| 6330407J23Rik | 20.555     | 1.47 | 7.2%   |
| 6330408A02Rik | 2.493706   | 0.24 | 9.8%   |
| 6330409N04Rik | 20.9526    | 1.70 | 8.1%   |
| 6330416G13Rik | 2.039282   | 0.22 | 10.7%  |
| 6330416L07Rik | 2.81312    | 0.33 | 11.7%  |
| 6330417G02Rik | 3.105242   | 0.33 | 10.6%  |
| 6330419J24Rik | 21.27292   | 1.01 | 4.7%   |
| 6330439K17Rik | 80.03024   | 5.45 | 6.8%   |
| 6330442E10Rik | 31.91406   | 2.54 | 7.9%   |
| 6330500D04Rik | 6.160942   | 0.31 | 5.1%   |
| 6330503C03Rik | 24.37046   | 0.86 | 3.5%   |
| 6330503K22Rik | 10.128314  | 0.51 | 5.0%   |
| 6330505N24Rik | 3.177562   | 0.23 | 7.2%   |
| 6330512M04Rik | 6.718628   | 0.91 | 13.6%  |
| 6330514A18Rik | 1.675626   | 0.15 | 9.0%   |
| 6330527O06Rik | 22.45688   | 1.43 | 6.4%   |
| 6330534C20Rik | 2.83017    | 0.17 | 6.1%   |
| 6330545A04Rik | 0.154736   | 0.04 | 26.1%  |
| 6330548G22Rik | 3.25127    | 0.26 | 8.1%   |



|               |             |      |       |
|---------------|-------------|------|-------|
| 6330569M22Rik | 24.87844    | 2.54 | 10.2% |
| 6330577E15Rik | 50.46518    | 1.50 | 3.0%  |
| 6330578E17Rik | 26.68248    | 1.12 | 4.2%  |
| 6332401O19Rik | 8.614232    | 0.74 | 8.6%  |
| 6430502M16Rik | 10.288438   | 0.63 | 6.1%  |
| 6430510M02Rik | 6.78033     | 0.96 | 14.2% |
| 6430514L14Rik | 4.309782    | 0.36 | 8.4%  |
| 6430517E21Rik | 17.67592    | 0.86 | 4.9%  |
| 6430526N21Rik | 5.167972    | 0.24 | 4.6%  |
| 6430527G18Rik | 13.05168    | 0.86 | 6.6%  |
| 6430531B16Rik | 0.06734326  | 0.03 | 46.6% |
| 6430537H07Rik | 0.433477    | 0.06 | 13.7% |
| 6430548M08Rik | 32.30456    | 0.93 | 2.9%  |
| 6430550H21Rik | 50.3196     | 2.86 | 5.7%  |
| 6430571L13Rik | 2.444242    | 0.39 | 15.9% |
| 6430573F11Rik | 0.8808318   | 0.47 | 53.3% |
| 6430598A04Rik | 22.36196    | 1.10 | 4.9%  |
| 6430604K15Rik | 1.125394    | 0.10 | 9.0%  |
| 6430701C03Rik | 0.4512992   | 0.08 | 16.9% |
| 6430704M03Rik | 15.97652    | 1.01 | 6.3%  |
| 6430706D22Rik | 4.30768     | 0.55 | 12.7% |
| 6530401C20Rik | 0.2273482   | 0.07 | 29.3% |
| 6530401N04Rik | 5.603064    | 0.41 | 7.3%  |
| 6530403A03Rik | 7.544628    | 0.56 | 7.4%  |
| 6530404N21Rik | 0.7295136   | 0.15 | 19.9% |
| 6530418L21Rik | 4.986306    | 0.36 | 7.2%  |
| 6620401K05Rik | 5.151018    | 0.24 | 4.8%  |
| 6620401M08Rik | 7.991258    | 1.51 | 18.8% |
| 6720456B07Rik | 56.63664    | 4.56 | 8.0%  |
| 6720456H20Rik | 2.007722    | 0.12 | 5.8%  |
| 6720457D02Rik | 2.439196    | 0.35 | 14.3% |
| 6720458F09Rik | 3.819556    | 0.58 | 15.1% |
| 6720460F02Rik | 0.7415178   | 0.12 | 16.5% |
| 6720463M24Rik | 0.5200918   | 0.06 | 11.3% |
| 6720467C03Rik | 27.08516    | 0.84 | 3.1%  |
| 6820408C15Rik | 0.09032438  | 0.02 | 18.2% |
| 6820424L24Rik | 4.172708    | 0.33 | 7.8%  |
| 6820431F20Rik | 30.21146    | 1.28 | 4.3%  |
| 6D            | 0           | 0.00 |       |
| 6M21          | 0           | 0.00 |       |
| 7420416P09Rik | 0.007966564 | 0.01 | 97.0% |
| 7420426K07Rik | 0           | 0.00 |       |
| 7530404M11Rik | 0.011288798 | 0.01 | 71.9% |
| 8030411F24Rik | 0           | 0.00 |       |
| 8030451F13Rik | 0.017950818 | 0.01 | 56.6% |
| 8030451K01Rik | 2.013934    | 0.21 | 10.3% |
| 8030462N17Rik | 6.88521     | 0.51 | 7.4%  |

|               |             |      |        |
|---------------|-------------|------|--------|
| 8030466012Rik | 0.10206724  | 0.03 | 29.3%  |
| 8030491N06Rik | 0.6940612   | 0.06 | 9.3%   |
| 8230402K04Rik | 0.01449436  | 0.01 | 99.7%  |
| 8430406I07Rik | 1.2389082   | 0.16 | 13.0%  |
| 8430408G22Rik | 0.21421812  | 0.12 | 55.3%  |
| 8430410A17Rik | 5.823682    | 0.56 | 9.6%   |
| 8430410K20Rik | 21.50202    | 0.38 | 1.8%   |
| 8430415E04Rik | 5.94478     | 0.36 | 6.0%   |
| 8430416H19Rik | 0.04804588  | 0.03 | 72.7%  |
| 8430419L09Rik | 23.88012    | 1.06 | 4.4%   |
| 8430426H19Rik | 0.9468424   | 0.36 | 38.4%  |
| 8430427H17Rik | 6.838954    | 0.72 | 10.6%  |
| 9030025P20Rik | 7.62029     | 1.59 | 20.9%  |
| 9030205A07Rik | 5.01341     | 0.13 | 2.7%   |
| 9030224M15Rik | 0.05305506  | 0.04 | 75.9%  |
| 9030409G11Rik | 14.20394    | 1.47 | 10.4%  |
| 9030416H16Rik | 0.67540734  | 0.83 | 122.9% |
| 9030418K01Rik | 8.767552    | 0.81 | 9.2%   |
| 9030421J09Rik | 0           | 0.00 |        |
| 9030425E11Rik | 9.44958     | 0.26 | 2.7%   |
| 9030605I04Rik | 0.026527366 | 0.03 | 101.7% |
| 9030607L17Rik | 5.136216    | 0.60 | 11.7%  |
| 9030611O19Rik | 0.02674704  | 0.02 | 57.3%  |
| 9030612M13Rik | 12.99498    | 0.74 | 5.7%   |
| 9030617O03Rik | 0.6607558   | 0.12 | 17.8%  |
| 9030619P08Rik | 0           | 0.00 |        |
| 9030624G23Rik | 0.9292728   | 0.12 | 12.6%  |
| 9030624J02Rik | 20.8764     | 0.68 | 3.2%   |
| 9030625A04Rik | 0.6410742   | 0.09 | 13.5%  |
| 9130005N14Rik | 2.155438    | 0.47 | 21.7%  |
| 9130008F23Rik | 0.04860964  | 0.01 | 30.1%  |
| 9130011E15Rik | 12.425      | 0.61 | 4.9%   |
| 9130011J15Rik | 24.49718    | 1.41 | 5.7%   |
| 9130014G24Rik | 0           | 0.00 |        |
| 9130017C17Rik | 0.10903286  | 0.03 | 23.4%  |
| 9130017N09Rik | 0.03827756  | 0.02 | 48.3%  |
| 9130019O22Rik | 0.4423836   | 0.09 | 20.6%  |
| 9130023D20Rik | 3.633062    | 0.38 | 10.6%  |
| 9130023H24Rik | 1.20495     | 0.16 | 13.0%  |
| 9130206N08Rik | 12.4352     | 0.48 | 3.8%   |
| 9130211I03Rik | 0.4228398   | 0.22 | 52.2%  |
| 9130213B05Rik | 9.457196    | 0.23 | 2.5%   |
| 9130218O11Rik | 0.00519282  | 0.01 | 223.6% |
| 9130221D24Rik | 0           | 0.00 |        |
| 9130221H12Rik | 1.757266    | 0.22 | 12.6%  |
| 9130227C08Rik | 3.198266    | 0.35 | 10.9%  |
| 9130401M01Rik | 11.00728    | 0.51 | 4.6%   |

|               |             |      |        |
|---------------|-------------|------|--------|
| 9130404D08Rik | 18.50016    | 1.11 | 6.0%   |
| 9130404D14Rik | 5.414408    | 0.46 | 8.5%   |
| 9130404H23Rik | 0           | 0.00 |        |
| 9130409I23Rik | 0.0058821   | 0.01 | 223.6% |
| 9130416B15    | 0           | 0.00 |        |
| 9230019H11Rik | 0           | 0.00 |        |
| 9230104L09Rik | 0.12537358  | 0.15 | 122.6% |
| 9230105E10Rik | 0.1561146   | 0.04 | 24.1%  |
| 9230107M04Rik | 0           | 0.00 |        |
| 9230109A22Rik | 0.00430008  | 0.01 | 223.6% |
| 9230110C19Rik | 3.362756    | 0.23 | 6.7%   |
| 9230112D13Rik | 0           | 0.00 |        |
| 9230116B18Rik | 0.9374302   | 0.27 | 29.2%  |
| 9330101J02Rik | 1.334356    | 0.08 | 6.0%   |
| 9330128J19Rik | 2.627956    | 0.24 | 9.1%   |
| 9330129D05Rik | 0.6088828   | 0.04 | 6.8%   |
| 9330134C04Rik | 3.262522    | 0.20 | 6.2%   |
| 9330155M09Rik | 0.01336952  | 0.01 | 93.5%  |
| 9330158F14Rik | 0.006431    | 0.01 | 223.6% |
| 9330176C04Rik | 0.1993658   | 0.05 | 25.6%  |
| 9330182L06Rik | 14.02092    | 0.44 | 3.2%   |
| 9430007A20Rik | 0           | 0.00 |        |
| 9430010O03Rik | 21.93472    | 1.36 | 6.2%   |
| 9430015G10Rik | 5.792038    | 0.40 | 6.8%   |
| 9430016H08Rik | 5.538524    | 0.24 | 4.4%   |
| 9430020K01Rik | 2.614628    | 0.26 | 9.9%   |
| 9430022F06Rik | 0.00320218  | 0.01 | 223.6% |
| 9430023L20Rik | 14.14152    | 0.48 | 3.4%   |
| 9430028L06Rik | 1.506242    | 0.12 | 8.2%   |
| 9430031J16Rik | 2.743794    | 0.06 | 2.0%   |
| 9430038I01Rik | 0.3818206   | 0.09 | 22.4%  |
| 9430057O19Rik | 0.465962    | 0.18 | 38.1%  |
| 9430067K14Rik | 3.647678    | 0.25 | 6.8%   |
| 9430069I07Rik | 0.01179612  | 0.03 | 223.6% |
| 9430069J07Rik | 8.435932    | 0.24 | 2.9%   |
| 9430070O13Rik | 0.01718982  | 0.01 | 63.8%  |
| 9430076C15Rik | 0.013649282 | 0.03 | 194.8% |
| 9530002B09Rik | 0           | 0.00 |        |
| 9530003J23Rik | 0.0076999   | 0.02 | 223.6% |
| 9530008L14Rik | 0.00404006  | 0.01 | 223.6% |
| 9530015I07Rik | 0.07133444  | 0.01 | 19.5%  |
| 9530048O09Rik | 1.0229518   | 0.14 | 13.6%  |
| 9530053A07Rik | 0           | 0.00 |        |
| 9530058B02Rik | 5.235914    | 0.73 | 14.0%  |
| 9530066K23Rik | 0.02500054  | 0.02 | 63.0%  |
| 9530068E07Rik | 47.20682    | 1.36 | 2.9%   |
| 9530077C05Rik | 2.81941     | 0.16 | 5.8%   |

|               |             |      |        |
|---------------|-------------|------|--------|
| 9530091C08Rik | 0.00239268  | 0.01 | 223.6% |
| 9530096D07Rik | 0.7840232   | 0.20 | 25.7%  |
| 9530098N22Rik | 0           | 0.00 |        |
| 9630008K15Rik | 0.5884682   | 0.14 | 24.2%  |
| 9630014M24Rik | 0.6164676   | 0.08 | 12.6%  |
| 9630025I21Rik | 2.696412    | 0.22 | 8.0%   |
| 9630028B13Rik | 0.0635019   | 0.03 | 55.0%  |
| 9630031F12Rik | 5.295526    | 0.98 | 18.5%  |
| 9630033F20Rik | 5.757086    | 0.36 | 6.3%   |
| 9630041N07Rik | 0.6966144   | 0.08 | 11.5%  |
| 9630046K23Rik | 7.731484    | 0.93 | 12.1%  |
| 9630050M13Rik | 14.59978    | 0.95 | 6.5%   |
| 9630055N22Rik | 1.3015682   | 0.64 | 49.2%  |
| 9630058J23Rik | 9.491292    | 0.25 | 2.6%   |
| 9830102E05Rik | 0.00384512  | 0.01 | 223.6% |
| 9830107B12Rik | 0           | 0.00 |        |
| 9830123M21Rik | 0.02898646  | 0.01 | 36.2%  |
| 9830124H08Rik | 3.304752    | 0.49 | 14.8%  |
| 9830130M13Rik | 0.0064496   | 0.01 | 137.8% |
| 9830134C10Rik | 0.001049026 | 0.00 | 223.6% |
| 9830163H01Rik | 0.07484558  | 0.05 | 61.5%  |
| 9830169C18Rik | 3.737518    | 0.15 | 4.0%   |
| 9930012K11Rik | 0.6013894   | 0.14 | 24.0%  |
| 9930013L23Rik | 2.886358    | 0.49 | 16.9%  |
| 9930021D14Rik | 1.76120894  | 1.58 | 89.9%  |
| 9930021J03Rik | 10.93878    | 0.57 | 5.2%   |
| 9930021J17Rik | 0.1677872   | 0.07 | 39.6%  |
| 9930022D16Rik | 0.00251174  | 0.01 | 223.6% |
| 9930022N03Rik | 0.00546622  | 0.01 | 223.6% |
| 9930023K05Rik | 0.04564856  | 0.03 | 57.2%  |
| 9930032O22Rik | 0           | 0.00 |        |
| 9930039A11Rik | 0.001877058 | 0.00 | 223.6% |
| 9930104L06Rik | 3.894052    | 0.25 | 6.4%   |
| 9930109F21Rik | 0.00317352  | 0.01 | 223.6% |
| 9930111J21Rik | 0           | 0.00 |        |
| a             | 0.30257518  | 0.44 | 143.9% |
| A030001H23Rik | 0           | 0.00 |        |
| A030004J04Rik | 0           | 0.00 |        |
| A030007L17Rik | 5.797386    | 0.39 | 6.7%   |
| A030009A09Rik | 0           | 0.00 |        |
| A030009H04Rik | 59.21644    | 0.53 | 0.9%   |
| A030010K20Rik | 0           | 0.00 |        |
| A030013N09Rik | 0           | 0.00 |        |
| A130010J15Rik | 1.590646    | 0.10 | 6.5%   |
| A130022J15Rik | 2.62772     | 0.30 | 11.5%  |
| A130023I24Rik | 0           | 0.00 |        |
| A130042E20Rik | 1.20378     | 0.12 | 9.7%   |

|               |             |      |        |
|---------------|-------------|------|--------|
| A130090K04Rik | 0.215635516 | 0.13 | 58.3%  |
| A130092J06Rik | 0.4615596   | 0.14 | 30.3%  |
| A1bg          | 0           | 0.00 |        |
| A230046K03Rik | 10.408966   | 0.75 | 7.2%   |
| A230050P20Rik | 20.93298    | 1.00 | 4.8%   |
| A230051G13Rik | 1.907598    | 0.10 | 5.3%   |
| A230054D04Rik | 11.41852    | 0.69 | 6.0%   |
| A230062G08Rik | 2.513618    | 0.12 | 4.7%   |
| A230067G21Rik | 0.638739    | 0.35 | 55.6%  |
| A230069A22Rik | 0.23095596  | 0.12 | 52.2%  |
| A230074B11Rik | 0.00925302  | 0.01 | 140.3% |
| A230078I05Rik | 8.978374    | 0.76 | 8.4%   |
| A230079K17Rik | 0           | 0.00 |        |
| A230083G16Rik | 0.7993336   | 0.17 | 21.7%  |
| A230083H22Rik | 28.15664    | 1.66 | 5.9%   |
| A230097K15Rik | 3.0783      | 0.29 | 9.5%   |
| A230106M15Rik | 4.425432    | 0.33 | 7.5%   |
| A230106M20Rik | 43.69866    | 4.31 | 9.9%   |
| A230106N23Rik | 0.6549926   | 0.06 | 9.4%   |
| A230107C01Rik | 0.0514619   | 0.03 | 66.0%  |
| A2bp1         | 97.22112    | 2.62 | 2.7%   |
| A2m           | 2.548964    | 0.17 | 6.6%   |
| A330008L17Rik | 0.9281836   | 0.24 | 26.1%  |
| A330019N05Rik | 0.05279212  | 0.02 | 33.8%  |
| A330021E22Rik | 1.396444    | 0.09 | 6.3%   |
| A330049M08Rik | 0.4806444   | 0.12 | 24.3%  |
| A330070K13Rik | 0.2592876   | 0.06 | 23.3%  |
| A330102H22Rik | 2.140052    | 0.41 | 19.3%  |
| A330102K23Rik | 10.667948   | 1.04 | 9.8%   |
| A330104H05Rik | 0.01525578  | 0.01 | 60.7%  |
| A3galt2       | 0.09571574  | 0.05 | 48.0%  |
| A430005L14Rik | 4.048952    | 0.28 | 6.8%   |
| A430025D11Rik | 0           | 0.00 |        |
| A430033K04Rik | 3.221552    | 0.16 | 4.9%   |
| A430041B07Rik | 10.76842    | 0.38 | 3.5%   |
| A430060F13Rik | 0.0074476   | 0.01 | 93.8%  |
| A430065P19Rik | 0.013670792 | 0.01 | 78.5%  |
| A430078G23Rik | 0           | 0.00 |        |
| A430083B19Rik | 0           | 0.00 |        |
| A430084P05Rik | 0           | 0.00 |        |
| A430089I19Rik | 0           | 0.00 |        |
| A430090E18Rik | 0           | 0.00 |        |
| A430090L17Rik | 0.003913696 | 0.01 | 141.4% |
| A430093A21Rik | 1.269978    | 0.17 | 13.7%  |
| A430105I19Rik | 0.315335    | 0.06 | 18.3%  |
| A430106J12Rik | 0.3952724   | 0.16 | 39.9%  |
| A430107D22Rik | 0.001281094 | 0.00 | 223.6% |

|               |            |      |        |
|---------------|------------|------|--------|
| A430107O13Rik | 0.7502212  | 0.17 | 22.4%  |
| A430107P09Rik | 0          | 0.00 |        |
| A430110N23Rik | 0.1829186  | 0.05 | 26.4%  |
| A4galt        | 0.4089764  | 0.05 | 12.2%  |
| A4gnt         | 0          | 0.00 |        |
| A530016L24Rik | 0          | 0.00 |        |
| A530016O06Rik | 0.08827368 | 0.04 | 44.5%  |
| A530023O14Rik | 0.00246742 | 0.01 | 223.6% |
| A530032D15Rik | 0.008972   | 0.01 | 137.2% |
| A530050D06Rik | 0.08169848 | 0.01 | 17.6%  |
| A530053G22Rik | 0          | 0.00 |        |
| A530054K11Rik | 2.345092   | 0.20 | 8.4%   |
| A530057A03Rik | 0.7267102  | 0.06 | 8.9%   |
| A530064D06Rik | 0          | 0.00 |        |
| A530082C11Rik | 13.92428   | 0.29 | 2.1%   |
| A530088E08Rik | 0.00729452 | 0.01 | 137.0% |
| A530088H08Rik | 0.03940298 | 0.03 | 71.1%  |
| A530088I07Rik | 0.2144372  | 0.03 | 15.2%  |
| A530095I07Rik | 0          | 0.00 |        |
| A530098C11Rik | 0.0509196  | 0.03 | 60.5%  |
| A530099J19Rik | 0          | 0.00 |        |
| A630001G21Rik | 0.03322532 | 0.02 | 45.2%  |
| A630005I04Rik | 0.00217254 | 0.00 | 223.6% |
| A630007B06Rik | 14.95462   | 1.89 | 12.6%  |
| A630010A05Rik | 0          | 0.00 |        |
| A630012P03Rik | 0          | 0.00 |        |
| A630018P17Rik | 0.9323174  | 0.05 | 5.9%   |
| A630033E08Rik | 3.846922   | 0.16 | 4.1%   |
| A630033H20Rik | 0.03912512 | 0.05 | 116.6% |
| A630038E17Rik | 0.0805434  | 0.03 | 42.1%  |
| A630042L21Rik | 7.25251    | 0.24 | 3.3%   |
| A630047E20Rik | 4.911986   | 0.33 | 6.7%   |
| A630050E13Rik | 0.1404824  | 0.04 | 27.3%  |
| A630054L15Rik | 9.29374    | 0.54 | 5.8%   |
| A630055G03Rik | 0.12750104 | 0.08 | 61.1%  |
| A630072M18Rik | 1.0858606  | 0.12 | 11.0%  |
| A630077B13Rik | 0.02840666 | 0.04 | 140.0% |
| A630091E08Rik | 0          | 0.00 |        |
| A630095E13Rik | 0          | 0.00 |        |
| A630098G03Rik | 0          | 0.00 |        |
| A730008H23Rik | 0.5363292  | 0.23 | 43.2%  |
| A730008L03Rik | 1.345338   | 0.27 | 20.3%  |
| A730011L01Rik | 6.1842     | 0.09 | 1.4%   |
| A730017C20Rik | 16.37716   | 0.62 | 3.8%   |
| A730018C14Rik | 0          | 0.00 |        |
| A730020M07Rik | 0.0222635  | 0.04 | 166.6% |
| A730036I17Rik | 0.05346768 | 0.02 | 36.0%  |

|               |            |       |        |
|---------------|------------|-------|--------|
| A730037C10Rik | 0.20994558 | 0.12  | 56.7%  |
| A730055C05Rik | 0.2347186  | 0.10  | 44.3%  |
| A730069N07Rik | 0.4884952  | 0.16  | 33.4%  |
| A730085E03Rik | 0          | 0.00  |        |
| A730098D12Rik | 1.5555966  | 0.73  | 46.8%  |
| A830006F12Rik | 5.966988   | 0.24  | 4.1%   |
| A830007P12Rik | 0.2085218  | 0.05  | 25.6%  |
| A830008O07Rik | 3.32923    | 0.57  | 17.1%  |
| A830010M20Rik | 4.26228    | 2.48  | 58.3%  |
| A830018L16Rik | 7.36929    | 0.75  | 10.1%  |
| A830019P07Rik | 0.3452612  | 0.19  | 56.3%  |
| A830023I12Rik | 3.029192   | 0.44  | 14.6%  |
| A830036E02Rik | 0          | 0.00  |        |
| A830043J08Rik | 0.00908682 | 0.01  | 106.0% |
| A830053O21Rik | 0.106086   | 0.06  | 52.5%  |
| A830059I20Rik | 7.060902   | 0.69  | 9.8%   |
| A830073O21Rik | 9.58234    | 0.57  | 6.0%   |
| A830080D01Rik | 1.963774   | 0.16  | 8.4%   |
| A830091I15Rik | 10.743558  | 0.99  | 9.2%   |
| A830093I24Rik | 0.5699726  | 0.20  | 35.9%  |
| A930001M12Rik | 0.204505   | 0.04  | 20.6%  |
| A930001N09Rik | 4.292688   | 1.00  | 23.4%  |
| A930005I04Rik | 0.217016   | 0.02  | 9.4%   |
| A930006D11Rik | 0.03733738 | 0.02  | 60.1%  |
| A930008G19Rik | 1.65697    | 0.29  | 17.3%  |
| A930016P21Rik | 2.28914    | 0.26  | 11.5%  |
| A930017N06Rik | 4.369728   | 0.26  | 6.0%   |
| A930018P22Rik | 0.01419596 | 0.02  | 141.4% |
| A930021C24Rik | 0.1386522  | 0.04  | 27.1%  |
| A930021H16Rik | 2.275216   | 0.14  | 6.3%   |
| A930025D01Rik | 2.932604   | 0.36  | 12.4%  |
| A930028L21Rik | 0.22338536 | 0.14  | 61.7%  |
| A930034L06Rik | 321.1904   | 45.80 | 14.3%  |
| A930037G23Rik | 7.894552   | 0.30  | 3.8%   |
| A930038C07Rik | 4.232806   | 0.21  | 5.0%   |
| A930041I02Rik | 14.39102   | 1.46  | 10.2%  |
| AA388235      | 1.36535    | 0.16  | 11.5%  |
| AA407270      | 0.0836716  | 0.03  | 40.3%  |
| AA407659      | 0.07985504 | 0.05  | 63.5%  |
| AA408296      | 2.502504   | 0.29  | 11.6%  |
| AA409316      | 1.59048    | 0.09  | 5.7%   |
| AA415398      | 2.723924   | 0.25  | 9.4%   |
| AA467197      | 0.10474734 | 0.08  | 79.2%  |
| AA536717      | 8.773424   | 0.36  | 4.1%   |
| AA536749      | 23.5355    | 13.17 | 56.0%  |
| AA673488      | 8.118034   | 0.15  | 1.8%   |
| AA792892      | 0          | 0.00  |        |

|          |             |      |        |
|----------|-------------|------|--------|
| AA881470 | 5.17932     | 0.12 | 2.4%   |
| AA960436 | 3.393952    | 0.34 | 10.0%  |
| AA986860 | 0.7041584   | 0.11 | 16.1%  |
| AA987161 | 2.971696    | 0.11 | 3.8%   |
| Aaas     | 10.304776   | 1.15 | 11.2%  |
| Aacs     | 32.5143     | 4.76 | 14.6%  |
| Aadac    | 0           | 0.00 |        |
| Aadacl1  | 33.27572    | 2.30 | 6.9%   |
| Aadacl3  | 0           | 0.00 |        |
| Aadat    | 0.2172164   | 0.08 | 35.0%  |
| Aak1     | 33.54156    | 2.78 | 8.3%   |
| Aamp     | 66.39012    | 2.75 | 4.1%   |
| Aanat    | 0.07619144  | 0.03 | 42.9%  |
| Aard     | 3.372188    | 0.33 | 9.9%   |
| Aars     | 84.58456    | 9.57 | 11.3%  |
| Aars2    | 4.59588     | 0.40 | 8.8%   |
| Aarsd1   | 15.20714    | 1.47 | 9.7%   |
| Aarsl    | 0.4410396   | 0.13 | 29.6%  |
| Aasdhpt  | 14.14792    | 0.42 | 2.9%   |
| Aass     | 0.07825752  | 0.03 | 40.4%  |
| Aatf     | 10.182022   | 0.41 | 4.1%   |
| Aatk     | 27.23226    | 1.09 | 4.0%   |
| AB013468 | 0.4152972   | 0.28 | 67.5%  |
| AB033515 | 0           | 0.00 |        |
| AB033524 | 0           | 0.00 |        |
| AB041550 | 0.3954328   | 0.11 | 27.2%  |
| AB041800 | 0.5930352   | 0.16 | 27.4%  |
| AB056442 | 0           | 0.00 |        |
| AB080658 | 0           | 0.00 |        |
| AB112350 | 2.14167     | 0.31 | 14.7%  |
| AB124611 | 0.00438304  | 0.01 | 223.6% |
| AB182283 | 12.33106    | 0.36 | 2.9%   |
| AB251060 | 0           | 0.00 |        |
| AB251100 | 0           | 0.00 |        |
| AB251138 | 0           | 0.00 |        |
| AB251164 | 0           | 0.00 |        |
| AB251181 | 0           | 0.00 |        |
| AB251235 | 0           | 0.00 |        |
| AB251236 | 0           | 0.00 |        |
| AB294520 | 0.5668768   | 0.93 | 164.0% |
| AB294521 | 4.264222    | 1.77 | 41.4%  |
| AB294522 | 0.648241384 | 0.41 | 63.9%  |
| AB294523 | 0.6467278   | 0.49 | 75.3%  |
| AB294524 | 2.9165428   | 3.20 | 109.7% |
| AB294526 | 6.41179     | 2.51 | 39.2%  |
| AB294528 | 7.672966    | 3.78 | 49.2%  |
| Abat     | 98.769      | 5.62 | 5.7%   |



|        |             |      |        |
|--------|-------------|------|--------|
| Abca1  | 2.83699     | 0.19 | 6.8%   |
| Abca12 | 0.00629912  | 0.01 | 137.0% |
| Abca13 | 0.012376838 | 0.01 | 54.4%  |
| Abca14 | 0           | 0.00 |        |
| Abca15 | 0           | 0.00 |        |
| Abca16 | 0           | 0.00 |        |
| Abca17 | 0.4803562   | 0.03 | 6.9%   |
| Abca2  | 21.18438    | 1.57 | 7.4%   |
| Abca3  | 40.83296    | 1.20 | 2.9%   |
| Abca4  | 0.02047109  | 0.01 | 72.9%  |
| Abca5  | 11.93326    | 1.15 | 9.6%   |
| abca5  | 2.319002    | 0.42 | 18.0%  |
| Abca6  | 0.446087    | 0.29 | 64.4%  |
| Abca7  | 5.564732    | 0.88 | 15.8%  |
| Abca8a | 1.3372362   | 0.61 | 45.4%  |
| abca8a | 0.3945558   | 0.21 | 54.1%  |
| Abca8b | 2.570272    | 0.31 | 12.1%  |
| Abca9  | 1.1398234   | 0.41 | 36.3%  |
| Abcb10 | 10.220462   | 0.58 | 5.7%   |
| Abcb11 | 0.003279422 | 0.00 | 138.6% |
| Abcb1a | 0.1020986   | 0.02 | 19.0%  |
| Abcb1b | 0.3702846   | 0.02 | 4.3%   |
| Abcb4  | 0.353608    | 0.06 | 16.8%  |
| Abcb5  | 0           | 0.00 |        |
| Abcb6  | 12.93716    | 0.67 | 5.2%   |
| Abcb7  | 7.777142    | 1.00 | 12.8%  |
| Abcb8  | 15.59014    | 0.34 | 2.2%   |
| Abcb9  | 17.07774    | 1.51 | 8.9%   |
| Abcc1  | 3.240298    | 0.13 | 4.0%   |
| Abcc10 | 3.803718    | 0.12 | 3.1%   |
| Abcc12 | 0.10062262  | 0.03 | 32.4%  |
| Abcc2  | 0.008969792 | 0.01 | 78.3%  |
| Abcc3  | 0.015177798 | 0.01 | 48.6%  |
| Abcc4  | 1.19708     | 0.11 | 8.8%   |
| Abcc5  | 32.0405     | 4.27 | 13.3%  |
| Abcc6  | 0           | 0.00 |        |
| Abcc8  | 5.208564    | 0.34 | 6.5%   |
| Abcc9  | 0.1534606   | 0.03 | 19.2%  |
| Abcd1  | 3.06658     | 0.22 | 7.3%   |
| Abcd2  | 4.511872    | 0.44 | 9.7%   |
| Abcd3  | 29.16594    | 1.40 | 4.8%   |
| Abcd4  | 1.520394    | 0.17 | 11.1%  |
| Abce1  | 27.99334    | 2.24 | 8.0%   |
| Abcf1  | 21.52804    | 1.05 | 4.9%   |
| Abcf2  | 18.54924    | 0.48 | 2.6%   |
| Abcf3  | 19.37008    | 0.94 | 4.9%   |
| Abcg1  | 8.411136    | 1.23 | 14.7%  |

|         |            |      |        |
|---------|------------|------|--------|
| Abcg2   | 2.471366   | 0.60 | 24.4%  |
| Abcg3   | 0.00553912 | 0.01 | 138.2% |
| Abcg4   | 20.19574   | 0.30 | 1.5%   |
| Abcg5   | 0.00903914 | 0.01 | 93.9%  |
| Abcg8   | 0.00531976 | 0.01 | 141.0% |
| ABCR    | 0.03139412 | 0.06 | 176.8% |
| Abhd1   | 3.120484   | 0.30 | 9.5%   |
| Abhd10  | 15.11326   | 1.00 | 6.6%   |
| Abhd11  | 3.299572   | 0.73 | 22.0%  |
| Abhd12  | 55.25248   | 1.14 | 2.1%   |
| Abhd13  | 10.81071   | 0.74 | 6.8%   |
| Abhd14a | 5.381584   | 0.45 | 8.4%   |
| Abhd14b | 4.754016   | 0.73 | 15.3%  |
| Abhd2   | 7.763458   | 0.27 | 3.5%   |
| Abhd3   | 5.87975    | 0.73 | 12.4%  |
| Abhd4   | 18.59434   | 0.60 | 3.2%   |
| Abhd5   | 5.373926   | 0.45 | 8.4%   |
| Abhd6   | 6.449272   | 0.29 | 4.6%   |
| Abhd7   | 2.981206   | 0.24 | 8.0%   |
| Abhd8   | 65.7427    | 2.41 | 3.7%   |
| Abhd9   | 0.0307892  | 0.02 | 50.8%  |
| Abi1    | 26.15372   | 0.82 | 3.1%   |
| Abi2    | 46.56122   | 2.84 | 6.1%   |
| Abi3    | 0          | 0.00 |        |
| Abi3bp  | 0.1497514  | 0.05 | 30.8%  |
| Abl1    | 5.980232   | 0.24 | 4.1%   |
| Abl2    | 5.834154   | 0.27 | 4.6%   |
| Ablim1  | 17.25326   | 0.80 | 4.6%   |
| Ablim2  | 21.00608   | 1.56 | 7.4%   |
| ABLIM2  | 1.123045   | 0.76 | 67.3%  |
| Ablim3  | 18.32332   | 3.01 | 16.4%  |
| Abo     | 0.01073    | 0.02 | 147.5% |
| Abp1    | 0.01908966 | 0.01 | 68.9%  |
| Abpa    | 0          | 0.00 |        |
| abParts | 0          | 0.00 |        |
| Abpd    | 0          | 0.00 |        |
| Abpe    | 0          | 0.00 |        |
| Abpg    | 0          | 0.00 |        |
| Abpz    | 0          | 0.00 |        |
| Abr     | 71.39576   | 0.79 | 1.1%   |
| Abra    | 0.00293298 | 0.01 | 223.6% |
| Abt1    | 2.537332   | 0.19 | 7.5%   |
| Abtb1   | 8.134036   | 0.67 | 8.2%   |
| Abtb2   | 1.48906    | 0.14 | 9.7%   |
| Acaa1a  | 10.3623    | 0.32 | 3.1%   |
| Acaa1b  | 0.7949888  | 0.13 | 17.0%  |
| Acaa2   | 5.590178   | 0.37 | 6.6%   |

|        |             |       |        |
|--------|-------------|-------|--------|
| Acaca  | 8.592154    | 0.79  | 9.2%   |
| Acacb  | 0.3185998   | 0.03  | 10.4%  |
| Acad10 | 0.691485    | 0.09  | 13.0%  |
| Acad11 | 4.665898    | 0.94  | 20.1%  |
| Acad8  | 5.579444    | 0.31  | 5.5%   |
| Acad9  | 7.597216    | 0.19  | 2.5%   |
| Acadl  | 8.671446    | 0.87  | 10.0%  |
| Acadm  | 6.951174    | 0.47  | 6.8%   |
| Acads  | 1.9809      | 0.29  | 14.7%  |
| Acadsb | 14.61492    | 1.05  | 7.2%   |
| Acadvl | 12.69928    | 0.28  | 2.2%   |
| Acan   | 0.8833888   | 0.14  | 16.2%  |
| Acat1  | 46.53376    | 2.79  | 6.0%   |
| Acat2  | 57.02066    | 5.34  | 9.4%   |
| Acat3  | 7.573334    | 0.62  | 8.2%   |
| Acbd3  | 13.73016    | 0.70  | 5.1%   |
| Acbd4  | 5.2961      | 0.88  | 16.6%  |
| Acbd5  | 21.47516    | 0.81  | 3.8%   |
| Acbd6  | 20.32646    | 1.84  | 9.1%   |
| Accn1  | 20.27848    | 1.28  | 6.3%   |
| Accn2  | 39.48772    | 2.49  | 6.3%   |
| Accn3  | 0.0425642   | 0.03  | 68.1%  |
| Accn4  | 0.1948974   | 0.04  | 21.2%  |
| Accn5  | 0.01030616  | 0.02  | 223.6% |
| Acd    | 10.69017    | 0.62  | 5.8%   |
| Ace    | 7.159446    | 0.19  | 2.6%   |
| Ace2   | 0.014457308 | 0.00  | 28.9%  |
| Ache   | 99.39146    | 7.25  | 7.3%   |
| Acin1  | 27.4657     | 2.84  | 10.3%  |
| Acly   | 131.8952    | 11.42 | 8.7%   |
| Acmsd  | 0.080258    | 0.05  | 67.7%  |
| Acn9   | 5.844678    | 0.53  | 9.1%   |
| Acnat1 | 0.00998564  | 0.01  | 137.0% |
| Aco1   | 12.39916    | 0.54  | 4.3%   |
| Aco2   | 137.9162    | 1.23  | 0.9%   |
| Acot1  | 2.73675     | 0.13  | 4.6%   |
| Acot10 | 7.536092    | 0.24  | 3.2%   |
| Acot11 | 1.511578    | 0.22  | 14.5%  |
| Acot12 | 0.02216256  | 0.03  | 114.4% |
| Acot2  | 1.911334    | 0.23  | 12.0%  |
| Acot3  | 0.3586152   | 0.06  | 15.6%  |
| Acot4  | 0.1094063   | 0.03  | 29.1%  |
| Acot5  | 0.12909314  | 0.07  | 53.0%  |
| Acot6  | 0.6348482   | 0.10  | 16.4%  |
| Acot7  | 185.425     | 6.94  | 3.7%   |
| Acot8  | 6.222982    | 0.87  | 14.1%  |
| Acot9  | 4.325042    | 0.65  | 15.1%  |

|        |            |       |        |
|--------|------------|-------|--------|
| Acox1  | 44.51668   | 1.24  | 2.8%   |
| Acox2  | 0.01434116 | 0.01  | 65.4%  |
| Acox3  | 4.778924   | 0.17  | 3.7%   |
| Acox1  | 0.02998102 | 0.01  | 38.9%  |
| Acp1   | 1.178688   | 0.12  | 10.0%  |
| Acp2   | 17.4405    | 0.81  | 4.7%   |
| Acp5   | 0.235529   | 0.04  | 15.1%  |
| Acp6   | 2.5588     | 0.29  | 11.5%  |
| Acpl2  | 2.131526   | 0.13  | 6.1%   |
| Acpp   | 0.01229082 | 0.01  | 65.5%  |
| Acr    | 0.5597584  | 0.11  | 18.9%  |
| Acrbp  | 1.475986   | 0.19  | 12.7%  |
| ACRP   | 0.650613   | 0.12  | 18.8%  |
| Acrv1  | 0          | 0.00  |        |
| Acsbg1 | 11.848176  | 1.11  | 9.3%   |
| Acsbg2 | 0.00218664 | 0.00  | 223.6% |
| Acs1   | 7.442342   | 0.13  | 1.7%   |
| Acs13  | 50.6491    | 3.13  | 6.2%   |
| Acs14  | 56.46664   | 3.17  | 5.6%   |
| Acs15  | 4.748568   | 0.52  | 10.9%  |
| Acs16  | 34.0429    | 1.72  | 5.0%   |
| Acsm1  | 0          | 0.00  |        |
| Acsm2  | 0.0031381  | 0.01  | 223.6% |
| Acsm3  | 1.04807342 | 0.65  | 61.8%  |
| Acss1  | 0.9685128  | 0.12  | 12.3%  |
| Acss2  | 9.754494   | 1.12  | 11.4%  |
| Acta1  | 0.4761718  | 0.10  | 20.4%  |
| Acta2  | 3.433016   | 1.00  | 29.1%  |
| Actb   | 367.5268   | 42.92 | 11.7%  |
| Actc1  | 0.1455218  | 0.04  | 26.6%  |
| Actg1  | 30.10976   | 3.05  | 10.1%  |
| Actg2  | 0.02898956 | 0.03  | 96.2%  |
| Act16a | 2.64411    | 0.33  | 12.6%  |
| Act16b | 19.68226   | 1.87  | 9.5%   |
| Act17a | 0.00708448 | 0.01  | 137.8% |
| Act17b | 0          | 0.00  |        |
| Actn1  | 10.274128  | 0.71  | 6.9%   |
| Actn2  | 0.3693716  | 0.03  | 9.3%   |
| Actn3  | 1.631326   | 0.19  | 11.7%  |
| Actn4  | 16.22394   | 1.37  | 8.4%   |
| ActR   | 0.468354   | 0.22  | 47.5%  |
| Actr10 | 52.8386    | 1.12  | 2.1%   |
| Actr1a | 123.5422   | 8.44  | 6.8%   |
| Actr1b | 53.68658   | 1.28  | 2.4%   |
| Actr2  | 62.66932   | 3.32  | 5.3%   |
| Actr3  | 21.46836   | 1.51  | 7.0%   |
| Actr3b | 10.89892   | 0.79  | 7.3%   |

|         |             |      |        |
|---------|-------------|------|--------|
| Actr5   | 2.129936    | 0.15 | 7.1%   |
| Actr6   | 9.88259     | 0.39 | 4.0%   |
| Actr8   | 14.4552     | 0.67 | 4.7%   |
| Actrt1  | 0           | 0.00 |        |
| Actrt2  | 0           | 0.00 |        |
| Acvr1   | 6.864002    | 0.14 | 2.0%   |
| Acvr1b  | 32.02638    | 1.82 | 5.7%   |
| Acvr1c  | 0.1525416   | 0.04 | 25.1%  |
| Acvr2a  | 13.0117     | 1.22 | 9.4%   |
| Acvr2b  | 1.415344    | 0.27 | 19.1%  |
| Acvr1l  | 0.03094252  | 0.01 | 38.3%  |
| Acy1    | 1.88374     | 0.16 | 8.2%   |
| Acy1l2  | 0.5679396   | 0.16 | 28.2%  |
| Acy3    | 0.2429148   | 0.09 | 37.5%  |
| Acyp1   | 9.10444     | 0.85 | 9.3%   |
| Acyp2   | 25.3663     | 1.30 | 5.1%   |
| Ada     | 0.193813    | 0.06 | 28.5%  |
| Adad1   | 0           | 0.00 |        |
| Adal    | 6.966436    | 0.38 | 5.4%   |
| Adam10  | 13.47262    | 0.53 | 3.9%   |
| Adam11  | 17.27986    | 1.63 | 9.4%   |
| Adam12  | 0.403062    | 0.07 | 16.5%  |
| Adam15  | 20.0013     | 0.79 | 4.0%   |
| Adam17  | 2.473022    | 0.26 | 10.4%  |
| Adam18  | 0           | 0.00 |        |
| Adam19  | 3.53985     | 0.54 | 15.2%  |
| ADAM19  | 0.63106     | 0.30 | 47.4%  |
| Adam1a  | 0.4525566   | 0.11 | 23.7%  |
| Adam1b  | 0.017766864 | 0.02 | 115.7% |
| Adam2   | 0           | 0.00 |        |
| Adam21  | 0.4499714   | 0.05 | 10.6%  |
| ADAM22  | 38.81234    | 2.47 | 6.4%   |
| Adam22  | 16.58018    | 3.17 | 19.1%  |
| Adam23  | 44.98836    | 1.87 | 4.2%   |
| Adam24  | 0           | 0.00 |        |
| Adam25  | 0           | 0.00 |        |
| Adam26a | 0           | 0.00 |        |
| Adam26b | 0           | 0.00 |        |
| Adam28  | 0.01662794  | 0.02 | 114.4% |
| Adam29  | 0           | 0.00 |        |
| Adam3   | 0           | 0.00 |        |
| Adam30  | 0.00406412  | 0.01 | 223.6% |
| Adam32  | 0.3082072   | 0.13 | 40.9%  |
| Adam33  | 0.00518404  | 0.01 | 223.6% |
| Adam34  | 0.0029761   | 0.01 | 223.6% |
| Adam39  | 0.00320868  | 0.01 | 223.6% |
| Adam4   | 0.0677817   | 0.03 | 51.2%  |

|          |             |      |       |
|----------|-------------|------|-------|
| Adam5    | 0.0221845   | 0.02 | 74.4% |
| Adam6    | 0           | 0.00 |       |
| Adam7    | 0.00714924  | 0.01 | 98.2% |
| Adam8    | 0.516442    | 0.15 | 28.8% |
| Adam9    | 15.42936    | 0.69 | 4.5%  |
| Adamdec1 | 0.02948676  | 0.01 | 30.3% |
| Adamts1  | 2.359958    | 0.35 | 15.0% |
| Adamts10 | 6.739644    | 1.11 | 16.5% |
| Adamts12 | 2.239278    | 0.38 | 17.0% |
| Adamts13 | 0.013654638 | 0.01 | 45.8% |
| Adamts14 | 0.04763532  | 0.01 | 20.4% |
| Adamts15 | 1.41821     | 0.19 | 13.1% |
| Adamts16 | 0.2360192   | 0.05 | 21.3% |
| Adamts17 | 1.298402    | 0.23 | 18.1% |
| Adamts18 | 0.298162    | 0.09 | 29.5% |
| Adamts19 | 0.443267    | 0.04 | 9.8%  |
| Adamts2  | 1.573144    | 0.26 | 16.4% |
| Adamts20 | 1.1356896   | 0.16 | 13.9% |
| Adamts3  | 1.56458     | 0.04 | 2.8%  |
| Adamts4  | 0.1561068   | 0.06 | 35.8% |
| Adamts5  | 1.104964    | 0.05 | 4.8%  |
| Adamts6  | 0.8055704   | 0.10 | 12.4% |
| Adamts7  | 0.9243138   | 0.08 | 8.8%  |
| Adamts8  | 0.4591398   | 0.04 | 7.8%  |
| Adamts9  | 3.413476    | 0.54 | 15.8% |
| Adamtsl1 | 2.118294    | 0.13 | 6.0%  |
| Adamtsl2 | 1.2508118   | 0.36 | 28.4% |
| Adamtsl3 | 0.2590278   | 0.06 | 23.6% |
| Adamtsl4 | 0.07823148  | 0.01 | 18.9% |
| Adamtsl5 | 0.0626476   | 0.02 | 34.7% |
| Adar     | 39.39302    | 1.18 | 3.0%  |
| Adar3    | 1.368592    | 0.09 | 6.3%  |
| Adarb1   | 21.33148    | 0.90 | 4.2%  |
| Adarb2   | 1.830922    | 0.24 | 13.0% |
| Adat1    | 2.120644    | 0.27 | 12.6% |
| Adat3    | 1.1877484   | 0.25 | 20.8% |
| Adc      | 10.374204   | 0.37 | 3.6%  |
| Adck1    | 14.79222    | 0.29 | 2.0%  |
| Adck2    | 8.165208    | 0.10 | 1.2%  |
| Adck4    | 6.481974    | 0.41 | 6.3%  |
| Adck5    | 5.089698    | 0.41 | 8.1%  |
| Adcy1    | 35.31638    | 1.79 | 5.1%  |
| Adcy2    | 35.9468     | 1.29 | 3.6%  |
| Adcy3    | 13.91188    | 0.24 | 1.7%  |
| Adcy4    | 0.02258368  | 0.01 | 38.1% |
| Adcy5    | 13.8776     | 0.51 | 3.6%  |
| Adcy6    | 7.601348    | 0.76 | 10.1% |

|           |             |      |        |
|-----------|-------------|------|--------|
| Adcy7     | 3.624646    | 0.41 | 11.2%  |
| Adcy8     | 17.74162    | 0.64 | 3.6%   |
| Adcy9     | 6.70155     | 0.22 | 3.2%   |
| Adcyap1   | 1.64703     | 0.35 | 21.2%  |
| Adcyap1r1 | 33.67288    | 2.43 | 7.2%   |
| Add1      | 55.42516    | 2.29 | 4.1%   |
| ADD1      | 9.355026    | 0.50 | 5.3%   |
| Add2      | 33.96544    | 4.08 | 12.0%  |
| ADD2      | 0.51067672  | 0.78 | 153.0% |
| Add3      | 25.28408    | 2.25 | 8.9%   |
| Adfp      | 1.576588    | 0.17 | 11.1%  |
| Adh1      | 0.8033882   | 0.27 | 33.7%  |
| Adh4      | 0           | 0.00 |        |
| Adh5      | 27.45472    | 1.07 | 3.9%   |
| Adh6a     | 0           | 0.00 |        |
| Adh6b     | 0           | 0.00 |        |
| Adh6-ps1  | 0           | 0.00 |        |
| Adh7      | 0.04689638  | 0.03 | 69.1%  |
| Adhfe1    | 1.73047     | 0.86 | 50.0%  |
| Adi1      | 8.129366    | 0.21 | 2.6%   |
| Adipoq    | 0.02791982  | 0.02 | 63.4%  |
| Adipor1   | 36.8569     | 1.91 | 5.2%   |
| Adipor2   | 17.4415     | 0.70 | 4.0%   |
| Adk       | 12.14834    | 0.63 | 5.2%   |
| Adm       | 1.3475884   | 0.46 | 34.3%  |
| Adm2      | 0.0631864   | 0.04 | 60.6%  |
| Admr      | 0.06638146  | 0.03 | 38.7%  |
| Adnp      | 33.649      | 1.13 | 3.4%   |
| Adora1    | 11.93766    | 0.90 | 7.5%   |
| Adora2a   | 0.3776996   | 0.05 | 12.7%  |
| Adora2b   | 0.594176    | 0.26 | 43.5%  |
| Adora3    | 0           | 0.00 |        |
| Adpgk     | 9.007076    | 0.29 | 3.2%   |
| Adprh     | 45.66598    | 1.35 | 2.9%   |
| Adprh1    | 0           | 0.00 |        |
| Adprh2    | 7.92016     | 0.55 | 6.9%   |
| Adprt3    | 0.02958004  | 0.06 | 187.2% |
| Adra1a    | 2.282118    | 0.13 | 5.5%   |
| Adra1b    | 10.276112   | 1.38 | 13.5%  |
| Adra1d    | 0.8868502   | 0.08 | 8.5%   |
| Adra2a    | 17.66096    | 0.84 | 4.8%   |
| Adra2b    | 0.007961938 | 0.01 | 100.2% |
| Adra2c    | 0.7679106   | 0.05 | 6.3%   |
| Adrb1     | 1.9138      | 0.20 | 10.6%  |
| Adrb2     | 0.1401438   | 0.06 | 43.6%  |
| Adrb3     | 0.4855288   | 0.09 | 18.4%  |
| Adrbk1    | 47.06478    | 1.13 | 2.4%   |

|          |             |       |        |
|----------|-------------|-------|--------|
| Adrbk2   | 6.550494    | 0.42  | 6.4%   |
| Adrm1    | 5.994626    | 0.80  | 13.4%  |
| Adsl     | 11.062668   | 1.33  | 12.0%  |
| Adss     | 40.59482    | 1.78  | 4.4%   |
| Adssl1   | 2.445134    | 0.36  | 14.8%  |
| Aebp1    | 0.5873986   | 0.13  | 22.7%  |
| Aebp2    | 11.50766    | 0.44  | 3.9%   |
| Aes      | 154.4864    | 6.76  | 4.4%   |
| AF032968 | 0           | 0.00  |        |
| AF060570 | 0.11296294  | 0.04  | 31.7%  |
| AF067063 | 0           | 0.00  |        |
| AF080584 | 0.01177884  | 0.03  | 223.6% |
| AF090403 | 11.14484    | 0.93  | 8.3%   |
| AF106279 | 0.01347664  | 0.03  | 223.6% |
| AF118847 | 0.04048876  | 0.02  | 48.9%  |
| AF121215 | 0.0417737   | 0.01  | 23.8%  |
| AF217545 | 248.3488    | 13.33 | 5.4%   |
| AF332090 | 0.07442826  | 0.02  | 25.4%  |
| AF357374 | 0           | 0.00  |        |
| AF357376 | 0           | 0.00  |        |
| AF357401 | 0.335758    | 0.53  | 157.4% |
| AF365932 | 0.10738562  | 0.17  | 154.7% |
| AF365933 | 0.04555598  | 0.04  | 77.3%  |
| AF366264 | 0           | 0.00  |        |
| AF380425 | 0.14901312  | 0.14  | 95.5%  |
| AF401983 | 0           | 0.00  |        |
| AF479022 | 0           | 0.00  |        |
| AF498300 | 11.047524   | 2.65  | 24.0%  |
| AF498301 | 11.644996   | 2.48  | 21.3%  |
| AF498302 | 21.14846    | 2.08  | 9.8%   |
| AF529169 | 10.765464   | 1.23  | 11.4%  |
| Afap1    | 7.602032    | 0.85  | 11.2%  |
| Afap1l1  | 0.7253292   | 0.07  | 9.0%   |
| Afap1l2  | 0.4554212   | 0.08  | 18.2%  |
| Aff1     | 1.1730164   | 0.22  | 19.1%  |
| Aff2     | 7.185622    | 0.56  | 7.8%   |
| Aff3     | 10.178546   | 0.56  | 5.5%   |
| Aff4     | 23.7827     | 3.08  | 13.0%  |
| Afg3l1   | 9.410154    | 0.92  | 9.8%   |
| Afg3l2   | 27.9851     | 0.75  | 2.7%   |
| Afm      | 0.00295178  | 0.01  | 223.6% |
| Afmid    | 1.0721906   | 0.18  | 16.4%  |
| Afp      | 0.00365856  | 0.01  | 223.6% |
| Aftph    | 16.95326    | 0.70  | 4.1%   |
| Aga      | 0.8136048   | 0.21  | 25.5%  |
| Agbl1    | 0.017644078 | 0.02  | 135.8% |
| Agbl2    | 0.040458586 | 0.03  | 81.5%  |



|          |            |      |        |
|----------|------------|------|--------|
| Agbl3    | 2.714886   | 0.67 | 24.8%  |
| Agbl5    | 7.943008   | 0.49 | 6.2%   |
| Ager     | 0.3617254  | 0.13 | 37.1%  |
| Aggf1    | 11.64314   | 0.41 | 3.5%   |
| Agk      | 4.924206   | 0.17 | 3.5%   |
| Agj      | 7.497758   | 0.79 | 10.6%  |
| Agmat    | 0.01342822 | 0.01 | 93.1%  |
| Agpat1   | 55.66076   | 5.61 | 10.1%  |
| Agpat2   | 0.7526106  | 0.28 | 36.7%  |
| Agpat3   | 39.70682   | 1.14 | 2.9%   |
| Agpat4   | 14.1195    | 1.00 | 7.1%   |
| Agpat5   | 14.09498   | 0.63 | 4.5%   |
| Agpat6   | 24.4893    | 1.33 | 5.4%   |
| Agpat7   | 24.07204   | 1.80 | 7.5%   |
| Agps     | 14.46286   | 0.71 | 4.9%   |
| Agr2     | 0.29400396 | 0.26 | 89.4%  |
| Agr3     | 0.01051204 | 0.02 | 223.6% |
| Agrin    | 9.205592   | 0.74 | 8.0%   |
| Agrn     | 19.00096   | 1.52 | 8.0%   |
| Agrp     | 1.2475936  | 0.41 | 32.5%  |
| Agt      | 0.4005092  | 0.14 | 35.0%  |
| Agtbbp1  | 28.72528   | 1.59 | 5.5%   |
| Agtr1a   | 0.254012   | 0.03 | 12.4%  |
| Agtr1b   | 0.02312494 | 0.03 | 132.6% |
| Agtr2    | 22.6958    | 4.68 | 20.6%  |
| Agtrap   | 2.127842   | 0.16 | 7.6%   |
| Agtrl1   | 0.06927148 | 0.06 | 89.6%  |
| Agxt     | 0          | 0.00 |        |
| Agxt2    | 0.01132862 | 0.02 | 141.4% |
| Agxt2l1  | 0.02569792 | 0.01 | 39.0%  |
| Agxt2l2  | 1.739364   | 0.44 | 25.2%  |
| Ahctf1   | 3.710542   | 0.48 | 13.0%  |
| Ahcy     | 0.12571454 | 0.04 | 33.7%  |
| Ahcy1    | 61.30344   | 3.65 | 5.9%   |
| Ahdc1    | 5.435606   | 0.49 | 9.0%   |
| Ahi1     | 129.4638   | 3.84 | 3.0%   |
| Ahi-1    | 37.9776    | 2.26 | 6.0%   |
| Ahnak    | 2.553644   | 0.55 | 21.4%  |
| Ahnak2   | 1.123406   | 0.07 | 6.5%   |
| Ahr      | 2.984932   | 0.18 | 6.0%   |
| Ahrr     | 0.04538132 | 0.02 | 40.5%  |
| Ahsa1    | 48.47232   | 2.44 | 5.0%   |
| Ahsa2    | 6.067178   | 0.85 | 14.0%  |
| Ahsg     | 0          | 0.00 |        |
| Al115600 | 10.64768   | 0.36 | 3.4%   |
| Al118078 | 3.627414   | 0.62 | 17.2%  |
| Al132487 | 1.2415     | 0.12 | 9.8%   |

|          |            |      |        |
|----------|------------|------|--------|
| AI182371 | 0.1430784  | 0.04 | 28.3%  |
| AI314180 | 29.02204   | 1.57 | 5.4%   |
| AI314976 | 3.474592   | 0.21 | 6.1%   |
| AI316787 | 19.31386   | 0.51 | 2.6%   |
| AI316807 | 18.1889    | 0.63 | 3.5%   |
| AI317237 | 7.346176   | 0.62 | 8.4%   |
| AI317395 | 0.09422538 | 0.02 | 22.6%  |
| AI324046 | 0.0031421  | 0.01 | 223.6% |
| AI413582 | 32.30442   | 1.37 | 4.2%   |
| AI413782 | 13.21092   | 0.49 | 3.7%   |
| AI427122 | 0.5833762  | 0.08 | 13.5%  |
| AI427515 | 59.80826   | 2.96 | 5.0%   |
| AI427809 | 0.03678648 | 0.02 | 62.3%  |
| AI428936 | 0.8351486  | 0.04 | 4.3%   |
| AI429214 | 0.583084   | 0.14 | 23.7%  |
| AI449175 | 5.851524   | 0.55 | 9.3%   |
| AI450540 | 11.64316   | 0.68 | 5.8%   |
| AI450948 | 0.322315   | 0.13 | 39.3%  |
| AI451557 | 0.13838928 | 0.05 | 38.2%  |
| AI451617 | 0.01610434 | 0.03 | 161.5% |
| AI461788 | 2.434452   | 0.13 | 5.3%   |
| AI462493 | 13.9037    | 0.75 | 5.4%   |
| AI464131 | 1.894272   | 0.15 | 7.7%   |
| AI467606 | 0          | 0.00 |        |
| AI480556 | 2.287972   | 0.23 | 10.1%  |
| AI480653 | 18.03674   | 1.32 | 7.3%   |
| AI481877 | 0.00408518 | 0.01 | 223.6% |
| AI504432 | 6.21817    | 0.38 | 6.1%   |
| AI593442 | 88.0024    | 1.70 | 1.9%   |
| AI595366 | 2.147036   | 0.25 | 11.4%  |
| AI595406 | 16.93204   | 0.97 | 5.7%   |
| AI597468 | 14.32192   | 0.62 | 4.3%   |
| AI597479 | 11.505     | 0.72 | 6.3%   |
| AI606181 | 1.1486064  | 0.29 | 25.4%  |
| AI607873 | 0          | 0.00 |        |
| AI646023 | 8.307466   | 0.50 | 6.0%   |
| AI661453 | 0.05204212 | 0.05 | 91.0%  |
| AI662250 | 3.310718   | 0.24 | 7.2%   |
| AI747448 | 0          | 0.00 |        |
| AI747699 | 0.2034578  | 0.05 | 25.9%  |
| AI790298 | 0.8573568  | 0.07 | 8.0%   |
| AI836003 | 20.26632   | 2.53 | 12.5%  |
| AI837181 | 32.2472    | 1.81 | 5.6%   |
| AI842396 | 1.452346   | 0.10 | 6.7%   |
| AI846148 | 12.24308   | 0.21 | 1.7%   |
| AI847670 | 5.454972   | 0.27 | 4.9%   |
| AI848100 | 14.11      | 0.54 | 3.8%   |

|          |            |      |        |
|----------|------------|------|--------|
| AI851790 | 26.9096    | 1.38 | 5.1%   |
| AI854703 | 12.35578   | 0.85 | 6.9%   |
| AI894139 | 5.197914   | 0.20 | 3.9%   |
| AI931714 | 9.486048   | 0.46 | 4.8%   |
| AI987662 | 0.12901082 | 0.03 | 23.9%  |
| AI987692 | 0.05243654 | 0.04 | 71.5%  |
| AI987944 | 4.15134    | 0.54 | 12.9%  |
| Aicda    | 0.0210776  | 0.02 | 111.2% |
| Aif1     | 0.03963548 | 0.01 | 33.1%  |
| Aifl     | 2.460408   | 0.88 | 35.6%  |
| Aifm1    | 13.16088   | 0.97 | 7.4%   |
| Aifm2    | 5.809318   | 1.06 | 18.3%  |
| Aifm3    | 2.817486   | 0.43 | 15.2%  |
| Aig1     | 31.5787    | 1.91 | 6.0%   |
| Aim1     | 0.0208011  | 0.02 | 81.8%  |
| Aim1l    | 0.16932558 | 0.06 | 38.4%  |
| Aim2     | 0.04368848 | 0.03 | 67.1%  |
| Aip      | 31.52182   | 1.63 | 5.2%   |
| Aipl1    | 0.05734776 | 0.06 | 99.1%  |
| Aire     | 0          | 0.00 |        |
| AJ001378 | 0          | 0.00 |        |
| AJ311366 | 0          | 0.00 |        |
| AJ517767 | 7.808036   | 1.48 | 19.0%  |
| Ajap1    | 9.228412   | 0.74 | 8.0%   |
| AK002250 | 0          | 0.00 |        |
| AK002372 | 1.6995162  | 0.62 | 36.3%  |
| AK002390 | 0.8859892  | 0.07 | 7.6%   |
| AK002417 | 0          | 0.00 |        |
| AK002541 | 0.53100708 | 0.69 | 130.6% |
| AK002663 | 0.0173931  | 0.02 | 139.7% |
| AK002708 | 0.0127786  | 0.01 | 100.0% |
| AK002723 | 0.2616564  | 0.11 | 40.4%  |
| AK002733 | 0          | 0.00 |        |
| AK002748 | 0.04967466 | 0.05 | 104.9% |
| AK002838 | 0          | 0.00 |        |
| AK002860 | 1.555658   | 0.26 | 16.6%  |
| AK002866 | 0.0767851  | 0.02 | 19.7%  |
| AK002929 | 0.03421382 | 0.03 | 99.8%  |
| AK003073 | 0.2374108  | 0.08 | 33.1%  |
| AK003103 | 0.04249966 | 0.03 | 59.1%  |
| AK003136 | 0.25001692 | 0.21 | 82.3%  |
| AK003315 | 85.25648   | 6.62 | 7.8%   |
| AK003327 | 0          | 0.00 |        |
| AK003573 | 11.16208   | 0.71 | 6.4%   |
| AK003663 | 0          | 0.00 |        |
| AK003723 | 0.2486564  | 0.08 | 34.2%  |
| AK003793 | 1.081541   | 0.60 | 55.9%  |

|          |            |       |        |
|----------|------------|-------|--------|
| AK003800 | 0.9154782  | 0.27  | 29.1%  |
| AK003812 | 0.24538632 | 0.18  | 74.0%  |
| AK003841 | 0.3104328  | 0.10  | 31.0%  |
| AK003943 | 0.00585342 | 0.01  | 223.6% |
| AK004150 | 7.545708   | 0.44  | 5.8%   |
| AK004173 | 3.5057378  | 1.54  | 44.0%  |
| AK004186 | 0.8781744  | 0.32  | 36.2%  |
| AK004221 | 0.01902628 | 0.03  | 137.2% |
| AK004226 | 0          | 0.00  |        |
| AK004252 | 0.635482   | 0.09  | 13.4%  |
| AK004338 | 95.64566   | 2.22  | 2.3%   |
| AK004382 | 25.4129    | 2.07  | 8.2%   |
| AK004399 | 162.9982   | 8.42  | 5.2%   |
| AK004434 | 0.1935828  | 0.08  | 39.7%  |
| AK004512 | 18.66178   | 0.93  | 5.0%   |
| AK004513 | 0.6247668  | 0.27  | 43.9%  |
| AK004585 | 0.7601804  | 0.17  | 21.9%  |
| AK004727 | 37.78382   | 17.83 | 47.2%  |
| AK004850 | 0.2672298  | 0.08  | 29.8%  |
| AK005093 | 2.761178   | 0.38  | 13.7%  |
| AK005115 | 0.52941    | 0.10  | 18.8%  |
| AK005116 | 8.828756   | 1.09  | 12.3%  |
| AK005183 | 5.451364   | 0.66  | 12.2%  |
| AK005214 | 0.3562866  | 0.09  | 26.3%  |
| AK005275 | 0.04933012 | 0.01  | 20.3%  |
| AK005305 | 1.246301   | 0.23  | 18.7%  |
| AK005306 | 1.416686   | 0.19  | 13.5%  |
| AK005363 | 0.2208116  | 0.16  | 72.4%  |
| AK005385 | 0.9079528  | 0.09  | 10.0%  |
| AK005414 | 0          | 0.00  |        |
| AK005418 | 0          | 0.00  |        |
| AK005477 | 0.06373964 | 0.03  | 43.1%  |
| AK005481 | 2.0435914  | 0.71  | 34.9%  |
| AK005503 | 4.125268   | 0.45  | 11.0%  |
| AK005538 | 0.4742394  | 0.22  | 46.5%  |
| AK005539 | 0          | 0.00  |        |
| AK005556 | 2.891642   | 0.33  | 11.3%  |
| AK005569 | 0.1882309  | 0.18  | 96.5%  |
| AK005576 | 0          | 0.00  |        |
| AK005578 | 0.008351   | 0.02  | 223.6% |
| AK005580 | 0          | 0.00  |        |
| AK005589 | 0          | 0.00  |        |
| AK005591 | 0.19027248 | 0.15  | 77.8%  |
| AK005600 | 0          | 0.00  |        |
| AK005607 | 0          | 0.00  |        |
| AK005608 | 0.20860882 | 0.09  | 43.2%  |
| AK005616 | 0.10480626 | 0.07  | 64.5%  |

|          |             |      |        |
|----------|-------------|------|--------|
| AK005629 | 0           | 0.00 |        |
| AK005634 | 0.003518716 | 0.01 | 152.2% |
| AK005635 | 0           | 0.00 |        |
| AK005639 | 0           | 0.00 |        |
| AK005641 | 1.604364    | 0.62 | 38.9%  |
| AK005643 | 0           | 0.00 |        |
| AK005649 | 0           | 0.00 |        |
| AK005651 | 0.15201656  | 0.07 | 45.9%  |
| AK005653 | 0.5307186   | 0.17 | 31.1%  |
| AK005657 | 0           | 0.00 |        |
| AK005663 | 0.3393674   | 0.12 | 33.9%  |
| AK005667 | 0           | 0.00 |        |
| AK005677 | 0.03984338  | 0.04 | 108.6% |
| AK005678 | 0.17938614  | 0.22 | 120.7% |
| AK005679 | 0.1255996   | 0.02 | 18.6%  |
| AK005686 | 0           | 0.00 |        |
| AK005707 | 0.05789542  | 0.04 | 74.9%  |
| AK005712 | 0           | 0.00 |        |
| AK005722 | 0           | 0.00 |        |
| AK005744 | 0.01517008  | 0.02 | 137.0% |
| AK005746 | 0.4365072   | 0.09 | 20.1%  |
| AK005754 | 0           | 0.00 |        |
| AK005757 | 7.578178    | 0.36 | 4.7%   |
| AK005780 | 0.01508388  | 0.03 | 223.6% |
| AK005784 | 0.5731066   | 0.13 | 23.3%  |
| AK005793 | 0.03917803  | 0.05 | 134.0% |
| AK005807 | 0           | 0.00 |        |
| AK005811 | 0.01355466  | 0.02 | 141.3% |
| AK005822 | 0.03253124  | 0.02 | 63.8%  |
| AK005828 | 0           | 0.00 |        |
| AK005833 | 0           | 0.00 |        |
| AK005834 | 0.00601656  | 0.01 | 223.6% |
| AK005838 | 1.278838    | 0.31 | 24.4%  |
| AK005839 | 0           | 0.00 |        |
| AK005849 | 0           | 0.00 |        |
| AK005856 | 0           | 0.00 |        |
| AK005867 | 0           | 0.00 |        |
| AK005877 | 0.01461408  | 0.03 | 223.6% |
| AK005894 | 0.107463    | 0.11 | 101.5% |
| AK005895 | 0           | 0.00 |        |
| AK005897 | 0.10208554  | 0.11 | 104.2% |
| AK005898 | 0.3213372   | 0.14 | 43.3%  |
| AK005905 | 0.09964674  | 0.11 | 110.5% |
| AK005912 | 0           | 0.00 |        |
| AK005951 | 0.3457344   | 0.15 | 43.7%  |
| AK005956 | 0.027222    | 0.04 | 141.9% |
| AK005958 | 0           | 0.00 |        |

|          |             |      |        |
|----------|-------------|------|--------|
| AK005967 | 1.781402    | 0.36 | 20.3%  |
| AK005987 | 0           | 0.00 |        |
| AK005994 | 0           | 0.00 |        |
| AK006001 | 0.1298988   | 0.09 | 67.0%  |
| AK006022 | 0.1674216   | 0.12 | 73.1%  |
| AK006024 | 0           | 0.00 |        |
| AK006029 | 0           | 0.00 |        |
| AK006031 | 0           | 0.00 |        |
| AK006037 | 0.064201    | 0.14 | 223.6% |
| AK006039 | 0           | 0.00 |        |
| AK006045 | 0.02104276  | 0.03 | 152.4% |
| AK006051 | 0.13846056  | 0.03 | 23.7%  |
| AK006052 | 0           | 0.00 |        |
| AK006056 | 0           | 0.00 |        |
| AK006070 | 0           | 0.00 |        |
| AK006071 | 0           | 0.00 |        |
| AK006075 | 0           | 0.00 |        |
| AK006076 | 0           | 0.00 |        |
| AK006082 | 4.785176    | 0.17 | 3.5%   |
| AK006087 | 0.08321332  | 0.06 | 68.2%  |
| AK006104 | 0.00260282  | 0.01 | 223.6% |
| AK006108 | 0           | 0.00 |        |
| AK006114 | 0           | 0.00 |        |
| AK006119 | 0.21284756  | 0.12 | 57.5%  |
| AK006121 | 0           | 0.00 |        |
| AK006131 | 0           | 0.00 |        |
| AK006138 | 0.019267698 | 0.02 | 121.6% |
| AK006139 | 0           | 0.00 |        |
| AK006160 | 0           | 0.00 |        |
| AK006167 | 0.01277534  | 0.03 | 223.6% |
| AK006173 | 0.05236606  | 0.03 | 59.0%  |
| AK006186 | 0           | 0.00 |        |
| AK006189 | 0           | 0.00 |        |
| AK006191 | 0.14817926  | 0.06 | 42.5%  |
| AK006196 | 0.1103602   | 0.05 | 49.8%  |
| AK006202 | 0           | 0.00 |        |
| AK006231 | 0           | 0.00 |        |
| AK006239 | 0.1162965   | 0.10 | 83.3%  |
| AK006240 | 0           | 0.00 |        |
| AK006245 | 0.0579038   | 0.08 | 140.8% |
| AK006250 | 0.1628252   | 0.02 | 13.2%  |
| AK006252 | 0.7147798   | 0.14 | 19.0%  |
| AK006255 | 0.11061238  | 0.06 | 57.4%  |
| AK006264 | 0           | 0.00 |        |
| AK006272 | 0           | 0.00 |        |
| AK006282 | 0.01940108  | 0.02 | 98.6%  |
| AK006292 | 0           | 0.00 |        |

|          |            |      |        |
|----------|------------|------|--------|
| AK006293 | 0          | 0.00 |        |
| AK006304 | 0          | 0.00 |        |
| AK006308 | 0.01019722 | 0.02 | 223.6% |
| AK006310 | 0.0075329  | 0.02 | 223.6% |
| AK006321 | 0          | 0.00 |        |
| AK006331 | 0          | 0.00 |        |
| AK006334 | 0.01477118 | 0.02 | 139.0% |
| AK006343 | 0          | 0.00 |        |
| AK006348 | 0          | 0.00 |        |
| AK006355 | 0          | 0.00 |        |
| AK006362 | 0          | 0.00 |        |
| AK006376 | 0          | 0.00 |        |
| AK006380 | 0          | 0.00 |        |
| AK006388 | 0.00392746 | 0.01 | 223.6% |
| AK006389 | 0          | 0.00 |        |
| AK006397 | 0.08070672 | 0.07 | 81.6%  |
| AK006409 | 0          | 0.00 |        |
| AK006412 | 0          | 0.00 |        |
| AK006413 | 0          | 0.00 |        |
| AK006426 | 0          | 0.00 |        |
| AK006434 | 0.1402126  | 0.03 | 22.1%  |
| AK006443 | 0          | 0.00 |        |
| AK006451 | 0          | 0.00 |        |
| AK006454 | 0.10137776 | 0.08 | 81.8%  |
| AK006455 | 0          | 0.00 |        |
| AK006457 | 0          | 0.00 |        |
| AK006461 | 0.0134464  | 0.02 | 139.5% |
| AK006465 | 0          | 0.00 |        |
| AK006470 | 0          | 0.00 |        |
| AK006474 | 0          | 0.00 |        |
| AK006485 | 0          | 0.00 |        |
| AK006486 | 0          | 0.00 |        |
| AK006507 | 0          | 0.00 |        |
| AK006510 | 0          | 0.00 |        |
| AK006512 | 0          | 0.00 |        |
| AK006531 | 0          | 0.00 |        |
| AK006540 | 0          | 0.00 |        |
| AK006546 | 0.00289758 | 0.01 | 223.6% |
| AK006560 | 0          | 0.00 |        |
| AK006561 | 0.0757494  | 0.06 | 77.6%  |
| AK006563 | 0          | 0.00 |        |
| AK006568 | 0          | 0.00 |        |
| AK006570 | 0          | 0.00 |        |
| AK006572 | 0          | 0.00 |        |
| AK006576 | 0.06282626 | 0.02 | 37.2%  |
| AK006581 | 0          | 0.00 |        |
| AK006587 | 0          | 0.00 |        |

|          |            |      |        |
|----------|------------|------|--------|
| AK006595 | 0.17824444 | 0.12 | 65.3%  |
| AK006607 | 0.2012256  | 0.08 | 41.3%  |
| AK006610 | 0.15209618 | 0.10 | 69.0%  |
| AK006623 | 0          | 0.00 |        |
| AK006633 | 0          | 0.00 |        |
| AK006637 | 0.0937403  | 0.03 | 35.7%  |
| AK006644 | 0.04575366 | 0.07 | 157.5% |
| AK006651 | 1.4538286  | 0.36 | 24.7%  |
| AK006653 | 0          | 0.00 |        |
| AK006659 | 0          | 0.00 |        |
| AK006664 | 0          | 0.00 |        |
| AK006677 | 0          | 0.00 |        |
| AK006690 | 0          | 0.00 |        |
| AK006701 | 0          | 0.00 |        |
| AK006702 | 0          | 0.00 |        |
| AK006706 | 0          | 0.00 |        |
| AK006709 | 0          | 0.00 |        |
| AK006725 | 0.0130054  | 0.02 | 141.4% |
| AK006730 | 0.03471526 | 0.05 | 137.5% |
| AK006734 | 0.17934958 | 0.11 | 62.6%  |
| AK006738 | 0          | 0.00 |        |
| AK006748 | 0.2509304  | 0.12 | 48.9%  |
| AK006752 | 0.04888076 | 0.09 | 185.7% |
| AK006756 | 0          | 0.00 |        |
| AK006766 | 0          | 0.00 |        |
| AK006768 | 0          | 0.00 |        |
| AK006782 | 0          | 0.00 |        |
| AK006812 | 0.00640402 | 0.01 | 223.6% |
| AK006824 | 0          | 0.00 |        |
| AK006831 | 0.05395912 | 0.02 | 29.6%  |
| AK006839 | 0.02945846 | 0.03 | 91.7%  |
| AK006844 | 0          | 0.00 |        |
| AK006852 | 0          | 0.00 |        |
| AK006859 | 0          | 0.00 |        |
| AK006870 | 0          | 0.00 |        |
| AK006884 | 0.06659024 | 0.07 | 111.9% |
| AK006889 | 0.11901528 | 0.06 | 50.7%  |
| AK006894 | 0          | 0.00 |        |
| AK006895 | 0.1560874  | 0.10 | 66.6%  |
| AK006896 | 0          | 0.00 |        |
| AK006899 | 0          | 0.00 |        |
| AK006906 | 5.428264   | 0.28 | 5.2%   |
| AK006909 | 0          | 0.00 |        |
| AK006921 | 0.0022477  | 0.01 | 223.6% |
| AK006923 | 0          | 0.00 |        |
| AK006930 | 0          | 0.00 |        |
| AK006933 | 0.06236384 | 0.06 | 103.2% |



|          |            |      |        |
|----------|------------|------|--------|
| AK006934 | 0          | 0.00 |        |
| AK006937 | 0          | 0.00 |        |
| AK006941 | 0.3351852  | 0.27 | 79.1%  |
| AK006942 | 0          | 0.00 |        |
| AK006947 | 0          | 0.00 |        |
| AK006958 | 0          | 0.00 |        |
| AK006961 | 0          | 0.00 |        |
| AK006968 | 0          | 0.00 |        |
| AK006971 | 0          | 0.00 |        |
| AK006973 | 0.10709264 | 0.03 | 32.5%  |
| AK006978 | 0          | 0.00 |        |
| AK006980 | 0.0202271  | 0.02 | 97.5%  |
| AK006988 | 0.5098092  | 0.28 | 54.1%  |
| AK006990 | 0.212649   | 0.06 | 28.1%  |
| AK006991 | 0          | 0.00 |        |
| AK006996 | 0          | 0.00 |        |
| AK006997 | 0          | 0.00 |        |
| AK007006 | 0          | 0.00 |        |
| AK007011 | 0.688814   | 0.12 | 17.7%  |
| AK007020 | 2.10944    | 0.29 | 13.5%  |
| AK007025 | 0          | 0.00 |        |
| AK007030 | 0          | 0.00 |        |
| AK007038 | 0          | 0.00 |        |
| AK007041 | 0          | 0.00 |        |
| AK007042 | 0          | 0.00 |        |
| AK007043 | 0.04182156 | 0.06 | 152.5% |
| AK007073 | 0          | 0.00 |        |
| AK007082 | 0.13080512 | 0.06 | 43.6%  |
| AK007083 | 0          | 0.00 |        |
| AK007084 | 0          | 0.00 |        |
| AK007092 | 0.04860142 | 0.03 | 59.6%  |
| AK007095 | 0          | 0.00 |        |
| AK007100 | 0.29716578 | 0.48 | 161.0% |
| AK007102 | 0          | 0.00 |        |
| AK007110 | 0          | 0.00 |        |
| AK007112 | 0          | 0.00 |        |
| AK007116 | 0          | 0.00 |        |
| AK007118 | 0.00859428 | 0.02 | 223.6% |
| AK007133 | 0          | 0.00 |        |
| AK007137 | 0          | 0.00 |        |
| AK007148 | 0.07557648 | 0.03 | 45.4%  |
| AK007149 | 0.06568994 | 0.07 | 111.8% |
| AK007151 | 0          | 0.00 |        |
| AK007154 | 0.2749464  | 0.06 | 22.7%  |
| AK007159 | 0.00430558 | 0.01 | 223.6% |
| AK007162 | 0.10056314 | 0.13 | 133.7% |
| AK007165 | 0.839788   | 0.26 | 30.8%  |

|          |            |      |        |
|----------|------------|------|--------|
| AK007174 | 0.12732548 | 0.05 | 41.7%  |
| AK007175 | 0.04117902 | 0.04 | 99.5%  |
| AK007185 | 0          | 0.00 |        |
| AK007191 | 0.8759392  | 0.93 | 106.1% |
| AK007204 | 0          | 0.00 |        |
| AK007205 | 0          | 0.00 |        |
| AK007210 | 0.14945732 | 0.07 | 44.1%  |
| AK007214 | 0          | 0.00 |        |
| AK007216 | 0          | 0.00 |        |
| AK007218 | 3.741236   | 0.46 | 12.4%  |
| AK007221 | 0.176609   | 0.12 | 66.8%  |
| AK007223 | 0.4439562  | 0.10 | 23.6%  |
| AK007237 | 0.06925846 | 0.05 | 68.0%  |
| AK007238 | 0          | 0.00 |        |
| AK007249 | 0.12061702 | 0.05 | 40.3%  |
| AK007253 | 0.01332068 | 0.03 | 223.6% |
| AK007255 | 0.4090506  | 0.11 | 27.4%  |
| AK007260 | 0          | 0.00 |        |
| AK007274 | 0          | 0.00 |        |
| AK007280 | 0.00998208 | 0.02 | 223.6% |
| AK007290 | 0          | 0.00 |        |
| AK007305 | 0          | 0.00 |        |
| AK007312 | 0          | 0.00 |        |
| AK007349 | 0          | 0.00 |        |
| AK007351 | 43.76992   | 4.94 | 11.3%  |
| AK007373 | 4.448104   | 1.00 | 22.5%  |
| AK007376 | 0          | 0.00 |        |
| AK007416 | 0.02410514 | 0.02 | 96.0%  |
| AK007434 | 0          | 0.00 |        |
| AK007436 | 1.111265   | 0.37 | 33.1%  |
| AK007459 | 5.7933     | 0.73 | 12.6%  |
| AK007460 | 0.16305134 | 0.15 | 90.2%  |
| AK007490 | 2.1272412  | 1.33 | 62.6%  |
| AK007531 | 0          | 0.00 |        |
| AK007545 | 0.02205462 | 0.02 | 102.0% |
| AK007571 | 0.3059576  | 0.11 | 36.6%  |
| AK007586 | 0.2375086  | 0.11 | 46.3%  |
| AK007597 | 35.28212   | 1.77 | 5.0%   |
| AK007605 | 0.7058602  | 0.21 | 30.4%  |
| AK007719 | 2.154426   | 0.23 | 10.9%  |
| AK007756 | 5.99921    | 0.64 | 10.7%  |
| AK007770 | 0.8929198  | 0.20 | 22.5%  |
| AK007818 | 0          | 0.00 |        |
| AK007819 | 0.0091446  | 0.01 | 94.9%  |
| AK007836 | 0.23118008 | 0.12 | 50.6%  |
| AK007845 | 0          | 0.00 |        |
| AK007853 | 0.06314466 | 0.05 | 86.8%  |

|          |            |      |        |
|----------|------------|------|--------|
| AK007854 | 0          | 0.00 |        |
| AK007898 | 1.2346752  | 0.38 | 31.0%  |
| AK007899 | 0.01061848 | 0.02 | 223.6% |
| AK007907 | 0.11658896 | 0.09 | 79.9%  |
| AK007938 | 0.2337876  | 0.07 | 31.9%  |
| AK007947 | 0          | 0.00 |        |
| AK007971 | 1.401274   | 0.17 | 12.1%  |
| AK007998 | 1.771208   | 0.22 | 12.5%  |
| AK008014 | 1.342682   | 0.16 | 11.9%  |
| AK008044 | 0.4162626  | 0.08 | 18.1%  |
| AK008073 | 0          | 0.00 |        |
| AK008077 | 1.050947   | 0.36 | 34.1%  |
| AK008166 | 0.0313503  | 0.04 | 142.8% |
| AK008222 | 0          | 0.00 |        |
| AK008237 | 1.713702   | 0.35 | 20.5%  |
| AK008288 | 0.0224748  | 0.05 | 223.6% |
| AK008334 | 0.02380406 | 0.02 | 93.9%  |
| AK008341 | 1.0598242  | 0.60 | 56.8%  |
| AK008384 | 0.01856478 | 0.03 | 141.7% |
| AK008417 | 15.731     | 1.69 | 10.7%  |
| AK008432 | 0          | 0.00 |        |
| AK008458 | 3.054302   | 0.78 | 25.5%  |
| AK008482 | 0          | 0.00 |        |
| AK008488 | 0          | 0.00 |        |
| AK008496 | 0          | 0.00 |        |
| AK008545 | 0.15077034 | 0.14 | 90.8%  |
| AK008560 | 0          | 0.00 |        |
| AK008572 | 0.0168954  | 0.02 | 137.0% |
| AK008586 | 16.5436    | 0.81 | 4.9%   |
| AK008665 | 10.037228  | 1.30 | 12.9%  |
| AK008705 | 1.250158   | 0.14 | 10.9%  |
| AK008724 | 47.79814   | 1.08 | 2.3%   |
| AK008755 | 0.00744388 | 0.01 | 137.8% |
| AK008767 | 0          | 0.00 |        |
| AK008813 | 6.009458   | 0.36 | 5.9%   |
| AK008826 | 0          | 0.00 |        |
| AK008833 | 0.2992024  | 0.13 | 43.1%  |
| AK008852 | 1.5867074  | 0.99 | 62.3%  |
| AK008856 | 8.683862   | 0.87 | 10.0%  |
| AK008866 | 5.729022   | 0.57 | 10.0%  |
| AK008907 | 0.146174   | 0.10 | 65.2%  |
| AK008921 | 0          | 0.00 |        |
| AK008969 | 0.4399318  | 0.12 | 27.8%  |
| AK009046 | 6.380438   | 1.34 | 20.9%  |
| AK009064 | 0.1354295  | 0.10 | 71.7%  |
| AK009067 | 0          | 0.00 |        |
| AK009121 | 0.14582614 | 0.04 | 26.6%  |

|          |             |      |        |
|----------|-------------|------|--------|
| AK009175 | 12.09162    | 0.63 | 5.2%   |
| AK009188 | 0.00649388  | 0.01 | 223.6% |
| AK009198 | 1.728074    | 0.27 | 15.8%  |
| AK009214 | 0.0205986   | 0.05 | 223.6% |
| AK009335 | 0.2603056   | 0.07 | 27.4%  |
| AK009348 | 0.7592794   | 0.41 | 53.5%  |
| AK009351 | 0.05192044  | 0.05 | 99.6%  |
| AK009365 | 65.0618     | 4.42 | 6.8%   |
| AK009368 | 0.15047342  | 0.08 | 56.0%  |
| AK009383 | 0           | 0.00 |        |
| AK009395 | 4.640192    | 0.20 | 4.4%   |
| AK009597 | 0.05035236  | 0.04 | 76.6%  |
| AK009603 | 3.341024    | 0.60 | 17.8%  |
| AK009689 | 0           | 0.00 |        |
| AK009724 | 0.11706408  | 0.08 | 70.5%  |
| AK009784 | 0.02105468  | 0.02 | 93.9%  |
| AK009785 | 0.1484154   | 0.04 | 29.6%  |
| AK009788 | 18.17098    | 0.62 | 3.4%   |
| AK009813 | 0.251174    | 0.14 | 57.6%  |
| AK009829 | 1.5030836   | 0.96 | 64.1%  |
| AK009869 | 0.35117402  | 0.21 | 60.1%  |
| AK009887 | 2.971344    | 0.75 | 25.3%  |
| AK009897 | 0           | 0.00 |        |
| AK009900 | 0.0063127   | 0.01 | 223.6% |
| AK009977 | 0.11278766  | 0.02 | 21.0%  |
| AK010044 | 0.009366698 | 0.00 | 45.6%  |
| AK010122 | 0           | 0.00 |        |
| AK010129 | 0.2762536   | 0.12 | 44.2%  |
| AK010195 | 0.0517045   | 0.04 | 82.8%  |
| AK010245 | 0.02867088  | 0.03 | 93.8%  |
| AK010366 | 4.945212    | 0.41 | 8.3%   |
| AK010368 | 0.8830848   | 0.23 | 26.5%  |
| AK010390 | 0.0370195   | 0.03 | 68.3%  |
| AK010403 | 4.029412    | 0.69 | 17.2%  |
| AK010406 | 0.03945194  | 0.03 | 80.5%  |
| AK010427 | 41.14768    | 2.00 | 4.8%   |
| AK010542 | 0.02349716  | 0.04 | 156.1% |
| AK010638 | 0.04471724  | 0.01 | 26.0%  |
| AK010729 | 0.1972416   | 0.14 | 70.0%  |
| AK010767 | 0           | 0.00 |        |
| AK010770 | 0.03450018  | 0.02 | 62.7%  |
| AK010774 | 0.04433984  | 0.05 | 107.4% |
| AK010793 | 1.0673714   | 0.17 | 15.5%  |
| AK010824 | 0.04782124  | 0.03 | 61.0%  |
| AK010870 | 1.72215     | 0.15 | 8.9%   |
| AK010894 | 0.1275062   | 0.10 | 77.9%  |
| AK010897 | 0           | 0.00 |        |

|          |             |      |        |
|----------|-------------|------|--------|
| AK011021 | 2.182706    | 0.49 | 22.5%  |
| AK011120 | 0.324011    | 0.06 | 19.2%  |
| AK011205 | 15.14762    | 0.87 | 5.7%   |
| AK011222 | 0.2906354   | 0.04 | 15.3%  |
| AK011283 | 3.787042    | 0.32 | 8.5%   |
| AK011326 | 0.3083408   | 0.11 | 35.2%  |
| AK011408 | 0.0504394   | 0.11 | 223.6% |
| AK011444 | 0.5866234   | 0.16 | 27.5%  |
| AK011460 | 7.547172    | 0.82 | 10.9%  |
| AK011479 | 0.3661176   | 0.07 | 18.2%  |
| AK011482 | 0.0281397   | 0.03 | 94.9%  |
| AK011498 | 3.780422    | 0.39 | 10.4%  |
| AK011524 | 3.195276    | 0.21 | 6.5%   |
| AK011549 | 3.838858    | 1.65 | 42.9%  |
| AK011568 | 0.1332114   | 0.03 | 23.1%  |
| AK011682 | 0.8729026   | 0.39 | 44.8%  |
| AK011684 | 0.4312988   | 0.25 | 56.9%  |
| AK011693 | 0.16286664  | 0.04 | 24.9%  |
| AK011865 | 12.31404    | 0.98 | 8.0%   |
| AK011877 | 0.0053195   | 0.01 | 223.6% |
| AK011879 | 0.07355466  | 0.03 | 42.0%  |
| AK011885 | 5.638432    | 0.37 | 6.6%   |
| AK011897 | 0.05439756  | 0.02 | 40.6%  |
| AK011913 | 0.327993    | 0.04 | 11.3%  |
| AK011997 | 3.285714    | 0.62 | 18.9%  |
| AK012007 | 0.1432332   | 0.02 | 14.7%  |
| AK012035 | 3.385896    | 0.31 | 9.1%   |
| AK012135 | 0.5410746   | 0.11 | 19.7%  |
| AK012142 | 0.869138    | 0.18 | 20.4%  |
| AK012157 | 0.03186798  | 0.02 | 72.3%  |
| AK012214 | 0.1279829   | 0.07 | 54.5%  |
| AK012226 | 0.028176224 | 0.03 | 95.1%  |
| AK012238 | 0.0775943   | 0.05 | 66.7%  |
| AK012278 | 2.826688    | 0.41 | 14.6%  |
| AK012325 | 1.821456    | 0.49 | 27.1%  |
| AK012381 | 0.01385506  | 0.01 | 96.3%  |
| AK012387 | 0.3891968   | 0.18 | 45.3%  |
| AK012418 | 0.07456938  | 0.02 | 25.6%  |
| AK012506 | 1.495026    | 0.13 | 9.0%   |
| AK012546 | 16.0201     | 1.22 | 7.6%   |
| AK012547 | 0.4792142   | 0.18 | 37.0%  |
| AK012572 | 2.404332    | 0.91 | 37.8%  |
| AK012595 | 7.760766    | 0.69 | 8.9%   |
| AK012623 | 0.32064178  | 0.26 | 81.4%  |
| AK012661 | 0           | 0.00 |        |
| AK012713 | 7.456488    | 1.11 | 14.9%  |
| AK012776 | 7.02422     | 0.44 | 6.2%   |

|          |             |      |        |
|----------|-------------|------|--------|
| AK012841 | 3.290284    | 0.29 | 8.7%   |
| AK012857 | 11.5646     | 0.65 | 5.6%   |
| AK012891 | 0.3703064   | 0.18 | 48.2%  |
| AK012899 | 0.09183414  | 0.08 | 89.3%  |
| AK012900 | 0.14096512  | 0.08 | 55.5%  |
| AK012955 | 0.095434024 | 0.07 | 71.8%  |
| AK012972 | 0.07581832  | 0.04 | 56.3%  |
| AK013046 | 0.4149068   | 0.14 | 34.2%  |
| AK013162 | 10.9127     | 2.06 | 18.9%  |
| AK013187 | 0.1345872   | 0.10 | 72.1%  |
| AK013191 | 0.09871166  | 0.04 | 43.9%  |
| AK013290 | 0.06320578  | 0.01 | 20.3%  |
| AK013293 | 0.01178472  | 0.03 | 223.6% |
| AK013308 | 0.29661408  | 0.17 | 56.6%  |
| AK013354 | 3.770206    | 0.56 | 14.9%  |
| AK013356 | 1.550392    | 0.18 | 11.4%  |
| AK013372 | 0           | 0.00 |        |
| AK013380 | 0.617432    | 0.15 | 23.9%  |
| AK013453 | 2.239138    | 0.26 | 11.7%  |
| AK013472 | 0.3899478   | 0.15 | 38.2%  |
| AK013480 | 0.2551062   | 0.08 | 31.6%  |
| AK013506 | 0.6860892   | 0.38 | 56.0%  |
| AK013557 | 26.28158    | 0.89 | 3.4%   |
| AK013564 | 1.31274     | 0.15 | 11.1%  |
| AK013593 | 2.674796    | 0.53 | 19.8%  |
| AK013627 | 0           | 0.00 |        |
| AK013632 | 0.1692752   | 0.04 | 21.3%  |
| AK013680 | 0.12964186  | 0.16 | 121.2% |
| AK013687 | 0.09351608  | 0.06 | 65.5%  |
| AK013712 | 0.09313576  | 0.02 | 26.3%  |
| AK013794 | 2.399744    | 0.33 | 13.6%  |
| AK013806 | 3.64521     | 0.55 | 15.0%  |
| AK013818 | 0.3923076   | 0.16 | 40.4%  |
| AK013876 | 0.8192554   | 0.18 | 21.4%  |
| AK013883 | 9.48196     | 0.93 | 9.8%   |
| AK013936 | 21.19714    | 1.41 | 6.7%   |
| AK014028 | 0           | 0.00 |        |
| AK014032 | 0.38745398  | 0.53 | 136.1% |
| AK014089 | 1.324722    | 0.15 | 11.0%  |
| AK014098 | 1.586708    | 0.16 | 10.1%  |
| AK014119 | 0.19519352  | 0.17 | 84.8%  |
| AK014147 | 0.2536644   | 0.07 | 29.1%  |
| AK014177 | 0.38962368  | 0.53 | 135.7% |
| AK014209 | 0.9538932   | 0.26 | 27.2%  |
| AK014224 | 2.607316    | 0.67 | 25.8%  |
| AK014273 | 0.913195    | 0.30 | 33.0%  |
| AK014378 | 2.79473     | 0.57 | 20.5%  |

|          |             |      |        |
|----------|-------------|------|--------|
| AK014409 | 0.03274566  | 0.02 | 63.7%  |
| AK014435 | 0.427738    | 0.16 | 36.9%  |
| AK014460 | 0.006400318 | 0.01 | 152.9% |
| AK014513 | 0           | 0.00 |        |
| AK014573 | 0.01552434  | 0.02 | 139.4% |
| AK014626 | 0.00272224  | 0.01 | 223.6% |
| AK014646 | 19.12232    | 0.48 | 2.5%   |
| AK014660 | 0.13756942  | 0.06 | 45.2%  |
| AK014677 | 0           | 0.00 |        |
| AK014683 | 0.05240358  | 0.05 | 94.2%  |
| AK014704 | 0.0134014   | 0.02 | 137.0% |
| AK014713 | 0           | 0.00 |        |
| AK014726 | 0.06269504  | 0.08 | 120.5% |
| AK014752 | 0.10413536  | 0.04 | 40.1%  |
| AK014786 | 0           | 0.00 |        |
| AK014798 | 0.15151878  | 0.04 | 28.9%  |
| AK014841 | 0           | 0.00 |        |
| AK014857 | 0           | 0.00 |        |
| AK014882 | 0.00416142  | 0.01 | 223.6% |
| AK014951 | 0.0048448   | 0.01 | 223.6% |
| AK014955 | 0.4299584   | 0.13 | 29.2%  |
| AK014957 | 0           | 0.00 |        |
| AK014964 | 0.08950442  | 0.04 | 49.7%  |
| AK014969 | 0           | 0.00 |        |
| AK014974 | 1.2507262   | 0.41 | 32.8%  |
| AK014981 | 0.02697998  | 0.02 | 63.7%  |
| AK014986 | 0.2636968   | 0.13 | 49.2%  |
| AK014992 | 0           | 0.00 |        |
| AK014999 | 0           | 0.00 |        |
| AK015004 | 0.20227476  | 0.07 | 35.6%  |
| AK015045 | 0           | 0.00 |        |
| AK015051 | 0.2441764   | 0.03 | 13.6%  |
| AK015063 | 0.02184464  | 0.02 | 70.9%  |
| AK015072 | 0           | 0.00 |        |
| AK015079 | 0           | 0.00 |        |
| AK015092 | 0.3226354   | 0.06 | 19.6%  |
| AK015094 | 0           | 0.00 |        |
| AK015096 | 0.4543496   | 0.17 | 38.2%  |
| AK015099 | 0           | 0.00 |        |
| AK015100 | 1.198368    | 0.11 | 9.6%   |
| AK015105 | 0           | 0.00 |        |
| AK015107 | 0           | 0.00 |        |
| AK015118 | 0           | 0.00 |        |
| AK015136 | 1.772918    | 0.18 | 10.1%  |
| AK015174 | 0.00846962  | 0.02 | 223.6% |
| AK015179 | 4.95259     | 0.21 | 4.2%   |
| AK015183 | 0.6167518   | 0.24 | 39.4%  |

|          |             |      |        |
|----------|-------------|------|--------|
| AK015188 | 0           | 0.00 |        |
| AK015191 | 0           | 0.00 |        |
| AK015198 | 0           | 0.00 |        |
| AK015200 | 0           | 0.00 |        |
| AK015203 | 0.00658056  | 0.01 | 223.6% |
| AK015208 | 0           | 0.00 |        |
| AK015214 | 0.19543162  | 0.16 | 83.8%  |
| AK015219 | 0           | 0.00 |        |
| AK015225 | 1.0567354   | 0.34 | 31.9%  |
| AK015227 | 0           | 0.00 |        |
| AK015236 | 0           | 0.00 |        |
| AK015257 | 0.02018032  | 0.03 | 147.7% |
| AK015270 | 1.0085474   | 0.15 | 14.5%  |
| AK015277 | 0           | 0.00 |        |
| AK015279 | 0.00756734  | 0.01 | 137.0% |
| AK015284 | 0           | 0.00 |        |
| AK015289 | 0.0138837   | 0.01 | 105.2% |
| AK015306 | 0           | 0.00 |        |
| AK015316 | 0           | 0.00 |        |
| AK015322 | 0           | 0.00 |        |
| AK015324 | 0           | 0.00 |        |
| AK015336 | 0           | 0.00 |        |
| AK015341 | 0.01168408  | 0.02 | 142.4% |
| AK015347 | 0           | 0.00 |        |
| AK015360 | 0.03453652  | 0.03 | 75.4%  |
| AK015363 | 0           | 0.00 |        |
| AK015373 | 0           | 0.00 |        |
| AK015376 | 0           | 0.00 |        |
| AK015378 | 0           | 0.00 |        |
| AK015379 | 0.01722954  | 0.02 | 139.1% |
| AK015384 | 0.09640236  | 0.03 | 28.5%  |
| AK015392 | 0.5214254   | 0.09 | 17.9%  |
| AK015395 | 0           | 0.00 |        |
| AK015404 | 0.01493892  | 0.02 | 161.9% |
| AK015408 | 0.8671878   | 0.21 | 24.6%  |
| AK015409 | 0           | 0.00 |        |
| AK015413 | 0           | 0.00 |        |
| AK015421 | 0.041187414 | 0.05 | 112.5% |
| AK015423 | 0           | 0.00 |        |
| AK015428 | 0           | 0.00 |        |
| AK015429 | 0           | 0.00 |        |
| AK015444 | 0           | 0.00 |        |
| AK015457 | 0           | 0.00 |        |
| AK015458 | 0           | 0.00 |        |
| AK015463 | 0           | 0.00 |        |
| AK015470 | 0           | 0.00 |        |
| AK015475 | 0           | 0.00 |        |



|          |            |      |        |
|----------|------------|------|--------|
| AK015482 | 0          | 0.00 |        |
| AK015488 | 0          | 0.00 |        |
| AK015492 | 0.15966252 | 0.06 | 40.3%  |
| AK015493 | 0          | 0.00 |        |
| AK015504 | 0.2086954  | 0.07 | 31.7%  |
| AK015518 | 0          | 0.00 |        |
| AK015520 | 0          | 0.00 |        |
| AK015526 | 0          | 0.00 |        |
| AK015528 | 0.02672624 | 0.03 | 110.3% |
| AK015529 | 0.0860024  | 0.11 | 124.5% |
| AK015544 | 21.75404   | 0.57 | 2.6%   |
| AK015545 | 0.08547346 | 0.08 | 91.9%  |
| AK015552 | 0.22555908 | 0.16 | 68.8%  |
| AK015560 | 0.02986984 | 0.01 | 16.9%  |
| AK015562 | 0.09064424 | 0.05 | 57.4%  |
| AK015566 | 0.04282042 | 0.02 | 37.5%  |
| AK015581 | 0          | 0.00 |        |
| AK015607 | 0          | 0.00 |        |
| AK015608 | 0.00397358 | 0.01 | 223.6% |
| AK015610 | 0.01317858 | 0.02 | 137.3% |
| AK015611 | 1.973522   | 0.28 | 14.4%  |
| AK015615 | 0.01026652 | 0.01 | 109.5% |
| AK015628 | 0          | 0.00 |        |
| AK015651 | 0          | 0.00 |        |
| AK015657 | 0.08446654 | 0.05 | 58.1%  |
| AK015664 | 0          | 0.00 |        |
| AK015665 | 0.508404   | 0.23 | 44.6%  |
| AK015677 | 0          | 0.00 |        |
| AK015682 | 0.0549083  | 0.04 | 67.5%  |
| AK015703 | 0.03391004 | 0.02 | 60.1%  |
| AK015712 | 0.00618784 | 0.01 | 223.6% |
| AK015714 | 0.5015972  | 0.12 | 24.9%  |
| AK015741 | 0.00368128 | 0.01 | 223.6% |
| AK015749 | 0          | 0.00 |        |
| AK015753 | 0.00276126 | 0.01 | 223.6% |
| AK015755 | 0.4107978  | 0.05 | 11.9%  |
| AK015760 | 0          | 0.00 |        |
| AK015762 | 0          | 0.00 |        |
| AK015772 | 0          | 0.00 |        |
| AK015773 | 0.05603616 | 0.04 | 65.5%  |
| AK015782 | 0.022179   | 0.02 | 97.4%  |
| AK015792 | 0.852161   | 0.17 | 20.3%  |
| AK015810 | 0          | 0.00 |        |
| AK015813 | 0          | 0.00 |        |
| AK015814 | 0.14730724 | 0.03 | 19.2%  |
| AK015818 | 0          | 0.00 |        |
| AK015826 | 3.025458   | 0.25 | 8.3%   |

|          |             |      |        |
|----------|-------------|------|--------|
| AK015844 | 0           | 0.00 |        |
| AK015877 | 0           | 0.00 |        |
| AK015891 | 0           | 0.00 |        |
| AK015892 | 0           | 0.00 |        |
| AK015893 | 0.06049018  | 0.03 | 57.7%  |
| AK015900 | 0           | 0.00 |        |
| AK015904 | 0           | 0.00 |        |
| AK015907 | 0.09598566  | 0.05 | 50.5%  |
| AK015914 | 0           | 0.00 |        |
| AK015937 | 0           | 0.00 |        |
| AK015940 | 0           | 0.00 |        |
| AK015944 | 0           | 0.00 |        |
| AK015950 | 0           | 0.00 |        |
| AK015953 | 0           | 0.00 |        |
| AK015955 | 0.080219506 | 0.10 | 121.1% |
| AK015956 | 0.04547876  | 0.05 | 108.8% |
| AK015958 | 0           | 0.00 |        |
| AK015967 | 0.2338259   | 0.15 | 63.6%  |
| AK015969 | 0.3560678   | 0.23 | 65.8%  |
| AK015999 | 0.3923682   | 0.09 | 23.7%  |
| AK016002 | 0           | 0.00 |        |
| AK016007 | 0.08816764  | 0.02 | 17.7%  |
| AK016016 | 0           | 0.00 |        |
| AK016027 | 0           | 0.00 |        |
| AK016028 | 0           | 0.00 |        |
| AK016032 | 0           | 0.00 |        |
| AK016040 | 0           | 0.00 |        |
| AK016046 | 0           | 0.00 |        |
| AK016054 | 0           | 0.00 |        |
| AK016061 | 0.12595778  | 0.05 | 42.5%  |
| AK016071 | 0           | 0.00 |        |
| AK016077 | 0.08285492  | 0.05 | 58.4%  |
| AK016085 | 0.3171546   | 0.12 | 36.8%  |
| AK016097 | 0           | 0.00 |        |
| AK016100 | 0.00836758  | 0.02 | 223.6% |
| AK016120 | 0           | 0.00 |        |
| AK016128 | 0           | 0.00 |        |
| AK016129 | 0           | 0.00 |        |
| AK016131 | 0.01055888  | 0.02 | 223.6% |
| AK016150 | 0.03391016  | 0.06 | 174.9% |
| AK016162 | 0.03495896  | 0.01 | 20.2%  |
| AK016163 | 0           | 0.00 |        |
| AK016172 | 0           | 0.00 |        |
| AK016177 | 0.07561938  | 0.03 | 42.9%  |
| AK016178 | 0.01160156  | 0.02 | 137.2% |
| AK016179 | 0.01269474  | 0.02 | 141.2% |
| AK016185 | 16.41716    | 2.55 | 15.5%  |

|          |             |      |        |
|----------|-------------|------|--------|
| AK016192 | 0.00965684  | 0.02 | 223.6% |
| AK016207 | 0           | 0.00 |        |
| AK016225 | 0.00532238  | 0.01 | 223.6% |
| AK016243 | 0           | 0.00 |        |
| AK016244 | 0           | 0.00 |        |
| AK016251 | 0.01127208  | 0.01 | 64.3%  |
| AK016265 | 0.12974208  | 0.08 | 58.0%  |
| AK016276 | 0.00632094  | 0.01 | 223.6% |
| AK016280 | 0           | 0.00 |        |
| AK016281 | 0           | 0.00 |        |
| AK016283 | 0           | 0.00 |        |
| AK016284 | 0.01557158  | 0.03 | 223.6% |
| AK016307 | 0.02690118  | 0.03 | 108.7% |
| AK016318 | 0           | 0.00 |        |
| AK016328 | 0.031586686 | 0.04 | 130.6% |
| AK016332 | 0           | 0.00 |        |
| AK016335 | 0.01213834  | 0.03 | 223.6% |
| AK016336 | 0.4437088   | 0.15 | 32.8%  |
| AK016343 | 0.0211558   | 0.05 | 223.6% |
| AK016345 | 0           | 0.00 |        |
| AK016349 | 0           | 0.00 |        |
| AK016361 | 0           | 0.00 |        |
| AK016372 | 0           | 0.00 |        |
| AK016377 | 0.00971836  | 0.02 | 223.6% |
| AK016383 | 0           | 0.00 |        |
| AK016386 | 0           | 0.00 |        |
| AK016388 | 0.02021846  | 0.03 | 147.3% |
| AK016393 | 0           | 0.00 |        |
| AK016399 | 0           | 0.00 |        |
| AK016412 | 0           | 0.00 |        |
| AK016413 | 0           | 0.00 |        |
| AK016417 | 0.12940296  | 0.08 | 60.5%  |
| AK016427 | 0.00594406  | 0.01 | 223.6% |
| AK016430 | 2.057906    | 0.26 | 12.6%  |
| AK016444 | 0.03738322  | 0.03 | 67.5%  |
| AK016452 | 0.1098288   | 0.12 | 113.2% |
| AK016496 | 0.09283962  | 0.04 | 41.1%  |
| AK016511 | 0.06817442  | 0.05 | 67.7%  |
| AK016513 | 0.062022    | 0.05 | 87.2%  |
| AK016521 | 0.010079118 | 0.01 | 119.4% |
| AK016549 | 0.11350282  | 0.07 | 58.3%  |
| AK016580 | 0.2450546   | 0.08 | 32.8%  |
| AK016584 | 0.10781052  | 0.02 | 22.7%  |
| AK016591 | 0.20207048  | 0.08 | 38.9%  |
| AK016592 | 0.0025974   | 0.01 | 223.6% |
| AK016594 | 0           | 0.00 |        |
| AK016605 | 0           | 0.00 |        |

|          |             |      |        |
|----------|-------------|------|--------|
| AK016630 | 0.06646982  | 0.05 | 77.2%  |
| AK016650 | 0           | 0.00 |        |
| AK016658 | 0           | 0.00 |        |
| AK016661 | 0.0272945   | 0.02 | 84.1%  |
| AK016682 | 0.3425202   | 0.05 | 14.7%  |
| AK016686 | 0           | 0.00 |        |
| AK016693 | 0.3230984   | 0.12 | 36.7%  |
| AK016695 | 0.02325898  | 0.02 | 66.1%  |
| AK016696 | 0           | 0.00 |        |
| AK016730 | 0.3709592   | 0.11 | 30.4%  |
| AK016731 | 0           | 0.00 |        |
| AK016734 | 0           | 0.00 |        |
| AK016788 | 0.4338872   | 0.12 | 28.3%  |
| AK016790 | 0           | 0.00 |        |
| AK016808 | 0           | 0.00 |        |
| AK016813 | 0.0035746   | 0.01 | 223.6% |
| AK016833 | 0           | 0.00 |        |
| AK016836 | 0           | 0.00 |        |
| AK016837 | 0.5731618   | 0.13 | 23.0%  |
| AK016841 | 0.3138222   | 0.12 | 37.0%  |
| AK016887 | 0.03570056  | 0.01 | 29.1%  |
| AK016893 | 0.10145554  | 0.06 | 58.0%  |
| AK016898 | 0           | 0.00 |        |
| AK016914 | 0           | 0.00 |        |
| AK016926 | 0           | 0.00 |        |
| AK016931 | 0           | 0.00 |        |
| AK016948 | 0           | 0.00 |        |
| AK016961 | 0           | 0.00 |        |
| AK017006 | 0           | 0.00 |        |
| AK017010 | 0.25838758  | 0.57 | 220.5% |
| AK017025 | 0.00527286  | 0.01 | 223.6% |
| AK017040 | 0.0337626   | 0.03 | 74.3%  |
| AK017048 | 0           | 0.00 |        |
| AK017068 | 0           | 0.00 |        |
| AK017076 | 0.3843566   | 0.04 | 10.6%  |
| AK017085 | 0.118587562 | 0.14 | 118.5% |
| AK017086 | 0           | 0.00 |        |
| AK017092 | 0.6579112   | 0.12 | 17.7%  |
| AK017104 | 0           | 0.00 |        |
| AK017106 | 0           | 0.00 |        |
| AK017111 | 0           | 0.00 |        |
| AK017125 | 0.0050791   | 0.01 | 223.6% |
| AK017137 | 0.001557186 | 0.00 | 223.6% |
| AK017143 | 1.46763     | 0.12 | 8.2%   |
| AK017144 | 1.123132    | 0.10 | 8.7%   |
| AK017148 | 0           | 0.00 |        |
| AK017177 | 0.8895144   | 0.21 | 23.2%  |

|          |             |      |        |
|----------|-------------|------|--------|
| AK017182 | 0.04343178  | 0.05 | 121.3% |
| AK017199 | 0           | 0.00 |        |
| AK017220 | 0.05574584  | 0.03 | 58.3%  |
| AK017239 | 0.00438428  | 0.01 | 223.6% |
| AK017243 | 0.1844866   | 0.03 | 15.1%  |
| AK017262 | 0.0572111   | 0.03 | 51.1%  |
| AK017296 | 0.5164422   | 0.51 | 99.4%  |
| AK017306 | 0.02554408  | 0.03 | 108.0% |
| AK017316 | 4.935332    | 0.50 | 10.1%  |
| AK017331 | 0.04683084  | 0.01 | 28.8%  |
| AK017337 | 0           | 0.00 |        |
| AK017339 | 0           | 0.00 |        |
| AK017349 | 0           | 0.00 |        |
| AK017352 | 0           | 0.00 |        |
| AK017368 | 0.01650772  | 0.02 | 138.6% |
| AK017409 | 0.1822412   | 0.04 | 19.7%  |
| AK017430 | 0           | 0.00 |        |
| AK017440 | 123.004     | 1.13 | 0.9%   |
| AK017459 | 0.5340442   | 0.17 | 32.4%  |
| AK017500 | 1.1025622   | 0.29 | 26.4%  |
| AK017534 | 0.1677026   | 0.05 | 28.1%  |
| AK017586 | 0           | 0.00 |        |
| AK017620 | 0.00982002  | 0.02 | 223.6% |
| AK017634 | 0.29101798  | 0.16 | 53.6%  |
| AK017645 | 6.931566    | 0.55 | 7.9%   |
| AK017706 | 0.4776178   | 0.12 | 24.1%  |
| AK017756 | 0.09252932  | 0.06 | 65.8%  |
| AK017779 | 0.1797186   | 0.05 | 29.2%  |
| AK017784 | 0.15225496  | 0.11 | 74.6%  |
| AK017883 | 0.3895956   | 0.03 | 8.5%   |
| AK017891 | 0           | 0.00 |        |
| AK017893 | 0.04165062  | 0.03 | 68.1%  |
| AK017924 | 1.015489    | 0.15 | 14.9%  |
| AK018014 | 0           | 0.00 |        |
| AK018025 | 0           | 0.00 |        |
| AK018074 | 0.3297538   | 0.11 | 33.9%  |
| AK018104 | 34.70066    | 1.39 | 4.0%   |
| AK018134 | 6.361296    | 0.46 | 7.2%   |
| AK018156 | 0.9534742   | 0.14 | 14.6%  |
| AK018164 | 13.09646    | 0.87 | 6.7%   |
| AK018183 | 2.632136    | 0.45 | 17.1%  |
| AK018214 | 0.335896    | 0.09 | 26.0%  |
| AK018228 | 1.7716      | 0.23 | 12.8%  |
| AK018302 | 0.01414362  | 0.02 | 142.1% |
| AK018309 | 2.322524    | 0.39 | 16.9%  |
| AK018352 | 0           | 0.00 |        |
| AK018376 | 0.001334898 | 0.00 | 223.6% |

|          |            |        |        |
|----------|------------|--------|--------|
| AK018427 | 0.04332968 | 0.04   | 86.0%  |
| AK018435 | 0.5464352  | 0.15   | 26.8%  |
| AK018450 | 1.517262   | 0.26   | 17.0%  |
| AK018484 | 0.00935026 | 0.01   | 137.4% |
| AK018490 | 1.3534888  | 0.36   | 26.3%  |
| AK018513 | 0          | 0.00   |        |
| AK018584 | 9.158276   | 0.72   | 7.9%   |
| AK018624 | 0.0086205  | 0.02   | 223.6% |
| AK018679 | 69.594     | 1.69   | 2.4%   |
| AK018699 | 0          | 0.00   |        |
| AK018753 | 1960.482   | 249.50 | 12.7%  |
| AK018772 | 9.61717    | 1.78   | 18.5%  |
| AK018841 | 0          | 0.00   |        |
| AK018847 | 0          | 0.00   |        |
| AK018858 | 0          | 0.00   |        |
| AK018862 | 0.8494162  | 0.16   | 19.3%  |
| AK018866 | 0          | 0.00   |        |
| AK018879 | 0          | 0.00   |        |
| AK018880 | 0          | 0.00   |        |
| AK018891 | 0          | 0.00   |        |
| AK018902 | 0          | 0.00   |        |
| AK018905 | 0          | 0.00   |        |
| AK018908 | 0          | 0.00   |        |
| AK018911 | 0.06464738 | 0.02   | 35.5%  |
| AK018913 | 0.6397256  | 1.25   | 196.1% |
| AK018918 | 0.02975956 | 0.01   | 18.9%  |
| AK018924 | 0.0970356  | 0.06   | 56.9%  |
| AK018929 | 0.09706792 | 0.06   | 65.5%  |
| AK018934 | 0          | 0.00   |        |
| AK018937 | 0.00927812 | 0.02   | 223.6% |
| AK018940 | 0          | 0.00   |        |
| AK018946 | 0          | 0.00   |        |
| AK018948 | 0          | 0.00   |        |
| AK018959 | 0          | 0.00   |        |
| AK018965 | 0          | 0.00   |        |
| AK018967 | 0.6208894  | 0.19   | 29.9%  |
| AK018968 | 0          | 0.00   |        |
| AK018972 | 0          | 0.00   |        |
| AK018974 | 0          | 0.00   |        |
| AK018976 | 0          | 0.00   |        |
| AK018977 | 0          | 0.00   |        |
| AK018979 | 0          | 0.00   |        |
| AK018984 | 0.01728268 | 0.02   | 140.6% |
| AK018988 | 0.09769412 | 0.02   | 23.3%  |
| AK018990 | 0.02399384 | 0.03   | 105.9% |
| AK018991 | 0          | 0.00   |        |
| AK018993 | 0.1552222  | 0.04   | 27.3%  |

|          |             |      |        |
|----------|-------------|------|--------|
| AK018996 | 0.22557992  | 0.21 | 91.4%  |
| AK019003 | 0.937083    | 0.22 | 23.9%  |
| AK019015 | 0.456104    | 0.25 | 55.2%  |
| AK019031 | 0.14210828  | 0.12 | 86.2%  |
| AK019036 | 0           | 0.00 |        |
| AK019053 | 0.2200467   | 0.20 | 88.7%  |
| AK019057 | 0.01491666  | 0.03 | 223.6% |
| AK019067 | 0.6549338   | 0.27 | 40.9%  |
| AK019072 | 0           | 0.00 |        |
| AK019082 | 0.473133    | 0.21 | 44.9%  |
| AK019083 | 34.11176    | 4.24 | 12.4%  |
| AK019114 | 1.63669     | 0.41 | 25.3%  |
| AK019124 | 0           | 0.00 |        |
| AK019125 | 0           | 0.00 |        |
| AK019137 | 0.0459237   | 0.01 | 29.3%  |
| AK019154 | 9.851316    | 0.74 | 7.6%   |
| AK019229 | 1.1955924   | 0.22 | 18.7%  |
| AK019237 | 0.6311368   | 0.20 | 31.2%  |
| AK019250 | 0.0426763   | 0.03 | 69.0%  |
| AK019262 | 8.613756    | 0.80 | 9.2%   |
| AK019272 | 0.07189352  | 0.06 | 80.2%  |
| AK019286 | 2.998118    | 0.48 | 16.0%  |
| AK019290 | 0.2464866   | 0.23 | 92.5%  |
| AK019332 | 0.037885    | 0.04 | 94.7%  |
| AK019339 | 1.07145     | 0.25 | 23.3%  |
| AK019348 | 0.04273664  | 0.04 | 92.8%  |
| AK019365 | 0.9243412   | 0.43 | 46.7%  |
| AK019366 | 0.3123668   | 0.13 | 41.1%  |
| AK019375 | 0.02273968  | 0.03 | 138.2% |
| AK019388 | 60.0128     | 1.52 | 2.5%   |
| AK019420 | 41.58298    | 2.61 | 6.3%   |
| AK019435 | 0           | 0.00 |        |
| AK019455 | 0.001432624 | 0.00 | 223.6% |
| AK019514 | 0           | 0.00 |        |
| AK019536 | 2.986098    | 0.28 | 9.5%   |
| AK019538 | 0           | 0.00 |        |
| AK019541 | 0.01495046  | 0.02 | 138.1% |
| AK019561 | 0           | 0.00 |        |
| AK019563 | 0           | 0.00 |        |
| AK019573 | 0           | 0.00 |        |
| AK019585 | 0           | 0.00 |        |
| AK019592 | 0           | 0.00 |        |
| AK019593 | 0           | 0.00 |        |
| AK019596 | 0           | 0.00 |        |
| AK019598 | 0           | 0.00 |        |
| AK019601 | 0           | 0.00 |        |
| AK019604 | 0           | 0.00 |        |

|          |            |      |        |
|----------|------------|------|--------|
| AK019614 | 0.01723884 | 0.04 | 223.6% |
| AK019620 | 0          | 0.00 |        |
| AK019623 | 0.01732406 | 0.04 | 223.6% |
| AK019626 | 0          | 0.00 |        |
| AK019628 | 0          | 0.00 |        |
| AK019629 | 0          | 0.00 |        |
| AK019630 | 0.11965994 | 0.12 | 99.9%  |
| AK019631 | 0.1852524  | 0.17 | 90.9%  |
| AK019641 | 0          | 0.00 |        |
| AK019643 | 0          | 0.00 |        |
| AK019657 | 0          | 0.00 |        |
| AK019662 | 0          | 0.00 |        |
| AK019664 | 0.0750473  | 0.04 | 57.9%  |
| AK019667 | 0          | 0.00 |        |
| AK019672 | 0          | 0.00 |        |
| AK019679 | 0.03312614 | 0.02 | 52.0%  |
| AK019680 | 0.01949702 | 0.04 | 223.6% |
| AK019688 | 0          | 0.00 |        |
| AK019690 | 0.8705534  | 0.27 | 31.2%  |
| AK019691 | 0          | 0.00 |        |
| AK019697 | 0          | 0.00 |        |
| AK019698 | 0          | 0.00 |        |
| AK019699 | 0          | 0.00 |        |
| AK019701 | 0          | 0.00 |        |
| AK019704 | 0          | 0.00 |        |
| AK019709 | 0.04651782 | 0.04 | 78.7%  |
| AK019710 | 0          | 0.00 |        |
| AK019711 | 0          | 0.00 |        |
| AK019719 | 0.01423042 | 0.02 | 139.1% |
| AK019722 | 0.0549652  | 0.03 | 50.3%  |
| AK019723 | 0          | 0.00 |        |
| AK019729 | 0          | 0.00 |        |
| AK019730 | 0.4439416  | 0.16 | 36.2%  |
| AK019731 | 0          | 0.00 |        |
| AK019734 | 0          | 0.00 |        |
| AK019737 | 0          | 0.00 |        |
| AK019738 | 0.12476574 | 0.11 | 88.2%  |
| AK019743 | 0.779906   | 0.13 | 17.2%  |
| AK019745 | 0          | 0.00 |        |
| AK019751 | 0.00819354 | 0.02 | 223.6% |
| AK019752 | 0.04599244 | 0.02 | 44.5%  |
| AK019757 | 0.27437242 | 0.20 | 72.0%  |
| AK019772 | 0.094352   | 0.09 | 92.9%  |
| AK019773 | 0          | 0.00 |        |
| AK019774 | 0          | 0.00 |        |
| AK019781 | 0          | 0.00 |        |
| AK019789 | 0          | 0.00 |        |



|          |             |      |        |
|----------|-------------|------|--------|
| AK019790 | 0           | 0.00 |        |
| AK019792 | 0           | 0.00 |        |
| AK019796 | 0           | 0.00 |        |
| AK019797 | 0.00321622  | 0.01 | 223.6% |
| AK019798 | 0           | 0.00 |        |
| AK019801 | 0           | 0.00 |        |
| AK019804 | 0           | 0.00 |        |
| AK019810 | 0           | 0.00 |        |
| AK019812 | 0           | 0.00 |        |
| AK019818 | 0           | 0.00 |        |
| AK019824 | 0.3233492   | 0.06 | 18.8%  |
| AK019836 | 0           | 0.00 |        |
| AK019838 | 0           | 0.00 |        |
| AK019844 | 0           | 0.00 |        |
| AK019889 | 0           | 0.00 |        |
| AK019935 | 0.0399504   | 0.04 | 93.6%  |
| AK019949 | 0           | 0.00 |        |
| AK019984 | 0.002858382 | 0.00 | 167.2% |
| AK020025 | 0.07735218  | 0.14 | 182.6% |
| AK020043 | 0           | 0.00 |        |
| AK020054 | 0.07274648  | 0.06 | 80.2%  |
| AK020061 | 0           | 0.00 |        |
| AK020081 | 0           | 0.00 |        |
| AK020087 | 0.0997162   | 0.06 | 64.1%  |
| AK020089 | 0.2543246   | 0.10 | 37.9%  |
| AK020095 | 12.08942    | 0.98 | 8.1%   |
| AK020100 | 0.4904054   | 0.04 | 9.0%   |
| AK020101 | 0.0793087   | 0.02 | 27.5%  |
| AK020188 | 0           | 0.00 |        |
| AK020190 | 0           | 0.00 |        |
| AK020205 | 0.01979522  | 0.03 | 137.5% |
| AK020213 | 0.02327403  | 0.02 | 72.9%  |
| AK020235 | 0.01336338  | 0.02 | 141.6% |
| AK020236 | 0           | 0.00 |        |
| AK020256 | 0           | 0.00 |        |
| AK020276 | 0           | 0.00 |        |
| AK020309 | 0.00873042  | 0.02 | 223.6% |
| AK020320 | 0.04707872  | 0.05 | 97.2%  |
| AK020345 | 0           | 0.00 |        |
| AK020351 | 0.01160554  | 0.03 | 223.6% |
| AK020361 | 0.1540217   | 0.12 | 80.4%  |
| AK020388 | 0.11142922  | 0.02 | 17.5%  |
| AK020398 | 2.524516    | 0.34 | 13.3%  |
| AK020406 | 0.3391354   | 0.27 | 80.4%  |
| AK020462 | 0.8842122   | 0.23 | 26.0%  |
| AK020476 | 0.00291306  | 0.01 | 223.6% |
| AK020485 | 0           | 0.00 |        |

|          |             |      |        |
|----------|-------------|------|--------|
| AK020496 | 0.04722828  | 0.03 | 70.1%  |
| AK020502 | 1.1207458   | 0.16 | 14.3%  |
| AK020506 | 0.00427976  | 0.01 | 223.6% |
| AK020517 | 2.367752    | 0.26 | 11.2%  |
| AK020535 | 0           | 0.00 |        |
| AK020549 | 0.0196892   | 0.03 | 141.5% |
| AK020556 | 0           | 0.00 |        |
| AK020565 | 0.00516502  | 0.01 | 223.6% |
| AK020577 | 0           | 0.00 |        |
| AK020588 | 0.0043194   | 0.01 | 223.6% |
| AK020616 | 6.295096    | 0.23 | 3.6%   |
| AK020619 | 0.4469288   | 0.08 | 18.9%  |
| AK020628 | 0.3557986   | 0.16 | 44.3%  |
| AK020645 | 0.14857076  | 0.06 | 37.5%  |
| AK020680 | 0.00908362  | 0.02 | 223.6% |
| AK020688 | 10.095802   | 0.66 | 6.5%   |
| AK020705 | 0           | 0.00 |        |
| AK020722 | 0.9071918   | 0.20 | 22.0%  |
| AK020728 | 1.848086    | 0.35 | 18.9%  |
| AK020764 | 0           | 0.00 |        |
| AK020767 | 0.2615124   | 0.11 | 40.9%  |
| AK020768 | 0.009952822 | 0.01 | 72.0%  |
| AK020793 | 0.00914204  | 0.01 | 137.3% |
| AK020795 | 0.002604244 | 0.00 | 137.3% |
| AK020812 | 5.37196     | 0.74 | 13.8%  |
| AK020826 | 0.02640063  | 0.02 | 84.1%  |
| AK020829 | 0           | 0.00 |        |
| AK020834 | 0           | 0.00 |        |
| AK020835 | 38.03246    | 2.85 | 7.5%   |
| AK020854 | 0.00880946  | 0.02 | 223.6% |
| AK020861 | 0           | 0.00 |        |
| AK020867 | 0.1673168   | 0.03 | 16.1%  |
| AK020885 | 0           | 0.00 |        |
| AK020898 | 0.07415488  | 0.04 | 48.6%  |
| AK020914 | 0.00569936  | 0.01 | 223.6% |
| AK020919 | 0.05941206  | 0.05 | 80.0%  |
| AK020930 | 0.0083282   | 0.02 | 223.6% |
| AK020948 | 0.0355788   | 0.03 | 94.5%  |
| AK020962 | 0           | 0.00 |        |
| AK021003 | 0.28188392  | 0.21 | 73.6%  |
| AK021004 | 0.09730806  | 0.03 | 26.0%  |
| AK021007 | 1.1805808   | 0.39 | 32.7%  |
| AK021028 | 0.82625606  | 0.69 | 83.4%  |
| AK021029 | 0.1105496   | 0.01 | 7.6%   |
| AK021038 | 13.65512    | 1.39 | 10.2%  |
| AK021048 | 0.0215986   | 0.05 | 223.6% |
| AK021075 | 0           | 0.00 |        |

|          |             |      |        |
|----------|-------------|------|--------|
| AK021093 | 0           | 0.00 |        |
| AK021113 | 1.561276    | 0.16 | 10.6%  |
| AK021127 | 0.14785112  | 0.08 | 56.8%  |
| AK021128 | 0.01017104  | 0.02 | 223.6% |
| AK021143 | 4.15399     | 0.41 | 9.9%   |
| AK021144 | 5.586156    | 0.15 | 2.7%   |
| AK021178 | 0           | 0.00 |        |
| AK021191 | 0           | 0.00 |        |
| AK021192 | 0           | 0.00 |        |
| AK021197 | 1.74336     | 0.22 | 12.6%  |
| AK021198 | 0           | 0.00 |        |
| AK021199 | 0.2995238   | 0.06 | 20.0%  |
| AK021214 | 0.01634824  | 0.02 | 137.0% |
| AK021218 | 0           | 0.00 |        |
| AK021231 | 0.2069152   | 0.12 | 56.9%  |
| AK021232 | 0.02634936  | 0.01 | 42.5%  |
| AK021262 | 0.25634866  | 0.13 | 51.8%  |
| AK021280 | 15.26008    | 1.00 | 6.6%   |
| AK021297 | 0.3850846   | 0.13 | 34.3%  |
| AK021299 | 0.179399    | 0.05 | 27.5%  |
| AK021325 | 1.1546714   | 0.25 | 21.9%  |
| AK021336 | 0.07792966  | 0.06 | 74.4%  |
| AK021342 | 0.1713676   | 0.06 | 35.7%  |
| AK021368 | 1.1759444   | 0.27 | 23.4%  |
| AK021371 | 0.127156765 | 0.15 | 114.4% |
| AK021377 | 0.02998508  | 0.02 | 62.8%  |
| AK027905 | 0           | 0.00 |        |
| AK027928 | 0.01480256  | 0.02 | 137.8% |
| AK027935 | 0.09456086  | 0.18 | 189.8% |
| AK027941 | 45.10856    | 6.53 | 14.5%  |
| AK027957 | 1.1682388   | 0.21 | 18.2%  |
| AK027968 | 0           | 0.00 |        |
| AK027991 | 0.13621266  | 0.05 | 35.0%  |
| AK028005 | 0.0307926   | 0.02 | 59.1%  |
| AK028012 | 0.00845908  | 0.02 | 223.6% |
| AK028033 | 0           | 0.00 |        |
| AK028077 | 0.012313136 | 0.01 | 79.2%  |
| AK028088 | 0           | 0.00 |        |
| AK028089 | 0           | 0.00 |        |
| AK028094 | 0.00975676  | 0.02 | 223.6% |
| AK028111 | 0           | 0.00 |        |
| AK028130 | 0.02171768  | 0.03 | 139.2% |
| AK028224 | 1.1271024   | 0.47 | 41.9%  |
| AK028243 | 0.3150584   | 0.14 | 44.0%  |
| AK028383 | 4.885826    | 0.70 | 14.3%  |
| AK028394 | 0.77226028  | 0.70 | 90.1%  |
| AK028422 | 0           | 0.00 |        |

|          |             |      |        |
|----------|-------------|------|--------|
| AK028639 | 0.0024025   | 0.01 | 223.6% |
| AK028650 | 0.09828862  | 0.03 | 32.3%  |
| AK028711 | 0           | 0.00 |        |
| AK028767 | 2.48498     | 0.44 | 17.6%  |
| AK028773 | 0.010416078 | 0.01 | 77.1%  |
| AK028782 | 3.540312    | 0.78 | 22.2%  |
| AK028798 | 0.00224912  | 0.01 | 223.6% |
| AK028852 | 0.1876148   | 0.04 | 20.9%  |
| AK028920 | 0.4655524   | 0.06 | 13.2%  |
| AK029023 | 0.0147948   | 0.02 | 142.8% |
| AK029086 | 0.00511142  | 0.01 | 223.6% |
| AK029100 | 1.48399     | 0.18 | 11.9%  |
| AK029153 | 0.0028624   | 0.01 | 223.6% |
| AK029171 | 0.3305748   | 0.06 | 19.4%  |
| AK029258 | 0.08072696  | 0.03 | 33.1%  |
| AK029312 | 0           | 0.00 |        |
| AK029359 | 1.744152    | 0.39 | 22.6%  |
| AK029385 | 0           | 0.00 |        |
| AK029402 | 0.064216124 | 0.07 | 113.4% |
| AK029404 | 0           | 0.00 |        |
| AK029407 | 0.0105272   | 0.01 | 137.4% |
| AK029418 | 0.04998758  | 0.05 | 99.4%  |
| AK029443 | 0.2515612   | 0.10 | 40.1%  |
| AK029473 | 0.7283686   | 0.16 | 22.1%  |
| AK029503 | 0.00259354  | 0.01 | 223.6% |
| AK029536 | 0.0595853   | 0.02 | 31.9%  |
| AK029560 | 0           | 0.00 |        |
| AK029576 | 9.232144    | 0.41 | 4.5%   |
| AK029587 | 0           | 0.00 |        |
| AK029591 | 0.022915056 | 0.01 | 56.3%  |
| AK029596 | 0           | 0.00 |        |
| AK029598 | 0           | 0.00 |        |
| AK029599 | 0           | 0.00 |        |
| AK029605 | 0           | 0.00 |        |
| AK029614 | 0           | 0.00 |        |
| AK029620 | 0           | 0.00 |        |
| AK029624 | 0           | 0.00 |        |
| AK029630 | 0.06079498  | 0.04 | 61.0%  |
| AK029633 | 0.11274554  | 0.03 | 25.9%  |
| AK029637 | 0.07832216  | 0.08 | 103.4% |
| AK029638 | 0.0097819   | 0.02 | 223.6% |
| AK029641 | 0           | 0.00 |        |
| AK029643 | 0           | 0.00 |        |
| AK029646 | 0           | 0.00 |        |
| AK029660 | 0           | 0.00 |        |
| AK029663 | 0.0688578   | 0.10 | 140.8% |
| AK029672 | 0           | 0.00 |        |

|          |             |      |        |
|----------|-------------|------|--------|
| AK029692 | 0           | 0.00 |        |
| AK029726 | 0.11058572  | 0.01 | 12.9%  |
| AK029746 | 0.09203118  | 0.04 | 40.3%  |
| AK029768 | 0           | 0.00 |        |
| AK029781 | 0           | 0.00 |        |
| AK029792 | 0           | 0.00 |        |
| AK029795 | 0           | 0.00 |        |
| AK029796 | 0.11228204  | 0.08 | 67.3%  |
| AK029831 | 4.890656    | 2.03 | 41.5%  |
| AK029834 | 0           | 0.00 |        |
| AK029857 | 0.331561    | 0.02 | 7.1%   |
| AK029860 | 0.3113868   | 0.05 | 15.4%  |
| AK029875 | 0.323803    | 0.07 | 21.2%  |
| AK029878 | 0.735237    | 0.11 | 15.1%  |
| AK029949 | 0           | 0.00 |        |
| AK029950 | 0.174372    | 0.02 | 10.9%  |
| AK029956 | 0.18150366  | 0.11 | 61.1%  |
| AK029958 | 0           | 0.00 |        |
| AK029959 | 0.9008998   | 0.12 | 13.0%  |
| AK030052 | 0           | 0.00 |        |
| AK030117 | 0.0099589   | 0.01 | 108.8% |
| AK030127 | 0.014703826 | 0.01 | 72.6%  |
| AK030128 | 0.02864736  | 0.02 | 70.9%  |
| AK030154 | 0           | 0.00 |        |
| AK030183 | 0           | 0.00 |        |
| AK030206 | 0.3152494   | 0.09 | 29.1%  |
| AK030230 | 0.01868528  | 0.01 | 47.2%  |
| AK030236 | 0.0292014   | 0.01 | 19.7%  |
| AK030238 | 0           | 0.00 |        |
| AK030251 | 0.5407236   | 0.25 | 46.1%  |
| AK030258 | 0.004526378 | 0.01 | 139.3% |
| AK030263 | 0           | 0.00 |        |
| AK030268 | 0           | 0.00 |        |
| AK030275 | 51.49292    | 3.88 | 7.5%   |
| AK030281 | 0.03241268  | 0.03 | 85.1%  |
| AK030285 | 0.2610564   | 0.08 | 30.0%  |
| AK030357 | 0.7756914   | 0.08 | 10.3%  |
| AK030361 | 0.6985688   | 0.23 | 33.3%  |
| AK030376 | 0.02722268  | 0.01 | 30.1%  |
| AK030448 | 0.06290512  | 0.04 | 66.8%  |
| AK030453 | 0.273442    | 0.06 | 22.5%  |
| AK030468 | 0.0323408   | 0.04 | 137.0% |
| AK030539 | 0.9797522   | 0.23 | 23.8%  |
| AK030561 | 0           | 0.00 |        |
| AK030600 | 4.369986    | 0.28 | 6.4%   |
| AK030646 | 3.752922    | 0.24 | 6.4%   |
| AK030763 | 2.069196    | 0.32 | 15.6%  |

|          |             |      |        |
|----------|-------------|------|--------|
| AK030770 | 0.00973491  | 0.01 | 138.5% |
| AK030777 | 0.6097054   | 0.17 | 27.5%  |
| AK030803 | 0           | 0.00 |        |
| AK030886 | 0.209718    | 0.06 | 26.6%  |
| AK030906 | 0.016923    | 0.01 | 69.5%  |
| AK030918 | 0.00685558  | 0.00 | 48.8%  |
| AK030920 | 0.1720366   | 0.04 | 25.3%  |
| AK030939 | 0.2457306   | 0.08 | 32.7%  |
| AK030946 | 2.243776    | 0.48 | 21.3%  |
| AK030979 | 0.6717398   | 0.11 | 16.0%  |
| AK031042 | 0.191803    | 0.05 | 24.1%  |
| AK031097 | 14.86764    | 0.29 | 1.9%   |
| AK031134 | 0.9306466   | 0.12 | 12.8%  |
| AK031165 | 0.4430444   | 0.19 | 42.3%  |
| AK031200 | 1.579106    | 0.40 | 25.4%  |
| AK031204 | 1.921058    | 0.27 | 13.8%  |
| AK031221 | 0.13678574  | 0.06 | 45.1%  |
| AK031234 | 2.347394    | 0.53 | 22.5%  |
| AK031278 | 0.7544806   | 0.11 | 14.2%  |
| AK031300 | 0.02908402  | 0.03 | 87.4%  |
| AK031301 | 0.163849    | 0.02 | 14.0%  |
| AK031332 | 0.07223226  | 0.01 | 7.0%   |
| AK031437 | 0.04388642  | 0.02 | 42.3%  |
| AK031460 | 0.10807606  | 0.05 | 47.4%  |
| AK031463 | 0.06029754  | 0.03 | 57.1%  |
| AK031468 | 0.2368794   | 0.04 | 15.7%  |
| AK031485 | 0.0295024   | 0.02 | 54.5%  |
| AK031498 | 0.4167444   | 0.06 | 13.5%  |
| AK031500 | 0.223298    | 0.08 | 35.5%  |
| AK031561 | 0.06918548  | 0.02 | 28.4%  |
| AK031641 | 0.22625596  | 0.09 | 40.3%  |
| AK031668 | 0.07534578  | 0.02 | 28.0%  |
| AK031770 | 0.03614252  | 0.02 | 57.0%  |
| AK031816 | 6.464984    | 0.13 | 2.0%   |
| AK031819 | 10.526302   | 0.87 | 8.3%   |
| AK031828 | 0           | 0.00 |        |
| AK031861 | 0.00548326  | 0.01 | 223.6% |
| AK031871 | 13.05904    | 0.61 | 4.7%   |
| AK031919 | 0.0168995   | 0.00 | 22.1%  |
| AK031964 | 16.62732    | 1.50 | 9.0%   |
| AK032024 | 1.402548    | 0.16 | 11.1%  |
| AK032118 | 0           | 0.00 |        |
| AK032180 | 0.001018468 | 0.00 | 223.6% |
| AK032194 | 0.2880702   | 0.06 | 21.3%  |
| AK032255 | 0.671466    | 0.26 | 38.3%  |
| AK032343 | 1.566724    | 0.30 | 18.9%  |
| AK032387 | 0.5569132   | 0.02 | 2.8%   |

|          |             |      |        |
|----------|-------------|------|--------|
| AK032401 | 12.75622    | 1.26 | 9.9%   |
| AK032457 | 0.2257814   | 0.08 | 34.0%  |
| AK032537 | 0.00101083  | 0.00 | 223.6% |
| AK032654 | 0.001152814 | 0.00 | 223.6% |
| AK032662 | 0.01774284  | 0.00 | 14.3%  |
| AK032746 | 0.7857636   | 0.04 | 5.1%   |
| AK032763 | 0           | 0.00 |        |
| AK032863 | 0.0780964   | 0.03 | 40.4%  |
| AK032919 | 0.04386678  | 0.02 | 51.9%  |
| AK033000 | 0           | 0.00 |        |
| AK033041 | 0           | 0.00 |        |
| AK033049 | 0.05004966  | 0.02 | 30.5%  |
| AK033051 | 0           | 0.00 |        |
| AK033058 | 0           | 0.00 |        |
| AK033061 | 0.00402276  | 0.01 | 223.6% |
| AK033064 | 0           | 0.00 |        |
| AK033069 | 0.09454296  | 0.03 | 31.6%  |
| AK033134 | 0.16586386  | 0.13 | 79.0%  |
| AK033147 | 0.22719034  | 0.35 | 153.6% |
| AK033170 | 0           | 0.00 |        |
| AK033180 | 0.012102496 | 0.02 | 133.1% |
| AK033206 | 0.5858726   | 0.12 | 19.8%  |
| AK033210 | 0.03065324  | 0.02 | 72.0%  |
| AK033222 | 0.12836834  | 0.07 | 51.5%  |
| AK033245 | 0.1595914   | 0.02 | 13.1%  |
| AK033378 | 0           | 0.00 |        |
| AK033426 | 0.08641576  | 0.02 | 28.4%  |
| AK033454 | 0.01749366  | 0.00 | 28.5%  |
| AK033508 | 0.00491688  | 0.01 | 140.8% |
| AK033525 | 0.2595312   | 0.19 | 72.3%  |
| AK033611 | 0.0939821   | 0.01 | 14.8%  |
| AK033649 | 12.92054    | 0.41 | 3.1%   |
| AK033706 | 0.001969118 | 0.00 | 223.6% |
| AK033717 | 0           | 0.00 |        |
| AK033743 | 0           | 0.00 |        |
| AK033745 | 0           | 0.00 |        |
| AK033794 | 9.203476    | 0.86 | 9.3%   |
| AK033819 | 0.21948892  | 0.28 | 127.9% |
| AK033827 | 0.05577212  | 0.02 | 33.1%  |
| AK033854 | 1.280864    | 0.12 | 9.5%   |
| AK034016 | 0.4142438   | 0.17 | 40.4%  |
| AK034027 | 0.001636092 | 0.00 | 223.6% |
| AK034052 | 4.344366    | 0.34 | 7.8%   |
| AK034128 | 0.2031632   | 0.08 | 41.4%  |
| AK034141 | 17.04552    | 0.81 | 4.8%   |
| AK034149 | 0.1359736   | 0.04 | 27.5%  |
| AK034159 | 0.013566004 | 0.02 | 140.7% |

|          |             |      |        |
|----------|-------------|------|--------|
| AK034200 | 0.408549    | 0.09 | 21.4%  |
| AK034282 | 0.2994704   | 0.06 | 20.5%  |
| AK034302 | 0.4647644   | 0.15 | 32.7%  |
| AK034341 | 0.09732548  | 0.04 | 43.8%  |
| AK034417 | 0           | 0.00 |        |
| AK034420 | 0.1153962   | 0.01 | 6.8%   |
| AK034421 | 0.00392364  | 0.01 | 223.6% |
| AK034488 | 0           | 0.00 |        |
| AK034502 | 0.421662    | 0.07 | 16.2%  |
| AK034519 | 0.028524442 | 0.02 | 53.2%  |
| AK034539 | 0           | 0.00 |        |
| AK034569 | 3.209858    | 0.39 | 12.2%  |
| AK034698 | 2.060288    | 0.22 | 10.8%  |
| AK034716 | 4.305456    | 0.15 | 3.6%   |
| AK034766 | 0.04458954  | 0.03 | 57.4%  |
| AK034784 | 0.290419    | 0.06 | 22.1%  |
| AK035006 | 0           | 0.00 |        |
| AK035031 | 0.0266944   | 0.05 | 200.8% |
| AK035037 | 20.46208    | 0.97 | 4.8%   |
| AK035085 | 0.01899102  | 0.02 | 109.7% |
| AK035112 | 0.23905106  | 0.18 | 73.6%  |
| AK035124 | 0           | 0.00 |        |
| AK035211 | 0           | 0.00 |        |
| AK035229 | 0.1506848   | 0.03 | 18.1%  |
| AK035302 | 16.80294    | 0.98 | 5.8%   |
| AK035331 | 0.01285564  | 0.01 | 94.5%  |
| AK035353 | 0.0162946   | 0.00 | 22.9%  |
| AK035379 | 0.00227056  | 0.01 | 223.6% |
| AK035387 | 0.11302092  | 0.03 | 29.5%  |
| AK035406 | 0.01127272  | 0.02 | 137.0% |
| AK035444 | 0           | 0.00 |        |
| AK035460 | 0.1917398   | 0.02 | 11.5%  |
| AK035466 | 0.3098126   | 0.06 | 19.3%  |
| AK035515 | 1.5970014   | 0.54 | 33.9%  |
| AK035520 | 0.9073714   | 0.15 | 17.0%  |
| AK035525 | 0.3408584   | 0.18 | 54.0%  |
| AK035573 | 0           | 0.00 |        |
| AK035596 | 0.00252712  | 0.01 | 223.6% |
| AK035625 | 0           | 0.00 |        |
| AK035645 | 27.241      | 1.63 | 6.0%   |
| AK035669 | 0.004772454 | 0.00 | 91.3%  |
| AK035687 | 0.0619089   | 0.03 | 45.3%  |
| AK035706 | 0.0037022   | 0.01 | 223.6% |
| AK035711 | 0.00664466  | 0.01 | 145.2% |
| AK035732 | 0.012048852 | 0.00 | 33.1%  |
| AK035738 | 0           | 0.00 |        |
| AK035742 | 0.2728036   | 0.12 | 42.4%  |



|          |             |      |        |
|----------|-------------|------|--------|
| AK035754 | 0.342639    | 0.07 | 20.3%  |
| AK035761 | 0.05260608  | 0.04 | 75.0%  |
| AK035774 | 0.753724    | 0.17 | 23.1%  |
| AK035785 | 0.209431    | 0.06 | 28.7%  |
| AK035829 | 0.0254179   | 0.03 | 111.0% |
| AK035873 | 0.02627814  | 0.01 | 37.4%  |
| AK035875 | 0.02095932  | 0.02 | 109.3% |
| AK035901 | 0.02553058  | 0.00 | 13.0%  |
| AK035927 | 0.02035844  | 0.01 | 29.5%  |
| AK035977 | 0.006824936 | 0.01 | 95.7%  |
| AK035979 | 0.16797934  | 0.08 | 45.6%  |
| AK035982 | 0.9717234   | 0.06 | 6.3%   |
| AK035994 | 0.03148902  | 0.02 | 59.0%  |
| AK036020 | 0.9348988   | 0.19 | 20.7%  |
| AK036033 | 0.001372226 | 0.00 | 223.6% |
| AK036093 | 0.03921234  | 0.03 | 86.4%  |
| AK036194 | 0.0235446   | 0.02 | 103.9% |
| AK036227 | 1.7431724   | 1.08 | 62.2%  |
| AK036288 | 0.9544      | 0.17 | 17.4%  |
| AK036289 | 14.5451     | 1.23 | 8.4%   |
| AK036307 | 0.25382984  | 0.41 | 162.5% |
| AK036329 | 0.1264936   | 0.03 | 26.1%  |
| AK036369 | 3.084468    | 0.14 | 4.6%   |
| AK036371 | 0.07936698  | 0.03 | 40.8%  |
| AK036396 | 0.02337202  | 0.03 | 149.7% |
| AK036422 | 3.122138    | 0.36 | 11.6%  |
| AK036450 | 0           | 0.00 |        |
| AK036462 | 0.001668586 | 0.00 | 223.6% |
| AK036466 | 0.00984322  | 0.01 | 138.3% |
| AK036470 | 0.01125098  | 0.01 | 58.2%  |
| AK036494 | 0           | 0.00 |        |
| AK036535 | 0.00398964  | 0.01 | 223.6% |
| AK036547 | 0.00949844  | 0.02 | 223.6% |
| AK036551 | 0.008782224 | 0.01 | 58.0%  |
| AK036614 | 1.794404    | 0.18 | 10.0%  |
| AK036632 | 0.04612522  | 0.06 | 135.3% |
| AK036683 | 0           | 0.00 |        |
| AK036693 | 0.5072232   | 0.17 | 33.8%  |
| AK036733 | 0.07135634  | 0.02 | 30.4%  |
| AK036749 | 0.00365832  | 0.01 | 223.6% |
| AK036854 | 0.00748698  | 0.01 | 138.1% |
| AK036897 | 0.005248044 | 0.00 | 94.0%  |
| AK036949 | 0.05454646  | 0.05 | 89.4%  |
| AK036974 | 0.13332228  | 0.07 | 54.3%  |
| AK036982 | 0.017126    | 0.02 | 143.3% |
| AK037026 | 0.02097236  | 0.01 | 30.0%  |
| AK037056 | 0.00973904  | 0.01 | 93.6%  |

|          |             |      |        |
|----------|-------------|------|--------|
| AK037070 | 1.279682    | 0.18 | 14.2%  |
| AK037090 | 0.3758316   | 0.08 | 21.9%  |
| AK037113 | 1.53537944  | 0.94 | 61.5%  |
| AK037155 | 0.2218346   | 0.05 | 24.6%  |
| AK037159 | 0.4728098   | 0.05 | 11.5%  |
| AK037193 | 0.1063029   | 0.06 | 56.5%  |
| AK037260 | 0.228466    | 0.14 | 59.8%  |
| AK037308 | 0.001911562 | 0.00 | 223.6% |
| AK037351 | 0.09526768  | 0.08 | 83.6%  |
| AK037419 | 0           | 0.00 |        |
| AK037512 | 0           | 0.00 |        |
| AK037556 | 0.01813688  | 0.01 | 29.0%  |
| AK037571 | 0           | 0.00 |        |
| AK037623 | 0           | 0.00 |        |
| AK037770 | 0.05366802  | 0.04 | 72.4%  |
| AK037830 | 0.6430266   | 0.13 | 20.7%  |
| AK037841 | 0.14486834  | 0.07 | 46.7%  |
| AK037999 | 0.2122162   | 0.09 | 44.8%  |
| AK038021 | 0.5063684   | 0.16 | 31.3%  |
| AK038079 | 0.4200132   | 0.10 | 23.5%  |
| AK038087 | 0           | 0.00 |        |
| AK038115 | 0.05380609  | 0.06 | 103.7% |
| AK038197 | 0           | 0.00 |        |
| AK038272 | 0.010324438 | 0.01 | 110.9% |
| AK038306 | 0.5639144   | 0.06 | 10.4%  |
| AK038337 | 0.00484124  | 0.01 | 223.6% |
| AK038386 | 0.00458904  | 0.01 | 223.6% |
| AK038391 | 0           | 0.00 |        |
| AK038423 | 0.4570726   | 0.15 | 32.9%  |
| AK038428 | 0           | 0.00 |        |
| AK038525 | 0.5131492   | 0.11 | 21.5%  |
| AK038554 | 0.001821336 | 0.00 | 223.6% |
| AK038589 | 0           | 0.00 |        |
| AK038598 | 0.5995014   | 0.08 | 13.6%  |
| AK038602 | 0.7214886   | 0.30 | 41.7%  |
| AK038603 | 0.4929628   | 0.07 | 13.8%  |
| AK038605 | 0.0386336   | 0.02 | 64.6%  |
| AK038606 | 0           | 0.00 |        |
| AK038610 | 0           | 0.00 |        |
| AK038627 | 0.0879793   | 0.08 | 92.4%  |
| AK038632 | 0.5246862   | 0.13 | 24.9%  |
| AK038649 | 13.74692    | 0.81 | 5.9%   |
| AK038653 | 0.0267091   | 0.02 | 68.2%  |
| AK038665 | 0.02828278  | 0.02 | 73.1%  |
| AK038693 | 0           | 0.00 |        |
| AK038711 | 0           | 0.00 |        |
| AK038726 | 7.652246    | 3.06 | 40.0%  |

|          |             |      |        |
|----------|-------------|------|--------|
| AK038730 | 0           | 0.00 |        |
| AK038731 | 0.0433158   | 0.03 | 65.1%  |
| AK038736 | 0.14632188  | 0.06 | 38.7%  |
| AK038749 | 0.2597806   | 0.06 | 24.8%  |
| AK038767 | 0.03480666  | 0.05 | 136.9% |
| AK038784 | 14.50528    | 0.90 | 6.2%   |
| AK038791 | 0.1916332   | 0.03 | 15.4%  |
| AK038816 | 0.06491628  | 0.04 | 66.4%  |
| AK038818 | 0.09822498  | 0.03 | 28.5%  |
| AK038827 | 0.13132804  | 0.08 | 61.8%  |
| AK038843 | 0.001133632 | 0.00 | 223.6% |
| AK038880 | 0           | 0.00 |        |
| AK038883 | 1.2105382   | 0.34 | 28.2%  |
| AK038885 | 0.2384498   | 0.08 | 31.7%  |
| AK038886 | 0.21586982  | 0.12 | 53.8%  |
| AK038918 | 25.16766    | 1.45 | 5.8%   |
| AK038933 | 0.10008908  | 0.04 | 44.6%  |
| AK038969 | 0.6187906   | 0.40 | 65.4%  |
| AK038985 | 0.08993624  | 0.06 | 62.4%  |
| AK038992 | 0.4331282   | 0.08 | 19.6%  |
| AK038993 | 0.05087676  | 0.01 | 23.1%  |
| AK039009 | 0.02415896  | 0.03 | 112.5% |
| AK039014 | 0.0601912   | 0.06 | 93.5%  |
| AK039017 | 0.08601692  | 0.04 | 44.3%  |
| AK039020 | 0.09310808  | 0.05 | 56.8%  |
| AK039023 | 0.11318182  | 0.05 | 39.9%  |
| AK039030 | 0.3186296   | 0.08 | 24.5%  |
| AK039036 | 0           | 0.00 |        |
| AK039053 | 0.6194474   | 0.17 | 28.0%  |
| AK039056 | 0.6530786   | 0.21 | 32.8%  |
| AK039060 | 0.02208338  | 0.02 | 92.5%  |
| AK039063 | 0.9603432   | 0.20 | 20.6%  |
| AK039065 | 0.09246372  | 0.06 | 68.7%  |
| AK039090 | 0.04239906  | 0.03 | 74.0%  |
| AK039091 | 0.1275136   | 0.06 | 44.7%  |
| AK039104 | 0.1331596   | 0.02 | 13.1%  |
| AK039110 | 0.05321144  | 0.02 | 45.3%  |
| AK039113 | 4.561484    | 0.67 | 14.7%  |
| AK039117 | 11.27808    | 0.43 | 3.8%   |
| AK039118 | 0.0381654   | 0.03 | 79.3%  |
| AK039121 | 0.8745924   | 0.20 | 22.7%  |
| AK039125 | 0.0060443   | 0.01 | 223.6% |
| AK039132 | 14.19386    | 1.47 | 10.4%  |
| AK039140 | 0.25307106  | 0.48 | 188.7% |
| AK039159 | 0.6466358   | 0.15 | 22.9%  |
| AK039238 | 0.01054616  | 0.01 | 93.9%  |
| AK039254 | 24.0485     | 0.65 | 2.7%   |

|          |            |      |        |
|----------|------------|------|--------|
| AK039256 | 0.17925338 | 0.09 | 47.6%  |
| AK039268 | 0.4136692  | 0.17 | 40.5%  |
| AK039269 | 0          | 0.00 |        |
| AK039272 | 0.08471534 | 0.06 | 74.7%  |
| AK039284 | 0.231998   | 0.06 | 27.9%  |
| AK039340 | 0.09296874 | 0.02 | 23.1%  |
| AK039361 | 0.04312286 | 0.04 | 93.0%  |
| AK039362 | 0          | 0.00 |        |
| AK039372 | 0.2360394  | 0.09 | 39.5%  |
| AK039373 | 0.00964362 | 0.01 | 137.7% |
| AK039376 | 0.05436222 | 0.03 | 52.6%  |
| AK039382 | 0.09567324 | 0.04 | 44.8%  |
| AK039403 | 0.943969   | 0.19 | 19.9%  |
| AK039412 | 0          | 0.00 |        |
| AK039417 | 0.7016102  | 0.14 | 19.3%  |
| AK039419 | 0          | 0.00 |        |
| AK039421 | 0          | 0.00 |        |
| AK039436 | 0.07138512 | 0.03 | 39.7%  |
| AK039480 | 0.23631964 | 0.14 | 59.0%  |
| AK039487 | 0          | 0.00 |        |
| AK039494 | 6.59573    | 0.49 | 7.4%   |
| AK039495 | 0.4104702  | 0.12 | 28.3%  |
| AK039498 | 0.0102596  | 0.01 | 91.8%  |
| AK039500 | 0          | 0.00 |        |
| AK039511 | 0.05302672 | 0.05 | 95.3%  |
| AK039536 | 1.844664   | 0.56 | 30.3%  |
| AK039557 | 0.0571003  | 0.06 | 109.4% |
| AK039574 | 1.156608   | 0.40 | 34.8%  |
| AK039577 | 2.00955    | 0.45 | 22.4%  |
| AK039589 | 0          | 0.00 |        |
| AK039595 | 0          | 0.00 |        |
| AK039596 | 0.5235206  | 0.07 | 12.9%  |
| AK039607 | 4.398098   | 0.86 | 19.6%  |
| AK039608 | 0.21040476 | 0.35 | 167.8% |
| AK039624 | 5.228918   | 1.21 | 23.2%  |
| AK039634 | 0          | 0.00 |        |
| AK039635 | 0.9979348  | 0.12 | 12.0%  |
| AK039657 | 0.01937632 | 0.03 | 161.4% |
| AK039679 | 0.6196834  | 0.17 | 27.6%  |
| AK039693 | 0.01612816 | 0.03 | 155.8% |
| AK039712 | 0.13055192 | 0.03 | 25.6%  |
| AK039720 | 0.2532194  | 0.04 | 15.8%  |
| AK039734 | 1.1047302  | 0.11 | 10.0%  |
| AK039749 | 0.00485336 | 0.01 | 139.3% |
| AK039780 | 0          | 0.00 |        |
| AK039796 | 1.0369796  | 0.21 | 20.6%  |
| AK039809 | 0.00977994 | 0.02 | 223.6% |

|          |            |      |        |
|----------|------------|------|--------|
| AK039813 | 0.0169223  | 0.03 | 152.7% |
| AK039819 | 0.1969296  | 0.05 | 23.7%  |
| AK039820 | 0.3542438  | 0.13 | 36.5%  |
| AK039826 | 0.07259584 | 0.02 | 27.3%  |
| AK039827 | 0          | 0.00 |        |
| AK039829 | 0          | 0.00 |        |
| AK039836 | 0          | 0.00 |        |
| AK039837 | 0.00750726 | 0.02 | 223.6% |
| AK039862 | 0.01463594 | 0.01 | 94.6%  |
| AK039882 | 0.4172422  | 0.18 | 42.3%  |
| AK039901 | 6.585184   | 0.92 | 13.9%  |
| AK039918 | 0.07115986 | 0.02 | 30.9%  |
| AK039942 | 0.050018   | 0.01 | 22.8%  |
| AK039954 | 0.15598849 | 0.31 | 200.2% |
| AK039957 | 0          | 0.00 |        |
| AK039958 | 0.090478   | 0.13 | 139.9% |
| AK039960 | 0.17780296 | 0.08 | 47.7%  |
| AK039995 | 0.6442452  | 0.33 | 50.8%  |
| AK040009 | 0.7610782  | 0.17 | 21.8%  |
| AK040027 | 3.58372    | 0.20 | 5.6%   |
| AK040028 | 0          | 0.00 |        |
| AK040035 | 0          | 0.00 |        |
| AK040057 | 0.0248292  | 0.04 | 142.0% |
| AK040058 | 0.04494768 | 0.04 | 84.6%  |
| AK040061 | 0.01750214 | 0.03 | 161.8% |
| AK040062 | 0          | 0.00 |        |
| AK040090 | 0.01164172 | 0.01 | 94.9%  |
| AK040102 | 0          | 0.00 |        |
| AK040104 | 0          | 0.00 |        |
| AK040110 | 0          | 0.00 |        |
| AK040112 | 0.08669112 | 0.02 | 26.3%  |
| AK040143 | 0.00575144 | 0.01 | 223.6% |
| AK040159 | 0.11448064 | 0.12 | 106.8% |
| AK040166 | 0          | 0.00 |        |
| AK040172 | 0.04258008 | 0.02 | 57.3%  |
| AK040173 | 0.11271944 | 0.03 | 27.1%  |
| AK040177 | 0.03039298 | 0.03 | 97.4%  |
| AK040197 | 1.6274502  | 0.65 | 39.6%  |
| AK040202 | 0.11608538 | 0.04 | 35.4%  |
| AK040222 | 0          | 0.00 |        |
| AK040224 | 0.3151796  | 0.05 | 15.5%  |
| AK040231 | 0          | 0.00 |        |
| AK040272 | 0          | 0.00 |        |
| AK040276 | 0.4314056  | 0.12 | 27.0%  |
| AK040278 | 0.02572608 | 0.01 | 56.4%  |
| AK040297 | 0.21136706 | 0.16 | 76.8%  |
| AK040320 | 0.5670516  | 0.06 | 10.2%  |

|          |             |      |        |
|----------|-------------|------|--------|
| AK040357 | 0           | 0.00 |        |
| AK040387 | 0           | 0.00 |        |
| AK040392 | 0.8919444   | 0.20 | 22.7%  |
| AK040398 | 0.06659076  | 0.04 | 66.2%  |
| AK040418 | 0.0846158   | 0.05 | 54.2%  |
| AK040426 | 0           | 0.00 |        |
| AK040430 | 0.3711484   | 0.15 | 40.7%  |
| AK040452 | 0.00252554  | 0.01 | 223.6% |
| AK040485 | 2.81205     | 0.40 | 14.4%  |
| AK040553 | 0           | 0.00 |        |
| AK040557 | 0.17101914  | 0.30 | 174.3% |
| AK040575 | 0.13008542  | 0.03 | 21.5%  |
| AK040602 | 0.7157638   | 0.20 | 27.3%  |
| AK040640 | 0           | 0.00 |        |
| AK040659 | 0.01057738  | 0.02 | 223.6% |
| AK040665 | 0.01329076  | 0.03 | 223.6% |
| AK040671 | 0           | 0.00 |        |
| AK040674 | 0.000108811 | 0.00 | 223.6% |
| AK040684 | 0           | 0.00 |        |
| AK040707 | 0           | 0.00 |        |
| AK040715 | 1.7725502   | 0.50 | 27.9%  |
| AK040733 | 0.2557968   | 0.06 | 24.1%  |
| AK040736 | 0.08835676  | 0.06 | 66.4%  |
| AK040737 | 0.00478674  | 0.01 | 223.6% |
| AK040741 | 1.0696326   | 0.23 | 21.6%  |
| AK040752 | 0.05587744  | 0.01 | 15.6%  |
| AK040794 | 0.03263568  | 0.02 | 57.4%  |
| AK040806 | 0           | 0.00 |        |
| AK040808 | 0.03109472  | 0.01 | 35.3%  |
| AK040818 | 3.3045      | 0.42 | 12.7%  |
| AK040865 | 0.01491994  | 0.02 | 137.0% |
| AK040873 | 0.0073548   | 0.01 | 137.3% |
| AK040904 | 0.01289936  | 0.01 | 97.3%  |
| AK040948 | 1.910218    | 0.38 | 20.1%  |
| AK040960 | 0.04147714  | 0.03 | 68.6%  |
| AK040967 | 0.0484277   | 0.03 | 64.0%  |
| AK040992 | 0           | 0.00 |        |
| AK041042 | 0.3180872   | 0.10 | 31.8%  |
| AK041061 | 5.425716    | 0.46 | 8.6%   |
| AK041075 | 0.9442394   | 0.11 | 11.8%  |
| AK041081 | 2.445556    | 0.38 | 15.4%  |
| AK041085 | 0.11228002  | 0.03 | 24.5%  |
| AK041096 | 0.0916097   | 0.11 | 124.3% |
| AK041109 | 0.08442002  | 0.04 | 50.8%  |
| AK041133 | 0.191198    | 0.05 | 24.7%  |
| AK041142 | 0           | 0.00 |        |
| AK041254 | 0           | 0.00 |        |

|          |            |      |        |
|----------|------------|------|--------|
| AK041267 | 0.00848356 | 0.02 | 223.6% |
| AK041287 | 0.16877398 | 0.17 | 99.5%  |
| AK041310 | 0          | 0.00 |        |
| AK041328 | 0          | 0.00 |        |
| AK041330 | 0.3771998  | 0.03 | 8.7%   |
| AK041339 | 0          | 0.00 |        |
| AK041356 | 0.01864548 | 0.01 | 79.1%  |
| AK041405 | 29.7449    | 1.51 | 5.1%   |
| AK041408 | 0.12007562 | 0.04 | 35.7%  |
| AK041437 | 0          | 0.00 |        |
| AK041441 | 0.00859842 | 0.01 | 110.6% |
| AK041461 | 0.00514076 | 0.01 | 223.6% |
| AK041463 | 0          | 0.00 |        |
| AK041465 | 0.07215636 | 0.03 | 40.8%  |
| AK041531 | 0.03681082 | 0.00 | 10.3%  |
| AK041537 | 0.1799958  | 0.05 | 27.4%  |
| AK041570 | 0.3550454  | 0.10 | 27.5%  |
| AK041587 | 0          | 0.00 |        |
| AK041589 | 0.0055016  | 0.01 | 223.6% |
| AK041600 | 0          | 0.00 |        |
| AK041609 | 0.04188534 | 0.03 | 61.2%  |
| AK041610 | 0.2203088  | 0.05 | 21.7%  |
| AK041614 | 0          | 0.00 |        |
| AK041628 | 0          | 0.00 |        |
| AK041647 | 0          | 0.00 |        |
| AK041706 | 0.00253652 | 0.01 | 223.6% |
| AK041716 | 0          | 0.00 |        |
| AK041746 | 0          | 0.00 |        |
| AK041755 | 0          | 0.00 |        |
| AK041760 | 0.02401314 | 0.02 | 85.2%  |
| AK041762 | 0.01170982 | 0.03 | 223.6% |
| AK041780 | 0          | 0.00 |        |
| AK041781 | 0          | 0.00 |        |
| AK041795 | 0          | 0.00 |        |
| AK041797 | 0.18267758 | 0.12 | 64.7%  |
| AK041893 | 0.10415336 | 0.09 | 87.3%  |
| AK041972 | 0.1821648  | 0.05 | 27.5%  |
| AK041976 | 0          | 0.00 |        |
| AK041998 | 0.0324393  | 0.04 | 116.1% |
| AK042010 | 0.07078672 | 0.07 | 102.5% |
| AK042016 | 0.00896778 | 0.01 | 138.0% |
| AK042028 | 0.22399172 | 0.12 | 54.0%  |
| AK042041 | 0.12416402 | 0.07 | 54.8%  |
| AK042124 | 0.03823578 | 0.05 | 141.6% |
| AK042126 | 0.1647788  | 0.04 | 25.2%  |
| AK042136 | 0          | 0.00 |        |
| AK042188 | 0.04283956 | 0.02 | 39.9%  |

|          |             |      |        |
|----------|-------------|------|--------|
| AK042210 | 0.02345008  | 0.02 | 68.2%  |
| AK042223 | 0.23290521  | 0.39 | 168.4% |
| AK042229 | 0           | 0.00 |        |
| AK042235 | 0.3605112   | 0.06 | 18.0%  |
| AK042249 | 0           | 0.00 |        |
| AK042292 | 0           | 0.00 |        |
| AK042300 | 0.6077492   | 0.11 | 18.2%  |
| AK042313 | 0           | 0.00 |        |
| AK042336 | 0.00641216  | 0.01 | 223.6% |
| AK042353 | 0           | 0.00 |        |
| AK042354 | 0.01198784  | 0.01 | 59.2%  |
| AK042436 | 0.8524458   | 0.17 | 20.3%  |
| AK042445 | 0.2006288   | 0.06 | 27.9%  |
| AK042514 | 0.0182966   | 0.03 | 137.3% |
| AK042551 | 0           | 0.00 |        |
| AK042554 | 0.06791046  | 0.04 | 55.2%  |
| AK042602 | 0           | 0.00 |        |
| AK042610 | 0.0538949   | 0.05 | 89.1%  |
| AK042619 | 0.3038354   | 0.12 | 40.4%  |
| AK042647 | 0.005921636 | 0.01 | 91.8%  |
| AK042665 | 0           | 0.00 |        |
| AK042686 | 0           | 0.00 |        |
| AK042707 | 12.526      | 0.60 | 4.8%   |
| AK042714 | 0.00457112  | 0.01 | 223.6% |
| AK042718 | 0.011099564 | 0.01 | 78.5%  |
| AK042724 | 0.0256747   | 0.03 | 101.2% |
| AK042726 | 0.00531078  | 0.01 | 223.6% |
| AK042746 | 0.02442698  | 0.03 | 105.6% |
| AK042765 | 0.10121462  | 0.02 | 16.6%  |
| AK042789 | 0.02133408  | 0.02 | 103.7% |
| AK042791 | 0.04741764  | 0.01 | 28.3%  |
| AK042797 | 0.3211148   | 0.13 | 40.8%  |
| AK042807 | 0.07867894  | 0.02 | 23.0%  |
| AK042838 | 0.5177334   | 0.07 | 13.5%  |
| AK042843 | 0.01650988  | 0.02 | 138.3% |
| AK042845 | 0.05031182  | 0.02 | 38.8%  |
| AK042904 | 0.2498126   | 0.09 | 34.5%  |
| AK042907 | 0.4728726   | 0.19 | 40.9%  |
| AK042927 | 0.10463718  | 0.03 | 33.3%  |
| AK042933 | 0           | 0.00 |        |
| AK042944 | 0.0052107   | 0.01 | 223.6% |
| AK042948 | 0.03240792  | 0.01 | 17.3%  |
| AK042996 | 14.76148    | 2.33 | 15.8%  |
| AK042998 | 0.8774318   | 0.07 | 7.5%   |
| AK043004 | 0.0943102   | 0.04 | 42.2%  |
| AK043032 | 0.05247844  | 0.02 | 39.9%  |
| AK043043 | 0.1790276   | 0.11 | 62.8%  |



|          |             |      |        |
|----------|-------------|------|--------|
| AK043046 | 1.721282    | 0.14 | 7.9%   |
| AK043075 | 0           | 0.00 |        |
| AK043085 | 0           | 0.00 |        |
| AK043087 | 0.07272838  | 0.05 | 66.5%  |
| AK043092 | 0.1903323   | 0.09 | 46.8%  |
| AK043101 | 0.880028    | 0.18 | 20.1%  |
| AK043120 | 0.950547    | 0.74 | 77.4%  |
| AK043130 | 2.002216    | 0.23 | 11.4%  |
| AK043153 | 5.912776    | 0.59 | 10.0%  |
| AK043155 | 0.10130134  | 0.09 | 92.4%  |
| AK043163 | 0           | 0.00 |        |
| AK043166 | 22.79036    | 1.62 | 7.1%   |
| AK043174 | 1.0585794   | 0.19 | 18.0%  |
| AK043182 | 1.650964    | 0.16 | 9.7%   |
| AK043219 | 0           | 0.00 |        |
| AK043242 | 4.781864    | 0.57 | 12.0%  |
| AK043252 | 1.59851     | 0.45 | 27.9%  |
| AK043267 | 0.03075494  | 0.01 | 41.3%  |
| AK043278 | 0.1368412   | 0.03 | 19.1%  |
| AK043285 | 0.9139378   | 0.13 | 14.7%  |
| AK043286 | 0.07160058  | 0.12 | 171.7% |
| AK043292 | 0.1260062   | 0.03 | 27.3%  |
| AK043303 | 0.00505252  | 0.01 | 223.6% |
| AK043305 | 0.3109756   | 0.09 | 27.5%  |
| AK043311 | 0           | 0.00 |        |
| AK043331 | 0           | 0.00 |        |
| AK043332 | 0.02176006  | 0.01 | 24.1%  |
| AK043359 | 16.24124    | 0.65 | 4.0%   |
| AK043361 | 0.5932062   | 0.05 | 8.3%   |
| AK043365 | 0.0054252   | 0.01 | 223.6% |
| AK043393 | 0.011791155 | 0.01 | 92.1%  |
| AK043439 | 0.3562012   | 0.15 | 41.2%  |
| AK043460 | 0           | 0.00 |        |
| AK043502 | 0.5810986   | 0.18 | 31.4%  |
| AK043505 | 0           | 0.00 |        |
| AK043509 | 0.5082668   | 0.16 | 32.3%  |
| AK043516 | 3.51641     | 0.54 | 15.4%  |
| AK043531 | 0.4973512   | 0.12 | 23.3%  |
| AK043564 | 0           | 0.00 |        |
| AK043581 | 0.01294062  | 0.02 | 149.3% |
| AK043607 | 0.24473     | 0.10 | 40.4%  |
| AK043612 | 0.16674954  | 0.07 | 43.8%  |
| AK043613 | 0           | 0.00 |        |
| AK043659 | 0.00239174  | 0.01 | 223.6% |
| AK043662 | 0           | 0.00 |        |
| AK043679 | 0.00221976  | 0.00 | 223.6% |
| AK043690 | 0.01607918  | 0.02 | 94.6%  |

|          |            |      |        |
|----------|------------|------|--------|
| AK043693 | 0.19648328 | 0.12 | 60.8%  |
| AK043723 | 0.13971804 | 0.05 | 38.7%  |
| AK043747 | 3.329298   | 0.81 | 24.2%  |
| AK043766 | 0.27140714 | 0.19 | 71.5%  |
| AK043780 | 0.3013588  | 0.09 | 30.9%  |
| AK043789 | 0.4858464  | 0.18 | 37.2%  |
| AK043790 | 1.528702   | 0.34 | 22.1%  |
| AK043804 | 0.1102102  | 0.07 | 60.1%  |
| AK043814 | 1.1496096  | 0.16 | 14.1%  |
| AK043844 | 0.07277328 | 0.04 | 57.1%  |
| AK043846 | 0.7642954  | 0.23 | 30.3%  |
| AK043847 | 17.77534   | 2.23 | 12.5%  |
| AK043851 | 2.249838   | 0.19 | 8.4%   |
| AK043869 | 0          | 0.00 |        |
| AK043886 | 0          | 0.00 |        |
| AK043904 | 0.08041498 | 0.02 | 26.7%  |
| AK043919 | 0.473032   | 0.08 | 16.0%  |
| AK043922 | 0.00793296 | 0.01 | 138.1% |
| AK043935 | 0.4308062  | 0.12 | 27.5%  |
| AK043947 | 0.00822132 | 0.01 | 141.3% |
| AK043958 | 0.3705726  | 0.18 | 49.9%  |
| AK043964 | 0          | 0.00 |        |
| AK043973 | 0.16749116 | 0.10 | 60.1%  |
| AK043982 | 0.06229836 | 0.06 | 94.0%  |
| AK043991 | 0          | 0.00 |        |
| AK043994 | 0.13674682 | 0.05 | 33.8%  |
| AK043996 | 0.0374852  | 0.05 | 141.5% |
| AK044020 | 0.3190412  | 0.08 | 23.9%  |
| AK044033 | 0.20080996 | 0.09 | 43.3%  |
| AK044036 | 2.437562   | 0.24 | 9.8%   |
| AK044041 | 0.00809346 | 0.01 | 137.0% |
| AK044089 | 0.11343544 | 0.09 | 80.0%  |
| AK044106 | 0.13043812 | 0.10 | 76.0%  |
| AK044164 | 0.09772854 | 0.05 | 52.1%  |
| AK044242 | 0.08683904 | 0.05 | 52.9%  |
| AK044313 | 0.2239252  | 0.05 | 20.2%  |
| AK044329 | 2.043006   | 0.14 | 7.1%   |
| AK044354 | 0.02845813 | 0.04 | 151.7% |
| AK044363 | 0.02187646 | 0.01 | 26.2%  |
| AK044374 | 0.13475016 | 0.04 | 30.8%  |
| AK044376 | 2.777734   | 0.31 | 11.0%  |
| AK044380 | 0.554951   | 0.14 | 25.4%  |
| AK044414 | 0.3104726  | 0.07 | 23.7%  |
| AK044422 | 15.2321    | 2.18 | 14.3%  |
| AK044425 | 0.7844652  | 0.23 | 28.8%  |
| AK044426 | 0.00273696 | 0.01 | 223.6% |
| AK044430 | 0.7582502  | 0.13 | 16.6%  |

|          |            |      |        |
|----------|------------|------|--------|
| AK044432 | 0.75603524 | 0.65 | 86.5%  |
| AK044435 | 0.2135224  | 0.07 | 34.1%  |
| AK044447 | 0.09624434 | 0.04 | 41.4%  |
| AK044449 | 0.00568768 | 0.01 | 140.4% |
| AK044466 | 0.11001758 | 0.01 | 11.9%  |
| AK044480 | 0.2953796  | 0.08 | 26.8%  |
| AK044491 | 0.00166527 | 0.00 | 223.6% |
| AK044503 | 0.20017366 | 0.08 | 39.4%  |
| AK044505 | 0.0901335  | 0.05 | 50.1%  |
| AK044526 | 0.2765384  | 0.06 | 20.7%  |
| AK044563 | 3.49356    | 0.49 | 13.9%  |
| AK044622 | 0.4976702  | 0.09 | 19.1%  |
| AK044623 | 0.1313718  | 0.02 | 18.5%  |
| AK044644 | 0.5150202  | 0.10 | 18.6%  |
| AK044653 | 0.05280562 | 0.02 | 43.4%  |
| AK044673 | 0          | 0.00 |        |
| AK044689 | 2.27851    | 0.36 | 15.6%  |
| AK044780 | 0          | 0.00 |        |
| AK044786 | 0.009093   | 0.01 | 147.9% |
| AK044789 | 0.286433   | 0.02 | 7.7%   |
| AK044848 | 0.09311862 | 0.03 | 35.9%  |
| AK044901 | 2.682924   | 0.30 | 11.3%  |
| AK045038 | 7.889482   | 0.37 | 4.7%   |
| AK045070 | 0.11717096 | 0.02 | 15.8%  |
| AK045112 | 0.4344288  | 0.09 | 21.7%  |
| AK045137 | 0.04467702 | 0.05 | 105.5% |
| AK045142 | 0.09144854 | 0.04 | 40.6%  |
| AK045225 | 1.1041624  | 0.28 | 25.8%  |
| AK045242 | 0          | 0.00 |        |
| AK045244 | 0.8079946  | 0.13 | 16.6%  |
| AK045290 | 1.227278   | 0.14 | 11.3%  |
| AK045371 | 11.77526   | 0.41 | 3.5%   |
| AK045385 | 0.171895   | 0.04 | 25.7%  |
| AK045413 | 1.922342   | 0.47 | 24.5%  |
| AK045483 | 0.00355372 | 0.01 | 223.6% |
| AK045502 | 0.5270282  | 0.08 | 15.5%  |
| AK045519 | 0.0888823  | 0.03 | 39.2%  |
| AK045535 | 6.00551    | 0.59 | 9.9%   |
| AK045614 | 0.09136072 | 0.03 | 31.5%  |
| AK045624 | 0.0608596  | 0.03 | 41.8%  |
| AK045637 | 1.730114   | 0.42 | 24.5%  |
| AK045643 | 1.372712   | 0.22 | 16.2%  |
| AK045649 | 9.223206   | 0.95 | 10.3%  |
| AK045681 | 0.2204892  | 0.06 | 29.4%  |
| AK045688 | 0.4982674  | 0.11 | 22.6%  |
| AK045700 | 0.01673278 | 0.03 | 155.8% |
| AK045728 | 0.01440236 | 0.02 | 110.0% |

|          |            |      |        |
|----------|------------|------|--------|
| AK045744 | 0.6474494  | 0.20 | 30.5%  |
| AK045755 | 0.0370608  | 0.03 | 91.1%  |
| AK045786 | 0.0251726  | 0.06 | 223.6% |
| AK045807 | 0.173881   | 0.05 | 26.4%  |
| AK045814 | 0.7213446  | 0.09 | 12.3%  |
| AK045818 | 0.940274   | 0.15 | 16.3%  |
| AK045825 | 0.07637984 | 0.06 | 73.8%  |
| AK045837 | 0.5123414  | 0.04 | 7.9%   |
| AK045842 | 0.17485924 | 0.09 | 51.6%  |
| AK045885 | 2.433368   | 0.67 | 27.7%  |
| AK045913 | 0.1685628  | 0.04 | 22.7%  |
| AK045932 | 0.2339038  | 0.04 | 19.0%  |
| AK045951 | 0          | 0.00 |        |
| AK045952 | 1.1666486  | 0.44 | 37.5%  |
| AK045970 | 0.623117   | 0.13 | 20.3%  |
| AK046006 | 0.11967484 | 0.03 | 22.1%  |
| AK046023 | 3.796678   | 0.22 | 5.7%   |
| AK046026 | 0.1105248  | 0.03 | 24.6%  |
| AK046042 | 0.833097   | 0.29 | 35.2%  |
| AK046044 | 1.381976   | 0.15 | 10.7%  |
| AK046045 | 0.07193366 | 0.04 | 56.9%  |
| AK046134 | 1.892962   | 0.26 | 14.0%  |
| AK046150 | 0.3926184  | 0.09 | 22.4%  |
| AK046160 | 0.2507392  | 0.10 | 39.1%  |
| AK046168 | 0          | 0.00 |        |
| AK046172 | 0.16042046 | 0.14 | 86.0%  |
| AK046182 | 0          | 0.00 |        |
| AK046224 | 1.771602   | 0.40 | 22.5%  |
| AK046225 | 0.9157168  | 0.22 | 23.7%  |
| AK046240 | 1.0015312  | 0.51 | 50.4%  |
| AK046242 | 0          | 0.00 |        |
| AK046278 | 7.56932    | 0.30 | 4.0%   |
| AK046300 | 0.04754378 | 0.02 | 39.6%  |
| AK046304 | 6.902172   | 0.32 | 4.6%   |
| AK046316 | 0.90504    | 0.08 | 9.2%   |
| AK046349 | 0.0133405  | 0.03 | 223.6% |
| AK046351 | 0.919828   | 0.08 | 8.2%   |
| AK046385 | 0.08823232 | 0.04 | 45.6%  |
| AK046388 | 0          | 0.00 |        |
| AK046417 | 5.921714   | 0.40 | 6.7%   |
| AK046418 | 19.904     | 3.25 | 16.3%  |
| AK046440 | 0.0496196  | 0.07 | 141.1% |
| AK046443 | 0.6239882  | 0.13 | 20.1%  |
| AK046721 | 0.08866954 | 0.01 | 15.4%  |
| AK046727 | 0.0362584  | 0.02 | 52.4%  |
| AK046737 | 0.0723307  | 0.03 | 39.3%  |
| AK046740 | 22.80574   | 0.92 | 4.0%   |

|          |             |      |        |
|----------|-------------|------|--------|
| AK046742 | 0.1889356   | 0.27 | 142.4% |
| AK046786 | 0.2257294   | 0.08 | 37.1%  |
| AK046846 | 3.06984     | 0.29 | 9.3%   |
| AK046920 | 3.789188    | 0.28 | 7.4%   |
| AK046940 | 2.354354    | 0.55 | 23.5%  |
| AK046967 | 0.3732284   | 0.08 | 20.8%  |
| AK046981 | 0.0669792   | 0.05 | 67.4%  |
| AK047022 | 7.6404      | 0.15 | 1.9%   |
| AK047030 | 1.235736    | 0.12 | 9.6%   |
| AK047141 | 0.00298464  | 0.01 | 223.6% |
| AK047145 | 0           | 0.00 |        |
| AK047163 | 0           | 0.00 |        |
| AK047175 | 0.0498559   | 0.02 | 47.7%  |
| AK047177 | 0.000949308 | 0.00 | 223.6% |
| AK047199 | 0.06022294  | 0.02 | 37.0%  |
| AK047239 | 0           | 0.00 |        |
| AK047243 | 0.030129244 | 0.03 | 99.8%  |
| AK047272 | 1.360568    | 0.30 | 21.8%  |
| AK047309 | 0           | 0.00 |        |
| AK047323 | 0.11595894  | 0.06 | 52.1%  |
| AK047366 | 0.1945858   | 0.09 | 48.7%  |
| AK047370 | 0.346916    | 0.11 | 30.9%  |
| AK047441 | 0.18104474  | 0.11 | 58.4%  |
| AK047520 | 0.4354862   | 0.11 | 25.0%  |
| AK047534 | 0.02296102  | 0.03 | 124.7% |
| AK047558 | 1.459252    | 0.03 | 2.2%   |
| AK047607 | 0.09468286  | 0.03 | 30.9%  |
| AK047660 | 0.14342372  | 0.09 | 62.0%  |
| AK047676 | 1.116324    | 0.10 | 8.8%   |
| AK047727 | 0.12752838  | 0.11 | 90.0%  |
| AK047741 | 0.6077558   | 0.17 | 27.4%  |
| AK047765 | 0.02063808  | 0.02 | 105.7% |
| AK047804 | 0.00897942  | 0.02 | 223.6% |
| AK047857 | 0.0734481   | 0.02 | 22.5%  |
| AK047916 | 0.01796222  | 0.01 | 30.1%  |
| AK047931 | 2.008966    | 0.35 | 17.6%  |
| AK047938 | 0.010865137 | 0.01 | 105.2% |
| AK047944 | 0.7118638   | 0.16 | 22.6%  |
| AK047946 | 2.565998    | 0.49 | 19.2%  |
| AK047978 | 0.3070824   | 0.09 | 29.8%  |
| AK047984 | 0.2135548   | 0.04 | 20.6%  |
| AK047988 | 0.2444284   | 0.04 | 18.2%  |
| AK048013 | 1.80296     | 0.36 | 20.1%  |
| AK048019 | 0.00676086  | 0.02 | 223.6% |
| AK048031 | 0.20942078  | 0.10 | 47.9%  |
| AK048032 | 0           | 0.00 |        |
| AK048037 | 97.72796    | 1.78 | 1.8%   |

|          |             |      |        |
|----------|-------------|------|--------|
| AK048048 | 0.001918515 | 0.00 | 131.3% |
| AK048050 | 0.00454664  | 0.01 | 223.6% |
| AK048080 | 3.2111      | 0.32 | 9.9%   |
| AK048089 | 0.07685546  | 0.02 | 24.9%  |
| AK048257 | 0.13495438  | 0.13 | 96.1%  |
| AK048274 | 0           | 0.00 |        |
| AK048275 | 0.01706312  | 0.01 | 56.2%  |
| AK048280 | 3.201412    | 0.18 | 5.6%   |
| AK048292 | 0.3794732   | 0.13 | 35.3%  |
| AK048368 | 0.02491914  | 0.01 | 51.5%  |
| AK048429 | 0.2163424   | 0.12 | 53.5%  |
| AK048446 | 2.2300308   | 1.12 | 50.1%  |
| AK048484 | 0.19621524  | 0.16 | 82.8%  |
| AK048523 | 0.05292158  | 0.02 | 46.3%  |
| AK048571 | 1.1136418   | 0.61 | 54.7%  |
| AK048592 | 0.05701642  | 0.06 | 108.5% |
| AK048630 | 0.13487374  | 0.06 | 44.4%  |
| AK048664 | 0.09727532  | 0.12 | 128.5% |
| AK048672 | 0.02940858  | 0.01 | 39.8%  |
| AK048681 | 7.68409     | 1.50 | 19.6%  |
| AK048710 | 0.773424    | 0.14 | 18.0%  |
| AK048739 | 0.07126792  | 0.02 | 26.2%  |
| AK048775 | 0.016483242 | 0.01 | 69.6%  |
| AK048798 | 0.07447566  | 0.05 | 73.8%  |
| AK048814 | 0.00349882  | 0.01 | 223.6% |
| AK048828 | 0.4583648   | 0.16 | 34.0%  |
| AK048831 | 0.04723918  | 0.01 | 18.0%  |
| AK048846 | 1.1935214   | 0.19 | 16.0%  |
| AK048878 | 0.04954188  | 0.02 | 40.8%  |
| AK048886 | 0.6940176   | 0.13 | 18.5%  |
| AK048941 | 0.2101618   | 0.08 | 35.9%  |
| AK048946 | 0           | 0.00 |        |
| AK048993 | 0.452117    | 0.05 | 12.0%  |
| AK048995 | 0.09671006  | 0.03 | 32.0%  |
| AK049017 | 0.12930738  | 0.04 | 30.9%  |
| AK049041 | 0.350075308 | 0.71 | 201.5% |
| AK049068 | 0.4226762   | 0.11 | 26.0%  |
| AK049102 | 0.05595932  | 0.04 | 68.6%  |
| AK049111 | 1.565332    | 0.32 | 20.2%  |
| AK049123 | 0.11860756  | 0.07 | 58.3%  |
| AK049146 | 0.006360122 | 0.01 | 158.4% |
| AK049160 | 0.08115952  | 0.04 | 45.2%  |
| AK049168 | 0.00342902  | 0.01 | 223.6% |
| AK049221 | 0           | 0.00 |        |
| AK049248 | 0.03284232  | 0.04 | 121.2% |
| AK049264 | 0.12937922  | 0.06 | 44.0%  |
| AK049282 | 0           | 0.00 |        |

|          |            |      |        |
|----------|------------|------|--------|
| AK049289 | 0.14417632 | 0.03 | 23.2%  |
| AK049295 | 0.01740218 | 0.02 | 99.9%  |
| AK049416 | 0.13253202 | 0.04 | 32.4%  |
| AK049508 | 0.11901442 | 0.06 | 50.4%  |
| AK049515 | 1.7973136  | 1.40 | 78.2%  |
| AK049522 | 0          | 0.00 |        |
| AK049536 | 0.1518464  | 0.10 | 64.0%  |
| AK049578 | 0.09392686 | 0.05 | 52.8%  |
| AK049621 | 0.20544504 | 0.12 | 59.6%  |
| AK049630 | 0.678946   | 0.16 | 24.0%  |
| AK049663 | 0.1065725  | 0.06 | 52.0%  |
| AK049668 | 2.741722   | 0.27 | 10.0%  |
| AK049769 | 1.6715978  | 0.54 | 32.3%  |
| AK049838 | 0.07965636 | 0.04 | 46.4%  |
| AK049847 | 0.05767324 | 0.01 | 12.8%  |
| AK049852 | 0.802517   | 0.12 | 14.5%  |
| AK049860 | 0.2220554  | 0.08 | 35.6%  |
| AK049871 | 0.0141937  | 0.02 | 141.6% |
| AK049951 | 9.800738   | 1.07 | 10.9%  |
| AK049972 | 8.06802    | 0.38 | 4.7%   |
| AK049985 | 0.0278545  | 0.02 | 64.3%  |
| AK050069 | 0.0914124  | 0.09 | 95.6%  |
| AK050085 | 0.01072072 | 0.01 | 138.1% |
| AK050091 | 0.06461226 | 0.02 | 35.9%  |
| AK050117 | 0.12139052 | 0.20 | 166.9% |
| AK050144 | 0.015747   | 0.04 | 223.6% |
| AK050164 | 0.04733248 | 0.02 | 39.7%  |
| AK050169 | 6.985346   | 0.72 | 10.4%  |
| AK050197 | 0          | 0.00 |        |
| AK050201 | 0.1544556  | 0.04 | 23.0%  |
| AK050217 | 0          | 0.00 |        |
| AK050232 | 0.07616988 | 0.03 | 38.1%  |
| AK050253 | 0.5186694  | 0.14 | 26.2%  |
| AK050258 | 0          | 0.00 |        |
| AK050283 | 0.00516748 | 0.01 | 223.6% |
| AK050290 | 0.8430714  | 0.59 | 69.5%  |
| AK050336 | 0          | 0.00 |        |
| AK050349 | 0          | 0.00 |        |
| AK050351 | 0          | 0.00 |        |
| AK050360 | 0          | 0.00 |        |
| AK050464 | 0.01643008 | 0.02 | 108.2% |
| AK050510 | 0          | 0.00 |        |
| AK050516 | 0          | 0.00 |        |
| AK050558 | 0.05297098 | 0.02 | 42.7%  |
| AK050586 | 1.529378   | 0.23 | 15.1%  |
| AK050592 | 0          | 0.00 |        |
| AK050700 | 0          | 0.00 |        |

|          |             |       |        |
|----------|-------------|-------|--------|
| AK050707 | 0.7290408   | 0.12  | 16.1%  |
| AK050735 | 0.9191182   | 0.12  | 12.6%  |
| AK050745 | 0.3459774   | 0.10  | 29.1%  |
| AK050795 | 5.487092    | 0.37  | 6.7%   |
| AK050809 | 0.6519176   | 0.16  | 24.6%  |
| AK050838 | 0.02485402  | 0.01  | 27.8%  |
| AK050844 | 0           | 0.00  |        |
| AK050859 | 1.28937     | 0.17  | 13.2%  |
| AK050866 | 0.01359926  | 0.01  | 99.7%  |
| AK050909 | 0           | 0.00  |        |
| AK050940 | 0.505056    | 0.11  | 22.5%  |
| AK051008 | 0           | 0.00  |        |
| AK051019 | 0.07180102  | 0.03  | 48.6%  |
| AK051045 | 1.870368    | 0.26  | 13.8%  |
| AK051055 | 0.00564374  | 0.01  | 223.6% |
| AK051057 | 0.00553066  | 0.01  | 223.6% |
| AK051160 | 24.22806    | 1.63  | 6.7%   |
| AK051166 | 0.018413124 | 0.01  | 38.7%  |
| AK051202 | 0.0415765   | 0.02  | 41.7%  |
| AK051321 | 0           | 0.00  |        |
| AK051368 | 0.10778918  | 0.05  | 48.1%  |
| AK051417 | 3.102044    | 0.15  | 4.7%   |
| AK051424 | 0.03999988  | 0.03  | 72.6%  |
| AK051451 | 0           | 0.00  |        |
| AK051464 | 0.000670495 | 0.00  | 194.8% |
| AK051482 | 0.00648868  | 0.01  | 141.0% |
| AK051495 | 0.016394184 | 0.01  | 84.3%  |
| AK051573 | 201.3888    | 21.37 | 10.6%  |
| AK051656 | 0.5165704   | 0.08  | 14.7%  |
| AK051771 | 0.006835658 | 0.01  | 102.3% |
| AK051804 | 0.1989616   | 0.04  | 22.4%  |
| AK051847 | 1.998712    | 0.19  | 9.6%   |
| AK051864 | 0.00851092  | 0.01  | 91.9%  |
| AK051887 | 0.2272002   | 0.05  | 21.1%  |
| AK051928 | 0.4871314   | 0.17  | 35.5%  |
| AK052076 | 0.05338576  | 0.04  | 82.8%  |
| AK052157 | 0.21993468  | 0.25  | 112.8% |
| AK052161 | 0.21275972  | 0.09  | 42.8%  |
| AK052226 | 0.04516878  | 0.05  | 108.5% |
| AK052293 | 1.2169024   | 0.39  | 32.4%  |
| AK052319 | 4.950596    | 0.76  | 15.3%  |
| AK052414 | 3.227892    | 0.63  | 19.5%  |
| AK052495 | 0.6093578   | 0.63  | 103.3% |
| AK052569 | 1.1496712   | 0.24  | 20.6%  |
| AK052572 | 0           | 0.00  |        |
| AK052590 | 0.03020918  | 0.02  | 57.2%  |
| AK052594 | 0.01571528  | 0.01  | 68.7%  |



|          |             |      |        |
|----------|-------------|------|--------|
| AK052627 | 0           | 0.00 |        |
| AK052711 | 0           | 0.00 |        |
| AK052712 | 0.011267394 | 0.01 | 91.5%  |
| AK052773 | 0.4248496   | 0.08 | 19.7%  |
| AK052788 | 0           | 0.00 |        |
| AK052792 | 0.1378928   | 0.16 | 117.6% |
| AK052812 | 0.431003    | 0.13 | 29.8%  |
| AK052874 | 0.14303016  | 0.11 | 73.9%  |
| AK052878 | 0.0361895   | 0.03 | 93.8%  |
| AK052880 | 0.01382496  | 0.02 | 169.6% |
| AK052881 | 0.06681586  | 0.01 | 13.0%  |
| AK052888 | 0.00299138  | 0.01 | 223.6% |
| AK052909 | 0.4441426   | 0.16 | 37.0%  |
| AK053027 | 0.7661718   | 0.12 | 15.8%  |
| AK053040 | 0.0033929   | 0.01 | 223.6% |
| AK053084 | 0.11274618  | 0.05 | 40.3%  |
| AK053109 | 0.02322056  | 0.02 | 83.2%  |
| AK053124 | 0.001834742 | 0.00 | 223.6% |
| AK053136 | 0.01139662  | 0.02 | 139.0% |
| AK053148 | 0.02480294  | 0.02 | 99.6%  |
| AK053157 | 0           | 0.00 |        |
| AK053193 | 0.0414511   | 0.02 | 59.7%  |
| AK053224 | 0.1819802   | 0.05 | 25.5%  |
| AK053225 | 0           | 0.00 |        |
| AK053246 | 0.2115045   | 0.15 | 71.9%  |
| AK053270 | 0.3582356   | 0.10 | 27.0%  |
| AK053274 | 0.4931608   | 0.19 | 39.1%  |
| AK053295 | 0.12893324  | 0.05 | 36.6%  |
| AK053296 | 0.0030938   | 0.01 | 223.6% |
| AK053303 | 0.011274088 | 0.01 | 68.6%  |
| AK053334 | 0.0048573   | 0.01 | 138.1% |
| AK053386 | 0.12625262  | 0.08 | 62.1%  |
| AK053416 | 0           | 0.00 |        |
| AK053418 | 0.07796564  | 0.04 | 54.6%  |
| AK053469 | 1.603702    | 0.31 | 19.4%  |
| AK053505 | 0.1540602   | 0.04 | 26.8%  |
| AK053540 | 21.99404    | 6.97 | 31.7%  |
| AK053590 | 5.060982    | 0.49 | 9.6%   |
| AK053602 | 0.03236788  | 0.03 | 103.5% |
| AK053689 | 3.057464    | 0.93 | 30.4%  |
| AK053703 | 1.276944    | 0.10 | 8.1%   |
| AK053708 | 0.02358634  | 0.01 | 41.6%  |
| AK053722 | 0.011052969 | 0.01 | 91.3%  |
| AK053772 | 0.17951202  | 0.07 | 37.4%  |
| AK053779 | 1.792278    | 0.32 | 18.1%  |
| AK053790 | 0.05653494  | 0.05 | 89.2%  |
| AK053957 | 0.00523206  | 0.01 | 137.3% |

|          |             |      |        |
|----------|-------------|------|--------|
| AK053982 | 2.685572    | 0.60 | 22.2%  |
| AK053993 | 0.1677176   | 0.02 | 13.9%  |
| AK053994 | 0           | 0.00 |        |
| AK054042 | 0.3052376   | 0.10 | 31.8%  |
| AK054074 | 0.009885196 | 0.01 | 75.0%  |
| AK054076 | 0.3339804   | 0.10 | 31.1%  |
| AK054106 | 0.0406414   | 0.04 | 88.3%  |
| AK054128 | 0.004963438 | 0.01 | 161.4% |
| AK054201 | 0.01259318  | 0.02 | 138.5% |
| AK054221 | 0           | 0.00 |        |
| AK054265 | 0           | 0.00 |        |
| AK054333 | 0           | 0.00 |        |
| AK054344 | 0           | 0.00 |        |
| AK054420 | 0.04932692  | 0.01 | 25.0%  |
| AK054431 | 0           | 0.00 |        |
| AK054442 | 0           | 0.00 |        |
| AK054493 | 0.02704456  | 0.02 | 69.1%  |
| AK054504 | 0           | 0.00 |        |
| AK054515 | 0.02048802  | 0.02 | 100.1% |
| AK054526 | 0.00729804  | 0.02 | 223.6% |
| AK057615 | 7.685312    | 0.80 | 10.4%  |
| AK075572 | 0.5264286   | 0.15 | 27.8%  |
| AK075633 | 0           | 0.00 |        |
| AK075658 | 0           | 0.00 |        |
| AK075664 | 4.015184    | 0.20 | 5.1%   |
| AK075667 | 0.03367844  | 0.03 | 76.4%  |
| AK075695 | 0.18972796  | 0.09 | 48.4%  |
| AK075724 | 1.1805188   | 0.26 | 22.2%  |
| AK076052 | 0.17449488  | 0.08 | 43.3%  |
| AK076253 | 0           | 0.00 |        |
| AK076313 | 0.11754856  | 0.04 | 34.8%  |
| AK076318 | 0.006199462 | 0.01 | 152.8% |
| AK076358 | 0.07998992  | 0.05 | 57.6%  |
| AK076372 | 0.4626148   | 0.11 | 24.0%  |
| AK076389 | 0.885436    | 0.18 | 20.3%  |
| AK076396 | 0.13385452  | 0.03 | 23.6%  |
| AK076440 | 0.00913498  | 0.01 | 94.3%  |
| AK076555 | 0.10652706  | 0.03 | 26.7%  |
| AK076583 | 2.901664    | 0.38 | 13.1%  |
| AK076597 | 0.0045091   | 0.01 | 223.6% |
| AK076606 | 2.441276    | 0.82 | 33.6%  |
| AK076622 | 0           | 0.00 |        |
| AK076652 | 3.78122     | 0.51 | 13.6%  |
| AK076655 | 0           | 0.00 |        |
| AK076657 | 0           | 0.00 |        |
| AK076658 | 0           | 0.00 |        |
| AK076660 | 0           | 0.00 |        |

|          |            |      |        |
|----------|------------|------|--------|
| AK076661 | 0.5324336  | 0.13 | 23.8%  |
| AK076664 | 0          | 0.00 |        |
| AK076665 | 0          | 0.00 |        |
| AK076668 | 0.6049942  | 0.39 | 64.8%  |
| AK076672 | 0          | 0.00 |        |
| AK076673 | 0          | 0.00 |        |
| AK076674 | 0          | 0.00 |        |
| AK076676 | 0          | 0.00 |        |
| AK076677 | 0.0165686  | 0.00 | 26.4%  |
| AK076683 | 0.8700664  | 0.14 | 16.2%  |
| AK076685 | 0          | 0.00 |        |
| AK076687 | 0.00602364 | 0.01 | 223.6% |
| AK076688 | 0          | 0.00 |        |
| AK076690 | 0.07746552 | 0.04 | 47.5%  |
| AK076692 | 0          | 0.00 |        |
| AK076700 | 0          | 0.00 |        |
| AK076701 | 0.2619692  | 0.07 | 25.2%  |
| AK076702 | 0          | 0.00 |        |
| AK076706 | 0          | 0.00 |        |
| AK076709 | 0.01481602 | 0.02 | 140.7% |
| AK076711 | 0          | 0.00 |        |
| AK076715 | 0          | 0.00 |        |
| AK076716 | 0.1907842  | 0.09 | 46.6%  |
| AK076722 | 0.0876587  | 0.06 | 72.7%  |
| AK076728 | 0          | 0.00 |        |
| AK076733 | 0          | 0.00 |        |
| AK076734 | 0.0149057  | 0.03 | 223.6% |
| AK076739 | 0.00398278 | 0.01 | 223.6% |
| AK076752 | 0.0015926  | 0.00 | 223.6% |
| AK076755 | 0          | 0.00 |        |
| AK076759 | 0.12944984 | 0.10 | 79.8%  |
| AK076771 | 0.05369084 | 0.04 | 72.4%  |
| AK076774 | 0          | 0.00 |        |
| AK076779 | 0.05137424 | 0.03 | 57.9%  |
| AK076783 | 0          | 0.00 |        |
| AK076784 | 0          | 0.00 |        |
| AK076785 | 0.00390082 | 0.01 | 223.6% |
| AK076789 | 0          | 0.00 |        |
| AK076790 | 0.0259748  | 0.06 | 223.6% |
| AK076794 | 0          | 0.00 |        |
| AK076796 | 0          | 0.00 |        |
| AK076800 | 0.01777384 | 0.04 | 223.6% |
| AK076805 | 0          | 0.00 |        |
| AK076808 | 0          | 0.00 |        |
| AK076809 | 0          | 0.00 |        |
| AK076817 | 0.00858628 | 0.02 | 223.6% |
| AK076827 | 0.0088541  | 0.02 | 223.6% |

|          |             |      |        |
|----------|-------------|------|--------|
| AK076831 | 0.01810854  | 0.03 | 144.0% |
| AK076839 | 0.3358682   | 0.10 | 31.2%  |
| AK076840 | 0.01112324  | 0.02 | 223.6% |
| AK076842 | 0           | 0.00 |        |
| AK076845 | 0           | 0.00 |        |
| AK076846 | 2.50023     | 0.09 | 3.5%   |
| AK076847 | 0           | 0.00 |        |
| AK076848 | 0           | 0.00 |        |
| AK076849 | 0.08226318  | 0.08 | 101.5% |
| AK076851 | 0           | 0.00 |        |
| AK076852 | 0           | 0.00 |        |
| AK076853 | 0           | 0.00 |        |
| AK076859 | 0.05272428  | 0.07 | 126.8% |
| AK076865 | 0           | 0.00 |        |
| AK076883 | 0.0227327   | 0.02 | 103.3% |
| AK076884 | 0           | 0.00 |        |
| AK076892 | 0           | 0.00 |        |
| AK076894 | 0           | 0.00 |        |
| AK076896 | 0           | 0.00 |        |
| AK076897 | 0.0124769   | 0.03 | 223.6% |
| AK076902 | 0           | 0.00 |        |
| AK076905 | 0           | 0.00 |        |
| AK076906 | 0           | 0.00 |        |
| AK076909 | 0           | 0.00 |        |
| AK076911 | 0           | 0.00 |        |
| AK076914 | 0           | 0.00 |        |
| AK076916 | 0.001958556 | 0.00 | 223.6% |
| AK076918 | 0           | 0.00 |        |
| AK076922 | 2.312174    | 0.37 | 16.0%  |
| AK076925 | 0.2194246   | 0.12 | 55.5%  |
| AK076929 | 0           | 0.00 |        |
| AK076930 | 0           | 0.00 |        |
| AK076931 | 0           | 0.00 |        |
| AK076935 | 0           | 0.00 |        |
| AK076937 | 0           | 0.00 |        |
| AK076938 | 0.00792002  | 0.02 | 223.6% |
| AK076939 | 0           | 0.00 |        |
| AK076945 | 0           | 0.00 |        |
| AK076946 | 0           | 0.00 |        |
| AK076947 | 0           | 0.00 |        |
| AK076949 | 0           | 0.00 |        |
| AK076950 | 0.14706208  | 0.09 | 64.1%  |
| AK076952 | 0           | 0.00 |        |
| AK076954 | 0           | 0.00 |        |
| AK076959 | 0           | 0.00 |        |
| AK076961 | 0           | 0.00 |        |
| AK076963 | 0           | 0.00 |        |

|          |            |      |        |
|----------|------------|------|--------|
| AK076965 | 0.00974642 | 0.02 | 223.6% |
| AK076966 | 0          | 0.00 |        |
| AK076976 | 0          | 0.00 |        |
| AK076978 | 0.998425   | 0.13 | 12.5%  |
| AK076979 | 0.09449886 | 0.08 | 82.9%  |
| AK076984 | 0.02811114 | 0.03 | 116.1% |
| AK076987 | 0.1276989  | 0.09 | 71.8%  |
| AK076988 | 0          | 0.00 |        |
| AK077008 | 0          | 0.00 |        |
| AK077029 | 0.00189406 | 0.00 | 223.6% |
| AK077035 | 0          | 0.00 |        |
| AK077040 | 1.9907244  | 1.38 | 69.4%  |
| AK077064 | 0          | 0.00 |        |
| AK077070 | 0          | 0.00 |        |
| AK077074 | 0.18013092 | 0.05 | 27.6%  |
| AK077115 | 0          | 0.00 |        |
| AK077134 | 0.04895436 | 0.09 | 176.1% |
| AK077135 | 0.0720385  | 0.03 | 37.5%  |
| AK077143 | 0          | 0.00 |        |
| AK077157 | 0          | 0.00 |        |
| AK077163 | 0.0443163  | 0.02 | 46.1%  |
| AK077166 | 0          | 0.00 |        |
| AK077175 | 0.00845382 | 0.01 | 94.0%  |
| AK077183 | 0.00799942 | 0.02 | 223.6% |
| AK077204 | 0.03844938 | 0.03 | 79.7%  |
| AK077272 | 0.0032599  | 0.01 | 223.6% |
| AK077315 | 3.14633    | 0.70 | 22.3%  |
| AK077350 | 0          | 0.00 |        |
| AK077353 | 0.02320118 | 0.01 | 30.2%  |
| AK077358 | 0.01561472 | 0.01 | 94.6%  |
| AK077398 | 0.969002   | 0.16 | 16.1%  |
| AK077405 | 0.04880158 | 0.04 | 73.2%  |
| AK077427 | 0.11907176 | 0.06 | 52.5%  |
| AK077474 | 0.3868198  | 0.10 | 26.8%  |
| AK077481 | 0.136882   | 0.11 | 81.4%  |
| AK077492 | 0.03661364 | 0.06 | 152.6% |
| AK077587 | 0.4112504  | 0.10 | 24.5%  |
| AK077682 | 0.2771234  | 0.10 | 35.5%  |
| AK077773 | 0.01245662 | 0.01 | 62.9%  |
| AK077811 | 0.06977228 | 0.04 | 55.8%  |
| AK077954 | 0.62373    | 0.19 | 31.2%  |
| AK078103 | 0.05082318 | 0.03 | 52.0%  |
| AK078122 | 0.3731558  | 0.13 | 35.1%  |
| AK078191 | 0.6427382  | 0.11 | 16.8%  |
| AK078255 | 0.12364692 | 0.10 | 83.2%  |
| AK078290 | 13.13658   | 0.89 | 6.8%   |
| AK078307 | 0.22643542 | 0.11 | 48.8%  |

|          |            |      |        |
|----------|------------|------|--------|
| AK078316 | 0.6633546  | 0.09 | 13.3%  |
| AK078321 | 1.0198728  | 0.17 | 17.1%  |
| AK078352 | 0.15691146 | 0.10 | 63.8%  |
| AK078363 | 0.3184542  | 0.15 | 48.0%  |
| AK078367 | 0          | 0.00 |        |
| AK078446 | 0.2304132  | 0.03 | 12.3%  |
| AK078466 | 0.1761001  | 0.11 | 61.5%  |
| AK078566 | 0.08634938 | 0.06 | 66.2%  |
| AK078606 | 0.01553984 | 0.02 | 103.8% |
| AK078660 | 0.3132334  | 0.07 | 22.2%  |
| AK078705 | 0          | 0.00 |        |
| AK078711 | 4.291988   | 0.30 | 7.1%   |
| AK078712 | 0.10804812 | 0.05 | 44.7%  |
| AK078754 | 0.390478   | 0.07 | 18.2%  |
| AK078772 | 0          | 0.00 |        |
| AK078795 | 22.58572   | 0.57 | 2.5%   |
| AK078801 | 0.18298898 | 0.08 | 44.4%  |
| AK078896 | 0.01194226 | 0.03 | 223.6% |
| AK078907 | 0          | 0.00 |        |
| AK078931 | 0          | 0.00 |        |
| AK078932 | 0.1477332  | 0.15 | 104.2% |
| AK078937 | 0.2112696  | 0.09 | 40.8%  |
| AK078949 | 0          | 0.00 |        |
| AK078979 | 0.357092   | 0.06 | 17.2%  |
| AK078991 | 0          | 0.00 |        |
| AK079003 | 0          | 0.00 |        |
| AK079012 | 0          | 0.00 |        |
| AK079017 | 0.04678344 | 0.04 | 79.1%  |
| AK079018 | 0          | 0.00 |        |
| AK079019 | 0          | 0.00 |        |
| AK079034 | 0.12594188 | 0.05 | 42.8%  |
| AK079066 | 0          | 0.00 |        |
| AK079188 | 0.0690003  | 0.03 | 39.0%  |
| AK079194 | 0.2069564  | 0.06 | 27.8%  |
| AK079222 | 0          | 0.00 |        |
| AK079255 | 0.195449   | 0.03 | 15.6%  |
| AK079263 | 0.312072   | 0.05 | 15.2%  |
| AK079280 | 0.3541088  | 0.10 | 28.4%  |
| AK079285 | 1.8924172  | 1.04 | 54.9%  |
| AK079377 | 0.06545518 | 0.05 | 78.5%  |
| AK079380 | 1.676976   | 0.13 | 7.7%   |
| AK079403 | 0.18449936 | 0.07 | 36.6%  |
| AK079404 | 0.01007722 | 0.00 | 46.0%  |
| AK079438 | 0          | 0.00 |        |
| AK079527 | 0.07559054 | 0.04 | 54.7%  |
| AK079595 | 0          | 0.00 |        |
| AK079637 | 0.13831626 | 0.08 | 58.0%  |

|          |             |      |        |
|----------|-------------|------|--------|
| AK079660 | 0.0113942   | 0.01 | 103.1% |
| AK079662 | 0           | 0.00 |        |
| AK079670 | 0           | 0.00 |        |
| AK079675 | 0           | 0.00 |        |
| AK079699 | 0.646943    | 0.16 | 24.3%  |
| AK079709 | 0.06303826  | 0.08 | 129.9% |
| AK079713 | 0           | 0.00 |        |
| AK079714 | 0           | 0.00 |        |
| AK079730 | 0.2004168   | 0.07 | 33.8%  |
| AK079754 | 0.6745108   | 0.09 | 14.0%  |
| AK079763 | 0           | 0.00 |        |
| AK079777 | 0.5928928   | 0.10 | 17.0%  |
| AK079798 | 0           | 0.00 |        |
| AK079802 | 0           | 0.00 |        |
| AK079804 | 0.04940884  | 0.05 | 92.8%  |
| AK079812 | 0.001942854 | 0.00 | 223.6% |
| AK079813 | 9.84758E-05 | 0.00 | 223.6% |
| AK079818 | 0           | 0.00 |        |
| AK079855 | 16.5412     | 1.07 | 6.5%   |
| AK079857 | 0           | 0.00 |        |
| AK079861 | 0.05609228  | 0.02 | 35.7%  |
| AK079912 | 0.0713465   | 0.06 | 80.0%  |
| AK079920 | 0.1745332   | 0.05 | 28.0%  |
| AK079921 | 0           | 0.00 |        |
| AK079929 | 0.00576662  | 0.01 | 223.6% |
| AK079938 | 0           | 0.00 |        |
| AK079939 | 0.5741436   | 0.16 | 27.9%  |
| AK079953 | 0           | 0.00 |        |
| AK079954 | 0           | 0.00 |        |
| AK079957 | 0.16537862  | 0.07 | 43.7%  |
| AK079958 | 0.01417092  | 0.03 | 223.6% |
| AK079994 | 0.02917792  | 0.03 | 107.5% |
| AK080009 | 0.00268562  | 0.01 | 223.6% |
| AK080010 | 0           | 0.00 |        |
| AK080030 | 0.01493764  | 0.02 | 141.2% |
| AK080051 | 0.1302609   | 0.06 | 46.2%  |
| AK080057 | 0           | 0.00 |        |
| AK080063 | 0           | 0.00 |        |
| AK080070 | 0.00733494  | 0.02 | 223.6% |
| AK080084 | 1.7077726   | 1.15 | 67.2%  |
| AK080092 | 0           | 0.00 |        |
| AK080102 | 0.0103265   | 0.02 | 223.6% |
| AK080141 | 0.2654574   | 0.02 | 8.4%   |
| AK080151 | 0           | 0.00 |        |
| AK080160 | 0.11560286  | 0.03 | 29.4%  |
| AK080165 | 0.10761304  | 0.09 | 88.0%  |
| AK080168 | 0           | 0.00 |        |

|          |             |      |        |
|----------|-------------|------|--------|
| AK080173 | 0.9172812   | 0.53 | 57.7%  |
| AK080176 | 2.310364    | 0.08 | 3.6%   |
| AK080187 | 0.06390928  | 0.02 | 29.2%  |
| AK080222 | 0.3817864   | 0.07 | 17.1%  |
| AK080223 | 0.04909146  | 0.05 | 110.5% |
| AK080247 | 0           | 0.00 |        |
| AK080258 | 0.04119198  | 0.03 | 60.8%  |
| AK080278 | 0.2432502   | 0.10 | 42.6%  |
| AK080292 | 0.3822794   | 0.07 | 19.3%  |
| AK080296 | 0.9626222   | 0.19 | 20.2%  |
| AK080311 | 0           | 0.00 |        |
| AK080343 | 0           | 0.00 |        |
| AK080350 | 6.662766    | 1.39 | 20.9%  |
| AK080351 | 0           | 0.00 |        |
| AK080352 | 0.0229281   | 0.03 | 138.6% |
| AK080367 | 0.0970927   | 0.02 | 24.8%  |
| AK080383 | 0.8647558   | 0.40 | 46.6%  |
| AK080399 | 0.13632892  | 0.04 | 26.0%  |
| AK080411 | 0.544314    | 0.11 | 19.3%  |
| AK080416 | 0.15459832  | 0.12 | 80.7%  |
| AK080422 | 0           | 0.00 |        |
| AK080425 | 0.02822252  | 0.04 | 144.7% |
| AK080443 | 0.05773286  | 0.05 | 78.2%  |
| AK080484 | 0.012718136 | 0.02 | 129.0% |
| AK080597 | 40.04502    | 2.40 | 6.0%   |
| AK080631 | 0.0270527   | 0.03 | 97.5%  |
| AK080648 | 0.13793726  | 0.07 | 49.1%  |
| AK080650 | 1.0474408   | 0.44 | 42.3%  |
| AK080655 | 0.8242058   | 0.37 | 45.2%  |
| AK080656 | 27.02786    | 0.62 | 2.3%   |
| AK080657 | 0.00387908  | 0.01 | 223.6% |
| AK080663 | 0.13006658  | 0.11 | 83.7%  |
| AK080684 | 0.4627096   | 0.23 | 49.5%  |
| AK080695 | 0           | 0.00 |        |
| AK080710 | 0.00227956  | 0.01 | 223.6% |
| AK080719 | 0.9342606   | 0.17 | 17.9%  |
| AK080816 | 0.05653696  | 0.03 | 58.6%  |
| AK080857 | 0.4045992   | 0.10 | 24.3%  |
| AK080902 | 0           | 0.00 |        |
| AK080946 | 8.308738    | 1.48 | 17.8%  |
| AK080982 | 0.01047048  | 0.01 | 107.4% |
| AK080999 | 0.0520051   | 0.04 | 70.8%  |
| AK081086 | 0           | 0.00 |        |
| AK081104 | 0           | 0.00 |        |
| AK081136 | 2.433038    | 0.35 | 14.2%  |
| AK081140 | 0.2507442   | 0.02 | 6.7%   |
| AK081193 | 7.598908    | 0.77 | 10.2%  |



|          |             |      |        |
|----------|-------------|------|--------|
| AK081204 | 3.206614    | 0.32 | 9.9%   |
| AK081244 | 4.253534    | 0.94 | 22.2%  |
| AK081271 | 0.00743554  | 0.02 | 223.6% |
| AK081407 | 2.200912    | 0.36 | 16.5%  |
| AK081414 | 0.7223274   | 0.09 | 11.8%  |
| AK081497 | 1.916318    | 0.18 | 9.5%   |
| AK081540 | 0           | 0.00 |        |
| AK081570 | 2.054632    | 0.63 | 30.6%  |
| AK081581 | 2.964512    | 0.74 | 24.8%  |
| AK081588 | 0.2592198   | 0.13 | 49.0%  |
| AK081763 | 0.2227566   | 0.07 | 29.5%  |
| AK081788 | 0.006024222 | 0.00 | 72.3%  |
| AK081794 | 0.00963174  | 0.02 | 223.6% |
| AK081796 | 0.6433392   | 0.14 | 21.0%  |
| AK081809 | 0.00617536  | 0.01 | 137.3% |
| AK081879 | 6.409558    | 0.80 | 12.4%  |
| AK081945 | 0           | 0.00 |        |
| AK081964 | 0.0038226   | 0.01 | 223.6% |
| AK081990 | 3.229344    | 0.35 | 11.0%  |
| AK082063 | 0.09349816  | 0.06 | 68.6%  |
| AK082072 | 1.5497208   | 0.44 | 28.5%  |
| AK082086 | 0.02469598  | 0.03 | 104.6% |
| AK082096 | 14.77894    | 0.77 | 5.2%   |
| AK082104 | 0           | 0.00 |        |
| AK082110 | 0.21377438  | 0.22 | 105.2% |
| AK082117 | 0.05460738  | 0.03 | 47.8%  |
| AK082148 | 0           | 0.00 |        |
| AK082200 | 0.3143642   | 0.06 | 18.9%  |
| AK082250 | 3.31024732  | 4.67 | 141.0% |
| AK082264 | 0.4558456   | 0.10 | 20.9%  |
| AK082307 | 0.3019972   | 0.10 | 31.6%  |
| AK082314 | 0           | 0.00 |        |
| AK082325 | 1.235088    | 0.16 | 13.2%  |
| AK082432 | 0.1050114   | 0.03 | 32.1%  |
| AK082440 | 0           | 0.00 |        |
| AK082462 | 0.3686258   | 0.30 | 81.3%  |
| AK082467 | 0.55356618  | 0.54 | 98.2%  |
| AK082503 | 0.000878936 | 0.00 | 223.6% |
| AK082514 | 0           | 0.00 |        |
| AK082553 | 0.22624242  | 0.08 | 36.9%  |
| AK082555 | 0.49874402  | 0.66 | 131.8% |
| AK082624 | 18.99766    | 0.86 | 4.5%   |
| AK082625 | 44.64658    | 2.51 | 5.6%   |
| AK082685 | 12.63698    | 0.66 | 5.2%   |
| AK082693 | 0           | 0.00 |        |
| AK082720 | 0.04787272  | 0.04 | 82.4%  |
| AK082731 | 2.898812    | 0.43 | 14.7%  |

|          |             |      |        |
|----------|-------------|------|--------|
| AK082757 | 14.9442     | 1.51 | 10.1%  |
| AK082764 | 0.01476738  | 0.02 | 139.6% |
| AK082779 | 0.6710202   | 0.34 | 50.7%  |
| AK082801 | 3.305218    | 0.77 | 23.4%  |
| AK082813 | 0           | 0.00 |        |
| AK082841 | 1.1541252   | 0.52 | 45.0%  |
| AK082845 | 0.00537694  | 0.01 | 223.6% |
| AK082857 | 2.285534    | 0.23 | 9.9%   |
| AK082862 | 0           | 0.00 |        |
| AK082869 | 0.02278492  | 0.00 | 14.0%  |
| AK082896 | 1.32948     | 0.16 | 12.0%  |
| AK082921 | 3.52411     | 0.20 | 5.8%   |
| AK082948 | 0           | 0.00 |        |
| AK082954 | 0.1672078   | 0.04 | 24.6%  |
| AK083021 | 2.920956    | 0.86 | 29.5%  |
| AK083030 | 0.5509956   | 0.45 | 81.5%  |
| AK083054 | 0.2170212   | 0.02 | 11.2%  |
| AK083124 | 1.777074    | 0.18 | 9.9%   |
| AK083149 | 0.1554118   | 0.07 | 43.0%  |
| AK083150 | 0.01319092  | 0.02 | 150.7% |
| AK083177 | 0           | 0.00 |        |
| AK083190 | 1.487104    | 0.16 | 10.8%  |
| AK083195 | 0.5467814   | 0.21 | 39.2%  |
| AK083197 | 13.6952     | 0.58 | 4.3%   |
| AK083200 | 1.919744    | 0.37 | 19.4%  |
| AK083203 | 0.12158132  | 0.04 | 32.0%  |
| AK083230 | 0.341536    | 0.12 | 33.7%  |
| AK083252 | 0.07722616  | 0.03 | 34.7%  |
| AK083296 | 0.03322148  | 0.01 | 39.4%  |
| AK083339 | 0           | 0.00 |        |
| AK083382 | 4.0149      | 0.31 | 7.7%   |
| AK083547 | 0.7513118   | 0.04 | 4.9%   |
| AK083567 | 4.47803     | 0.48 | 10.7%  |
| AK083606 | 0.00547036  | 0.01 | 141.2% |
| AK083703 | 0           | 0.00 |        |
| AK083706 | 0.035897466 | 0.02 | 48.5%  |
| AK083757 | 0.0821843   | 0.03 | 41.6%  |
| AK083771 | 0.03791632  | 0.04 | 107.4% |
| AK083777 | 0.0596659   | 0.03 | 48.0%  |
| AK083927 | 0.1444248   | 0.06 | 43.8%  |
| AK083994 | 0.02984058  | 0.03 | 101.5% |
| AK084028 | 0.0395728   | 0.01 | 29.2%  |
| AK084059 | 0.04923392  | 0.04 | 71.3%  |
| AK084074 | 0.01497308  | 0.00 | 27.2%  |
| AK084081 | 0.057082    | 0.03 | 52.2%  |
| AK084170 | 0.2906214   | 0.05 | 17.4%  |
| AK084200 | 0.03054296  | 0.02 | 73.8%  |

|          |             |      |        |
|----------|-------------|------|--------|
| AK084265 | 0.03651762  | 0.05 | 142.1% |
| AK084270 | 0.00954092  | 0.01 | 138.4% |
| AK084284 | 0.6237744   | 0.13 | 20.6%  |
| AK084356 | 0           | 0.00 |        |
| AK084362 | 2.814886    | 0.34 | 12.2%  |
| AK084432 | 0           | 0.00 |        |
| AK084470 | 0.7665412   | 0.22 | 28.2%  |
| AK084486 | 0.04364634  | 0.02 | 43.6%  |
| AK084494 | 0.19479094  | 0.12 | 59.5%  |
| AK084504 | 0.1857536   | 0.08 | 45.3%  |
| AK084517 | 0.18114446  | 0.09 | 49.8%  |
| AK084554 | 0           | 0.00 |        |
| AK084560 | 0.11226694  | 0.06 | 51.4%  |
| AK084599 | 0           | 0.00 |        |
| AK084679 | 0.00172473  | 0.00 | 223.6% |
| AK084741 | 1.675776    | 0.23 | 13.7%  |
| AK084744 | 0           | 0.00 |        |
| AK084778 | 2.43984     | 0.36 | 14.8%  |
| AK084809 | 0.5890682   | 0.10 | 17.3%  |
| AK084828 | 0.00790496  | 0.02 | 223.6% |
| AK084954 | 0.5841186   | 0.12 | 20.9%  |
| AK085062 | 0.09981136  | 0.05 | 49.5%  |
| AK085125 | 0.25244614  | 0.22 | 86.4%  |
| AK085136 | 6.449434    | 1.39 | 21.5%  |
| AK085172 | 0.0045076   | 0.01 | 223.6% |
| AK085201 | 0.00788628  | 0.01 | 161.7% |
| AK085253 | 0           | 0.00 |        |
| AK085274 | 0.1740228   | 0.04 | 23.1%  |
| AK085275 | 0.09382764  | 0.04 | 44.2%  |
| AK085279 | 0           | 0.00 |        |
| AK085287 | 0.07405012  | 0.04 | 52.5%  |
| AK085300 | 0.00665484  | 0.01 | 137.3% |
| AK085305 | 0.04077452  | 0.01 | 17.0%  |
| AK085316 | 0           | 0.00 |        |
| AK085322 | 0           | 0.00 |        |
| AK085325 | 0.04995404  | 0.03 | 67.4%  |
| AK085337 | 0.3066112   | 0.05 | 15.2%  |
| AK085341 | 0.347882    | 0.09 | 25.7%  |
| AK085342 | 0.010600532 | 0.01 | 108.6% |
| AK085353 | 0           | 0.00 |        |
| AK085365 | 2.600972    | 0.62 | 23.7%  |
| AK085371 | 0.1853372   | 0.05 | 28.2%  |
| AK085384 | 0.4288662   | 0.03 | 7.3%   |
| AK085396 | 0.1727688   | 0.04 | 23.5%  |
| AK085420 | 0           | 0.00 |        |
| AK085428 | 0           | 0.00 |        |
| AK085438 | 0.1048564   | 0.09 | 88.8%  |

|          |            |      |        |
|----------|------------|------|--------|
| AK085456 | 0          | 0.00 |        |
| AK085459 | 0.12458632 | 0.07 | 54.3%  |
| AK085477 | 0.07854204 | 0.06 | 75.2%  |
| AK085480 | 0          | 0.00 |        |
| AK085522 | 0.06237074 | 0.07 | 118.3% |
| AK085533 | 0          | 0.00 |        |
| AK085535 | 0          | 0.00 |        |
| AK085570 | 0.01385198 | 0.02 | 138.5% |
| AK085609 | 0.02372034 | 0.02 | 93.1%  |
| AK085625 | 1.389938   | 0.43 | 31.1%  |
| AK085632 | 0          | 0.00 |        |
| AK085652 | 0          | 0.00 |        |
| AK085758 | 0          | 0.00 |        |
| AK085760 | 0.03293278 | 0.01 | 37.8%  |
| AK085761 | 0.0751164  | 0.05 | 71.1%  |
| AK085762 | 0          | 0.00 |        |
| AK085764 | 0          | 0.00 |        |
| AK085768 | 0          | 0.00 |        |
| AK085771 | 0          | 0.00 |        |
| AK085792 | 0          | 0.00 |        |
| AK085818 | 0          | 0.00 |        |
| AK085876 | 0.4466654  | 0.07 | 14.9%  |
| AK085881 | 0          | 0.00 |        |
| AK085889 | 0.08591892 | 0.06 | 70.5%  |
| AK085891 | 0.177235   | 0.04 | 20.2%  |
| AK085912 | 0          | 0.00 |        |
| AK085942 | 0.2224758  | 0.09 | 38.4%  |
| AK085943 | 0          | 0.00 |        |
| AK085944 | 0.6550552  | 0.11 | 16.4%  |
| AK085963 | 0.93821444 | 1.25 | 132.7% |
| AK085969 | 0.4473704  | 0.05 | 10.2%  |
| AK085972 | 0          | 0.00 |        |
| AK085986 | 0          | 0.00 |        |
| AK085995 | 0.07194672 | 0.03 | 39.1%  |
| AK086005 | 0.01837862 | 0.04 | 223.6% |
| AK086006 | 0.0103468  | 0.02 | 223.6% |
| AK086010 | 0.1294564  | 0.03 | 24.2%  |
| AK086013 | 0          | 0.00 |        |
| AK086039 | 0          | 0.00 |        |
| AK086050 | 10.141132  | 0.65 | 6.4%   |
| AK086087 | 1.1343784  | 0.24 | 21.2%  |
| AK086149 | 0.7969188  | 0.17 | 20.7%  |
| AK086164 | 0.11836746 | 0.04 | 37.8%  |
| AK086168 | 0.06498518 | 0.02 | 29.8%  |
| AK086245 | 0.00723994 | 0.02 | 223.6% |
| AK086273 | 0.229978   | 0.06 | 26.8%  |
| AK086288 | 0.00871582 | 0.02 | 223.6% |

|          |            |      |        |
|----------|------------|------|--------|
| AK086290 | 1.34298    | 0.22 | 16.7%  |
| AK086315 | 1.68595    | 0.25 | 14.7%  |
| AK086341 | 0.4199454  | 0.14 | 34.3%  |
| AK086355 | 37.58588   | 1.98 | 5.3%   |
| AK086375 | 0.4618434  | 0.06 | 13.3%  |
| AK086420 | 0.01445766 | 0.02 | 137.6% |
| AK086439 | 0          | 0.00 |        |
| AK086455 | 0.0903297  | 0.01 | 7.7%   |
| AK086460 | 0.2105634  | 0.04 | 19.7%  |
| AK086477 | 9.158076   | 1.31 | 14.3%  |
| AK086522 | 0          | 0.00 |        |
| AK086534 | 43.92226   | 7.15 | 16.3%  |
| AK086556 | 0.08357652 | 0.02 | 21.3%  |
| AK086602 | 0.59948306 | 0.43 | 71.8%  |
| AK086654 | 0.2572904  | 0.14 | 55.6%  |
| AK086660 | 0          | 0.00 |        |
| AK086712 | 0.779973   | 0.07 | 8.9%   |
| AK086736 | 0.7116214  | 0.14 | 19.7%  |
| AK086741 | 0.3658908  | 0.09 | 24.6%  |
| AK086749 | 1.798484   | 0.30 | 16.7%  |
| AK086758 | 3.681058   | 0.63 | 17.0%  |
| AK086793 | 0.5747056  | 0.12 | 20.9%  |
| AK086826 | 0.3828636  | 0.04 | 11.4%  |
| AK086852 | 0.557539   | 0.14 | 24.4%  |
| AK086861 | 2.164616   | 0.39 | 18.1%  |
| AK086881 | 6.755986   | 0.64 | 9.5%   |
| AK086911 | 0.01324964 | 0.01 | 62.8%  |
| AK086914 | 1.814946   | 0.49 | 26.7%  |
| AK086943 | 0          | 0.00 |        |
| AK086952 | 0.5618728  | 0.11 | 18.9%  |
| AK086959 | 0          | 0.00 |        |
| AK086971 | 0          | 0.00 |        |
| AK087024 | 0.0414831  | 0.03 | 72.8%  |
| AK087045 | 0          | 0.00 |        |
| AK087094 | 0.04896236 | 0.05 | 100.0% |
| AK087115 | 0.00315616 | 0.01 | 223.6% |
| AK087124 | 2.781572   | 0.15 | 5.5%   |
| AK087178 | 0          | 0.00 |        |
| AK087181 | 0          | 0.00 |        |
| AK087201 | 0          | 0.00 |        |
| AK087209 | 0          | 0.00 |        |
| AK087218 | 1.295636   | 0.34 | 26.5%  |
| AK087231 | 0.01579398 | 0.00 | 13.4%  |
| AK087237 | 0.06818996 | 0.02 | 22.8%  |
| AK087248 | 2.654352   | 0.33 | 12.5%  |
| AK087264 | 0.0247047  | 0.01 | 51.5%  |
| AK087278 | 0          | 0.00 |        |

|          |             |      |        |
|----------|-------------|------|--------|
| AK087290 | 0.23015922  | 0.20 | 87.8%  |
| AK087292 | 0           | 0.00 |        |
| AK087295 | 0           | 0.00 |        |
| AK087313 | 0           | 0.00 |        |
| AK087338 | 0.01057362  | 0.02 | 147.6% |
| AK087340 | 0.03860916  | 0.02 | 59.9%  |
| AK087351 | 0.03464306  | 0.05 | 144.2% |
| AK087376 | 0.5561528   | 0.16 | 28.3%  |
| AK087382 | 0.02327942  | 0.02 | 94.4%  |
| AK087392 | 0           | 0.00 |        |
| AK087393 | 0.3225472   | 0.15 | 45.0%  |
| AK087460 | 0.00911406  | 0.01 | 144.7% |
| AK087464 | 0.6411252   | 0.23 | 35.3%  |
| AK087483 | 4.501022    | 0.31 | 6.9%   |
| AK087504 | 19.18276    | 0.66 | 3.4%   |
| AK087529 | 0.8078542   | 0.10 | 12.1%  |
| AK087569 | 0.0471807   | 0.02 | 44.4%  |
| AK087581 | 0           | 0.00 |        |
| AK087604 | 1.80881     | 0.31 | 17.2%  |
| AK087624 | 0.04499164  | 0.04 | 90.7%  |
| AK087644 | 0.0945798   | 0.10 | 108.5% |
| AK087650 | 0.0053767   | 0.01 | 223.6% |
| AK087691 | 0.00724364  | 0.02 | 223.6% |
| AK087699 | 0           | 0.00 |        |
| AK087718 | 0.12409572  | 0.05 | 41.7%  |
| AK087719 | 0           | 0.00 |        |
| AK087725 | 0.2487436   | 0.05 | 20.9%  |
| AK087735 | 0.17341484  | 0.06 | 37.4%  |
| AK087736 | 0           | 0.00 |        |
| AK087740 | 0.02496442  | 0.00 | 19.5%  |
| AK087743 | 1.0429174   | 0.23 | 22.3%  |
| AK087744 | 0           | 0.00 |        |
| AK087755 | 0.09753234  | 0.04 | 38.1%  |
| AK087762 | 0.019436416 | 0.02 | 90.6%  |
| AK087784 | 0.004157866 | 0.01 | 138.9% |
| AK087806 | 0.09702764  | 0.07 | 67.1%  |
| AK087850 | 0.524502    | 0.18 | 34.3%  |
| AK087886 | 0.0145466   | 0.02 | 137.1% |
| AK087905 | 5.812916    | 1.56 | 26.8%  |
| AK088092 | 0.05983242  | 0.03 | 55.6%  |
| AK088204 | 3.481848    | 0.29 | 8.2%   |
| AK088368 | 0.0307587   | 0.02 | 77.6%  |
| AK088579 | 0.0076361   | 0.02 | 223.6% |
| AK088734 | 0.06005364  | 0.03 | 52.7%  |
| AK088743 | 0.08739926  | 0.04 | 40.4%  |
| AK088822 | 0.02935776  | 0.01 | 34.6%  |
| AK088877 | 0           | 0.00 |        |

|          |             |      |        |
|----------|-------------|------|--------|
| AK088880 | 0           | 0.00 |        |
| AK088897 | 2.963436    | 0.43 | 14.6%  |
| AK088911 | 0.0025766   | 0.01 | 223.6% |
| AK088914 | 1.74349     | 0.18 | 10.0%  |
| AK088920 | 5.337892    | 0.59 | 11.1%  |
| AK088937 | 0           | 0.00 |        |
| AK088959 | 0.2106372   | 0.10 | 45.4%  |
| AK088966 | 0.1731084   | 0.39 | 223.6% |
| AK089020 | 0           | 0.00 |        |
| AK089049 | 0           | 0.00 |        |
| AK089118 | 0.4184086   | 0.16 | 38.8%  |
| AK089123 | 0.00894106  | 0.01 | 137.8% |
| AK089155 | 0.06496956  | 0.05 | 76.9%  |
| AK089217 | 0.1001014   | 0.08 | 76.6%  |
| AK089365 | 0.03909384  | 0.01 | 31.5%  |
| AK089373 | 0.4065372   | 0.13 | 32.7%  |
| AK089375 | 0.00492052  | 0.01 | 223.6% |
| AK089379 | 0.05094096  | 0.02 | 40.8%  |
| AK089406 | 0.0031934   | 0.01 | 223.6% |
| AK089468 | 0           | 0.00 |        |
| AK089512 | 0.00825176  | 0.01 | 93.3%  |
| AK089514 | 1.436886    | 0.19 | 13.2%  |
| AK089519 | 0           | 0.00 |        |
| AK089615 | 0.0039491   | 0.01 | 223.6% |
| AK089801 | 0           | 0.00 |        |
| AK089914 | 0.0043421   | 0.01 | 223.6% |
| AK089981 | 0           | 0.00 |        |
| AK090016 | 1.3157754   | 1.30 | 98.5%  |
| AK090048 | 0.04659164  | 0.02 | 47.2%  |
| AK090061 | 0           | 0.00 |        |
| AK090072 | 0.4339692   | 0.18 | 41.7%  |
| AK090150 | 0.0140792   | 0.02 | 140.0% |
| AK090163 | 0.162758    | 0.05 | 31.4%  |
| AK090172 | 0.027159892 | 0.02 | 66.8%  |
| AK090187 | 0.011989504 | 0.01 | 109.8% |
| AK090209 | 0           | 0.00 |        |
| AK090249 | 3.256132    | 0.44 | 13.5%  |
| AK090251 | 0.00609836  | 0.01 | 223.6% |
| AK090261 | 2.750024    | 0.31 | 11.3%  |
| AK090268 | 0.02388792  | 0.02 | 102.6% |
| AK090336 | 17.21426    | 0.71 | 4.1%   |
| AK090337 | 0           | 0.00 |        |
| AK090359 | 0           | 0.00 |        |
| AK090372 | 0.02489468  | 0.02 | 94.4%  |
| Ak1      | 52.29768    | 2.53 | 4.8%   |
| AK122209 | 3.345404    | 0.25 | 7.6%   |
| AK122507 | 7.136774    | 0.58 | 8.2%   |

|          |             |      |        |
|----------|-------------|------|--------|
| AK122525 | 0.9762154   | 0.03 | 3.2%   |
| AK129128 | 4.81156     | 0.13 | 2.7%   |
| AK129160 | 1.1307564   | 0.31 | 27.2%  |
| AK129302 | 11.78114    | 0.44 | 3.8%   |
| AK129341 | 2.04608     | 0.22 | 10.9%  |
| AK129421 | 3.982668    | 0.38 | 9.5%   |
| AK131678 | 0.0578655   | 0.03 | 48.6%  |
| AK131696 | 0           | 0.00 |        |
| AK131712 | 0.01387218  | 0.01 | 94.5%  |
| AK131719 | 0.0311996   | 0.04 | 118.5% |
| AK131739 | 0.03978744  | 0.04 | 105.7% |
| AK131740 | 0           | 0.00 |        |
| AK131742 | 0           | 0.00 |        |
| AK131746 | 0.0251201   | 0.02 | 83.1%  |
| AK131759 | 0           | 0.00 |        |
| AK131776 | 0           | 0.00 |        |
| AK131781 | 0           | 0.00 |        |
| AK131804 | 0           | 0.00 |        |
| AK131819 | 0.09052024  | 0.05 | 59.4%  |
| AK131821 | 0.01706122  | 0.02 | 141.5% |
| AK131825 | 0.05356732  | 0.04 | 77.7%  |
| AK131826 | 0           | 0.00 |        |
| AK131831 | 0.10139496  | 0.06 | 57.5%  |
| AK131834 | 0.4646584   | 0.16 | 33.7%  |
| AK131839 | 0.03375474  | 0.04 | 107.6% |
| AK131860 | 0.00714872  | 0.02 | 223.6% |
| AK131873 | 0.00867774  | 0.02 | 223.6% |
| AK131876 | 0           | 0.00 |        |
| AK131895 | 0.06722818  | 0.06 | 86.9%  |
| AK131900 | 0.14244534  | 0.03 | 24.1%  |
| AK131952 | 0.0059292   | 0.01 | 223.6% |
| AK132074 | 0           | 0.00 |        |
| AK132076 | 0.00839208  | 0.02 | 223.6% |
| AK132077 | 0.6686532   | 0.14 | 20.7%  |
| AK132084 | 0           | 0.00 |        |
| AK132123 | 0.15886924  | 0.07 | 43.1%  |
| AK132134 | 0           | 0.00 |        |
| AK132154 | 0.04533612  | 0.03 | 69.7%  |
| AK132189 | 0.0273206   | 0.01 | 50.0%  |
| AK132190 | 0           | 0.00 |        |
| AK132299 | 0.9331046   | 0.10 | 10.5%  |
| AK132321 | 8.633654    | 0.76 | 8.8%   |
| AK132380 | 0.009904478 | 0.01 | 68.0%  |
| AK132440 | 0.3013116   | 0.07 | 23.0%  |
| AK132460 | 2.487798    | 0.40 | 16.2%  |
| AK132462 | 0           | 0.00 |        |
| AK132490 | 0.08504598  | 0.02 | 19.7%  |



|          |             |      |        |
|----------|-------------|------|--------|
| AK132555 | 0.016214918 | 0.01 | 55.8%  |
| AK132605 | 0           | 0.00 |        |
| AK132606 | 5.494612    | 0.29 | 5.3%   |
| AK132630 | 0.951589    | 0.06 | 6.1%   |
| AK132658 | 0           | 0.00 |        |
| AK132681 | 0.4209322   | 0.09 | 22.5%  |
| AK132687 | 0           | 0.00 |        |
| AK132712 | 0.02514204  | 0.02 | 96.5%  |
| AK132719 | 0           | 0.00 |        |
| AK132720 | 0.0605921   | 0.01 | 13.9%  |
| AK132723 | 0.11091516  | 0.03 | 27.1%  |
| AK132724 | 0.914972    | 0.47 | 51.5%  |
| AK132729 | 0.032336    | 0.03 | 98.4%  |
| AK132743 | 0           | 0.00 |        |
| AK132765 | 1.482596    | 0.47 | 31.9%  |
| AK132798 | 0.1979628   | 0.02 | 9.9%   |
| AK132828 | 0.0657842   | 0.05 | 72.9%  |
| AK132829 | 0.3305596   | 0.21 | 64.6%  |
| AK132836 | 0           | 0.00 |        |
| AK132847 | 0           | 0.00 |        |
| AK132865 | 0.01566732  | 0.04 | 223.6% |
| AK132872 | 0.00511034  | 0.01 | 223.6% |
| AK132885 | 1.1105376   | 0.18 | 15.9%  |
| AK132898 | 0           | 0.00 |        |
| AK132902 | 0           | 0.00 |        |
| AK132929 | 0           | 0.00 |        |
| AK132930 | 0.2578356   | 0.10 | 39.3%  |
| AK132940 | 0.00187102  | 0.00 | 223.6% |
| AK132955 | 1.121484    | 0.06 | 5.7%   |
| AK132957 | 0           | 0.00 |        |
| AK132958 | 0           | 0.00 |        |
| AK132982 | 0.06173718  | 0.02 | 40.3%  |
| AK133007 | 0           | 0.00 |        |
| AK133010 | 0.00417078  | 0.01 | 223.6% |
| AK133014 | 0           | 0.00 |        |
| AK133017 | 0.04456118  | 0.08 | 174.1% |
| AK133024 | 0.0054685   | 0.01 | 223.6% |
| AK133032 | 0           | 0.00 |        |
| AK133035 | 0.04156372  | 0.02 | 41.2%  |
| AK133038 | 0.00291596  | 0.01 | 223.6% |
| AK133046 | 0.11240858  | 0.07 | 63.6%  |
| AK133078 | 0           | 0.00 |        |
| AK133093 | 0           | 0.00 |        |
| AK133134 | 0.00476916  | 0.01 | 223.6% |
| AK133139 | 0.1779996   | 0.05 | 27.9%  |
| AK133142 | 0.1122057   | 0.05 | 40.1%  |
| AK133153 | 0.0755507   | 0.02 | 32.2%  |

|          |             |      |        |
|----------|-------------|------|--------|
| AK133155 | 0.00254916  | 0.01 | 223.6% |
| AK133166 | 0.022412554 | 0.02 | 76.2%  |
| AK133167 | 0.00608237  | 0.01 | 93.9%  |
| AK133186 | 0           | 0.00 |        |
| AK133227 | 0.00912588  | 0.01 | 157.4% |
| AK133228 | 0.12462608  | 0.14 | 112.4% |
| AK133246 | 0.00291902  | 0.01 | 223.6% |
| AK133250 | 0.00224588  | 0.01 | 223.6% |
| AK133285 | 0.02040778  | 0.03 | 139.5% |
| AK133303 | 0           | 0.00 |        |
| AK133324 | 10.81998    | 0.44 | 4.0%   |
| AK133329 | 1.780384    | 0.13 | 7.4%   |
| AK133333 | 0.0145861   | 0.00 | 24.8%  |
| AK133337 | 0           | 0.00 |        |
| AK133365 | 0           | 0.00 |        |
| AK133372 | 0           | 0.00 |        |
| AK133391 | 0.5000512   | 0.13 | 25.5%  |
| AK133438 | 0.06829718  | 0.04 | 61.3%  |
| AK133446 | 0           | 0.00 |        |
| AK133627 | 0.09056662  | 0.02 | 18.7%  |
| AK133643 | 0.00849924  | 0.01 | 137.0% |
| AK133650 | 0.9213534   | 0.17 | 18.2%  |
| AK133727 | 0           | 0.00 |        |
| AK133750 | 13.62624    | 1.08 | 7.9%   |
| AK133793 | 0.00679648  | 0.01 | 137.0% |
| AK133807 | 0.10595812  | 0.04 | 33.8%  |
| AK133808 | 2.157094    | 0.48 | 22.3%  |
| AK133925 | 0.16391     | 0.05 | 29.4%  |
| AK133929 | 0.02859728  | 0.01 | 30.8%  |
| AK133987 | 0.137883    | 0.04 | 26.9%  |
| AK134047 | 0.01070776  | 0.01 | 94.8%  |
| AK134119 | 0           | 0.00 |        |
| AK134158 | 0           | 0.00 |        |
| AK134203 | 0.7859226   | 0.11 | 14.2%  |
| AK134249 | 0.060141032 | 0.05 | 78.1%  |
| AK134270 | 0.06575776  | 0.04 | 54.8%  |
| AK134369 | 0.2140554   | 0.06 | 26.7%  |
| AK134400 | 0.02155398  | 0.03 | 119.9% |
| AK134426 | 0.00497394  | 0.01 | 223.6% |
| AK134490 | 0.04437858  | 0.04 | 81.1%  |
| AK134493 | 0.11961228  | 0.10 | 83.2%  |
| AK134523 | 0.02183604  | 0.01 | 56.8%  |
| AK134610 | 1.0531846   | 0.31 | 29.2%  |
| AK134636 | 8.624988    | 0.35 | 4.0%   |
| AK134637 | 1.401362    | 0.17 | 11.9%  |
| AK134652 | 0           | 0.00 |        |
| AK134673 | 5.087982    | 0.55 | 10.9%  |

|          |             |      |        |
|----------|-------------|------|--------|
| AK134703 | 0.09598214  | 0.03 | 33.1%  |
| AK134715 | 0.2544856   | 0.09 | 35.6%  |
| AK134717 | 0.3203012   | 0.09 | 28.3%  |
| AK134749 | 0.14029316  | 0.03 | 24.1%  |
| AK134755 | 0.12465696  | 0.03 | 24.3%  |
| AK134769 | 5.442438    | 0.27 | 4.9%   |
| AK134789 | 0.2212072   | 0.04 | 17.9%  |
| AK134888 | 0.3426741   | 0.28 | 81.4%  |
| AK134928 | 2.517512    | 0.21 | 8.2%   |
| AK134933 | 0.3720078   | 0.05 | 13.6%  |
| AK134962 | 1.40018     | 0.19 | 13.8%  |
| AK135004 | 0.09820034  | 0.05 | 49.9%  |
| AK135068 | 0.00471928  | 0.01 | 223.6% |
| AK135132 | 2.11998     | 0.30 | 14.3%  |
| AK135254 | 0.293352    | 0.05 | 15.6%  |
| AK135370 | 0.2315733   | 0.38 | 163.6% |
| AK135377 | 0           | 0.00 |        |
| AK135410 | 0.309642    | 0.13 | 40.4%  |
| AK135429 | 0.00512304  | 0.01 | 138.9% |
| AK135471 | 0           | 0.00 |        |
| AK135487 | 2.798134    | 0.37 | 13.1%  |
| AK135548 | 14.49264    | 1.25 | 8.6%   |
| AK135576 | 0.3838798   | 0.17 | 45.2%  |
| AK135599 | 0.35392824  | 0.69 | 193.7% |
| AK135643 | 0.1760834   | 0.05 | 26.7%  |
| AK135671 | 0.00626266  | 0.01 | 140.3% |
| AK135675 | 0           | 0.00 |        |
| AK135688 | 0           | 0.00 |        |
| AK135691 | 0.01854202  | 0.02 | 94.1%  |
| AK135703 | 0           | 0.00 |        |
| AK135708 | 0.0049137   | 0.01 | 137.7% |
| AK135715 | 0.194320143 | 0.31 | 157.6% |
| AK135721 | 1.339828    | 0.19 | 14.2%  |
| AK135726 | 0           | 0.00 |        |
| AK135736 | 0.0051496   | 0.01 | 223.6% |
| AK135737 | 0           | 0.00 |        |
| AK135744 | 0           | 0.00 |        |
| AK135764 | 0           | 0.00 |        |
| AK135766 | 0           | 0.00 |        |
| AK135774 | 0           | 0.00 |        |
| AK135800 | 0           | 0.00 |        |
| AK135804 | 0           | 0.00 |        |
| AK135813 | 0.00869048  | 0.01 | 166.5% |
| AK135830 | 0           | 0.00 |        |
| AK135845 | 0.005537376 | 0.01 | 94.2%  |
| AK135852 | 0.06686338  | 0.03 | 43.0%  |
| AK135878 | 0           | 0.00 |        |

|          |             |      |        |
|----------|-------------|------|--------|
| AK135894 | 0.074861    | 0.02 | 22.9%  |
| AK135904 | 0           | 0.00 |        |
| AK135932 | 0.1307825   | 0.06 | 44.9%  |
| AK135939 | 0           | 0.00 |        |
| AK135960 | 0.00498592  | 0.01 | 223.6% |
| AK135963 | 0.02385728  | 0.02 | 89.6%  |
| AK135973 | 0.00645054  | 0.01 | 138.3% |
| AK135975 | 0           | 0.00 |        |
| AK135986 | 0           | 0.00 |        |
| AK135992 | 0           | 0.00 |        |
| AK135997 | 8.075628    | 0.29 | 3.6%   |
| AK136006 | 0           | 0.00 |        |
| AK136017 | 0           | 0.00 |        |
| AK136021 | 0           | 0.00 |        |
| AK136028 | 0           | 0.00 |        |
| AK136034 | 0           | 0.00 |        |
| AK136039 | 0.00856778  | 0.01 | 140.4% |
| AK136047 | 0           | 0.00 |        |
| AK136065 | 0           | 0.00 |        |
| AK136089 | 0.00640572  | 0.01 | 223.6% |
| AK136114 | 0.00476372  | 0.01 | 223.6% |
| AK136121 | 0           | 0.00 |        |
| AK136126 | 0           | 0.00 |        |
| AK136128 | 0.0127452   | 0.03 | 223.6% |
| AK136146 | 2.610654    | 0.29 | 10.9%  |
| AK136154 | 0.00607122  | 0.01 | 223.6% |
| AK136164 | 0           | 0.00 |        |
| AK136178 | 0           | 0.00 |        |
| AK136239 | 0.00245846  | 0.01 | 223.6% |
| AK136254 | 0.156458    | 0.05 | 31.8%  |
| AK136276 | 0.02543224  | 0.02 | 66.8%  |
| AK136355 | 0.7117154   | 0.17 | 24.1%  |
| AK136391 | 0.033378096 | 0.01 | 42.3%  |
| AK136409 | 0           | 0.00 |        |
| AK136601 | 0.00651428  | 0.01 | 223.6% |
| AK136613 | 0.05258036  | 0.04 | 79.7%  |
| AK136619 | 0.3913406   | 0.08 | 21.4%  |
| AK136630 | 0           | 0.00 |        |
| AK136639 | 0           | 0.00 |        |
| AK136642 | 0           | 0.00 |        |
| AK136654 | 0.11596622  | 0.11 | 91.1%  |
| AK136683 | 0           | 0.00 |        |
| AK136722 | 0.275822    | 0.07 | 26.2%  |
| AK136730 | 0           | 0.00 |        |
| AK136742 | 2.103648    | 0.39 | 18.6%  |
| AK136780 | 0.00808642  | 0.01 | 91.8%  |
| AK136817 | 0.181323    | 0.03 | 19.3%  |

|          |             |      |        |
|----------|-------------|------|--------|
| AK136844 | 22.88094    | 2.12 | 9.3%   |
| AK136846 | 0           | 0.00 |        |
| AK136863 | 0.013845    | 0.02 | 168.1% |
| AK136877 | 0.00396698  | 0.01 | 223.6% |
| AK136882 | 0.14198696  | 0.03 | 21.8%  |
| AK136919 | 0.6656414   | 0.10 | 15.2%  |
| AK136927 | 0.2588548   | 0.05 | 21.1%  |
| AK137010 | 0.1374317   | 0.06 | 41.1%  |
| AK137033 | 0.6668704   | 0.14 | 21.3%  |
| AK137099 | 6.669034    | 1.35 | 20.3%  |
| AK137133 | 0.03915772  | 0.01 | 34.0%  |
| AK137157 | 1.1992222   | 0.28 | 23.2%  |
| AK137190 | 0           | 0.00 |        |
| AK137192 | 0.04363518  | 0.03 | 62.2%  |
| AK137243 | 0           | 0.00 |        |
| AK137251 | 3.165758    | 0.40 | 12.6%  |
| AK137304 | 4.674076    | 0.58 | 12.5%  |
| AK137341 | 0           | 0.00 |        |
| AK137370 | 0.3150924   | 0.07 | 22.7%  |
| AK137397 | 0.5248194   | 0.15 | 28.9%  |
| AK137428 | 0.359758    | 0.04 | 10.9%  |
| AK137448 | 0           | 0.00 |        |
| AK137473 | 0.4206172   | 0.15 | 34.8%  |
| AK137492 | 0.12451624  | 0.03 | 20.9%  |
| AK137525 | 0           | 0.00 |        |
| AK137536 | 0.01672732  | 0.02 | 129.7% |
| AK137548 | 2.79701     | 0.22 | 8.0%   |
| AK137552 | 0.00350814  | 0.01 | 223.6% |
| AK137583 | 1.394152    | 0.19 | 13.7%  |
| AK137696 | 0           | 0.00 |        |
| AK137735 | 0           | 0.00 |        |
| AK137923 | 0.355992    | 0.20 | 56.3%  |
| AK138088 | 0.02898416  | 0.00 | 15.2%  |
| AK138089 | 0           | 0.00 |        |
| AK138135 | 0.077051304 | 0.06 | 77.4%  |
| AK138161 | 0.42435     | 0.09 | 21.9%  |
| AK138201 | 0.02692226  | 0.02 | 57.0%  |
| AK138212 | 0           | 0.00 |        |
| AK138215 | 0.0240795   | 0.03 | 139.2% |
| AK138232 | 0.0165007   | 0.01 | 31.2%  |
| AK138248 | 0.2518528   | 0.08 | 33.7%  |
| AK138253 | 3.284052    | 0.25 | 7.7%   |
| AK138287 | 0.383601    | 0.07 | 17.4%  |
| AK138291 | 0.06663726  | 0.04 | 64.7%  |
| AK138296 | 1.331916    | 0.22 | 16.9%  |
| AK138305 | 0           | 0.00 |        |
| AK138307 | 0.04671514  | 0.02 | 42.3%  |

|          |             |      |        |
|----------|-------------|------|--------|
| AK138323 | 0.03197682  | 0.04 | 126.5% |
| AK138328 | 0.6045982   | 0.19 | 31.5%  |
| AK138343 | 0           | 0.00 |        |
| AK138346 | 0.2155256   | 0.07 | 30.4%  |
| AK138348 | 0.0049667   | 0.01 | 223.6% |
| AK138371 | 0.01197418  | 0.02 | 137.0% |
| AK138376 | 0           | 0.00 |        |
| AK138383 | 1.1075846   | 0.15 | 13.3%  |
| AK138393 | 0.08749168  | 0.02 | 26.1%  |
| AK138412 | 29.00324    | 0.80 | 2.8%   |
| AK138421 | 0.01912832  | 0.02 | 114.0% |
| AK138450 | 0.01117658  | 0.02 | 223.6% |
| AK138451 | 0.04314306  | 0.03 | 59.5%  |
| AK138462 | 0.0075179   | 0.02 | 223.6% |
| AK138476 | 0.2281562   | 0.06 | 26.5%  |
| AK138505 | 0.1579118   | 0.06 | 40.0%  |
| AK138521 | 0.0311506   | 0.02 | 75.5%  |
| AK138522 | 0.63588036  | 0.36 | 56.2%  |
| AK138532 | 3.693338    | 0.70 | 18.9%  |
| AK138554 | 0.0885303   | 0.09 | 106.3% |
| AK138592 | 0.10134774  | 0.04 | 34.5%  |
| AK138624 | 0           | 0.00 |        |
| AK138658 | 0.08346698  | 0.02 | 27.5%  |
| AK138660 | 0           | 0.00 |        |
| AK138667 | 0.0175497   | 0.01 | 58.0%  |
| AK138691 | 0           | 0.00 |        |
| AK138755 | 0.132549    | 0.07 | 55.7%  |
| AK138756 | 0.4249996   | 0.16 | 38.3%  |
| AK138781 | 0.4399898   | 0.16 | 35.7%  |
| AK138792 | 0           | 0.00 |        |
| AK138811 | 0           | 0.00 |        |
| AK138842 | 0           | 0.00 |        |
| AK138849 | 0.003648602 | 0.01 | 140.7% |
| AK138853 | 0           | 0.00 |        |
| AK138907 | 0.16077148  | 0.09 | 59.1%  |
| AK138915 | 0.4845368   | 0.04 | 7.8%   |
| AK138921 | 0.00216408  | 0.00 | 223.6% |
| AK138941 | 0           | 0.00 |        |
| AK138949 | 47.26384    | 2.17 | 4.6%   |
| AK139027 | 0.0191969   | 0.01 | 58.0%  |
| AK139053 | 0.285548    | 0.17 | 59.3%  |
| AK139063 | 0.0149747   | 0.02 | 138.9% |
| AK139070 | 0.416628    | 0.06 | 14.6%  |
| AK139076 | 0.7902728   | 0.20 | 25.1%  |
| AK139092 | 0.010760104 | 0.01 | 134.3% |
| AK139109 | 0.9341194   | 0.23 | 25.0%  |
| AK139149 | 0           | 0.00 |        |

|          |             |      |        |
|----------|-------------|------|--------|
| AK139182 | 24.35908    | 1.71 | 7.0%   |
| AK139229 | 0.08170548  | 0.04 | 43.9%  |
| AK139280 | 0.44072974  | 0.57 | 129.2% |
| AK139295 | 1.433116    | 0.12 | 8.6%   |
| AK139319 | 3.673398    | 0.57 | 15.6%  |
| AK139359 | 0.03995826  | 0.03 | 75.5%  |
| AK139424 | 0.13760824  | 0.06 | 45.9%  |
| AK139461 | 0.3415238   | 0.10 | 28.3%  |
| AK139481 | 2.940252    | 0.25 | 8.6%   |
| AK139483 | 1.0166586   | 0.05 | 4.4%   |
| AK139487 | 0           | 0.00 |        |
| AK139502 | 0           | 0.00 |        |
| AK139503 | 0.00622964  | 0.01 | 223.6% |
| AK139522 | 0           | 0.00 |        |
| AK139523 | 0.8514796   | 0.14 | 15.9%  |
| AK139528 | 0           | 0.00 |        |
| AK139544 | 0           | 0.00 |        |
| AK139551 | 0           | 0.00 |        |
| AK139560 | 0           | 0.00 |        |
| AK139587 | 0.09478792  | 0.07 | 72.7%  |
| AK139591 | 0           | 0.00 |        |
| AK139607 | 0           | 0.00 |        |
| AK139611 | 0.0712794   | 0.03 | 46.7%  |
| AK139614 | 0.007497    | 0.01 | 138.1% |
| AK139634 | 0.2196914   | 0.04 | 19.4%  |
| AK139678 | 0.008233    | 0.02 | 223.6% |
| AK139687 | 0.00841454  | 0.01 | 137.0% |
| AK139698 | 0.00967696  | 0.01 | 153.1% |
| AK139701 | 0.009879992 | 0.01 | 105.1% |
| AK139730 | 0.003365284 | 0.00 | 121.8% |
| AK139752 | 0           | 0.00 |        |
| AK139772 | 0           | 0.00 |        |
| AK139774 | 0.00680342  | 0.02 | 223.6% |
| AK139799 | 0.08284182  | 0.02 | 23.1%  |
| AK139806 | 0           | 0.00 |        |
| AK139810 | 0.00745244  | 0.01 | 92.9%  |
| AK139822 | 0.009493832 | 0.01 | 114.1% |
| AK139842 | 0.0145757   | 0.02 | 137.7% |
| AK139864 | 0           | 0.00 |        |
| AK139882 | 0           | 0.00 |        |
| AK139889 | 0.01623084  | 0.04 | 223.6% |
| AK139890 | 0.00483004  | 0.01 | 223.6% |
| AK139997 | 0.4725456   | 0.09 | 19.5%  |
| AK139999 | 1.3812516   | 0.66 | 47.8%  |
| AK140017 | 0           | 0.00 |        |
| AK140049 | 0.02496538  | 0.02 | 92.4%  |
| AK140072 | 0.5543398   | 0.09 | 17.0%  |

|          |             |        |        |
|----------|-------------|--------|--------|
| AK140089 | 0.1154485   | 0.03   | 27.1%  |
| AK140090 | 0.2126274   | 0.04   | 16.7%  |
| AK140147 | 0.04831806  | 0.02   | 46.8%  |
| AK140161 | 0.00866534  | 0.01   | 140.4% |
| AK140178 | 0.4558954   | 0.06   | 12.5%  |
| AK140186 | 36.35238    | 1.57   | 4.3%   |
| AK140192 | 0.2328094   | 0.05   | 22.2%  |
| AK140218 | 2.029774    | 0.37   | 18.2%  |
| AK140221 | 1.56488     | 0.21   | 13.7%  |
| AK140224 | 7.835494    | 0.49   | 6.3%   |
| AK140234 | 0.1499198   | 0.03   | 20.5%  |
| AK140238 | 0.0685016   | 0.03   | 38.5%  |
| AK140265 | 1064.1324   | 164.35 | 15.4%  |
| AK140288 | 1.863114    | 0.11   | 6.0%   |
| AK140292 | 0.032854454 | 0.02   | 73.3%  |
| AK140336 | 0.5072128   | 0.05   | 9.3%   |
| AK140363 | 0.007954    | 0.01   | 138.9% |
| AK140370 | 2.102494    | 0.69   | 32.9%  |
| AK140384 | 0.433269    | 0.10   | 23.6%  |
| AK140390 | 0.7602158   | 0.11   | 14.8%  |
| AK140437 | 0.20106254  | 0.07   | 33.1%  |
| AK140446 | 2.238282    | 0.31   | 14.0%  |
| AK140479 | 0.03958446  | 0.03   | 66.5%  |
| AK140520 | 0.07187218  | 0.03   | 47.9%  |
| AK140543 | 0.17707464  | 0.09   | 49.9%  |
| AK140547 | 12.51586    | 1.13   | 9.1%   |
| AK140580 | 0.02607344  | 0.02   | 80.6%  |
| AK140583 | 0.00271224  | 0.01   | 223.6% |
| AK140632 | 1.961768    | 0.13   | 6.6%   |
| AK140725 | 5.232246    | 0.77   | 14.7%  |
| AK140772 | 0.2521668   | 0.05   | 19.9%  |
| AK140896 | 0.01714204  | 0.02   | 104.6% |
| AK140919 | 0.06269588  | 0.03   | 48.7%  |
| AK141015 | 0           | 0.00   |        |
| AK141151 | 0.00179353  | 0.00   | 223.6% |
| AK141187 | 0.013160016 | 0.01   | 80.8%  |
| AK141205 | 0.10810154  | 0.04   | 38.6%  |
| AK141227 | 1.0943606   | 0.25   | 23.2%  |
| AK141238 | 1.719264    | 0.25   | 14.3%  |
| AK141303 | 0.12187406  | 0.07   | 59.0%  |
| AK141396 | 0           | 0.00   |        |
| AK141402 | 17.8335     | 1.74   | 9.8%   |
| AK141411 | 1.520994    | 0.26   | 17.3%  |
| AK141527 | 0.2166072   | 0.06   | 28.2%  |
| AK141540 | 0.013964    | 0.01   | 68.0%  |
| AK141565 | 0.09336402  | 0.04   | 46.4%  |
| AK141570 | 8.896188    | 0.51   | 5.7%   |



|          |            |      |        |
|----------|------------|------|--------|
| AK141588 | 3.629022   | 0.49 | 13.6%  |
| AK141638 | 1.44179    | 0.15 | 10.6%  |
| AK141659 | 0.2377488  | 0.06 | 23.1%  |
| AK141725 | 0.1560602  | 0.01 | 9.0%   |
| AK141748 | 0          | 0.00 |        |
| AK141842 | 11.91354   | 0.98 | 8.2%   |
| AK141900 | 0.07562304 | 0.05 | 71.5%  |
| AK141935 | 0.3476802  | 0.13 | 38.6%  |
| AK142001 | 0.051302   | 0.02 | 43.1%  |
| AK142028 | 0.5034444  | 0.21 | 41.0%  |
| AK142058 | 0.05425074 | 0.04 | 72.2%  |
| AK142074 | 0          | 0.00 |        |
| AK142089 | 0.18613186 | 0.09 | 50.8%  |
| AK142161 | 0.1919824  | 0.11 | 55.0%  |
| AK142198 | 0.809443   | 0.15 | 18.6%  |
| AK142214 | 0.344965   | 0.10 | 28.5%  |
| AK142244 | 1.1089322  | 0.20 | 17.6%  |
| AK142254 | 0.08657142 | 0.05 | 61.4%  |
| AK142359 | 0.15369614 | 0.04 | 25.3%  |
| AK142386 | 1.0383062  | 0.18 | 17.6%  |
| AK142406 | 0.00473336 | 0.01 | 138.2% |
| AK142431 | 1.82661    | 4.08 | 223.6% |
| AK142440 | 2.764528   | 0.26 | 9.3%   |
| AK142467 | 0.0398532  | 0.02 | 62.0%  |
| AK142524 | 0.00303728 | 0.01 | 223.6% |
| AK142593 | 1.0673668  | 0.20 | 18.6%  |
| AK142602 | 0          | 0.00 |        |
| AK142614 | 0.02642772 | 0.02 | 81.0%  |
| AK142627 | 0          | 0.00 |        |
| AK142664 | 0          | 0.00 |        |
| AK142678 | 0          | 0.00 |        |
| AK142681 | 0.9296148  | 0.07 | 7.2%   |
| AK142847 | 0.0162049  | 0.04 | 223.6% |
| AK142879 | 0.2363736  | 0.03 | 14.3%  |
| AK142892 | 0.10517748 | 0.05 | 44.0%  |
| AK142949 | 0          | 0.00 |        |
| AK142977 | 0.00583532 | 0.01 | 137.8% |
| AK142978 | 0.13699954 | 0.09 | 63.1%  |
| AK142999 | 0.1690424  | 0.20 | 118.6% |
| AK143097 | 0.3535722  | 0.04 | 12.5%  |
| AK143102 | 0          | 0.00 |        |
| AK143160 | 0          | 0.00 |        |
| AK143195 | 0          | 0.00 |        |
| AK143234 | 3.50042    | 0.41 | 11.7%  |
| AK143260 | 0.0914017  | 0.04 | 44.5%  |
| AK143305 | 0.00453668 | 0.01 | 223.6% |
| AK143407 | 15.21126   | 0.76 | 5.0%   |

|          |             |      |        |
|----------|-------------|------|--------|
| AK143417 | 0.559435    | 0.51 | 90.7%  |
| AK143610 | 4.09012     | 0.62 | 15.3%  |
| AK143758 | 0           | 0.00 |        |
| AK143760 | 0           | 0.00 |        |
| AK143784 | 0.03723966  | 0.01 | 19.8%  |
| AK143789 | 0           | 0.00 |        |
| AK143813 | 0           | 0.00 |        |
| AK143833 | 0           | 0.00 |        |
| AK143856 | 0.00449108  | 0.01 | 137.0% |
| AK143902 | 0.01819046  | 0.00 | 25.6%  |
| AK143924 | 0           | 0.00 |        |
| AK143926 | 0.3302612   | 0.18 | 54.7%  |
| AK143933 | 0           | 0.00 |        |
| AK143934 | 0           | 0.00 |        |
| AK143952 | 0           | 0.00 |        |
| AK143957 | 0.0605165   | 0.05 | 85.0%  |
| AK143961 | 0           | 0.00 |        |
| AK143968 | 0.07071028  | 0.02 | 23.1%  |
| AK143982 | 0.34099646  | 0.26 | 75.6%  |
| AK144055 | 0           | 0.00 |        |
| AK144087 | 0           | 0.00 |        |
| AK144104 | 0           | 0.00 |        |
| AK144120 | 0.00821508  | 0.02 | 223.6% |
| AK144143 | 0.01782498  | 0.02 | 103.9% |
| AK144172 | 0.00963206  | 0.02 | 223.6% |
| AK144265 | 31.81212    | 9.13 | 28.7%  |
| AK144266 | 0.02814174  | 0.03 | 103.7% |
| AK144267 | 0.19644548  | 0.10 | 52.2%  |
| AK144274 | 0.00591886  | 0.01 | 223.6% |
| AK144295 | 0.0778465   | 0.04 | 57.0%  |
| AK144297 | 0.03699032  | 0.05 | 138.7% |
| AK144299 | 0.07657285  | 0.05 | 61.6%  |
| AK144317 | 0.8516628   | 0.06 | 7.1%   |
| AK144329 | 0           | 0.00 |        |
| AK144330 | 0.0336784   | 0.03 | 102.0% |
| AK144366 | 0           | 0.00 |        |
| AK144367 | 0.6774776   | 0.16 | 23.8%  |
| AK144388 | 0           | 0.00 |        |
| AK144462 | 0           | 0.00 |        |
| AK144477 | 0.01197246  | 0.03 | 223.6% |
| AK144485 | 0.5491064   | 0.11 | 20.2%  |
| AK144536 | 13.50954    | 1.13 | 8.4%   |
| AK144545 | 0.193104    | 0.05 | 28.0%  |
| AK144563 | 0.004544142 | 0.01 | 140.5% |
| AK144571 | 0           | 0.00 |        |
| AK144589 | 0.3550638   | 0.05 | 14.3%  |
| AK144610 | 0.0354212   | 0.03 | 97.3%  |

|          |             |      |        |
|----------|-------------|------|--------|
| AK144617 | 0.00489754  | 0.01 | 223.6% |
| AK144626 | 0           | 0.00 |        |
| AK144632 | 0.01635298  | 0.02 | 93.0%  |
| AK144662 | 0.3500366   | 0.16 | 45.4%  |
| AK144664 | 0.4482002   | 0.14 | 30.8%  |
| AK144695 | 0.07831892  | 0.04 | 45.5%  |
| AK144724 | 0.00447832  | 0.01 | 223.6% |
| AK144747 | 0.00309056  | 0.01 | 223.6% |
| AK144771 | 0.189731    | 0.05 | 27.6%  |
| AK144776 | 0           | 0.00 |        |
| AK144798 | 0           | 0.00 |        |
| AK144811 | 0.08791628  | 0.05 | 53.4%  |
| AK144823 | 0.00234904  | 0.01 | 223.6% |
| AK144829 | 0.01330294  | 0.02 | 114.0% |
| AK144834 | 0           | 0.00 |        |
| AK144843 | 0           | 0.00 |        |
| AK144852 | 0.0075017   | 0.01 | 138.9% |
| AK144859 | 0.4213264   | 0.23 | 55.0%  |
| AK144862 | 0           | 0.00 |        |
| AK144867 | 3.68875     | 0.69 | 18.6%  |
| AK144870 | 0.1929012   | 0.09 | 46.4%  |
| AK144882 | 0           | 0.00 |        |
| AK144886 | 0.00767532  | 0.02 | 223.6% |
| AK144897 | 0.09069354  | 0.06 | 69.9%  |
| AK144909 | 0.5179844   | 0.19 | 37.3%  |
| AK144910 | 0           | 0.00 |        |
| AK144912 | 0           | 0.00 |        |
| AK144923 | 0.04951848  | 0.01 | 29.2%  |
| AK144927 | 0.003323448 | 0.00 | 142.7% |
| AK144984 | 0           | 0.00 |        |
| AK145079 | 0.8903326   | 0.07 | 7.4%   |
| AK145081 | 0.00475954  | 0.01 | 223.6% |
| AK145095 | 1.0227894   | 0.39 | 38.1%  |
| AK145113 | 0.02005358  | 0.04 | 179.8% |
| AK145129 | 0           | 0.00 |        |
| AK145139 | 0           | 0.00 |        |
| AK145144 | 0.0061821   | 0.01 | 223.6% |
| AK145161 | 0.07568382  | 0.04 | 53.4%  |
| AK145172 | 0           | 0.00 |        |
| AK145180 | 0.236718    | 0.11 | 48.1%  |
| AK145215 | 0           | 0.00 |        |
| AK145218 | 0           | 0.00 |        |
| AK145231 | 0.0991894   | 0.03 | 26.4%  |
| AK145253 | 0.00467124  | 0.01 | 223.6% |
| AK145276 | 0.034382    | 0.02 | 47.5%  |
| AK145301 | 0.11473762  | 0.09 | 81.7%  |
| AK145303 | 0.00808254  | 0.02 | 223.6% |

|          |            |      |        |
|----------|------------|------|--------|
| AK145307 | 0          | 0.00 |        |
| AK145310 | 0.02606284 | 0.04 | 137.1% |
| AK145334 | 0.00280774 | 0.01 | 223.6% |
| AK145340 | 0          | 0.00 |        |
| AK145347 | 0          | 0.00 |        |
| AK145360 | 0          | 0.00 |        |
| AK145370 | 0          | 0.00 |        |
| AK145393 | 2.341498   | 0.33 | 14.1%  |
| AK145395 | 0.04054432 | 0.03 | 78.3%  |
| AK145396 | 0.4605618  | 0.21 | 45.7%  |
| AK145430 | 0.3186818  | 0.16 | 50.9%  |
| AK145433 | 0          | 0.00 |        |
| AK145464 | 0.0196454  | 0.01 | 50.0%  |
| AK145481 | 0          | 0.00 |        |
| AK145489 | 0.4985758  | 0.11 | 23.0%  |
| AK145533 | 0.01959044 | 0.02 | 92.4%  |
| AK145544 | 0          | 0.00 |        |
| AK145597 | 0          | 0.00 |        |
| AK145614 | 0.0375663  | 0.02 | 45.6%  |
| AK145828 | 0.00945838 | 0.02 | 223.6% |
| AK146012 | 2.94744    | 0.82 | 27.8%  |
| AK146025 | 0          | 0.00 |        |
| AK146139 | 0          | 0.00 |        |
| AK146146 | 0.01701978 | 0.04 | 223.6% |
| AK146150 | 0          | 0.00 |        |
| AK146156 | 0.07794604 | 0.05 | 58.7%  |
| AK146160 | 0.01691766 | 0.02 | 139.3% |
| AK146183 | 0          | 0.00 |        |
| AK146213 | 0          | 0.00 |        |
| AK146230 | 0.12338314 | 0.04 | 31.4%  |
| AK146255 | 0          | 0.00 |        |
| AK146381 | 0.0056161  | 0.01 | 138.2% |
| AK146386 | 0          | 0.00 |        |
| AK146407 | 0.10428582 | 0.07 | 70.0%  |
| AK146690 | 0.12679602 | 0.04 | 32.9%  |
| AK146694 | 0.00799646 | 0.01 | 161.4% |
| AK146748 | 0          | 0.00 |        |
| AK146861 | 0          | 0.00 |        |
| AK146888 | 0          | 0.00 |        |
| AK146937 | 0.00912154 | 0.01 | 138.2% |
| AK146979 | 0          | 0.00 |        |
| AK147021 | 0.03078422 | 0.03 | 93.8%  |
| AK147070 | 0          | 0.00 |        |
| AK147071 | 0          | 0.00 |        |
| AK147079 | 0          | 0.00 |        |
| AK147121 | 1.959038   | 0.10 | 5.3%   |
| AK147193 | 0.02460046 | 0.04 | 172.7% |

|          |             |      |        |
|----------|-------------|------|--------|
| AK147443 | 0.06286062  | 0.02 | 34.0%  |
| AK147532 | 4.847846    | 0.08 | 1.6%   |
| AK147796 | 1.612256    | 0.15 | 9.5%   |
| AK147860 | 0.771305    | 0.07 | 9.7%   |
| AK147911 | 6.947314    | 0.26 | 3.8%   |
| AK147993 | 2.049536    | 0.13 | 6.5%   |
| AK148045 | 0.1030984   | 0.23 | 223.6% |
| AK148054 | 5.2969      | 0.84 | 15.8%  |
| AK148126 | 1.402502    | 0.27 | 19.1%  |
| AK148130 | 0           | 0.00 |        |
| AK148198 | 0.00386798  | 0.01 | 223.6% |
| AK148282 | 0.594789    | 0.13 | 21.0%  |
| AK148294 | 2.363528    | 0.53 | 22.6%  |
| AK148297 | 0.03568158  | 0.01 | 16.1%  |
| AK148313 | 0.13735554  | 0.05 | 34.0%  |
| AK148321 | 0.02719186  | 0.02 | 83.0%  |
| AK148373 | 0.1886637   | 0.09 | 49.6%  |
| AK148391 | 0.1499251   | 0.12 | 79.8%  |
| AK148393 | 0           | 0.00 |        |
| AK148461 | 3.971266    | 0.39 | 9.9%   |
| AK148766 | 0.342007    | 0.13 | 38.7%  |
| AK148800 | 0.06718016  | 0.04 | 60.5%  |
| AK149000 | 0.0459672   | 0.01 | 32.3%  |
| AK149094 | 9.12799     | 1.52 | 16.7%  |
| AK149188 | 0.1959322   | 0.04 | 21.4%  |
| AK149205 | 0.2604842   | 0.09 | 35.0%  |
| AK149240 | 0.06870706  | 0.03 | 49.6%  |
| AK149260 | 0.00254644  | 0.01 | 223.6% |
| AK149295 | 0.3495134   | 0.08 | 22.0%  |
| AK149307 | 0.6271056   | 0.09 | 14.9%  |
| AK149321 | 0.01504008  | 0.01 | 68.8%  |
| AK149394 | 0           | 0.00 |        |
| AK149453 | 0.03905352  | 0.03 | 67.8%  |
| AK149454 | 0           | 0.00 |        |
| AK149509 | 0           | 0.00 |        |
| AK149537 | 0.00288162  | 0.01 | 223.6% |
| AK149842 | 0.0488658   | 0.02 | 50.0%  |
| AK149987 | 0.7414604   | 0.21 | 28.5%  |
| AK150110 | 0.2687686   | 0.06 | 23.2%  |
| AK150172 | 0.14176662  | 0.08 | 54.5%  |
| AK150199 | 0.051673794 | 0.03 | 58.6%  |
| AK150559 | 7.37185     | 0.73 | 9.8%   |
| AK151508 | 0.5859458   | 0.06 | 11.0%  |
| AK151523 | 0           | 0.00 |        |
| AK151815 | 0.005269951 | 0.01 | 193.1% |
| AK152002 | 10.023136   | 1.08 | 10.8%  |
| AK152097 | 11.30854    | 0.53 | 4.7%   |

|          |             |      |        |
|----------|-------------|------|--------|
| AK152437 | 0.2215848   | 0.08 | 34.6%  |
| AK153014 | 0.07562428  | 0.03 | 41.6%  |
| AK153180 | 0           | 0.00 |        |
| AK153212 | 0           | 0.00 |        |
| AK153351 | 0           | 0.00 |        |
| AK153427 | 0.03042238  | 0.01 | 35.5%  |
| AK153491 | 0.02233296  | 0.03 | 137.0% |
| AK153503 | 1.87915     | 0.31 | 16.8%  |
| AK153534 | 0.01851716  | 0.01 | 50.5%  |
| AK153575 | 0.14269934  | 0.10 | 71.5%  |
| AK153584 | 0           | 0.00 |        |
| AK153590 | 0.0390698   | 0.01 | 33.3%  |
| AK153639 | 0.00419124  | 0.01 | 223.6% |
| AK153786 | 0           | 0.00 |        |
| AK153821 | 0.12635582  | 0.05 | 38.1%  |
| AK153828 | 0           | 0.00 |        |
| AK153849 | 5.497806    | 0.35 | 6.3%   |
| AK153988 | 0.1274023   | 0.04 | 30.8%  |
| AK154034 | 0.2070848   | 0.16 | 75.9%  |
| AK154077 | 0.4826628   | 0.19 | 39.7%  |
| AK154113 | 0.5647518   | 0.11 | 19.5%  |
| AK154177 | 0.10062932  | 0.01 | 12.8%  |
| AK154184 | 0           | 0.00 |        |
| AK154190 | 0.336446    | 0.10 | 30.8%  |
| AK154211 | 0.1116478   | 0.09 | 84.8%  |
| AK154225 | 1.541062    | 0.08 | 4.9%   |
| AK154275 | 0.3070704   | 0.03 | 10.1%  |
| AK154380 | 3.008374    | 0.24 | 8.1%   |
| AK154406 | 0.03996038  | 0.04 | 91.0%  |
| AK154427 | 0.51398     | 0.12 | 23.0%  |
| AK154515 | 0.004000716 | 0.01 | 143.5% |
| AK154552 | 0.001323588 | 0.00 | 223.6% |
| AK154587 | 0.00807118  | 0.02 | 223.6% |
| AK154631 | 0           | 0.00 |        |
| AK154635 | 0           | 0.00 |        |
| AK154735 | 0           | 0.00 |        |
| AK154977 | 0.009665494 | 0.01 | 83.2%  |
| AK154990 | 0.009904616 | 0.01 | 74.7%  |
| AK155068 | 0           | 0.00 |        |
| AK155141 | 33.9895     | 1.18 | 3.5%   |
| AK155149 | 0.0305367   | 0.02 | 75.8%  |
| AK155169 | 0           | 0.00 |        |
| AK155239 | 2.856016    | 0.15 | 5.4%   |
| AK155472 | 0.5178754   | 0.27 | 52.3%  |
| AK155489 | 0.00964542  | 0.02 | 223.6% |
| AK155516 | 0           | 0.00 |        |
| AK155560 | 0.0036118   | 0.01 | 223.6% |

|          |             |       |        |
|----------|-------------|-------|--------|
| AK155592 | 0.2571632   | 0.06  | 23.8%  |
| AK155734 | 0.001964928 | 0.00  | 223.6% |
| AK155839 | 0.01247904  | 0.02  | 145.7% |
| AK155877 | 0           | 0.00  |        |
| AK156148 | 0           | 0.00  |        |
| AK156292 | 0           | 0.00  |        |
| AK156308 | 0.00231356  | 0.01  | 223.6% |
| AK156427 | 0.02065578  | 0.01  | 64.9%  |
| AK156452 | 0.00317256  | 0.01  | 223.6% |
| AK156477 | 1.0428424   | 0.14  | 13.7%  |
| AK156636 | 0.5979292   | 0.12  | 20.4%  |
| AK156678 | 0           | 0.00  |        |
| AK156750 | 0.3329254   | 0.11  | 33.8%  |
| AK156771 | 0.04434958  | 0.01  | 24.4%  |
| AK156842 | 1.767142    | 0.17  | 9.4%   |
| AK156859 | 0           | 0.00  |        |
| AK156902 | 0           | 0.00  |        |
| AK156967 | 0           | 0.00  |        |
| AK156980 | 0           | 0.00  |        |
| AK157178 | 46.22424    | 10.19 | 22.0%  |
| AK157216 | 0           | 0.00  |        |
| AK157218 | 0.007191696 | 0.01  | 121.5% |
| AK157237 | 0.17404608  | 0.16  | 89.9%  |
| AK157435 | 0.06674662  | 0.03  | 47.2%  |
| AK157456 | 0.00924204  | 0.01  | 137.0% |
| AK157499 | 5.393056    | 0.80  | 14.8%  |
| AK157519 | 0.6269654   | 0.10  | 15.8%  |
| AK157531 | 0           | 0.00  |        |
| AK157632 | 0           | 0.00  |        |
| AK157659 | 0.2311694   | 0.07  | 31.5%  |
| AK157788 | 0.1706584   | 0.04  | 21.7%  |
| AK157795 | 0.6400372   | 0.12  | 18.7%  |
| AK157878 | 0.200532    | 0.05  | 23.4%  |
| AK157887 | 1.1655316   | 0.14  | 12.2%  |
| AK157916 | 0.02038404  | 0.02  | 80.9%  |
| AK157941 | 0.009399542 | 0.01  | 97.8%  |
| AK157947 | 0.09411882  | 0.04  | 40.3%  |
| AK157963 | 20.4631     | 2.15  | 10.5%  |
| AK157980 | 0.00533268  | 0.01  | 223.6% |
| AK158018 | 0.003798    | 0.01  | 223.6% |
| AK158030 | 17.59938    | 0.93  | 5.3%   |
| AK158034 | 0.009223326 | 0.01  | 68.2%  |
| AK158055 | 0.23847     | 0.14  | 58.3%  |
| AK158109 | 0.170837648 | 0.25  | 146.5% |
| AK158152 | 0.0215439   | 0.00  | 18.6%  |
| AK158157 | 0.00348014  | 0.01  | 223.6% |
| AK158189 | 0.3963292   | 0.12  | 31.4%  |

|          |             |      |        |
|----------|-------------|------|--------|
| AK158196 | 0.00787781  | 0.01 | 112.4% |
| AK158233 | 0           | 0.00 |        |
| AK158239 | 0           | 0.00 |        |
| AK158244 | 0.194549635 | 0.20 | 100.6% |
| AK158291 | 0.01799452  | 0.02 | 117.9% |
| AK158295 | 0.0075474   | 0.02 | 223.6% |
| AK158300 | 21.6709     | 3.35 | 15.5%  |
| AK158379 | 0.4354582   | 0.09 | 21.7%  |
| AK158414 | 0.866335    | 0.17 | 19.1%  |
| AK158434 | 0.07116026  | 0.04 | 58.7%  |
| AK158473 | 0.00677372  | 0.00 | 59.3%  |
| AK158482 | 0.019908598 | 0.01 | 72.6%  |
| AK158612 | 0.00504096  | 0.01 | 137.0% |
| AK158619 | 1.63803     | 0.27 | 16.3%  |
| AK158658 | 0.00583862  | 0.01 | 223.6% |
| AK158669 | 0.9537566   | 0.42 | 43.9%  |
| AK158810 | 0           | 0.00 |        |
| AK158854 | 0.288044    | 0.05 | 16.6%  |
| AK158926 | 0.1265236   | 0.03 | 22.4%  |
| AK158929 | 0.14855546  | 0.06 | 41.9%  |
| AK158974 | 0           | 0.00 |        |
| AK159003 | 0.04753326  | 0.01 | 25.9%  |
| AK159010 | 0           | 0.00 |        |
| AK159017 | 0.04614294  | 0.04 | 79.5%  |
| AK159035 | 0.01321462  | 0.02 | 148.0% |
| AK160141 | 0.2535274   | 0.09 | 36.5%  |
| AK160158 | 0           | 0.00 |        |
| AK160260 | 0           | 0.00 |        |
| AK160359 | 0.12064126  | 0.06 | 48.9%  |
| AK160408 | 0.3740706   | 0.16 | 44.0%  |
| AK160416 | 0           | 0.00 |        |
| AK160425 | 0           | 0.00 |        |
| AK160437 | 0           | 0.00 |        |
| AK160502 | 0.3197036   | 0.08 | 23.7%  |
| AK160548 | 2.601732    | 0.55 | 21.2%  |
| AK160668 | 2.782768    | 0.35 | 12.6%  |
| AK160711 | 1.314262    | 0.08 | 6.4%   |
| AK160850 | 0.3762666   | 0.09 | 23.1%  |
| AK160921 | 0.1986468   | 0.04 | 19.1%  |
| AK160964 | 0.00855969  | 0.01 | 90.2%  |
| AK161046 | 0.06209914  | 0.02 | 25.2%  |
| AK161073 | 0.1803654   | 0.06 | 34.0%  |
| AK161079 | 0.0238208   | 0.01 | 51.0%  |
| AK161191 | 0           | 0.00 |        |
| AK161337 | 0.077941    | 0.12 | 150.7% |
| AK161354 | 0.00821234  | 0.02 | 223.6% |
| AK161361 | 0.28800228  | 0.13 | 44.8%  |



|          |             |      |        |
|----------|-------------|------|--------|
| AK161362 | 0.00546956  | 0.01 | 138.3% |
| AK161363 | 20.94428    | 1.15 | 5.5%   |
| AK161373 | 0           | 0.00 |        |
| AK161402 | 0           | 0.00 |        |
| AK161406 | 0.03573934  | 0.01 | 35.6%  |
| AK161423 | 5.617354    | 0.38 | 6.7%   |
| AK161424 | 2.699486    | 0.25 | 9.4%   |
| AK161431 | 0.001589104 | 0.00 | 223.6% |
| AK161459 | 0.15781816  | 0.05 | 33.9%  |
| AK161463 | 0.03800584  | 0.02 | 60.2%  |
| AK161480 | 0.00373598  | 0.01 | 223.6% |
| AK161481 | 0.105243098 | 0.14 | 132.8% |
| AK161589 | 0           | 0.00 |        |
| AK161590 | 0.2396572   | 0.19 | 78.4%  |
| AK161599 | 0.8704206   | 0.53 | 60.7%  |
| AK161639 | 0.03992308  | 0.05 | 115.5% |
| AK161717 | 0.017304866 | 0.01 | 32.1%  |
| AK161769 | 1.0742732   | 0.12 | 11.0%  |
| AK161843 | 7.302128    | 0.63 | 8.7%   |
| AK161845 | 0.014032496 | 0.02 | 115.5% |
| AK161900 | 1.0425752   | 0.18 | 16.9%  |
| AK161948 | 0.02585694  | 0.01 | 43.8%  |
| AK162010 | 0.1509546   | 0.02 | 13.7%  |
| AK162043 | 1.584374    | 0.39 | 24.6%  |
| AK162063 | 0.05172588  | 0.03 | 50.2%  |
| AK162128 | 4.225332    | 0.42 | 10.0%  |
| AK162138 | 0.6897716   | 0.11 | 15.8%  |
| AK162140 | 0           | 0.00 |        |
| AK162351 | 0.258675    | 0.03 | 12.3%  |
| AK162363 | 0.1710208   | 0.06 | 32.8%  |
| AK162386 | 0.3253838   | 0.05 | 14.6%  |
| AK162388 | 0           | 0.00 |        |
| AK162519 | 0.11347208  | 0.03 | 27.8%  |
| AK162599 | 0.0068384   | 0.02 | 223.6% |
| AK162636 | 0.3130469   | 0.26 | 83.5%  |
| AK162666 | 0           | 0.00 |        |
| AK162670 | 4.321318    | 0.29 | 6.7%   |
| AK162774 | 0.00283996  | 0.01 | 223.6% |
| AK162806 | 0.0648187   | 0.04 | 57.9%  |
| AK162833 | 0           | 0.00 |        |
| AK162870 | 0.380984    | 0.03 | 7.0%   |
| AK162906 | 0.501005204 | 0.38 | 76.3%  |
| AK162911 | 0.07700832  | 0.02 | 21.2%  |
| AK162916 | 0.02841702  | 0.01 | 30.1%  |
| AK162930 | 0.4095164   | 0.15 | 36.5%  |
| AK162942 | 0.2765052   | 0.08 | 29.5%  |
| AK162963 | 0.0153835   | 0.03 | 223.6% |

|          |             |        |        |
|----------|-------------|--------|--------|
| AK162965 | 0.2078448   | 0.05   | 25.4%  |
| AK163002 | 0           | 0.00   |        |
| AK163016 | 0.17863     | 0.03   | 14.4%  |
| AK163020 | 0.08399108  | 0.02   | 23.0%  |
| AK163054 | 0.005186894 | 0.01   | 221.7% |
| AK163067 | 0.208481    | 0.05   | 22.1%  |
| AK163075 | 0.05682784  | 0.03   | 58.0%  |
| AK163095 | 11.19368    | 0.61   | 5.4%   |
| AK163097 | 0.1695572   | 0.01   | 7.6%   |
| AK163099 | 0.8754556   | 0.23   | 26.3%  |
| AK163103 | 0.00934678  | 0.02   | 223.6% |
| AK163121 | 9.85859     | 0.82   | 8.3%   |
| AK163132 | 0.2974662   | 0.10   | 34.6%  |
| AK163149 | 2.859846    | 0.31   | 10.8%  |
| AK163151 | 0.00594814  | 0.01   | 223.6% |
| AK163160 | 0.21300194  | 0.07   | 32.1%  |
| AK163166 | 0.16491218  | 0.08   | 48.3%  |
| AK163212 | 0           | 0.00   |        |
| AK163252 | 0.2104158   | 0.10   | 48.2%  |
| AK163289 | 0.001783478 | 0.00   | 223.6% |
| AK163292 | 0.0134429   | 0.03   | 223.6% |
| AK163309 | 0           | 0.00   |        |
| AK163331 | 0           | 0.00   |        |
| AK163333 | 0           | 0.00   |        |
| AK163421 | 0.607183    | 0.11   | 18.3%  |
| AK163429 | 3.839576    | 0.49   | 12.7%  |
| AK163433 | 6.130286    | 0.54   | 8.8%   |
| AK163440 | 2988.508    | 381.52 | 12.8%  |
| AK163447 | 0.13160114  | 0.05   | 41.0%  |
| AK163460 | 0.2512694   | 0.11   | 42.7%  |
| AK163475 | 5.26098     | 0.58   | 11.1%  |
| AK163488 | 4.089752    | 0.74   | 18.0%  |
| AK163556 | 1.958908    | 0.07   | 3.7%   |
| AK163572 | 0.3100624   | 0.05   | 17.1%  |
| AK163592 | 2.347642    | 0.37   | 15.7%  |
| AK163667 | 0.05132756  | 0.07   | 134.8% |
| AK163681 | 0           | 0.00   |        |
| AK163710 | 1.778952    | 0.44   | 24.6%  |
| AK163711 | 0.1158643   | 0.05   | 44.9%  |
| AK163747 | 2.96814     | 0.66   | 22.3%  |
| AK163775 | 0.1314902   | 0.08   | 57.8%  |
| AK163827 | 0.183043587 | 0.17   | 92.7%  |
| AK163997 | 0.01290722  | 0.01   | 59.5%  |
| AK164069 | 0.1513696   | 0.04   | 27.8%  |
| AK164083 | 2.716072    | 0.39   | 14.3%  |
| AK164098 | 0.2260272   | 0.08   | 33.7%  |
| AK164124 | 0.5233842   | 0.04   | 8.0%   |

|          |             |      |        |
|----------|-------------|------|--------|
| AK164126 | 7.124296    | 0.50 | 7.1%   |
| AK164180 | 0.06120654  | 0.03 | 51.4%  |
| AK164218 | 0.02377548  | 0.03 | 140.3% |
| AK164256 | 1.16554     | 0.13 | 11.3%  |
| AK164315 | 0.259877    | 0.12 | 44.5%  |
| AK164331 | 1.8968      | 0.42 | 22.0%  |
| AK164362 | 0.0118547   | 0.01 | 94.8%  |
| AK164420 | 0.016661252 | 0.01 | 83.9%  |
| AK164583 | 0.1823609   | 0.11 | 62.5%  |
| AK164611 | 0.2897762   | 0.06 | 20.7%  |
| AK164650 | 0.39130464  | 0.28 | 71.3%  |
| AK164741 | 0.010513346 | 0.01 | 73.5%  |
| AK164742 | 0.05321476  | 0.02 | 37.2%  |
| AK164779 | 0.1776542   | 0.05 | 26.3%  |
| AK164829 | 0.01252998  | 0.01 | 64.5%  |
| AK164836 | 0.2228802   | 0.05 | 22.8%  |
| AK164875 | 20.12512    | 0.77 | 3.8%   |
| AK164928 | 2.266       | 0.54 | 23.6%  |
| AK164976 | 0.4499468   | 0.15 | 32.8%  |
| AK165089 | 0.00525106  | 0.01 | 137.0% |
| AK165120 | 0.12370678  | 0.05 | 44.3%  |
| AK165129 | 25.46728    | 1.30 | 5.1%   |
| AK165297 | 0           | 0.00 |        |
| AK165329 | 0.04780576  | 0.06 | 118.0% |
| AK165338 | 0.0060344   | 0.01 | 223.6% |
| AK165366 | 0.0076521   | 0.01 | 138.6% |
| AK165443 | 0           | 0.00 |        |
| AK165489 | 0.02640986  | 0.02 | 92.2%  |
| AK165532 | 0.1668508   | 0.17 | 100.4% |
| AK165607 | 0.0057427   | 0.01 | 223.6% |
| AK165697 | 0.0040802   | 0.01 | 137.0% |
| AK165766 | 0.04046764  | 0.02 | 46.5%  |
| AK165776 | 0.08654172  | 0.07 | 77.0%  |
| AK165802 | 0.4124278   | 0.13 | 32.0%  |
| AK165804 | 0           | 0.00 |        |
| AK165817 | 13.6723     | 2.17 | 15.9%  |
| AK165835 | 0.00527032  | 0.01 | 223.6% |
| AK165854 | 0           | 0.00 |        |
| AK165876 | 0           | 0.00 |        |
| AK165889 | 5.347472    | 0.30 | 5.7%   |
| AK166041 | 0           | 0.00 |        |
| AK166044 | 0.03288202  | 0.02 | 52.3%  |
| AK166060 | 0.0022217   | 0.00 | 223.6% |
| AK166079 | 0.3024004   | 0.12 | 40.6%  |
| AK166159 | 0.00686454  | 0.01 | 137.0% |
| AK166274 | 0           | 0.00 |        |
| AK166336 | 0.00512152  | 0.01 | 162.9% |

|          |             |      |        |
|----------|-------------|------|--------|
| AK166404 | 0.12230736  | 0.09 | 73.2%  |
| AK166420 | 0.07489844  | 0.04 | 59.0%  |
| AK166453 | 36.47514    | 3.47 | 9.5%   |
| AK166469 | 1.1599914   | 0.23 | 20.2%  |
| AK166513 | 2.068248    | 0.11 | 5.3%   |
| AK166554 | 0           | 0.00 |        |
| AK166556 | 0           | 0.00 |        |
| AK166708 | 0.0298803   | 0.02 | 65.1%  |
| AK166773 | 1.0184272   | 0.08 | 8.1%   |
| AK166824 | 0.00566534  | 0.01 | 223.6% |
| AK166895 | 0.01927926  | 0.01 | 50.4%  |
| AK167137 | 0.02683392  | 0.01 | 22.3%  |
| AK167556 | 0.0095943   | 0.01 | 92.7%  |
| AK167606 | 0.4960056   | 0.08 | 16.6%  |
| AK167957 | 0           | 0.00 |        |
| AK168184 | 0.04518182  | 0.01 | 30.7%  |
| AK168746 | 0.04223162  | 0.02 | 52.6%  |
| AK168860 | 0.0394266   | 0.02 | 59.0%  |
| AK169220 | 0.00668834  | 0.01 | 137.6% |
| AK169479 | 0           | 0.00 |        |
| AK169482 | 0.15505478  | 0.07 | 43.0%  |
| AK169506 | 0           | 0.00 |        |
| AK169507 | 0.00943099  | 0.00 | 11.2%  |
| AK169509 | 0           | 0.00 |        |
| AK169510 | 0.06608104  | 0.03 | 51.6%  |
| AK169574 | 0.185713    | 0.04 | 19.8%  |
| AK169739 | 0.3565112   | 0.10 | 28.7%  |
| AK169777 | 14.91664    | 0.70 | 4.7%   |
| AK169807 | 0.006877876 | 0.01 | 159.6% |
| AK169831 | 9.811202    | 0.61 | 6.3%   |
| AK169894 | 3.994368    | 0.75 | 18.7%  |
| AK169954 | 1.3180238   | 0.34 | 25.8%  |
| AK169958 | 0.0592527   | 0.01 | 25.1%  |
| AK170078 | 1.6224364   | 0.44 | 26.8%  |
| AK170106 | 0.01770222  | 0.01 | 33.6%  |
| AK170112 | 24.3375     | 1.60 | 6.6%   |
| AK170194 | 0.03574362  | 0.01 | 32.8%  |
| AK170206 | 0.003156    | 0.01 | 223.6% |
| AK170301 | 0.00580918  | 0.01 | 139.0% |
| AK170353 | 0.001945766 | 0.00 | 223.6% |
| AK170409 | 0.00473802  | 0.01 | 223.6% |
| AK170464 | 0           | 0.00 |        |
| AK170612 | 0.010537    | 0.02 | 223.6% |
| AK170805 | 42.86576    | 2.51 | 5.9%   |
| AK170837 | 0.21187196  | 0.16 | 75.8%  |
| AK170868 | 0.00233608  | 0.01 | 223.6% |
| AK170928 | 0.1723826   | 0.02 | 12.7%  |

|          |             |      |        |
|----------|-------------|------|--------|
| AK171116 | 0.002847686 | 0.00 | 111.3% |
| AK171117 | 0.0457026   | 0.03 | 65.4%  |
| AK171153 | 0           | 0.00 |        |
| AK171159 | 3.361336    | 0.49 | 14.7%  |
| AK171183 | 0.1691      | 0.05 | 29.1%  |
| AK171382 | 0.14553764  | 0.05 | 35.7%  |
| AK171408 | 0           | 0.00 |        |
| AK171764 | 0.01816748  | 0.02 | 100.3% |
| AK171817 | 1.422096    | 0.11 | 7.5%   |
| AK171836 | 0.1718932   | 0.03 | 16.9%  |
| AK171902 | 1.1255988   | 0.34 | 30.5%  |
| AK171952 | 9.788048    | 1.08 | 11.1%  |
| AK171953 | 0.00357826  | 0.01 | 223.6% |
| AK171960 | 11.77422    | 0.58 | 5.0%   |
| AK171985 | 1.313499    | 0.41 | 31.3%  |
| AK172090 | 0.3007058   | 0.04 | 13.7%  |
| AK172139 | 1.551538    | 0.20 | 12.7%  |
| AK172190 | 0.168319    | 0.03 | 19.2%  |
| AK172315 | 0.10815026  | 0.07 | 61.2%  |
| AK172386 | 0           | 0.00 |        |
| AK172428 | 1.226766    | 0.13 | 10.6%  |
| AK172452 | 0           | 0.00 |        |
| AK172459 | 0.01908647  | 0.01 | 71.2%  |
| AK172630 | 0           | 0.00 |        |
| AK172672 | 0.3008256   | 0.06 | 19.5%  |
| AK172678 | 0.12501506  | 0.19 | 152.3% |
| AK172683 | 0           | 0.00 |        |
| AK172704 | 0.20499612  | 0.27 | 130.2% |
| AK172713 | 0.02748774  | 0.01 | 51.7%  |
| AK173072 | 8.749388    | 1.07 | 12.2%  |
| AK177174 | 2.251522    | 0.57 | 25.2%  |
| AK177718 | 0.5766524   | 0.22 | 38.9%  |
| AK177731 | 6.876734    | 0.43 | 6.3%   |
| AK177749 | 0.4603424   | 0.26 | 56.2%  |
| AK177772 | 3.330528    | 0.47 | 14.1%  |
| AK178082 | 0           | 0.00 |        |
| AK178359 | 2.7654132   | 2.16 | 78.2%  |
| AK178429 | 8.580744    | 1.65 | 19.3%  |
| AK178562 | 0.7040864   | 0.34 | 47.8%  |
| AK178706 | 6.079762    | 0.24 | 4.0%   |
| AK179413 | 0.8445722   | 0.23 | 27.7%  |
| AK179731 | 0           | 0.00 |        |
| AK179786 | 0.1948852   | 0.06 | 33.0%  |
| AK180240 | 31.9103     | 1.86 | 5.8%   |
| AK180382 | 0.3400166   | 0.16 | 47.8%  |
| AK180697 | 5.721148    | 0.75 | 13.1%  |
| AK180712 | 1.61178     | 0.40 | 25.0%  |

|          |             |      |        |
|----------|-------------|------|--------|
| AK180825 | 0           | 0.00 |        |
| AK180911 | 0.5419074   | 0.27 | 49.4%  |
| AK180939 | 0.06459586  | 0.06 | 92.8%  |
| AK181631 | 0           | 0.00 |        |
| AK181830 | 1.471843    | 0.61 | 41.6%  |
| AK181896 | 3.0459166   | 6.60 | 216.5% |
| AK181982 | 1.0138518   | 0.38 | 37.4%  |
| AK182361 | 0.627501    | 0.29 | 47.0%  |
| AK182695 | 3.028416    | 1.00 | 32.9%  |
| AK182874 | 4.493668    | 0.63 | 14.0%  |
| AK182887 | 5.124464    | 0.74 | 14.5%  |
| AK183134 | 0.6114618   | 0.14 | 23.0%  |
| AK183258 | 0           | 0.00 |        |
| AK183279 | 0           | 0.00 |        |
| AK183458 | 4.891632    | 1.08 | 22.1%  |
| AK183986 | 0           | 0.00 |        |
| AK184121 | 0.005628374 | 0.00 | 71.6%  |
| AK184225 | 3.398994    | 0.69 | 20.3%  |
| AK184603 | 1.4090362   | 0.49 | 34.8%  |
| AK184713 | 0.11789622  | 0.11 | 90.2%  |
| AK184873 | 0.0206876   | 0.05 | 223.6% |
| AK185421 | 0.4677646   | 0.13 | 28.3%  |
| AK185530 | 2.481758    | 0.77 | 31.0%  |
| AK185549 | 0.0433016   | 0.10 | 223.6% |
| AK185681 | 77.08938    | 5.46 | 7.1%   |
| AK185715 | 0.5401396   | 0.34 | 62.2%  |
| AK185737 | 18.45072    | 2.82 | 15.3%  |
| AK185785 | 0.37685252  | 0.27 | 72.6%  |
| AK185798 | 0.1176362   | 0.16 | 137.5% |
| AK185910 | 0           | 0.00 |        |
| AK186650 | 0           | 0.00 |        |
| AK187054 | 139.691     | 6.23 | 4.5%   |
| AK187371 | 1.3126716   | 0.26 | 19.6%  |
| AK187594 | 0.52455     | 0.33 | 63.3%  |
| AK188320 | 1.537116    | 0.37 | 24.1%  |
| AK188430 | 5.364138    | 1.39 | 26.0%  |
| AK188772 | 0.8638582   | 0.30 | 35.1%  |
| AK188812 | 0.4560132   | 0.22 | 48.4%  |
| AK188991 | 0.274344    | 0.38 | 138.7% |
| AK189432 | 2.346076    | 0.52 | 22.2%  |
| AK189470 | 9.336638    | 1.34 | 14.3%  |
| AK189601 | 0           | 0.00 |        |
| AK189633 | 6.700042    | 1.07 | 16.0%  |
| AK189748 | 10.430934   | 2.19 | 21.0%  |
| AK190196 | 3.89572     | 0.17 | 4.5%   |
| AK190465 | 0.462671    | 0.12 | 26.1%  |
| AK190497 | 1.676541    | 2.40 | 143.2% |

|          |            |      |        |
|----------|------------|------|--------|
| AK190704 | 0.208051   | 0.14 | 67.9%  |
| AK191080 | 2.737652   | 0.83 | 30.4%  |
| AK191411 | 0.300622   | 0.24 | 80.8%  |
| AK191492 | 0          | 0.00 |        |
| AK191498 | 1.19927    | 0.51 | 42.6%  |
| AK191723 | 0          | 0.00 |        |
| AK191823 | 0.4554206  | 0.31 | 68.2%  |
| AK192194 | 1.6163196  | 0.59 | 36.6%  |
| AK192218 | 12.07132   | 0.95 | 7.9%   |
| AK192544 | 48.21896   | 7.89 | 16.4%  |
| AK192563 | 8.469178   | 0.47 | 5.6%   |
| AK192647 | 2.186144   | 0.34 | 15.3%  |
| AK192827 | 3.058228   | 0.56 | 18.2%  |
| AK192985 | 0.13109628 | 0.03 | 26.0%  |
| AK193394 | 0          | 0.00 |        |
| AK193439 | 0          | 0.00 |        |
| AK193714 | 14.3858    | 0.67 | 4.7%   |
| AK194005 | 0.7564374  | 0.16 | 20.9%  |
| AK194036 | 0          | 0.00 |        |
| AK194371 | 5.025018   | 0.52 | 10.4%  |
| AK194920 | 1.423334   | 0.19 | 13.1%  |
| AK195221 | 0.06771182 | 0.01 | 16.2%  |
| AK195420 | 0          | 0.00 |        |
| AK195428 | 0          | 0.00 |        |
| AK195755 | 0.09698664 | 0.03 | 28.6%  |
| AK195788 | 0          | 0.00 |        |
| AK195902 | 0.0525182  | 0.12 | 223.6% |
| AK195979 | 0.0552592  | 0.12 | 223.6% |
| AK196015 | 0.13062794 | 0.09 | 66.8%  |
| AK196141 | 0.921862   | 0.33 | 36.1%  |
| AK196214 | 0.292644   | 0.14 | 47.3%  |
| AK196542 | 3.54514    | 1.34 | 37.8%  |
| AK196832 | 0          | 0.00 |        |
| AK196959 | 0.1614836  | 0.05 | 28.4%  |
| AK197085 | 6.098656   | 0.59 | 9.7%   |
| AK197526 | 9.487962   | 1.65 | 17.4%  |
| AK197603 | 0.109851   | 0.11 | 95.9%  |
| AK197782 | 22.7088    | 0.54 | 2.4%   |
| AK197973 | 0.4227218  | 0.22 | 51.9%  |
| AK198271 | 3.724308   | 1.03 | 27.6%  |
| AK198904 | 12.053398  | 1.90 | 15.8%  |
| AK198984 | 0.7406712  | 0.22 | 29.1%  |
| AK199184 | 0          | 0.00 |        |
| AK199258 | 24.19912   | 3.33 | 13.7%  |
| AK199358 | 2.066158   | 0.30 | 14.5%  |
| AK199495 | 0.2683538  | 0.08 | 28.0%  |
| AK199694 | 0.7887996  | 0.24 | 30.8%  |

|          |            |      |        |
|----------|------------|------|--------|
| AK199756 | 0.1470466  | 0.21 | 145.6% |
| Ak2      | 8.554982   | 0.83 | 9.7%   |
| AK200207 | 0.4473218  | 0.30 | 67.6%  |
| AK200600 | 0.9269204  | 0.19 | 20.3%  |
| AK200837 | 1.177838   | 0.46 | 38.8%  |
| AK201601 | 11.75448   | 1.36 | 11.5%  |
| AK202078 | 1.788454   | 0.59 | 33.1%  |
| AK202488 | 0          | 0.00 |        |
| AK202494 | 1.865552   | 0.45 | 24.2%  |
| AK202543 | 5.786278   | 1.72 | 29.7%  |
| AK202580 | 0.9746928  | 0.37 | 37.6%  |
| AK202663 | 0.0297132  | 0.06 | 195.1% |
| AK202794 | 22.14436   | 1.46 | 6.6%   |
| AK203140 | 106.0336   | 3.78 | 3.6%   |
| AK203176 | 23.7071    | 3.61 | 15.2%  |
| AK203396 | 3.744372   | 0.97 | 26.0%  |
| AK203628 | 0.3674538  | 0.22 | 59.2%  |
| AK203706 | 1.893986   | 0.42 | 22.3%  |
| AK203938 | 0.22875348 | 0.19 | 81.2%  |
| AK204095 | 0          | 0.00 |        |
| AK204212 | 8.499652   | 2.53 | 29.7%  |
| AK204365 | 1.1792268  | 0.53 | 44.6%  |
| AK204442 | 3.879198   | 0.38 | 9.7%   |
| AK204443 | 18.26638   | 1.83 | 10.0%  |
| AK204799 | 0.5881916  | 0.16 | 27.7%  |
| AK204824 | 5.64979    | 0.66 | 11.7%  |
| AK204918 | 0          | 0.00 |        |
| AK205032 | 0.434666   | 0.28 | 63.8%  |
| AK205147 | 0.4972064  | 0.09 | 18.6%  |
| AK205190 | 0.1811142  | 0.18 | 100.2% |
| AK205332 | 0.0360502  | 0.08 | 223.6% |
| AK205379 | 0.05526546 | 0.08 | 149.0% |
| AK205396 | 0.0550448  | 0.08 | 136.9% |
| AK205555 | 26.91446   | 1.52 | 5.7%   |
| AK205829 | 1.77149    | 0.50 | 28.4%  |
| AK205936 | 4.774548   | 1.95 | 40.9%  |
| AK206103 | 27.39176   | 3.76 | 13.7%  |
| AK206637 | 20.5855    | 1.29 | 6.3%   |
| AK206655 | 0.9578094  | 0.41 | 42.8%  |
| AK206687 | 1.60834    | 0.32 | 19.6%  |
| AK206780 | 0.1890526  | 0.12 | 61.0%  |
| AK206957 | 8.425232   | 0.81 | 9.6%   |
| AK207024 | 0.37565176 | 0.25 | 66.8%  |
| AK207408 | 2.691778   | 0.91 | 33.6%  |
| AK207593 | 0.5636636  | 0.16 | 28.3%  |
| AK207688 | 0.01125414 | 0.03 | 223.6% |
| AK207899 | 0.0759064  | 0.10 | 138.0% |



|          |            |      |        |
|----------|------------|------|--------|
| AK208354 | 0          | 0.00 |        |
| AK208404 | 26.89766   | 5.25 | 19.5%  |
| AK208460 | 9.978502   | 1.14 | 11.4%  |
| AK208554 | 16.99548   | 0.40 | 2.4%   |
| AK208597 | 8.626362   | 1.19 | 13.8%  |
| AK209396 | 1.6728074  | 1.13 | 67.8%  |
| AK209590 | 3.758098   | 0.34 | 9.1%   |
| AK209600 | 5.227634   | 0.76 | 14.5%  |
| AK209647 | 38.48194   | 1.43 | 3.7%   |
| AK209715 | 9.537928   | 2.24 | 23.4%  |
| AK209885 | 5.544928   | 0.84 | 15.1%  |
| AK210533 | 0.0242318  | 0.05 | 223.6% |
| AK210662 | 0.7105528  | 0.23 | 31.7%  |
| AK211096 | 2.027652   | 0.26 | 12.9%  |
| AK211120 | 0.0859318  | 0.09 | 104.7% |
| AK211336 | 1.0098244  | 0.54 | 53.1%  |
| AK211473 | 2.794726   | 0.71 | 25.3%  |
| AK211659 | 0          | 0.00 |        |
| AK212208 | 6.590664   | 0.92 | 13.9%  |
| AK212603 | 3.36329    | 0.64 | 19.1%  |
| AK212710 | 0.0873782  | 0.20 | 223.6% |
| AK212965 | 10.508454  | 1.06 | 10.1%  |
| AK213166 | 0.2737484  | 0.27 | 100.4% |
| AK213200 | 0.4037918  | 0.21 | 51.6%  |
| AK213404 | 0.2613294  | 0.03 | 11.5%  |
| AK213543 | 1.884832   | 0.24 | 12.7%  |
| AK213563 | 0.6933576  | 0.14 | 20.3%  |
| AK213609 | 35.2583    | 3.20 | 9.1%   |
| AK213636 | 0.0439746  | 0.10 | 223.6% |
| AK213652 | 0.4403874  | 0.27 | 61.2%  |
| AK213749 | 0.1945446  | 0.03 | 16.8%  |
| AK213775 | 1.0955128  | 0.56 | 50.9%  |
| AK214072 | 0.2809846  | 0.28 | 97.9%  |
| AK214167 | 0.5386236  | 0.06 | 11.3%  |
| AK214332 | 0          | 0.00 |        |
| AK214371 | 0.6737044  | 0.37 | 54.5%  |
| AK214451 | 3.657396   | 2.23 | 60.9%  |
| AK214512 | 2.642428   | 0.66 | 25.0%  |
| AK214583 | 4.611798   | 0.47 | 10.2%  |
| AK214641 | 1.76691    | 0.13 | 7.6%   |
| AK214683 | 0.2475174  | 0.14 | 57.2%  |
| AK215081 | 0.05691388 | 0.03 | 58.3%  |
| AK215237 | 0.5440924  | 0.29 | 53.3%  |
| AK215297 | 0.37212    | 0.35 | 95.4%  |
| AK215506 | 0          | 0.00 |        |
| AK215526 | 2.037182   | 0.55 | 26.8%  |
| AK215842 | 2.311842   | 0.55 | 23.6%  |

|          |             |      |        |
|----------|-------------|------|--------|
| AK216043 | 2.240264    | 0.49 | 21.9%  |
| AK216440 | 0.5534516   | 0.18 | 32.9%  |
| AK216443 | 0.1487042   | 0.20 | 137.0% |
| AK216459 | 0           | 0.00 |        |
| AK216578 | 0.0634534   | 0.14 | 223.6% |
| AK216819 | 0           | 0.00 |        |
| AK216824 | 0.07376536  | 0.12 | 160.3% |
| AK216857 | 0           | 0.00 |        |
| AK216920 | 5.491554    | 1.06 | 19.3%  |
| AK217025 | 14.2216     | 1.27 | 9.0%   |
| AK217047 | 1.0068436   | 0.60 | 59.5%  |
| AK217058 | 0.5554112   | 0.09 | 15.3%  |
| AK217269 | 0.02858112  | 0.04 | 147.4% |
| AK217604 | 4.857452    | 0.50 | 10.4%  |
| AK217757 | 0           | 0.00 |        |
| AK217807 | 0.3704386   | 0.35 | 93.5%  |
| AK217854 | 7.608952    | 1.07 | 14.0%  |
| AK217856 | 0.24710098  | 0.11 | 44.4%  |
| AK217863 | 1.66782     | 0.43 | 25.9%  |
| AK217931 | 0.7307152   | 0.21 | 28.9%  |
| AK217941 | 0.0997042   | 0.22 | 223.6% |
| AK217959 | 0.4541894   | 0.28 | 61.8%  |
| AK217986 | 0.0582136   | 0.08 | 137.5% |
| AK218226 | 0.6525636   | 0.32 | 49.2%  |
| AK218261 | 1.1730226   | 0.67 | 57.1%  |
| AK218282 | 0           | 0.00 |        |
| AK218396 | 0           | 0.00 |        |
| AK218399 | 0           | 0.00 |        |
| AK218564 | 0           | 0.00 |        |
| AK219036 | 0.4370698   | 0.14 | 31.5%  |
| AK219068 | 6.699902    | 0.48 | 7.2%   |
| AK219219 | 0.4201726   | 0.40 | 94.4%  |
| AK219239 | 9.039322    | 0.53 | 5.8%   |
| AK219417 | 0.14123114  | 0.11 | 75.6%  |
| AK219629 | 1.2713582   | 0.23 | 18.2%  |
| AK219638 | 0.17502094  | 0.09 | 54.1%  |
| AK219843 | 0.1183754   | 0.17 | 140.2% |
| AK220016 | 358.7628    | 9.39 | 2.6%   |
| AK220028 | 0.028273    | 0.06 | 223.6% |
| AK220210 | 0.06812392  | 0.01 | 19.0%  |
| AK220484 | 2.137586    | 0.04 | 2.0%   |
| AK224942 | 0.212402672 | 0.47 | 223.6% |
| Ak3      | 20.8128     | 0.71 | 3.4%   |
| Ak311    | 3.61829     | 0.83 | 22.9%  |
| Ak5      | 7.234678    | 1.02 | 14.1%  |
| Ak7      | 0.0542557   | 0.06 | 106.4% |
| Akap1    | 7.168334    | 0.24 | 3.4%   |

|          |            |       |        |
|----------|------------|-------|--------|
| Akap10   | 7.457242   | 1.05  | 14.0%  |
| Akap11   | 33.9317    | 1.48  | 4.4%   |
| Akap12   | 29.38948   | 1.67  | 5.7%   |
| Akap13   | 2.143338   | 0.40  | 18.7%  |
| Akap14   | 0.01380922 | 0.02  | 141.3% |
| Akap2    | 17.54752   | 0.64  | 3.7%   |
| Akap3    | 0.1367286  | 0.03  | 20.9%  |
| Akap4    | 0.0027299  | 0.01  | 223.6% |
| Akap6    | 17.32826   | 1.00  | 5.8%   |
| Akap7    | 7.449466   | 0.25  | 3.4%   |
| Akap8    | 8.016926   | 1.56  | 19.4%  |
| Akap8l   | 18.53994   | 2.21  | 11.9%  |
| Akap9    | 5.627072   | 0.36  | 6.4%   |
| AKAP95   | 7.216186   | 0.85  | 11.8%  |
| Akd2     | 2.57843    | 0.42  | 16.5%  |
| Akna     | 0.4089436  | 0.04  | 9.8%   |
| Akp2     | 0.8210788  | 0.09  | 10.8%  |
| Akp3     | 0.0187953  | 0.03  | 155.5% |
| Akp5     | 0          | 0.00  |        |
| Akr1a4   | 155.2596   | 11.06 | 7.1%   |
| Akr1b3   | 1.973044   | 0.41  | 20.8%  |
| Akr1b7   | 0.02517612 | 0.03  | 133.3% |
| Akr1b8   | 0.155426   | 0.11  | 71.3%  |
| Akr1c12  | 0.3540152  | 0.08  | 21.6%  |
| Akr1c13  | 0.805666   | 0.25  | 31.5%  |
| Akr1c14  | 0.2825318  | 0.06  | 21.4%  |
| Akr1c18  | 0          | 0.00  |        |
| Akr1c19  | 0.04320098 | 0.04  | 86.1%  |
| Akr1c20  | 0          | 0.00  |        |
| Akr1c21  | 0.00669882 | 0.01  | 223.6% |
| Akr1c6   | 0.00496076 | 0.01  | 223.6% |
| Akr1d1   | 0          | 0.00  |        |
| Akr1e1   | 5.88376    | 0.54  | 9.3%   |
| Akr7a5   | 7.316156   | 0.59  | 8.0%   |
| Akt1     | 47.14404   | 2.33  | 4.9%   |
| Akt1s1   | 11.68802   | 0.44  | 3.8%   |
| Akt2     | 4.894596   | 0.26  | 5.4%   |
| Akt3     | 26.5928    | 1.01  | 3.8%   |
| Aktip    | 31.31308   | 2.07  | 6.6%   |
| Alad     | 8.16739    | 1.04  | 12.8%  |
| Alas1    | 11.69158   | 0.33  | 2.9%   |
| Alas2    | 0.05726094 | 0.01  | 21.3%  |
| Alb      | 0.01090006 | 0.01  | 99.8%  |
| Alcam    | 31.60768   | 1.93  | 6.1%   |
| Aldh16a1 | 2.730574   | 1.05  | 38.5%  |
| Aldh18a1 | 12.37798   | 0.39  | 3.1%   |
| Aldh1a1  | 1.688304   | 0.25  | 15.0%  |

|          |            |       |        |
|----------|------------|-------|--------|
| Aldh1a2  | 0.2254504  | 0.04  | 18.0%  |
| Aldh1a3  | 0.692447   | 0.06  | 8.6%   |
| Aldh1a7  | 1.877378   | 0.20  | 10.9%  |
| Aldh1b1  | 4.041104   | 0.46  | 11.3%  |
| Aldh1l1  | 12.84906   | 1.49  | 11.6%  |
| Aldh1l2  | 3.940512   | 0.59  | 15.0%  |
| Aldh2    | 14.01956   | 0.50  | 3.6%   |
| Aldh3a1  | 0.01110584 | 0.02  | 223.6% |
| Aldh3a2  | 12.59774   | 0.83  | 6.6%   |
| Aldh3b1  | 0.160962   | 0.06  | 40.1%  |
| Aldh3b2  | 0.01409358 | 0.01  | 68.6%  |
| Aldh4a1  | 5.04953    | 0.32  | 6.3%   |
| Aldh5a1  | 21.68462   | 1.16  | 5.4%   |
| Aldh6    | 0.03619984 | 0.01  | 19.4%  |
| Aldh6a1  | 10.519254  | 0.64  | 6.1%   |
| Aldh7a1  | 7.301166   | 0.33  | 4.5%   |
| Aldh8a1  | 0.07688476 | 0.02  | 30.4%  |
| Aldh9a1  | 12.655     | 0.93  | 7.3%   |
| Aldoa    | 417.5116   | 23.88 | 5.7%   |
| Aldoart1 | 29.61456   | 1.90  | 6.4%   |
| Aldoart2 | 28.3713    | 2.05  | 7.2%   |
| Aldob    | 1.45943    | 0.27  | 18.6%  |
| Aldoc    | 251.3778   | 16.39 | 6.5%   |
| Alf4     | 11.53794   | 0.66  | 5.8%   |
| Alg1     | 10.18455   | 0.45  | 4.4%   |
| Alg10b   | 15.84342   | 1.04  | 6.5%   |
| Alg11    | 13.30912   | 1.09  | 8.2%   |
| Alg12    | 6.647436   | 0.23  | 3.4%   |
| Alg13    | 4.750416   | 0.82  | 17.3%  |
| Alg14    | 8.013654   | 0.44  | 5.5%   |
| Alg2     | 93.69948   | 3.79  | 4.0%   |
| Alg3     | 8.58252    | 0.76  | 8.8%   |
| Alg5     | 10.066274  | 0.68  | 6.7%   |
| Alg6     | 3.88132    | 0.26  | 6.8%   |
| Alg8     | 3.14098    | 0.35  | 11.0%  |
| Alg9     | 12.30412   | 0.39  | 3.2%   |
| alk      | 2.8260382  | 1.80  | 63.8%  |
| Alk      | 2.784578   | 0.61  | 21.9%  |
| Alkbh1   | 7.690624   | 2.54  | 33.0%  |
| Alkbh2   | 1.320416   | 0.18  | 13.6%  |
| Alkbh3   | 4.074526   | 0.37  | 9.0%   |
| Alkbh4   | 2.374378   | 0.15  | 6.5%   |
| Alkbh5   | 8.344082   | 0.39  | 4.7%   |
| Alkbh6   | 10.328836  | 0.78  | 7.5%   |
| Alkbh7   | 9.357522   | 1.09  | 11.7%  |
| Alkbh8   | 12.33324   | 0.83  | 6.7%   |
| Allc     | 0          | 0.00  |        |

|          |             |      |        |
|----------|-------------|------|--------|
| Alms1    | 0.01251102  | 0.02 | 145.6% |
| Alox12   | 0.011550446 | 0.02 | 135.2% |
| Alox12b  | 0           | 0.00 |        |
| Alox12e  | 0.00208524  | 0.00 | 223.6% |
| Alox15   | 0.01950178  | 0.01 | 63.6%  |
| Alox5    | 0.04991294  | 0.05 | 92.1%  |
| Alox5ap  | 0.19135088  | 0.08 | 44.4%  |
| Alox8    | 0.001527962 | 0.00 | 223.6% |
| Aloxe3   | 1.0749296   | 0.19 | 17.8%  |
| alpha1B  | 7.528746    | 0.46 | 6.1%   |
| Alpi     | 0           | 0.00 |        |
| Alpk2    | 0.01537028  | 0.00 | 27.8%  |
| Alpk3    | 0.05680708  | 0.02 | 40.6%  |
| Als2     | 11.85186    | 0.75 | 6.3%   |
| Als2cl   | 0.7490402   | 0.04 | 5.8%   |
| Als2cr11 | 0.0043156   | 0.01 | 223.6% |
| Als2cr12 | 0           | 0.00 |        |
| Als2cr13 | 19.56434    | 0.33 | 1.7%   |
| Als2cr2  | 14.31722    | 1.24 | 8.6%   |
| Als2cr4  | 7.913008    | 0.35 | 4.4%   |
| Als2cr7  | 0.08540938  | 0.05 | 59.7%  |
| Alx1     | 0.09822938  | 0.06 | 58.3%  |
| Alx3     | 0.0155453   | 0.02 | 105.6% |
| Alx4     | 0.1511334   | 0.03 | 20.4%  |
| AM295304 | 0.019166    | 0.01 | 39.2%  |
| Amac1    | 0.1069502   | 0.04 | 41.9%  |
| Amacr    | 3.562556    | 0.31 | 8.6%   |
| Ambn     | 0           | 0.00 |        |
| Ambp     | 0.00916038  | 0.01 | 138.8% |
| Amd2     | 3.120666    | 0.18 | 5.8%   |
| Amdhd1   | 0           | 0.00 |        |
| Amdhd2   | 7.49439     | 0.96 | 12.9%  |
| Amelx    | 0.00665654  | 0.01 | 223.6% |
| Amfr     | 43.82658    | 1.67 | 3.8%   |
| Amh      | 0.36747     | 0.14 | 38.7%  |
| Amhr2    | 0.0853261   | 0.03 | 35.0%  |
| Amica1   | 0.0191405   | 0.01 | 61.0%  |
| Amigo1   | 13.29902    | 0.89 | 6.7%   |
| Amigo2   | 4.11945     | 0.24 | 5.8%   |
| Amigo3   | 1.0828198   | 0.09 | 8.7%   |
| Ammecr1  | 1.923578    | 0.17 | 8.7%   |
| Ammecr1l | 9.300904    | 0.97 | 10.5%  |
| Amn      | 0.5092014   | 0.08 | 16.4%  |
| Amot     | 3.720904    | 0.11 | 2.8%   |
| Amotl1   | 5.842764    | 0.54 | 9.2%   |
| Amotl2   | 5.851344    | 0.34 | 5.8%   |
| Ampd1    | 0.00325098  | 0.01 | 223.6% |

|         |            |      |        |
|---------|------------|------|--------|
| Ampd2   | 19.92656   | 0.19 | 1.0%   |
| Ampd3   | 2.873214   | 0.17 | 5.8%   |
| Amph    | 70.34288   | 1.23 | 1.8%   |
| Amt     | 6.45133    | 0.89 | 13.8%  |
| Amy1    | 21.37636   | 4.65 | 21.8%  |
| amy-1   | 0.1653098  | 0.05 | 28.3%  |
| Amy2-1  | 0.0451621  | 0.03 | 60.6%  |
| Anapc1  | 14.8266    | 0.81 | 5.4%   |
| Anapc10 | 3.337196   | 0.42 | 12.5%  |
| Anapc11 | 12.10718   | 0.61 | 5.0%   |
| Anapc13 | 15.68044   | 1.16 | 7.4%   |
| Anapc2  | 25.31548   | 0.93 | 3.7%   |
| Anapc4  | 28.04634   | 1.42 | 5.1%   |
| Anapc5  | 65.54418   | 1.47 | 2.2%   |
| Anapc7  | 13.05314   | 0.77 | 5.9%   |
| Ang     | 1.49889822 | 1.50 | 99.8%  |
| Ang2    | 0          | 0.00 |        |
| Ang4    | 0          | 0.00 |        |
| Ang6    | 0          | 0.00 |        |
| Angel1  | 3.100528   | 0.28 | 9.0%   |
| Angel2  | 9.484262   | 0.65 | 6.9%   |
| Angpt1  | 2.207076   | 0.25 | 11.2%  |
| Angpt2  | 0.03362544 | 0.02 | 55.1%  |
| Angpt4  | 0.03304978 | 0.02 | 73.6%  |
| Angptl1 | 0.15925502 | 0.05 | 31.8%  |
| Angptl2 | 0.3434     | 0.09 | 26.4%  |
| Angptl3 | 0.00340804 | 0.01 | 223.6% |
| Angptl4 | 0.07629118 | 0.05 | 64.0%  |
| Angptl6 | 2.926336   | 0.15 | 5.0%   |
| Angptl7 | 0.00323334 | 0.01 | 223.6% |
| Ank     | 50.05826   | 1.66 | 3.3%   |
| Ank1    | 13.34578   | 1.06 | 7.9%   |
| Ank2    | 103.73712  | 4.81 | 4.6%   |
| Ank3    | 15.96948   | 2.13 | 13.3%  |
| Ankar   | 0.01611278 | 0.02 | 98.8%  |
| Ankfn1  | 0.1599666  | 0.02 | 13.7%  |
| Ankfy1  | 7.524544   | 0.66 | 8.8%   |
| Ankhd1  | 12.98402   | 0.71 | 5.5%   |
| Ankhzn  | 0.14325438 | 0.11 | 77.7%  |
| Ankib1  | 7.597938   | 0.29 | 3.8%   |
| Ankk1   | 0.01805092 | 0.01 | 59.7%  |
| Ankmy1  | 0.12234126 | 0.03 | 25.9%  |
| Ankmy2  | 28.35184   | 1.67 | 5.9%   |
| Ankra2  | 13.70198   | 0.59 | 4.3%   |
| Ankrd1  | 0.01857186 | 0.02 | 100.7% |
| Ankrd10 | 15.05196   | 1.01 | 6.7%   |
| Ankrd11 | 17.54032   | 1.37 | 7.8%   |

|          |            |      |        |
|----------|------------|------|--------|
| Ankrd12  | 7.635716   | 0.47 | 6.1%   |
| Ankrd13a | 10.9828    | 0.43 | 3.9%   |
| Ankrd13b | 23.7041    | 1.45 | 6.1%   |
| Ankrd13c | 29.68278   | 0.77 | 2.6%   |
| Ankrd13d | 42.1417    | 0.94 | 2.2%   |
| Ankrd15  | 1.671298   | 0.15 | 8.8%   |
| Ankrd16  | 3.512446   | 0.12 | 3.5%   |
| Ankrd17  | 27.162     | 1.21 | 4.5%   |
| Ankrd2   | 0.0076757  | 0.02 | 223.6% |
| Ankrd22  | 0.0037878  | 0.01 | 223.6% |
| Ankrd23  | 3.3472     | 0.40 | 11.8%  |
| Ankrd24  | 8.205606   | 0.75 | 9.1%   |
| Ankrd25  | 1.298948   | 0.16 | 12.3%  |
| Ankrd26  | 2.722324   | 0.35 | 13.0%  |
| Ankrd27  | 4.95361    | 0.26 | 5.3%   |
| Ankrd28  | 6.800212   | 0.31 | 4.6%   |
| Ankrd32  | 5.028036   | 0.22 | 4.4%   |
| Ankrd33  | 0.09572374 | 0.06 | 57.5%  |
| Ankrd34  | 5.130116   | 0.24 | 4.7%   |
| Ankrd35  | 0.6310588  | 0.09 | 14.3%  |
| Ankrd36  | 0          | 0.00 |        |
| Ankrd37  | 1.8572658  | 1.03 | 55.4%  |
| Ankrd38  | 4.68356    | 0.50 | 10.7%  |
| Ankrd39  | 2.676326   | 0.19 | 7.3%   |
| Ankrd40  | 19.30544   | 0.72 | 3.8%   |
| Ankrd41  | 0.12628148 | 0.06 | 47.2%  |
| Ankrd42  | 4.920626   | 0.27 | 5.5%   |
| Ankrd43  | 1.945768   | 0.20 | 10.2%  |
| Ankrd44  | 3.464344   | 0.26 | 7.5%   |
| Ankrd45  | 1.0798216  | 0.11 | 10.6%  |
| Ankrd46  | 100.90406  | 3.47 | 3.4%   |
| Ankrd47  | 0.7252206  | 0.13 | 17.6%  |
| Ankrd48  | 0          | 0.00 |        |
| Ankrd49  | 3.789594   | 0.27 | 7.0%   |
| Ankrd5   | 0.13180538 | 0.04 | 29.3%  |
| Ankrd50  | 21.3237    | 1.25 | 5.9%   |
| Ankrd52  | 19.65906   | 0.92 | 4.7%   |
| Ankrd53  | 0.16340224 | 0.09 | 53.7%  |
| Ankrd54  | 4.623802   | 0.51 | 11.0%  |
| Ankrd55  | 0.4001458  | 0.08 | 20.4%  |
| Ankrd56  | 0.7225734  | 0.15 | 20.6%  |
| Ankrd58  | 0          | 0.00 |        |
| Ankrd6   | 1.184358   | 0.06 | 5.4%   |
| Ankrd7   | 0          | 0.00 |        |
| Ankrd9   | 3.1306     | 0.37 | 11.7%  |
| Anks1    | 3.852752   | 0.19 | 4.9%   |
| Anks1b   | 21.42746   | 0.66 | 3.1%   |

|         |             |      |        |
|---------|-------------|------|--------|
| Anks3   | 8.643034    | 0.99 | 11.4%  |
| Anks4b  | 0           | 0.00 |        |
| Anks6   | 2.033938    | 0.18 | 8.8%   |
| Ankzf1  | 6.795324    | 0.66 | 9.8%   |
| Anln    | 0.7577428   | 0.18 | 23.4%  |
| AnMKRN1 | 0.4581144   | 0.19 | 41.0%  |
| Anp32a  | 39.69906    | 1.96 | 4.9%   |
| Anp32b  | 18.1845     | 1.23 | 6.8%   |
| Anp32e  | 21.14498    | 2.53 | 12.0%  |
| Anpep   | 1.0157404   | 0.19 | 18.8%  |
| Antxr1  | 2.486724    | 0.29 | 11.9%  |
| Antxr2  | 1.525348    | 0.38 | 24.7%  |
| Antxrl  | 0           | 0.00 |        |
| Anubl1  | 1.613194    | 0.19 | 12.0%  |
| Anx3    | 0.09102494  | 0.02 | 24.4%  |
| Anxa1   | 0.976365    | 0.08 | 8.2%   |
| Anxa10  | 0.03781298  | 0.02 | 41.9%  |
| Anxa11  | 0.335689    | 0.09 | 27.1%  |
| Anxa13  | 0.01003006  | 0.01 | 138.8% |
| Anxa2   | 8.645658    | 2.10 | 24.3%  |
| Anxa3   | 0.5774076   | 0.11 | 19.6%  |
| Anxa4   | 2.43035     | 0.71 | 29.3%  |
| Anxa5   | 20.56542    | 1.59 | 7.7%   |
| Anxa6   | 39.89338    | 5.15 | 12.9%  |
| Anxa7   | 11.9583     | 0.78 | 6.5%   |
| Anxa8   | 0.06963212  | 0.02 | 29.7%  |
| Anxa9   | 2.655452    | 0.66 | 24.7%  |
| Aoah    | 0.05773048  | 0.03 | 44.3%  |
| Aoc2    | 0.8778298   | 0.12 | 13.7%  |
| Aoc3    | 0.02436714  | 0.01 | 42.8%  |
| Aof1    | 2.50601     | 0.50 | 20.1%  |
| Aof2    | 21.77774    | 0.71 | 3.3%   |
| AOP2    | 1.0248496   | 0.58 | 56.4%  |
| Aox1    | 0.12963018  | 0.07 | 57.5%  |
| Aox3    | 0.04600006  | 0.02 | 42.8%  |
| Aox3l1  | 0.005094034 | 0.00 | 58.5%  |
| Aox4    | 0.3664106   | 0.04 | 11.3%  |
| Ap1b1   | 63.08414    | 2.00 | 3.2%   |
| Ap1g1   | 26.4976     | 1.62 | 6.1%   |
| Ap1g2   | 3.225852    | 0.73 | 22.5%  |
| Ap1gbp1 | 10.204262   | 0.65 | 6.4%   |
| Ap1m1   | 40.47606    | 2.63 | 6.5%   |
| Ap1m2   | 0.19859284  | 0.12 | 62.1%  |
| Ap1s1   | 36.03122    | 3.06 | 8.5%   |
| Ap1s2   | 71.95616    | 1.58 | 2.2%   |
| Ap1s3   | 0.7918322   | 0.18 | 22.2%  |
| Ap2a1   | 89.73118    | 2.89 | 3.2%   |



|         |            |       |       |
|---------|------------|-------|-------|
| Ap2a2   | 54.65592   | 2.36  | 4.3%  |
| Ap2b1   | 80.57466   | 4.01  | 5.0%  |
| Ap2m1   | 16.8416    | 0.71  | 4.2%  |
| Ap2s1   | 63.71916   | 2.78  | 4.4%  |
| Ap3b1   | 11.25322   | 0.13  | 1.2%  |
| Ap3b2   | 59.16524   | 2.44  | 4.1%  |
| Ap3d1   | 48.46222   | 1.85  | 3.8%  |
| Ap3m1   | 7.13748    | 0.71  | 9.9%  |
| Ap3m2   | 31.85406   | 0.33  | 1.0%  |
| Ap3s1   | 14.4006    | 0.57  | 3.9%  |
| Ap3s2   | 22.57362   | 0.49  | 2.2%  |
| Ap4b1   | 7.691262   | 0.39  | 5.1%  |
| Ap4e1   | 3.680306   | 0.17  | 4.5%  |
| Ap4m1   | 4.607132   | 0.17  | 3.7%  |
| Ap4s1   | 18.71978   | 1.05  | 5.6%  |
| Apa1    | 0.4626408  | 0.20  | 42.2% |
| Apaf1   | 4.764464   | 0.41  | 8.6%  |
| Apba1   | 64.16326   | 4.77  | 7.4%  |
| Apba2   | 31.23422   | 2.07  | 6.6%  |
| Apba2bp | 5.383736   | 0.76  | 14.1% |
| Apba3   | 2.9054     | 0.33  | 11.3% |
| Apbb1   | 82.67004   | 3.42  | 4.1%  |
| Apbb1ip | 0.11312048 | 0.03  | 27.6% |
| Apbb2   | 12.15488   | 0.64  | 5.3%  |
| Apbb3   | 14.49216   | 0.90  | 6.2%  |
| Apbh    | 0          | 0.00  |       |
| Apc     | 28.78142   | 2.45  | 8.5%  |
| Apc2    | 26.02342   | 1.25  | 4.8%  |
| Apcdd1  | 2.075104   | 0.15  | 7.2%  |
| Apcs    | 0          | 0.00  |       |
| Apeh    | 14.5246    | 0.40  | 2.7%  |
| Apex1   | 7.478692   | 1.71  | 22.9% |
| Apex2   | 2.141978   | 0.11  | 5.2%  |
| APG16L  | 1.1053336  | 0.22  | 19.6% |
| apg-1b  | 0.0452663  | 0.01  | 23.2% |
| Aph1a   | 2.57082    | 0.17  | 6.5%  |
| Aph1b   | 5.347372   | 0.30  | 5.7%  |
| Aph1c   | 2.501948   | 0.34  | 13.4% |
| Api5    | 12.45598   | 0.42  | 3.4%  |
| Apip    | 8.445846   | 0.79  | 9.4%  |
| Apitd1  | 1.672682   | 0.20  | 12.0% |
| Apln    | 1.0637754  | 0.22  | 20.9% |
| Aplp1   | 196.151    | 10.61 | 5.4%  |
| Aplp2   | 211.371    | 4.38  | 2.1%  |
| APMAP   | 0.9101318  | 0.43  | 47.3% |
| apo     | 1.09912    | 0.43  | 39.0% |
| Apoa1   | 0.4279248  | 0.16  | 38.3% |

|             |            |       |        |
|-------------|------------|-------|--------|
| Apoa1bp     | 29.2388    | 1.64  | 5.6%   |
| Apoa2       | 0.01320876 | 0.03  | 223.6% |
| Apoa4       | 0          | 0.00  |        |
| Apoa5       | 0          | 0.00  |        |
| Apob        | 0.04136984 | 0.01  | 32.3%  |
| Apob48r     | 0.0982491  | 0.03  | 27.1%  |
| Apobec1     | 0.506543   | 0.05  | 10.4%  |
| Apobec2     | 0.00729016 | 0.02  | 223.6% |
| Apobec3     | 0.5554248  | 0.16  | 28.8%  |
| Apobec4     | 0          | 0.00  |        |
| Apoc1       | 0          | 0.00  |        |
| Apoc2       | 0.00717636 | 0.02  | 223.6% |
| Apoc3       | 0          | 0.00  |        |
| Apoc4       | 0          | 0.00  |        |
| Apod        | 4.29975    | 1.07  | 25.0%  |
| Apoe        | 39.8434    | 2.19  | 5.5%   |
| Apof        | 0          | 0.00  |        |
| Apoh        | 0.1937508  | 0.04  | 21.2%  |
| Apol2       | 0.1848908  | 0.06  | 30.8%  |
| Apol3       | 0.0228065  | 0.02  | 108.0% |
| Apol6       | 0.00638312 | 0.01  | 138.0% |
| Apom        | 0.03239902 | 0.04  | 110.9% |
| Apon        | 0.00756656 | 0.02  | 223.6% |
| Apool       | 2.091114   | 0.13  | 6.3%   |
| App         | 426.2766   | 14.94 | 3.5%   |
| Appbp1      | 18.93776   | 0.80  | 4.2%   |
| Appbp2      | 32.73848   | 0.93  | 2.9%   |
| Appl1       | 16.24572   | 1.18  | 7.3%   |
| Appl2       | 6.31332    | 0.75  | 12.0%  |
| Aprt        | 14.84988   | 1.16  | 7.8%   |
| aprt        | 0.588052   | 0.19  | 32.0%  |
| Aptx        | 5.690404   | 0.24  | 4.2%   |
| Aqp1        | 0.4809338  | 0.27  | 56.3%  |
| Aqp11       | 7.112948   | 0.56  | 7.8%   |
| Aqp12       | 0.00536448 | 0.01  | 223.6% |
| Aqp2        | 0          | 0.00  |        |
| Aqp3        | 0.0031651  | 0.01  | 223.6% |
| Aqp4        | 7.122618   | 1.03  | 14.5%  |
| Aqp5        | 0.6813324  | 0.21  | 31.3%  |
| Aqp6        | 0          | 0.00  |        |
| Aqp7        | 0.00295454 | 0.01  | 223.6% |
| Aqp8        | 2.804956   | 0.69  | 24.6%  |
| Aqp9        | 0.02362486 | 0.00  | 21.1%  |
| Aqr         | 8.142426   | 0.43  | 5.3%   |
| aquaporin_9 | 0.02122024 | 0.01  | 28.3%  |
| Ar          | 0.6212294  | 0.10  | 16.7%  |
| Araf        | 114.5742   | 2.32  | 2.0%   |

|           |             |       |        |
|-----------|-------------|-------|--------|
| Arbp      | 32.3405     | 4.13  | 12.8%  |
| Arc       | 0.9706446   | 0.25  | 25.7%  |
| Arcn1     | 34.23554    | 2.04  | 6.0%   |
| Ard1      | 11.428342   | 1.37  | 12.0%  |
| Ard1b     | 0.007685578 | 0.01  | 161.6% |
| Areg      | 0.02228092  | 0.02  | 100.0% |
| Arf1      | 102.70718   | 4.21  | 4.1%   |
| Arf2      | 32.56746    | 2.62  | 8.1%   |
| Arf3      | 243.5626    | 11.74 | 4.8%   |
| Arf4      | 69.76438    | 6.73  | 9.6%   |
| Arf5      | 56.03014    | 4.66  | 8.3%   |
| Arf6      | 14.1577     | 0.78  | 5.5%   |
| Arfgap1   | 23.78898    | 0.82  | 3.4%   |
| Arfgap3   | 8.503964    | 0.44  | 5.2%   |
| Arfgef1   | 26.99612    | 1.59  | 5.9%   |
| Arfgef2   | 10.747958   | 0.58  | 5.4%   |
| Arfip1    | 4.193236    | 0.18  | 4.3%   |
| Arfip2    | 24.39902    | 0.67  | 2.7%   |
| Arfrp1    | 14.64034    | 1.04  | 7.1%   |
| arg1      | 0.04230926  | 0.01  | 18.8%  |
| Arg1      | 0.03309022  | 0.02  | 54.0%  |
| Arg2      | 0.9162908   | 0.18  | 19.1%  |
| Arhgap1   | 14.53688    | 0.86  | 5.9%   |
| Arhgap10  | 1.648948    | 0.17  | 10.4%  |
| Arhgap11a | 1.446536    | 0.14  | 9.5%   |
| Arhgap12  | 18.90696    | 0.82  | 4.3%   |
| Arhgap15  | 0.0085141   | 0.02  | 223.6% |
| Arhgap17  | 1.331622    | 0.15  | 11.4%  |
| Arhgap18  | 1.562522    | 0.16  | 10.0%  |
| Arhgap19  | 0.792828    | 0.05  | 6.9%   |
| Arhgap20  | 13.65192    | 0.67  | 4.9%   |
| Arhgap21  | 14.53338    | 0.81  | 5.6%   |
| Arhgap22  | 0.4015746   | 0.03  | 7.6%   |
| Arhgap23  | 3.304568    | 0.41  | 12.3%  |
| Arhgap24  | 9.619554    | 1.42  | 14.8%  |
| Arhgap25  | 0.04906796  | 0.03  | 58.3%  |
| Arhgap26  | 10.33663    | 0.39  | 3.8%   |
| Arhgap27  | 0.8355604   | 0.20  | 24.4%  |
| Arhgap28  | 0.400701    | 0.02  | 4.3%   |
| Arhgap29  | 1.877762    | 0.23  | 12.1%  |
| Arhgap30  | 0.010722838 | 0.00  | 44.1%  |
| Arhgap4   | 0.1396625   | 0.17  | 124.8% |
| Arhgap5   | 22.99312    | 1.59  | 6.9%   |
| Arhgap6   | 0.6671728   | 0.18  | 26.4%  |
| Arhgap8   | 9.29298     | 0.77  | 8.3%   |
| Arhgap9   | 0.01108492  | 0.01  | 93.6%  |
| Arhgdia   | 140.2968    | 6.97  | 5.0%   |

|           |            |      |        |
|-----------|------------|------|--------|
| Arhgdib   | 1.438836   | 0.16 | 10.8%  |
| Arhgdig   | 42.54332   | 4.42 | 10.4%  |
| Arhgef1   | 10.406622  | 1.09 | 10.5%  |
| Arhgef10  | 1.328416   | 0.07 | 5.4%   |
| Arhgef10l | 9.69771    | 0.37 | 3.8%   |
| Arhgef11  | 20.03218   | 0.62 | 3.1%   |
| Arhgef12  | 15.5019    | 0.50 | 3.2%   |
| Arhgef15  | 1.179412   | 0.12 | 10.3%  |
| Arhgef16  | 0.265376   | 0.02 | 6.2%   |
| Arhgef17  | 15.77548   | 1.66 | 10.5%  |
| Arhgef18  | 7.674228   | 0.39 | 5.1%   |
| Arhgef19  | 0.13730648 | 0.03 | 19.4%  |
| Arhgef2   | 9.113656   | 0.31 | 3.5%   |
| Arhgef3   | 2.93075    | 0.17 | 5.6%   |
| Arhgef4   | 25.83266   | 1.66 | 6.4%   |
| Arhgef5   | 0.2195312  | 0.04 | 17.5%  |
| Arhgef6   | 2.596228   | 0.55 | 21.4%  |
| Arhgef7   | 30.16002   | 1.86 | 6.2%   |
| Arhgef9   | 33.05596   | 2.12 | 6.4%   |
| Ari2      | 1.981538   | 1.03 | 52.1%  |
| Arid1a    | 13.1906    | 0.25 | 1.9%   |
| Arid1b    | 8.435728   | 0.38 | 4.5%   |
| Arid2     | 8.697696   | 0.19 | 2.2%   |
| Arid3a    | 1.284912   | 0.12 | 9.2%   |
| Arid3b    | 0.3873694  | 0.05 | 14.0%  |
| Arid3c    | 0.05302694 | 0.02 | 34.2%  |
| Arid4a    | 5.915612   | 0.44 | 7.4%   |
| Arid4b    | 11.31942   | 0.54 | 4.8%   |
| Arid5a    | 1.0376924  | 0.11 | 10.7%  |
| Arid5b    | 5.676432   | 0.48 | 8.4%   |
| Arih1     | 18.31482   | 0.81 | 4.4%   |
| Arih2     | 5.616278   | 0.79 | 14.1%  |
| Arip2     | 16.04462   | 2.62 | 16.3%  |
| Arkadia   | 1.973906   | 0.28 | 14.4%  |
| Arl1      | 18.23526   | 0.77 | 4.2%   |
| Arl10     | 11.67696   | 0.76 | 6.5%   |
| Arl11     | 0.0368249  | 0.04 | 100.6% |
| Arl13a    | 0          | 0.00 |        |
| Arl13b    | 1.689766   | 0.27 | 16.0%  |
| Arl15     | 7.732168   | 0.65 | 8.5%   |
| Arl16     | 8.518244   | 0.67 | 7.9%   |
| Arl2      | 57.15882   | 2.64 | 4.6%   |
| Arl2bp    | 39.93102   | 1.85 | 4.6%   |
| Arl3      | 48.98676   | 1.75 | 3.6%   |
| Arl4a     | 11.15362   | 0.63 | 5.6%   |
| Arl4c     | 36.43482   | 1.07 | 2.9%   |
| Arl4d     | 0.9431258  | 0.20 | 21.3%  |

|         |             |       |        |
|---------|-------------|-------|--------|
| Arl5a   | 20.01738    | 0.59  | 3.0%   |
| Arl5b   | 8.543316    | 0.79  | 9.2%   |
| Arl5c   | 0.3090828   | 0.04  | 14.1%  |
| Arl6    | 14.4241     | 0.41  | 2.8%   |
| Arl6ip1 | 128.797     | 2.83  | 2.2%   |
| Arl6ip2 | 19.04298    | 0.76  | 4.0%   |
| Arl6ip4 | 23.65532    | 0.99  | 4.2%   |
| Arl6ip5 | 43.9786     | 0.99  | 2.3%   |
| Arl6ip6 | 4.184832    | 0.27  | 6.4%   |
| Arl8a   | 105.0335    | 10.04 | 9.6%   |
| Arl8b   | 102.6716    | 2.05  | 2.0%   |
| Arl9    | 0.01793844  | 0.04  | 223.6% |
| Armc1   | 25.2944     | 1.27  | 5.0%   |
| Armc10  | 4.883464    | 0.32  | 6.6%   |
| Armc2   | 0.4227722   | 0.05  | 11.2%  |
| Armc3   | 0.011786628 | 0.01  | 70.8%  |
| Armc4   | 0.07544954  | 0.04  | 55.6%  |
| Armc5   | 3.802796    | 0.22  | 5.9%   |
| Armc6   | 17.00466    | 1.90  | 11.2%  |
| Armc7   | 2.729918    | 0.34  | 12.6%  |
| Armc8   | 19.47678    | 1.23  | 6.3%   |
| Armc9   | 8.313068    | 1.16  | 13.9%  |
| Armcx1  | 44.49056    | 1.01  | 2.3%   |
| Armcx2  | 63.15018    | 2.47  | 3.9%   |
| Armcx3  | 9.693554    | 0.23  | 2.4%   |
| Armcx5  | 8.619164    | 0.69  | 8.0%   |
| Armcx6  | 10.478974   | 0.86  | 8.2%   |
| Armet   | 18.977      | 1.16  | 6.1%   |
| Armetl1 | 0.5756406   | 0.07  | 12.7%  |
| Arnt    | 2.965848    | 0.28  | 9.3%   |
| Arnt2   | 24.8528     | 1.31  | 5.3%   |
| Arntl   | 2.75741     | 0.17  | 6.1%   |
| Arntl2  | 0.3268192   | 0.08  | 24.3%  |
| Arpc1a  | 48.3995     | 3.53  | 7.3%   |
| Arpc1b  | 1.687582    | 0.40  | 23.4%  |
| Arpc2   | 60.8235     | 5.73  | 9.4%   |
| Arpc3   | 39.74844    | 2.27  | 5.7%   |
| Arpc4   | 50.47494    | 3.99  | 7.9%   |
| Arpc5   | 21.35396    | 3.64  | 17.0%  |
| Arpc5l  | 36.03056    | 0.98  | 2.7%   |
| Arpm1   | 0.7485168   | 0.09  | 12.1%  |
| Arpp19  | 32.20018    | 1.88  | 5.8%   |
| Arpp21  | 30.82852    | 1.41  | 4.6%   |
| Arr3    | 0           | 0.00  |        |
| Arrb1   | 33.27126    | 0.55  | 1.6%   |
| Arrb2   | 17.6744     | 1.05  | 6.0%   |
| Arrdc1  | 6.641632    | 0.42  | 6.3%   |

|        |             |      |        |
|--------|-------------|------|--------|
| Arrdc2 | 3.033004    | 0.38 | 12.7%  |
| Arrdc3 | 13.24684    | 0.57 | 4.3%   |
| Arrdc4 | 4.77443     | 0.67 | 14.1%  |
| Arrdc5 | 0           | 0.00 |        |
| Ars2   | 21.627      | 1.99 | 9.2%   |
| Arsa   | 10.860798   | 0.83 | 7.6%   |
| Arsb   | 6.579012    | 0.42 | 6.4%   |
| Arsg   | 4.504726    | 2.11 | 46.8%  |
| Arsi   | 0.1793418   | 0.08 | 44.0%  |
| Arsj   | 0.00941314  | 0.01 | 69.1%  |
| Arsk   | 1.187176    | 0.06 | 4.8%   |
| Art1   | 0.00568306  | 0.01 | 223.6% |
| Art2a  | 0           | 0.00 |        |
| Art2b  | 0           | 0.00 |        |
| art3   | 0.05487048  | 0.09 | 156.3% |
| Art3   | 0.05213524  | 0.02 | 36.1%  |
| Art4   | 0.01796446  | 0.01 | 46.3%  |
| Art5   | 0           | 0.00 |        |
| Artn   | 0.2280286   | 0.05 | 23.2%  |
| Arts1  | 1.891042    | 0.17 | 9.2%   |
| Arv1   | 5.049192    | 0.41 | 8.2%   |
| Arvcf  | 10.005984   | 0.72 | 7.2%   |
| Arx    | 0.11669682  | 0.03 | 23.9%  |
| As3mt  | 0.2207976   | 0.08 | 36.0%  |
| Asah1  | 30.7752     | 1.61 | 5.2%   |
| Asah2  | 6.301134    | 1.25 | 19.8%  |
| Asah3  | 0.00289234  | 0.01 | 223.6% |
| Asah3l | 0.10295624  | 0.04 | 42.9%  |
| Asahl  | 2.35755     | 0.24 | 10.0%  |
| Asb1   | 9.687738    | 1.03 | 10.7%  |
| Asb10  | 0.00405546  | 0.01 | 223.6% |
| Asb11  | 0.00468444  | 0.01 | 223.6% |
| Asb12  | 0.0119817   | 0.02 | 139.1% |
| Asb13  | 24.90614    | 1.65 | 6.6%   |
| Asb14  | 0.04554134  | 0.03 | 73.1%  |
| Asb15  | 0.02047354  | 0.03 | 128.9% |
| Asb16  | 0.38632     | 0.07 | 18.9%  |
| Asb17  | 0.00567282  | 0.01 | 223.6% |
| Asb18  | 0.2001744   | 0.07 | 36.1%  |
| Asb2   | 0.027414988 | 0.03 | 98.6%  |
| Asb3   | 5.43136     | 0.41 | 7.6%   |
| Asb4   | 0.3884746   | 0.08 | 20.3%  |
| Asb5   | 0.6882816   | 0.07 | 10.6%  |
| Asb6   | 8.911228    | 0.76 | 8.5%   |
| Asb7   | 3.128564    | 0.41 | 13.1%  |
| Asb8   | 23.95632    | 1.50 | 6.3%   |
| Asb9   | 0.00477266  | 0.01 | 223.6% |

|         |            |      |        |
|---------|------------|------|--------|
| Ascc1   | 14.56412   | 1.02 | 7.0%   |
| Ascc2   | 4.324684   | 0.19 | 4.3%   |
| Ascc3   | 4.891338   | 0.43 | 8.8%   |
| Ascc3l1 | 15.99318   | 0.77 | 4.8%   |
| Ascl1   | 1.567278   | 0.20 | 12.8%  |
| Ascl2   | 0.13490596 | 0.06 | 41.0%  |
| Ascl3   | 0.0448244  | 0.01 | 22.7%  |
| Asf1a   | 5.48503    | 0.34 | 6.3%   |
| Asf1b   | 1.226982   | 0.16 | 12.8%  |
| Asgr1   | 0.03731914 | 0.03 | 70.0%  |
| Asgr2   | 0          | 0.00 |        |
| Ash1l   | 7.823546   | 0.54 | 6.9%   |
| Ash2l   | 14.49248   | 0.93 | 6.4%   |
| ASK2    | 0.0276251  | 0.02 | 62.5%  |
| Asl     | 5.457048   | 0.14 | 2.5%   |
| Asna1   | 39.82918   | 1.85 | 4.7%   |
| Asns    | 72.15838   | 8.41 | 11.7%  |
| Asnsd1  | 15.00458   | 1.74 | 11.6%  |
| Asp     | 0.02441154 | 0.01 | 36.8%  |
| asp3    | 0.3129554  | 0.28 | 87.9%  |
| asp4    | 0.34418666 | 0.15 | 44.8%  |
| Aspa    | 0.5646882  | 0.08 | 13.6%  |
| Asph    | 39.99618   | 0.78 | 1.9%   |
| Asphd1  | 18.9807    | 1.58 | 8.3%   |
| Asphd2  | 16.26986   | 0.43 | 2.6%   |
| Aspm    | 0.3405322  | 0.08 | 24.8%  |
| Aspn    | 7.780642   | 1.62 | 20.8%  |
| Asprv1  | 0.22692818 | 0.09 | 39.0%  |
| Aspscr1 | 21.48688   | 1.10 | 5.1%   |
| Asrgl1  | 15.3415    | 1.23 | 8.0%   |
| Ass1    | 1.221238   | 0.11 | 8.8%   |
| Aste1   | 1.475526   | 0.08 | 5.5%   |
| Astl    | 0.00224498 | 0.01 | 223.6% |
| Astn1   | 43.7472    | 1.52 | 3.5%   |
| Astn2   | 14.4323    | 0.57 | 3.9%   |
| Asxl1   | 6.751888   | 0.30 | 4.4%   |
| Asxl2   | 3.516718   | 0.21 | 5.9%   |
| Asxl3   | 1.958876   | 0.27 | 13.6%  |
| Asz1    | 0.00430862 | 0.01 | 223.6% |
| Atad1   | 69.6805    | 2.09 | 3.0%   |
| Atad2   | 1.226206   | 0.15 | 11.8%  |
| Atad2b  | 4.087044   | 0.17 | 4.1%   |
| Atad3a  | 7.07936    | 0.35 | 5.0%   |
| Atad4   | 0.09748348 | 0.02 | 18.5%  |
| Atad5   | 1.1352     | 0.07 | 6.2%   |
| Atcay   | 53.46124   | 1.64 | 3.1%   |
| Ate1    | 22.08056   | 1.25 | 5.7%   |

|         |             |       |        |
|---------|-------------|-------|--------|
| Atf1    | 2.090956    | 0.18  | 8.7%   |
| Atf2    | 35.2545     | 1.69  | 4.8%   |
| Atf3    | 3.463118    | 0.62  | 18.0%  |
| Atf4    | 90.61412    | 8.96  | 9.9%   |
| Atf5    | 14.8562     | 2.42  | 16.3%  |
| Atf6    | 6.824776    | 0.39  | 5.7%   |
| Atf7    | 2.515774    | 0.19  | 7.7%   |
| Atf7ip  | 7.0343      | 0.27  | 3.8%   |
| Atf7ip2 | 0.00946814  | 0.01  | 138.9% |
| Atg10   | 4.719384    | 0.26  | 5.6%   |
| Atg12   | 57.68224    | 2.81  | 4.9%   |
| Atg16l1 | 13.73864    | 0.48  | 3.5%   |
| Atg16l2 | 2.813708    | 0.27  | 9.5%   |
| Atg2a   | 9.792428    | 0.56  | 5.7%   |
| Atg2b   | 9.024872    | 0.59  | 6.6%   |
| Atg3    | 15.66488    | 0.76  | 4.8%   |
| Atg4a   | 0.4835018   | 0.07  | 15.2%  |
| Atg4b   | 19.84442    | 0.48  | 2.4%   |
| Atg4c   | 11.39294    | 0.45  | 3.9%   |
| Atg4d   | 9.47974     | 0.55  | 5.8%   |
| Atg5    | 9.20027     | 0.29  | 3.1%   |
| Atg7    | 5.354632    | 0.30  | 5.6%   |
| Atg9    | 2.0353406   | 0.84  | 41.1%  |
| Atg9a   | 42.65876    | 0.95  | 2.2%   |
| Atg9b   | 1.551178    | 0.18  | 11.3%  |
| Ath11   | 0.8318564   | 0.11  | 13.1%  |
| Atic    | 9.179184    | 0.80  | 8.8%   |
| Atm     | 1.934276    | 0.24  | 12.3%  |
| Atn1    | 41.66128    | 1.92  | 4.6%   |
| Atoh1   | 0.11006766  | 0.05  | 46.0%  |
| Atoh7   | 0.1950468   | 0.08  | 38.5%  |
| Atoh8   | 0.1153112   | 0.05  | 41.8%  |
| Atox1   | 67.71006    | 6.23  | 9.2%   |
| Atp10a  | 0.8362734   | 0.08  | 9.3%   |
| Atp10b  | 0.011440726 | 0.01  | 69.1%  |
| Atp10d  | 0.934691    | 0.25  | 26.5%  |
| Atp11a  | 10.35644    | 0.30  | 2.9%   |
| Atp11b  | 42.97018    | 4.83  | 11.2%  |
| Atp11c  | 7.091306    | 0.25  | 3.6%   |
| Atp12a  | 0.02358914  | 0.01  | 41.5%  |
| Atp13a1 | 13.33288    | 0.16  | 1.2%   |
| Atp13a2 | 76.48256    | 3.23  | 4.2%   |
| Atp13a4 | 0.704639    | 0.19  | 26.8%  |
| Atp13a5 | 0.017804402 | 0.01  | 39.3%  |
| Atp1a1  | 62.87256    | 3.25  | 5.2%   |
| Atp1a2  | 28.27176    | 2.60  | 9.2%   |
| Atp1a3  | 974.394     | 57.57 | 5.9%   |



|          |             |       |        |
|----------|-------------|-------|--------|
| Atp1b1   | 681.843     | 24.37 | 3.6%   |
| Atp1b2   | 69.53864    | 5.82  | 8.4%   |
| Atp1b3   | 27.13962    | 2.32  | 8.5%   |
| Atp1b4   | 0.00186074  | 0.00  | 223.6% |
| Atp2a1   | 0.02216362  | 0.02  | 105.0% |
| Atp2a2   | 147.0924    | 1.81  | 1.2%   |
| Atp2a3   | 0.08184304  | 0.01  | 10.1%  |
| Atp2b1   | 47.73796    | 3.43  | 7.2%   |
| Atp2b2   | 30.23348    | 1.72  | 5.7%   |
| Atp2b3   | 22.62638    | 1.35  | 6.0%   |
| Atp2b4   | 15.6017     | 1.27  | 8.1%   |
| Atp2c1   | 20.7149     | 0.96  | 4.6%   |
| Atp4a    | 0.335591    | 0.08  | 23.8%  |
| Atp4b    | 0           | 0.00  |        |
| Atp5a1   | 416.0366    | 10.11 | 2.4%   |
| Atp5b    | 569.8456    | 11.79 | 2.1%   |
| Atp5c1   | 91.00316    | 3.74  | 4.1%   |
| Atp5d    | 114.0988    | 3.45  | 3.0%   |
| Atp5e    | 91.5677     | 5.97  | 6.5%   |
| Atp5f1   | 88.05356    | 3.27  | 3.7%   |
| Atp5g1   | 14.27316    | 1.05  | 7.4%   |
| Atp5g2   | 0.1527994   | 0.04  | 28.2%  |
| Atp5g3   | 323.2932    | 15.99 | 4.9%   |
| Atp5h    | 10.082016   | 0.79  | 7.9%   |
| Atp5j    | 75.73316    | 8.18  | 10.8%  |
| Atp5j2   | 83.8025     | 4.80  | 5.7%   |
| Atp5k    | 28.2595     | 1.70  | 6.0%   |
| Atp5l    | 4.550444    | 1.00  | 22.0%  |
| Atp5o    | 77.87972    | 6.99  | 9.0%   |
| Atp5s    | 14.79748    | 0.64  | 4.3%   |
| Atp6ap1  | 169.327     | 3.98  | 2.3%   |
| Atp6ap2  | 151.6746    | 6.84  | 4.5%   |
| Atp6c2   | 0.01009554  | 0.01  | 115.8% |
| Atp6v0a1 | 166.7228    | 5.71  | 3.4%   |
| Atp6v0a2 | 8.73174     | 0.64  | 7.3%   |
| Atp6v0a4 | 0.8067518   | 0.49  | 61.2%  |
| Atp6v0b  | 141.3212    | 6.56  | 4.6%   |
| Atp6v0c  | 220.0258    | 8.48  | 3.9%   |
| Atp6v0d1 | 135.9836    | 9.23  | 6.8%   |
| Atp6v0d2 | 0           | 0.00  |        |
| Atp6v0e  | 9.046116    | 0.65  | 7.2%   |
| Atp6v0e2 | 216.902     | 13.19 | 6.1%   |
| Atp6v1a  | 137.218     | 2.39  | 1.7%   |
| Atp6v1b1 | 0.0240088   | 0.03  | 112.3% |
| Atp6v1b2 | 288.8432    | 5.05  | 1.7%   |
| Atp6v1c1 | 128.708     | 2.09  | 1.6%   |
| Atp6v1c2 | 0.031367718 | 0.02  | 69.3%  |

|          |             |       |        |
|----------|-------------|-------|--------|
| Atp6v1d  | 78.92774    | 1.35  | 1.7%   |
| Atp6v1e1 | 172.3334    | 4.30  | 2.5%   |
| Atp6v1e2 | 0.01195852  | 0.02  | 138.6% |
| Atp6v1f  | 52.61584    | 2.32  | 4.4%   |
| Atp6v1g1 | 26.31142    | 2.21  | 8.4%   |
| Atp6v1g2 | 152.1878    | 7.97  | 5.2%   |
| Atp6v1g3 | 0           | 0.00  |        |
| Atp6v1h  | 71.99206    | 1.95  | 2.7%   |
| Atp7a    | 1.2206184   | 0.15  | 12.3%  |
| Atp7b    | 0.6450472   | 0.16  | 25.0%  |
| Atp8a1   | 32.23668    | 0.95  | 3.0%   |
| Atp8a2   | 14.42202    | 0.84  | 5.8%   |
| Atp8b1   | 0.2067232   | 0.05  | 26.3%  |
| Atp8b2   | 17.99464    | 0.80  | 4.5%   |
| Atp8b3   | 0.10534668  | 0.03  | 25.2%  |
| Atp8b4   | 0.002675786 | 0.00  | 137.7% |
| Atp9a    | 139.5974    | 7.60  | 5.4%   |
| Atp9b    | 7.53515     | 0.66  | 8.8%   |
| Atpaf1   | 2.971966    | 0.44  | 14.7%  |
| Atpaf2   | 10.04709    | 0.18  | 1.7%   |
| Atpase6  | 0.10293648  | 0.08  | 79.5%  |
| Atpbd1b  | 2.846114    | 0.17  | 5.9%   |
| Atpbd1c  | 8.178638    | 0.65  | 8.0%   |
| Atpbd3   | 3.22808     | 0.45  | 14.0%  |
| Atpbd4   | 8.565176    | 0.28  | 3.3%   |
| Atpif1   | 118.334     | 11.20 | 9.5%   |
| Atr      | 1.272152    | 0.28  | 22.1%  |
| Atrn     | 21.4618     | 0.80  | 3.7%   |
| Atrnl1   | 14.5466     | 0.38  | 2.6%   |
| Atrx     | 17.53042    | 1.08  | 6.2%   |
| Atxn1    | 3.172756    | 0.40  | 12.7%  |
| Atxn10   | 177.1926    | 3.67  | 2.1%   |
| Atxn2    | 30.57914    | 1.23  | 4.0%   |
| Atxn2l   | 42.03764    | 1.55  | 3.7%   |
| Atxn3    | 5.693942    | 0.52  | 9.2%   |
| Atxn7    | 1.963544    | 0.29  | 14.6%  |
| Atxn7l1  | 2.020766    | 0.06  | 2.9%   |
| Atxn7l2  | 2.581756    | 0.22  | 8.4%   |
| Atxn7l3  | 52.9535     | 2.11  | 4.0%   |
| Atxn7l4  | 7.826558    | 0.43  | 5.5%   |
| AU014645 | 18.857      | 1.04  | 5.5%   |
| AU015228 | 0.04544096  | 0.03  | 55.7%  |
| AU017455 | 0.09971522  | 0.03  | 30.2%  |
| AU018091 | 0.00286926  | 0.01  | 223.6% |
| AU018778 | 0.0042826   | 0.01  | 223.6% |
| AU018829 | 0           | 0.00  |        |
| AU019823 | 4.703872    | 0.32  | 6.7%   |

|          |             |      |        |
|----------|-------------|------|--------|
| AU020772 | 2.555396    | 0.15 | 5.9%   |
| AU021034 | 0.0032178   | 0.01 | 223.6% |
| AU021092 | 0           | 0.00 |        |
| AU021838 | 14.55236    | 1.24 | 8.5%   |
| AU022252 | 6.39508     | 0.38 | 5.9%   |
| AU022751 | 0.01188734  | 0.01 | 103.0% |
| AU022870 | 12.59306    | 0.65 | 5.1%   |
| AU023871 | 0           | 0.00 |        |
| AU040320 | 13.21638    | 0.29 | 2.2%   |
| AU040829 | 30.9756     | 1.28 | 4.1%   |
| AU042651 | 0.01122404  | 0.02 | 139.6% |
| AU042671 | 21.09724    | 1.34 | 6.3%   |
| Auh      | 30.3143     | 1.73 | 5.7%   |
| Aup1     | 18.98036    | 1.26 | 6.6%   |
| Aurka    | 0.8372954   | 0.13 | 16.1%  |
| Aurkaip1 | 36.52844    | 2.48 | 6.8%   |
| Aurkb    | 0.6833688   | 0.19 | 28.3%  |
| Aurkc    | 0.00943036  | 0.01 | 138.8% |
| Auts2    | 23.176      | 1.21 | 5.2%   |
| av       | 0.31271954  | 0.17 | 53.8%  |
| AV249152 | 1.37592     | 0.18 | 12.9%  |
| AV312086 | 7.634396    | 0.23 | 3.0%   |
| AV340375 | 0.08016294  | 0.03 | 37.8%  |
| Av381126 | 0.00813066  | 0.02 | 223.6% |
| Aven     | 2.94689     | 0.53 | 18.1%  |
| Avil     | 0.5950566   | 0.08 | 13.4%  |
| Avp      | 0           | 0.00 |        |
| Avpi1    | 7.413454    | 1.45 | 19.5%  |
| Avpr1a   | 1.1150792   | 0.26 | 23.2%  |
| Avpr1b   | 0           | 0.00 |        |
| Avpr2    | 0.942098    | 0.34 | 36.2%  |
| AW049604 | 64.89492    | 4.96 | 7.6%   |
| AW061290 | 1.628162    | 0.18 | 11.3%  |
| AW124722 | 1.359224    | 0.13 | 9.3%   |
| AW125753 | 14.6965     | 1.21 | 8.2%   |
| AW146020 | 0.9297274   | 0.28 | 29.9%  |
| AW146154 | 1.567038    | 0.18 | 11.8%  |
| AW146242 | 20.20354    | 1.32 | 6.5%   |
| AW146299 | 0           | 0.00 |        |
| AW209491 | 6.1101      | 0.37 | 6.0%   |
| AW456874 | 0.1583144   | 0.05 | 30.9%  |
| AW491445 | 0.03635984  | 0.02 | 46.8%  |
| AW544981 | 0.001652216 | 0.00 | 223.6% |
| AW548124 | 4.210066    | 0.39 | 9.2%   |
| AW549877 | 39.6891     | 2.37 | 6.0%   |
| AW551984 | 57.33956    | 4.68 | 8.2%   |
| AW554918 | 6.517416    | 0.52 | 8.0%   |

|          |             |      |        |
|----------|-------------|------|--------|
| AW555464 | 34.37562    | 1.07 | 3.1%   |
| Awp1     | 0.9509364   | 0.24 | 25.4%  |
| Axin1    | 4.850448    | 0.15 | 3.1%   |
| Axin2    | 3.586916    | 0.50 | 13.9%  |
| Axl      | 1.302704    | 0.19 | 14.3%  |
| Axud1    | 0.3669824   | 0.07 | 20.3%  |
| AY026312 | 0           | 0.00 |        |
| AY053573 | 0.03510436  | 0.03 | 75.2%  |
| AY074887 | 0.241392    | 0.09 | 36.4%  |
| AY078069 | 0.4494554   | 0.09 | 19.7%  |
| AY096003 | 0.03089996  | 0.03 | 110.6% |
| AY139115 | 0           | 0.00 |        |
| AY227025 | 0.4894704   | 0.23 | 46.1%  |
| AY227026 | 0.794394    | 0.23 | 28.4%  |
| AY227735 | 0           | 0.00 |        |
| AY255546 | 9.43594     | 1.53 | 16.2%  |
| AY255578 | 0.052958    | 0.07 | 139.1% |
| AY324401 | 0           | 0.00 |        |
| AY358078 | 0.4009148   | 0.12 | 30.0%  |
| AY512908 | 0           | 0.00 |        |
| AY512909 | 0           | 0.00 |        |
| AY512910 | 0.01250258  | 0.01 | 102.6% |
| AY512912 | 0.03166338  | 0.02 | 63.7%  |
| AY512915 | 0           | 0.00 |        |
| AY512917 | 0           | 0.00 |        |
| AY512931 | 0.0037354   | 0.01 | 223.6% |
| AY512935 | 0           | 0.00 |        |
| AY512941 | 0.00269618  | 0.01 | 223.6% |
| AY512942 | 0.2232764   | 0.09 | 39.8%  |
| AY512943 | 0.00244722  | 0.01 | 223.6% |
| AY589788 | 0.2022964   | 0.07 | 33.8%  |
| AY589789 | 0.004119864 | 0.01 | 181.4% |
| AY589791 | 0           | 0.00 |        |
| AY590888 | 0           | 0.00 |        |
| AY616753 | 0.0121481   | 0.02 | 141.4% |
| AY672066 | 0.839334    | 0.58 | 69.3%  |
| AY761184 | 0.0254368   | 0.06 | 223.6% |
| AY761185 | 0           | 0.00 |        |
| AY940615 | 0           | 0.00 |        |
| AY940618 | 0           | 0.00 |        |
| Aym1     | 0           | 0.00 |        |
| Aytl1a   | 0.351097    | 0.09 | 25.9%  |
| Aytl1b   | 0.00258464  | 0.01 | 223.6% |
| Aytl2    | 18.39784    | 2.29 | 12.5%  |
| AZ2      | 1.479248    | 0.27 | 18.1%  |
| Azgp1    | 0.004187    | 0.01 | 223.6% |
| Azi1     | 5.93219     | 0.13 | 2.2%   |

|               |            |      |        |
|---------------|------------|------|--------|
| Azi2          | 19.0863    | 0.32 | 1.7%   |
| Azin1         | 67.88366   | 6.61 | 9.7%   |
| B020004J07Rik | 0          | 0.00 |        |
| B020006M18Rik | 0.0027981  | 0.01 | 223.6% |
| B020018G12Rik | 8.697638   | 0.87 | 10.1%  |
| B020031M17Rik | 0          | 0.00 |        |
| B130050I23Rik | 37.72496   | 0.87 | 2.3%   |
| B144          | 0.05608196 | 0.05 | 97.2%  |
| B230112C05Rik | 16.17136   | 0.86 | 5.3%   |
| B230118G17Rik | 5.735818   | 0.54 | 9.4%   |
| B230118H07Rik | 6.00182    | 0.17 | 2.9%   |
| B230120H23Rik | 1.515234   | 0.16 | 10.5%  |
| B230206H07Rik | 0.0127005  | 0.02 | 179.3% |
| B230208H17Rik | 19.04458   | 1.49 | 7.8%   |
| B230209C24Rik | 94.50008   | 5.26 | 5.6%   |
| B230217C12Rik | 19.41836   | 1.08 | 5.6%   |
| B230218L05Rik | 0.13185596 | 0.05 | 34.3%  |
| B230219D22Rik | 35.99062   | 2.19 | 6.1%   |
| B230312A22Rik | 8.728962   | 0.58 | 6.7%   |
| B230312I18Rik | 3.187836   | 0.23 | 7.3%   |
| B230315F11Rik | 2.528162   | 0.81 | 32.0%  |
| B230315N10Rik | 8.610742   | 0.47 | 5.4%   |
| B230317C12Rik | 30.43686   | 1.98 | 6.5%   |
| B230339M05Rik | 16.21024   | 0.83 | 5.1%   |
| B230340J04Rik | 1.0249278  | 0.12 | 11.2%  |
| B230342M21Rik | 12.98098   | 1.14 | 8.8%   |
| B230354K17Rik | 1.699524   | 0.34 | 20.1%  |
| B230358A15Rik | 0          | 0.00 |        |
| B230363K08Rik | 0.12743118 | 0.06 | 47.1%  |
| B230380D07Rik | 11.60076   | 0.91 | 7.9%   |
| B230396O12Rik | 1.0100842  | 0.09 | 8.9%   |
| B230399E16Rik | 0.8980514  | 0.11 | 12.2%  |
| B230399H06Rik | 0          | 0.00 |        |
| B2m           | 31.9204    | 2.58 | 8.1%   |
| B3bp          | 2.780194   | 0.22 | 7.9%   |
| B3galnt1      | 30.30052   | 1.66 | 5.5%   |
| B3galnt2      | 2.987056   | 0.20 | 6.6%   |
| B3galt1       | 14.69316   | 0.66 | 4.5%   |
| B3galt2       | 8.601032   | 0.46 | 5.4%   |
| B3galt4       | 2.588914   | 0.18 | 6.8%   |
| B3galt5       | 8.499696   | 1.23 | 14.4%  |
| B3galt6       | 4.609944   | 0.30 | 6.4%   |
| B3galtl       | 4.298848   | 0.34 | 7.8%   |
| B3gat1        | 39.03182   | 1.90 | 4.9%   |
| B3gat2        | 8.221596   | 0.60 | 7.3%   |
| B3gat3        | 70.78196   | 2.84 | 4.0%   |
| B3gnt1        | 67.4302    | 4.40 | 6.5%   |

|               |             |      |        |
|---------------|-------------|------|--------|
| B3gnt2        | 11.22266    | 1.36 | 12.1%  |
| B3gnt3        | 0.10265958  | 0.01 | 14.0%  |
| B3gnt4        | 0.2309208   | 0.08 | 33.3%  |
| B3gnt5        | 1.0102558   | 0.25 | 24.3%  |
| B3gnt6        | 0.2200998   | 0.03 | 13.7%  |
| B3gnt7        | 1.159567    | 0.22 | 19.3%  |
| B3gnt8        | 0.09700508  | 0.03 | 28.9%  |
| B3gntI1       | 3.308096    | 1.91 | 57.6%  |
| B430006D22Rik | 2.060748    | 0.25 | 11.9%  |
| B430119L13Rik | 0.2297518   | 0.08 | 33.9%  |
| B430203M17Rik | 0.204303    | 0.11 | 52.5%  |
| B430211C08Rik | 0.5075222   | 0.06 | 11.7%  |
| B430306N03Rik | 0.001029658 | 0.00 | 223.6% |
| B4galnt1      | 37.41106    | 3.53 | 9.4%   |
| B4galnt2      | 0.5938136   | 0.17 | 29.0%  |
| B4galnt3      | 0.1580594   | 0.03 | 22.1%  |
| B4galnt4      | 19.81662    | 1.20 | 6.0%   |
| B4galt1       | 2.207546    | 0.32 | 14.4%  |
| B4galt2       | 15.63578    | 1.63 | 10.4%  |
| B4galt3       | 9.446806    | 0.69 | 7.3%   |
| B4galt4       | 5.017726    | 0.16 | 3.3%   |
| B4galt5       | 20.48636    | 2.49 | 12.2%  |
| B4galt6       | 40.43598    | 1.06 | 2.6%   |
| B4galt7       | 12.8345     | 0.67 | 5.2%   |
| B630005N14Rik | 10.343122   | 0.35 | 3.4%   |
| B630019A10Rik | 0.05716046  | 0.03 | 55.1%  |
| B630019K06Rik | 36.2145     | 2.26 | 6.2%   |
| B830028B13Rik | 1.552492    | 0.21 | 13.6%  |
| B830045N13Rik | 6.264708    | 0.51 | 8.2%   |
| B930006L02Rik | 54.52166    | 1.93 | 3.5%   |
| B930007L02Rik | 3.31079     | 0.37 | 11.2%  |
| B930007M17Rik | 0.0187266   | 0.02 | 91.4%  |
| B930011P16Rik | 0.05281582  | 0.03 | 65.3%  |
| B930037P14Rik | 46.5865     | 0.48 | 1.0%   |
| B930041F14Rik | 14.10502    | 0.45 | 3.2%   |
| B930095G15Rik | 3.58979     | 0.37 | 10.4%  |
| B9d1          | 6.22017     | 1.11 | 17.8%  |
| B9d2          | 8.580848    | 0.78 | 9.1%   |
| Baalc         | 12.02044    | 1.02 | 8.5%   |
| Baat          | 0.03864764  | 0.01 | 34.2%  |
| Bace          | 4.643382    | 1.46 | 31.4%  |
| Bace1         | 19.27728    | 1.66 | 8.6%   |
| Bace2         | 1.477048    | 0.28 | 19.0%  |
| Bach1         | 5.463014    | 0.33 | 6.1%   |
| Bach2         | 1.513246    | 0.13 | 8.8%   |
| Bad           | 23.48794    | 2.81 | 12.0%  |
| Bag1          | 42.9768     | 2.21 | 5.2%   |

|          |            |       |        |
|----------|------------|-------|--------|
| Bag2     | 5.801986   | 0.42  | 7.3%   |
| Bag3     | 1.365878   | 0.21  | 15.6%  |
| Bag4     | 12.0288    | 0.67  | 5.6%   |
| Bag5     | 11.94798   | 0.46  | 3.9%   |
| Bahcc1   | 2.730382   | 0.20  | 7.4%   |
| Bahd1    | 5.140342   | 0.27  | 5.2%   |
| Bai1     | 41.28892   | 0.92  | 2.2%   |
| Bai2     | 34.20248   | 0.77  | 2.3%   |
| Bai3     | 19.49944   | 0.97  | 5.0%   |
| Baiap2   | 6.09118    | 0.44  | 7.3%   |
| Baiap2l1 | 0.241909   | 0.05  | 20.9%  |
| Baiap2l2 | 0.6322026  | 0.06  | 9.9%   |
| Baiap3   | 0.9676702  | 0.21  | 21.6%  |
| Bak1     | 10.50284   | 1.40  | 13.3%  |
| Bambi    | 0.7683048  | 0.07  | 9.3%   |
| Banf1    | 42.37466   | 4.92  | 11.6%  |
| Bank1    | 0.00476846 | 0.01  | 142.7% |
| Banp     | 3.671096   | 0.25  | 6.8%   |
| Bap1     | 31.34902   | 1.01  | 3.2%   |
| Bara     | 0.6031336  | 0.06  | 10.7%  |
| Bard1    | 0.7957842  | 0.12  | 14.7%  |
| Barhl1   | 5.285682   | 1.48  | 28.0%  |
| Barhl2   | 1.981704   | 0.40  | 20.3%  |
| Barx1    | 1.371278   | 0.18  | 13.4%  |
| Barx2    | 0.05249284 | 0.03  | 63.8%  |
| Basp1    | 296.3142   | 23.45 | 7.9%   |
| Bat1a    | 70.28548   | 3.40  | 4.8%   |
| Bat2     | 42.44946   | 1.29  | 3.0%   |
| Bat2d    | 29.22      | 1.40  | 4.8%   |
| Bat3     | 64.16718   | 2.89  | 4.5%   |
| Bat4     | 2.961668   | 0.35  | 11.8%  |
| Bat5     | 19.51866   | 0.67  | 3.5%   |
| Batf     | 0.00437136 | 0.01  | 223.6% |
| Batf2    | 0.00807978 | 0.01  | 140.8% |
| Bax      | 26.1362    | 2.27  | 8.7%   |
| Baz1a    | 0.214527   | 0.04  | 20.8%  |
| Baz1b    | 12.73832   | 0.57  | 4.5%   |
| Baz2a    | 9.309664   | 1.22  | 13.1%  |
| Baz2b    | 6.476676   | 0.62  | 9.6%   |
| BB014433 | 0          | 0.00  |        |
| BB146404 | 0.01380132 | 0.03  | 223.6% |
| BB220380 | 0.00665461 | 0.01  | 98.8%  |
| Bbc3     | 6.88596    | 0.31  | 4.6%   |
| Bbox1    | 0.05485542 | 0.05  | 83.2%  |
| Bbs1     | 8.92165    | 0.20  | 2.3%   |
| Bbs12    | 0.9594258  | 0.23  | 23.7%  |
| Bbs2     | 7.496396   | 0.82  | 10.9%  |

|          |            |      |       |
|----------|------------|------|-------|
| Bbs4     | 15.04206   | 0.49 | 3.3%  |
| Bbs5     | 5.963606   | 0.62 | 10.4% |
| Bbs7     | 7.876944   | 0.45 | 5.7%  |
| Bbs9     | 4.479118   | 0.14 | 3.1%  |
| Bbx      | 2.823064   | 0.24 | 8.5%  |
| BC002059 | 1.472694   | 0.12 | 8.4%  |
| BC002163 | 82.62706   | 4.84 | 5.9%  |
| BC002199 | 25.1911    | 1.66 | 6.6%  |
| BC002216 | 13.36638   | 0.36 | 2.7%  |
| BC002230 | 2.124108   | 0.12 | 5.7%  |
| BC002288 | 0.06647494 | 0.03 | 45.2% |
| BC002310 | 4.138362   | 0.30 | 7.2%  |
| BC002320 | 0.668716   | 0.59 | 88.8% |
| BC003266 | 17.76688   | 1.65 | 9.3%  |
| BC003267 | 5.859348   | 0.49 | 8.3%  |
| BC003324 | 3.139044   | 0.40 | 12.7% |
| BC003331 | 12.2301    | 0.72 | 5.9%  |
| BC003348 | 29.19028   | 1.09 | 3.7%  |
| BC003885 | 10.87955   | 0.93 | 8.6%  |
| BC003940 | 43.00226   | 3.64 | 8.5%  |
| BC003993 | 2.349676   | 0.24 | 10.3% |
| BC004004 | 15.41924   | 1.27 | 8.2%  |
| BC004022 | 8.202394   | 0.56 | 6.9%  |
| BC004044 | 11.28238   | 0.67 | 6.0%  |
| BC004728 | 0.298251   | 0.07 | 25.0% |
| BC005537 | 46.31426   | 3.38 | 7.3%  |
| BC005561 | 1.3062352  | 0.35 | 26.8% |
| BC005624 | 11.03006   | 0.65 | 5.9%  |
| BC005764 | 56.05518   | 3.04 | 5.4%  |
| BC005803 | 11.69976   | 0.73 | 6.3%  |
| BC006662 | 9.308492   | 0.83 | 8.9%  |
| BC006779 | 0.4089074  | 0.09 | 22.9% |
| BC006885 | 11.18668   | 0.29 | 2.6%  |
| BC006965 | 0.0708591  | 0.04 | 60.2% |
| BC008155 | 22.21362   | 1.86 | 8.4%  |
| BC008163 | 3.772288   | 0.30 | 8.1%  |
| BC009120 | 2.127676   | 0.29 | 13.5% |
| BC010304 | 16.39594   | 0.89 | 5.5%  |
| BC010787 | 12.32118   | 1.93 | 15.7% |
| BC011248 | 7.185536   | 0.68 | 9.5%  |
| BC011383 | 0.7839638  | 0.23 | 28.7% |
| BC011426 | 2.251752   | 0.17 | 7.5%  |
| BC011467 | 10.92786   | 0.94 | 8.6%  |
| BC011487 | 0.5591076  | 0.02 | 4.0%  |
| BC012278 | 2.4031     | 0.39 | 16.4% |
| BC012717 | 0.5631096  | 0.19 | 33.5% |
| BC013481 | 0.2103174  | 0.05 | 24.5% |



|          |             |      |        |
|----------|-------------|------|--------|
| BC013491 | 0.06580014  | 0.05 | 72.1%  |
| BC013529 | 6.106832    | 0.38 | 6.2%   |
| BC013672 | 0.021937428 | 0.02 | 94.8%  |
| BC013712 | 0           | 0.00 |        |
| BC014805 | 0           | 0.00 |        |
| BC015286 | 0.00265734  | 0.01 | 223.6% |
| BC016201 | 0           | 0.00 |        |
| BC016423 | 4.540426    | 0.24 | 5.3%   |
| BC016495 | 1.66014     | 0.25 | 14.9%  |
| BC016548 | 0.00602282  | 0.01 | 223.6% |
| BC016579 | 0.0034949   | 0.01 | 223.6% |
| BC017158 | 7.851328    | 0.24 | 3.0%   |
| BC017612 | 0.736501    | 0.23 | 31.9%  |
| BC017643 | 9.003342    | 0.46 | 5.2%   |
| BC017647 | 8.918438    | 0.72 | 8.0%   |
| BC018101 | 0.3032854   | 0.04 | 12.0%  |
| BC018200 | 15.9004     | 1.58 | 10.0%  |
| BC018242 | 62.26446    | 4.93 | 7.9%   |
| BC018310 | 1.791052    | 0.18 | 10.3%  |
| BC018371 | 0.949485    | 0.10 | 10.1%  |
| BC018465 | 0.00323038  | 0.01 | 223.6% |
| BC018507 | 17.30964    | 0.66 | 3.8%   |
| BC019639 | 7.038798    | 0.61 | 8.7%   |
| BC019681 | 0.09451888  | 0.04 | 42.4%  |
| BC019699 | 0.1708626   | 0.07 | 41.3%  |
| BC019819 | 0.0035333   | 0.01 | 223.6% |
| BC019943 | 5.813728    | 0.16 | 2.7%   |
| BC020002 | 7.253418    | 0.43 | 6.0%   |
| BC020077 | 0.3331008   | 0.05 | 13.7%  |
| BC020182 | 1.6566032   | 0.79 | 47.5%  |
| BC020326 | 3.285382    | 0.32 | 9.6%   |
| BC020394 | 0.0314333   | 0.00 | 10.9%  |
| BC020449 | 1.83254     | 0.37 | 20.4%  |
| BC020535 | 0.00925798  | 0.01 | 110.5% |
| BC021381 | 8.594214    | 0.68 | 8.0%   |
| BC021395 | 10.877426   | 0.83 | 7.6%   |
| BC021523 | 6.265878    | 0.13 | 2.0%   |
| BC021608 | 0.10209068  | 0.05 | 53.8%  |
| BC021611 | 7.990414    | 0.45 | 5.6%   |
| BC021614 | 0           | 0.00 |        |
| BC021767 | 0.7674586   | 0.08 | 10.2%  |
| BC021774 | 0.003603996 | 0.00 | 137.3% |
| BC021785 | 0.05092384  | 0.04 | 84.6%  |
| BC021891 | 0.8483008   | 0.14 | 15.9%  |
| BC021919 | 0           | 0.00 |        |
| BC021953 | 0.431735    | 0.19 | 43.0%  |
| BC022224 | 2.111722    | 0.22 | 10.2%  |

|          |             |      |        |
|----------|-------------|------|--------|
| BC022590 | 10.77677    | 0.97 | 9.0%   |
| BC022623 | 4.216274    | 0.22 | 5.2%   |
| BC022651 | 0.11130392  | 0.06 | 50.5%  |
| BC022687 | 3.36963     | 0.39 | 11.6%  |
| BC023055 | 36.23802    | 2.79 | 7.7%   |
| BC023070 | 0.00855942  | 0.02 | 223.6% |
| BC023105 | 0.00413386  | 0.01 | 223.6% |
| BC023179 | 1.137642    | 0.11 | 9.7%   |
| BC023202 | 4.264616    | 0.11 | 2.6%   |
| BC023483 | 7.688634    | 1.44 | 18.7%  |
| BC023719 | 0.08318064  | 0.02 | 27.2%  |
| BC023744 | 0.5462494   | 0.13 | 24.7%  |
| BC023814 | 4.902426    | 0.28 | 5.6%   |
| BC023818 | 12.56928    | 1.85 | 14.8%  |
| BC023829 | 12.80928    | 0.51 | 4.0%   |
| BC023882 | 2.107152    | 0.57 | 27.0%  |
| BC023947 | 3.204928    | 0.69 | 21.5%  |
| BC024139 | 0.003402238 | 0.00 | 137.8% |
| BC024386 | 0           | 0.00 |        |
| BC024479 | 4.880528    | 0.37 | 7.6%   |
| BC024561 | 0.1379676   | 0.09 | 62.5%  |
| BC024571 | 3.124058    | 0.69 | 22.0%  |
| BC024582 | 0.04422336  | 0.02 | 49.6%  |
| BC024672 | 0.10689654  | 0.06 | 55.2%  |
| BC024760 | 0.2065624   | 0.06 | 28.1%  |
| BC024814 | 9.684442    | 1.28 | 13.2%  |
| BC024868 | 23.9472     | 0.40 | 1.7%   |
| BC024997 | 0.00261094  | 0.01 | 223.6% |
| BC025054 | 0.2483114   | 0.03 | 13.0%  |
| BC025067 | 2.182532    | 0.70 | 32.3%  |
| BC025076 | 2.390752    | 0.22 | 9.1%   |
| BC025190 | 4.640736    | 0.44 | 9.4%   |
| BC025446 | 0.06432896  | 0.04 | 63.0%  |
| BC025462 | 0.19304588  | 0.17 | 89.2%  |
| BC025546 | 1.0933812   | 0.11 | 10.4%  |
| BC025575 | 18.25622    | 1.71 | 9.4%   |
| BC025816 | 3.155776    | 0.20 | 6.3%   |
| BC025885 | 29.6798     | 0.65 | 2.2%   |
| BC025945 | 0           | 0.00 |        |
| BC026374 | 0           | 0.00 |        |
| BC026434 | 8.616608    | 0.50 | 5.8%   |
| BC026439 | 0           | 0.00 |        |
| BC026478 | 0.2920652   | 0.06 | 21.0%  |
| BC026585 | 0.2511438   | 0.06 | 23.2%  |
| BC026590 | 4.213206    | 0.30 | 7.1%   |
| BC026600 | 0.16324282  | 0.07 | 44.6%  |
| BC026601 | 2.638516    | 0.06 | 2.1%   |

|          |             |      |        |
|----------|-------------|------|--------|
| BC026682 | 0.0222501   | 0.00 | 8.9%   |
| BC026782 | 0           | 0.00 |        |
| BC026913 | 7.85917     | 1.51 | 19.2%  |
| BC027057 | 0           | 0.00 |        |
| BC027072 | 0.011791674 | 0.01 | 90.6%  |
| BC027231 | 2.51152     | 0.17 | 6.6%   |
| BC027344 | 4.678514    | 0.19 | 4.0%   |
| BC027359 | 1.608848    | 0.36 | 22.4%  |
| BC027389 | 0.33953734  | 0.15 | 42.8%  |
| BC027541 | 0.280081    | 0.14 | 49.8%  |
| BC027544 | 0           | 0.00 |        |
| BC027576 | 0           | 0.00 |        |
| BC027664 | 0           | 0.00 |        |
| BC027670 | 0.0243438   | 0.05 | 223.6% |
| BC027685 | 0.05049118  | 0.05 | 92.0%  |
| BC027696 | 0.10552048  | 0.02 | 15.5%  |
| BC027703 | 1.4891074   | 0.47 | 31.6%  |
| BC027814 | 0.7653358   | 0.09 | 11.1%  |
| BC027835 | 29.90722    | 2.32 | 7.8%   |
| BC028252 | 0.20829824  | 0.07 | 32.9%  |
| BC028528 | 0.2325866   | 0.04 | 17.7%  |
| BC028532 | 0.00949368  | 0.02 | 223.6% |
| BC028660 | 0           | 0.00 |        |
| BC028663 | 8.831238    | 0.73 | 8.3%   |
| BC028777 | 0.53633794  | 0.51 | 95.8%  |
| BC028801 | 15.8561     | 1.96 | 12.3%  |
| BC028804 | 0.0370374   | 0.02 | 53.7%  |
| BC028808 | 0.07501234  | 0.04 | 55.3%  |
| BC028950 | 0           | 0.00 |        |
| BC029165 | 9.519584    | 0.45 | 4.7%   |
| BC029169 | 1.684724    | 0.21 | 12.2%  |
| BC029214 | 9.765794    | 1.06 | 10.9%  |
| BC029331 | 5.602504    | 0.25 | 4.5%   |
| BC029684 | 0.0111539   | 0.02 | 143.6% |
| BC029710 | 0           | 0.00 |        |
| BC029726 | 1.789434    | 0.16 | 8.7%   |
| BC030045 | 18.22504    | 1.01 | 5.6%   |
| BC030046 | 11.08452    | 0.31 | 2.8%   |
| BC030050 | 0.3952376   | 0.09 | 23.5%  |
| BC030183 | 0.00741334  | 0.02 | 223.6% |
| BC030307 | 0.4485266   | 0.03 | 6.5%   |
| BC030336 | 26.34772    | 1.29 | 4.9%   |
| BC030392 | 0           | 0.00 |        |
| BC030396 | 0           | 0.00 |        |
| BC030398 | 0.04672904  | 0.04 | 81.9%  |
| BC030440 | 0.2417146   | 0.07 | 30.9%  |
| BC030469 | 0           | 0.00 |        |

|          |             |      |        |
|----------|-------------|------|--------|
| BC030470 | 0.6461848   | 0.20 | 31.2%  |
| BC030476 | 0.14681598  | 0.07 | 44.9%  |
| BC030477 | 0.3000626   | 0.09 | 29.8%  |
| BC030499 | 0.08875728  | 0.09 | 101.1% |
| BC030500 | 2.509198    | 0.46 | 18.3%  |
| BC030867 | 0.160166    | 0.02 | 13.1%  |
| BC030884 | 11.2137     | 0.50 | 4.5%   |
| BC031181 | 63.05832    | 4.75 | 7.5%   |
| BC031353 | 8.768002    | 0.47 | 5.4%   |
| BC031434 | 1.0512328   | 0.31 | 29.2%  |
| BC031441 | 1.658534    | 0.24 | 14.2%  |
| BC031503 | 3.042064    | 0.20 | 6.6%   |
| BC031748 | 3.668992    | 0.27 | 7.4%   |
| BC031781 | 6.995414    | 0.56 | 8.0%   |
| BC031853 | 8.633592    | 0.40 | 4.6%   |
| BC031901 | 0.00366814  | 0.01 | 223.6% |
| BC032181 | 0.00215888  | 0.00 | 223.6% |
| BC032204 | 1.276185    | 0.48 | 37.4%  |
| BC032265 | 7.85171     | 0.40 | 5.1%   |
| BC032967 | 1.333952    | 0.06 | 4.3%   |
| BC033430 | 1.991266    | 0.29 | 14.5%  |
| BC033443 | 0.05520428  | 0.02 | 32.5%  |
| BC033467 | 0.08992622  | 0.03 | 29.1%  |
| BC033915 | 24.3908     | 2.08 | 8.5%   |
| BC033916 | 0.2398508   | 0.06 | 26.8%  |
| BC033932 | 0.03677294  | 0.03 | 74.5%  |
| BC034076 | 0.08338178  | 0.03 | 30.2%  |
| BC034090 | 0.4368682   | 0.07 | 15.1%  |
| BC034093 | 0.6199322   | 0.14 | 22.0%  |
| BC034252 | 5.582418    | 1.01 | 18.2%  |
| BC034735 | 9.406642    | 1.08 | 11.4%  |
| BC034902 | 0.026660025 | 0.03 | 99.8%  |
| BC035044 | 0.0050535   | 0.01 | 137.6% |
| BC035255 | 7.548674    | 0.36 | 4.8%   |
| BC035295 | 10.706036   | 1.01 | 9.5%   |
| BC035532 | 0.577768    | 0.14 | 23.5%  |
| BC035537 | 3.546786    | 0.29 | 8.2%   |
| BC035947 | 0.07372214  | 0.03 | 37.3%  |
| BC035954 | 0.4690482   | 0.12 | 26.5%  |
| BC036313 | 17.3296     | 0.77 | 4.4%   |
| BC036641 | 0.001634418 | 0.00 | 223.6% |
| BC037032 | 1.1369848   | 0.10 | 9.2%   |
| BC037034 | 27.31372    | 0.97 | 3.6%   |
| BC037112 | 13.43244    | 0.62 | 4.6%   |
| BC037156 | 0           | 0.00 |        |
| BC037178 | 0.4021368   | 0.25 | 63.3%  |
| BC037369 | 7.147756    | 0.48 | 6.7%   |

|          |             |      |        |
|----------|-------------|------|--------|
| BC037393 | 3.969058    | 0.39 | 9.7%   |
| BC037520 | 12.68864    | 1.14 | 8.9%   |
| BC037703 | 0.04878432  | 0.02 | 42.5%  |
| BC038073 | 0.00126686  | 0.00 | 223.6% |
| BC038155 | 0.0057694   | 0.01 | 223.6% |
| BC038156 | 3.737108    | 0.29 | 7.8%   |
| BC038167 | 0           | 0.00 |        |
| BC038171 | 0.5453914   | 0.10 | 19.1%  |
| BC038278 | 0.00819744  | 0.01 | 162.7% |
| BC038286 | 87.01396    | 2.43 | 2.8%   |
| BC038328 | 0.08327424  | 0.06 | 69.5%  |
| BC038330 | 0.07580272  | 0.04 | 54.3%  |
| BC038349 | 5.430844    | 0.18 | 3.3%   |
| BC038474 | 0.396436    | 0.14 | 36.2%  |
| BC038479 | 2.119554    | 0.26 | 12.4%  |
| BC038520 | 0.03277326  | 0.02 | 68.6%  |
| BC038648 | 0           | 0.00 |        |
| BC038822 | 2.940146    | 0.09 | 3.2%   |
| BC038925 | 1.658462    | 0.08 | 4.7%   |
| BC038927 | 0.0062604   | 0.01 | 223.6% |
| BC038929 | 0.13803314  | 0.04 | 27.0%  |
| BC039093 | 9.19481     | 0.65 | 7.1%   |
| BC039210 | 0.3351382   | 0.08 | 24.9%  |
| BC039632 | 0.5257072   | 0.11 | 20.7%  |
| BC039766 | 0           | 0.00 |        |
| BC039771 | 0.0300855   | 0.01 | 22.6%  |
| BC039791 | 0           | 0.00 |        |
| BC039928 | 3.602292    | 0.29 | 8.0%   |
| BC039940 | 0.0348791   | 0.05 | 142.4% |
| BC039975 | 5.194412    | 0.33 | 6.4%   |
| BC039997 | 0.14262098  | 0.09 | 64.8%  |
| BC040216 | 0.03243079  | 0.02 | 61.8%  |
| BC040255 | 0.0978875   | 0.04 | 36.8%  |
| BC040266 | 1.1832806   | 0.19 | 16.4%  |
| BC040690 | 1.536856    | 0.14 | 9.2%   |
| BC040754 | 0           | 0.00 |        |
| BC040758 | 0.008248018 | 0.01 | 142.7% |
| BC040803 | 5.65567     | 1.26 | 22.2%  |
| BC040804 | 5.622146    | 0.27 | 4.7%   |
| BC042407 | 0           | 0.00 |        |
| BC042696 | 1.995008    | 0.30 | 15.1%  |
| BC042720 | 12.129386   | 1.67 | 13.8%  |
| BC042727 | 0.02109124  | 0.01 | 57.8%  |
| BC042782 | 0.03177626  | 0.03 | 105.2% |
| BC042783 | 0.14756976  | 0.10 | 65.7%  |
| BC042789 | 0           | 0.00 |        |
| BC043098 | 106.4016    | 1.16 | 1.1%   |

|          |             |      |        |
|----------|-------------|------|--------|
| BC043118 | 0.3038404   | 0.05 | 15.3%  |
| BC043301 | 2.663688    | 0.22 | 8.4%   |
| BC043476 | 2.80979     | 0.49 | 17.4%  |
| BC043932 | 1.1098376   | 0.17 | 15.3%  |
| BC043934 | 0.01266688  | 0.01 | 108.1% |
| BC043943 | 0.3873238   | 0.05 | 14.0%  |
| BC044745 | 4.618548    | 0.43 | 9.2%   |
| BC044868 | 0           | 0.00 |        |
| BC044870 | 0.3301778   | 0.08 | 24.0%  |
| BC044880 | 0.01722416  | 0.01 | 83.9%  |
| BC046251 | 0.09375358  | 0.05 | 53.9%  |
| BC046331 | 5.618634    | 0.31 | 5.6%   |
| BC046404 | 0.7823814   | 0.09 | 12.0%  |
| BC046436 | 0           | 0.00 |        |
| BC046487 | 0.03925192  | 0.04 | 106.0% |
| BC046508 | 0           | 0.00 |        |
| BC047062 | 0           | 0.00 |        |
| BC047208 | 9.000084    | 0.82 | 9.1%   |
| BC047216 | 0           | 0.00 |        |
| BC048080 | 0.7170696   | 0.10 | 13.3%  |
| BC048354 | 14.3883     | 0.58 | 4.0%   |
| BC048355 | 1.381622    | 0.10 | 7.5%   |
| BC048390 | 0           | 0.00 |        |
| BC048393 | 0.2135472   | 0.02 | 10.5%  |
| BC048403 | 3.728582    | 0.31 | 8.4%   |
| BC048502 | 0           | 0.00 |        |
| BC048507 | 2.027172    | 0.56 | 27.4%  |
| BC048519 | 0           | 0.00 |        |
| BC048546 | 0.14183732  | 0.11 | 77.3%  |
| BC048555 | 0           | 0.00 |        |
| BC048556 | 11.23154    | 1.26 | 11.2%  |
| BC048559 | 0           | 0.00 |        |
| BC048562 | 0           | 0.00 |        |
| BC048576 | 0           | 0.00 |        |
| BC048579 | 0           | 0.00 |        |
| BC048584 | 0.01161974  | 0.03 | 223.6% |
| BC048585 | 0           | 0.00 |        |
| BC048594 | 0.3298934   | 0.14 | 42.8%  |
| BC048599 | 0           | 0.00 |        |
| BC048600 | 0           | 0.00 |        |
| BC048601 | 0           | 0.00 |        |
| BC048602 | 0           | 0.00 |        |
| BC048609 | 0.000001852 | 0.00 | 223.6% |
| BC048612 | 1.4061268   | 0.36 | 25.5%  |
| BC048615 | 0           | 0.00 |        |
| BC048628 | 0           | 0.00 |        |
| BC048643 | 0           | 0.00 |        |

|          |             |      |        |
|----------|-------------|------|--------|
| BC048644 | 0.02997412  | 0.02 | 61.1%  |
| BC048649 | 0           | 0.00 |        |
| BC048651 | 0.00427326  | 0.01 | 223.6% |
| BC048654 | 0           | 0.00 |        |
| BC048655 | 0           | 0.00 |        |
| BC048656 | 0           | 0.00 |        |
| BC048662 | 0           | 0.00 |        |
| BC048663 | 0.14872316  | 0.07 | 46.0%  |
| BC048666 | 0.03321898  | 0.05 | 154.5% |
| BC048671 | 0           | 0.00 |        |
| BC048672 | 0           | 0.00 |        |
| BC048678 | 0           | 0.00 |        |
| BC048679 | 0           | 0.00 |        |
| BC048715 | 0.04045928  | 0.03 | 71.5%  |
| BC048720 | 0.12709708  | 0.08 | 61.5%  |
| BC048731 | 2.536912    | 0.32 | 12.7%  |
| BC048749 | 0.7998716   | 0.13 | 16.5%  |
| BC048761 | 0.06821528  | 0.02 | 24.9%  |
| BC048764 | 0           | 0.00 |        |
| BC048765 | 0           | 0.00 |        |
| BC048766 | 0.13239702  | 0.06 | 43.7%  |
| BC048859 | 0.033821258 | 0.02 | 61.7%  |
| BC048943 | 0.00238186  | 0.01 | 223.6% |
| BC048947 | 1.111792013 | 0.70 | 63.2%  |
| BC048951 | 7.915252    | 0.33 | 4.2%   |
| BC049144 | 1.317896    | 0.15 | 11.2%  |
| BC049259 | 13.67926    | 2.08 | 15.2%  |
| BC049265 | 1.1621172   | 1.46 | 125.9% |
| BC049349 | 3.569114    | 0.34 | 9.7%   |
| BC049352 | 0.0763961   | 0.03 | 38.1%  |
| BC049560 | 0.00530558  | 0.01 | 139.1% |
| BC049635 | 1.686888    | 0.40 | 23.7%  |
| BC049642 | 0           | 0.00 |        |
| BC049653 | 0.1205545   | 0.06 | 47.8%  |
| BC049655 | 0.00762834  | 0.02 | 223.6% |
| BC049671 | 1.922098    | 0.58 | 30.2%  |
| BC049685 | 0.03017882  | 0.03 | 83.4%  |
| BC049692 | 0           | 0.00 |        |
| BC049702 | 0           | 0.00 |        |
| BC049706 | 0           | 0.00 |        |
| BC049715 | 1.679334    | 0.21 | 12.5%  |
| BC049716 | 0.01505534  | 0.02 | 140.6% |
| BC049717 | 0           | 0.00 |        |
| BC049730 | 0.0055072   | 0.01 | 223.6% |
| BC049735 | 0.1442392   | 0.21 | 146.1% |
| BC049749 | 0           | 0.00 |        |
| BC049760 | 0.00720656  | 0.02 | 223.6% |

|          |            |      |        |
|----------|------------|------|--------|
| BC049762 | 0.04623248 | 0.03 | 62.5%  |
| BC049805 | 4.538122   | 0.38 | 8.5%   |
| BC049806 | 14.40664   | 2.30 | 16.0%  |
| BC049807 | 4.84221    | 0.31 | 6.3%   |
| BC049966 | 0.02673558 | 0.01 | 30.1%  |
| BC050071 | 0.07944194 | 0.03 | 37.7%  |
| BC050078 | 3.413876   | 0.24 | 7.1%   |
| BC050092 | 0.6648486  | 0.08 | 11.3%  |
| BC050099 | 0.0098051  | 0.01 | 91.8%  |
| BC050122 | 1.0019276  | 0.11 | 11.0%  |
| BC050135 | 0.01353454 | 0.03 | 223.6% |
| BC050140 | 0.03967986 | 0.03 | 70.7%  |
| BC050196 | 0.09207466 | 0.03 | 36.4%  |
| BC050210 | 0.00354722 | 0.01 | 223.6% |
| BC050213 | 0.07196376 | 0.01 | 19.3%  |
| BC050254 | 3.39007    | 0.23 | 6.9%   |
| BC050777 | 0.04772386 | 0.03 | 54.3%  |
| BC050789 | 0.009971   | 0.01 | 137.6% |
| BC050868 | 21.17036   | 0.73 | 3.5%   |
| BC050972 | 0          | 0.00 |        |
| BC050974 | 0.10039278 | 0.04 | 37.4%  |
| BC050980 | 0.04452992 | 0.03 | 63.6%  |
| BC050982 | 0          | 0.00 |        |
| BC050987 | 0.1112685  | 0.03 | 23.9%  |
| BC051019 | 0.36760708 | 0.50 | 135.1% |
| BC051062 | 0.5310694  | 0.15 | 28.2%  |
| BC051070 | 0          | 0.00 |        |
| BC051142 | 0.8793726  | 0.13 | 14.5%  |
| BC051212 | 0.03304162 | 0.03 | 87.3%  |
| BC051227 | 11.130518  | 1.07 | 9.6%   |
| BC051232 | 1.3285052  | 0.26 | 19.2%  |
| BC051402 | 0          | 0.00 |        |
| BC051407 | 0.4304332  | 0.15 | 34.8%  |
| BC051515 | 9.064086   | 0.72 | 8.0%   |
| BC051516 | 0.07667148 | 0.03 | 37.3%  |
| BC051525 | 0          | 0.00 |        |
| BC051537 | 0.00527668 | 0.01 | 223.6% |
| BC051589 | 6.012858   | 0.87 | 14.4%  |
| BC051628 | 0.00302198 | 0.01 | 223.6% |
| BC051665 | 0          | 0.00 |        |
| BC052040 | 6.046092   | 0.43 | 7.1%   |
| BC052055 | 12.87576   | 1.40 | 10.9%  |
| BC052328 | 3.457006   | 0.38 | 11.1%  |
| BC052364 | 0.03783692 | 0.03 | 79.6%  |
| BC052484 | 0.0171647  | 0.02 | 99.6%  |
| BC052524 | 0          | 0.00 |        |
| BC052551 | 0.7091048  | 0.21 | 29.0%  |



|          |             |      |        |
|----------|-------------|------|--------|
| BC052688 | 0.145729    | 0.03 | 20.7%  |
| BC053393 | 0           | 0.00 |        |
| BC053440 | 4.159358    | 0.33 | 7.8%   |
| BC053725 | 0.611409    | 0.12 | 20.3%  |
| BC053749 | 1.559778    | 0.13 | 8.5%   |
| BC053974 | 0.4547708   | 0.12 | 26.1%  |
| BC053977 | 0           | 0.00 |        |
| BC053978 | 0           | 0.00 |        |
| BC053994 | 1.327638    | 0.20 | 15.2%  |
| BC054059 | 0           | 0.00 |        |
| BC054075 | 3.0172      | 0.65 | 21.6%  |
| BC054394 | 3.924612    | 0.26 | 6.5%   |
| BC054406 | 0.11777318  | 0.04 | 35.5%  |
| BC054438 | 0.5864088   | 0.19 | 31.8%  |
| BC055004 | 0           | 0.00 |        |
| BC055065 | 0           | 0.00 |        |
| BC055107 | 0.11235888  | 0.02 | 20.1%  |
| BC055111 | 0.08107786  | 0.05 | 60.6%  |
| BC055324 | 1.8042368   | 1.04 | 57.4%  |
| BC055402 | 0.0050503   | 0.01 | 138.6% |
| BC055403 | 10.98958    | 0.76 | 6.9%   |
| BC055463 | 0.4280258   | 0.39 | 90.1%  |
| BC055806 | 2.572288    | 0.34 | 13.1%  |
| BC055823 | 0.05821094  | 0.04 | 76.0%  |
| BC055918 | 2.09512     | 0.58 | 27.7%  |
| BC055944 | 0.5029299   | 0.51 | 100.8% |
| BC056163 | 0.0562594   | 0.13 | 223.6% |
| BC056174 | 1.212604    | 0.22 | 18.2%  |
| BC056189 | 0.3176802   | 0.12 | 36.8%  |
| BC056356 | 0.06752006  | 0.02 | 22.5%  |
| BC056393 | 62.25208    | 4.51 | 7.2%   |
| BC056474 | 5.200462    | 0.81 | 15.6%  |
| BC056923 | 0.02680646  | 0.01 | 40.5%  |
| BC057022 | 1.888036    | 0.30 | 15.6%  |
| BC057079 | 6.53648     | 0.44 | 6.8%   |
| BC057135 | 0.009598398 | 0.01 | 72.7%  |
| BC057170 | 0.2193622   | 0.06 | 25.8%  |
| BC057371 | 23.30814    | 0.98 | 4.2%   |
| BC057381 | 7.622316    | 1.00 | 13.1%  |
| BC057552 | 10.143906   | 1.32 | 13.0%  |
| BC057593 | 0.6140336   | 0.25 | 41.2%  |
| BC057611 | 0.13282192  | 0.06 | 41.9%  |
| BC057627 | 7.110072    | 0.66 | 9.3%   |
| BC057893 | 2.784886    | 0.23 | 8.2%   |
| BC058096 | 0.6021838   | 0.13 | 21.5%  |
| BC058417 | 0.205819    | 0.03 | 12.9%  |
| BC058420 | 1.174154    | 0.13 | 11.0%  |

|          |             |      |        |
|----------|-------------|------|--------|
| BC058428 | 2.459522    | 0.39 | 15.7%  |
| BC058545 | 2.131022    | 0.26 | 12.3%  |
| BC058760 | 12.6956     | 0.77 | 6.0%   |
| BC058988 | 0.11393822  | 0.09 | 78.7%  |
| BC059025 | 6.801172    | 1.63 | 23.9%  |
| BC059842 | 3.99384     | 0.47 | 11.7%  |
| BC059853 | 3.921252    | 0.21 | 5.5%   |
| BC059867 | 3.593622    | 0.30 | 8.4%   |
| BC059891 | 3.47501     | 0.39 | 11.2%  |
| BC059892 | 3.955174    | 0.93 | 23.5%  |
| BC060111 | 7.18143     | 1.61 | 22.5%  |
| BC060136 | 5.307142    | 0.73 | 13.7%  |
| BC060146 | 0.145182546 | 0.13 | 91.0%  |
| BC060267 | 0.1620038   | 0.04 | 22.6%  |
| BC060302 | 0           | 0.00 |        |
| BC060616 | 3.765616    | 0.38 | 10.0%  |
| BC060631 | 22.22048    | 0.71 | 3.2%   |
| BC060632 | 35.24702    | 1.09 | 3.1%   |
| BC060988 | 2.311334    | 0.38 | 16.6%  |
| BC061039 | 0.08447466  | 0.04 | 44.5%  |
| BC061047 | 0           | 0.00 |        |
| BC061156 | 0           | 0.00 |        |
| BC061194 | 0.4118276   | 0.20 | 47.6%  |
| BC061212 | 0           | 0.00 |        |
| BC061237 | 0           | 0.00 |        |
| BC061253 | 11.6826     | 0.82 | 7.0%   |
| BC061511 | 0.6119618   | 0.20 | 32.4%  |
| BC062109 | 11.34516    | 0.97 | 8.5%   |
| BC062115 | 1.83156     | 0.09 | 4.8%   |
| BC062127 | 0.1265034   | 0.01 | 10.9%  |
| BC062185 | 0.3829504   | 0.09 | 23.5%  |
| BC062254 | 0.7748502   | 0.28 | 36.0%  |
| BC062650 | 2.474208    | 0.16 | 6.5%   |
| BC062820 | 0.19011342  | 0.29 | 154.5% |
| BC062821 | 0           | 0.00 |        |
| BC062895 | 3.368948    | 0.57 | 16.8%  |
| BC062913 | 0.09639944  | 0.06 | 63.3%  |
| BC063263 | 1.99531     | 0.18 | 9.1%   |
| BC063749 | 0.8798172   | 0.13 | 15.0%  |
| BC064033 | 0.0476319   | 0.03 | 54.3%  |
| BC064072 | 0.00661499  | 0.01 | 158.7% |
| BC064078 | 2.767576    | 0.35 | 12.5%  |
| BC064103 | 0.02752312  | 0.02 | 69.1%  |
| BC064105 | 0.02994602  | 0.04 | 142.9% |
| BC064108 | 0.374172    | 0.16 | 42.0%  |
| BC064116 | 0           | 0.00 |        |
| BC064118 | 0.5288176   | 0.16 | 30.9%  |

|          |             |      |        |
|----------|-------------|------|--------|
| BC064125 | 0           | 0.00 |        |
| BC064451 | 0           | 0.00 |        |
| BC064456 | 4.412458    | 0.59 | 13.4%  |
| BC064714 | 0.8315078   | 0.14 | 17.3%  |
| BC064812 | 0.3341898   | 0.02 | 6.1%   |
| BC065048 | 0.10926608  | 0.02 | 19.5%  |
| BC065085 | 1.196366    | 0.14 | 11.5%  |
| BC065087 | 0.0070646   | 0.01 | 138.2% |
| BC065127 | 0.6558634   | 0.10 | 15.2%  |
| BC065149 | 0.7612628   | 0.11 | 15.0%  |
| BC065393 | 0.0501634   | 0.08 | 152.7% |
| BC065397 | 0.9446438   | 0.17 | 17.8%  |
| BC065398 | 0           | 0.00 |        |
| BC065403 | 0           | 0.00 |        |
| BC065408 | 1.801176    | 0.47 | 26.1%  |
| BC065777 | 2.376272    | 0.51 | 21.6%  |
| BC065800 | 0.4094352   | 0.12 | 29.8%  |
| BC066028 | 11.61586    | 0.38 | 3.3%   |
| BC066100 | 8.022692    | 0.75 | 9.4%   |
| BC066107 | 2.745546    | 0.23 | 8.3%   |
| BC066135 | 0           | 0.00 |        |
| BC066226 | 0.08835318  | 0.03 | 38.3%  |
| BC067010 | 6.171578    | 0.32 | 5.2%   |
| BC067033 | 0.016725724 | 0.01 | 64.3%  |
| BC067047 | 3.508728    | 0.40 | 11.3%  |
| BC067068 | 2.392486    | 0.20 | 8.2%   |
| BC067074 | 0.1506312   | 0.02 | 13.5%  |
| BC067207 | 20.85062    | 0.85 | 4.1%   |
| BC067249 | 0.01866328  | 0.04 | 223.6% |
| BC068110 | 12.07518    | 0.59 | 4.9%   |
| BC068148 | 1.764306    | 0.29 | 16.5%  |
| BC068157 | 6.682842    | 0.32 | 4.8%   |
| BC068229 | 0.05421484  | 0.02 | 40.9%  |
| BC068251 | 1.71785     | 0.14 | 8.0%   |
| BC068281 | 2.098326    | 0.26 | 12.6%  |
| BC068298 | 6.378464    | 0.49 | 7.7%   |
| BC070417 | 5.14963     | 1.57 | 30.5%  |
| BC070425 | 0.07116124  | 0.03 | 47.8%  |
| BC070450 | 11.350228   | 1.16 | 10.2%  |
| BC071190 | 0.3209672   | 0.08 | 25.4%  |
| BC071263 | 0.01074588  | 0.02 | 140.1% |
| BC072557 | 0.2487648   | 0.06 | 23.2%  |
| BC072601 | 0.0108238   | 0.01 | 68.9%  |
| BC072620 | 6.234112    | 0.38 | 6.1%   |
| BC072643 | 0.001655638 | 0.00 | 223.6% |
| BC072654 | 4.967724    | 0.39 | 7.9%   |
| BC075635 | 0.3729694   | 0.05 | 14.1%  |

|          |             |      |        |
|----------|-------------|------|--------|
| BC075654 | 0.15190714  | 0.11 | 69.2%  |
| BC075659 | 0.3733996   | 0.08 | 20.7%  |
| BC076616 | 0.7650668   | 0.31 | 40.4%  |
| BC078436 | 12.53794    | 1.14 | 9.1%   |
| BC079612 | 0.9064284   | 0.12 | 12.7%  |
| BC079836 | 7.153166    | 0.41 | 5.7%   |
| BC079845 | 4.049816    | 1.71 | 42.3%  |
| BC079901 | 0           | 0.00 |        |
| BC079904 | 0           | 0.00 |        |
| BC080687 | 2.188172    | 0.35 | 15.8%  |
| BC080695 | 0           | 0.00 |        |
| BC080696 | 0           | 0.00 |        |
| BC080769 | 0.010379374 | 0.00 | 34.6%  |
| BC082544 | 0           | 0.00 |        |
| BC082591 | 0.02175676  | 0.01 | 30.8%  |
| BC082597 | 0.5601844   | 0.09 | 16.8%  |
| BC083001 | 0           | 0.00 |        |
| BC083116 | 0.6130008   | 0.31 | 49.8%  |
| BC083167 | 3.059394    | 0.34 | 11.0%  |
| BC083502 | 0.7978238   | 0.06 | 7.8%   |
| BC084590 | 0           | 0.00 |        |
| BC085144 | 0.4613744   | 0.14 | 30.5%  |
| BC085231 | 0.9848902   | 0.27 | 27.3%  |
| BC085271 | 0           | 0.00 |        |
| BC085284 | 0           | 0.00 |        |
| BC085508 | 1.59677     | 0.14 | 8.6%   |
| BC086315 | 1.775826    | 0.41 | 23.2%  |
| BC086318 | 0.5170382   | 0.12 | 24.2%  |
| BC086805 | 14.61244    | 0.68 | 4.6%   |
| BC086906 | 0           | 0.00 |        |
| BC087938 | 0.06636972  | 0.04 | 63.2%  |
| BC087945 | 2.489386    | 0.58 | 23.2%  |
| BC087948 | 0           | 0.00 |        |
| BC088983 | 2.15049     | 0.24 | 11.3%  |
| BC089377 | 0.5557706   | 0.16 | 29.4%  |
| BC089491 | 0.5502704   | 0.07 | 13.6%  |
| BC089513 | 0           | 0.00 |        |
| BC089597 | 0.0185955   | 0.03 | 137.0% |
| BC091771 | 1.3111138   | 0.20 | 14.9%  |
| BC094257 | 0.21864158  | 0.11 | 51.4%  |
| BC094334 | 11.1795     | 0.40 | 3.6%   |
| BC094356 | 3.943264    | 0.73 | 18.5%  |
| BC094408 | 0.1726946   | 0.12 | 71.7%  |
| BC094509 | 0.08872832  | 0.03 | 34.1%  |
| BC094555 | 8.1404      | 0.47 | 5.8%   |
| BC094615 | 0.01593314  | 0.01 | 91.8%  |
| BC094633 | 0.2654638   | 0.15 | 55.4%  |

|          |             |      |        |
|----------|-------------|------|--------|
| BC094642 | 0           | 0.00 |        |
| BC094916 | 0           | 0.00 |        |
| BC094935 | 2.952866    | 0.31 | 10.4%  |
| BC096037 | 2.569426    | 0.32 | 12.6%  |
| BC096391 | 16.75056    | 2.69 | 16.1%  |
| BC096410 | 14.672      | 1.72 | 11.7%  |
| BC096411 | 0.026948582 | 0.02 | 90.5%  |
| BC096416 | 0.06116382  | 0.02 | 35.3%  |
| BC096478 | 0           | 0.00 |        |
| BC098222 | 0           | 0.00 |        |
| BC098228 | 0.189315    | 0.21 | 113.1% |
| BC099381 | 0           | 0.00 |        |
| BC099422 | 0.7339018   | 0.25 | 34.1%  |
| BC099512 | 2.087954    | 0.35 | 17.0%  |
| BC099513 | 0           | 0.00 |        |
| BC099522 | 0.31247126  | 0.38 | 122.8% |
| BC099523 | 0.08961442  | 0.11 | 120.0% |
| BC099526 | 0.01109792  | 0.02 | 223.6% |
| BC099528 | 1.997068    | 0.22 | 10.9%  |
| BC099544 | 0.00910002  | 0.02 | 223.6% |
| BC099561 | 0.3589756   | 0.11 | 31.2%  |
| BC099562 | 0.06481582  | 0.07 | 106.8% |
| BC099567 | 0.3466474   | 0.12 | 35.4%  |
| BC099568 | 2.620624    | 0.43 | 16.4%  |
| BC099571 | 1.165553    | 0.26 | 22.1%  |
| BC099572 | 0           | 0.00 |        |
| BC099577 | 0.06519896  | 0.03 | 44.6%  |
| BC099582 | 0           | 0.00 |        |
| BC099591 | 2.727712    | 0.27 | 9.7%   |
| BC099610 | 0.04505936  | 0.04 | 89.2%  |
| BC099611 | 1.2026966   | 0.47 | 39.1%  |
| BC099953 | 0.0025797   | 0.01 | 223.6% |
| BC100303 | 0           | 0.00 |        |
| BC100417 | 0.0881706   | 0.06 | 71.4%  |
| BC100427 | 0.179092    | 0.09 | 49.5%  |
| BC100480 | 0           | 0.00 |        |
| BC100490 | 0.00874996  | 0.02 | 223.6% |
| BC100491 | 0.05912082  | 0.05 | 80.4%  |
| BC100492 | 0.08578972  | 0.05 | 60.2%  |
| BC100494 | 0           | 0.00 |        |
| BC100495 | 0           | 0.00 |        |
| BC100504 | 0           | 0.00 |        |
| BC100510 | 0           | 0.00 |        |
| BC100523 | 0.2076386   | 0.07 | 34.7%  |
| BC100524 | 0.00985234  | 0.02 | 223.6% |
| BC100530 | 0           | 0.00 |        |
| BC100534 | 0.1657549   | 0.14 | 84.4%  |

|          |             |       |        |
|----------|-------------|-------|--------|
| BC100589 | 0           | 0.00  |        |
| BC106127 | 0.9432384   | 0.10  | 10.6%  |
| BC107230 | 0           | 0.00  |        |
| BC107309 | 0           | 0.00  |        |
| BC107310 | 0.011631946 | 0.01  | 113.9% |
| BC107364 | 0           | 0.00  |        |
| BC108272 | 0           | 0.00  |        |
| BC108341 | 0.09797026  | 0.03  | 26.5%  |
| BC109180 | 0.0028497   | 0.01  | 223.6% |
| BC112410 | 1.335538    | 0.16  | 11.6%  |
| BC113126 | 0.00337312  | 0.01  | 223.6% |
| BC114417 | 0.453286    | 0.19  | 42.8%  |
| BC114580 | 0           | 0.00  |        |
| BC115444 | 0           | 0.00  |        |
| BC115953 | 1.858054    | 0.30  | 15.9%  |
| BC115961 | 0.011344558 | 0.01  | 112.8% |
| BC116234 | 3.680772    | 0.30  | 8.2%   |
| BC116340 | 0           | 0.00  |        |
| BC117090 | 0           | 0.00  |        |
| BC119421 | 0           | 0.00  |        |
| BC119519 | 0.0022126   | 0.00  | 223.6% |
| BC120798 | 0           | 0.00  |        |
| BC125002 | 0.03379968  | 0.02  | 69.2%  |
| BC126883 | 0           | 0.00  |        |
| BC126955 | 0.0147665   | 0.03  | 223.6% |
| BC127131 | 0.3945246   | 0.14  | 35.1%  |
| BC128282 | 0.08861622  | 0.02  | 23.3%  |
| BC128327 | 0.596028    | 0.17  | 28.3%  |
| BC134356 | 187.024     | 29.46 | 15.8%  |
| BC141885 | 0           | 0.00  |        |
| BC145649 | 0.06395078  | 0.03  | 52.0%  |
| BC145724 | 0.2758424   | 0.04  | 14.4%  |
| BC145794 | 0.01617452  | 0.02  | 137.9% |
| BC145836 | 0           | 0.00  |        |
| BC152372 | 0.0654182   | 0.09  | 139.7% |
| Bcam     | 12.00746    | 1.49  | 12.4%  |
| Bcan     | 19.32954    | 2.80  | 14.5%  |
| Bcap29   | 18.90674    | 1.54  | 8.1%   |
| Bcap31   | 42.2837     | 1.77  | 4.2%   |
| Bcap37   | 0.770515    | 0.18  | 23.2%  |
| Bcar1    | 11.27284    | 0.28  | 2.5%   |
| Bcar3    | 0.4956438   | 0.11  | 21.7%  |
| Bcas1    | 0.479       | 0.17  | 34.9%  |
| Bcas2    | 30.29728    | 1.27  | 4.2%   |
| Bcas3    | 14.41952    | 1.21  | 8.4%   |
| Bcat1    | 10.03622    | 0.29  | 2.8%   |
| Bcat2    | 4.350646    | 0.26  | 6.0%   |

|         |            |      |        |
|---------|------------|------|--------|
| Bccip   | 12.65584   | 0.66 | 5.2%   |
| Bcdin3d | 1.849486   | 0.28 | 15.3%  |
| Bcdo2   | 0.0663642  | 0.05 | 78.7%  |
| Bche    | 1.557486   | 0.08 | 5.3%   |
| Bckdha  | 12.66172   | 0.60 | 4.7%   |
| Bckdhb  | 18.9571    | 1.14 | 6.0%   |
| Bckdk   | 6.18231    | 0.33 | 5.3%   |
| Bcl10   | 4.519352   | 0.28 | 6.1%   |
| Bcl11a  | 24.83088   | 0.81 | 3.3%   |
| Bcl11b  | 1.957344   | 0.22 | 11.5%  |
| Bcl2    | 2.614974   | 0.13 | 4.9%   |
| Bcl2a1a | 0          | 0.00 |        |
| Bcl2a1b | 0          | 0.00 |        |
| Bcl2a1c | 0          | 0.00 |        |
| Bcl2a1d | 0          | 0.00 |        |
| Bcl2l1  | 21.01832   | 0.81 | 3.8%   |
| Bcl2l10 | 0          | 0.00 |        |
| Bcl2l11 | 3.840196   | 0.70 | 18.3%  |
| Bcl2l12 | 0.5008484  | 0.06 | 13.0%  |
| Bcl2l13 | 8.1617     | 0.19 | 2.4%   |
| Bcl2l14 | 0.00946    | 0.01 | 154.4% |
| Bcl2l2  | 31.9122    | 2.09 | 6.6%   |
| Bcl3    | 0.1696492  | 0.05 | 30.7%  |
| Bcl6    | 4.480082   | 0.36 | 8.1%   |
| Bcl6b   | 0.06711192 | 0.04 | 60.2%  |
| Bcl7a   | 13.76156   | 0.69 | 5.0%   |
| Bcl7b   | 11.40716   | 0.38 | 3.3%   |
| BCL7B   | 1.0182292  | 0.23 | 22.7%  |
| Bcl7c   | 5.324116   | 0.62 | 11.6%  |
| Bcl9    | 8.665352   | 0.49 | 5.7%   |
| Bcl9l   | 5.738828   | 0.59 | 10.4%  |
| Bclaf1  | 27.76764   | 1.66 | 6.0%   |
| Bclp2   | 0.00692992 | 0.02 | 223.6% |
| Bcmo1   | 0.00250276 | 0.01 | 223.6% |
| Bcng-1  | 0.0137845  | 0.00 | 18.9%  |
| Bcor    | 4.348068   | 0.33 | 7.5%   |
| Bcorl1  | 3.113042   | 0.16 | 5.0%   |
| Bcr     | 10.89412   | 0.31 | 2.8%   |
| Bcs1l   | 6.078186   | 0.29 | 4.7%   |
| Bdh1    | 37.68262   | 5.04 | 13.4%  |
| Bdh2    | 0.5360672  | 0.11 | 20.0%  |
| Bdkrb1  | 0          | 0.00 |        |
| Bdkrb2  | 0.09404568 | 0.02 | 19.6%  |
| Bdnf    | 8.01955    | 0.79 | 9.8%   |
| Bdp1    | 4.526686   | 0.27 | 6.1%   |
| Bean    | 4.81645    | 0.34 | 7.1%   |
| Becn1   | 26.92972   | 1.26 | 4.7%   |

|           |             |      |        |
|-----------|-------------|------|--------|
| Begain    | 44.4126     | 3.10 | 7.0%   |
| Best1     | 0.0028322   | 0.01 | 223.6% |
| Best2     | 0.01402318  | 0.02 | 115.7% |
| Best3     | 0.01469822  | 0.01 | 72.7%  |
| Bet1      | 13.35944    | 0.52 | 3.9%   |
| Bet1l     | 11.40162    | 0.69 | 6.0%   |
| Bex1      | 30.86212    | 2.80 | 9.1%   |
| Bex2      | 198.3306    | 8.40 | 4.2%   |
| Bex4      | 4.62126     | 0.54 | 11.8%  |
| Bex6      | 0           | 0.00 |        |
| Bfar      | 14.29624    | 0.41 | 2.9%   |
| Bfsp1     | 0.04238102  | 0.03 | 59.6%  |
| Bfsp2     | 0.04167794  | 0.04 | 104.3% |
| Bglap1    | 0.01484374  | 0.03 | 223.6% |
| Bglap2    | 0           | 0.00 |        |
| Bglap-rs1 | 0           | 0.00 |        |
| Bgn       | 12.700682   | 2.70 | 21.2%  |
| Bhlhb2    | 9.473894    | 1.94 | 20.5%  |
| Bhlhb3    | 5.13154     | 1.04 | 20.3%  |
| Bhlhb4    | 0.03980528  | 0.05 | 123.2% |
| Bhlhb5    | 2.802566    | 0.18 | 6.3%   |
| Bhlhb8    | 0.03739448  | 0.01 | 24.5%  |
| Bhlhb9    | 37.86532    | 1.66 | 4.4%   |
| Bhmt      | 0           | 0.00 |        |
| BHMT      | 0           | 0.00 |        |
| Bhmt2     | 0.0189905   | 0.01 | 50.7%  |
| Bicc1     | 1.973134    | 0.22 | 11.1%  |
| Bicd1     | 13.76792    | 1.07 | 7.8%   |
| Bicd2     | 11.00014    | 0.50 | 4.6%   |
| Bid       | 8.66568     | 0.47 | 5.4%   |
| Bik       | 0.02262282  | 0.03 | 147.8% |
| Bin1      | 42.03722    | 1.42 | 3.4%   |
| Bin3      | 3.210428    | 0.19 | 5.8%   |
| Birc1f    | 0.022349672 | 0.01 | 50.1%  |
| Birc2     | 10.063892   | 0.37 | 3.6%   |
| Birc3     | 0.357463    | 0.05 | 13.0%  |
| Birc4     | 13.62656    | 0.79 | 5.8%   |
| Birc5     | 1.337503    | 0.26 | 19.5%  |
| Birc6     | 12.82112    | 1.15 | 9.0%   |
| Birc7     | 0           | 0.00 |        |
| Bivm      | 13.01274    | 0.39 | 3.0%   |
| Blcap     | 58.04648    | 2.16 | 3.7%   |
| Blk       | 0.01095946  | 0.02 | 223.6% |
| Blm       | 2.998356    | 0.13 | 4.3%   |
| Blmh      | 42.91476    | 2.14 | 5.0%   |
| Blnk      | 0           | 0.00 |        |
| Bloc1s1   | 7.515364    | 0.78 | 10.3%  |



|         |             |      |        |
|---------|-------------|------|--------|
| Bloc1s2 | 10.542442   | 0.70 | 6.7%   |
| Bloc1s3 | 6.029612    | 0.47 | 7.8%   |
| Blr1    | 0.00425351  | 0.01 | 137.4% |
| Blvra   | 5.480458    | 0.59 | 10.8%  |
| Blvrb   | 4.858056    | 0.66 | 13.6%  |
| Blzf1   | 9.339542    | 4.29 | 46.0%  |
| bmal1b  | 0.1610088   | 0.03 | 19.1%  |
| Bmf     | 0.5489562   | 0.12 | 21.3%  |
| Bmi1    | 7.876676    | 0.85 | 10.8%  |
| Bmp1    | 3.198306    | 0.46 | 14.4%  |
| Bmp10   | 0           | 0.00 |        |
| Bmp15   | 0.0263332   | 0.01 | 45.4%  |
| Bmp2    | 1.213922    | 0.21 | 17.4%  |
| Bmp2k   | 2.158576    | 0.15 | 7.2%   |
| Bmp3    | 0.9621096   | 0.14 | 14.3%  |
| Bmp4    | 1.356014    | 0.23 | 16.9%  |
| Bmp5    | 0.0690232   | 0.04 | 51.6%  |
| Bmp6    | 0.5084228   | 0.09 | 17.7%  |
| Bmp7    | 2.713472    | 0.24 | 9.0%   |
| Bmp8a   | 0.02670888  | 0.02 | 87.4%  |
| Bmp8b   | 0.05704254  | 0.01 | 16.1%  |
| Bmper   | 6.687552    | 0.52 | 7.8%   |
| Bmpr1a  | 10.62828    | 0.44 | 4.1%   |
| Bmpr1b  | 1.011219    | 0.08 | 8.3%   |
| Bmpr2   | 19.32776    | 1.45 | 7.5%   |
| bMRP64  | 0.3829838   | 0.16 | 40.6%  |
| Bms1    | 5.532596    | 0.42 | 7.5%   |
| Bmx     | 0.01032094  | 0.02 | 154.3% |
| Bmyc    | 30.3465     | 2.46 | 8.1%   |
| Bnc1    | 0.022190726 | 0.01 | 60.1%  |
| Bnc2    | 0.3528698   | 0.11 | 31.8%  |
| Bnip1   | 8.256082    | 1.01 | 12.3%  |
| Bnip2   | 7.554266    | 0.65 | 8.6%   |
| Bnip3   | 35.72546    | 5.51 | 15.4%  |
| Bnip3l  | 15.37456    | 0.75 | 4.9%   |
| Bnipl   | 0.05026162  | 0.04 | 72.2%  |
| Boc     | 2.136966    | 0.32 | 14.8%  |
| Bok     | 5.05673     | 0.82 | 16.1%  |
| Bola1   | 6.678256    | 0.50 | 7.4%   |
| Bola2   | 24.39468    | 2.13 | 8.7%   |
| Bola3   | 7.01987     | 0.40 | 5.7%   |
| Boll    | 0.00906274  | 0.02 | 223.6% |
| Bop1    | 11.93328    | 1.97 | 16.5%  |
| Bpag1   | 17.75536    | 1.01 | 5.7%   |
| Bpag1-n | 0.09555828  | 0.01 | 7.6%   |
| Bpgm    | 11.13582    | 1.87 | 16.8%  |
| Bphl    | 9.84384     | 0.60 | 6.0%   |

|         |             |      |        |
|---------|-------------|------|--------|
| Bpi     | 0           | 0.00 |        |
| Bpil1   | 0           | 0.00 |        |
| Bpil2   | 0.16393684  | 0.07 | 45.2%  |
| Bpil3   | 0           | 0.00 |        |
| Bpnt1   | 22.94506    | 1.48 | 6.4%   |
| BPOZ    | 1.2886246   | 0.39 | 30.1%  |
| Bptf    | 11.89404    | 0.81 | 6.8%   |
| Braf    | 17.15614    | 1.11 | 6.5%   |
| Brap    | 9.72354     | 0.36 | 3.7%   |
| Brca1   | 0.5439472   | 0.06 | 11.3%  |
| Brca2   | 0.8505276   | 0.15 | 17.7%  |
| Brcc3   | 13.46522    | 1.10 | 8.2%   |
| Brctd1  | 3.33293     | 0.38 | 11.5%  |
| Brd1    | 0.3065352   | 0.06 | 21.0%  |
| Brd2    | 48.6478     | 1.77 | 3.6%   |
| Brd3    | 19.10898    | 3.21 | 16.8%  |
| Brd4    | 18.76646    | 0.99 | 5.3%   |
| Brd7    | 12.2736     | 0.75 | 6.1%   |
| Brd8    | 13.72402    | 0.38 | 2.8%   |
| Brd9    | 14.74728    | 0.43 | 2.9%   |
| Brdt    | 0.975277    | 0.04 | 3.9%   |
| Bre     | 32.05068    | 2.97 | 9.3%   |
| Brf1    | 6.573318    | 0.23 | 3.4%   |
| Brf2    | 6.566392    | 0.70 | 10.6%  |
| Bri3    | 8.110148    | 0.89 | 10.9%  |
| Bri3bp  | 31.56276    | 1.08 | 3.4%   |
| Brip1   | 0.09536624  | 0.02 | 17.4%  |
| Brms1   | 4.075936    | 0.79 | 19.3%  |
| Brms1l  | 12.36778    | 0.54 | 4.4%   |
| Brp16   | 4.557886    | 0.18 | 3.9%   |
| Brp44   | 44.72836    | 1.33 | 3.0%   |
| Brp44l  | 7.872688    | 0.56 | 7.2%   |
| Brpf1   | 4.919188    | 0.42 | 8.4%   |
| Brpf3   | 4.218814    | 0.20 | 4.7%   |
| Brs3    | 0.00584498  | 0.01 | 137.6% |
| Brsk1   | 60.04292    | 3.25 | 5.4%   |
| Brsk2   | 28.06386    | 1.18 | 4.2%   |
| Bru14   | 13.341458   | 3.96 | 29.7%  |
| Bruno14 | 62.5624     | 0.90 | 1.4%   |
| Bruno15 | 0.351501    | 0.08 | 23.1%  |
| Bruno16 | 9.354828    | 0.86 | 9.2%   |
| Brwd1   | 30.26658    | 2.04 | 6.7%   |
| Brwd2   | 12.45238    | 0.43 | 3.5%   |
| Brwd3   | 1.533458    | 0.09 | 5.9%   |
| BSAC2A  | 0.001718039 | 0.00 | 119.9% |
| Bscl2   | 67.26912    | 2.38 | 3.5%   |
| Bsdc1   | 12.95126    | 0.42 | 3.3%   |

|         |             |      |        |
|---------|-------------|------|--------|
| Bsg     | 225.0836    | 7.37 | 3.3%   |
| Bsn     | 7.846538    | 0.52 | 6.7%   |
| Bsnd    | 0           | 0.00 |        |
| Bspry   | 0.5152168   | 0.09 | 17.8%  |
| Bst1    | 0.1835852   | 0.05 | 28.6%  |
| Bst2    | 0.9624126   | 0.23 | 24.2%  |
| Bsx     | 0           | 0.00 |        |
| Btaf1   | 3.99821     | 0.18 | 4.6%   |
| Btbd1   | 12.78678    | 0.54 | 4.2%   |
| Btbd10  | 13.26388    | 1.25 | 9.4%   |
| Btbd11  | 16.98874    | 0.33 | 2.0%   |
| Btbd12  | 4.872848    | 0.47 | 9.6%   |
| Btbd14a | 27.81262    | 2.24 | 8.1%   |
| Btbd14b | 18.65368    | 0.56 | 3.0%   |
| Btbd16  | 0           | 0.00 |        |
| Btbd2   | 44.60142    | 3.56 | 8.0%   |
| Btbd3   | 15.92266    | 0.99 | 6.2%   |
| Btbd6   | 9.054256    | 0.40 | 4.4%   |
| Btbd7   | 3.19198     | 0.27 | 8.5%   |
| Btbd9   | 16.26892    | 1.58 | 9.7%   |
| Btc     | 0.0227965   | 0.02 | 67.7%  |
| Btd     | 3.499716    | 0.54 | 15.4%  |
| Btf3    | 7.447216    | 4.71 | 63.3%  |
| Btf3l4  | 6.274022    | 0.27 | 4.3%   |
| Btg1    | 13.72162    | 0.93 | 6.8%   |
| Btg2    | 3.485962    | 0.26 | 7.4%   |
| Btg3    | 0.09657092  | 0.08 | 87.4%  |
| Btg4    | 0.01458292  | 0.03 | 223.6% |
| Btk     | 0           | 0.00 |        |
| Btla    | 0.0704732   | 0.02 | 34.0%  |
| Btn1a1  | 0.2188776   | 0.04 | 17.6%  |
| Btn2a2  | 0.08115012  | 0.05 | 64.5%  |
| Btnl1   | 0           | 0.00 |        |
| Btnl2   | 0           | 0.00 |        |
| Btnl7   | 0.03716022  | 0.03 | 72.8%  |
| Btnl9   | 0.00238808  | 0.01 | 223.6% |
| Btrc    | 32.77616    | 0.41 | 1.2%   |
| Bub1    | 0.4952956   | 0.06 | 11.4%  |
| Bub1b   | 0.5632502   | 0.10 | 18.0%  |
| Bub3    | 20.51318    | 0.98 | 4.8%   |
| Bud13   | 2.97145     | 0.28 | 9.3%   |
| Bud31   | 27.7697     | 1.66 | 6.0%   |
| Butr1   | 0.001503464 | 0.00 | 223.6% |
| Bves    | 1.066439    | 0.17 | 16.2%  |
| Bxdc1   | 3.291222    | 0.44 | 13.5%  |
| Bxdc2   | 11.45826    | 0.41 | 3.5%   |
| Bxdc5   | 5.862224    | 0.52 | 9.0%   |

|               |            |      |        |
|---------------|------------|------|--------|
| BY080835      | 0.33971    | 0.07 | 20.9%  |
| Bysl          | 6.710812   | 1.07 | 15.9%  |
| Bzrap1        | 15.5237    | 0.85 | 5.5%   |
| Bzrpl1        | 0          | 0.00 |        |
| Bzw1          | 65.95318   | 7.79 | 11.8%  |
| Bzw2          | 25.53142   | 3.72 | 14.6%  |
| C030003D03Rik | 2.547504   | 0.25 | 9.8%   |
| C030006K11Rik | 5.595954   | 0.30 | 5.4%   |
| C030011J08Rik | 0.01643358 | 0.00 | 22.7%  |
| C030011O14Rik | 35.95356   | 3.44 | 9.6%   |
| C030014K22Rik | 6.606192   | 0.32 | 4.8%   |
| C030014M07Rik | 19.49736   | 2.20 | 11.3%  |
| C030017K20Rik | 0.0464712  | 0.02 | 32.5%  |
| C030018G13Rik | 5.535938   | 0.90 | 16.2%  |
| C030019F02Rik | 3.46513    | 0.33 | 9.6%   |
| C030019I05Rik | 0.07926796 | 0.04 | 45.4%  |
| C030027K23Rik | 0.4480594  | 0.08 | 17.5%  |
| C030030A07Rik | 1.390944   | 0.19 | 13.7%  |
| C030039L03Rik | 3.932366   | 0.18 | 4.6%   |
| C030045D06Rik | 0.331251   | 0.12 | 35.6%  |
| C030046E11Rik | 11.52054   | 0.70 | 6.1%   |
| C030046I01Rik | 54.72034   | 5.81 | 10.6%  |
| C030048B08Rik | 2.25716    | 0.29 | 12.8%  |
| C130022K22Rik | 6.22431    | 0.31 | 5.0%   |
| C130023O10Rik | 0          | 0.00 |        |
| C130026I21Rik | 0          | 0.00 |        |
| C130026L21Rik | 0.5098534  | 0.08 | 15.2%  |
| C130032J12Rik | 9.32613    | 0.41 | 4.4%   |
| C130034I18Rik | 0.08803288 | 0.04 | 50.5%  |
| C130038G02Rik | 4.877416   | 0.29 | 5.9%   |
| C130039O16Rik | 2.307236   | 0.28 | 12.2%  |
| C130050O18Rik | 0.02140524 | 0.03 | 134.9% |
| C130057D23Rik | 0.00723124 | 0.02 | 223.6% |
| C130060K24Rik | 0.2633624  | 0.06 | 20.9%  |
| C130069I09Rik | 0.3275302  | 0.10 | 31.3%  |
| C130073F10Rik | 0.01478168 | 0.02 | 141.3% |
| C130074G19Rik | 0.255865   | 0.04 | 14.2%  |
| C130076O07Rik | 16.85994   | 0.77 | 4.6%   |
| C130079G13Rik | 0          | 0.00 |        |
| C130090K23Rik | 0.2506862  | 0.07 | 26.6%  |
| C184          | 0.3339976  | 0.13 | 38.0%  |
| C1d           | 19.24502   | 1.36 | 7.1%   |
| C1galt1       | 5.13195    | 0.32 | 6.3%   |
| C1galt1c1     | 10.08002   | 0.68 | 6.8%   |
| C1qa          | 0          | 0.00 |        |
| C1qb          | 0          | 0.00 |        |
| C1qbp         | 31.4963    | 0.95 | 3.0%   |

|               |             |      |        |
|---------------|-------------|------|--------|
| C1qc          | 0           | 0.00 |        |
| C1qdc2        | 0.4206002   | 0.13 | 31.0%  |
| C1ql1         | 2.776306    | 0.56 | 20.1%  |
| C1ql2         | 2.24886     | 0.46 | 20.4%  |
| C1ql3         | 7.29172     | 0.41 | 5.6%   |
| C1ql4         | 1.3943776   | 0.45 | 32.1%  |
| C1qtnf1       | 0.0633709   | 0.02 | 33.4%  |
| C1qtnf2       | 0.12584138  | 0.09 | 69.6%  |
| C1qtnf3       | 0.577784    | 0.24 | 41.0%  |
| C1qtnf4       | 14.97476    | 0.74 | 4.9%   |
| C1qtnf5       | 0.09186592  | 0.05 | 49.7%  |
| C1qtnf6       | 4.181216    | 0.61 | 14.5%  |
| C1qtnf7       | 0.2775418   | 0.04 | 14.9%  |
| C1qtnf9       | 0.01501986  | 0.01 | 63.3%  |
| C1r           | 0.3802546   | 0.16 | 43.3%  |
| C1rb          | 0.08494608  | 0.03 | 36.2%  |
| C1rl          | 0.08496144  | 0.05 | 59.5%  |
| C1s           | 0.9450538   | 0.36 | 38.1%  |
| C2            | 0.13894316  | 0.04 | 30.5%  |
| C21orf63      | 0.02367924  | 0.01 | 36.0%  |
| C21orf66      | 12.72452    | 0.85 | 6.7%   |
| C21orf80      | 0.3940676   | 0.09 | 21.8%  |
| C21orf83      | 0.3371534   | 0.19 | 55.6%  |
| C230004F18Rik | 4.026816    | 0.48 | 11.8%  |
| C230021P08Rik | 10.159224   | 0.68 | 6.7%   |
| C230029F24Rik | 0           | 0.00 |        |
| C230052I12Rik | 1.281054    | 0.15 | 11.9%  |
| C230055K05Rik | 0.07541916  | 0.04 | 52.4%  |
| C230071H18Rik | 0.033291    | 0.03 | 96.4%  |
| C230078M08Rik | 1.0566232   | 0.22 | 20.5%  |
| C230078M14Rik | 5.0711      | 0.51 | 10.1%  |
| C230081A13Rik | 0.08397728  | 0.06 | 69.9%  |
| C230093N12Rik | 9.973796    | 0.51 | 5.1%   |
| C230094A16Rik | 6.901112    | 0.41 | 5.9%   |
| C230095G01Rik | 0.00410153  | 0.01 | 138.7% |
| C230096C10Rik | 19.30626    | 4.15 | 21.5%  |
| C230097I24Rik | 0.3767212   | 0.12 | 31.2%  |
| C2ta          | 0.002310305 | 0.00 | 150.8% |
| C3            | 0.07107484  | 0.05 | 67.2%  |
| C330001K17Rik | 0.7217074   | 0.06 | 8.8%   |
| C330002I19Rik | 62.71848    | 4.02 | 6.4%   |
| C330005M16Rik | 0.14494826  | 0.05 | 34.1%  |
| C330006K01Rik | 4.910926    | 0.34 | 7.0%   |
| C330007P06Rik | 6.30148     | 0.22 | 3.5%   |
| C330011K17Rik | 1.971636    | 0.18 | 9.0%   |
| C330016O10Rik | 2.638126    | 0.41 | 15.5%  |
| C330018D20Rik | 2.623598    | 0.20 | 7.8%   |

|               |             |      |        |
|---------------|-------------|------|--------|
| C330019G07Rik | 6.489874    | 0.12 | 1.9%   |
| C330019L16Rik | 0.698011    | 0.06 | 9.0%   |
| C330021F23Rik | 2.440234    | 0.57 | 23.3%  |
| C330023M02Rik | 14.89506    | 1.00 | 6.7%   |
| C330024D12Rik | 0.0101141   | 0.02 | 223.6% |
| C330027C09Rik | 1.303184    | 0.08 | 6.3%   |
| C330043M08Rik | 0.7949242   | 0.07 | 9.4%   |
| C330046G03Rik | 0.07057164  | 0.03 | 41.8%  |
| C3ar1         | 0.0110841   | 0.01 | 118.3% |
| C430003P19Rik | 11.7556     | 0.91 | 7.8%   |
| C430004E15Rik | 3.096932    | 0.07 | 2.2%   |
| C430014M02Rik | 1.978348    | 0.18 | 9.0%   |
| C430048L16Rik | 2.688198    | 0.32 | 12.1%  |
| C4a           | 0.1750324   | 0.06 | 34.5%  |
| C4b           | 0.324224    | 0.03 | 9.1%   |
| C4bp          | 0.03533294  | 0.03 | 71.6%  |
| C530008M07Rik | 0.06123586  | 0.02 | 27.3%  |
| C530008M17Rik | 4.9181      | 0.55 | 11.2%  |
| C530028I08Rik | 0.6580488   | 0.12 | 17.9%  |
| C530028O21Rik | 29.40886    | 1.24 | 4.2%   |
| C530043G21Rik | 28.793      | 0.39 | 1.3%   |
| C530044N13Rik | 5.711564    | 0.15 | 2.7%   |
| C5ar1         | 0.11162548  | 0.05 | 44.7%  |
| C6            | 0           | 0.00 |        |
| C630004H02Rik | 30.2157     | 0.80 | 2.6%   |
| C630007B19Rik | 13.06058    | 0.59 | 4.5%   |
| C630028N24Rik | 0.8511444   | 0.11 | 13.5%  |
| C630035N08Rik | 9.68775     | 0.74 | 7.6%   |
| C630041L24Rik | 0.01635964  | 0.02 | 112.7% |
| C730007P19Rik | 0           | 0.00 |        |
| C730025P13Rik | 5.79893     | 0.70 | 12.1%  |
| C730027E14Rik | 0.0175563   | 0.02 | 93.3%  |
| C730027J19Rik | 0.02498136  | 0.03 | 105.3% |
| C730027P07Rik | 0.05283004  | 0.03 | 49.5%  |
| C730034F03Rik | 0.2587812   | 0.07 | 26.1%  |
| C730036D15Rik | 0.0047715   | 0.01 | 223.6% |
| C730048C13Rik | 0.003710655 | 0.01 | 215.3% |
| C76566        | 1.456854    | 0.20 | 13.8%  |
| C77080        | 13.14444    | 1.84 | 14.0%  |
| C77370        | 1.0914454   | 0.25 | 23.2%  |
| C78339        | 15.30622    | 1.62 | 10.6%  |
| C78409        | 1.985604    | 0.39 | 19.4%  |
| C79127        | 0.1745834   | 0.04 | 22.4%  |
| C79267        | 3.9802      | 0.29 | 7.3%   |
| C79407        | 0.5122206   | 0.07 | 13.7%  |
| C80913        | 17.59106    | 0.86 | 4.9%   |
| C85492        | 14.26076    | 0.94 | 6.6%   |

|               |             |      |        |
|---------------|-------------|------|--------|
| C85627        | 0.00475806  | 0.01 | 223.6% |
| C86695        | 0           | 0.00 |        |
| C87414        | 0           | 0.00 |        |
| C87436        | 4.357026    | 0.44 | 10.0%  |
| C87499        | 0           | 0.00 |        |
| C8a           | 0.001666806 | 0.00 | 223.6% |
| C8b           | 0.04166204  | 0.03 | 65.5%  |
| C8g           | 1.0319614   | 0.25 | 24.0%  |
| C9            | 0.00519218  | 0.01 | 223.6% |
| C920005C14Rik | 0.1452776   | 0.02 | 13.3%  |
| C920006C10Rik | 25.9769     | 3.39 | 13.0%  |
| C920016K16Rik | 6.792734    | 0.45 | 6.6%   |
| Cab39         | 52.0194     | 1.35 | 2.6%   |
| Cab39l        | 5.246716    | 0.23 | 4.4%   |
| Cabc1         | 8.355944    | 1.18 | 14.1%  |
| Cabin1        | 12.301834   | 1.88 | 15.3%  |
| Cables1       | 2.107686    | 0.15 | 7.1%   |
| Cables2       | 8.446534    | 0.57 | 6.8%   |
| Cabp1         | 21.2691     | 1.97 | 9.3%   |
| Cabp2         | 0           | 0.00 |        |
| Cabp4         | 0.1785132   | 0.04 | 23.5%  |
| Cabp5         | 0.02724404  | 0.01 | 26.5%  |
| Cabp7         | 3.856968    | 1.01 | 26.1%  |
| Cabyr         | 1.0241816   | 0.21 | 20.7%  |
| Cachd1        | 11.85576    | 0.13 | 1.1%   |
| Cacna1a       | 18.84142    | 1.06 | 5.6%   |
| Cacna1b       | 10.296098   | 0.40 | 3.9%   |
| Cacna1c       | 3.283196    | 0.28 | 8.4%   |
| Cacna1d       | 2.668108    | 0.06 | 2.2%   |
| cacna1d       | 0.6395856   | 0.23 | 35.3%  |
| Cacna1e       | 2.00191     | 0.19 | 9.6%   |
| Cacna1f       | 0.023997436 | 0.02 | 71.1%  |
| Cacna1g       | 4.091266    | 0.40 | 9.9%   |
| Cacna1h       | 2.33977     | 0.41 | 17.5%  |
| Cacna1i       | 1.760804    | 0.24 | 13.7%  |
| Cacna1s       | 0.00217104  | 0.00 | 138.6% |
| Cacna2d1      | 16.37378    | 0.97 | 5.9%   |
| Cacna2d2      | 18.70052    | 0.88 | 4.7%   |
| Cacna2d3      | 8.87771     | 0.49 | 5.5%   |
| Cacna2d4      | 0.181876    | 0.03 | 17.8%  |
| Cacnb1        | 15.89976    | 0.75 | 4.7%   |
| Cacnb2        | 2.56098     | 0.35 | 13.8%  |
| Cacnb3        | 15.69302    | 1.82 | 11.6%  |
| Cacnb4        | 15.19204    | 1.50 | 9.9%   |
| Cacng1        | 0           | 0.00 |        |
| Cacng2        | 25.98072    | 1.35 | 5.2%   |
| Cacng3        | 18.64872    | 1.63 | 8.8%   |

|                 |            |       |        |
|-----------------|------------|-------|--------|
| Cacng4          | 16.44202   | 3.91  | 23.8%  |
| Cacng5          | 6.464152   | 0.45  | 7.0%   |
| Cacng6          | 0.02726172 | 0.04  | 152.4% |
| Cacng7          | 55.51874   | 3.53  | 6.4%   |
| Cacng8          | 5.993492   | 0.67  | 11.1%  |
| Cacybp          | 52.9613    | 3.76  | 7.1%   |
| Cad             | 4.431868   | 0.23  | 5.3%   |
| Cadm1           | 26.18688   | 0.74  | 2.8%   |
| Cadm2           | 43.88658   | 1.91  | 4.3%   |
| Cadm3           | 92.23622   | 1.40  | 1.5%   |
| Cadm4           | 82.267     | 5.92  | 7.2%   |
| Cadps           | 82.74876   | 1.39  | 1.7%   |
| Cadps2          | 3.285718   | 0.26  | 8.0%   |
| Cage1           | 0.4065778  | 0.05  | 12.3%  |
| Calb1           | 10.27411   | 0.82  | 8.0%   |
| Calb2           | 15.84312   | 1.45  | 9.2%   |
| Calca           | 19.40314   | 4.11  | 21.2%  |
| Calcb           | 0.1627122  | 0.10  | 60.5%  |
| calcium_channel | 0.2785842  | 0.11  | 40.6%  |
| Calcoco1        | 11.441922  | 1.47  | 12.9%  |
| Calcoco2        | 0          | 0.00  |        |
| Calcr           | 0.7212938  | 0.12  | 16.4%  |
| Calcr1          | 1.89887    | 0.18  | 9.6%   |
| Cald1           | 15.64762   | 1.66  | 10.6%  |
| Calm1           | 556.463    | 10.31 | 1.9%   |
| Calm2           | 315.9716   | 19.13 | 6.1%   |
| Calm3           | 603.6144   | 28.56 | 4.7%   |
| Calm4           | 0          | 0.00  |        |
| Calm5           | 0          | 0.00  |        |
| Calm13          | 0.02358706 | 0.02  | 101.3% |
| Calm14          | 0.1786238  | 0.07  | 41.5%  |
| Caln1           | 16.60036   | 1.34  | 8.1%   |
| calp80          | 0.321138   | 0.09  | 28.4%  |
| Calr            | 175.1958   | 7.38  | 4.2%   |
| Calr3           | 0.914887   | 0.09  | 9.7%   |
| Calr4           | 0.1165866  | 0.04  | 35.2%  |
| Calu            | 42.7225    | 1.42  | 3.3%   |
| Camk1           | 7.284892   | 0.51  | 6.9%   |
| Camk1d          | 14.04388   | 0.71  | 5.0%   |
| Camk1g          | 13.76628   | 0.80  | 5.8%   |
| Camk2a          | 4.03458    | 0.64  | 16.0%  |
| Camk2b          | 107.09824  | 5.21  | 4.9%   |
| Camk2d          | 81.81252   | 1.57  | 1.9%   |
| Camk2g          | 73.6673    | 3.63  | 4.9%   |
| Camk2n1         | 54.82786   | 3.62  | 6.6%   |
| Camk2n2         | 117.5138   | 7.88  | 6.7%   |
| Camk4           | 12.93938   | 0.83  | 6.4%   |



|            |            |      |        |
|------------|------------|------|--------|
| Camkk1     | 18.4143    | 1.62 | 8.8%   |
| Camkk2     | 8.062674   | 0.25 | 3.1%   |
| Camkv      | 2.690296   | 0.17 | 6.2%   |
| Caml       | 17.20996   | 1.91 | 11.1%  |
| Camp       | 0          | 0.00 |        |
| cAMP-GEFII | 0.2131389  | 0.08 | 36.9%  |
| Camsap1    | 18.9024    | 1.28 | 6.8%   |
| Camsap111  | 26.74484   | 0.91 | 3.4%   |
| Camta1     | 53.85298   | 2.63 | 4.9%   |
| Camta2     | 26.94628   | 1.78 | 6.6%   |
| Cand1      | 41.80242   | 1.07 | 2.5%   |
| Cand2      | 1.78736    | 0.04 | 2.2%   |
| Cant1      | 12.53976   | 0.34 | 2.7%   |
| Canx       | 184.747    | 5.14 | 2.8%   |
| Cap        | 0.6340066  | 0.19 | 29.4%  |
| Cap1       | 56.61758   | 3.22 | 5.7%   |
| Cap2       | 1.461058   | 0.12 | 8.1%   |
| Caper      | 8.813488   | 2.06 | 23.3%  |
| Capg       | 0.13471344 | 0.06 | 43.7%  |
| Capn1      | 5.111698   | 0.76 | 14.9%  |
| Capn10     | 8.388956   | 0.35 | 4.2%   |
| Capn11     | 0.03997266 | 0.02 | 42.4%  |
| capn12     | 0.17777562 | 0.18 | 98.7%  |
| Capn12     | 0.15185408 | 0.15 | 99.2%  |
| Capn13     | 0.03174914 | 0.04 | 119.6% |
| Capn2      | 24.36238   | 1.02 | 4.2%   |
| Capn3      | 0.9207456  | 0.39 | 42.0%  |
| Capn5      | 17.02078   | 1.02 | 6.0%   |
| Capn6      | 5.35171    | 1.20 | 22.5%  |
| Capn7      | 15.64092   | 1.22 | 7.8%   |
| Capn8      | 0.01772672 | 0.01 | 82.8%  |
| Capn9      | 0.01685318 | 0.02 | 112.5% |
| Capns1     | 96.24558   | 5.02 | 5.2%   |
| Caprin1    | 84.93396   | 1.37 | 1.6%   |
| Caprin2    | 3.282736   | 0.21 | 6.4%   |
| Caps2      | 0.1654918  | 0.05 | 28.0%  |
| Capsl      | 0.06785294 | 0.05 | 75.8%  |
| Capza1     | 3.227928   | 0.31 | 9.7%   |
| Capza2     | 86.37798   | 2.21 | 2.6%   |
| Capza3     | 0.01155452 | 0.02 | 141.2% |
| Capzb      | 79.06262   | 3.60 | 4.6%   |
| Car1       | 0.0407297  | 0.03 | 63.6%  |
| Car10      | 63.12042   | 4.37 | 6.9%   |
| Car11      | 14.04582   | 0.54 | 3.8%   |
| Car12      | 0.4462672  | 0.18 | 39.5%  |
| Car13      | 0.212628   | 0.05 | 22.4%  |
| Car14      | 0.08130798 | 0.08 | 97.5%  |

|          |             |      |        |
|----------|-------------|------|--------|
| Car15    | 0.5084738   | 0.13 | 25.9%  |
| Car2     | 6.362234    | 0.74 | 11.6%  |
| Car3     | 0.3193774   | 0.10 | 31.2%  |
| Car4     | 0.01344318  | 0.02 | 147.2% |
| Car5a    | 0.00274004  | 0.01 | 223.6% |
| Car5b    | 0.2967014   | 0.07 | 22.3%  |
| Car6     | 0.03116976  | 0.01 | 45.0%  |
| Car7     | 1.267744    | 0.25 | 20.0%  |
| Car8     | 2.105834    | 0.21 | 10.1%  |
| Car9     | 0.00792988  | 0.01 | 145.4% |
| Card10   | 0.5389438   | 0.04 | 6.7%   |
| Card11   | 0.002815638 | 0.00 | 138.0% |
| Card14   | 0.014045442 | 0.01 | 61.2%  |
| Card15   | 0.01267914  | 0.01 | 65.4%  |
| Card6    | 0.1558922   | 0.02 | 11.2%  |
| Card9    | 0.08242102  | 0.02 | 27.4%  |
| Carf     | 4.388694    | 0.51 | 11.7%  |
| Carhsp1  | 9.849788    | 0.89 | 9.0%   |
| Carkl    | 0.8985578   | 0.04 | 4.3%   |
| Carm1    | 14.5015     | 0.75 | 5.2%   |
| Cars     | 20.02046    | 1.68 | 8.4%   |
| Cars2    | 5.002384    | 0.06 | 1.1%   |
| Cartpt   | 1.25719     | 0.32 | 25.7%  |
| Casc1    | 0.043660568 | 0.06 | 142.7% |
| Casc3    | 5.966664    | 1.04 | 17.5%  |
| Casc4    | 54.57522    | 1.31 | 2.4%   |
| Casc5    | 0.2075128   | 0.05 | 22.7%  |
| Casd1    | 21.90102    | 0.72 | 3.3%   |
| Cask     | 52.78174    | 3.35 | 6.3%   |
| Caskin1  | 41.54494    | 1.60 | 3.8%   |
| Caskin2  | 0.4878658   | 0.07 | 14.3%  |
| Casp1    | 0.04988442  | 0.02 | 48.9%  |
| Casp12   | 0.4956734   | 0.13 | 25.5%  |
| Casp14   | 0.00361214  | 0.01 | 223.6% |
| Casp2    | 4.763886    | 0.21 | 4.4%   |
| Casp3    | 22.8795     | 3.21 | 14.0%  |
| Casp4    | 0.04047712  | 0.02 | 50.3%  |
| Casp6    | 1.12132     | 0.18 | 16.2%  |
| Casp7    | 4.79302     | 0.83 | 17.3%  |
| Casp8    | 0.2465848   | 0.05 | 19.5%  |
| Casp8ap2 | 2.5725      | 0.14 | 5.6%   |
| Casp9    | 6.442472    | 0.43 | 6.7%   |
| Casq1    | 0.03275416  | 0.03 | 105.7% |
| Casq2    | 0.3876186   | 0.15 | 39.3%  |
| Casr     | 0.003795246 | 0.01 | 147.3% |
| Cast     | 1.2021696   | 0.23 | 19.5%  |
| Casz1    | 0.502263    | 0.08 | 16.3%  |

|          |            |      |        |
|----------|------------|------|--------|
| Cat      | 23.51676   | 1.44 | 6.1%   |
| CAT56    | 0.4533518  | 0.10 | 21.5%  |
| CAT60    | 2.522316   | 0.38 | 15.2%  |
| Catsper1 | 0.00267912 | 0.01 | 223.6% |
| Catsper2 | 1.2289886  | 0.18 | 14.4%  |
| Catsper3 | 0.1649311  | 0.04 | 23.9%  |
| Catsper4 | 0.00357234 | 0.01 | 223.6% |
| Cav1     | 0.7816208  | 0.14 | 18.1%  |
| CaV1.2-a | 0.2022768  | 0.06 | 27.9%  |
| Cav2     | 1.1536046  | 0.15 | 13.2%  |
| Cav3     | 0          | 0.00 |        |
| Cbara1   | 18.95014   | 0.98 | 5.2%   |
| Cbfa2t1h | 0.2994338  | 0.03 | 9.0%   |
| Cbfa2t2  | 9.579586   | 0.30 | 3.1%   |
| Cbfa2t3h | 1.511612   | 0.06 | 4.1%   |
| Cbfb     | 6.464482   | 0.50 | 7.8%   |
| Cbl      | 2.853084   | 0.22 | 7.6%   |
| Cblb     | 3.57657    | 0.15 | 4.1%   |
| Cblc     | 0.03039282 | 0.01 | 45.2%  |
| Cbll1    | 6.536362   | 0.46 | 7.0%   |
| Cbln1    | 36.39742   | 3.50 | 9.6%   |
| Cbln2    | 19.23818   | 0.81 | 4.2%   |
| Cbln3    | 0.766959   | 0.19 | 25.4%  |
| Cbln4    | 17.55406   | 1.80 | 10.3%  |
| cbp146   | 0.227074   | 0.09 | 37.8%  |
| cbp82    | 13.53488   | 0.41 | 3.0%   |
| Cbr1     | 35.04954   | 1.81 | 5.2%   |
| Cbr2     | 0.00509934 | 0.01 | 223.6% |
| Cbr3     | 1.395844   | 0.19 | 13.9%  |
| Cbr4     | 5.420788   | 0.32 | 5.9%   |
| Cbs      | 1.59267    | 0.23 | 14.1%  |
| Cbwd1    | 6.5871     | 0.51 | 7.8%   |
| Cbx1     | 10.012454  | 0.92 | 9.2%   |
| Cbx2     | 0.865209   | 0.20 | 23.2%  |
| Cbx3     | 4.597494   | 0.48 | 10.5%  |
| Cbx4     | 22.26894   | 0.57 | 2.6%   |
| Cbx5     | 37.4231    | 2.22 | 5.9%   |
| Cbx6     | 73.3801    | 9.80 | 13.4%  |
| Cbx7     | 13.2756    | 0.99 | 7.4%   |
| Cbx8     | 4.205886   | 0.35 | 8.2%   |
| Cby1     | 16.91082   | 0.82 | 4.9%   |
| CC1      | 3.96519    | 0.56 | 14.1%  |
| Cc2d1a   | 17.6293    | 0.80 | 4.6%   |
| Cc2d1b   | 4.252668   | 0.20 | 4.6%   |
| Ccar1    | 15.0368    | 0.72 | 4.8%   |
| Ccbe1    | 0.2000746  | 0.03 | 14.6%  |
| Ccbl1    | 4.540332   | 0.31 | 6.9%   |

|          |             |      |        |
|----------|-------------|------|--------|
| Ccbl2    | 1.633162    | 0.11 | 6.8%   |
| Ccbp2    | 0.047528144 | 0.03 | 68.4%  |
| Ccdc100  | 15.30672    | 0.33 | 2.2%   |
| Ccdc101  | 3.355974    | 0.54 | 16.2%  |
| Ccdc102a | 0.6397536   | 0.10 | 15.2%  |
| Ccdc103  | 0.2887008   | 0.05 | 16.6%  |
| Ccdc104  | 37.81118    | 0.92 | 2.4%   |
| Ccdc106  | 13.62758    | 0.77 | 5.7%   |
| Ccdc108  | 0.07220626  | 0.03 | 35.2%  |
| Ccdc109a | 11.25762    | 0.41 | 3.6%   |
| Ccdc109b | 1.375602    | 0.19 | 13.8%  |
| Ccdc11   | 0.0229999   | 0.02 | 94.6%  |
| Ccdc110  | 0.026600222 | 0.02 | 67.3%  |
| Ccdc111  | 0.8165534   | 0.32 | 38.8%  |
| Ccdc112  | 1.590497    | 0.55 | 34.4%  |
| Ccdc113  | 0.04030634  | 0.03 | 71.8%  |
| Ccdc114  | 0.0648809   | 0.03 | 52.7%  |
| Ccdc115  | 3.472028    | 0.12 | 3.4%   |
| Ccdc116  | 3.615586    | 1.17 | 32.4%  |
| Ccdc117  | 4.24546     | 0.31 | 7.4%   |
| Ccdc12   | 2.613062    | 0.29 | 11.1%  |
| Ccdc120  | 2.955328    | 0.26 | 8.7%   |
| Ccdc122  | 0.353849    | 0.10 | 29.5%  |
| Ccdc123  | 1.800962    | 0.21 | 11.8%  |
| Ccdc124  | 25.98726    | 3.14 | 12.1%  |
| Ccdc125  | 0.11339438  | 0.03 | 30.7%  |
| Ccdc126  | 4.941604    | 0.47 | 9.6%   |
| Ccdc127  | 15.15852    | 0.61 | 4.0%   |
| Ccdc128  | 13.93806    | 0.76 | 5.4%   |
| Ccdc129  | 0.025062346 | 0.01 | 40.8%  |
| Ccdc13   | 0.06014394  | 0.04 | 72.8%  |
| Ccdc130  | 3.03706     | 0.40 | 13.1%  |
| Ccdc131  | 9.618224    | 0.78 | 8.1%   |
| Ccdc132  | 17.35556    | 0.85 | 4.9%   |
| Ccdc134  | 2.716136    | 0.19 | 6.8%   |
| Ccdc135  | 0.06572276  | 0.06 | 94.2%  |
| Ccdc136  | 12.5738     | 0.53 | 4.2%   |
| Ccdc137  | 3.644652    | 0.18 | 4.9%   |
| Ccdc138  | 0.13744212  | 0.06 | 45.2%  |
| Ccdc139  | 8.797974    | 1.20 | 13.6%  |
| Ccdc14   | 0.0501172   | 0.02 | 43.2%  |
| Ccdc142  | 2.32864     | 0.57 | 24.6%  |
| Ccdc144b | 0.01879722  | 0.03 | 155.5% |
| Ccdc15   | 0.8409536   | 0.21 | 24.8%  |
| Ccdc16   | 3.35516     | 0.20 | 5.9%   |
| Ccdc18   | 0.2155816   | 0.13 | 60.1%  |
| Ccdc19   | 0.06636154  | 0.01 | 21.0%  |

|         |             |      |        |
|---------|-------------|------|--------|
| Ccdc21  | 1.58517     | 0.13 | 8.4%   |
| Ccdc22  | 5.249712    | 0.50 | 9.5%   |
| Ccdc23  | 9.656282    | 0.60 | 6.2%   |
| Ccdc24  | 0.4728698   | 0.18 | 38.1%  |
| Ccdc25  | 15.79766    | 0.92 | 5.8%   |
| Ccdc27  | 0.0056231   | 0.01 | 223.6% |
| Ccdc28a | 3.43764     | 0.91 | 26.4%  |
| Ccdc28b | 13.83298    | 2.23 | 16.1%  |
| Ccdc3   | 1.0297584   | 0.27 | 26.4%  |
| Ccdc32  | 12.0769     | 0.95 | 7.9%   |
| Ccdc33  | 0.00704864  | 0.01 | 106.4% |
| Ccdc34  | 3.743092    | 0.37 | 10.0%  |
| Ccdc36  | 0.028840738 | 0.02 | 75.6%  |
| Ccdc37  | 0.2341184   | 0.03 | 12.5%  |
| Ccdc38  | 0.5137686   | 0.08 | 15.8%  |
| Ccdc39  | 1.315496    | 0.15 | 11.5%  |
| Ccdc40  | 0.326478    | 0.12 | 35.3%  |
| Ccdc41  | 7.57333     | 0.44 | 5.8%   |
| Ccdc42  | 0           | 0.00 |        |
| Ccdc43  | 5.706554    | 0.57 | 9.9%   |
| Ccdc44  | 7.070136    | 0.24 | 3.4%   |
| Ccdc45  | 3.798676    | 0.92 | 24.3%  |
| Ccdc46  | 0.3249192   | 0.05 | 15.1%  |
| Ccdc47  | 24.13494    | 0.77 | 3.2%   |
| Ccdc49  | 5.169276    | 0.27 | 5.3%   |
| Ccdc5   | 3.11337     | 0.37 | 11.9%  |
| Ccdc50  | 20.61924    | 1.76 | 8.5%   |
| Ccdc51  | 1.742272    | 0.08 | 4.7%   |
| Ccdc52  | 1.820578    | 0.26 | 14.2%  |
| Ccdc53  | 6.341146    | 0.65 | 10.2%  |
| Ccdc54  | 0           | 0.00 |        |
| Ccdc55  | 4.290918    | 0.46 | 10.8%  |
| Ccdc56  | 47.09734    | 2.43 | 5.2%   |
| Ccdc57  | 1.278172    | 0.15 | 12.1%  |
| Ccdc58  | 2.113272    | 0.13 | 6.1%   |
| Ccdc59  | 6.622968    | 0.57 | 8.5%   |
| Ccdc60  | 0.02589832  | 0.01 | 38.8%  |
| Ccdc63  | 0.01499784  | 0.02 | 142.5% |
| Ccdc64  | 10.92262    | 0.45 | 4.1%   |
| Ccdc64b | 0.01091981  | 0.01 | 119.0% |
| Ccdc65  | 3.83013     | 0.31 | 8.0%   |
| Ccdc66  | 2.097022    | 0.25 | 11.9%  |
| Ccdc67  | 0.013794802 | 0.01 | 70.5%  |
| Ccdc68  | 0.04742954  | 0.04 | 88.4%  |
| Ccdc69  | 0.0603295   | 0.03 | 47.8%  |
| Ccdc7   | 0           | 0.00 |        |
| Ccdc70  | 0           | 0.00 |        |

|         |            |      |        |
|---------|------------|------|--------|
| Ccdc71  | 10.83671   | 0.81 | 7.5%   |
| Ccdc72  | 11.56456   | 1.54 | 13.3%  |
| Ccdc73  | 1.84136    | 0.14 | 7.6%   |
| Ccdc76  | 1.835264   | 0.17 | 9.2%   |
| Ccdc77  | 1.345184   | 0.15 | 11.3%  |
| Ccdc79  | 0.11260462 | 0.03 | 30.4%  |
| Ccdc80  | 1.51742    | 0.19 | 12.6%  |
| Ccdc81  | 0.1592601  | 0.05 | 34.2%  |
| Ccdc82  | 0          | 0.00 |        |
| Ccdc83  | 0          | 0.00 |        |
| Ccdc84  | 2.567238   | 0.36 | 13.9%  |
| Ccdc85a | 14.71876   | 0.39 | 2.7%   |
| Ccdc85b | 6.705474   | 0.25 | 3.8%   |
| Ccdc86  | 2.736016   | 0.22 | 8.2%   |
| Ccdc87  | 0.5325064  | 0.13 | 24.8%  |
| Ccdc88a | 12.74428   | 1.39 | 10.9%  |
| Ccdc88b | 0.02713246 | 0.01 | 31.9%  |
| Ccdc88c | 1.631778   | 0.21 | 12.9%  |
| Ccdc9   | 5.131612   | 0.64 | 12.5%  |
| Ccdc90a | 0.8116638  | 0.21 | 26.1%  |
| Ccdc90b | 4.838628   | 0.26 | 5.3%   |
| Ccdc91  | 13.61754   | 0.90 | 6.6%   |
| Ccdc92  | 26.9205    | 2.05 | 7.6%   |
| Ccdc93  | 3.92367    | 0.36 | 9.1%   |
| Ccdc94  | 1.860062   | 0.12 | 6.4%   |
| Ccdc95  | 12.5876    | 0.91 | 7.2%   |
| Ccdc96  | 0.3288716  | 0.12 | 37.1%  |
| Ccdc97  | 12.49528   | 0.42 | 3.3%   |
| Ccdc98  | 1.462434   | 0.29 | 19.8%  |
| Ccdc99  | 0.3829168  | 0.07 | 19.3%  |
| Cchcr1  | 0.5055776  | 0.07 | 14.6%  |
| Ccin    | 0.05022238 | 0.02 | 45.9%  |
| Cck     | 0.2775696  | 0.10 | 34.7%  |
| Cckar   | 0.12405574 | 0.05 | 41.7%  |
| Cckbr   | 2.429696   | 0.40 | 16.4%  |
| Ccl1    | 0          | 0.00 |        |
| Ccl11   | 0.0822279  | 0.10 | 123.5% |
| Ccl12   | 0          | 0.00 |        |
| Ccl17   | 1.0771414  | 0.45 | 41.8%  |
| Ccl19   | 0.01539298 | 0.02 | 140.8% |
| Ccl2    | 0.0602388  | 0.09 | 143.3% |
| Ccl20   | 0.12728164 | 0.17 | 136.7% |
| Ccl21a  | 0          | 0.00 |        |
| Ccl21b  | 0          | 0.00 |        |
| Ccl21c  | 0          | 0.00 |        |
| Ccl22   | 0.00716792 | 0.01 | 137.6% |
| Ccl24   | 0.006918   | 0.02 | 223.6% |

|         |            |      |        |
|---------|------------|------|--------|
| Ccl25   | 4.321308   | 0.34 | 7.9%   |
| Ccl26l  | 0          | 0.00 |        |
| Ccl27   | 4.561266   | 4.27 | 93.6%  |
| Ccl28   | 0          | 0.00 |        |
| Ccl3    | 0          | 0.00 |        |
| Ccl4    | 0          | 0.00 |        |
| Ccl5    | 0          | 0.00 |        |
| Ccl6    | 0          | 0.00 |        |
| Ccl7    | 0.03204518 | 0.03 | 108.3% |
| Ccl8    | 0          | 0.00 |        |
| Ccl9    | 0.00269052 | 0.01 | 223.6% |
| Ccm2    | 12.3806    | 0.66 | 5.4%   |
| Ccn1    | 1.843566   | 0.68 | 37.0%  |
| Ccna1   | 0.12072718 | 0.03 | 26.7%  |
| Ccna2   | 2.511498   | 0.22 | 8.6%   |
| Ccnb1   | 0.516554   | 0.10 | 19.2%  |
| Ccnb2   | 0.8230556  | 0.16 | 18.9%  |
| Ccnb3   | 0          | 0.00 |        |
| Ccnc    | 14.80932   | 1.22 | 8.2%   |
| Ccnd1   | 3.74144    | 0.35 | 9.5%   |
| Ccnd2   | 19.7834    | 1.28 | 6.5%   |
| Ccnd3   | 4.269346   | 0.63 | 14.9%  |
| Ccndbp1 | 25.33312   | 0.86 | 3.4%   |
| Ccne1   | 5.843288   | 0.56 | 9.5%   |
| Ccne2   | 6.815744   | 1.87 | 27.4%  |
| Ccnf    | 0.945896   | 0.17 | 18.5%  |
| Ccng1   | 27.76356   | 2.00 | 7.2%   |
| Ccng2   | 10.51794   | 1.66 | 15.8%  |
| Ccnh    | 23.83198   | 1.43 | 6.0%   |
| Ccni    | 66.8044    | 3.36 | 5.0%   |
| Ccnj    | 3.04891    | 0.16 | 5.2%   |
| Ccnjl   | 0.2580798  | 0.11 | 43.4%  |
| Ccnk    | 7.896178   | 0.49 | 6.2%   |
| Ccnl1   | 6.409514   | 1.05 | 16.3%  |
| Ccnl2   | 19.00186   | 1.51 | 7.9%   |
| Ccno    | 0.3054108  | 0.09 | 28.4%  |
| Ccnt1   | 7.421892   | 0.78 | 10.5%  |
| Ccnt2   | 12.13536   | 0.80 | 6.6%   |
| Ccny    | 22.90928   | 0.85 | 3.7%   |
| Ccnyl1  | 1.459764   | 0.24 | 16.4%  |
| Ccpg1   | 17.96834   | 1.51 | 8.4%   |
| Ccr1    | 0          | 0.00 |        |
| Ccr10   | 0.3548086  | 0.09 | 26.2%  |
| Ccr1l1  | 0          | 0.00 |        |
| Ccr2    | 0          | 0.00 |        |
| Ccr3    | 0.00363876 | 0.01 | 223.6% |
| Ccr4    | 0          | 0.00 |        |

|         |             |      |        |
|---------|-------------|------|--------|
| Ccr5    | 0           | 0.00 |        |
| Ccr6    | 0           | 0.00 |        |
| Ccr7    | 0.02356304  | 0.01 | 44.7%  |
| Ccr8    | 0           | 0.00 |        |
| Ccr9    | 0.0061912   | 0.01 | 136.9% |
| Ccrk    | 5.34717     | 0.26 | 4.8%   |
| Ccr11   | 5.070032    | 1.18 | 23.3%  |
| Ccr12   | 0.01530454  | 0.02 | 102.0% |
| Ccrn4l  | 13.99892    | 1.55 | 11.1%  |
| Ccs     | 10.89202    | 1.09 | 10.0%  |
| Cct2    | 85.52106    | 4.49 | 5.3%   |
| Cct3    | 49.2472     | 3.73 | 7.6%   |
| Cct4    | 63.00412    | 4.84 | 7.7%   |
| Cct5    | 111.6672    | 5.95 | 5.3%   |
| Cct6a   | 106.2918    | 4.75 | 4.5%   |
| Cct6b   | 0.06884868  | 0.01 | 19.7%  |
| Cct7    | 80.09318    | 4.33 | 5.4%   |
| Cct8    | 93.91558    | 3.89 | 4.1%   |
| Cd109   | 0.1780066   | 0.03 | 14.9%  |
| Cd14    | 0.17117488  | 0.06 | 36.7%  |
| Cd151   | 8.790732    | 0.66 | 7.6%   |
| Cd160   | 0.01350116  | 0.01 | 93.7%  |
| Cd163   | 0.001855642 | 0.00 | 223.6% |
| Cd163l1 | 0           | 0.00 |        |
| Cd164   | 24.15332    | 2.67 | 11.0%  |
| Cd164l2 | 1.806828    | 0.21 | 11.5%  |
| Cd177   | 0.01122072  | 0.01 | 113.9% |
| Cd180   | 0.0053322   | 0.01 | 137.6% |
| Cd19    | 0.0021787   | 0.00 | 223.6% |
| Cd1d1   | 3.444622    | 0.43 | 12.6%  |
| Cd1d2   | 0.32336     | 0.06 | 18.5%  |
| Cd2     | 0           | 0.00 |        |
| Cd200   | 66.0854     | 3.77 | 5.7%   |
| Cd200r1 | 0.00281514  | 0.01 | 223.6% |
| Cd200r2 | 0.188926    | 0.06 | 33.4%  |
| Cd200r3 | 0.00281106  | 0.01 | 223.6% |
| Cd200r4 | 0           | 0.00 |        |
| Cd207   | 0.01787964  | 0.02 | 110.4% |
| Cd209a  | 0           | 0.00 |        |
| Cd209b  | 0           | 0.00 |        |
| Cd209c  | 0           | 0.00 |        |
| Cd209d  | 0           | 0.00 |        |
| Cd209e  | 0           | 0.00 |        |
| Cd209f  | 0           | 0.00 |        |
| Cd209g  | 0           | 0.00 |        |
| Cd22    | 0           | 0.00 |        |
| Cd226   | 0.01913082  | 0.01 | 74.1%  |



|                  |             |      |        |
|------------------|-------------|------|--------|
| Cd244            | 0.006613966 | 0.01 | 77.6%  |
| Cd247            | 0.9965038   | 0.49 | 49.1%  |
| Cd248            | 0.629966    | 0.20 | 32.2%  |
| Cd24a            | 62.45246    | 6.95 | 11.1%  |
| Cd27             | 0.01388586  | 0.02 | 137.5% |
| Cd274            | 0.5108194   | 0.08 | 16.0%  |
| Cd276            | 3.292508    | 0.34 | 10.4%  |
| Cd28             | 0.008963926 | 0.01 | 102.5% |
| Cd2ap            | 4.64426     | 0.19 | 4.0%   |
| Cd2bp2           | 13.4584     | 0.61 | 4.5%   |
| CD3_[zeta]/[eta] | 0.08809564  | 0.07 | 75.8%  |
| Cd300a           | 0.00150255  | 0.00 | 223.6% |
| Cd300c           | 0           | 0.00 |        |
| Cd300d           | 0           | 0.00 |        |
| Cd300e           | 0.0038974   | 0.01 | 223.6% |
| Cd300lb          | 0           | 0.00 |        |
| Cd300lf          | 0           | 0.00 |        |
| Cd300lg          | 0.00449546  | 0.01 | 223.6% |
| Cd302            | 2.547152    | 0.29 | 11.4%  |
| Cd320            | 2.665148    | 0.36 | 13.5%  |
| Cd33             | 0           | 0.00 |        |
| Cd34             | 0.6481808   | 0.18 | 28.1%  |
| Cd36             | 0.03043334  | 0.03 | 106.8% |
| Cd37             | 0.00976832  | 0.01 | 95.4%  |
| Cd38             | 0.2192928   | 0.03 | 13.7%  |
| Cd3d             | 0.00933162  | 0.02 | 223.6% |
| Cd3e             | 0           | 0.00 |        |
| Cd3eap           | 4.98379     | 0.32 | 6.4%   |
| Cd3g             | 0           | 0.00 |        |
| Cd4              | 0.012904506 | 0.02 | 127.7% |
| Cd40             | 0.2380124   | 0.01 | 5.2%   |
| Cd40lg           | 0           | 0.00 |        |
| Cd44             | 1.508366    | 0.26 | 17.3%  |
| Cd46             | 0.1983947   | 0.12 | 59.9%  |
| Cd47             | 52.97534    | 3.44 | 6.5%   |
| Cd48             | 0           | 0.00 |        |
| Cd5              | 0.00448894  | 0.01 | 137.3% |
| Cd52             | 0.01145228  | 0.03 | 223.6% |
| Cd53             | 0.04129314  | 0.05 | 130.4% |
| Cd55             | 2.29441     | 0.28 | 12.0%  |
| Cd59a            | 0.8406972   | 0.11 | 12.8%  |
| Cd59b            | 0.0667289   | 0.06 | 85.5%  |
| Cd5l             | 0.00265788  | 0.01 | 223.6% |
| Cd6              | 0           | 0.00 |        |
| Cd63             | 6.794134    | 0.53 | 7.8%   |
| Cd68             | 1.1289684   | 0.22 | 19.8%  |
| Cd69             | 0           | 0.00 |        |

|          |             |      |        |
|----------|-------------|------|--------|
| Cd7      | 0.01999798  | 0.02 | 92.4%  |
| Cd70     | 0.0053212   | 0.01 | 223.6% |
| Cd72     | 2.500411894 | 2.74 | 109.5% |
| Cd74     | 0.4622786   | 0.10 | 21.4%  |
| Cd79a    | 0.0179429   | 0.01 | 59.1%  |
| Cd79b    | 0.00358796  | 0.01 | 223.6% |
| Cd80     | 0.15971566  | 0.09 | 57.2%  |
| Cd81     | 170.64      | 9.98 | 5.8%   |
| Cd82     | 0.4492008   | 0.10 | 22.4%  |
| Cd83     | 11.036438   | 1.73 | 15.7%  |
| CD83     | 1.1287624   | 0.12 | 10.4%  |
| Cd84     | 0.00473208  | 0.01 | 223.6% |
| Cd86     | 0           | 0.00 |        |
| Cd8a     | 0           | 0.00 |        |
| Cd8b1    | 0           | 0.00 |        |
| Cd9      | 3.088808    | 0.52 | 16.8%  |
| Cd93     | 0.015641896 | 0.01 | 57.4%  |
| Cd94     | 0           | 0.00 |        |
| Cd96     | 0.00574766  | 0.01 | 223.6% |
| Cd97     | 0.7178168   | 0.21 | 28.7%  |
| Cd99I2   | 45.64644    | 0.88 | 1.9%   |
| Cda      | 0.15511144  | 0.09 | 57.7%  |
| Cdadcl   | 13.36846    | 0.64 | 4.8%   |
| Cdan1    | 3.011528    | 0.18 | 6.0%   |
| Cdc123   | 27.3865     | 1.53 | 5.6%   |
| Cdc14a   | 0.522206    | 0.08 | 15.0%  |
| Cdc14b   | 1.635652    | 0.40 | 24.2%  |
| Cdc16    | 23.54312    | 1.27 | 5.4%   |
| Cdc20    | 0.759847    | 0.25 | 33.0%  |
| Cdc23    | 14.09372    | 0.48 | 3.4%   |
| Cdc25a   | 3.32225     | 0.11 | 3.3%   |
| Cdc25b   | 2.163758    | 0.24 | 11.0%  |
| Cdc25c   | 0.2796024   | 0.08 | 28.7%  |
| Cdc26    | 6.737764    | 1.31 | 19.4%  |
| Cdc27    | 17.8317     | 0.55 | 3.1%   |
| Cdc2a    | 1.1308984   | 0.31 | 27.3%  |
| Cdc2I1   | 14.9884     | 0.43 | 2.8%   |
| Cdc2I5   | 8.22884     | 0.22 | 2.6%   |
| Cdc2I6   | 1.34306     | 0.18 | 13.1%  |
| Cdc34    | 8.425234    | 0.83 | 9.8%   |
| Cdc37    | 37.78104    | 1.41 | 3.7%   |
| Cdc37I1  | 39.96838    | 2.67 | 6.7%   |
| Cdc40    | 5.261052    | 0.35 | 6.7%   |
| Cdc42    | 152.7202    | 8.27 | 5.4%   |
| Cdc42bpa | 21.17406    | 1.29 | 6.1%   |
| Cdc42bpb | 18.86418    | 0.59 | 3.1%   |
| Cdc42bpg | 1.24248     | 0.06 | 4.7%   |

|          |             |      |        |
|----------|-------------|------|--------|
| Cdc42ep1 | 1.462202    | 0.22 | 14.9%  |
| Cdc42ep2 | 13.68394    | 1.35 | 9.9%   |
| Cdc42ep3 | 4.053826    | 0.33 | 8.2%   |
| Cdc42ep4 | 5.30572     | 0.45 | 8.4%   |
| Cdc42ep5 | 0.7498402   | 0.36 | 47.9%  |
| Cdc42se1 | 10.216856   | 0.43 | 4.2%   |
| Cdc42se2 | 50.09008    | 5.14 | 10.3%  |
| Cdc45l   | 0.8368972   | 0.07 | 8.3%   |
| Cdc5l    | 6.704454    | 0.40 | 5.9%   |
| Cdc6     | 0.15714826  | 0.05 | 32.4%  |
| cdc6     | 0.04197468  | 0.04 | 95.2%  |
| Cdc7     | 4.77205     | 0.59 | 12.3%  |
| Cdc73    | 4.154692    | 0.37 | 8.8%   |
| Cdca2    | 0.424442    | 0.07 | 16.8%  |
| Cdca3    | 1.403448    | 0.36 | 25.4%  |
| Cdca4    | 2.299556    | 0.33 | 14.2%  |
| Cdca5    | 0.5275136   | 0.10 | 19.0%  |
| Cdca7    | 0.574185    | 0.09 | 15.5%  |
| Cdca7l   | 0.3588648   | 0.13 | 36.6%  |
| Cdca8    | 1.0978404   | 0.16 | 14.2%  |
| Cdcp1    | 0.06701666  | 0.02 | 35.1%  |
| Cdcp2    | 0.00422712  | 0.01 | 137.8% |
| Cdgap    | 1.19874     | 0.15 | 12.5%  |
| Cdh1     | 0.344669    | 0.03 | 8.7%   |
| Cdh10    | 17.77826    | 0.68 | 3.8%   |
| Cdh11    | 18.00414    | 1.38 | 7.6%   |
| Cdh12    | 1.845484    | 0.19 | 10.4%  |
| Cdh13    | 75.55284    | 2.25 | 3.0%   |
| Cdh15    | 0.0029839   | 0.01 | 223.6% |
| Cdh16    | 0           | 0.00 |        |
| Cdh17    | 0.010030982 | 0.02 | 173.9% |
| Cdh18    | 22.79866    | 0.60 | 2.6%   |
| Cdh19    | 0.04621976  | 0.02 | 37.5%  |
| Cdh2     | 24.54784    | 0.47 | 1.9%   |
| Cdh20    | 1.792204    | 0.11 | 6.2%   |
| Cdh22    | 5.440262    | 0.97 | 17.8%  |
| Cdh23    | 0.09603998  | 0.03 | 29.4%  |
| Cdh24    | 11.86374    | 1.51 | 12.7%  |
| Cdh26    | 0.03554232  | 0.02 | 58.2%  |
| Cdh3     | 0.035998006 | 0.03 | 71.9%  |
| Cdh4     | 7.104596    | 0.46 | 6.5%   |
| Cdh5     | 0.8602956   | 0.23 | 27.3%  |
| Cdh6     | 6.58416     | 0.37 | 5.7%   |
| Cdh7     | 7.003076    | 0.20 | 2.9%   |
| Cdh8     | 11.7094     | 1.00 | 8.5%   |
| Cdipt    | 54.68102    | 1.86 | 3.4%   |
| Cdk10    | 9.356328    | 0.69 | 7.4%   |

|            |            |      |        |
|------------|------------|------|--------|
| Cdk2       | 1.355682   | 0.30 | 22.4%  |
| Cdk2ap2    | 11.62362   | 0.51 | 4.4%   |
| Cdk3       | 0.4224378  | 0.15 | 34.4%  |
| Cdk4       | 22.00158   | 1.73 | 7.8%   |
| Cdk5       | 44.81148   | 1.27 | 2.8%   |
| Cdk5r1     | 37.16284   | 1.78 | 4.8%   |
| Cdk5r2     | 71.18472   | 8.67 | 12.2%  |
| Cdk5rap1   | 3.595342   | 0.22 | 6.0%   |
| Cdk5rap2   | 1.414828   | 0.13 | 9.0%   |
| Cdk5rap3   | 10.87102   | 0.77 | 7.1%   |
| Cdk6       | 0.1769154  | 0.07 | 38.5%  |
| Cdk7       | 7.602736   | 0.61 | 8.1%   |
| Cdk8       | 7.48564    | 0.27 | 3.6%   |
| Cdk9       | 15.13948   | 0.66 | 4.4%   |
| Cdkal1     | 3.74448    | 0.18 | 4.8%   |
| Cdkl1      | 0.7407778  | 0.15 | 20.7%  |
| Cdkl2      | 22.74612   | 0.67 | 3.0%   |
| Cdkl3      | 7.961198   | 0.53 | 6.6%   |
| Cdkl4      | 0.5370826  | 0.10 | 18.0%  |
| Cdkl5      | 5.212904   | 0.42 | 8.0%   |
| Cdkn1a     | 22.69896   | 3.96 | 17.5%  |
| Cdkn1b     | 13.90044   | 0.31 | 2.2%   |
| Cdkn1c     | 9.584512   | 2.57 | 26.8%  |
| Cdkn2a     | 5.225492   | 0.81 | 15.6%  |
| Cdkn2aip   | 4.063534   | 0.16 | 3.9%   |
| Cdkn2aipnl | 19.62964   | 1.51 | 7.7%   |
| Cdkn2b     | 2.394226   | 0.22 | 9.0%   |
| Cdkn2c     | 1.0542838  | 0.27 | 25.9%  |
| Cdkn2d     | 0.02063572 | 0.01 | 59.1%  |
| Cdkn3      | 0.5059208  | 0.15 | 29.2%  |
| Cdo1       | 12.42346   | 1.61 | 13.0%  |
| Cdon       | 1.686698   | 0.16 | 9.3%   |
| Cdr2       | 6.69411    | 0.54 | 8.0%   |
| Cdr2l      | 9.898644   | 0.56 | 5.7%   |
| Cdrt4      | 0.07990346 | 0.04 | 51.7%  |
| Cds1       | 15.74884   | 0.97 | 6.1%   |
| Cds2       | 69.86156   | 4.02 | 5.8%   |
| Cdsn       | 0.06801544 | 0.02 | 32.7%  |
| Cdt1       | 2.297088   | 0.30 | 13.2%  |
| Cdv1R      | 3.488658   | 0.92 | 26.3%  |
| Cdv3       | 17.94236   | 1.35 | 7.5%   |
| Cdx1       | 0.0033657  | 0.01 | 223.6% |
| Cdx2       | 0.00348992 | 0.01 | 223.6% |
| Cdx4       | 0.05179206 | 0.02 | 29.5%  |
| Cdyl       | 1.628376   | 0.16 | 9.9%   |
| Cdyl2      | 1.872922   | 0.18 | 9.4%   |
| Ceacam1    | 0.00821218 | 0.01 | 102.3% |

|          |            |      |        |
|----------|------------|------|--------|
| Ceacam10 | 0.00700198 | 0.02 | 223.6% |
| Ceacam11 | 0          | 0.00 |        |
| Ceacam12 | 0          | 0.00 |        |
| Ceacam13 | 0.0062946  | 0.01 | 223.6% |
| Ceacam14 | 0          | 0.00 |        |
| Ceacam15 | 0.00570982 | 0.01 | 223.6% |
| Ceacam16 | 0.2306074  | 0.06 | 27.2%  |
| Ceacam18 | 0.00586398 | 0.01 | 223.6% |
| Ceacam19 | 0          | 0.00 |        |
| Ceacam2  | 0.00256724 | 0.01 | 223.6% |
| Ceacam20 | 0.3937254  | 0.10 | 24.5%  |
| Ceacam9  | 0.03047452 | 0.01 | 44.9%  |
| Cebpa    | 0.898689   | 0.11 | 12.7%  |
| Cebpb    | 1.773516   | 0.25 | 14.3%  |
| Cebpd    | 1.14446    | 0.31 | 26.8%  |
| Cebpe    | 0.01191298 | 0.02 | 141.9% |
| Cebpg    | 7.489744   | 0.26 | 3.5%   |
| Cebpz    | 6.060364   | 0.50 | 8.2%   |
| Cecr2    | 0.255053   | 0.06 | 24.2%  |
| Cecr5    | 3.22918    | 0.28 | 8.6%   |
| Cecr6    | 2.372342   | 0.13 | 5.4%   |
| Ceecam1  | 3.178182   | 0.28 | 8.9%   |
| Cel      | 0.00244292 | 0.01 | 223.6% |
| Celf3    | 1.846326   | 0.54 | 29.1%  |
| Celsr1   | 0.2028722  | 0.02 | 11.1%  |
| Celsr2   | 15.39932   | 0.42 | 2.7%   |
| Celsr3   | 10.016466  | 0.31 | 3.1%   |
| Cend1    | 152.261    | 7.36 | 4.8%   |
| Cenpa    | 0.369398   | 0.11 | 29.6%  |
| Cenp-a   | 0.5864814  | 0.20 | 34.4%  |
| Cenpb    | 18.20808   | 0.79 | 4.3%   |
| Cenpc1   | 7.424266   | 1.02 | 13.8%  |
| Cenpe    | 0.4150622  | 0.03 | 7.6%   |
| Cenpf    | 0.4438786  | 0.13 | 28.7%  |
| Cenph    | 0.864267   | 0.20 | 23.3%  |
| Cenpi    | 0.8101572  | 0.13 | 16.7%  |
| Cenpj    | 0.7115416  | 0.06 | 8.0%   |
| Cenpk    | 0.4032356  | 0.18 | 44.9%  |
| Cenpl    | 0.9607034  | 0.07 | 6.8%   |
| Cenpm    | 1.1331508  | 0.15 | 13.7%  |
| Cenpn    | 1.118474   | 0.20 | 17.7%  |
| Cenpo    | 3.39793    | 0.29 | 8.4%   |
| Cenpp    | 0.67135    | 0.17 | 25.1%  |
| Cenpq    | 2.380286   | 0.35 | 14.8%  |
| Cenpt    | 6.312588   | 1.12 | 17.7%  |
| Centa1   | 62.50966   | 3.77 | 6.0%   |
| Centa2   | 0.05404038 | 0.02 | 28.3%  |

|        |             |      |        |
|--------|-------------|------|--------|
| Centb1 | 0.00502874  | 0.01 | 138.8% |
| Centb2 | 7.166128    | 0.48 | 6.8%   |
| Centb5 | 18.35924    | 1.16 | 6.3%   |
| Centd1 | 0.454192    | 0.21 | 45.8%  |
| Centd2 | 4.074966    | 0.95 | 23.2%  |
| Centd3 | 0.03308294  | 0.01 | 23.0%  |
| Centg1 | 29.76658    | 1.94 | 6.5%   |
| Centg2 | 29.85246    | 1.20 | 4.0%   |
| Centg3 | 80.83812    | 4.51 | 5.6%   |
| Cep110 | 1.39701     | 0.52 | 37.6%  |
| Cep135 | 1.253216    | 0.19 | 14.9%  |
| Cep152 | 0.2282068   | 0.03 | 11.2%  |
| Cep164 | 3.000978    | 0.31 | 10.3%  |
| Cep170 | 26.06862    | 1.51 | 5.8%   |
| Cep192 | 1.434318    | 0.24 | 16.5%  |
| Cep2   | 0.855692    | 0.40 | 46.4%  |
| Cep250 | 2.814516    | 0.33 | 11.7%  |
| Cep27  | 6.250302    | 0.56 | 9.0%   |
| Cep290 | 0.2143466   | 0.13 | 60.3%  |
| Cep350 | 2.33841     | 0.19 | 7.9%   |
| Cep55  | 0.4095106   | 0.07 | 16.3%  |
| Cep57  | 5.030194    | 0.34 | 6.9%   |
| Cep63  | 4.428996    | 0.19 | 4.4%   |
| Cep68  | 8.837642    | 1.01 | 11.5%  |
| Cep70  | 6.22422     | 0.50 | 8.0%   |
| Cep72  | 0.7329038   | 0.17 | 23.1%  |
| Cep76  | 1.429124    | 0.10 | 6.9%   |
| Cep78  | 4.231094    | 0.19 | 4.4%   |
| Cept1  | 15.09614    | 0.79 | 5.3%   |
| Cer1   | 0           | 0.00 |        |
| Cerk   | 32.40574    | 1.00 | 3.1%   |
| Cerkl  | 0.028523924 | 0.03 | 107.2% |
| Ces1   | 0.00483636  | 0.01 | 223.6% |
| Ces2   | 0           | 0.00 |        |
| Ces3   | 0.02805584  | 0.01 | 39.1%  |
| Ces5   | 0.02838284  | 0.03 | 98.1%  |
| Ces6   | 0           | 0.00 |        |
| Ces7   | 0.04473654  | 0.03 | 72.2%  |
| Cetn1  | 0.00456584  | 0.01 | 223.6% |
| Cetn2  | 10.720736   | 0.69 | 6.4%   |
| Cetn3  | 25.03352    | 1.64 | 6.6%   |
| Cetn4  | 0.7651896   | 0.20 | 26.2%  |
| Cfb    | 0.14886896  | 0.04 | 29.6%  |
| Cfc1   | 0.00671654  | 0.02 | 223.6% |
| Cfd    | 0           | 0.00 |        |
| Cfdp1  | 46.9331     | 1.55 | 3.3%   |
| Cfh    | 0.3645456   | 0.08 | 21.0%  |

|                |             |       |        |
|----------------|-------------|-------|--------|
| Cfhr1          | 0           | 0.00  |        |
| Cfhrb_4/2      | 0           | 0.00  |        |
| Cfi            | 0.0098542   | 0.01  | 142.3% |
| Cfl1           | 227.7232    | 16.81 | 7.4%   |
| Cfl2           | 75.59394    | 4.88  | 6.5%   |
| Cflar          | 1.617092    | 0.19  | 12.0%  |
| Cfp            | 1.803762    | 0.42  | 23.1%  |
| Cftr           | 0.2021452   | 0.03  | 16.1%  |
| CFTR           | 0.07966938  | 0.07  | 89.0%  |
| Cga            | 0.026697    | 0.06  | 223.6% |
| Cggbp1         | 25.70124    | 1.17  | 4.5%   |
| Cgn            | 4.392212    | 0.11  | 2.5%   |
| Cgn1           | 2.887852    | 0.36  | 12.5%  |
| Cgref1         | 14.23446    | 0.82  | 5.8%   |
| Cgrrf1         | 6.917126    | 0.55  | 8.0%   |
| Ch25h          | 0.2722148   | 0.06  | 22.9%  |
| CHAC           | 2.147266    | 0.25  | 11.6%  |
| Chac1          | 14.73296    | 1.83  | 12.4%  |
| Chac2          | 4.529574    | 1.24  | 27.3%  |
| Chad           | 0.01474228  | 0.02  | 138.0% |
| Chaf1a         | 1.698376    | 0.08  | 5.0%   |
| Chaf1b         | 1.411974    | 0.15  | 10.8%  |
| ChaK           | 0.3052362   | 0.10  | 33.4%  |
| chat           | 2.5321      | 0.41  | 16.1%  |
| Chat           | 0.07472374  | 0.08  | 110.1% |
| Chchd1         | 20.81338    | 1.89  | 9.1%   |
| Chchd2         | 36.61874    | 1.34  | 3.7%   |
| Chchd3         | 24.85364    | 0.97  | 3.9%   |
| Chchd4         | 17.66446    | 1.34  | 7.6%   |
| Chchd5         | 5.099466    | 0.51  | 10.1%  |
| Chchd6         | 33.50736    | 2.25  | 6.7%   |
| Chchd7         | 11.21794    | 1.01  | 9.0%   |
| Chchd8         | 3.937716    | 0.62  | 15.8%  |
| Chd1           | 2.826914    | 0.20  | 6.9%   |
| Chd1l          | 0.9358482   | 0.09  | 9.2%   |
| Chd2           | 6.497872    | 0.55  | 8.5%   |
| Chd3           | 63.15762    | 1.38  | 2.2%   |
| Chd4           | 14.54968    | 1.21  | 8.3%   |
| Chd5           | 21.29618    | 0.61  | 2.9%   |
| Chd6           | 11.9155     | 0.46  | 3.9%   |
| Chd7           | 1.549746    | 0.10  | 6.3%   |
| Chd8           | 15.67326    | 0.57  | 3.6%   |
| Chd9           | 5.063534    | 0.54  | 10.6%  |
| Chdh           | 0.020705254 | 0.02  | 74.0%  |
| Chek1          | 0.7328234   | 0.08  | 11.4%  |
| Chek2          | 0.7637924   | 0.12  | 16.2%  |
| chemokine_LARC | 0.04277508  | 0.03  | 73.6%  |

|         |             |      |        |
|---------|-------------|------|--------|
| Cherp   | 12.06252    | 1.48 | 12.3%  |
| Ches1   | 0.12381574  | 0.07 | 56.8%  |
| Chfr    | 10.72906    | 0.59 | 5.5%   |
| Chga    | 118.116     | 5.74 | 4.9%   |
| Chgb    | 79.72786    | 1.23 | 1.5%   |
| Chi3l1  | 0.282842    | 0.08 | 27.1%  |
| Chi3l3  | 0.03275856  | 0.02 | 68.4%  |
| Chi3l4  | 0           | 0.00 |        |
| Chia    | 0.01549034  | 0.02 | 159.0% |
| Chic1   | 5.604378    | 0.85 | 15.2%  |
| Chic2   | 5.908046    | 0.23 | 3.9%   |
| Chid1   | 11.24074    | 1.32 | 11.8%  |
| Chit1   | 0.12470624  | 0.05 | 38.8%  |
| Chk2    | 0.1614094   | 0.02 | 14.0%  |
| Chka    | 23.29506    | 2.75 | 11.8%  |
| Chkb    | 12.44238    | 0.36 | 2.9%   |
| Chl1    | 59.81726    | 3.80 | 6.4%   |
| Chm     | 11.90622    | 0.42 | 3.5%   |
| Chml    | 6.242602    | 0.58 | 9.3%   |
| Chmp1a  | 29.1372     | 0.90 | 3.1%   |
| Chmp1b  | 4.891616    | 0.33 | 6.7%   |
| Chmp2a  | 21.57082    | 1.46 | 6.8%   |
| Chmp2b  | 44.04904    | 1.65 | 3.7%   |
| Chmp4b  | 59.4758     | 3.10 | 5.2%   |
| Chmp4c  | 0.03249224  | 0.02 | 50.8%  |
| Chmp5   | 38.40422    | 1.84 | 4.8%   |
| Chmp6   | 11.60542    | 1.28 | 11.1%  |
| Chmp7   | 25.69862    | 0.69 | 2.7%   |
| Chn1    | 32.48596    | 2.19 | 6.7%   |
| Chn2    | 3.74497     | 0.12 | 3.3%   |
| Chodl   | 2.796456    | 0.43 | 15.4%  |
| Chordc1 | 25.40038    | 1.22 | 4.8%   |
| Chpt1   | 12.5161     | 1.47 | 11.7%  |
| Chrac1  | 6.960602    | 0.95 | 13.6%  |
| Chrd    | 1.1297382   | 0.57 | 50.2%  |
| Chrdl1  | 0.7514518   | 0.12 | 15.8%  |
| Chrdl2  | 0.04723996  | 0.01 | 30.2%  |
| Chrm1   | 0.0064537   | 0.01 | 118.3% |
| Chrm2   | 18.50262    | 1.15 | 6.2%   |
| Chrm3   | 8.73957     | 0.39 | 4.5%   |
| Chrm4   | 2.234862    | 0.40 | 17.8%  |
| Chrm5   | 0.06815074  | 0.03 | 39.0%  |
| Chrna1  | 0.0070755   | 0.01 | 103.1% |
| Chrna10 | 0.000107139 | 0.00 | 223.6% |
| Chrna2  | 0.02744146  | 0.01 | 20.9%  |
| Chrna3  | 0.275886    | 0.14 | 51.8%  |
| Chrna4  | 20.67094    | 1.41 | 6.8%   |



|        |             |       |        |
|--------|-------------|-------|--------|
| Chrna5 | 0.3836258   | 0.14  | 36.5%  |
| Chrna6 | 0.01037758  | 0.01  | 59.4%  |
| Chrna7 | 8.656464    | 0.76  | 8.8%   |
| Chrna9 | 0           | 0.00  |        |
| Chrn1  | 0.4118318   | 0.12  | 28.8%  |
| Chrn2  | 20.07258    | 0.54  | 2.7%   |
| Chrn3  | 0.005663962 | 0.01  | 92.9%  |
| Chrn4  | 0.161446    | 0.09  | 54.1%  |
| Chrnd  | 0           | 0.00  |        |
| Chrne  | 0           | 0.00  |        |
| Chrng  | 0           | 0.00  |        |
| Chrp   | 13.00974    | 0.49  | 3.8%   |
| Chst1  | 11.9196     | 0.79  | 6.6%   |
| Chst10 | 14.3983     | 0.70  | 4.9%   |
| Chst11 | 7.65821     | 0.63  | 8.3%   |
| Chst12 | 8.02446     | 0.69  | 8.6%   |
| Chst2  | 23.88628    | 1.11  | 4.6%   |
| Chst3  | 0.06665986  | 0.02  | 24.1%  |
| Chst4  | 0.03991026  | 0.04  | 111.3% |
| Chst5  | 0.02314432  | 0.02  | 106.5% |
| Chst7  | 0.8792562   | 0.14  | 16.0%  |
| Chst8  | 1.72503     | 0.36  | 20.6%  |
| Chst9  | 0.7752564   | 0.13  | 16.8%  |
| Chsy1  | 2.909172    | 0.09  | 3.1%   |
| Chtf18 | 0.3295832   | 0.01  | 2.2%   |
| Chuk   | 8.358946    | 0.31  | 3.7%   |
| Churc1 | 23.22642    | 3.31  | 14.3%  |
| Ci1    | 0.09346976  | 0.09  | 94.7%  |
| Ciao1  | 13.10442    | 0.35  | 2.7%   |
| Ciapi1 | 23.02316    | 2.04  | 8.9%   |
| Cib1   | 3.674544    | 0.22  | 6.0%   |
| Cib2   | 12.58816    | 0.34  | 2.7%   |
| Cib3   | 0           | 0.00  |        |
| Cic    | 29.44922    | 1.33  | 4.5%   |
| Cidea  | 0.3377974   | 0.11  | 33.7%  |
| Cideb  | 0.3270414   | 0.13  | 41.1%  |
| Cidec  | 0           | 0.00  |        |
| Ciita  | 0.01595106  | 0.01  | 59.6%  |
| Cilp   | 1.0066924   | 0.15  | 14.9%  |
| Cilp2  | 0.4038354   | 0.04  | 8.7%   |
| cip7   | 1.982308    | 0.62  | 31.0%  |
| Cip85  | 2.111652    | 0.56  | 26.4%  |
| Cirbp  | 67.60346    | 10.27 | 15.2%  |
| Cirh1a | 7.72575     | 0.69  | 8.9%   |
| Cis4   | 0.1055549   | 0.05  | 50.2%  |
| Cisd1  | 64.98554    | 3.15  | 4.9%   |
| Cisd2  | 9.43567     | 0.35  | 3.7%   |

|          |             |       |        |
|----------|-------------|-------|--------|
| Cish     | 1.33919     | 0.17  | 12.5%  |
| Cit      | 3.510408    | 0.59  | 16.9%  |
| Cited1   | 6.681028    | 1.46  | 21.9%  |
| Cited2   | 22.41512    | 0.91  | 4.0%   |
| Cited4   | 0.3825054   | 0.12  | 32.6%  |
| Ciz1     | 8.289928    | 0.60  | 7.2%   |
| Ckap2    | 2.328148    | 0.46  | 19.8%  |
| Ckap2l   | 0.7707998   | 0.15  | 19.9%  |
| Ckap4    | 19.68894    | 1.65  | 8.4%   |
| Ckap5    | 26.96104    | 1.57  | 5.8%   |
| Ckb      | 147.6438    | 12.55 | 8.5%   |
| Cklf     | 1.34053     | 0.18  | 13.7%  |
| CKLF6    | 0.2373278   | 0.10  | 44.2%  |
| Cklfsf2a | 0.00703632  | 0.01  | 141.9% |
| Ckm      | 0.02913538  | 0.02  | 71.1%  |
| Ckmt1    | 123.5294    | 5.13  | 4.1%   |
| Ckmt2    | 0           | 0.00  |        |
| Cks1b    | 2.286306    | 0.58  | 25.3%  |
| Cks2     | 0.4172642   | 0.17  | 40.6%  |
| Ckt2     | 0.01012076  | 0.01  | 137.3% |
| Clasp1   | 30.88804    | 1.38  | 4.5%   |
| Clasp2   | 94.54906    | 1.53  | 1.6%   |
| ClaspL   | 11.58466    | 0.56  | 4.8%   |
| Clast2   | 0.5329986   | 0.31  | 58.1%  |
| Clast4   | 0.1397694   | 0.03  | 22.4%  |
| Clca1    | 0.03612208  | 0.01  | 37.7%  |
| Clca2    | 0.0089061   | 0.01  | 102.2% |
| Clca3    | 0.013342424 | 0.01  | 107.4% |
| Clca4    | 0.00723628  | 0.01  | 93.3%  |
| Clca5    | 0.00544966  | 0.01  | 138.1% |
| Clca6    | 0.00555476  | 0.01  | 223.6% |
| Clcc1    | 5.491268    | 0.49  | 8.9%   |
| Clcf1    | 1.6717036   | 0.67  | 40.1%  |
| Clcn1    | 0.1915332   | 0.04  | 22.1%  |
| Clcn2    | 7.257858    | 0.18  | 2.5%   |
| Clcn3    | 52.63078    | 3.10  | 5.9%   |
| CLCN3    | 0.638683    | 0.17  | 26.4%  |
| Clcn4-2  | 48.52664    | 1.22  | 2.5%   |
| Clcn5    | 17.83006    | 1.24  | 6.9%   |
| Clcn6    | 31.50824    | 1.43  | 4.5%   |
| Clcn7    | 14.04322    | 0.54  | 3.8%   |
| Clcnka   | 0           | 0.00  |        |
| Clcnkb   | 0.01282394  | 0.01  | 112.5% |
| Cldn1    | 5.206062    | 1.08  | 20.7%  |
| Cldn10   | 1.0726112   | 0.12  | 10.8%  |
| Cldn11   | 0.287254    | 0.17  | 58.7%  |
| Cldn12   | 7.79274     | 0.38  | 4.8%   |

|         |             |      |        |
|---------|-------------|------|--------|
| Cldn13  | 0           | 0.00 |        |
| Cldn14  | 0.00358604  | 0.01 | 223.6% |
| Cldn15  | 0.06675274  | 0.03 | 41.3%  |
| Cldn16  | 0           | 0.00 |        |
| Cldn17  | 0           | 0.00 |        |
| Cldn18  | 0.09998548  | 0.07 | 71.5%  |
| Cldn19  | 0.03885744  | 0.02 | 55.1%  |
| Cldn2   | 0.06855704  | 0.02 | 30.2%  |
| Cldn23  | 0.1243958   | 0.03 | 27.0%  |
| Cldn3   | 0.04096852  | 0.03 | 64.3%  |
| Cldn4   | 0.01938234  | 0.02 | 107.0% |
| Cldn5   | 0.00419804  | 0.01 | 223.6% |
| Cldn6   | 0.1830028   | 0.09 | 47.1%  |
| Cldn7   | 0.07171826  | 0.05 | 66.1%  |
| Cldn8   | 0           | 0.00 |        |
| Cldn9   | 0           | 0.00 |        |
| Cldnd1  | 29.35864    | 2.37 | 8.1%   |
| Cldnd2  | 0           | 0.00 |        |
| Clec11a | 1.3060558   | 0.36 | 27.9%  |
| Clec12a | 0.01015292  | 0.02 | 152.5% |
| Clec14a | 0.007815872 | 0.01 | 104.5% |
| Clec16a | 12.1917     | 0.88 | 7.2%   |
| Clec1a  | 0.2071432   | 0.07 | 33.5%  |
| Clec1b  | 0.0138455   | 0.02 | 137.0% |
| Clec2d  | 0.4758546   | 0.09 | 17.9%  |
| Clec2e  | 0           | 0.00 |        |
| Clec2g  | 0.00361528  | 0.01 | 223.6% |
| Clec2h  | 0.0063362   | 0.01 | 137.0% |
| Clec2i  | 0           | 0.00 |        |
| Clec3a  | 0.0207646   | 0.05 | 223.6% |
| Clec3b  | 4.959812    | 1.22 | 24.6%  |
| Clec4a1 | 0.00401236  | 0.01 | 223.6% |
| Clec4a2 | 0.00857848  | 0.01 | 139.0% |
| Clec4a3 | 0           | 0.00 |        |
| Clec4a4 | 0           | 0.00 |        |
| Clec4b1 | 0           | 0.00 |        |
| Clec4b2 | 0           | 0.00 |        |
| Clec4d  | 0           | 0.00 |        |
| Clec4e  | 0           | 0.00 |        |
| Clec4f  | 0           | 0.00 |        |
| Clec4g  | 0           | 0.00 |        |
| Clec4n  | 0           | 0.00 |        |
| Clec5a  | 0.00527919  | 0.00 | 94.7%  |
| Clec6a  | 0           | 0.00 |        |
| Clec7a  | 0.02329748  | 0.02 | 94.4%  |
| Clec9a  | 0.0133189   | 0.02 | 137.0% |
| Clg     | 0.12784186  | 0.09 | 67.1%  |

|         |            |      |        |
|---------|------------|------|--------|
| Clgn    | 5.476106   | 0.42 | 7.7%   |
| Clc1    | 4.805534   | 0.85 | 17.6%  |
| Clc3    | 0.17773224 | 0.12 | 68.3%  |
| Clc4    | 8.902578   | 0.49 | 5.5%   |
| Clc5    | 0.06678194 | 0.03 | 47.7%  |
| Clc6    | 0.5749522  | 0.14 | 24.7%  |
| Clim1   | 0.02269122 | 0.00 | 21.7%  |
| Clint1  | 17.61558   | 0.43 | 2.5%   |
| Clip1   | 13.3648    | 0.88 | 6.6%   |
| Clip2   | 19.3075    | 0.42 | 2.2%   |
| Clip3   | 136.5646   | 5.59 | 4.1%   |
| Clip4   | 14.20042   | 0.73 | 5.1%   |
| Clip50  | 0.7633334  | 0.40 | 51.9%  |
| Clk1    | 23.90372   | 3.40 | 14.2%  |
| clk-1   | 0.1305943  | 0.03 | 21.8%  |
| Clk2    | 8.25528    | 0.54 | 6.6%   |
| Clk3    | 15.18474   | 0.52 | 3.4%   |
| Clk4    | 14.35612   | 1.44 | 10.0%  |
| CLM1-A  | 1.7505946  | 0.90 | 51.5%  |
| Clm3    | 0          | 0.00 |        |
| Clmn    | 0.9893308  | 0.17 | 17.0%  |
| Cln3    | 3.40284    | 0.36 | 10.6%  |
| Cln5    | 4.47662    | 0.49 | 10.9%  |
| Cln6    | 6.691046   | 0.22 | 3.3%   |
| Cln8    | 4.056642   | 0.17 | 4.3%   |
| Clnk    | 0.05929704 | 0.02 | 28.4%  |
| Clns1a  | 0.0331876  | 0.03 | 89.0%  |
| Clock   | 9.920948   | 0.68 | 6.9%   |
| Clp1    | 2.249342   | 0.21 | 9.5%   |
| Clpb    | 12.9521    | 0.69 | 5.3%   |
| Clpp    | 22.10456   | 2.30 | 10.4%  |
| Clps    | 0.2122768  | 0.07 | 32.3%  |
| Clptm1  | 51.43216   | 2.10 | 4.1%   |
| Clptm1l | 41.41798   | 2.24 | 5.4%   |
| Clpx    | 9.984208   | 0.57 | 5.7%   |
| Clrn1   | 0.01107918 | 0.02 | 136.9% |
| Clrn3   | 0          | 0.00 |        |
| Clspn   | 0.3756372  | 0.09 | 23.1%  |
| Clstn1  | 170.7234   | 3.52 | 2.1%   |
| Clstn2  | 13.59144   | 1.18 | 8.7%   |
| Clstn3  | 98.33866   | 4.18 | 4.2%   |
| Clta    | 110.5168   | 6.11 | 5.5%   |
| Cltb    | 82.91766   | 4.43 | 5.3%   |
| Cltc    | 159.5734   | 4.54 | 2.8%   |
| Clu     | 21.71322   | 3.30 | 15.2%  |
| Cluap1  | 8.564788   | 0.61 | 7.2%   |
| Clybl   | 7.103908   | 0.46 | 6.5%   |

|          |             |      |        |
|----------|-------------|------|--------|
| Cma1     | 0           | 0.00 |        |
| Cma2     | 0           | 0.00 |        |
| Cmah     | 0.00582102  | 0.01 | 138.4% |
| CMAH     | 0.000509782 | 0.00 | 223.6% |
| Cmas     | 54.73246    | 2.80 | 5.1%   |
| Cmbl     | 0.05724262  | 0.04 | 70.5%  |
| Cmklr1   | 0.0629865   | 0.01 | 18.9%  |
| Cml1     | 2.337634    | 0.22 | 9.4%   |
| Cml2     | 0.040791696 | 0.03 | 85.2%  |
| cml3     | 0.00331018  | 0.01 | 223.6% |
| Cml3     | 0           | 0.00 |        |
| Cml4     | 0           | 0.00 |        |
| Cml5     | 0           | 0.00 |        |
| Cmpk     | 63.3237     | 3.08 | 4.9%   |
| Cmtm2a   | 0           | 0.00 |        |
| Cmtm2b   | 0           | 0.00 |        |
| Cmtm3    | 4.457048    | 0.87 | 19.5%  |
| Cmtm4    | 7.681374    | 0.36 | 4.7%   |
| Cmtm5    | 3.27525     | 0.34 | 10.3%  |
| Cmtm6    | 3.704748    | 0.38 | 10.3%  |
| Cmtm7    | 1.1421596   | 0.20 | 17.7%  |
| Cmtm8    | 0.3751302   | 0.08 | 20.9%  |
| Cmya5    | 0.014116156 | 0.01 | 42.8%  |
| CN716893 | 0           | 0.00 |        |
| Cnbp     | 88.84482    | 1.15 | 1.3%   |
| Cnbp2    | 0           | 0.00 |        |
| Cndp1    | 0.0021729   | 0.00 | 223.6% |
| Cndp2    | 22.21724    | 1.78 | 8.0%   |
| Cnfn     | 0           | 0.00 |        |
| Cnga1    | 0.00537594  | 0.01 | 140.5% |
| Cnga2    | 0.0284033   | 0.01 | 48.9%  |
| Cnga3    | 0.00744504  | 0.01 | 154.0% |
| Cnga4    | 0.16701272  | 0.08 | 50.0%  |
| Cngb1b   | 0.035605846 | 0.02 | 64.9%  |
| Cngb3    | 0.00168418  | 0.00 | 223.6% |
| Cnih     | 44.12112    | 3.54 | 8.0%   |
| Cnih2    | 57.83998    | 7.39 | 12.8%  |
| Cnih3    | 5.369654    | 0.39 | 7.3%   |
| Cnih4    | 6.778868    | 0.74 | 10.9%  |
| Cnksr1   | 0.03446036  | 0.02 | 57.2%  |
| Cnksr2   | 3.6892      | 0.52 | 14.0%  |
| Cnksr3   | 0.4922144   | 0.06 | 11.6%  |
| Cnn1     | 0.3407874   | 0.08 | 22.6%  |
| Cnn2     | 6.061286    | 0.57 | 9.4%   |
| Cnn3     | 15.47474    | 1.45 | 9.3%   |
| Cnnm1    | 18.1269     | 2.44 | 13.4%  |
| Cnnm2    | 17.24904    | 0.72 | 4.2%   |

|          |            |      |       |
|----------|------------|------|-------|
| Cnm3     | 5.244934   | 0.31 | 5.9%  |
| Cnm4     | 2.5737     | 0.15 | 5.7%  |
| Cno      | 4.49684    | 0.35 | 7.9%  |
| Cnot1    | 28.27718   | 2.13 | 7.5%  |
| Cnot10   | 15.05176   | 0.33 | 2.2%  |
| Cnot2    | 13.94802   | 0.46 | 3.3%  |
| Cnot3    | 5.03778    | 0.81 | 16.0% |
| Cnot4    | 11.37236   | 0.44 | 3.9%  |
| Cnot6    | 8.969312   | 0.92 | 10.3% |
| Cnot6l   | 9.675232   | 0.54 | 5.6%  |
| Cnot7    | 39.18824   | 1.26 | 3.2%  |
| Cnot8    | 11.36184   | 0.63 | 5.6%  |
| Cnp      | 6.264134   | 0.66 | 10.5% |
| Cnpy1    | 0.03778632 | 0.02 | 56.9% |
| Cnr1     | 32.06016   | 2.65 | 8.3%  |
| Cnr2     | 0.04427086 | 0.03 | 67.7% |
| CNR3     | 0.19819998 | 0.09 | 47.1% |
| Cnt3     | 0          | 0.00 |       |
| Cntd1    | 0.346718   | 0.11 | 30.9% |
| Cntf     | 0.690691   | 0.22 | 32.0% |
| Cntfr    | 22.61404   | 2.00 | 8.8%  |
| Cntn1    | 138.7748   | 3.87 | 2.8%  |
| Cntn2    | 9.052066   | 0.37 | 4.1%  |
| Cntn3    | 2.760082   | 0.09 | 3.2%  |
| Cntn4    | 12.34568   | 0.90 | 7.3%  |
| Cntn5    | 4.523126   | 0.37 | 8.1%  |
| Cntn6    | 7.510142   | 0.45 | 6.0%  |
| Cntnap1  | 73.47142   | 6.38 | 8.7%  |
| Cntnap2  | 25.50548   | 1.47 | 5.8%  |
| Cntnap3  | 1.719974   | 0.13 | 7.6%  |
| Cntnap4  | 4.91125    | 0.23 | 4.7%  |
| Cntnap5a | 6.67592    | 0.83 | 12.4% |
| Cntnap5c | 0.8507338  | 0.13 | 15.1% |
| Cntrob   | 2.463154   | 0.15 | 6.3%  |
| Coasy    | 11.4076    | 0.19 | 1.7%  |
| Cobl     | 7.709274   | 0.55 | 7.1%  |
| Cobl1    | 0.8868428  | 0.15 | 17.3% |
| Coch     | 4.3139     | 0.44 | 10.1% |
| Cog1     | 9.155604   | 0.92 | 10.1% |
| Cog2     | 6.43757    | 0.21 | 3.3%  |
| Cog3     | 7.296006   | 0.31 | 4.2%  |
| Cog4     | 19.52576   | 1.09 | 5.6%  |
| Cog5     | 8.432596   | 0.51 | 6.1%  |
| Cog6     | 9.372712   | 0.26 | 2.8%  |
| Cog7     | 13.51616   | 0.33 | 2.5%  |
| Cog8     | 11.55262   | 0.57 | 5.0%  |
| Coil     | 7.553248   | 0.48 | 6.4%  |

|          |             |       |        |
|----------|-------------|-------|--------|
| Col10a1  | 0.1988652   | 0.05  | 23.2%  |
| Col11a1  | 2.791804    | 0.35  | 12.4%  |
| Col11a2  | 1.221366    | 0.14  | 11.1%  |
| Col12a1  | 1.4133462   | 0.30  | 21.2%  |
| Col13a1  | 0.04296872  | 0.03  | 75.6%  |
| Col14a1  | 4.265196    | 0.55  | 12.9%  |
| Col15a1  | 9.27285     | 2.21  | 23.8%  |
| Col16a1  | 1.3717762   | 0.28  | 20.7%  |
| Col17a1  | 0.02236975  | 0.01  | 45.8%  |
| Col18a1  | 1.80943     | 0.45  | 24.8%  |
| Col19a1  | 1.348852    | 0.12  | 9.2%   |
| Col1a1   | 19.762952   | 10.68 | 54.1%  |
| Col1a2   | 31.49716    | 8.19  | 26.0%  |
| Col20a1  | 0.2755104   | 0.09  | 31.2%  |
| Col22a1  | 0.6712188   | 0.10  | 15.6%  |
| Col23a1  | 1.888486    | 0.27  | 14.5%  |
| Col24a1  | 0.2222976   | 0.06  | 25.5%  |
| Col25a1  | 6.252476    | 0.81  | 13.0%  |
| Col27a1  | 0.5579612   | 0.05  | 9.1%   |
| Col28a1  | 0.2315208   | 0.05  | 22.9%  |
| Col2a1   | 0.3056368   | 0.04  | 11.6%  |
| Col3a1   | 106.78096   | 26.55 | 24.9%  |
| Col4a1   | 46.76358    | 7.45  | 15.9%  |
| Col4a2   | 33.19546    | 4.52  | 13.6%  |
| Col4a3   | 0.012754232 | 0.01  | 49.0%  |
| Col4a3bp | 16.79062    | 1.11  | 6.6%   |
| Col4a4   | 0.011012142 | 0.00  | 37.3%  |
| Col4a5   | 2.61228     | 0.35  | 13.3%  |
| Col4a6   | 0.331978    | 0.06  | 18.9%  |
| Col5a1   | 8.628138    | 2.97  | 34.4%  |
| Col5a2   | 5.694028    | 1.13  | 19.8%  |
| Col5a3   | 0.187837    | 0.03  | 16.7%  |
| Col6a1   | 24.76046    | 6.92  | 28.0%  |
| Col6a2   | 26.70632    | 7.70  | 28.8%  |
| Col6a3   | 14.443432   | 3.34  | 23.1%  |
| Col6a5   | 0.0940566   | 0.03  | 30.1%  |
| Col7a1   | 0.3836506   | 0.09  | 22.5%  |
| Col8a1   | 0.2996182   | 0.10  | 34.8%  |
| Col8a2   | 0.6382344   | 0.18  | 28.2%  |
| Col9a1   | 0.05177236  | 0.03  | 54.2%  |
| Col9a2   | 0.12374438  | 0.04  | 35.8%  |
| Col9a3   | 0.7443022   | 0.11  | 14.5%  |
| Colec10  | 0.005398464 | 0.01  | 150.1% |
| Colec11  | 0.01638762  | 0.01  | 58.7%  |
| Colec12  | 3.581022    | 0.74  | 20.7%  |
| Colq     | 0.02165934  | 0.02  | 86.8%  |
| Commd1   | 13.30082    | 0.87  | 6.5%   |

|         |            |      |       |
|---------|------------|------|-------|
| Commd10 | 9.185006   | 1.45 | 15.8% |
| Commd2  | 3.730992   | 0.27 | 7.3%  |
| Commd3  | 35.84852   | 1.35 | 3.8%  |
| Commd4  | 20.69864   | 1.31 | 6.3%  |
| Commd5  | 10.614574  | 0.74 | 7.0%  |
| Commd6  | 12.74224   | 0.62 | 4.9%  |
| Commd7  | 12.39688   | 0.48 | 3.9%  |
| Commd8  | 10.62196   | 0.38 | 3.6%  |
| Commd9  | 12.34458   | 0.41 | 3.4%  |
| Comp    | 0.04981946 | 0.03 | 51.7% |
| Comt    | 12.59038   | 0.41 | 3.3%  |
| Comtd1  | 3.716102   | 0.34 | 9.1%  |
| Copa    | 60.74572   | 2.61 | 4.3%  |
| Copb1   | 29.96946   | 1.40 | 4.7%  |
| Copb2   | 40.88728   | 2.00 | 4.9%  |
| Cope    | 36.85588   | 1.71 | 4.7%  |
| Cope1   | 2.31793    | 0.47 | 20.4% |
| Copg    | 107.002    | 3.09 | 2.9%  |
| Copg2   | 30.41188   | 1.48 | 4.9%  |
| Cops2   | 44.71372   | 1.03 | 2.3%  |
| COPS2   | 0.1807118  | 0.03 | 19.3% |
| Cops3   | 35.869     | 1.59 | 4.4%  |
| Cops4   | 40.53594   | 1.29 | 3.2%  |
| Cops5   | 55.37506   | 4.22 | 7.6%  |
| Cops6   | 51.70292   | 2.38 | 4.6%  |
| COPS6   | 4.525734   | 0.77 | 17.1% |
| Cops7a  | 35.0981    | 0.95 | 2.7%  |
| Cops7b  | 9.814176   | 0.89 | 9.1%  |
| COPS7b  | 0.8630686  | 0.43 | 50.4% |
| Cops8   | 31.11754   | 2.34 | 7.5%  |
| Copz1   | 55.2752    | 4.05 | 7.3%  |
| Copz2   | 2.20822    | 0.43 | 19.3% |
| Coq10a  | 12.46452   | 0.53 | 4.3%  |
| Coq10b  | 9.364774   | 0.73 | 7.8%  |
| Coq2    | 12.73474   | 0.92 | 7.2%  |
| Coq3    | 8.445722   | 0.40 | 4.8%  |
| Coq4    | 6.95637    | 1.53 | 22.0% |
| Coq5    | 16.57496   | 0.56 | 3.4%  |
| Coq6    | 9.64344    | 0.45 | 4.7%  |
| Coq7    | 12.91704   | 2.12 | 16.4% |
| Coq9    | 18.64914   | 0.68 | 3.7%  |
| Corin   | 0.04350093 | 0.03 | 59.2% |
| Corl2   | 0.3223586  | 0.08 | 25.2% |
| Coro1a  | 15.31504   | 0.63 | 4.1%  |
| Coro1b  | 26.36758   | 1.11 | 4.2%  |
| Coro1c  | 31.99726   | 3.52 | 11.0% |
| Coro2a  | 6.978574   | 3.91 | 56.0% |



|         |            |       |        |
|---------|------------|-------|--------|
| Coro2b  | 16.2045    | 0.87  | 5.4%   |
| Coro6   | 33.28736   | 7.01  | 21.1%  |
| Coro7   | 14.59534   | 0.67  | 4.6%   |
| Cort    | 0.12787212 | 0.08  | 60.3%  |
| cot     | 0.02631974 | 0.02  | 60.8%  |
| Cotl1   | 23.76748   | 2.72  | 11.4%  |
| Cox10   | 9.570064   | 0.57  | 5.9%   |
| Cox11   | 3.335708   | 0.41  | 12.4%  |
| Cox15   | 19.89188   | 1.19  | 6.0%   |
| Cox17   | 24.8286    | 1.65  | 6.7%   |
| Cox18   | 14.00694   | 0.98  | 7.0%   |
| Cox19   | 16.59616   | 1.69  | 10.2%  |
| Cox2    | 215.3946   | 27.58 | 12.8%  |
| COX4AL  | 0.742803   | 0.19  | 25.4%  |
| Cox4i1  | 317.967    | 13.54 | 4.3%   |
| Cox4i2  | 0.0725905  | 0.04  | 55.3%  |
| Cox4nb  | 13.33064   | 0.20  | 1.5%   |
| Cox5a   | 129.3154   | 8.19  | 6.3%   |
| Cox6a1  | 224.6466   | 20.82 | 9.3%   |
| Cox6a2  | 0.7784622  | 0.30  | 38.9%  |
| Cox6b1  | 195.0996   | 9.93  | 5.1%   |
| Cox6b2  | 10.639924  | 0.92  | 8.6%   |
| Cox6c   | 70.52384   | 4.44  | 6.3%   |
| Cox7a1  | 1.2223692  | 0.41  | 33.9%  |
| Cox7a2  | 98.87094   | 3.72  | 3.8%   |
| Cox7a2l | 49.96876   | 4.12  | 8.2%   |
| Cox7b   | 57.76354   | 2.97  | 5.1%   |
| Cox7b2  | 0.12544388 | 0.05  | 42.7%  |
| Cox7c   | 12.78804   | 0.85  | 6.6%   |
| Cox8a   | 335.6526   | 17.74 | 5.3%   |
| Cox8b   | 0.11544976 | 0.05  | 39.6%  |
| Cox8c   | 0          | 0.00  |        |
| Cp      | 2.063568   | 0.47  | 22.6%  |
| Cpa1    | 0.01080164 | 0.02  | 142.2% |
| Cpa2    | 0.09415136 | 0.03  | 36.0%  |
| Cpa3    | 0          | 0.00  |        |
| Cpa4    | 0.11335756 | 0.03  | 30.5%  |
| Cpa5    | 0.01215586 | 0.01  | 97.3%  |
| Cpa6    | 0.05111172 | 0.04  | 75.0%  |
| Cpb1    | 0.03229358 | 0.04  | 135.1% |
| Cpb2    | 0.01160552 | 0.02  | 145.6% |
| Cpd     | 6.240364   | 0.50  | 8.0%   |
| Cpe     | 348.2086   | 7.87  | 2.3%   |
| Cpeb1   | 12.5995    | 1.71  | 13.6%  |
| Cpeb2   | 23.64516   | 0.38  | 1.6%   |
| cpeb2   | 0.11448298 | 0.06  | 55.1%  |
| Cpeb3   | 21.78288   | 1.33  | 6.1%   |

|         |            |       |        |
|---------|------------|-------|--------|
| Cpeb4   | 27.25066   | 1.69  | 6.2%   |
| Cphx    | 0          | 0.00  |        |
| Cplx1   | 327.2848   | 12.50 | 3.8%   |
| Cplx2   | 62.60988   | 1.84  | 2.9%   |
| Cplx3   | 0.00979023 | 0.01  | 59.9%  |
| Cplx4   | 0.00385254 | 0.01  | 223.6% |
| Cpm     | 0.4262444  | 0.08  | 19.2%  |
| Cpn1    | 0.03590686 | 0.04  | 105.8% |
| Cpn2    | 0          | 0.00  |        |
| Cpne1   | 18.98218   | 0.46  | 2.4%   |
| Cpne2   | 1.320144   | 0.28  | 21.1%  |
| Cpne3   | 3.3102     | 0.36  | 11.0%  |
| Cpne4   | 6.219148   | 0.21  | 3.4%   |
| Cpne5   | 3.120414   | 0.71  | 22.7%  |
| Cpne6   | 0.5877376  | 0.06  | 9.4%   |
| Cpne7   | 0.6697442  | 0.11  | 16.3%  |
| Cpne8   | 3.476492   | 0.30  | 8.6%   |
| Cpne9   | 0.18161556 | 0.16  | 86.8%  |
| Cpox    | 6.354324   | 0.35  | 5.5%   |
| Cps1    | 0          | 0.00  |        |
| Cpsf1   | 14.71578   | 0.58  | 3.9%   |
| Cpsf2   | 13.06826   | 0.92  | 7.0%   |
| Cpsf3   | 13.8377    | 0.54  | 3.9%   |
| Cpsf3l  | 9.010594   | 0.74  | 8.2%   |
| Cpsf4   | 7.974102   | 0.17  | 2.2%   |
| Cpsf6   | 24.88422   | 0.84  | 3.4%   |
| Cpt1a   | 3.117906   | 0.47  | 15.1%  |
| Cpt1b   | 0.6536732  | 0.17  | 26.0%  |
| Cpt1c   | 22.56048   | 0.48  | 2.1%   |
| Cpt2    | 2.583206   | 0.17  | 6.7%   |
| Cpvl    | 0.01264516 | 0.02  | 147.5% |
| Cpxcr1  | 0          | 0.00  |        |
| Cpxm1   | 4.091794   | 0.16  | 4.0%   |
| Cpxm2   | 0.12736372 | 0.03  | 25.6%  |
| Cpz     | 0.2983542  | 0.16  | 53.0%  |
| Cr2     | 0.04317214 | 0.03  | 58.6%  |
| Crabp1  | 42.77618   | 12.58 | 29.4%  |
| Crabp2  | 0.08683202 | 0.04  | 45.2%  |
| Cradd   | 2.06105    | 0.11  | 5.1%   |
| Cramp1l | 3.619112   | 0.22  | 6.2%   |
| Crat    | 5.663862   | 0.20  | 3.5%   |
| Crb1    | 1.855034   | 0.13  | 7.1%   |
| Crb2    | 0.1761882  | 0.03  | 15.5%  |
| Crb3    | 0.3419024  | 0.15  | 44.7%  |
| Crbn    | 30.8026    | 2.72  | 8.8%   |
| Crcp    | 15.04204   | 0.53  | 3.5%   |
| Crct1   | 0.02319768 | 0.02  | 91.9%  |

|          |            |       |        |
|----------|------------|-------|--------|
| Creb1    | 6.064502   | 0.22  | 3.6%   |
| Creb3    | 18.15598   | 1.33  | 7.3%   |
| Creb3l1  | 4.710048   | 0.67  | 14.1%  |
| Creb3l2  | 5.352088   | 0.29  | 5.3%   |
| Creb3l3  | 0.0229266  | 0.02  | 82.0%  |
| Creb3l4  | 0.10764916 | 0.08  | 69.7%  |
| Creb5    | 0.12959504 | 0.06  | 47.1%  |
| Crebbp   | 6.27993    | 0.15  | 2.4%   |
| Crebl1   | 19.85678   | 1.81  | 9.1%   |
| Crebl2   | 11.007906  | 2.51  | 22.8%  |
| Crebzf   | 7.15508    | 0.54  | 7.5%   |
| Creg1    | 15.61212   | 0.77  | 4.9%   |
| Creg2    | 16.76286   | 1.51  | 9.0%   |
| Creld1   | 39.36088   | 1.46  | 3.7%   |
| Creld2   | 9.639628   | 0.83  | 8.7%   |
| Crem     | 2.649762   | 0.30  | 11.3%  |
| Crh      | 0.2173016  | 0.07  | 30.1%  |
| Crhbp    | 0.206752   | 0.07  | 34.7%  |
| Crhr1    | 4.086966   | 0.93  | 22.7%  |
| Crhr2    | 0.09470882 | 0.03  | 27.0%  |
| Crik     | 0.22964636 | 0.12  | 54.0%  |
| Crim1    | 13.33938   | 0.08  | 0.6%   |
| Crim2    | 0.2850822  | 0.10  | 33.9%  |
| Crip1    | 0.5363656  | 0.09  | 17.6%  |
| Crip2    | 3.988066   | 0.31  | 7.9%   |
| Crip3    | 0.7403246  | 0.18  | 24.9%  |
| Cript    | 25.68494   | 0.57  | 2.2%   |
| Crisp1   | 0.01432064 | 0.02  | 138.6% |
| Crisp2   | 0          | 0.00  |        |
| Crisp3   | 0.00638306 | 0.01  | 223.6% |
| Crisp4   | 0          | 0.00  |        |
| Crispld1 | 1.443064   | 0.26  | 18.0%  |
| Crispld2 | 0.12353164 | 0.05  | 41.5%  |
| Crk      | 41.58486   | 1.88  | 4.5%   |
| Crkl     | 15.57148   | 0.29  | 1.9%   |
| Crkr     | 0.00108255 | 0.00  | 223.6% |
| Crkrs    | 0.5075234  | 0.13  | 25.5%  |
| Crif1    | 2.648894   | 0.42  | 15.9%  |
| Crif3    | 2.46364    | 0.07  | 2.9%   |
| CRLM3    | 0.8899456  | 0.14  | 16.0%  |
| Crls1    | 14.18102   | 0.41  | 2.9%   |
| Crmp1    | 124.8858   | 17.08 | 13.7%  |
| Crmp5    | 0.419309   | 0.12  | 29.1%  |
| Crnkl1   | 3.646038   | 0.44  | 12.0%  |
| Crnn     | 0          | 0.00  |        |
| Crocc    | 2.040782   | 0.34  | 16.6%  |
| Crot     | 7.277368   | 0.51  | 7.0%   |

|          |            |      |        |
|----------|------------|------|--------|
| Crp      | 0.01222678 | 0.02 | 137.0% |
| Crry     | 2.965964   | 0.22 | 7.3%   |
| CRT      | 1.1556872  | 0.24 | 20.4%  |
| Crtac1   | 17.63998   | 1.23 | 7.0%   |
| Crtam    | 0.00607234 | 0.01 | 137.3% |
| Crtap    | 4.919446   | 0.88 | 18.0%  |
| Crtc1    | 14.91836   | 0.39 | 2.6%   |
| Crtc2    | 7.39682    | 0.23 | 3.1%   |
| Crtc3    | 2.256852   | 0.08 | 3.5%   |
| Crtr-1   | 0.04441264 | 0.06 | 141.9% |
| Crx      | 0          | 0.00 |        |
| Crxos1   | 0.01258174 | 0.01 | 106.1% |
| Cry1     | 3.826564   | 0.14 | 3.6%   |
| Cry2     | 16.11884   | 0.47 | 2.9%   |
| Cryaa    | 0          | 0.00 |        |
| Cryab    | 0.51808662 | 0.32 | 61.1%  |
| Cryba1   | 0          | 0.00 |        |
| Cryba2   | 0          | 0.00 |        |
| Cryba4   | 0.01297112 | 0.02 | 137.3% |
| Crybb1   | 0.05390092 | 0.04 | 70.3%  |
| Crybb2   | 0.0075101  | 0.02 | 223.6% |
| Crybb3   | 0.07417408 | 0.05 | 63.7%  |
| Cryga    | 0.09796764 | 0.06 | 58.6%  |
| Crygb    | 0          | 0.00 |        |
| Crygc    | 0          | 0.00 |        |
| Crygd    | 0          | 0.00 |        |
| Cryge    | 0          | 0.00 |        |
| Crygf    | 0          | 0.00 |        |
| Crygn    | 0.0484638  | 0.05 | 109.4% |
| Crygs    | 0          | 0.00 |        |
| Cryl1    | 3.76321    | 0.41 | 10.8%  |
| Crym     | 0.10563558 | 0.10 | 92.7%  |
| Cryz     | 5.769002   | 0.31 | 5.4%   |
| Cryzl1   | 22.59336   | 1.00 | 4.4%   |
| Cs       | 116.7676   | 6.95 | 6.0%   |
| Cs1      | 0          | 0.00 |        |
| CS444420 | 0          | 0.00 |        |
| CS444436 | 0          | 0.00 |        |
| CS444445 | 0          | 0.00 |        |
| CS444455 | 0          | 0.00 |        |
| CS444458 | 0          | 0.00 |        |
| CS444466 | 0          | 0.00 |        |
| CS444476 | 0          | 0.00 |        |
| CS444477 | 0          | 0.00 |        |
| CS444488 | 0          | 0.00 |        |
| CS444494 | 0          | 0.00 |        |
| CS444505 | 0          | 0.00 |        |

|          |             |      |        |
|----------|-------------|------|--------|
| CS444510 | 0           | 0.00 |        |
| CS447912 | 0           | 0.00 |        |
| CSA      | 1.4150918   | 0.65 | 45.8%  |
| Csad     | 5.610012    | 0.64 | 11.5%  |
| Csda     | 12.28488    | 1.68 | 13.7%  |
| Csdc2    | 78.58376    | 4.37 | 5.6%   |
| Csde1    | 48.91208    | 0.98 | 2.0%   |
| Cse1l    | 29.43802    | 0.90 | 3.1%   |
| Csf1     | 2.920214    | 0.34 | 11.6%  |
| Csf1r    | 0.018342068 | 0.02 | 84.5%  |
| Csf2     | 0           | 0.00 |        |
| Csf2ra   | 6.3091      | 0.54 | 8.5%   |
| Csf2rb   | 0.00151488  | 0.00 | 223.6% |
| Csf2rb2  | 0.00174104  | 0.00 | 223.6% |
| Csf3     | 0.0074573   | 0.02 | 223.6% |
| Csf3r    | 0.001602304 | 0.00 | 223.6% |
| Csk      | 30.26784    | 2.48 | 8.2%   |
| Cskn2a2  | 1.1549022   | 0.81 | 69.7%  |
| Csl      | 29.67418    | 2.04 | 6.9%   |
| Csmd1    | 3.118134    | 0.21 | 6.8%   |
| Csmd2    | 1.42889     | 0.16 | 11.5%  |
| Csmd3    | 3.746904    | 0.67 | 17.9%  |
| Csn1s1   | 0.00671068  | 0.02 | 223.6% |
| Csn1s2a  | 0           | 0.00 |        |
| Csn1s2b  | 0           | 0.00 |        |
| Csn2     | 0           | 0.00 |        |
| Csn3     | 0.03891512  | 0.05 | 126.7% |
| Csnk1a1  | 77.80852    | 2.60 | 3.3%   |
| Csnk1d   | 35.3179     | 1.02 | 2.9%   |
| Csnk1e   | 37.88566    | 1.29 | 3.4%   |
| Csnk1g1  | 4.59092     | 0.18 | 3.9%   |
| Csnk1g2  | 33.71878    | 1.85 | 5.5%   |
| Csnk1g3  | 15.05546    | 0.27 | 1.8%   |
| Csnk2a1  | 20.159      | 1.21 | 6.0%   |
| Csnk2a2  | 15.88008    | 0.63 | 4.0%   |
| Csnk2b   | 53.36892    | 4.03 | 7.5%   |
| Cspg2    | 2.74177     | 0.39 | 14.1%  |
| Cspg4    | 0.3632382   | 0.11 | 30.2%  |
| Cspg5    | 71.0625     | 6.16 | 8.7%   |
| Cspp1    | 4.510972    | 0.23 | 5.1%   |
| Csprs    | 0           | 0.00 |        |
| Csrp1    | 6.713444    | 0.45 | 6.7%   |
| Csrp2    | 3.378632    | 0.69 | 20.4%  |
| Csrp2bp  | 6.75419     | 0.47 | 7.0%   |
| Csrp3    | 0.02087422  | 0.02 | 93.1%  |
| Cst10    | 0           | 0.00 |        |
| Cst11    | 0           | 0.00 |        |

|          |             |       |        |
|----------|-------------|-------|--------|
| Cst12    | 0           | 0.00  |        |
| Cst13    | 0           | 0.00  |        |
| Cst3     | 177.3008    | 19.36 | 10.9%  |
| Cst6     | 0.10373178  | 0.01  | 14.2%  |
| Cst7     | 0           | 0.00  |        |
| Cst8     | 0           | 0.00  |        |
| Cst9     | 0           | 0.00  |        |
| Csta     | 0           | 0.00  |        |
| Cstad    | 0.2578136   | 0.10  | 37.4%  |
| Cstb     | 17.6747     | 1.34  | 7.6%   |
| Cstf1    | 9.398498    | 0.23  | 2.4%   |
| Cstf2    | 34.181      | 1.92  | 5.6%   |
| Cstf2t   | 26.52858    | 1.06  | 4.0%   |
| Cstf3    | 15.55024    | 1.31  | 8.4%   |
| Cstl1    | 0.1234223   | 0.07  | 54.5%  |
| Ctage5   | 9.471304    | 0.36  | 3.8%   |
| Ctbp1    | 63.41494    | 5.03  | 7.9%   |
| CtBP1    | 0.540617    | 0.12  | 21.6%  |
| Ctbp2    | 9.589376    | 0.29  | 3.1%   |
| CtBP2    | 0.0245536   | 0.02  | 62.3%  |
| Ctbs     | 1.987992    | 0.17  | 8.4%   |
| Ctcf     | 12.79564    | 0.53  | 4.2%   |
| Ctcf1    | 0.005403744 | 0.01  | 94.0%  |
| Ctdp1    | 3.424716    | 0.22  | 6.3%   |
| Ctdsp1   | 4.56531     | 0.28  | 6.0%   |
| Ctdsp2   | 7.704736    | 1.12  | 14.6%  |
| Ctdspl   | 2.265476    | 0.12  | 5.3%   |
| Ctdspl2  | 6.215296    | 0.37  | 5.9%   |
| Ctf1     | 0.4518636   | 0.05  | 10.0%  |
| Ctf2     | 0.02319434  | 0.03  | 150.6% |
| Ctgf     | 5.405292    | 0.60  | 11.1%  |
| Cth      | 1.864904    | 0.33  | 17.7%  |
| Cthrc1   | 0.3489174   | 0.12  | 33.6%  |
| Ctla2a   | 0.17035148  | 0.09  | 53.8%  |
| Ctla2b   | 0.00846636  | 0.02  | 223.6% |
| Ctla4    | 0.01000564  | 0.01  | 137.7% |
| ctla-4   | 0.0049727   | 0.01  | 223.6% |
| Ctnna1   | 7.859492    | 0.62  | 7.9%   |
| Ctnna2   | 44.4156     | 1.69  | 3.8%   |
| Ctnna3   | 0.4012408   | 0.10  | 25.9%  |
| Ctnnal1  | 2.247678    | 0.06  | 2.7%   |
| Ctnnb1   | 140.04      | 4.75  | 3.4%   |
| Ctnnbip1 | 25.09274    | 2.22  | 8.8%   |
| Ctnnbl1  | 6.553096    | 0.23  | 3.5%   |
| Ctnnd1   | 9.501446    | 0.59  | 6.3%   |
| Ctnnd2   | 47.8624     | 2.05  | 4.3%   |
| Ctns     | 3.04724     | 0.78  | 25.6%  |

|           |            |      |        |
|-----------|------------|------|--------|
| Ctps      | 18.12462   | 1.90 | 10.5%  |
| Ctps2     | 11.8423    | 0.32 | 2.7%   |
| Ctr9      | 12.83256   | 0.40 | 3.1%   |
| Ctrb1     | 0.02259876 | 0.04 | 158.0% |
| Ctrc      | 0          | 0.00 |        |
| Ctrl      | 0.3965812  | 0.15 | 37.3%  |
| Cts3      | 0          | 0.00 |        |
| Cts6      | 0          | 0.00 |        |
| Cts7      | 0          | 0.00 |        |
| Cts8      | 0          | 0.00 |        |
| Ctsa      | 13.8914    | 0.96 | 6.9%   |
| Ctsb      | 77.09634   | 9.13 | 11.8%  |
| Ctsc      | 1.57789    | 0.24 | 15.3%  |
| Ctsd      | 150.5078   | 2.87 | 1.9%   |
| Ctse      | 0.08071494 | 0.05 | 65.1%  |
| Ctsf      | 30.8774    | 3.11 | 10.1%  |
| Ctsg      | 0          | 0.00 |        |
| Ctsh      | 1.3751308  | 0.40 | 29.3%  |
| Ctsj      | 0          | 0.00 |        |
| Ctsk      | 0.9952134  | 0.21 | 21.0%  |
| Ctsl      | 64.62364   | 4.05 | 6.3%   |
| Ctsm      | 0          | 0.00 |        |
| Ctso      | 3.429736   | 0.36 | 10.4%  |
| Ctsq      | 0          | 0.00 |        |
| Ctsr      | 0          | 0.00 |        |
| Ctss      | 0          | 0.00 |        |
| Ctsw      | 0.03659774 | 0.03 | 83.7%  |
| Ctsz      | 3.785202   | 0.97 | 25.6%  |
| Cttn      | 39.91704   | 2.50 | 6.3%   |
| Cttnbp2   | 6.480312   | 0.57 | 8.8%   |
| Cttnbp2nl | 6.27578    | 0.76 | 12.2%  |
| Ctxn1     | 17.2933    | 2.82 | 16.3%  |
| Cubn      | 0.1829754  | 0.04 | 22.8%  |
| Cuedc1    | 7.536758   | 0.36 | 4.8%   |
| Cuedc2    | 67.50836   | 3.88 | 5.7%   |
| Cugbp1    | 15.32024   | 1.70 | 11.1%  |
| Cugbp2    | 17.68154   | 0.55 | 3.1%   |
| Cul1      | 33.86916   | 0.84 | 2.5%   |
| Cul2      | 26.4431    | 1.53 | 5.8%   |
| Cul3      | 49.00888   | 1.60 | 3.3%   |
| Cul4a     | 22.85694   | 0.99 | 4.3%   |
| Cul4b     | 21.18616   | 0.32 | 1.5%   |
| Cul5      | 15.2673    | 1.28 | 8.4%   |
| Cul7      | 22.6276    | 0.79 | 3.5%   |
| Cuta      | 26.91866   | 1.35 | 5.0%   |
| Cutc      | 2.02789    | 0.32 | 15.7%  |
| Cutl1     | 21.66546   | 0.76 | 3.5%   |

|              |             |      |        |
|--------------|-------------|------|--------|
| Cutl2        | 6.778326    | 0.29 | 4.3%   |
| Cux/CDP(1B1) | 0.090995484 | 0.12 | 136.3% |
| Cuzd1        | 0.00787022  | 0.01 | 144.3% |
| Cwc15        | 24.22692    | 0.82 | 3.4%   |
| Cwf1911      | 7.113632    | 0.42 | 5.9%   |
| Cwf1912      | 3.48145     | 0.36 | 10.2%  |
| Cx3cl1       | 50.16282    | 4.44 | 8.9%   |
| Cx3cr1       | 0           | 0.00 |        |
| Cxadr        | 12.84098    | 3.05 | 23.7%  |
| Cxcl1        | 0.09770804  | 0.06 | 61.2%  |
| Cxcl10       | 0.01039328  | 0.02 | 164.4% |
| Cxcl11       | 0           | 0.00 |        |
| Cxcl12       | 3.44691     | 0.46 | 13.4%  |
| Cxcl13       | 0.02250806  | 0.02 | 108.2% |
| Cxcl14       | 6.219894    | 0.70 | 11.2%  |
| Cxcl15       | 0.00379468  | 0.01 | 223.6% |
| Cxcl16       | 0.04053114  | 0.02 | 52.3%  |
| Cxcl2        | 0           | 0.00 |        |
| Cxcl3        | 0           | 0.00 |        |
| Cxcl4        | 0           | 0.00 |        |
| Cxcl5        | 0.2695874   | 0.11 | 39.1%  |
| Cxcl9        | 0.00277124  | 0.01 | 223.6% |
| Cxcr3        | 0           | 0.00 |        |
| Cxcr4        | 1.630282    | 0.21 | 13.1%  |
| Cxcr6        | 0.01177092  | 0.02 | 148.3% |
| Cxcr7        | 2.353864    | 0.25 | 10.6%  |
| Cxx1a        | 6.831684    | 0.51 | 7.5%   |
| Cxx1b        | 12.09442    | 0.75 | 6.2%   |
| Cxx1c        | 2.031366    | 0.20 | 10.0%  |
| Cxxc1        | 7.7314      | 0.40 | 5.2%   |
| Cxxc4        | 3.733652    | 0.34 | 9.0%   |
| Cxxc5        | 12.07926    | 1.10 | 9.1%   |
| Cxxc6        | 2.724552    | 0.29 | 10.8%  |
| Cyb5         | 20.35752    | 2.11 | 10.4%  |
| Cyb561       | 25.42974    | 0.98 | 3.9%   |
| Cyb561d1     | 1.85406     | 0.28 | 15.2%  |
| Cyb561d2     | 6.108972    | 0.50 | 8.2%   |
| Cyb5b        | 40.36224    | 2.81 | 7.0%   |
| Cyb5d1       | 2.075376    | 0.35 | 16.9%  |
| Cyb5d2       | 0.2766906   | 0.10 | 34.8%  |
| Cyb5r1       | 8.440986    | 1.04 | 12.3%  |
| Cyb5r2       | 0.05602042  | 0.07 | 126.5% |
| Cyb5r3       | 35.8651     | 3.51 | 9.8%   |
| Cyb5r4       | 2.751152    | 0.33 | 12.0%  |
| Cyba         | 0.4242192   | 0.15 | 36.1%  |
| Cybasc3      | 8.55072     | 0.78 | 9.1%   |
| Cybb         | 0.0020607   | 0.00 | 223.6% |



|         |             |      |        |
|---------|-------------|------|--------|
| Cybrd1  | 0.7334448   | 0.17 | 23.6%  |
| Cyc1    | 139.6254    | 4.04 | 2.9%   |
| Cycs    | 2.980762    | 0.08 | 2.7%   |
| Cyct    | 0.01073516  | 0.02 | 223.6% |
| Cyfp1   | 7.574058    | 0.21 | 2.7%   |
| Cyfp2   | 69.33814    | 1.32 | 1.9%   |
| Cygb    | 24.40232    | 2.19 | 9.0%   |
| Cyhr1   | 40.40112    | 2.30 | 5.7%   |
| Cylc1   | 0           | 0.00 |        |
| Cyld    | 8.724706    | 1.08 | 12.3%  |
| Cyp11a1 | 0.1999064   | 0.04 | 19.5%  |
| Cyp11b1 | 0.00509004  | 0.01 | 137.3% |
| Cyp11b2 | 0           | 0.00 |        |
| Cyp17a1 | 0.0107049   | 0.01 | 94.7%  |
| Cyp19a1 | 0.02331928  | 0.01 | 46.2%  |
| Cyp1a1  | 0.024759722 | 0.01 | 53.9%  |
| Cyp1a2  | 0           | 0.00 |        |
| Cyp1b1  | 3.001718    | 0.63 | 21.1%  |
| Cyp20a1 | 3.981744    | 0.25 | 6.3%   |
| Cyp21a1 | 0           | 0.00 |        |
| Cyp24a1 | 0.1254188   | 0.02 | 16.9%  |
| Cyp26a1 | 2.735866    | 0.68 | 24.8%  |
| Cyp26b1 | 2.21885     | 0.26 | 11.5%  |
| Cyp27a1 | 0.0637672   | 0.03 | 51.7%  |
| Cyp27b1 | 0.05950166  | 0.02 | 36.7%  |
| Cyp2a12 | 0           | 0.00 |        |
| Cyp2a4  | 0           | 0.00 |        |
| Cyp2a5  | 0           | 0.00 |        |
| Cyp2ab1 | 0.00702384  | 0.01 | 144.1% |
| Cyp2b10 | 0.00420982  | 0.01 | 223.6% |
| Cyp2b13 | 0           | 0.00 |        |
| Cyp2b19 | 0           | 0.00 |        |
| Cyp2b23 | 0.00306252  | 0.01 | 223.6% |
| Cyp2b9  | 0           | 0.00 |        |
| Cyp2c29 | 0           | 0.00 |        |
| Cyp2c37 | 0           | 0.00 |        |
| Cyp2c38 | 0           | 0.00 |        |
| Cyp2c39 | 0           | 0.00 |        |
| Cyp2c40 | 0           | 0.00 |        |
| Cyp2c44 | 0.0076554   | 0.01 | 138.6% |
| Cyp2c50 | 0           | 0.00 |        |
| Cyp2c54 | 0           | 0.00 |        |
| Cyp2c55 | 0.02853134  | 0.04 | 127.4% |
| Cyp2c65 | 0.0706661   | 0.03 | 37.7%  |
| Cyp2c66 | 0.01341054  | 0.02 | 142.5% |
| Cyp2c67 | 0           | 0.00 |        |
| Cyp2c68 | 0           | 0.00 |        |

|          |             |      |        |
|----------|-------------|------|--------|
| Cyp2c69  | 0           | 0.00 |        |
| Cyp2c70  | 0           | 0.00 |        |
| Cyp2d10  | 0           | 0.00 |        |
| Cyp2d11  | 0           | 0.00 |        |
| Cyp2d12  | 0           | 0.00 |        |
| Cyp2d13  | 0.00340486  | 0.01 | 223.6% |
| Cyp2d22  | 0.16866694  | 0.06 | 35.9%  |
| Cyp2d26  | 0.01524116  | 0.02 | 116.8% |
| Cyp2d34  | 0           | 0.00 |        |
| Cyp2d40  | 0.02223884  | 0.02 | 102.3% |
| Cyp2d9   | 0           | 0.00 |        |
| Cyp2e1   | 0.00364998  | 0.01 | 223.6% |
| Cyp2f2   | 0.02497228  | 0.01 | 49.3%  |
| Cyp2g1   | 0           | 0.00 |        |
| Cyp2j11  | 0.00300078  | 0.01 | 223.6% |
| Cyp2j12  | 0.00340714  | 0.01 | 223.6% |
| Cyp2j13  | 0.007653088 | 0.01 | 118.2% |
| Cyp2j5   | 0.0020371   | 0.00 | 223.6% |
| Cyp2j6   | 2.15362     | 0.38 | 17.7%  |
| Cyp2j7   | 0           | 0.00 |        |
| Cyp2j8   | 0.03278746  | 0.06 | 186.9% |
| Cyp2j9   | 0.3168754   | 0.04 | 13.1%  |
| Cyp2r1   | 0.0575993   | 0.04 | 72.1%  |
| Cyp2s1   | 0.5846358   | 0.17 | 28.7%  |
| Cyp2t4   | 0.2453756   | 0.02 | 7.9%   |
| Cyp2u1   | 3.780408    | 0.29 | 7.8%   |
| Cyp39a1  | 0.4496436   | 0.02 | 5.3%   |
| Cyp3a11  | 0           | 0.00 |        |
| Cyp3a13  | 0.01942766  | 0.01 | 26.7%  |
| Cyp3a16  | 0           | 0.00 |        |
| Cyp3a25  | 0           | 0.00 |        |
| Cyp3a41a | 0           | 0.00 |        |
| Cyp3a44  | 0           | 0.00 |        |
| Cyp3a57  | 0.00573752  | 0.01 | 223.6% |
| Cyp46a1  | 31.28188    | 1.84 | 5.9%   |
| Cyp4a10  | 0.00265732  | 0.01 | 223.6% |
| Cyp4a12a | 0           | 0.00 |        |
| Cyp4a12b | 0.00719626  | 0.01 | 137.0% |
| Cyp4a14  | 0           | 0.00 |        |
| Cyp4a29  | 0           | 0.00 |        |
| Cyp4a30b | 0           | 0.00 |        |
| Cyp4a31  | 0           | 0.00 |        |
| Cyp4a32  | 0           | 0.00 |        |
| Cyp4b1   | 0.10510832  | 0.03 | 24.6%  |
| Cyp4f13  | 1.960256    | 0.12 | 6.1%   |
| Cyp4f14  | 0.1696104   | 0.06 | 36.7%  |
| Cyp4f15  | 0.3144598   | 0.07 | 21.1%  |

|               |            |       |        |
|---------------|------------|-------|--------|
| Cyp4f16       | 1.493396   | 0.19  | 13.0%  |
| Cyp4f18       | 0.0074702  | 0.01  | 141.6% |
| Cyp4f37       | 0.14292602 | 0.04  | 28.5%  |
| Cyp4f39       | 0.01831014 | 0.01  | 47.5%  |
| Cyp4v3        | 0.601071   | 0.10  | 16.2%  |
| Cyp4x1        | 1.782246   | 0.22  | 12.1%  |
| Cyp51         | 41.68494   | 5.59  | 13.4%  |
| Cyp7a1        | 0          | 0.00  |        |
| Cyp7b1        | 2.95528    | 0.47  | 15.8%  |
| Cyp8b1        | 0          | 0.00  |        |
| Cypt10        | 0          | 0.00  |        |
| Cypt2         | 0          | 0.00  |        |
| Cypt3         | 0.0106215  | 0.02  | 223.6% |
| Cypt7         | 0          | 0.00  |        |
| Cypt8         | 0          | 0.00  |        |
| Cyr61         | 1.2015462  | 0.25  | 20.8%  |
| Cys1          | 0.6835166  | 0.15  | 21.8%  |
| Cysltr1       | 0.00318546 | 0.01  | 223.6% |
| Cysltr2       | 0          | 0.00  |        |
| Cyt1          | 0.00320466 | 0.01  | 223.6% |
| Cyt19         | 0.2892648  | 0.18  | 61.6%  |
| Cyt11         | 0.0028466  | 0.01  | 223.6% |
| Cytor4        | 0.03237216 | 0.01  | 17.7%  |
| Cyrr1         | 0.0108818  | 0.01  | 94.8%  |
| D030011O10Rik | 10.65568   | 0.60  | 5.6%   |
| D030016E14Rik | 16.4927    | 0.53  | 3.2%   |
| D030022P06Rik | 4.477596   | 0.47  | 10.6%  |
| D030041N04Rik | 4.142268   | 0.27  | 6.6%   |
| D030051N19Rik | 13.46362   | 0.44  | 3.3%   |
| D030056L22Rik | 8.415248   | 0.52  | 6.2%   |
| D030070L09Rik | 12.41494   | 0.99  | 8.0%   |
| D030074E01Rik | 17.31054   | 0.50  | 2.9%   |
| D0H4S114      | 107.12808  | 16.87 | 15.7%  |
| D0HXS9928E    | 12.87938   | 0.88  | 6.8%   |
| D10627        | 3.428786   | 0.15  | 4.5%   |
| D10920        | 3.806848   | 0.32  | 8.5%   |
| D10Bwg1364e   | 47.56086   | 4.14  | 8.7%   |
| D10Bwg1379e   | 7.05364    | 1.06  | 15.0%  |
| D10Ertd322e   | 20.04462   | 1.67  | 8.3%   |
| D10Ertd610e   | 26.60604   | 1.72  | 6.4%   |
| D10Ertd641e   | 16.58732   | 0.58  | 3.5%   |
| D10Jhu81e     | 28.93738   | 1.00  | 3.5%   |
| D10Wsu102e    | 9.32489    | 0.60  | 6.4%   |
| D10Wsu52e     | 49.47838   | 1.09  | 2.2%   |
| D11Bwg0434e   | 65.82446   | 5.17  | 7.8%   |
| D11Bwg0517e   | 26.0409    | 2.02  | 7.8%   |
| D11Ertd636e   | 0.04356472 | 0.01  | 33.2%  |

|               |            |      |        |
|---------------|------------|------|--------|
| D11lgp2       | 0.05066164 | 0.05 | 103.9% |
| D11Wsu47e     | 2.474948   | 0.21 | 8.7%   |
| D11Wsu99e     | 6.119018   | 0.11 | 1.8%   |
| D12Ertd551e   | 8.994258   | 0.77 | 8.6%   |
| D12Ertd553e   | 16.04862   | 1.51 | 9.4%   |
| D12Ertd647e   | 3.723568   | 0.74 | 19.9%  |
| D130029J02Rik | 12.5793    | 1.01 | 8.1%   |
| D130040H23Rik | 0.7702612  | 0.13 | 17.5%  |
| D130043K22Rik | 7.168588   | 0.56 | 7.8%   |
| D130054N24Rik | 3.114836   | 0.20 | 6.4%   |
| D130059P03Rik | 3.260588   | 0.38 | 11.5%  |
| D13Wsu177e    | 9.395914   | 0.68 | 7.3%   |
| D14Abb1e      | 2.964268   | 0.26 | 8.7%   |
| D14Ertd171e   | 20.87596   | 0.93 | 4.5%   |
| D14Ertd436e   | 4.305942   | 0.39 | 9.1%   |
| D14Ertd449e   | 0.2271227  | 0.10 | 44.6%  |
| D14Ertd500e   | 1.518434   | 0.13 | 8.6%   |
| D14Ertd581e   | 2.961156   | 0.68 | 22.9%  |
| D14Ertd668e   | 0.0356744  | 0.03 | 80.2%  |
| D15Ertd621e   | 20.80756   | 0.93 | 4.5%   |
| D15Mgi27      | 20.26904   | 1.20 | 5.9%   |
| D15Wsu169e    | 16.70606   | 0.81 | 4.9%   |
| D15Wsu75e     | 28.72132   | 2.39 | 8.3%   |
| D16605        | 0          | 0.00 |        |
| D16Ertd472e   | 0.4775858  | 0.07 | 13.9%  |
| D16Ertd642e   | 0.03789124 | 0.02 | 52.9%  |
| D16H22S680E   | 48.89466   | 1.84 | 3.8%   |
| D17H6S53E     | 3.63249    | 0.29 | 8.1%   |
| D17H6S56E-3   | 0.03659266 | 0.01 | 22.4%  |
| D17H6S56E-5   | 1.320164   | 0.21 | 15.9%  |
| D17Wsu104e    | 23.4118    | 2.16 | 9.2%   |
| D17Wsu92e     | 27.06298   | 1.31 | 4.8%   |
| D18Ertd653e   | 3.656438   | 0.36 | 9.9%   |
| D19Bwg1357e   | 9.114298   | 0.93 | 10.2%  |
| D19Ertd386e   | 2.683276   | 0.15 | 5.5%   |
| D19Ertd652e   | 0.14341628 | 0.28 | 193.9% |
| D19Ertd721e   | 35.78674   | 3.18 | 8.9%   |
| D19Ertd737e   | 11.42414   | 1.17 | 10.3%  |
| D19Wsu162e    | 13.30292   | 0.83 | 6.2%   |
| D1Bwg0212e    | 7.209778   | 0.13 | 1.8%   |
| D1Bwg1363e    | 29.30378   | 2.30 | 7.9%   |
| D1Ertd622e    | 13.73164   | 0.57 | 4.2%   |
| D1Pas1        | 1.440016   | 0.03 | 2.2%   |
| D230004J03Rik | 17.03494   | 0.63 | 3.7%   |
| D230007K08Rik | 0.0396668  | 0.02 | 59.6%  |
| D230010M03Rik | 2.993758   | 0.25 | 8.5%   |
| D230012E17Rik | 12.81716   | 1.85 | 14.5%  |

|               |            |      |        |
|---------------|------------|------|--------|
| D230014K01Rik | 2.910698   | 0.24 | 8.2%   |
| D230025D16Rik | 8.75111    | 0.39 | 4.5%   |
| D230037D09Rik | 7.278058   | 0.74 | 10.2%  |
| D230039L06Rik | 2.55074    | 0.74 | 29.0%  |
| D230044M03Rik | 0.01402224 | 0.02 | 138.2% |
| D2Bwg1335e    | 5.854692   | 0.19 | 3.2%   |
| D2Ertd391e    | 18.73392   | 1.60 | 8.5%   |
| D2Ertd750e    | 0.8781286  | 0.08 | 8.8%   |
| D2hgdh        | 2.03922    | 0.14 | 6.9%   |
| D2Wsu81e      | 10.435168  | 0.57 | 5.5%   |
| D330001F17Rik | 1.75146    | 0.34 | 19.5%  |
| D330012F22Rik | 2.34854    | 0.18 | 7.5%   |
| D330017J20Rik | 6.663846   | 0.38 | 5.6%   |
| D330022A01Rik | 0.17239    | 0.10 | 55.8%  |
| D330028D13Rik | 1.044213   | 0.20 | 19.6%  |
| D330037H05Rik | 0.14000648 | 0.06 | 41.0%  |
| D330038O06Rik | 6.659394   | 0.34 | 5.1%   |
| D330045A20Rik | 0.02840092 | 0.02 | 84.2%  |
| D3Bwg0562e    | 20.38828   | 2.16 | 10.6%  |
| D3Ertd300e    | 10.072384  | 0.81 | 8.0%   |
| D3Ertd751e    | 3.151834   | 0.34 | 10.8%  |
| D3Ucla1       | 23.77064   | 0.66 | 2.8%   |
| D430015B01Rik | 4.156592   | 0.29 | 6.9%   |
| D430028G21Rik | 1.71257    | 0.03 | 1.9%   |
| D430033N04Rik | 0.768171   | 0.18 | 23.4%  |
| D430039N05Rik | 27.87208   | 1.54 | 5.5%   |
| D430041B17Rik | 8.734584   | 0.50 | 5.7%   |
| D430041D05Rik | 11.8303    | 0.27 | 2.3%   |
| D430042O09Rik | 2.54752    | 0.17 | 6.9%   |
| D4Bwg0951e    | 6.835584   | 0.70 | 10.3%  |
| D4Cole1e      | 1.296076   | 0.16 | 12.7%  |
| D4Ertd196e    | 19.56222   | 1.38 | 7.1%   |
| D4Ertd22e     | 6.89662    | 0.70 | 10.2%  |
| D4Ertd429e    | 16.25388   | 1.08 | 6.6%   |
| D4Wsu114e     | 1.437264   | 0.18 | 12.3%  |
| D4Wsu132e     | 7.491404   | 0.43 | 5.7%   |
| D4Wsu53e      | 76.30684   | 9.15 | 12.0%  |
| D530005L17Rik | 2.0535     | 0.20 | 10.0%  |
| D530033C11Rik | 2.048464   | 0.20 | 9.9%   |
| D5Ertd135e    | 0.339765   | 0.11 | 32.1%  |
| D5Ertd40e     | 2.814222   | 0.22 | 7.7%   |
| D5Ertd577e    | 0          | 0.00 |        |
| D5Ertd579e    | 19.103     | 0.81 | 4.2%   |
| D5Ertd585e    | 5.746198   | 0.22 | 3.8%   |
| D5Ertd593e    | 0.15530702 | 0.05 | 34.6%  |
| D5Wsu178e     | 18.74788   | 0.81 | 4.3%   |
| D630002G06Rik | 0.01996854 | 0.02 | 104.6% |

|               |             |      |        |
|---------------|-------------|------|--------|
| D630002J15Rik | 0           | 0.00 |        |
| D630003M21Rik | 0.8841546   | 0.13 | 15.0%  |
| D630004A14Rik | 1.83774     | 0.17 | 9.3%   |
| D630023B12Rik | 4.012606    | 0.19 | 4.9%   |
| D630023F18Rik | 1.763458    | 0.24 | 13.9%  |
| D630037F22Rik | 2.286568    | 0.27 | 11.8%  |
| D630039A03Rik | 0.219093    | 0.04 | 18.0%  |
| D630040G17Rik | 7.06094     | 0.55 | 7.8%   |
| D630042F21Rik | 0.002382    | 0.01 | 223.6% |
| D630042P16Rik | 0.00394748  | 0.01 | 223.6% |
| D630044L22Rik | 0.1959448   | 0.02 | 8.7%   |
| D630045J12Rik | 3.946782    | 0.29 | 7.4%   |
| D6Mm5e        | 0.0250755   | 0.03 | 100.4% |
| D6Wsu116e     | 22.09182    | 0.95 | 4.3%   |
| D6Wsu163e     | 9.361612    | 0.31 | 3.3%   |
| D6Wsu176e     | 41.13254    | 3.84 | 9.3%   |
| D730001G18Rik | 0.00415158  | 0.01 | 223.6% |
| D730039F16Rik | 0.04627094  | 0.03 | 71.2%  |
| D730040F13Rik | 4.101162    | 0.40 | 9.7%   |
| D730048I06Rik | 0           | 0.00 |        |
| D830007B15Rik | 1.248896    | 0.09 | 7.6%   |
| D830007F02Rik | 0.02772038  | 0.01 | 38.3%  |
| D830014E11Rik | 0.0353138   | 0.03 | 85.2%  |
| D830029A09Rik | 0.09273354  | 0.02 | 17.2%  |
| D830030K20Rik | 0.15710382  | 0.04 | 28.6%  |
| D8Ertd457e    | 14.37812    | 0.82 | 5.7%   |
| D8Ertd587e    | 4.239998    | 0.42 | 9.9%   |
| D8Ertd738e    | 39.2966     | 4.50 | 11.5%  |
| D8Ertd82e     | 5.903312    | 0.30 | 5.1%   |
| D930001I22Rik | 8.268888    | 0.53 | 6.5%   |
| D930005D10Rik | 3.964952    | 0.34 | 8.5%   |
| D930014E17Rik | 1.4648748   | 1.19 | 80.9%  |
| D930015E06Rik | 4.195096    | 0.21 | 5.0%   |
| D930017K21Rik | 0.01776776  | 0.04 | 223.6% |
| D930020B18Rik | 0.036694982 | 0.03 | 90.4%  |
| D930020E02Rik | 0.0142016   | 0.02 | 106.0% |
| D930028F11Rik | 0.7372198   | 0.12 | 16.5%  |
| D930036F22Rik | 0.222417    | 0.06 | 26.3%  |
| D930048N14Rik | 2.590354    | 0.22 | 8.6%   |
| D9Ertd280e    | 0.3001706   | 0.02 | 6.4%   |
| D9Ertd402e    | 5.264798    | 0.43 | 8.2%   |
| D9Mgc48e      | 0.4642594   | 0.12 | 26.6%  |
| Daam1         | 20.83948    | 1.96 | 9.4%   |
| Daam2         | 1.0198422   | 0.19 | 18.9%  |
| Dab1          | 24.32814    | 1.67 | 6.9%   |
| Dab2          | 3.95076     | 0.65 | 16.5%  |
| Dab2ip        | 11.5272     | 0.24 | 2.1%   |

|         |            |      |        |
|---------|------------|------|--------|
| Dach1   | 5.045966   | 0.32 | 6.4%   |
| Dach2   | 2.691564   | 0.49 | 18.3%  |
| Dact1   | 3.566042   | 0.31 | 8.6%   |
| Dact2   | 5.36939    | 0.32 | 6.0%   |
| Dact3   | 24.38906   | 1.46 | 6.0%   |
| Dad1    | 62.735     | 3.92 | 6.2%   |
| Daf2    | 0.0371648  | 0.03 | 68.5%  |
| Dag1    | 21.28002   | 0.62 | 2.9%   |
| Dagla   | 13.2739    | 0.78 | 5.8%   |
| Daglb   | 6.074006   | 0.63 | 10.4%  |
| Dak     | 4.266622   | 0.52 | 12.2%  |
| Dalrd3  | 20.03832   | 0.77 | 3.8%   |
| Dand5   | 0.089878   | 0.03 | 32.6%  |
| Dao1    | 0.01377582 | 0.01 | 96.5%  |
| Dap     | 6.050654   | 0.87 | 14.4%  |
| Dap3    | 28.54438   | 0.61 | 2.1%   |
| Dapk1   | 13.188     | 0.50 | 3.8%   |
| Dapk2   | 0.16293742 | 0.06 | 39.6%  |
| DAPK2   | 0.02055904 | 0.01 | 61.5%  |
| Dapk3   | 14.71268   | 0.76 | 5.2%   |
| Dapl1   | 0.0111318  | 0.02 | 223.6% |
| Dapp1   | 0.07298204 | 0.03 | 46.2%  |
| Darc    | 22.27738   | 1.13 | 5.1%   |
| Dars    | 28.69178   | 2.38 | 8.3%   |
| Dars2   | 5.758544   | 0.31 | 5.4%   |
| Daxx    | 6.20844    | 0.36 | 5.8%   |
| Dazap1  | 16.56126   | 1.24 | 7.5%   |
| Dazap2  | 31.83392   | 1.23 | 3.9%   |
| Dazl    | 0.257398   | 0.05 | 20.3%  |
| Dbc1    | 43.06386   | 2.58 | 6.0%   |
| Dbf4    | 0.9384288  | 0.05 | 5.7%   |
| Dbh     | 0.00860838 | 0.01 | 92.4%  |
| Dbi     | 72.4258    | 2.79 | 3.8%   |
| Dbil5   | 0.12354218 | 0.07 | 59.9%  |
| Dbn1    | 43.41808   | 3.15 | 7.3%   |
| Dbnidd1 | 10.67902   | 0.39 | 3.6%   |
| Dbnidd2 | 11.33972   | 0.52 | 4.6%   |
| Dbnl    | 31.97512   | 2.40 | 7.5%   |
| Dbp     | 6.655494   | 1.64 | 24.6%  |
| Dbpht2  | 1.706898   | 0.17 | 9.9%   |
| Dbr1    | 3.3016     | 0.15 | 4.5%   |
| Dbt     | 5.995916   | 0.10 | 1.7%   |
| Dbx1    | 0          | 0.00 |        |
| Dbx2    | 0.4566704  | 0.07 | 15.8%  |
| dby     | 0.0798447  | 0.01 | 14.0%  |
| Dcakd   | 45.51004   | 5.91 | 13.0%  |
| Dcamkl1 | 13.01094   | 1.34 | 10.3%  |

|          |             |      |        |
|----------|-------------|------|--------|
| Dcamk12  | 7.450502    | 1.82 | 24.5%  |
| Dcbld1   | 5.555938    | 0.32 | 5.8%   |
| Dcbld2   | 12.48156    | 1.21 | 9.7%   |
| Dcc      | 7.876028    | 0.77 | 9.8%   |
| Dcdc2    | 0.2196586   | 0.08 | 37.5%  |
| Dcdc2a   | 0.02282768  | 0.01 | 23.0%  |
| Dchs1    | 5.698976    | 0.43 | 7.6%   |
| Dci      | 2.741644    | 0.25 | 9.2%   |
| Dck      | 11.4726     | 0.63 | 5.5%   |
| Dclk1    | 53.44396    | 7.72 | 14.5%  |
| Dclk2    | 19.91318    | 1.44 | 7.2%   |
| Dclk3    | 0.6060646   | 0.10 | 16.9%  |
| Dclre1a  | 2.424946    | 0.10 | 4.1%   |
| Dclre1b  | 1.389164    | 0.35 | 25.3%  |
| Dclre1c  | 1.816728    | 0.20 | 11.0%  |
| Dcn      | 24.7473     | 5.55 | 22.4%  |
| Dcp1a    | 3.214836    | 0.08 | 2.6%   |
| Dcp1b    | 2.711508    | 0.27 | 10.0%  |
| Dcp2     | 6.890794    | 0.62 | 9.0%   |
| Dcpp1    | 0.05131084  | 0.04 | 69.3%  |
| Dcpp2    | 0.00917606  | 0.02 | 223.6% |
| Dcpp3    | 0           | 0.00 |        |
| Dcps     | 6.526948    | 0.80 | 12.3%  |
| Dcst1    | 0.14803236  | 0.04 | 28.1%  |
| Dct      | 0.00245736  | 0.01 | 223.6% |
| Dctd     | 0.5173682   | 0.08 | 15.2%  |
| Dctn1    | 73.17372    | 2.41 | 3.3%   |
| Dctn2    | 108.514     | 3.61 | 3.3%   |
| Dctn3    | 49.49366    | 4.47 | 9.0%   |
| Dctn4    | 45.73288    | 0.51 | 1.1%   |
| Dctn5    | 28.51828    | 2.07 | 7.3%   |
| Dctn6    | 32.79602    | 1.80 | 5.5%   |
| Dcun1d1  | 8.198588    | 0.31 | 3.8%   |
| Dcun1d2  | 10.709076   | 1.23 | 11.5%  |
| Dcun1d3  | 3.040368    | 0.34 | 11.3%  |
| Dcun1d4  | 65.0248     | 0.95 | 1.5%   |
| Dcun1d5  | 18.35106    | 1.57 | 8.5%   |
| Dcx      | 6.850248    | 1.45 | 21.2%  |
| Dcxr     | 4.085712    | 0.27 | 6.7%   |
| DD413430 | 0           | 0.00 |        |
| DD57     | 0.142210558 | 0.16 | 114.6% |
| Ddah1    | 18.58254    | 1.09 | 5.9%   |
| Ddah2    | 8.679004    | 1.42 | 16.4%  |
| Ddb1     | 102.64066   | 2.62 | 2.6%   |
| Ddb2     | 3.909956    | 0.53 | 13.5%  |
| Ddc      | 0.06187126  | 0.04 | 59.9%  |
| Ddc8     | 0.0047385   | 0.01 | 223.6% |



|        |            |       |       |
|--------|------------|-------|-------|
| Ddef1  | 38.289     | 1.21  | 3.2%  |
| Ddef2  | 12.29164   | 1.89  | 15.4% |
| Ddef11 | 0.698565   | 0.11  | 15.9% |
| Ddhd1  | 12.22514   | 0.51  | 4.2%  |
| Ddhd2  | 14.1982    | 0.79  | 5.5%  |
| Ddi1   | 0          | 0.00  |       |
| Ddi2   | 7.255414   | 0.48  | 6.6%  |
| Ddip   | 0.09427232 | 0.04  | 40.6% |
| Ddit3  | 32.64068   | 3.46  | 10.6% |
| Ddit4  | 23.22402   | 1.88  | 8.1%  |
| Ddit4l | 0.7721408  | 0.09  | 12.1% |
| DDM36  | 0.2383888  | 0.13  | 53.1% |
| Ddn    | 3.67071    | 0.25  | 6.7%  |
| Ddo    | 0.1906094  | 0.04  | 22.4% |
| DDO    | 0.01674432 | 0.00  | 8.2%  |
| Ddost  | 41.07624   | 3.71  | 9.0%  |
| Ddp2   | 0.1711312  | 0.07  | 41.4% |
| Ddr1   | 8.125668   | 0.57  | 7.0%  |
| Ddr2   | 2.602924   | 0.48  | 18.5% |
| Ddt    | 19.5134    | 1.33  | 6.8%  |
| Ddx1   | 59.45346   | 2.19  | 3.7%  |
| Ddx10  | 6.510022   | 0.43  | 6.6%  |
| Ddx11  | 0.4706402  | 0.06  | 12.4% |
| Ddx17  | 139.7746   | 14.54 | 10.4% |
| Ddx18  | 0.7996656  | 0.10  | 11.9% |
| Ddx19a | 5.61588    | 0.28  | 5.0%  |
| Ddx19b | 10.184632  | 0.35  | 3.4%  |
| Ddx20  | 3.448622   | 0.19  | 5.5%  |
| Ddx21  | 5.05719    | 0.20  | 3.9%  |
| Ddx23  | 21.97344   | 0.65  | 2.9%  |
| Ddx24  | 61.52582   | 1.04  | 1.7%  |
| Ddx25  | 26.80082   | 1.28  | 4.8%  |
| Ddx26b | 9.715364   | 1.06  | 10.9% |
| Ddx27  | 10.07149   | 0.78  | 7.8%  |
| Ddx28  | 5.814866   | 0.56  | 9.6%  |
| Ddx31  | 1.787116   | 0.10  | 5.8%  |
| Ddx39  | 7.176652   | 0.51  | 7.1%  |
| Ddx3x  | 59.30226   | 1.14  | 1.9%  |
| Ddx3y  | 0.06827734 | 0.01  | 19.3% |
| Ddx4   | 0.6034426  | 0.10  | 16.3% |
| Ddx41  | 8.954372   | 0.48  | 5.4%  |
| Ddx42  | 21.46934   | 1.15  | 5.4%  |
| Ddx46  | 10.13296   | 0.39  | 3.9%  |
| Ddx47  | 18.14854   | 0.74  | 4.1%  |
| Ddx49  | 7.27311    | 0.64  | 8.9%  |
| Ddx5   | 157.5008   | 5.56  | 3.5%  |
| Ddx50  | 9.637696   | 0.43  | 4.5%  |

|          |            |      |       |
|----------|------------|------|-------|
| Ddx51    | 2.70561    | 0.17 | 6.2%  |
| Ddx52    | 5.068704   | 0.39 | 7.7%  |
| Ddx54    | 9.85791    | 0.90 | 9.1%  |
| Ddx55    | 4.698132   | 0.26 | 5.6%  |
| Ddx56    | 11.8785    | 0.73 | 6.2%  |
| Ddx58    | 0.8337222  | 0.06 | 7.7%  |
| Ddx59    | 3.275038   | 0.17 | 5.2%  |
| Ddx6     | 29.501     | 2.02 | 6.8%  |
| Deadc1   | 3.297896   | 0.28 | 8.5%  |
| Deaf1    | 42.62854   | 3.83 | 9.0%  |
| Dear1    | 0.14028618 | 0.11 | 81.2% |
| Deb1     | 27.21196   | 0.76 | 2.8%  |
| Decr1    | 1.464746   | 0.14 | 9.4%  |
| Decr2    | 7.750026   | 0.26 | 3.4%  |
| Dectin-1 | 0          | 0.00 |       |
| Dedd     | 12.02328   | 0.32 | 2.7%  |
| Dedd2    | 3.47141    | 0.36 | 10.2% |
| Def6     | 0.5820946  | 0.08 | 13.7% |
| Def8     | 27.10716   | 0.96 | 3.6%  |
| Defb1    | 0.045358   | 0.03 | 71.6% |
| Defb10   | 0          | 0.00 |       |
| Defb11   | 0          | 0.00 |       |
| Defb12   | 0          | 0.00 |       |
| Defb13   | 0          | 0.00 |       |
| Defb14   | 0          | 0.00 |       |
| Defb15   | 0          | 0.00 |       |
| Defb18   | 0          | 0.00 |       |
| Defb19   | 0          | 0.00 |       |
| Defb2    | 0.06581098 | 0.06 | 93.2% |
| Defb20   | 0          | 0.00 |       |
| Defb21   | 0          | 0.00 |       |
| Defb22   | 0          | 0.00 |       |
| Defb23   | 0          | 0.00 |       |
| Defb25   | 0          | 0.00 |       |
| Defb26   | 0          | 0.00 |       |
| Defb28   | 0          | 0.00 |       |
| Defb29   | 0          | 0.00 |       |
| Defb3    | 0          | 0.00 |       |
| Defb30   | 0          | 0.00 |       |
| Defb34   | 0          | 0.00 |       |
| Defb35   | 0          | 0.00 |       |
| Defb36   | 0          | 0.00 |       |
| Defb37   | 0          | 0.00 |       |
| Defb38   | 0          | 0.00 |       |
| Defb39   | 0          | 0.00 |       |
| Defb4    | 0          | 0.00 |       |
| Defb40   | 0          | 0.00 |       |

|           |            |      |        |
|-----------|------------|------|--------|
| Defb41    | 0          | 0.00 |        |
| Defb42    | 0          | 0.00 |        |
| Defb43    | 0          | 0.00 |        |
| Defb46-ps | 0          | 0.00 |        |
| Defb48-ps | 0          | 0.00 |        |
| Defb49    | 0.0345848  | 0.08 | 223.6% |
| Defb5     | 0          | 0.00 |        |
| Defb50    | 0          | 0.00 |        |
| Defb54-ps | 0          | 0.00 |        |
| Defb6     | 0          | 0.00 |        |
| Defb7     | 0          | 0.00 |        |
| Defb8     | 0          | 0.00 |        |
| Defb9     | 0          | 0.00 |        |
| Defcr20   | 0          | 0.00 |        |
| Defcr21   | 0          | 0.00 |        |
| Defcr22   | 0          | 0.00 |        |
| Defcr23   | 0.01738672 | 0.04 | 223.6% |
| Defcr26   | 0          | 0.00 |        |
| Defcr3    | 0          | 0.00 |        |
| Defcr4    | 0          | 0.00 |        |
| Defcr5    | 0          | 0.00 |        |
| Defcr6    | 0.03788842 | 0.05 | 137.3% |
| Defcr-rs1 | 0.05599626 | 0.08 | 138.6% |
| Degs1     | 48.05922   | 1.59 | 3.3%   |
| Degs2     | 0.12705772 | 0.10 | 79.0%  |
| Dek       | 11.42636   | 0.50 | 4.4%   |
| Del1      | 0.12698224 | 0.09 | 69.9%  |
| Deltex3   | 4.583644   | 0.46 | 9.9%   |
| Dennd1a   | 9.053816   | 0.29 | 3.2%   |
| Dennd1b   | 2.17451    | 0.40 | 18.3%  |
| Dennd1c   | 0.02641896 | 0.02 | 79.4%  |
| Dennd2a   | 3.451766   | 0.23 | 6.8%   |
| Dennd2c   | 0.4656774  | 0.05 | 11.1%  |
| Dennd2d   | 0.0843154  | 0.06 | 70.0%  |
| Dennd3    | 0.6937048  | 0.09 | 12.9%  |
| Dennd4b   | 8.65737    | 0.40 | 4.6%   |
| Dennd4c   | 1.3424     | 0.18 | 13.5%  |
| Denr      | 26.38898   | 2.15 | 8.1%   |
| Depdc1a   | 0.0577479  | 0.04 | 65.0%  |
| Depdc1b   | 0.2054702  | 0.06 | 29.4%  |
| Depdc2    | 0.9768836  | 0.16 | 16.3%  |
| Depdc5    | 8.531148   | 0.59 | 6.9%   |
| Depdc6    | 1.82411    | 0.28 | 15.5%  |
| Depdc7    | 0.3841596  | 0.10 | 26.3%  |
| Dera      | 2.712826   | 0.44 | 16.3%  |
| Derl1     | 24.62456   | 1.34 | 5.5%   |
| Derl2     | 12.41686   | 0.77 | 6.2%   |

|         |            |      |        |
|---------|------------|------|--------|
| Derl3   | 4.760386   | 0.93 | 19.6%  |
| Des     | 0.00530678 | 0.01 | 138.1% |
| Det1    | 1.628004   | 0.15 | 9.1%   |
| Dexi    | 7.72275    | 1.01 | 13.0%  |
| Dffa    | 10.716306  | 1.05 | 9.8%   |
| Dffb    | 2.102286   | 0.26 | 12.5%  |
| Dfna5h  | 4.06545    | 0.20 | 4.9%   |
| Dfnb59  | 0.20007584 | 0.07 | 36.8%  |
| Dgat    | 5.053456   | 0.40 | 7.9%   |
| Dgat1   | 11.5549    | 1.54 | 13.3%  |
| Dgat2   | 9.328528   | 0.47 | 5.0%   |
| Dgat2l3 | 0          | 0.00 |        |
| Dgat2l4 | 0.03360854 | 0.03 | 85.2%  |
| Dgcr2   | 45.14858   | 1.26 | 2.8%   |
| Dgcr6   | 20.7155    | 2.81 | 13.6%  |
| Dgcr8   | 6.755958   | 0.38 | 5.6%   |
| Dgka    | 0.9686358  | 0.06 | 5.9%   |
| Dgkb    | 10.85808   | 0.63 | 5.8%   |
| Dgkd    | 14.3964    | 2.62 | 18.2%  |
| Dgke    | 10.026336  | 0.33 | 3.3%   |
| Dgkg    | 2.77646    | 0.44 | 16.0%  |
| Dgkh    | 1.376976   | 0.22 | 15.7%  |
| Dgki    | 2.059896   | 0.70 | 34.1%  |
| Dgkk    | 26.71832   | 1.04 | 3.9%   |
| Dgkq    | 15.79598   | 2.39 | 15.1%  |
| Dgkz    | 22.89576   | 1.00 | 4.4%   |
| Dguok   | 6.291222   | 0.50 | 8.0%   |
| Dhcr24  | 59.70556   | 8.87 | 14.9%  |
| Dhcr7   | 28.62282   | 3.18 | 11.1%  |
| Dhdds   | 21.73908   | 0.60 | 2.8%   |
| Dhdh    | 0.4336736  | 0.08 | 19.1%  |
| Dhfr    | 0.6295634  | 0.07 | 10.7%  |
| Dhh     | 0.01770708 | 0.01 | 51.4%  |
| Dhodh   | 4.445818   | 0.22 | 4.8%   |
| Dhps    | 19.37052   | 1.47 | 7.6%   |
| Dhrs1   | 17.99342   | 0.89 | 4.9%   |
| Dhrs13  | 12.30264   | 1.11 | 9.0%   |
| Dhrs2   | 0.0506506  | 0.03 | 50.9%  |
| Dhrs3   | 1.364784   | 0.20 | 14.6%  |
| Dhrs4   | 1.727082   | 0.13 | 7.5%   |
| Dhrs7   | 6.514988   | 1.01 | 15.6%  |
| Dhrs7b  | 10.28915   | 1.19 | 11.6%  |
| Dhrs7c  | 0          | 0.00 |        |
| Dhrs9   | 0.00463358 | 0.01 | 137.3% |
| Dhrsx   | 0          | 0.00 |        |
| Dhtkd1  | 1.417104   | 0.23 | 16.3%  |
| Dhx15   | 27.20844   | 0.82 | 3.0%   |

|        |            |      |        |
|--------|------------|------|--------|
| Dhx16  | 5.113486   | 0.25 | 5.0%   |
| Dhx29  | 6.022178   | 0.73 | 12.2%  |
| Dhx30  | 25.78256   | 0.58 | 2.2%   |
| Dhx32  | 7.7941     | 0.68 | 8.8%   |
| Dhx33  | 3.847822   | 0.27 | 7.0%   |
| Dhx34  | 2.62505    | 0.12 | 4.5%   |
| Dhx35  | 4.850418   | 0.19 | 3.8%   |
| Dhx36  | 30.05      | 1.00 | 3.3%   |
| Dhx37  | 3.48865    | 0.38 | 10.8%  |
| Dhx38  | 6.99445    | 0.41 | 5.9%   |
| Dhx40  | 6.494176   | 0.28 | 4.3%   |
| Dhx57  | 20.84428   | 1.42 | 6.8%   |
| Dhx58  | 0.1963776  | 0.07 | 33.4%  |
| Dhx8   | 8.607676   | 0.21 | 2.5%   |
| Dhx9   | 48.1314    | 2.06 | 4.3%   |
| Dia2   | 0.3027146  | 0.15 | 49.8%  |
| Diablo | 7.850582   | 0.51 | 6.4%   |
| Diap1  | 6.162974   | 0.29 | 4.7%   |
| Diap2  | 1.61694    | 0.34 | 21.3%  |
| Diap3  | 0.3935488  | 0.06 | 14.5%  |
| Dicer1 | 7.348612   | 0.30 | 4.1%   |
| Dido1  | 10.01055   | 0.51 | 5.1%   |
| DIF-3  | 0.532667   | 0.13 | 25.1%  |
| Dimt1  | 0.7631392  | 0.16 | 21.2%  |
| Dinb1  | 0.5701452  | 0.13 | 22.6%  |
| Dio1   | 0          | 0.00 |        |
| Dio-1  | 0.03191818 | 0.04 | 114.3% |
| Dio2   | 0.05096306 | 0.01 | 25.4%  |
| Dio3   | 0.2965282  | 0.06 | 20.6%  |
| Dip2a  | 10.96324   | 0.21 | 1.9%   |
| Dip2b  | 2.63559    | 0.78 | 29.7%  |
| Dip2c  | 20.41928   | 0.59 | 2.9%   |
| Diras1 | 56.29508   | 1.71 | 3.0%   |
| Diras2 | 19.566     | 1.72 | 8.8%   |
| Dirc2  | 13.53898   | 0.23 | 1.7%   |
| Dis3   | 5.669058   | 0.58 | 10.2%  |
| Dis3l  | 7.626114   | 0.36 | 4.7%   |
| Dis3l2 | 8.257144   | 0.30 | 3.6%   |
| Disc1  | 0          | 0.00 |        |
| Disp1  | 0          | 0.00 |        |
| Disp2  | 91.18888   | 7.90 | 8.7%   |
| Diws1t | 0.57213718 | 0.51 | 88.5%  |
| Dixdc1 | 9.843694   | 0.63 | 6.4%   |
| Dkc1   | 5.59409    | 0.33 | 5.8%   |
| Dkk1   | 0.1910644  | 0.06 | 32.6%  |
| Dkk2   | 0.2680466  | 0.09 | 34.5%  |
| Dkk3   | 1.440308   | 0.22 | 15.4%  |

|        |             |       |        |
|--------|-------------|-------|--------|
| Dkk-3  | 0.2342656   | 0.21  | 89.7%  |
| Dkk4   | 0.00437516  | 0.01  | 223.6% |
| Dkk11  | 0.01291876  | 0.02  | 138.8% |
| Dlat   | 48.13406    | 1.33  | 2.8%   |
| Dlc1   | 4.690926    | 0.28  | 6.0%   |
| Dld    | 70.50652    | 1.43  | 2.0%   |
| Dlec1  | 0.13538376  | 0.05  | 35.0%  |
| Dleu7  | 1.711182    | 0.24  | 14.1%  |
| Dlg1   | 8.042396    | 0.41  | 5.1%   |
| Dlg2   | 34.96596    | 0.89  | 2.5%   |
| Dlg3   | 19.06188    | 0.97  | 5.1%   |
| Dlg4   | 80.0291     | 3.83  | 4.8%   |
| Dlg5   | 6.157606    | 0.16  | 2.6%   |
| Dlg7   | 0.3777596   | 0.10  | 26.1%  |
| Dlgap1 | 18.3263     | 1.08  | 5.9%   |
| Dlgap2 | 2.684692    | 0.16  | 6.1%   |
| Dlgap3 | 20.97352    | 1.84  | 8.8%   |
| Dlgap4 | 24.38998    | 1.79  | 7.3%   |
| Dlgh3  | 0.209464    | 0.06  | 27.8%  |
| Dlk1   | 149.48562   | 48.72 | 32.6%  |
| Dlk2   | 7.955772    | 0.64  | 8.0%   |
| Dll1   | 2.053648    | 0.16  | 7.7%   |
| Dll3   | 0.816112    | 0.07  | 8.9%   |
| Dll4   | 0.089043058 | 0.06  | 72.0%  |
| Dlst   | 64.12228    | 2.70  | 4.2%   |
| Dlx1   | 0.030271342 | 0.02  | 50.3%  |
| Dlx2   | 0.01597484  | 0.01  | 73.4%  |
| Dlx3   | 0.028187106 | 0.02  | 79.9%  |
| Dlx4   | 0.1743054   | 0.01  | 8.2%   |
| Dlx5   | 0.0545219   | 0.05  | 98.5%  |
| Dlx6   | 0.02233954  | 0.02  | 102.6% |
| Dmap1  | 10.68928    | 0.54  | 5.1%   |
| Dmbt1  | 0.3566128   | 0.23  | 63.7%  |
| Dmbx1  | 0.08452124  | 0.02  | 23.7%  |
| Dmc1   | 0.10911844  | 0.01  | 11.0%  |
| Dmd    | 6.8603      | 0.36  | 5.3%   |
| Dmgdh  | 0.02983434  | 0.02  | 55.3%  |
| Dmkn   | 0.04114818  | 0.03  | 78.1%  |
| Dmn    | 3.534092    | 0.28  | 8.0%   |
| Dmp1   | 0.1473795   | 0.04  | 30.4%  |
| Dmpk   | 1.914822    | 0.39  | 20.1%  |
| Dmrt1  | 0.00440284  | 0.01  | 223.6% |
| Dmrt2  | 0.469259    | 0.07  | 15.1%  |
| Dmrt3  | 0.2477082   | 0.05  | 20.1%  |
| Dmrta1 | 0.049471    | 0.01  | 21.3%  |
| Dmrta2 | 0.3084936   | 0.06  | 19.4%  |
| Dmrta1 | 0.6570782   | 0.11  | 16.8%  |

|         |             |      |        |
|---------|-------------|------|--------|
| Dmrtc1a | 0.7593258   | 0.23 | 29.8%  |
| Dmrtc1b | 0           | 0.00 |        |
| Dmrtc1c | 0           | 0.00 |        |
| Dmrtc2  | 0.01848308  | 0.02 | 105.1% |
| Dmtf1   | 14.856      | 1.09 | 7.3%   |
| Dmwd    | 36.91992    | 1.46 | 4.0%   |
| Dmxl1   | 6.133188    | 0.52 | 8.4%   |
| Dmxl2   | 69.04356    | 2.72 | 3.9%   |
| Dna2l   | 0.371487    | 0.10 | 27.4%  |
| Dnahc1  | 0.03810544  | 0.06 | 144.5% |
| Dnahc11 | 0.02119274  | 0.01 | 23.7%  |
| Dnahc12 | 0.00582974  | 0.01 | 223.6% |
| Dnahc17 | 0           | 0.00 |        |
| Dnahc2  | 0.1164588   | 0.02 | 15.3%  |
| Dnahc3  | 0.038109122 | 0.02 | 48.6%  |
| Dnahc5  | 0.02374198  | 0.00 | 20.0%  |
| Dnahc6  | 0.0311942   | 0.04 | 143.4% |
| Dnahc8  | 0.038135286 | 0.03 | 81.9%  |
| Dnahc9  | 0.4260614   | 0.15 | 35.8%  |
| Dnaic1  | 0.13217378  | 0.04 | 30.5%  |
| Dnaic2  | 0.1434874   | 0.03 | 23.3%  |
| Dnaja1  | 24.2479     | 1.29 | 5.3%   |
| Dnaja2  | 51.56366    | 2.13 | 4.1%   |
| Dnaja3  | 28.4837     | 0.96 | 3.4%   |
| Dnaja4  | 3.130512    | 0.23 | 7.3%   |
| Dnajb1  | 20.68634    | 1.79 | 8.6%   |
| Dnajb10 | 40.8265     | 1.18 | 2.9%   |
| Dnajb11 | 25.12542    | 2.38 | 9.5%   |
| Dnajb12 | 9.775952    | 0.86 | 8.8%   |
| Dnajb13 | 0.0048707   | 0.01 | 223.6% |
| Dnajb14 | 9.721786    | 1.20 | 12.3%  |
| Dnajb3  | 0.778383    | 0.29 | 37.9%  |
| Dnajb4  | 23.6754     | 0.57 | 2.4%   |
| Dnajb5  | 12.66502    | 0.96 | 7.6%   |
| Dnajb6  | 7.457614    | 0.65 | 8.7%   |
| Dnajb7  | 0.00585034  | 0.01 | 223.6% |
| Dnajb8  | 0           | 0.00 |        |
| Dnajb9  | 27.97914    | 1.60 | 5.7%   |
| Dnajc1  | 2.495384    | 0.45 | 17.9%  |
| Dnajc10 | 26.46646    | 1.07 | 4.1%   |
| Dnajc11 | 23.51158    | 1.02 | 4.3%   |
| Dnajc12 | 8.385974    | 0.54 | 6.5%   |
| Dnajc13 | 10.143266   | 0.35 | 3.5%   |
| Dnajc14 | 11.69016    | 0.20 | 1.7%   |
| Dnajc15 | 21.68466    | 0.65 | 3.0%   |
| Dnajc16 | 7.451506    | 0.41 | 5.5%   |
| Dnajc17 | 1.274668    | 0.06 | 4.6%   |

|                 |             |       |        |
|-----------------|-------------|-------|--------|
| Dnajc18         | 22.09326    | 1.34  | 6.1%   |
| Dnajc19         | 1.515224    | 0.18  | 11.9%  |
| Dnajc2          | 8.689336    | 0.86  | 9.9%   |
| Dnajc3a         | 32.6304     | 2.56  | 7.8%   |
| Dnajc4          | 10.430958   | 0.89  | 8.5%   |
| Dnajc5          | 126.6454    | 2.83  | 2.2%   |
| Dnajc5b         | 0           | 0.00  |        |
| Dnajc5g         | 0           | 0.00  |        |
| Dnajc6          | 65.62606    | 2.59  | 3.9%   |
| Dnajc7          | 51.34082    | 2.38  | 4.6%   |
| Dnajc8          | 25.77514    | 1.87  | 7.2%   |
| Dnajc9          | 11.480578   | 1.20  | 10.5%  |
| Dnalc1          | 5.695548    | 0.51  | 9.0%   |
| Dnalc4          | 7.147322    | 0.30  | 4.1%   |
| Dnali1          | 0.06988472  | 0.03  | 41.2%  |
| dnam-1          | 0.013228226 | 0.01  | 76.2%  |
| DNA-PKcs(Prkds) | 1.2380186   | 0.41  | 33.4%  |
| Dnase1          | 1.528986    | 0.41  | 26.9%  |
| Dnase1l1        | 0.4037108   | 0.10  | 25.0%  |
| Dnase1l2        | 1.548448    | 0.30  | 19.5%  |
| Dnase1l3        | 0.00340089  | 0.00  | 137.7% |
| Dnase2a         | 2.238754    | 0.34  | 15.3%  |
| Dnase2b         | 0           | 0.00  |        |
| Dnchc2          | 0.3459022   | 0.17  | 48.2%  |
| Dncic2          | 0.10732116  | 0.05  | 47.1%  |
| Dnd1            | 1.5604138   | 1.26  | 81.0%  |
| Dner            | 84.36296    | 3.30  | 3.9%   |
| Dnm1            | 210.0424    | 10.67 | 5.1%   |
| Dnm1l           | 77.55308    | 2.41  | 3.1%   |
| Dnm2            | 7.56679     | 0.37  | 4.9%   |
| Dnm3            | 35.52348    | 3.41  | 9.6%   |
| Dnm3os          | 1.0405074   | 0.17  | 16.4%  |
| Dnmbp           | 1.98089     | 0.05  | 2.3%   |
| Dnmt1           | 12.11744    | 0.66  | 5.4%   |
| Dnmt3a          | 39.63626    | 1.08  | 2.7%   |
| Dnmt3b          | 0.1573259   | 0.07  | 44.6%  |
| Dnmt3l          | 0.13153156  | 0.07  | 56.7%  |
| Dnpep           | 13.69632    | 1.13  | 8.3%   |
| Dnt2            | 0.1931016   | 0.05  | 27.6%  |
| Dntt            | 0           | 0.00  |        |
| Dnttip1         | 7.908406    | 0.69  | 8.7%   |
| Dnttip2         | 7.667014    | 0.41  | 5.4%   |
| Doc2a           | 4.198888    | 0.45  | 10.7%  |
| Doc2b           | 1.300732    | 0.09  | 6.8%   |
| Doc2g           | 2.425442    | 0.41  | 16.8%  |
| Dock1           | 2.024178    | 0.18  | 9.0%   |
| Dock10          | 0.8096472   | 0.48  | 58.7%  |



|         |             |      |        |
|---------|-------------|------|--------|
| Dock11  | 3.972818    | 0.20 | 5.1%   |
| Dock2   | 0.012132352 | 0.01 | 79.5%  |
| Dock3   | 15.8101     | 0.64 | 4.1%   |
| Dock4   | 7.538368    | 0.65 | 8.6%   |
| Dock5   | 0.3384208   | 0.04 | 11.0%  |
| Dock6   | 2.211794    | 0.41 | 18.6%  |
| Dock7   | 7.701744    | 0.39 | 5.1%   |
| Dock8   | 0.0841992   | 0.04 | 50.2%  |
| Dock9   | 7.158796    | 0.28 | 3.9%   |
| Dohh    | 27.73548    | 1.76 | 6.3%   |
| Dok1    | 0.2283468   | 0.04 | 17.3%  |
| Dok2    | 0.237538    | 0.04 | 15.2%  |
| Dok3    | 1.216331    | 0.18 | 15.1%  |
| Dok4    | 6.498988    | 0.35 | 5.5%   |
| Dok5    | 13.80264    | 1.30 | 9.4%   |
| Dok6    | 12.044582   | 1.79 | 14.8%  |
| Dok7    | 2.233508    | 0.22 | 9.6%   |
| DOKist4 | 3.632624    | 0.66 | 18.1%  |
| Dolk    | 15.72696    | 1.36 | 8.6%   |
| Dolpp1  | 10.432732   | 0.47 | 4.5%   |
| Dom3z   | 3.30778     | 0.17 | 5.1%   |
| Donson  | 6.262498    | 0.28 | 4.4%   |
| Dopey1  | 9.408524    | 0.54 | 5.8%   |
| Dopey2  | 13.62892    | 1.23 | 9.0%   |
| Dorz1   | 0.6805062   | 0.27 | 40.2%  |
| Dos     | 122.8334    | 6.60 | 5.4%   |
| Dot1    | 1.788722    | 0.23 | 12.9%  |
| Dot1l   | 4.71339     | 0.24 | 5.1%   |
| Doxl2   | 0           | 0.00 |        |
| Dpagt1  | 9.57625     | 0.24 | 2.5%   |
| Dpcr1   | 0.6171242   | 0.26 | 41.8%  |
| Dpep1   | 0.7133238   | 0.37 | 51.4%  |
| Dpep2   | 0.01529536  | 0.02 | 111.2% |
| Dpep3   | 0           | 0.00 |        |
| Dpf2    | 15.30322    | 0.76 | 5.0%   |
| Dpf3    | 0.2293998   | 0.05 | 22.8%  |
| Dph1    | 3.187564    | 0.16 | 4.9%   |
| Dph2    | 2.649308    | 0.29 | 11.0%  |
| Dph3    | 8.990424    | 0.80 | 8.9%   |
| Dph4    | 2.425294    | 0.35 | 14.5%  |
| Dph5    | 4.53685     | 0.33 | 7.2%   |
| Dpm1    | 8.71867     | 0.61 | 7.0%   |
| Dpm2    | 25.60264    | 1.86 | 7.3%   |
| Dpm3    | 12.61538    | 1.35 | 10.7%  |
| Dpp10   | 30.96404    | 1.00 | 3.2%   |
| Dpp3    | 31.31462    | 1.48 | 4.7%   |
| Dpp4    | 0.5682906   | 0.19 | 32.8%  |

|          |            |         |        |
|----------|------------|---------|--------|
| Dpp6     | 75.9521    | 4.24    | 5.6%   |
| Dpp7     | 4.658198   | 0.26    | 5.6%   |
| Dpp8     | 34.38692   | 2.25    | 6.5%   |
| Dpp9     | 17.60576   | 0.98    | 5.6%   |
| Dppa1    | 0          | 0.00    |        |
| Dppa2    | 0.00333276 | 0.01    | 223.6% |
| Dppa3    | 0          | 0.00    |        |
| Dppa4    | 0          | 0.00    |        |
| Dppa5    | 0.0452832  | 0.06    | 137.3% |
| Dpt      | 0.2730634  | 0.13    | 48.1%  |
| Dpy1911  | 14.42088   | 0.36    | 2.5%   |
| Dpy1913  | 4.427018   | 0.46    | 10.4%  |
| Dpy1914  | 5.580338   | 0.64    | 11.4%  |
| Dpyd     | 0.9976558  | 0.18    | 17.7%  |
| Dpys     | 0.01699006 | 0.02    | 93.4%  |
| Dpysl2   | 118.387    | 14.45   | 12.2%  |
| Dpysl3   | 108.47486  | 14.72   | 13.6%  |
| Dpysl4   | 28.91092   | 2.55    | 8.8%   |
| Dpysl5   | 67.52734   | 8.89    | 13.2%  |
| DQ059756 | 0          | 0.00    |        |
| DQ072380 | 0.11594006 | 0.03    | 28.5%  |
| DQ072382 | 0.1276174  | 0.04    | 32.4%  |
| DQ072386 | 56.62878   | 5.95    | 10.5%  |
| DQ072390 | 5.895552   | 0.53    | 9.0%   |
| DQ266428 | 1.3757616  | 0.39    | 28.2%  |
| DQ279480 | 0          | 0.00    |        |
| DQ284430 | 0          | 0.00    |        |
| DQ354407 | 0.0267022  | 0.02    | 68.8%  |
| DQ539905 | 0          | 0.00    |        |
| DQ539915 | 7272.806   | 1117.58 | 15.4%  |
| DQ539956 | 0          | 0.00    |        |
| DQ539985 | 0          | 0.00    |        |
| DQ539992 | 0          | 0.00    |        |
| DQ539999 | 0          | 0.00    |        |
| DQ540009 | 0          | 0.00    |        |
| DQ540032 | 0          | 0.00    |        |
| DQ540050 | 0          | 0.00    |        |
| DQ540060 | 0          | 0.00    |        |
| DQ540096 | 0          | 0.00    |        |
| DQ540135 | 0          | 0.00    |        |
| DQ540160 | 0          | 0.00    |        |
| DQ540165 | 0          | 0.00    |        |
| DQ540208 | 0          | 0.00    |        |
| DQ540256 | 0          | 0.00    |        |
| DQ540266 | 0          | 0.00    |        |
| DQ540318 | 0          | 0.00    |        |
| DQ540346 | 0          | 0.00    |        |

|          |   |      |  |
|----------|---|------|--|
| DQ540358 | 0 | 0.00 |  |
| DQ540360 | 0 | 0.00 |  |
| DQ540388 | 0 | 0.00 |  |
| DQ540432 | 0 | 0.00 |  |
| DQ540451 | 0 | 0.00 |  |
| DQ540490 | 0 | 0.00 |  |
| DQ540523 | 0 | 0.00 |  |
| DQ540525 | 0 | 0.00 |  |
| DQ540543 | 0 | 0.00 |  |
| DQ540574 | 0 | 0.00 |  |
| DQ540576 | 0 | 0.00 |  |
| DQ540649 | 0 | 0.00 |  |
| DQ540688 | 0 | 0.00 |  |
| DQ540690 | 0 | 0.00 |  |
| DQ540716 | 0 | 0.00 |  |
| DQ540739 | 0 | 0.00 |  |
| DQ540775 | 0 | 0.00 |  |
| DQ540809 | 0 | 0.00 |  |
| DQ540885 | 0 | 0.00 |  |
| DQ540907 | 0 | 0.00 |  |
| DQ540913 | 0 | 0.00 |  |
| DQ540925 | 0 | 0.00 |  |
| DQ540943 | 0 | 0.00 |  |
| DQ540995 | 0 | 0.00 |  |
| DQ541037 | 0 | 0.00 |  |
| DQ541157 | 0 | 0.00 |  |
| DQ541158 | 0 | 0.00 |  |
| DQ541184 | 0 | 0.00 |  |
| DQ541188 | 0 | 0.00 |  |
| DQ541191 | 0 | 0.00 |  |
| DQ541234 | 0 | 0.00 |  |
| DQ541263 | 0 | 0.00 |  |
| DQ541300 | 0 | 0.00 |  |
| DQ541423 | 0 | 0.00 |  |
| DQ541485 | 0 | 0.00 |  |
| DQ541502 | 0 | 0.00 |  |
| DQ541645 | 0 | 0.00 |  |
| DQ541658 | 0 | 0.00 |  |
| DQ541662 | 0 | 0.00 |  |
| DQ541699 | 0 | 0.00 |  |
| DQ541735 | 0 | 0.00 |  |
| DQ541751 | 0 | 0.00 |  |
| DQ541757 | 0 | 0.00 |  |
| DQ541758 | 0 | 0.00 |  |
| DQ541762 | 0 | 0.00 |  |
| DQ541918 | 0 | 0.00 |  |
| DQ541956 | 0 | 0.00 |  |

|          |          |      |        |
|----------|----------|------|--------|
| DQ541958 | 0        | 0.00 |        |
| DQ541975 | 0        | 0.00 |        |
| DQ542007 | 0        | 0.00 |        |
| DQ542029 | 0        | 0.00 |        |
| DQ542042 | 0        | 0.00 |        |
| DQ542114 | 0        | 0.00 |        |
| DQ542172 | 0        | 0.00 |        |
| DQ542181 | 0        | 0.00 |        |
| DQ542236 | 0        | 0.00 |        |
| DQ542264 | 0        | 0.00 |        |
| DQ542302 | 0        | 0.00 |        |
| DQ542332 | 0        | 0.00 |        |
| DQ542353 | 0        | 0.00 |        |
| DQ542380 | 0        | 0.00 |        |
| DQ542393 | 0        | 0.00 |        |
| DQ542397 | 0        | 0.00 |        |
| DQ542547 | 0        | 0.00 |        |
| DQ542586 | 0        | 0.00 |        |
| DQ542656 | 0        | 0.00 |        |
| DQ542709 | 0        | 0.00 |        |
| DQ542726 | 0        | 0.00 |        |
| DQ542751 | 0        | 0.00 |        |
| DQ542758 | 0        | 0.00 |        |
| DQ542762 | 0        | 0.00 |        |
| DQ542813 | 0        | 0.00 |        |
| DQ542896 | 0.171312 | 0.38 | 223.6% |
| DQ542917 | 0        | 0.00 |        |
| DQ542949 | 0        | 0.00 |        |
| DQ542954 | 0        | 0.00 |        |
| DQ542957 | 0        | 0.00 |        |
| DQ542960 | 0        | 0.00 |        |
| DQ543008 | 0        | 0.00 |        |
| DQ543012 | 0        | 0.00 |        |
| DQ543022 | 0        | 0.00 |        |
| DQ543031 | 0        | 0.00 |        |
| DQ543127 | 0        | 0.00 |        |
| DQ543173 | 0        | 0.00 |        |
| DQ543186 | 0        | 0.00 |        |
| DQ543219 | 0        | 0.00 |        |
| DQ543221 | 0        | 0.00 |        |
| DQ543265 | 0        | 0.00 |        |
| DQ543350 | 0        | 0.00 |        |
| DQ543356 | 0        | 0.00 |        |
| DQ543366 | 0        | 0.00 |        |
| DQ543375 | 0        | 0.00 |        |
| DQ543391 | 0        | 0.00 |        |
| DQ543393 | 0        | 0.00 |        |

|          |   |      |  |
|----------|---|------|--|
| DQ543396 | 0 | 0.00 |  |
| DQ543397 | 0 | 0.00 |  |
| DQ543428 | 0 | 0.00 |  |
| DQ543550 | 0 | 0.00 |  |
| DQ543635 | 0 | 0.00 |  |
| DQ543648 | 0 | 0.00 |  |
| DQ543661 | 0 | 0.00 |  |
| DQ543687 | 0 | 0.00 |  |
| DQ543725 | 0 | 0.00 |  |
| DQ543728 | 0 | 0.00 |  |
| DQ543747 | 0 | 0.00 |  |
| DQ543754 | 0 | 0.00 |  |
| DQ543758 | 0 | 0.00 |  |
| DQ543801 | 0 | 0.00 |  |
| DQ543820 | 0 | 0.00 |  |
| DQ543863 | 0 | 0.00 |  |
| DQ543883 | 0 | 0.00 |  |
| DQ543890 | 0 | 0.00 |  |
| DQ544002 | 0 | 0.00 |  |
| DQ544060 | 0 | 0.00 |  |
| DQ544102 | 0 | 0.00 |  |
| DQ544141 | 0 | 0.00 |  |
| DQ544170 | 0 | 0.00 |  |
| DQ544183 | 0 | 0.00 |  |
| DQ544189 | 0 | 0.00 |  |
| DQ544201 | 0 | 0.00 |  |
| DQ544250 | 0 | 0.00 |  |
| DQ544261 | 0 | 0.00 |  |
| DQ544285 | 0 | 0.00 |  |
| DQ544332 | 0 | 0.00 |  |
| DQ544467 | 0 | 0.00 |  |
| DQ544492 | 0 | 0.00 |  |
| DQ544519 | 0 | 0.00 |  |
| DQ544534 | 0 | 0.00 |  |
| DQ544591 | 0 | 0.00 |  |
| DQ544595 | 0 | 0.00 |  |
| DQ544597 | 0 | 0.00 |  |
| DQ544617 | 0 | 0.00 |  |
| DQ544646 | 0 | 0.00 |  |
| DQ544660 | 0 | 0.00 |  |
| DQ544692 | 0 | 0.00 |  |
| DQ544708 | 0 | 0.00 |  |
| DQ544744 | 0 | 0.00 |  |
| DQ544756 | 0 | 0.00 |  |
| DQ544783 | 0 | 0.00 |  |
| DQ544804 | 0 | 0.00 |  |
| DQ544812 | 0 | 0.00 |  |

|          |   |      |  |
|----------|---|------|--|
| DQ544838 | 0 | 0.00 |  |
| DQ544871 | 0 | 0.00 |  |
| DQ544893 | 0 | 0.00 |  |
| DQ544949 | 0 | 0.00 |  |
| DQ545110 | 0 | 0.00 |  |
| DQ545168 | 0 | 0.00 |  |
| DQ545188 | 0 | 0.00 |  |
| DQ545191 | 0 | 0.00 |  |
| DQ545246 | 0 | 0.00 |  |
| DQ545254 | 0 | 0.00 |  |
| DQ545285 | 0 | 0.00 |  |
| DQ545291 | 0 | 0.00 |  |
| DQ545332 | 0 | 0.00 |  |
| DQ545414 | 0 | 0.00 |  |
| DQ545416 | 0 | 0.00 |  |
| DQ545447 | 0 | 0.00 |  |
| DQ545475 | 0 | 0.00 |  |
| DQ545486 | 0 | 0.00 |  |
| DQ545495 | 0 | 0.00 |  |
| DQ545576 | 0 | 0.00 |  |
| DQ545582 | 0 | 0.00 |  |
| DQ545600 | 0 | 0.00 |  |
| DQ545635 | 0 | 0.00 |  |
| DQ545645 | 0 | 0.00 |  |
| DQ545740 | 0 | 0.00 |  |
| DQ545755 | 0 | 0.00 |  |
| DQ545773 | 0 | 0.00 |  |
| DQ545796 | 0 | 0.00 |  |
| DQ545816 | 0 | 0.00 |  |
| DQ545830 | 0 | 0.00 |  |
| DQ545836 | 0 | 0.00 |  |
| DQ545837 | 0 | 0.00 |  |
| DQ545846 | 0 | 0.00 |  |
| DQ545882 | 0 | 0.00 |  |
| DQ545902 | 0 | 0.00 |  |
| DQ545935 | 0 | 0.00 |  |
| DQ545990 | 0 | 0.00 |  |
| DQ546002 | 0 | 0.00 |  |
| DQ546008 | 0 | 0.00 |  |
| DQ546014 | 0 | 0.00 |  |
| DQ546033 | 0 | 0.00 |  |
| DQ546036 | 0 | 0.00 |  |
| DQ546052 | 0 | 0.00 |  |
| DQ546121 | 0 | 0.00 |  |
| DQ546201 | 0 | 0.00 |  |
| DQ546209 | 0 | 0.00 |  |
| DQ546218 | 0 | 0.00 |  |

|          |   |      |  |
|----------|---|------|--|
| DQ546236 | 0 | 0.00 |  |
| DQ546271 | 0 | 0.00 |  |
| DQ546316 | 0 | 0.00 |  |
| DQ546340 | 0 | 0.00 |  |
| DQ546366 | 0 | 0.00 |  |
| DQ546372 | 0 | 0.00 |  |
| DQ546400 | 0 | 0.00 |  |
| DQ546448 | 0 | 0.00 |  |
| DQ546462 | 0 | 0.00 |  |
| DQ546464 | 0 | 0.00 |  |
| DQ546489 | 0 | 0.00 |  |
| DQ546527 | 0 | 0.00 |  |
| DQ546551 | 0 | 0.00 |  |
| DQ546569 | 0 | 0.00 |  |
| DQ546580 | 0 | 0.00 |  |
| DQ546601 | 0 | 0.00 |  |
| DQ546614 | 0 | 0.00 |  |
| DQ546624 | 0 | 0.00 |  |
| DQ546625 | 0 | 0.00 |  |
| DQ546629 | 0 | 0.00 |  |
| DQ546809 | 0 | 0.00 |  |
| DQ546822 | 0 | 0.00 |  |
| DQ546911 | 0 | 0.00 |  |
| DQ546924 | 0 | 0.00 |  |
| DQ547015 | 0 | 0.00 |  |
| DQ547048 | 0 | 0.00 |  |
| DQ547059 | 0 | 0.00 |  |
| DQ547091 | 0 | 0.00 |  |
| DQ547106 | 0 | 0.00 |  |
| DQ547177 | 0 | 0.00 |  |
| DQ547185 | 0 | 0.00 |  |
| DQ547205 | 0 | 0.00 |  |
| DQ547239 | 0 | 0.00 |  |
| DQ547277 | 0 | 0.00 |  |
| DQ547388 | 0 | 0.00 |  |
| DQ547412 | 0 | 0.00 |  |
| DQ547422 | 0 | 0.00 |  |
| DQ547437 | 0 | 0.00 |  |
| DQ547438 | 0 | 0.00 |  |
| DQ547453 | 0 | 0.00 |  |
| DQ547458 | 0 | 0.00 |  |
| DQ547490 | 0 | 0.00 |  |
| DQ547491 | 0 | 0.00 |  |
| DQ547508 | 0 | 0.00 |  |
| DQ547562 | 0 | 0.00 |  |
| DQ547595 | 0 | 0.00 |  |
| DQ547645 | 0 | 0.00 |  |

|          |          |      |      |
|----------|----------|------|------|
| DQ547689 | 0        | 0.00 |      |
| DQ547696 | 0        | 0.00 |      |
| DQ547698 | 0        | 0.00 |      |
| DQ547719 | 0        | 0.00 |      |
| DQ547751 | 0        | 0.00 |      |
| DQ547778 | 0        | 0.00 |      |
| DQ547822 | 0        | 0.00 |      |
| DQ547823 | 0        | 0.00 |      |
| DQ547894 | 0        | 0.00 |      |
| DQ547909 | 0        | 0.00 |      |
| DQ547910 | 0        | 0.00 |      |
| DQ547919 | 0        | 0.00 |      |
| DQ547934 | 0        | 0.00 |      |
| DQ547941 | 0        | 0.00 |      |
| DQ547972 | 0        | 0.00 |      |
| DQ547976 | 0        | 0.00 |      |
| DQ547994 | 0        | 0.00 |      |
| DQ548009 | 0        | 0.00 |      |
| DQ548015 | 0        | 0.00 |      |
| DQ548051 | 0        | 0.00 |      |
| DQ548068 | 0        | 0.00 |      |
| DQ548087 | 0        | 0.00 |      |
| DQ548090 | 0        | 0.00 |      |
| DQ548100 | 0        | 0.00 |      |
| DQ548101 | 0        | 0.00 |      |
| DQ548140 | 0        | 0.00 |      |
| DQ548180 | 0        | 0.00 |      |
| DQ548190 | 0        | 0.00 |      |
| DQ548214 | 0        | 0.00 |      |
| DQ548268 | 0        | 0.00 |      |
| DQ548336 | 0        | 0.00 |      |
| DQ548344 | 0        | 0.00 |      |
| DQ548345 | 0        | 0.00 |      |
| DQ548355 | 0        | 0.00 |      |
| DQ548393 | 0        | 0.00 |      |
| DQ548591 | 0        | 0.00 |      |
| DQ548624 | 0        | 0.00 |      |
| DQ548697 | 0        | 0.00 |      |
| DQ548704 | 0        | 0.00 |      |
| DQ548855 | 0        | 0.00 |      |
| DQ548859 | 0        | 0.00 |      |
| DQ548964 | 0        | 0.00 |      |
| DQ548994 | 6.979926 | 0.55 | 7.9% |
| DQ549025 | 0        | 0.00 |      |
| DQ549026 | 0        | 0.00 |      |
| DQ549082 | 0        | 0.00 |      |
| DQ549109 | 0        | 0.00 |      |



|          |   |      |  |
|----------|---|------|--|
| DQ549139 | 0 | 0.00 |  |
| DQ549194 | 0 | 0.00 |  |
| DQ549198 | 0 | 0.00 |  |
| DQ549212 | 0 | 0.00 |  |
| DQ549220 | 0 | 0.00 |  |
| DQ549221 | 0 | 0.00 |  |
| DQ549223 | 0 | 0.00 |  |
| DQ549229 | 0 | 0.00 |  |
| DQ549248 | 0 | 0.00 |  |
| DQ549253 | 0 | 0.00 |  |
| DQ549285 | 0 | 0.00 |  |
| DQ549294 | 0 | 0.00 |  |
| DQ549305 | 0 | 0.00 |  |
| DQ549323 | 0 | 0.00 |  |
| DQ549365 | 0 | 0.00 |  |
| DQ549375 | 0 | 0.00 |  |
| DQ549406 | 0 | 0.00 |  |
| DQ549471 | 0 | 0.00 |  |
| DQ549481 | 0 | 0.00 |  |
| DQ549511 | 0 | 0.00 |  |
| DQ549545 | 0 | 0.00 |  |
| DQ549561 | 0 | 0.00 |  |
| DQ549573 | 0 | 0.00 |  |
| DQ549577 | 0 | 0.00 |  |
| DQ549578 | 0 | 0.00 |  |
| DQ549582 | 0 | 0.00 |  |
| DQ549597 | 0 | 0.00 |  |
| DQ549608 | 0 | 0.00 |  |
| DQ549625 | 0 | 0.00 |  |
| DQ549643 | 0 | 0.00 |  |
| DQ549647 | 0 | 0.00 |  |
| DQ549692 | 0 | 0.00 |  |
| DQ549709 | 0 | 0.00 |  |
| DQ549711 | 0 | 0.00 |  |
| DQ549720 | 0 | 0.00 |  |
| DQ549732 | 0 | 0.00 |  |
| DQ549737 | 0 | 0.00 |  |
| DQ549743 | 0 | 0.00 |  |
| DQ549744 | 0 | 0.00 |  |
| DQ549792 | 0 | 0.00 |  |
| DQ549875 | 0 | 0.00 |  |
| DQ549901 | 0 | 0.00 |  |
| DQ549908 | 0 | 0.00 |  |
| DQ549935 | 0 | 0.00 |  |
| DQ549940 | 0 | 0.00 |  |
| DQ549963 | 0 | 0.00 |  |
| DQ549971 | 0 | 0.00 |  |

|          |   |      |  |
|----------|---|------|--|
| DQ550004 | 0 | 0.00 |  |
| DQ550042 | 0 | 0.00 |  |
| DQ550048 | 0 | 0.00 |  |
| DQ550093 | 0 | 0.00 |  |
| DQ550104 | 0 | 0.00 |  |
| DQ550209 | 0 | 0.00 |  |
| DQ550222 | 0 | 0.00 |  |
| DQ550225 | 0 | 0.00 |  |
| DQ550247 | 0 | 0.00 |  |
| DQ550253 | 0 | 0.00 |  |
| DQ550256 | 0 | 0.00 |  |
| DQ550274 | 0 | 0.00 |  |
| DQ550326 | 0 | 0.00 |  |
| DQ550364 | 0 | 0.00 |  |
| DQ550368 | 0 | 0.00 |  |
| DQ550371 | 0 | 0.00 |  |
| DQ550390 | 0 | 0.00 |  |
| DQ550407 | 0 | 0.00 |  |
| DQ550425 | 0 | 0.00 |  |
| DQ550471 | 0 | 0.00 |  |
| DQ550484 | 0 | 0.00 |  |
| DQ550513 | 0 | 0.00 |  |
| DQ550549 | 0 | 0.00 |  |
| DQ550564 | 0 | 0.00 |  |
| DQ550594 | 0 | 0.00 |  |
| DQ550606 | 0 | 0.00 |  |
| DQ550639 | 0 | 0.00 |  |
| DQ550653 | 0 | 0.00 |  |
| DQ550686 | 0 | 0.00 |  |
| DQ550701 | 0 | 0.00 |  |
| DQ550788 | 0 | 0.00 |  |
| DQ550824 | 0 | 0.00 |  |
| DQ550843 | 0 | 0.00 |  |
| DQ550871 | 0 | 0.00 |  |
| DQ550879 | 0 | 0.00 |  |
| DQ550935 | 0 | 0.00 |  |
| DQ550973 | 0 | 0.00 |  |
| DQ551000 | 0 | 0.00 |  |
| DQ551003 | 0 | 0.00 |  |
| DQ551006 | 0 | 0.00 |  |
| DQ551012 | 0 | 0.00 |  |
| DQ551037 | 0 | 0.00 |  |
| DQ551069 | 0 | 0.00 |  |
| DQ551097 | 0 | 0.00 |  |
| DQ551102 | 0 | 0.00 |  |
| DQ551105 | 0 | 0.00 |  |
| DQ551112 | 0 | 0.00 |  |

|          |       |      |      |
|----------|-------|------|------|
| DQ551195 | 0     | 0.00 |      |
| DQ551281 | 0     | 0.00 |      |
| DQ551325 | 0     | 0.00 |      |
| DQ551326 | 0     | 0.00 |      |
| DQ551367 | 0     | 0.00 |      |
| DQ551402 | 37.33 | 1.01 | 2.7% |
| DQ551428 | 0     | 0.00 |      |
| DQ551495 | 0     | 0.00 |      |
| DQ551521 | 0     | 0.00 |      |
| DQ551543 | 0     | 0.00 |      |
| DQ551615 | 0     | 0.00 |      |
| DQ551641 | 0     | 0.00 |      |
| DQ551692 | 0     | 0.00 |      |
| DQ551725 | 0     | 0.00 |      |
| DQ551786 | 0     | 0.00 |      |
| DQ551812 | 0     | 0.00 |      |
| DQ551828 | 0     | 0.00 |      |
| DQ551845 | 0     | 0.00 |      |
| DQ551892 | 0     | 0.00 |      |
| DQ552053 | 0     | 0.00 |      |
| DQ552069 | 0     | 0.00 |      |
| DQ552147 | 0     | 0.00 |      |
| DQ552243 | 0     | 0.00 |      |
| DQ552245 | 0     | 0.00 |      |
| DQ552264 | 0     | 0.00 |      |
| DQ552305 | 0     | 0.00 |      |
| DQ552381 | 0     | 0.00 |      |
| DQ552388 | 0     | 0.00 |      |
| DQ552415 | 0     | 0.00 |      |
| DQ552423 | 0     | 0.00 |      |
| DQ552427 | 0     | 0.00 |      |
| DQ552475 | 0     | 0.00 |      |
| DQ552494 | 0     | 0.00 |      |
| DQ552539 | 0     | 0.00 |      |
| DQ552563 | 0     | 0.00 |      |
| DQ552568 | 0     | 0.00 |      |
| DQ552585 | 0     | 0.00 |      |
| DQ552594 | 0     | 0.00 |      |
| DQ552655 | 0     | 0.00 |      |
| DQ552759 | 0     | 0.00 |      |
| DQ552812 | 0     | 0.00 |      |
| DQ552872 | 0     | 0.00 |      |
| DQ552897 | 0     | 0.00 |      |
| DQ552899 | 0     | 0.00 |      |
| DQ552940 | 0     | 0.00 |      |
| DQ552986 | 0     | 0.00 |      |
| DQ552992 | 0     | 0.00 |      |

|          |          |      |      |
|----------|----------|------|------|
| DQ553019 | 0        | 0.00 |      |
| DQ553039 | 0        | 0.00 |      |
| DQ553098 | 0        | 0.00 |      |
| DQ553099 | 0        | 0.00 |      |
| DQ553108 | 0        | 0.00 |      |
| DQ553114 | 0        | 0.00 |      |
| DQ553243 | 0        | 0.00 |      |
| DQ553245 | 4.801712 | 0.41 | 8.6% |
| DQ553248 | 0        | 0.00 |      |
| DQ553291 | 0        | 0.00 |      |
| DQ553300 | 0        | 0.00 |      |
| DQ553325 | 0        | 0.00 |      |
| DQ553341 | 0        | 0.00 |      |
| DQ553350 | 0        | 0.00 |      |
| DQ553376 | 0        | 0.00 |      |
| DQ553419 | 0        | 0.00 |      |
| DQ553449 | 0        | 0.00 |      |
| DQ553469 | 0        | 0.00 |      |
| DQ553502 | 0        | 0.00 |      |
| DQ553514 | 0        | 0.00 |      |
| DQ553546 | 0        | 0.00 |      |
| DQ553547 | 0        | 0.00 |      |
| DQ553550 | 0        | 0.00 |      |
| DQ553589 | 0        | 0.00 |      |
| DQ553595 | 0        | 0.00 |      |
| DQ553618 | 0        | 0.00 |      |
| DQ553663 | 0        | 0.00 |      |
| DQ553711 | 0        | 0.00 |      |
| DQ553778 | 0        | 0.00 |      |
| DQ553816 | 0        | 0.00 |      |
| DQ553827 | 0        | 0.00 |      |
| DQ553839 | 0        | 0.00 |      |
| DQ553872 | 0        | 0.00 |      |
| DQ553881 | 0        | 0.00 |      |
| DQ553941 | 0        | 0.00 |      |
| DQ553947 | 0        | 0.00 |      |
| DQ553967 | 0        | 0.00 |      |
| DQ553972 | 0        | 0.00 |      |
| DQ553995 | 0        | 0.00 |      |
| DQ554009 | 0        | 0.00 |      |
| DQ554043 | 0        | 0.00 |      |
| DQ554056 | 0        | 0.00 |      |
| DQ554077 | 0        | 0.00 |      |
| DQ554087 | 0        | 0.00 |      |
| DQ554143 | 0        | 0.00 |      |
| DQ554183 | 0        | 0.00 |      |
| DQ554213 | 0        | 0.00 |      |

|          |   |      |  |
|----------|---|------|--|
| DQ554228 | 0 | 0.00 |  |
| DQ554281 | 0 | 0.00 |  |
| DQ554286 | 0 | 0.00 |  |
| DQ554303 | 0 | 0.00 |  |
| DQ554362 | 0 | 0.00 |  |
| DQ554395 | 0 | 0.00 |  |
| DQ554412 | 0 | 0.00 |  |
| DQ554414 | 0 | 0.00 |  |
| DQ554417 | 0 | 0.00 |  |
| DQ554434 | 0 | 0.00 |  |
| DQ554544 | 0 | 0.00 |  |
| DQ554622 | 0 | 0.00 |  |
| DQ554713 | 0 | 0.00 |  |
| DQ554718 | 0 | 0.00 |  |
| DQ554735 | 0 | 0.00 |  |
| DQ554737 | 0 | 0.00 |  |
| DQ554761 | 0 | 0.00 |  |
| DQ554804 | 0 | 0.00 |  |
| DQ554814 | 0 | 0.00 |  |
| DQ554951 | 0 | 0.00 |  |
| DQ555000 | 0 | 0.00 |  |
| DQ555008 | 0 | 0.00 |  |
| DQ555031 | 0 | 0.00 |  |
| DQ555142 | 0 | 0.00 |  |
| DQ555188 | 0 | 0.00 |  |
| DQ555193 | 0 | 0.00 |  |
| DQ555209 | 0 | 0.00 |  |
| DQ555237 | 0 | 0.00 |  |
| DQ555272 | 0 | 0.00 |  |
| DQ555274 | 0 | 0.00 |  |
| DQ555312 | 0 | 0.00 |  |
| DQ555342 | 0 | 0.00 |  |
| DQ555423 | 0 | 0.00 |  |
| DQ555424 | 0 | 0.00 |  |
| DQ555432 | 0 | 0.00 |  |
| DQ555438 | 0 | 0.00 |  |
| DQ555442 | 0 | 0.00 |  |
| DQ555443 | 0 | 0.00 |  |
| DQ555454 | 0 | 0.00 |  |
| DQ555467 | 0 | 0.00 |  |
| DQ555475 | 0 | 0.00 |  |
| DQ555500 | 0 | 0.00 |  |
| DQ555528 | 0 | 0.00 |  |
| DQ555542 | 0 | 0.00 |  |
| DQ555555 | 0 | 0.00 |  |
| DQ555568 | 0 | 0.00 |  |
| DQ555617 | 0 | 0.00 |  |

|          |   |      |  |
|----------|---|------|--|
| DQ555620 | 0 | 0.00 |  |
| DQ555636 | 0 | 0.00 |  |
| DQ555679 | 0 | 0.00 |  |
| DQ555728 | 0 | 0.00 |  |
| DQ555770 | 0 | 0.00 |  |
| DQ555790 | 0 | 0.00 |  |
| DQ555931 | 0 | 0.00 |  |
| DQ555935 | 0 | 0.00 |  |
| DQ555983 | 0 | 0.00 |  |
| DQ556009 | 0 | 0.00 |  |
| DQ556017 | 0 | 0.00 |  |
| DQ556020 | 0 | 0.00 |  |
| DQ556070 | 0 | 0.00 |  |
| DQ556074 | 0 | 0.00 |  |
| DQ556080 | 0 | 0.00 |  |
| DQ556087 | 0 | 0.00 |  |
| DQ556096 | 0 | 0.00 |  |
| DQ556130 | 0 | 0.00 |  |
| DQ556132 | 0 | 0.00 |  |
| DQ556136 | 0 | 0.00 |  |
| DQ556154 | 0 | 0.00 |  |
| DQ556157 | 0 | 0.00 |  |
| DQ556167 | 0 | 0.00 |  |
| DQ556184 | 0 | 0.00 |  |
| DQ556191 | 0 | 0.00 |  |
| DQ556195 | 0 | 0.00 |  |
| DQ556208 | 0 | 0.00 |  |
| DQ556210 | 0 | 0.00 |  |
| DQ556220 | 0 | 0.00 |  |
| DQ556266 | 0 | 0.00 |  |
| DQ556290 | 0 | 0.00 |  |
| DQ556292 | 0 | 0.00 |  |
| DQ556349 | 0 | 0.00 |  |
| DQ556350 | 0 | 0.00 |  |
| DQ556351 | 0 | 0.00 |  |
| DQ556384 | 0 | 0.00 |  |
| DQ556396 | 0 | 0.00 |  |
| DQ556400 | 0 | 0.00 |  |
| DQ556462 | 0 | 0.00 |  |
| DQ556485 | 0 | 0.00 |  |
| DQ556509 | 0 | 0.00 |  |
| DQ556518 | 0 | 0.00 |  |
| DQ556540 | 0 | 0.00 |  |
| DQ556660 | 0 | 0.00 |  |
| DQ556670 | 0 | 0.00 |  |
| DQ556681 | 0 | 0.00 |  |
| DQ556759 | 0 | 0.00 |  |

|          |   |      |  |
|----------|---|------|--|
| DQ556775 | 0 | 0.00 |  |
| DQ556784 | 0 | 0.00 |  |
| DQ556786 | 0 | 0.00 |  |
| DQ556830 | 0 | 0.00 |  |
| DQ556844 | 0 | 0.00 |  |
| DQ556852 | 0 | 0.00 |  |
| DQ556909 | 0 | 0.00 |  |
| DQ556983 | 0 | 0.00 |  |
| DQ557000 | 0 | 0.00 |  |
| DQ557036 | 0 | 0.00 |  |
| DQ557075 | 0 | 0.00 |  |
| DQ557199 | 0 | 0.00 |  |
| DQ557218 | 0 | 0.00 |  |
| DQ557254 | 0 | 0.00 |  |
| DQ557261 | 0 | 0.00 |  |
| DQ557269 | 0 | 0.00 |  |
| DQ557287 | 0 | 0.00 |  |
| DQ557309 | 0 | 0.00 |  |
| DQ557314 | 0 | 0.00 |  |
| DQ557323 | 0 | 0.00 |  |
| DQ557327 | 0 | 0.00 |  |
| DQ557359 | 0 | 0.00 |  |
| DQ557413 | 0 | 0.00 |  |
| DQ557426 | 0 | 0.00 |  |
| DQ557433 | 0 | 0.00 |  |
| DQ557440 | 0 | 0.00 |  |
| DQ557517 | 0 | 0.00 |  |
| DQ557551 | 0 | 0.00 |  |
| DQ557648 | 0 | 0.00 |  |
| DQ557665 | 0 | 0.00 |  |
| DQ557693 | 0 | 0.00 |  |
| DQ557702 | 0 | 0.00 |  |
| DQ557715 | 0 | 0.00 |  |
| DQ557814 | 0 | 0.00 |  |
| DQ557880 | 0 | 0.00 |  |
| DQ557896 | 0 | 0.00 |  |
| DQ557907 | 0 | 0.00 |  |
| DQ557910 | 0 | 0.00 |  |
| DQ557960 | 0 | 0.00 |  |
| DQ558014 | 0 | 0.00 |  |
| DQ558020 | 0 | 0.00 |  |
| DQ558043 | 0 | 0.00 |  |
| DQ558065 | 0 | 0.00 |  |
| DQ558068 | 0 | 0.00 |  |
| DQ558095 | 0 | 0.00 |  |
| DQ558102 | 0 | 0.00 |  |
| DQ558110 | 0 | 0.00 |  |

|          |   |      |  |
|----------|---|------|--|
| DQ558121 | 0 | 0.00 |  |
| DQ558230 | 0 | 0.00 |  |
| DQ558423 | 0 | 0.00 |  |
| DQ558508 | 0 | 0.00 |  |
| DQ558583 | 0 | 0.00 |  |
| DQ558605 | 0 | 0.00 |  |
| DQ558686 | 0 | 0.00 |  |
| DQ558780 | 0 | 0.00 |  |
| DQ558791 | 0 | 0.00 |  |
| DQ558885 | 0 | 0.00 |  |
| DQ558919 | 0 | 0.00 |  |
| DQ558960 | 0 | 0.00 |  |
| DQ558976 | 0 | 0.00 |  |
| DQ559130 | 0 | 0.00 |  |
| DQ559163 | 0 | 0.00 |  |
| DQ559474 | 0 | 0.00 |  |
| DQ559597 | 0 | 0.00 |  |
| DQ559606 | 0 | 0.00 |  |
| DQ559648 | 0 | 0.00 |  |
| DQ559678 | 0 | 0.00 |  |
| DQ559926 | 0 | 0.00 |  |
| DQ559937 | 0 | 0.00 |  |
| DQ560024 | 0 | 0.00 |  |
| DQ560072 | 0 | 0.00 |  |
| DQ560122 | 0 | 0.00 |  |
| DQ560132 | 0 | 0.00 |  |
| DQ560189 | 0 | 0.00 |  |
| DQ560204 | 0 | 0.00 |  |
| DQ560267 | 0 | 0.00 |  |
| DQ560276 | 0 | 0.00 |  |
| DQ560318 | 0 | 0.00 |  |
| DQ560399 | 0 | 0.00 |  |
| DQ560408 | 0 | 0.00 |  |
| DQ560421 | 0 | 0.00 |  |
| DQ560459 | 0 | 0.00 |  |
| DQ560463 | 0 | 0.00 |  |
| DQ560483 | 0 | 0.00 |  |
| DQ560594 | 0 | 0.00 |  |
| DQ560613 | 0 | 0.00 |  |
| DQ560618 | 0 | 0.00 |  |
| DQ560624 | 0 | 0.00 |  |
| DQ560645 | 0 | 0.00 |  |
| DQ560654 | 0 | 0.00 |  |
| DQ560656 | 0 | 0.00 |  |
| DQ560661 | 0 | 0.00 |  |
| DQ560729 | 0 | 0.00 |  |
| DQ560731 | 0 | 0.00 |  |



|          |           |      |       |
|----------|-----------|------|-------|
| DQ560765 | 0         | 0.00 |       |
| DQ560772 | 3.245092  | 0.87 | 26.8% |
| DQ560842 | 0         | 0.00 |       |
| DQ560888 | 0         | 0.00 |       |
| DQ560976 | 0         | 0.00 |       |
| DQ560983 | 0         | 0.00 |       |
| DQ561039 | 0         | 0.00 |       |
| DQ561056 | 0         | 0.00 |       |
| DQ561066 | 0         | 0.00 |       |
| DQ561150 | 0         | 0.00 |       |
| DQ561154 | 0         | 0.00 |       |
| DQ561165 | 0         | 0.00 |       |
| DQ561175 | 0         | 0.00 |       |
| DQ561259 | 0         | 0.00 |       |
| DQ561275 | 0         | 0.00 |       |
| DQ561281 | 0         | 0.00 |       |
| DQ561286 | 0         | 0.00 |       |
| DQ561289 | 0         | 0.00 |       |
| DQ561333 | 0         | 0.00 |       |
| DQ561355 | 0         | 0.00 |       |
| DQ561358 | 0         | 0.00 |       |
| DQ561359 | 0         | 0.00 |       |
| DQ561364 | 0         | 0.00 |       |
| DQ561366 | 0         | 0.00 |       |
| DQ561371 | 0         | 0.00 |       |
| DQ561373 | 0         | 0.00 |       |
| DQ561384 | 0         | 0.00 |       |
| DQ561391 | 0         | 0.00 |       |
| DQ561419 | 0         | 0.00 |       |
| DQ561426 | 0         | 0.00 |       |
| DQ561518 | 0         | 0.00 |       |
| DQ561527 | 0         | 0.00 |       |
| DQ561547 | 0         | 0.00 |       |
| DQ561579 | 0         | 0.00 |       |
| DQ561616 | 0.7618328 | 0.58 | 76.0% |
| DQ561682 | 0         | 0.00 |       |
| DQ561744 | 0         | 0.00 |       |
| DQ561781 | 0         | 0.00 |       |
| DQ561798 | 0         | 0.00 |       |
| DQ561838 | 0         | 0.00 |       |
| DQ561892 | 0         | 0.00 |       |
| DQ561908 | 0         | 0.00 |       |
| DQ561922 | 0         | 0.00 |       |
| DQ561948 | 0         | 0.00 |       |
| DQ562011 | 0         | 0.00 |       |
| DQ562020 | 0         | 0.00 |       |
| DQ562057 | 0         | 0.00 |       |

|          |   |      |  |
|----------|---|------|--|
| DQ562103 | 0 | 0.00 |  |
| DQ562131 | 0 | 0.00 |  |
| DQ562178 | 0 | 0.00 |  |
| DQ562194 | 0 | 0.00 |  |
| DQ562205 | 0 | 0.00 |  |
| DQ562220 | 0 | 0.00 |  |
| DQ562229 | 0 | 0.00 |  |
| DQ562254 | 0 | 0.00 |  |
| DQ562286 | 0 | 0.00 |  |
| DQ562297 | 0 | 0.00 |  |
| DQ562327 | 0 | 0.00 |  |
| DQ562345 | 0 | 0.00 |  |
| DQ562358 | 0 | 0.00 |  |
| DQ562384 | 0 | 0.00 |  |
| DQ562395 | 0 | 0.00 |  |
| DQ562459 | 0 | 0.00 |  |
| DQ562467 | 0 | 0.00 |  |
| DQ562510 | 0 | 0.00 |  |
| DQ562530 | 0 | 0.00 |  |
| DQ562556 | 0 | 0.00 |  |
| DQ562562 | 0 | 0.00 |  |
| DQ562580 | 0 | 0.00 |  |
| DQ562653 | 0 | 0.00 |  |
| DQ562682 | 0 | 0.00 |  |
| DQ562719 | 0 | 0.00 |  |
| DQ562746 | 0 | 0.00 |  |
| DQ562758 | 0 | 0.00 |  |
| DQ562776 | 0 | 0.00 |  |
| DQ562815 | 0 | 0.00 |  |
| DQ562822 | 0 | 0.00 |  |
| DQ562857 | 0 | 0.00 |  |
| DQ562875 | 0 | 0.00 |  |
| DQ562876 | 0 | 0.00 |  |
| DQ562883 | 0 | 0.00 |  |
| DQ562927 | 0 | 0.00 |  |
| DQ562964 | 0 | 0.00 |  |
| DQ562991 | 0 | 0.00 |  |
| DQ562993 | 0 | 0.00 |  |
| DQ562995 | 0 | 0.00 |  |
| DQ563063 | 0 | 0.00 |  |
| DQ563137 | 0 | 0.00 |  |
| DQ563224 | 0 | 0.00 |  |
| DQ563230 | 0 | 0.00 |  |
| DQ563315 | 0 | 0.00 |  |
| DQ563349 | 0 | 0.00 |  |
| DQ563356 | 0 | 0.00 |  |
| DQ563368 | 0 | 0.00 |  |

|          |   |      |  |
|----------|---|------|--|
| DQ563380 | 0 | 0.00 |  |
| DQ563452 | 0 | 0.00 |  |
| DQ563495 | 0 | 0.00 |  |
| DQ563500 | 0 | 0.00 |  |
| DQ563503 | 0 | 0.00 |  |
| DQ563505 | 0 | 0.00 |  |
| DQ563521 | 0 | 0.00 |  |
| DQ563597 | 0 | 0.00 |  |
| DQ563604 | 0 | 0.00 |  |
| DQ563616 | 0 | 0.00 |  |
| DQ563634 | 0 | 0.00 |  |
| DQ563658 | 0 | 0.00 |  |
| DQ563704 | 0 | 0.00 |  |
| DQ563733 | 0 | 0.00 |  |
| DQ563835 | 0 | 0.00 |  |
| DQ563867 | 0 | 0.00 |  |
| DQ563884 | 0 | 0.00 |  |
| DQ563906 | 0 | 0.00 |  |
| DQ563910 | 0 | 0.00 |  |
| DQ564011 | 0 | 0.00 |  |
| DQ564048 | 0 | 0.00 |  |
| DQ564056 | 0 | 0.00 |  |
| DQ564081 | 0 | 0.00 |  |
| DQ564178 | 0 | 0.00 |  |
| DQ564199 | 0 | 0.00 |  |
| DQ564238 | 0 | 0.00 |  |
| DQ564276 | 0 | 0.00 |  |
| DQ564299 | 0 | 0.00 |  |
| DQ564327 | 0 | 0.00 |  |
| DQ564349 | 0 | 0.00 |  |
| DQ564413 | 0 | 0.00 |  |
| DQ564424 | 0 | 0.00 |  |
| DQ564426 | 0 | 0.00 |  |
| DQ564444 | 0 | 0.00 |  |
| DQ564498 | 0 | 0.00 |  |
| DQ564514 | 0 | 0.00 |  |
| DQ564518 | 0 | 0.00 |  |
| DQ564566 | 0 | 0.00 |  |
| DQ564575 | 0 | 0.00 |  |
| DQ564592 | 0 | 0.00 |  |
| DQ564602 | 0 | 0.00 |  |
| DQ564617 | 0 | 0.00 |  |
| DQ564628 | 0 | 0.00 |  |
| DQ564716 | 0 | 0.00 |  |
| DQ564750 | 0 | 0.00 |  |
| DQ564778 | 0 | 0.00 |  |
| DQ564813 | 0 | 0.00 |  |

|          |   |      |  |
|----------|---|------|--|
| DQ564818 | 0 | 0.00 |  |
| DQ564835 | 0 | 0.00 |  |
| DQ564838 | 0 | 0.00 |  |
| DQ564894 | 0 | 0.00 |  |
| DQ564907 | 0 | 0.00 |  |
| DQ564912 | 0 | 0.00 |  |
| DQ564920 | 0 | 0.00 |  |
| DQ564937 | 0 | 0.00 |  |
| DQ564948 | 0 | 0.00 |  |
| DQ564951 | 0 | 0.00 |  |
| DQ565026 | 0 | 0.00 |  |
| DQ565064 | 0 | 0.00 |  |
| DQ565074 | 0 | 0.00 |  |
| DQ565149 | 0 | 0.00 |  |
| DQ565203 | 0 | 0.00 |  |
| DQ565213 | 0 | 0.00 |  |
| DQ565253 | 0 | 0.00 |  |
| DQ565270 | 0 | 0.00 |  |
| DQ565313 | 0 | 0.00 |  |
| DQ565376 | 0 | 0.00 |  |
| DQ565479 | 0 | 0.00 |  |
| DQ565491 | 0 | 0.00 |  |
| DQ565497 | 0 | 0.00 |  |
| DQ565516 | 0 | 0.00 |  |
| DQ565595 | 0 | 0.00 |  |
| DQ565607 | 0 | 0.00 |  |
| DQ565635 | 0 | 0.00 |  |
| DQ565646 | 0 | 0.00 |  |
| DQ565670 | 0 | 0.00 |  |
| DQ565709 | 0 | 0.00 |  |
| DQ565717 | 0 | 0.00 |  |
| DQ565738 | 0 | 0.00 |  |
| DQ565789 | 0 | 0.00 |  |
| DQ565798 | 0 | 0.00 |  |
| DQ565828 | 0 | 0.00 |  |
| DQ565854 | 0 | 0.00 |  |
| DQ565859 | 0 | 0.00 |  |
| DQ565975 | 0 | 0.00 |  |
| DQ565977 | 0 | 0.00 |  |
| DQ565978 | 0 | 0.00 |  |
| DQ566004 | 0 | 0.00 |  |
| DQ566013 | 0 | 0.00 |  |
| DQ566016 | 0 | 0.00 |  |
| DQ566045 | 0 | 0.00 |  |
| DQ566107 | 0 | 0.00 |  |
| DQ566114 | 0 | 0.00 |  |
| DQ566132 | 0 | 0.00 |  |

|          |   |      |  |
|----------|---|------|--|
| DQ566296 | 0 | 0.00 |  |
| DQ566326 | 0 | 0.00 |  |
| DQ566337 | 0 | 0.00 |  |
| DQ566408 | 0 | 0.00 |  |
| DQ566446 | 0 | 0.00 |  |
| DQ566455 | 0 | 0.00 |  |
| DQ566462 | 0 | 0.00 |  |
| DQ566510 | 0 | 0.00 |  |
| DQ566529 | 0 | 0.00 |  |
| DQ566590 | 0 | 0.00 |  |
| DQ566622 | 0 | 0.00 |  |
| DQ566656 | 0 | 0.00 |  |
| DQ566704 | 0 | 0.00 |  |
| DQ566736 | 0 | 0.00 |  |
| DQ566763 | 0 | 0.00 |  |
| DQ566768 | 0 | 0.00 |  |
| DQ566781 | 0 | 0.00 |  |
| DQ566885 | 0 | 0.00 |  |
| DQ566912 | 0 | 0.00 |  |
| DQ566918 | 0 | 0.00 |  |
| DQ566922 | 0 | 0.00 |  |
| DQ567021 | 0 | 0.00 |  |
| DQ567042 | 0 | 0.00 |  |
| DQ567094 | 0 | 0.00 |  |
| DQ567125 | 0 | 0.00 |  |
| DQ567154 | 0 | 0.00 |  |
| DQ567160 | 0 | 0.00 |  |
| DQ567356 | 0 | 0.00 |  |
| DQ567367 | 0 | 0.00 |  |
| DQ567429 | 0 | 0.00 |  |
| DQ567446 | 0 | 0.00 |  |
| DQ567479 | 0 | 0.00 |  |
| DQ567480 | 0 | 0.00 |  |
| DQ567485 | 0 | 0.00 |  |
| DQ567513 | 0 | 0.00 |  |
| DQ567533 | 0 | 0.00 |  |
| DQ567545 | 0 | 0.00 |  |
| DQ567628 | 0 | 0.00 |  |
| DQ567655 | 0 | 0.00 |  |
| DQ567693 | 0 | 0.00 |  |
| DQ567724 | 0 | 0.00 |  |
| DQ567784 | 0 | 0.00 |  |
| DQ567786 | 0 | 0.00 |  |
| DQ567796 | 0 | 0.00 |  |
| DQ567835 | 0 | 0.00 |  |
| DQ567862 | 0 | 0.00 |  |
| DQ567872 | 0 | 0.00 |  |

|          |   |      |  |
|----------|---|------|--|
| DQ567887 | 0 | 0.00 |  |
| DQ567921 | 0 | 0.00 |  |
| DQ567966 | 0 | 0.00 |  |
| DQ567985 | 0 | 0.00 |  |
| DQ567995 | 0 | 0.00 |  |
| DQ568005 | 0 | 0.00 |  |
| DQ568071 | 0 | 0.00 |  |
| DQ568095 | 0 | 0.00 |  |
| DQ568116 | 0 | 0.00 |  |
| DQ568121 | 0 | 0.00 |  |
| DQ568127 | 0 | 0.00 |  |
| DQ568153 | 0 | 0.00 |  |
| DQ568193 | 0 | 0.00 |  |
| DQ568245 | 0 | 0.00 |  |
| DQ568346 | 0 | 0.00 |  |
| DQ568352 | 0 | 0.00 |  |
| DQ568359 | 0 | 0.00 |  |
| DQ568384 | 0 | 0.00 |  |
| DQ568433 | 0 | 0.00 |  |
| DQ568457 | 0 | 0.00 |  |
| DQ568458 | 0 | 0.00 |  |
| DQ568508 | 0 | 0.00 |  |
| DQ568510 | 0 | 0.00 |  |
| DQ568525 | 0 | 0.00 |  |
| DQ568561 | 0 | 0.00 |  |
| DQ568566 | 0 | 0.00 |  |
| DQ568592 | 0 | 0.00 |  |
| DQ568607 | 0 | 0.00 |  |
| DQ568633 | 0 | 0.00 |  |
| DQ568657 | 0 | 0.00 |  |
| DQ568672 | 0 | 0.00 |  |
| DQ568728 | 0 | 0.00 |  |
| DQ568730 | 0 | 0.00 |  |
| DQ568775 | 0 | 0.00 |  |
| DQ568792 | 0 | 0.00 |  |
| DQ568855 | 0 | 0.00 |  |
| DQ568862 | 0 | 0.00 |  |
| DQ568925 | 0 | 0.00 |  |
| DQ568963 | 0 | 0.00 |  |
| DQ568996 | 0 | 0.00 |  |
| DQ568998 | 0 | 0.00 |  |
| DQ569210 | 0 | 0.00 |  |
| DQ569229 | 0 | 0.00 |  |
| DQ569232 | 0 | 0.00 |  |
| DQ569248 | 0 | 0.00 |  |
| DQ569264 | 0 | 0.00 |  |
| DQ569270 | 0 | 0.00 |  |

|          |   |      |  |
|----------|---|------|--|
| DQ569294 | 0 | 0.00 |  |
| DQ569369 | 0 | 0.00 |  |
| DQ569402 | 0 | 0.00 |  |
| DQ569434 | 0 | 0.00 |  |
| DQ569435 | 0 | 0.00 |  |
| DQ569443 | 0 | 0.00 |  |
| DQ569461 | 0 | 0.00 |  |
| DQ569478 | 0 | 0.00 |  |
| DQ569489 | 0 | 0.00 |  |
| DQ569537 | 0 | 0.00 |  |
| DQ569544 | 0 | 0.00 |  |
| DQ569553 | 0 | 0.00 |  |
| DQ569558 | 0 | 0.00 |  |
| DQ569600 | 0 | 0.00 |  |
| DQ569627 | 0 | 0.00 |  |
| DQ569637 | 0 | 0.00 |  |
| DQ569657 | 0 | 0.00 |  |
| DQ569686 | 0 | 0.00 |  |
| DQ569721 | 0 | 0.00 |  |
| DQ569722 | 0 | 0.00 |  |
| DQ569723 | 0 | 0.00 |  |
| DQ569753 | 0 | 0.00 |  |
| DQ569787 | 0 | 0.00 |  |
| DQ569827 | 0 | 0.00 |  |
| DQ569880 | 0 | 0.00 |  |
| DQ569883 | 0 | 0.00 |  |
| DQ569891 | 0 | 0.00 |  |
| DQ684691 | 0 | 0.00 |  |
| DQ684694 | 0 | 0.00 |  |
| DQ684698 | 0 | 0.00 |  |
| DQ684713 | 0 | 0.00 |  |
| DQ684763 | 0 | 0.00 |  |
| DQ684769 | 0 | 0.00 |  |
| DQ684799 | 0 | 0.00 |  |
| DQ684830 | 0 | 0.00 |  |
| DQ684877 | 0 | 0.00 |  |
| DQ684881 | 0 | 0.00 |  |
| DQ684909 | 0 | 0.00 |  |
| DQ684910 | 0 | 0.00 |  |
| DQ684917 | 0 | 0.00 |  |
| DQ684929 | 0 | 0.00 |  |
| DQ685022 | 0 | 0.00 |  |
| DQ685054 | 0 | 0.00 |  |
| DQ685077 | 0 | 0.00 |  |
| DQ685082 | 0 | 0.00 |  |
| DQ685100 | 0 | 0.00 |  |
| DQ685101 | 0 | 0.00 |  |

|          |   |      |  |
|----------|---|------|--|
| DQ685106 | 0 | 0.00 |  |
| DQ685109 | 0 | 0.00 |  |
| DQ685120 | 0 | 0.00 |  |
| DQ685128 | 0 | 0.00 |  |
| DQ685134 | 0 | 0.00 |  |
| DQ685173 | 0 | 0.00 |  |
| DQ685176 | 0 | 0.00 |  |
| DQ685187 | 0 | 0.00 |  |
| DQ685202 | 0 | 0.00 |  |
| DQ685226 | 0 | 0.00 |  |
| DQ685229 | 0 | 0.00 |  |
| DQ685280 | 0 | 0.00 |  |
| DQ685289 | 0 | 0.00 |  |
| DQ685298 | 0 | 0.00 |  |
| DQ685301 | 0 | 0.00 |  |
| DQ685312 | 0 | 0.00 |  |
| DQ685325 | 0 | 0.00 |  |
| DQ685350 | 0 | 0.00 |  |
| DQ685369 | 0 | 0.00 |  |
| DQ685458 | 0 | 0.00 |  |
| DQ685460 | 0 | 0.00 |  |
| DQ685524 | 0 | 0.00 |  |
| DQ685562 | 0 | 0.00 |  |
| DQ685565 | 0 | 0.00 |  |
| DQ685593 | 0 | 0.00 |  |
| DQ685610 | 0 | 0.00 |  |
| DQ685618 | 0 | 0.00 |  |
| DQ685621 | 0 | 0.00 |  |
| DQ685631 | 0 | 0.00 |  |
| DQ685645 | 0 | 0.00 |  |
| DQ685657 | 0 | 0.00 |  |
| DQ685694 | 0 | 0.00 |  |
| DQ685795 | 0 | 0.00 |  |
| DQ685806 | 0 | 0.00 |  |
| DQ685809 | 0 | 0.00 |  |
| DQ685811 | 0 | 0.00 |  |
| DQ685891 | 0 | 0.00 |  |
| DQ685895 | 0 | 0.00 |  |
| DQ685907 | 0 | 0.00 |  |
| DQ685919 | 0 | 0.00 |  |
| DQ685946 | 0 | 0.00 |  |
| DQ685947 | 0 | 0.00 |  |
| DQ685974 | 0 | 0.00 |  |
| DQ685977 | 0 | 0.00 |  |
| DQ686003 | 0 | 0.00 |  |
| DQ686008 | 0 | 0.00 |  |
| DQ686014 | 0 | 0.00 |  |



|          |   |      |  |
|----------|---|------|--|
| DQ686029 | 0 | 0.00 |  |
| DQ686040 | 0 | 0.00 |  |
| DQ686042 | 0 | 0.00 |  |
| DQ686061 | 0 | 0.00 |  |
| DQ686091 | 0 | 0.00 |  |
| DQ686092 | 0 | 0.00 |  |
| DQ686107 | 0 | 0.00 |  |
| DQ686125 | 0 | 0.00 |  |
| DQ686126 | 0 | 0.00 |  |
| DQ686130 | 0 | 0.00 |  |
| DQ686138 | 0 | 0.00 |  |
| DQ686143 | 0 | 0.00 |  |
| DQ686167 | 0 | 0.00 |  |
| DQ686181 | 0 | 0.00 |  |
| DQ686182 | 0 | 0.00 |  |
| DQ686199 | 0 | 0.00 |  |
| DQ686205 | 0 | 0.00 |  |
| DQ686227 | 0 | 0.00 |  |
| DQ686266 | 0 | 0.00 |  |
| DQ686274 | 0 | 0.00 |  |
| DQ686289 | 0 | 0.00 |  |
| DQ686310 | 0 | 0.00 |  |
| DQ686332 | 0 | 0.00 |  |
| DQ686359 | 0 | 0.00 |  |
| DQ686370 | 0 | 0.00 |  |
| DQ686384 | 0 | 0.00 |  |
| DQ686386 | 0 | 0.00 |  |
| DQ686389 | 0 | 0.00 |  |
| DQ686395 | 0 | 0.00 |  |
| DQ686411 | 0 | 0.00 |  |
| DQ686414 | 0 | 0.00 |  |
| DQ686437 | 0 | 0.00 |  |
| DQ686454 | 0 | 0.00 |  |
| DQ686472 | 0 | 0.00 |  |
| DQ686506 | 0 | 0.00 |  |
| DQ686518 | 0 | 0.00 |  |
| DQ686547 | 0 | 0.00 |  |
| DQ686550 | 0 | 0.00 |  |
| DQ686571 | 0 | 0.00 |  |
| DQ686574 | 0 | 0.00 |  |
| DQ686600 | 0 | 0.00 |  |
| DQ686635 | 0 | 0.00 |  |
| DQ686644 | 0 | 0.00 |  |
| DQ686655 | 0 | 0.00 |  |
| DQ686667 | 0 | 0.00 |  |
| DQ686674 | 0 | 0.00 |  |
| DQ686676 | 0 | 0.00 |  |

|          |   |      |  |
|----------|---|------|--|
| DQ686689 | 0 | 0.00 |  |
| DQ686693 | 0 | 0.00 |  |
| DQ686707 | 0 | 0.00 |  |
| DQ686731 | 0 | 0.00 |  |
| DQ686742 | 0 | 0.00 |  |
| DQ686744 | 0 | 0.00 |  |
| DQ686750 | 0 | 0.00 |  |
| DQ686802 | 0 | 0.00 |  |
| DQ686814 | 0 | 0.00 |  |
| DQ686818 | 0 | 0.00 |  |
| DQ686862 | 0 | 0.00 |  |
| DQ686870 | 0 | 0.00 |  |
| DQ686953 | 0 | 0.00 |  |
| DQ686960 | 0 | 0.00 |  |
| DQ686988 | 0 | 0.00 |  |
| DQ687013 | 0 | 0.00 |  |
| DQ687046 | 0 | 0.00 |  |
| DQ687084 | 0 | 0.00 |  |
| DQ687099 | 0 | 0.00 |  |
| DQ687106 | 0 | 0.00 |  |
| DQ687127 | 0 | 0.00 |  |
| DQ687132 | 0 | 0.00 |  |
| DQ687150 | 0 | 0.00 |  |
| DQ687153 | 0 | 0.00 |  |
| DQ687156 | 0 | 0.00 |  |
| DQ687171 | 0 | 0.00 |  |
| DQ687176 | 0 | 0.00 |  |
| DQ687198 | 0 | 0.00 |  |
| DQ687208 | 0 | 0.00 |  |
| DQ687226 | 0 | 0.00 |  |
| DQ687248 | 0 | 0.00 |  |
| DQ687290 | 0 | 0.00 |  |
| DQ687305 | 0 | 0.00 |  |
| DQ687328 | 0 | 0.00 |  |
| DQ687329 | 0 | 0.00 |  |
| DQ687334 | 0 | 0.00 |  |
| DQ687337 | 0 | 0.00 |  |
| DQ687339 | 0 | 0.00 |  |
| DQ687357 | 0 | 0.00 |  |
| DQ687367 | 0 | 0.00 |  |
| DQ687370 | 0 | 0.00 |  |
| DQ687373 | 0 | 0.00 |  |
| DQ687398 | 0 | 0.00 |  |
| DQ687481 | 0 | 0.00 |  |
| DQ687492 | 0 | 0.00 |  |
| DQ687495 | 0 | 0.00 |  |
| DQ687503 | 0 | 0.00 |  |

|          |        |      |        |
|----------|--------|------|--------|
| DQ687525 | 0      | 0.00 |        |
| DQ687551 | 0      | 0.00 |        |
| DQ687563 | 0      | 0.00 |        |
| DQ687584 | 0      | 0.00 |        |
| DQ687587 | 0      | 0.00 |        |
| DQ687612 | 0      | 0.00 |        |
| DQ687613 | 0      | 0.00 |        |
| DQ687636 | 0      | 0.00 |        |
| DQ687643 | 0      | 0.00 |        |
| DQ687657 | 0      | 0.00 |        |
| DQ687658 | 0      | 0.00 |        |
| DQ687660 | 0      | 0.00 |        |
| DQ687665 | 0      | 0.00 |        |
| DQ687709 | 0      | 0.00 |        |
| DQ687711 | 0      | 0.00 |        |
| DQ687771 | 0      | 0.00 |        |
| DQ687774 | 0      | 0.00 |        |
| DQ687790 | 0      | 0.00 |        |
| DQ687803 | 0      | 0.00 |        |
| DQ687821 | 0      | 0.00 |        |
| DQ687830 | 0      | 0.00 |        |
| DQ687895 | 0      | 0.00 |        |
| DQ687902 | 0      | 0.00 |        |
| DQ687955 | 0      | 0.00 |        |
| DQ688019 | 0      | 0.00 |        |
| DQ688048 | 0      | 0.00 |        |
| DQ688065 | 0      | 0.00 |        |
| DQ688096 | 0      | 0.00 |        |
| DQ688098 | 0      | 0.00 |        |
| DQ688102 | 0      | 0.00 |        |
| DQ688114 | 0      | 0.00 |        |
| DQ688115 | 0      | 0.00 |        |
| DQ688124 | 0      | 0.00 |        |
| DQ688126 | 0      | 0.00 |        |
| DQ688142 | 0.3174 | 0.71 | 223.6% |
| DQ688151 | 0      | 0.00 |        |
| DQ688189 | 0      | 0.00 |        |
| DQ688193 | 0      | 0.00 |        |
| DQ688225 | 0      | 0.00 |        |
| DQ688231 | 0      | 0.00 |        |
| DQ688238 | 0      | 0.00 |        |
| DQ688254 | 0      | 0.00 |        |
| DQ688323 | 0      | 0.00 |        |
| DQ688327 | 0      | 0.00 |        |
| DQ688332 | 0      | 0.00 |        |
| DQ688341 | 0      | 0.00 |        |
| DQ688370 | 0      | 0.00 |        |

|          |   |      |  |
|----------|---|------|--|
| DQ688388 | 0 | 0.00 |  |
| DQ688394 | 0 | 0.00 |  |
| DQ688408 | 0 | 0.00 |  |
| DQ688429 | 0 | 0.00 |  |
| DQ688435 | 0 | 0.00 |  |
| DQ688440 | 0 | 0.00 |  |
| DQ688473 | 0 | 0.00 |  |
| DQ688496 | 0 | 0.00 |  |
| DQ688503 | 0 | 0.00 |  |
| DQ688517 | 0 | 0.00 |  |
| DQ688556 | 0 | 0.00 |  |
| DQ688565 | 0 | 0.00 |  |
| DQ688608 | 0 | 0.00 |  |
| DQ688639 | 0 | 0.00 |  |
| DQ688640 | 0 | 0.00 |  |
| DQ688647 | 0 | 0.00 |  |
| DQ688664 | 0 | 0.00 |  |
| DQ688666 | 0 | 0.00 |  |
| DQ688679 | 0 | 0.00 |  |
| DQ688687 | 0 | 0.00 |  |
| DQ688694 | 0 | 0.00 |  |
| DQ688695 | 0 | 0.00 |  |
| DQ688703 | 0 | 0.00 |  |
| DQ688740 | 0 | 0.00 |  |
| DQ688757 | 0 | 0.00 |  |
| DQ688766 | 0 | 0.00 |  |
| DQ688826 | 0 | 0.00 |  |
| DQ688833 | 0 | 0.00 |  |
| DQ688834 | 0 | 0.00 |  |
| DQ688854 | 0 | 0.00 |  |
| DQ688862 | 0 | 0.00 |  |
| DQ688864 | 0 | 0.00 |  |
| DQ688882 | 0 | 0.00 |  |
| DQ688885 | 0 | 0.00 |  |
| DQ688913 | 0 | 0.00 |  |
| DQ688916 | 0 | 0.00 |  |
| DQ688935 | 0 | 0.00 |  |
| DQ688995 | 0 | 0.00 |  |
| DQ689040 | 0 | 0.00 |  |
| DQ689085 | 0 | 0.00 |  |
| DQ689096 | 0 | 0.00 |  |
| DQ689104 | 0 | 0.00 |  |
| DQ689110 | 0 | 0.00 |  |
| DQ689115 | 0 | 0.00 |  |
| DQ689126 | 0 | 0.00 |  |
| DQ689150 | 0 | 0.00 |  |
| DQ689242 | 0 | 0.00 |  |

|          |   |      |  |
|----------|---|------|--|
| DQ689250 | 0 | 0.00 |  |
| DQ689332 | 0 | 0.00 |  |
| DQ689358 | 0 | 0.00 |  |
| DQ689436 | 0 | 0.00 |  |
| DQ689443 | 0 | 0.00 |  |
| DQ689451 | 0 | 0.00 |  |
| DQ689476 | 0 | 0.00 |  |
| DQ689480 | 0 | 0.00 |  |
| DQ689483 | 0 | 0.00 |  |
| DQ689488 | 0 | 0.00 |  |
| DQ689581 | 0 | 0.00 |  |
| DQ689593 | 0 | 0.00 |  |
| DQ689603 | 0 | 0.00 |  |
| DQ689607 | 0 | 0.00 |  |
| DQ689650 | 0 | 0.00 |  |
| DQ689656 | 0 | 0.00 |  |
| DQ689676 | 0 | 0.00 |  |
| DQ689677 | 0 | 0.00 |  |
| DQ689702 | 0 | 0.00 |  |
| DQ689725 | 0 | 0.00 |  |
| DQ689729 | 0 | 0.00 |  |
| DQ689754 | 0 | 0.00 |  |
| DQ689765 | 0 | 0.00 |  |
| DQ689766 | 0 | 0.00 |  |
| DQ689782 | 0 | 0.00 |  |
| DQ689802 | 0 | 0.00 |  |
| DQ689835 | 0 | 0.00 |  |
| DQ689856 | 0 | 0.00 |  |
| DQ689871 | 0 | 0.00 |  |
| DQ689873 | 0 | 0.00 |  |
| DQ689881 | 0 | 0.00 |  |
| DQ689904 | 0 | 0.00 |  |
| DQ689945 | 0 | 0.00 |  |
| DQ689956 | 0 | 0.00 |  |
| DQ689966 | 0 | 0.00 |  |
| DQ689974 | 0 | 0.00 |  |
| DQ689989 | 0 | 0.00 |  |
| DQ690034 | 0 | 0.00 |  |
| DQ690080 | 0 | 0.00 |  |
| DQ690155 | 0 | 0.00 |  |
| DQ690161 | 0 | 0.00 |  |
| DQ690190 | 0 | 0.00 |  |
| DQ690205 | 0 | 0.00 |  |
| DQ690206 | 0 | 0.00 |  |
| DQ690216 | 0 | 0.00 |  |
| DQ690220 | 0 | 0.00 |  |
| DQ690224 | 0 | 0.00 |  |

|          |   |      |  |
|----------|---|------|--|
| DQ690284 | 0 | 0.00 |  |
| DQ690299 | 0 | 0.00 |  |
| DQ690311 | 0 | 0.00 |  |
| DQ690349 | 0 | 0.00 |  |
| DQ690373 | 0 | 0.00 |  |
| DQ690391 | 0 | 0.00 |  |
| DQ690425 | 0 | 0.00 |  |
| DQ690455 | 0 | 0.00 |  |
| DQ690487 | 0 | 0.00 |  |
| DQ690510 | 0 | 0.00 |  |
| DQ690514 | 0 | 0.00 |  |
| DQ690520 | 0 | 0.00 |  |
| DQ690536 | 0 | 0.00 |  |
| DQ690554 | 0 | 0.00 |  |
| DQ690559 | 0 | 0.00 |  |
| DQ690563 | 0 | 0.00 |  |
| DQ690574 | 0 | 0.00 |  |
| DQ690575 | 0 | 0.00 |  |
| DQ690615 | 0 | 0.00 |  |
| DQ690617 | 0 | 0.00 |  |
| DQ690622 | 0 | 0.00 |  |
| DQ690639 | 0 | 0.00 |  |
| DQ690641 | 0 | 0.00 |  |
| DQ690655 | 0 | 0.00 |  |
| DQ690676 | 0 | 0.00 |  |
| DQ690706 | 0 | 0.00 |  |
| DQ690714 | 0 | 0.00 |  |
| DQ690752 | 0 | 0.00 |  |
| DQ690769 | 0 | 0.00 |  |
| DQ690772 | 0 | 0.00 |  |
| DQ690809 | 0 | 0.00 |  |
| DQ690858 | 0 | 0.00 |  |
| DQ690904 | 0 | 0.00 |  |
| DQ690906 | 0 | 0.00 |  |
| DQ690931 | 0 | 0.00 |  |
| DQ690939 | 0 | 0.00 |  |
| DQ690982 | 0 | 0.00 |  |
| DQ691027 | 0 | 0.00 |  |
| DQ691051 | 0 | 0.00 |  |
| DQ691069 | 0 | 0.00 |  |
| DQ691074 | 0 | 0.00 |  |
| DQ691086 | 0 | 0.00 |  |
| DQ691089 | 0 | 0.00 |  |
| DQ691118 | 0 | 0.00 |  |
| DQ691150 | 0 | 0.00 |  |
| DQ691191 | 0 | 0.00 |  |
| DQ691236 | 0 | 0.00 |  |

|          |          |      |        |
|----------|----------|------|--------|
| DQ691244 | 0        | 0.00 |        |
| DQ691258 | 0        | 0.00 |        |
| DQ691263 | 0        | 0.00 |        |
| DQ691281 | 0        | 0.00 |        |
| DQ691284 | 0        | 0.00 |        |
| DQ691295 | 0        | 0.00 |        |
| DQ691313 | 0        | 0.00 |        |
| DQ691347 | 0        | 0.00 |        |
| DQ691372 | 0        | 0.00 |        |
| DQ691381 | 0        | 0.00 |        |
| DQ691393 | 0        | 0.00 |        |
| DQ691398 | 0        | 0.00 |        |
| DQ691417 | 0        | 0.00 |        |
| DQ691421 | 0        | 0.00 |        |
| DQ691427 | 0        | 0.00 |        |
| DQ691435 | 0        | 0.00 |        |
| DQ691477 | 0        | 0.00 |        |
| DQ691498 | 0        | 0.00 |        |
| DQ691512 | 0        | 0.00 |        |
| DQ691522 | 0        | 0.00 |        |
| DQ691537 | 0        | 0.00 |        |
| DQ691565 | 0        | 0.00 |        |
| DQ691575 | 0        | 0.00 |        |
| DQ691590 | 0        | 0.00 |        |
| DQ691591 | 0        | 0.00 |        |
| DQ691614 | 0        | 0.00 |        |
| DQ691628 | 0        | 0.00 |        |
| DQ691629 | 0        | 0.00 |        |
| DQ691637 | 0        | 0.00 |        |
| DQ691656 | 0        | 0.00 |        |
| DQ691659 | 0        | 0.00 |        |
| DQ691666 | 0        | 0.00 |        |
| DQ691809 | 0        | 0.00 |        |
| DQ691824 | 0        | 0.00 |        |
| DQ691826 | 0        | 0.00 |        |
| DQ691839 | 0        | 0.00 |        |
| DQ691873 | 0        | 0.00 |        |
| DQ691876 | 0        | 0.00 |        |
| DQ691885 | 0        | 0.00 |        |
| DQ691918 | 0.292798 | 0.65 | 223.6% |
| DQ691942 | 0        | 0.00 |        |
| DQ691946 | 0        | 0.00 |        |
| DQ691962 | 0        | 0.00 |        |
| DQ692003 | 0        | 0.00 |        |
| DQ692005 | 0        | 0.00 |        |
| DQ692011 | 0        | 0.00 |        |
| DQ692040 | 0        | 0.00 |        |

|          |   |      |  |
|----------|---|------|--|
| DQ692044 | 0 | 0.00 |  |
| DQ692052 | 0 | 0.00 |  |
| DQ692066 | 0 | 0.00 |  |
| DQ692070 | 0 | 0.00 |  |
| DQ692085 | 0 | 0.00 |  |
| DQ692087 | 0 | 0.00 |  |
| DQ692099 | 0 | 0.00 |  |
| DQ692123 | 0 | 0.00 |  |
| DQ692154 | 0 | 0.00 |  |
| DQ692163 | 0 | 0.00 |  |
| DQ692167 | 0 | 0.00 |  |
| DQ692176 | 0 | 0.00 |  |
| DQ692178 | 0 | 0.00 |  |
| DQ692221 | 0 | 0.00 |  |
| DQ692255 | 0 | 0.00 |  |
| DQ692282 | 0 | 0.00 |  |
| DQ692312 | 0 | 0.00 |  |
| DQ692328 | 0 | 0.00 |  |
| DQ692337 | 0 | 0.00 |  |
| DQ692342 | 0 | 0.00 |  |
| DQ692353 | 0 | 0.00 |  |
| DQ692361 | 0 | 0.00 |  |
| DQ692365 | 0 | 0.00 |  |
| DQ692371 | 0 | 0.00 |  |
| DQ692397 | 0 | 0.00 |  |
| DQ692402 | 0 | 0.00 |  |
| DQ692405 | 0 | 0.00 |  |
| DQ692414 | 0 | 0.00 |  |
| DQ692419 | 0 | 0.00 |  |
| DQ692422 | 0 | 0.00 |  |
| DQ692466 | 0 | 0.00 |  |
| DQ692484 | 0 | 0.00 |  |
| DQ692485 | 0 | 0.00 |  |
| DQ692500 | 0 | 0.00 |  |
| DQ692517 | 0 | 0.00 |  |
| DQ692519 | 0 | 0.00 |  |
| DQ692526 | 0 | 0.00 |  |
| DQ692542 | 0 | 0.00 |  |
| DQ692550 | 0 | 0.00 |  |
| DQ692567 | 0 | 0.00 |  |
| DQ692580 | 0 | 0.00 |  |
| DQ692601 | 0 | 0.00 |  |
| DQ692605 | 0 | 0.00 |  |
| DQ692606 | 0 | 0.00 |  |
| DQ692629 | 0 | 0.00 |  |
| DQ692632 | 0 | 0.00 |  |
| DQ692637 | 0 | 0.00 |  |



|          |   |      |  |
|----------|---|------|--|
| DQ692648 | 0 | 0.00 |  |
| DQ692655 | 0 | 0.00 |  |
| DQ692658 | 0 | 0.00 |  |
| DQ692659 | 0 | 0.00 |  |
| DQ692674 | 0 | 0.00 |  |
| DQ692680 | 0 | 0.00 |  |
| DQ692714 | 0 | 0.00 |  |
| DQ692748 | 0 | 0.00 |  |
| DQ692750 | 0 | 0.00 |  |
| DQ692751 | 0 | 0.00 |  |
| DQ692767 | 0 | 0.00 |  |
| DQ692774 | 0 | 0.00 |  |
| DQ692785 | 0 | 0.00 |  |
| DQ692803 | 0 | 0.00 |  |
| DQ692804 | 0 | 0.00 |  |
| DQ692822 | 0 | 0.00 |  |
| DQ692840 | 0 | 0.00 |  |
| DQ692874 | 0 | 0.00 |  |
| DQ692889 | 0 | 0.00 |  |
| DQ692898 | 0 | 0.00 |  |
| DQ692926 | 0 | 0.00 |  |
| DQ692955 | 0 | 0.00 |  |
| DQ692983 | 0 | 0.00 |  |
| DQ693004 | 0 | 0.00 |  |
| DQ693016 | 0 | 0.00 |  |
| DQ693081 | 0 | 0.00 |  |
| DQ693128 | 0 | 0.00 |  |
| DQ693130 | 0 | 0.00 |  |
| DQ693132 | 0 | 0.00 |  |
| DQ693159 | 0 | 0.00 |  |
| DQ693219 | 0 | 0.00 |  |
| DQ693224 | 0 | 0.00 |  |
| DQ693233 | 0 | 0.00 |  |
| DQ693239 | 0 | 0.00 |  |
| DQ693245 | 0 | 0.00 |  |
| DQ693247 | 0 | 0.00 |  |
| DQ693283 | 0 | 0.00 |  |
| DQ693303 | 0 | 0.00 |  |
| DQ693330 | 0 | 0.00 |  |
| DQ693348 | 0 | 0.00 |  |
| DQ693362 | 0 | 0.00 |  |
| DQ693371 | 0 | 0.00 |  |
| DQ693385 | 0 | 0.00 |  |
| DQ693426 | 0 | 0.00 |  |
| DQ693432 | 0 | 0.00 |  |
| DQ693437 | 0 | 0.00 |  |
| DQ693451 | 0 | 0.00 |  |

|          |   |      |  |
|----------|---|------|--|
| DQ693458 | 0 | 0.00 |  |
| DQ693466 | 0 | 0.00 |  |
| DQ693481 | 0 | 0.00 |  |
| DQ693536 | 0 | 0.00 |  |
| DQ693547 | 0 | 0.00 |  |
| DQ693555 | 0 | 0.00 |  |
| DQ693563 | 0 | 0.00 |  |
| DQ693585 | 0 | 0.00 |  |
| DQ693587 | 0 | 0.00 |  |
| DQ693599 | 0 | 0.00 |  |
| DQ693608 | 0 | 0.00 |  |
| DQ693615 | 0 | 0.00 |  |
| DQ693626 | 0 | 0.00 |  |
| DQ693681 | 0 | 0.00 |  |
| DQ693684 | 0 | 0.00 |  |
| DQ693697 | 0 | 0.00 |  |
| DQ693763 | 0 | 0.00 |  |
| DQ693766 | 0 | 0.00 |  |
| DQ693841 | 0 | 0.00 |  |
| DQ693890 | 0 | 0.00 |  |
| DQ693943 | 0 | 0.00 |  |
| DQ694023 | 0 | 0.00 |  |
| DQ694039 | 0 | 0.00 |  |
| DQ694045 | 0 | 0.00 |  |
| DQ694056 | 0 | 0.00 |  |
| DQ694073 | 0 | 0.00 |  |
| DQ694086 | 0 | 0.00 |  |
| DQ694120 | 0 | 0.00 |  |
| DQ694131 | 0 | 0.00 |  |
| DQ694138 | 0 | 0.00 |  |
| DQ694154 | 0 | 0.00 |  |
| DQ694167 | 0 | 0.00 |  |
| DQ694195 | 0 | 0.00 |  |
| DQ694222 | 0 | 0.00 |  |
| DQ694250 | 0 | 0.00 |  |
| DQ694251 | 0 | 0.00 |  |
| DQ694273 | 0 | 0.00 |  |
| DQ694302 | 0 | 0.00 |  |
| DQ694348 | 0 | 0.00 |  |
| DQ694442 | 0 | 0.00 |  |
| DQ694455 | 0 | 0.00 |  |
| DQ694462 | 0 | 0.00 |  |
| DQ694471 | 0 | 0.00 |  |
| DQ694503 | 0 | 0.00 |  |
| DQ694548 | 0 | 0.00 |  |
| DQ694553 | 0 | 0.00 |  |
| DQ694559 | 0 | 0.00 |  |

|          |   |      |  |
|----------|---|------|--|
| DQ694571 | 0 | 0.00 |  |
| DQ694598 | 0 | 0.00 |  |
| DQ694599 | 0 | 0.00 |  |
| DQ694605 | 0 | 0.00 |  |
| DQ694625 | 0 | 0.00 |  |
| DQ694636 | 0 | 0.00 |  |
| DQ694656 | 0 | 0.00 |  |
| DQ694702 | 0 | 0.00 |  |
| DQ694705 | 0 | 0.00 |  |
| DQ694711 | 0 | 0.00 |  |
| DQ694726 | 0 | 0.00 |  |
| DQ694728 | 0 | 0.00 |  |
| DQ694760 | 0 | 0.00 |  |
| DQ694768 | 0 | 0.00 |  |
| DQ694780 | 0 | 0.00 |  |
| DQ694781 | 0 | 0.00 |  |
| DQ694814 | 0 | 0.00 |  |
| DQ694834 | 0 | 0.00 |  |
| DQ694838 | 0 | 0.00 |  |
| DQ694846 | 0 | 0.00 |  |
| DQ694852 | 0 | 0.00 |  |
| DQ694857 | 0 | 0.00 |  |
| DQ694887 | 0 | 0.00 |  |
| DQ694892 | 0 | 0.00 |  |
| DQ694903 | 0 | 0.00 |  |
| DQ694912 | 0 | 0.00 |  |
| DQ694932 | 0 | 0.00 |  |
| DQ694934 | 0 | 0.00 |  |
| DQ694944 | 0 | 0.00 |  |
| DQ694960 | 0 | 0.00 |  |
| DQ694964 | 0 | 0.00 |  |
| DQ695012 | 0 | 0.00 |  |
| DQ695013 | 0 | 0.00 |  |
| DQ695014 | 0 | 0.00 |  |
| DQ695017 | 0 | 0.00 |  |
| DQ695049 | 0 | 0.00 |  |
| DQ695053 | 0 | 0.00 |  |
| DQ695059 | 0 | 0.00 |  |
| DQ695082 | 0 | 0.00 |  |
| DQ695085 | 0 | 0.00 |  |
| DQ695092 | 0 | 0.00 |  |
| DQ695109 | 0 | 0.00 |  |
| DQ695125 | 0 | 0.00 |  |
| DQ695127 | 0 | 0.00 |  |
| DQ695156 | 0 | 0.00 |  |
| DQ695187 | 0 | 0.00 |  |
| DQ695197 | 0 | 0.00 |  |

|          |   |      |  |
|----------|---|------|--|
| DQ695213 | 0 | 0.00 |  |
| DQ695223 | 0 | 0.00 |  |
| DQ695238 | 0 | 0.00 |  |
| DQ695242 | 0 | 0.00 |  |
| DQ695250 | 0 | 0.00 |  |
| DQ695285 | 0 | 0.00 |  |
| DQ695289 | 0 | 0.00 |  |
| DQ695326 | 0 | 0.00 |  |
| DQ695332 | 0 | 0.00 |  |
| DQ695344 | 0 | 0.00 |  |
| DQ695354 | 0 | 0.00 |  |
| DQ695356 | 0 | 0.00 |  |
| DQ695412 | 0 | 0.00 |  |
| DQ695450 | 0 | 0.00 |  |
| DQ695469 | 0 | 0.00 |  |
| DQ695529 | 0 | 0.00 |  |
| DQ695538 | 0 | 0.00 |  |
| DQ695567 | 0 | 0.00 |  |
| DQ695570 | 0 | 0.00 |  |
| DQ695612 | 0 | 0.00 |  |
| DQ695624 | 0 | 0.00 |  |
| DQ695667 | 0 | 0.00 |  |
| DQ695691 | 0 | 0.00 |  |
| DQ695717 | 0 | 0.00 |  |
| DQ695744 | 0 | 0.00 |  |
| DQ695761 | 0 | 0.00 |  |
| DQ695786 | 0 | 0.00 |  |
| DQ695801 | 0 | 0.00 |  |
| DQ695813 | 0 | 0.00 |  |
| DQ695827 | 0 | 0.00 |  |
| DQ695859 | 0 | 0.00 |  |
| DQ695881 | 0 | 0.00 |  |
| DQ695884 | 0 | 0.00 |  |
| DQ695909 | 0 | 0.00 |  |
| DQ695911 | 0 | 0.00 |  |
| DQ695947 | 0 | 0.00 |  |
| DQ695949 | 0 | 0.00 |  |
| DQ695960 | 0 | 0.00 |  |
| DQ695964 | 0 | 0.00 |  |
| DQ695991 | 0 | 0.00 |  |
| DQ696009 | 0 | 0.00 |  |
| DQ696026 | 0 | 0.00 |  |
| DQ696040 | 0 | 0.00 |  |
| DQ696046 | 0 | 0.00 |  |
| DQ696055 | 0 | 0.00 |  |
| DQ696073 | 0 | 0.00 |  |
| DQ696095 | 0 | 0.00 |  |

|          |   |      |  |
|----------|---|------|--|
| DQ696105 | 0 | 0.00 |  |
| DQ696182 | 0 | 0.00 |  |
| DQ696186 | 0 | 0.00 |  |
| DQ696189 | 0 | 0.00 |  |
| DQ696198 | 0 | 0.00 |  |
| DQ696209 | 0 | 0.00 |  |
| DQ696253 | 0 | 0.00 |  |
| DQ696267 | 0 | 0.00 |  |
| DQ696282 | 0 | 0.00 |  |
| DQ696303 | 0 | 0.00 |  |
| DQ696325 | 0 | 0.00 |  |
| DQ696335 | 0 | 0.00 |  |
| DQ696348 | 0 | 0.00 |  |
| DQ696405 | 0 | 0.00 |  |
| DQ696417 | 0 | 0.00 |  |
| DQ696435 | 0 | 0.00 |  |
| DQ696446 | 0 | 0.00 |  |
| DQ696487 | 0 | 0.00 |  |
| DQ696544 | 0 | 0.00 |  |
| DQ696597 | 0 | 0.00 |  |
| DQ696615 | 0 | 0.00 |  |
| DQ696619 | 0 | 0.00 |  |
| DQ696623 | 0 | 0.00 |  |
| DQ696633 | 0 | 0.00 |  |
| DQ696666 | 0 | 0.00 |  |
| DQ696703 | 0 | 0.00 |  |
| DQ696725 | 0 | 0.00 |  |
| DQ696739 | 0 | 0.00 |  |
| DQ696806 | 0 | 0.00 |  |
| DQ696813 | 0 | 0.00 |  |
| DQ696815 | 0 | 0.00 |  |
| DQ696825 | 0 | 0.00 |  |
| DQ696832 | 0 | 0.00 |  |
| DQ696836 | 0 | 0.00 |  |
| DQ696837 | 0 | 0.00 |  |
| DQ696873 | 0 | 0.00 |  |
| DQ696923 | 0 | 0.00 |  |
| DQ696926 | 0 | 0.00 |  |
| DQ696941 | 0 | 0.00 |  |
| DQ696944 | 0 | 0.00 |  |
| DQ696976 | 0 | 0.00 |  |
| DQ697004 | 0 | 0.00 |  |
| DQ697005 | 0 | 0.00 |  |
| DQ697027 | 0 | 0.00 |  |
| DQ697053 | 0 | 0.00 |  |
| DQ697067 | 0 | 0.00 |  |
| DQ697070 | 0 | 0.00 |  |

|          |           |      |        |
|----------|-----------|------|--------|
| DQ697096 | 0.1561312 | 0.35 | 223.6% |
| DQ697120 | 0         | 0.00 |        |
| DQ697124 | 0         | 0.00 |        |
| DQ697151 | 0         | 0.00 |        |
| DQ697183 | 0         | 0.00 |        |
| DQ697222 | 0         | 0.00 |        |
| DQ697233 | 0         | 0.00 |        |
| DQ697253 | 0         | 0.00 |        |
| DQ697298 | 0         | 0.00 |        |
| DQ697303 | 0         | 0.00 |        |
| DQ697314 | 0         | 0.00 |        |
| DQ697332 | 0         | 0.00 |        |
| DQ697348 | 0         | 0.00 |        |
| DQ697364 | 0         | 0.00 |        |
| DQ697366 | 0         | 0.00 |        |
| DQ697370 | 0         | 0.00 |        |
| DQ697373 | 0         | 0.00 |        |
| DQ697403 | 0         | 0.00 |        |
| DQ697422 | 0         | 0.00 |        |
| DQ697472 | 0         | 0.00 |        |
| DQ697475 | 0         | 0.00 |        |
| DQ697489 | 0         | 0.00 |        |
| DQ697495 | 0         | 0.00 |        |
| DQ697509 | 0         | 0.00 |        |
| DQ697538 | 0         | 0.00 |        |
| DQ697567 | 0         | 0.00 |        |
| DQ697578 | 0         | 0.00 |        |
| DQ697620 | 0         | 0.00 |        |
| DQ697642 | 0         | 0.00 |        |
| DQ697673 | 0         | 0.00 |        |
| DQ697701 | 0         | 0.00 |        |
| DQ697726 | 0         | 0.00 |        |
| DQ697752 | 0         | 0.00 |        |
| DQ697774 | 0         | 0.00 |        |
| DQ697836 | 0         | 0.00 |        |
| DQ697848 | 0         | 0.00 |        |
| DQ697893 | 0         | 0.00 |        |
| DQ697912 | 0         | 0.00 |        |
| DQ697944 | 0         | 0.00 |        |
| DQ697946 | 0         | 0.00 |        |
| DQ697988 | 0         | 0.00 |        |
| DQ697992 | 0         | 0.00 |        |
| DQ698005 | 0         | 0.00 |        |
| DQ698039 | 0         | 0.00 |        |
| DQ698049 | 0         | 0.00 |        |
| DQ698060 | 0         | 0.00 |        |
| DQ698080 | 0         | 0.00 |        |

|          |   |      |  |
|----------|---|------|--|
| DQ698081 | 0 | 0.00 |  |
| DQ698136 | 0 | 0.00 |  |
| DQ698138 | 0 | 0.00 |  |
| DQ698173 | 0 | 0.00 |  |
| DQ698179 | 0 | 0.00 |  |
| DQ698182 | 0 | 0.00 |  |
| DQ698221 | 0 | 0.00 |  |
| DQ698253 | 0 | 0.00 |  |
| DQ698272 | 0 | 0.00 |  |
| DQ698276 | 0 | 0.00 |  |
| DQ698328 | 0 | 0.00 |  |
| DQ698341 | 0 | 0.00 |  |
| DQ698355 | 0 | 0.00 |  |
| DQ698370 | 0 | 0.00 |  |
| DQ698417 | 0 | 0.00 |  |
| DQ698427 | 0 | 0.00 |  |
| DQ698435 | 0 | 0.00 |  |
| DQ698459 | 0 | 0.00 |  |
| DQ698460 | 0 | 0.00 |  |
| DQ698463 | 0 | 0.00 |  |
| DQ698470 | 0 | 0.00 |  |
| DQ698474 | 0 | 0.00 |  |
| DQ698476 | 0 | 0.00 |  |
| DQ698478 | 0 | 0.00 |  |
| DQ698532 | 0 | 0.00 |  |
| DQ698553 | 0 | 0.00 |  |
| DQ698559 | 0 | 0.00 |  |
| DQ698563 | 0 | 0.00 |  |
| DQ698574 | 0 | 0.00 |  |
| DQ698583 | 0 | 0.00 |  |
| DQ698589 | 0 | 0.00 |  |
| DQ698598 | 0 | 0.00 |  |
| DQ698602 | 0 | 0.00 |  |
| DQ698625 | 0 | 0.00 |  |
| DQ698688 | 0 | 0.00 |  |
| DQ698692 | 0 | 0.00 |  |
| DQ698722 | 0 | 0.00 |  |
| DQ698748 | 0 | 0.00 |  |
| DQ698749 | 0 | 0.00 |  |
| DQ698755 | 0 | 0.00 |  |
| DQ698761 | 0 | 0.00 |  |
| DQ698767 | 0 | 0.00 |  |
| DQ698772 | 0 | 0.00 |  |
| DQ698791 | 0 | 0.00 |  |
| DQ698807 | 0 | 0.00 |  |
| DQ698829 | 0 | 0.00 |  |
| DQ698838 | 0 | 0.00 |  |

|          |           |      |       |
|----------|-----------|------|-------|
| DQ698848 | 0         | 0.00 |       |
| DQ698861 | 0         | 0.00 |       |
| DQ698879 | 0         | 0.00 |       |
| DQ698885 | 0         | 0.00 |       |
| DQ698894 | 0         | 0.00 |       |
| DQ698901 | 0         | 0.00 |       |
| DQ698911 | 0         | 0.00 |       |
| DQ698920 | 0         | 0.00 |       |
| DQ698970 | 0         | 0.00 |       |
| DQ699063 | 0         | 0.00 |       |
| DQ699068 | 0         | 0.00 |       |
| DQ699081 | 0         | 0.00 |       |
| DQ699108 | 0         | 0.00 |       |
| DQ699135 | 0         | 0.00 |       |
| DQ699139 | 0         | 0.00 |       |
| DQ699161 | 0         | 0.00 |       |
| DQ699237 | 0         | 0.00 |       |
| DQ699248 | 0         | 0.00 |       |
| DQ699275 | 0         | 0.00 |       |
| DQ699288 | 0         | 0.00 |       |
| DQ699365 | 0         | 0.00 |       |
| DQ699366 | 0         | 0.00 |       |
| DQ699373 | 0         | 0.00 |       |
| DQ699395 | 0         | 0.00 |       |
| DQ699411 | 0         | 0.00 |       |
| DQ699481 | 0         | 0.00 |       |
| DQ699523 | 1.0616182 | 0.25 | 23.3% |
| DQ699575 | 0         | 0.00 |       |
| DQ699636 | 0         | 0.00 |       |
| DQ699669 | 0         | 0.00 |       |
| DQ699675 | 0         | 0.00 |       |
| DQ699682 | 0         | 0.00 |       |
| DQ699684 | 0         | 0.00 |       |
| DQ699688 | 0         | 0.00 |       |
| DQ699700 | 0         | 0.00 |       |
| DQ699808 | 0         | 0.00 |       |
| DQ699817 | 0         | 0.00 |       |
| DQ699830 | 0         | 0.00 |       |
| DQ699833 | 0         | 0.00 |       |
| DQ699844 | 0         | 0.00 |       |
| DQ699883 | 0         | 0.00 |       |
| DQ699907 | 0         | 0.00 |       |
| DQ699918 | 0         | 0.00 |       |
| DQ699921 | 0         | 0.00 |       |
| DQ699928 | 0         | 0.00 |       |
| DQ699940 | 0         | 0.00 |       |
| DQ699947 | 0         | 0.00 |       |



|          |   |      |  |
|----------|---|------|--|
| DQ699981 | 0 | 0.00 |  |
| DQ699990 | 0 | 0.00 |  |
| DQ700012 | 0 | 0.00 |  |
| DQ700023 | 0 | 0.00 |  |
| DQ700040 | 0 | 0.00 |  |
| DQ700075 | 0 | 0.00 |  |
| DQ700079 | 0 | 0.00 |  |
| DQ700103 | 0 | 0.00 |  |
| DQ700114 | 0 | 0.00 |  |
| DQ700154 | 0 | 0.00 |  |
| DQ700184 | 0 | 0.00 |  |
| DQ700189 | 0 | 0.00 |  |
| DQ700265 | 0 | 0.00 |  |
| DQ700318 | 0 | 0.00 |  |
| DQ700325 | 0 | 0.00 |  |
| DQ700364 | 0 | 0.00 |  |
| DQ700365 | 0 | 0.00 |  |
| DQ700366 | 0 | 0.00 |  |
| DQ700372 | 0 | 0.00 |  |
| DQ700379 | 0 | 0.00 |  |
| DQ700388 | 0 | 0.00 |  |
| DQ700390 | 0 | 0.00 |  |
| DQ700395 | 0 | 0.00 |  |
| DQ700417 | 0 | 0.00 |  |
| DQ700421 | 0 | 0.00 |  |
| DQ700448 | 0 | 0.00 |  |
| DQ700505 | 0 | 0.00 |  |
| DQ700514 | 0 | 0.00 |  |
| DQ700517 | 0 | 0.00 |  |
| DQ700539 | 0 | 0.00 |  |
| DQ700541 | 0 | 0.00 |  |
| DQ700559 | 0 | 0.00 |  |
| DQ700565 | 0 | 0.00 |  |
| DQ700577 | 0 | 0.00 |  |
| DQ700581 | 0 | 0.00 |  |
| DQ700641 | 0 | 0.00 |  |
| DQ700643 | 0 | 0.00 |  |
| DQ700655 | 0 | 0.00 |  |
| DQ700691 | 0 | 0.00 |  |
| DQ700738 | 0 | 0.00 |  |
| DQ700748 | 0 | 0.00 |  |
| DQ700818 | 0 | 0.00 |  |
| DQ700826 | 0 | 0.00 |  |
| DQ700852 | 0 | 0.00 |  |
| DQ700866 | 0 | 0.00 |  |
| DQ700870 | 0 | 0.00 |  |
| DQ700891 | 0 | 0.00 |  |

|          |   |      |  |
|----------|---|------|--|
| DQ700900 | 0 | 0.00 |  |
| DQ700905 | 0 | 0.00 |  |
| DQ700909 | 0 | 0.00 |  |
| DQ700921 | 0 | 0.00 |  |
| DQ700977 | 0 | 0.00 |  |
| DQ700980 | 0 | 0.00 |  |
| DQ701001 | 0 | 0.00 |  |
| DQ701015 | 0 | 0.00 |  |
| DQ701047 | 0 | 0.00 |  |
| DQ701068 | 0 | 0.00 |  |
| DQ701088 | 0 | 0.00 |  |
| DQ701108 | 0 | 0.00 |  |
| DQ701143 | 0 | 0.00 |  |
| DQ701172 | 0 | 0.00 |  |
| DQ701178 | 0 | 0.00 |  |
| DQ701201 | 0 | 0.00 |  |
| DQ701251 | 0 | 0.00 |  |
| DQ701279 | 0 | 0.00 |  |
| DQ701288 | 0 | 0.00 |  |
| DQ701289 | 0 | 0.00 |  |
| DQ701296 | 0 | 0.00 |  |
| DQ701325 | 0 | 0.00 |  |
| DQ701380 | 0 | 0.00 |  |
| DQ701393 | 0 | 0.00 |  |
| DQ701397 | 0 | 0.00 |  |
| DQ701432 | 0 | 0.00 |  |
| DQ701434 | 0 | 0.00 |  |
| DQ701447 | 0 | 0.00 |  |
| DQ701448 | 0 | 0.00 |  |
| DQ701498 | 0 | 0.00 |  |
| DQ701507 | 0 | 0.00 |  |
| DQ701531 | 0 | 0.00 |  |
| DQ701542 | 0 | 0.00 |  |
| DQ701554 | 0 | 0.00 |  |
| DQ701556 | 0 | 0.00 |  |
| DQ701600 | 0 | 0.00 |  |
| DQ701617 | 0 | 0.00 |  |
| DQ701642 | 0 | 0.00 |  |
| DQ701654 | 0 | 0.00 |  |
| DQ701692 | 0 | 0.00 |  |
| DQ701698 | 0 | 0.00 |  |
| DQ701744 | 0 | 0.00 |  |
| DQ701777 | 0 | 0.00 |  |
| DQ701795 | 0 | 0.00 |  |
| DQ701826 | 0 | 0.00 |  |
| DQ701829 | 0 | 0.00 |  |
| DQ701864 | 0 | 0.00 |  |

|          |   |      |  |
|----------|---|------|--|
| DQ701874 | 0 | 0.00 |  |
| DQ701885 | 0 | 0.00 |  |
| DQ701901 | 0 | 0.00 |  |
| DQ701953 | 0 | 0.00 |  |
| DQ701960 | 0 | 0.00 |  |
| DQ701973 | 0 | 0.00 |  |
| DQ701975 | 0 | 0.00 |  |
| DQ701977 | 0 | 0.00 |  |
| DQ702018 | 0 | 0.00 |  |
| DQ702089 | 0 | 0.00 |  |
| DQ702092 | 0 | 0.00 |  |
| DQ702100 | 0 | 0.00 |  |
| DQ702112 | 0 | 0.00 |  |
| DQ702163 | 0 | 0.00 |  |
| DQ702193 | 0 | 0.00 |  |
| DQ702206 | 0 | 0.00 |  |
| DQ702273 | 0 | 0.00 |  |
| DQ702305 | 0 | 0.00 |  |
| DQ702357 | 0 | 0.00 |  |
| DQ702367 | 0 | 0.00 |  |
| DQ702372 | 0 | 0.00 |  |
| DQ702374 | 0 | 0.00 |  |
| DQ702375 | 0 | 0.00 |  |
| DQ702386 | 0 | 0.00 |  |
| DQ702426 | 0 | 0.00 |  |
| DQ702453 | 0 | 0.00 |  |
| DQ702458 | 0 | 0.00 |  |
| DQ702468 | 0 | 0.00 |  |
| DQ702483 | 0 | 0.00 |  |
| DQ702512 | 0 | 0.00 |  |
| DQ702516 | 0 | 0.00 |  |
| DQ702540 | 0 | 0.00 |  |
| DQ702558 | 0 | 0.00 |  |
| DQ702571 | 0 | 0.00 |  |
| DQ702572 | 0 | 0.00 |  |
| DQ702575 | 0 | 0.00 |  |
| DQ702585 | 0 | 0.00 |  |
| DQ702589 | 0 | 0.00 |  |
| DQ702609 | 0 | 0.00 |  |
| DQ702610 | 0 | 0.00 |  |
| DQ702619 | 0 | 0.00 |  |
| DQ702678 | 0 | 0.00 |  |
| DQ702689 | 0 | 0.00 |  |
| DQ702697 | 0 | 0.00 |  |
| DQ702754 | 0 | 0.00 |  |
| DQ702757 | 0 | 0.00 |  |
| DQ702783 | 0 | 0.00 |  |

|          |          |      |      |
|----------|----------|------|------|
| DQ702854 | 0        | 0.00 |      |
| DQ702868 | 0        | 0.00 |      |
| DQ702910 | 0        | 0.00 |      |
| DQ702916 | 0        | 0.00 |      |
| DQ702922 | 0        | 0.00 |      |
| DQ702961 | 0        | 0.00 |      |
| DQ702968 | 0        | 0.00 |      |
| DQ702976 | 0        | 0.00 |      |
| DQ702978 | 0        | 0.00 |      |
| DQ703000 | 0        | 0.00 |      |
| DQ703005 | 0        | 0.00 |      |
| DQ703017 | 0        | 0.00 |      |
| DQ703018 | 0        | 0.00 |      |
| DQ703023 | 0        | 0.00 |      |
| DQ703049 | 0        | 0.00 |      |
| DQ703057 | 0        | 0.00 |      |
| DQ703064 | 0        | 0.00 |      |
| DQ703065 | 0        | 0.00 |      |
| DQ703082 | 0        | 0.00 |      |
| DQ703105 | 0        | 0.00 |      |
| DQ703168 | 0        | 0.00 |      |
| DQ703267 | 0        | 0.00 |      |
| DQ703299 | 0        | 0.00 |      |
| DQ703302 | 0        | 0.00 |      |
| DQ703331 | 0        | 0.00 |      |
| DQ703338 | 0        | 0.00 |      |
| DQ703340 | 0        | 0.00 |      |
| DQ703376 | 0        | 0.00 |      |
| DQ703386 | 0        | 0.00 |      |
| DQ703407 | 0        | 0.00 |      |
| DQ703419 | 0        | 0.00 |      |
| DQ703520 | 0        | 0.00 |      |
| DQ703566 | 11.97146 | 0.61 | 5.1% |
| DQ703578 | 0        | 0.00 |      |
| DQ703591 | 0        | 0.00 |      |
| DQ703595 | 0        | 0.00 |      |
| DQ703598 | 0        | 0.00 |      |
| DQ703605 | 0        | 0.00 |      |
| DQ703657 | 0        | 0.00 |      |
| DQ703690 | 0        | 0.00 |      |
| DQ703701 | 0        | 0.00 |      |
| DQ703766 | 0        | 0.00 |      |
| DQ703862 | 0        | 0.00 |      |
| DQ703878 | 0        | 0.00 |      |
| DQ703907 | 0        | 0.00 |      |
| DQ703913 | 0        | 0.00 |      |
| DQ703915 | 0        | 0.00 |      |

|          |   |      |  |
|----------|---|------|--|
| DQ703942 | 0 | 0.00 |  |
| DQ703943 | 0 | 0.00 |  |
| DQ703967 | 0 | 0.00 |  |
| DQ703976 | 0 | 0.00 |  |
| DQ703994 | 0 | 0.00 |  |
| DQ704010 | 0 | 0.00 |  |
| DQ704011 | 0 | 0.00 |  |
| DQ704037 | 0 | 0.00 |  |
| DQ704048 | 0 | 0.00 |  |
| DQ704059 | 0 | 0.00 |  |
| DQ704065 | 0 | 0.00 |  |
| DQ704074 | 0 | 0.00 |  |
| DQ704082 | 0 | 0.00 |  |
| DQ704103 | 0 | 0.00 |  |
| DQ704143 | 0 | 0.00 |  |
| DQ704149 | 0 | 0.00 |  |
| DQ704153 | 0 | 0.00 |  |
| DQ704177 | 0 | 0.00 |  |
| DQ704230 | 0 | 0.00 |  |
| DQ704256 | 0 | 0.00 |  |
| DQ704262 | 0 | 0.00 |  |
| DQ704275 | 0 | 0.00 |  |
| DQ704289 | 0 | 0.00 |  |
| DQ704356 | 0 | 0.00 |  |
| DQ704374 | 0 | 0.00 |  |
| DQ704415 | 0 | 0.00 |  |
| DQ704437 | 0 | 0.00 |  |
| DQ704442 | 0 | 0.00 |  |
| DQ704447 | 0 | 0.00 |  |
| DQ704454 | 0 | 0.00 |  |
| DQ704470 | 0 | 0.00 |  |
| DQ704514 | 0 | 0.00 |  |
| DQ704526 | 0 | 0.00 |  |
| DQ704530 | 0 | 0.00 |  |
| DQ704550 | 0 | 0.00 |  |
| DQ704553 | 0 | 0.00 |  |
| DQ704574 | 0 | 0.00 |  |
| DQ704580 | 0 | 0.00 |  |
| DQ704607 | 0 | 0.00 |  |
| DQ704627 | 0 | 0.00 |  |
| DQ704629 | 0 | 0.00 |  |
| DQ704650 | 0 | 0.00 |  |
| DQ704652 | 0 | 0.00 |  |
| DQ704661 | 0 | 0.00 |  |
| DQ704682 | 0 | 0.00 |  |
| DQ704690 | 0 | 0.00 |  |
| DQ704723 | 0 | 0.00 |  |

|          |   |      |  |
|----------|---|------|--|
| DQ704729 | 0 | 0.00 |  |
| DQ704761 | 0 | 0.00 |  |
| DQ704763 | 0 | 0.00 |  |
| DQ704796 | 0 | 0.00 |  |
| DQ704807 | 0 | 0.00 |  |
| DQ704809 | 0 | 0.00 |  |
| DQ704816 | 0 | 0.00 |  |
| DQ704842 | 0 | 0.00 |  |
| DQ704849 | 0 | 0.00 |  |
| DQ704887 | 0 | 0.00 |  |
| DQ704895 | 0 | 0.00 |  |
| DQ704903 | 0 | 0.00 |  |
| DQ704925 | 0 | 0.00 |  |
| DQ704975 | 0 | 0.00 |  |
| DQ705008 | 0 | 0.00 |  |
| DQ705017 | 0 | 0.00 |  |
| DQ705021 | 0 | 0.00 |  |
| DQ705033 | 0 | 0.00 |  |
| DQ705035 | 0 | 0.00 |  |
| DQ705092 | 0 | 0.00 |  |
| DQ705113 | 0 | 0.00 |  |
| DQ705124 | 0 | 0.00 |  |
| DQ705130 | 0 | 0.00 |  |
| DQ705171 | 0 | 0.00 |  |
| DQ705175 | 0 | 0.00 |  |
| DQ705200 | 0 | 0.00 |  |
| DQ705208 | 0 | 0.00 |  |
| DQ705218 | 0 | 0.00 |  |
| DQ705222 | 0 | 0.00 |  |
| DQ705271 | 0 | 0.00 |  |
| DQ705335 | 0 | 0.00 |  |
| DQ705359 | 0 | 0.00 |  |
| DQ705419 | 0 | 0.00 |  |
| DQ705435 | 0 | 0.00 |  |
| DQ705523 | 0 | 0.00 |  |
| DQ705537 | 0 | 0.00 |  |
| DQ705542 | 0 | 0.00 |  |
| DQ705564 | 0 | 0.00 |  |
| DQ705566 | 0 | 0.00 |  |
| DQ705597 | 0 | 0.00 |  |
| DQ705620 | 0 | 0.00 |  |
| DQ705640 | 0 | 0.00 |  |
| DQ705642 | 0 | 0.00 |  |
| DQ705652 | 0 | 0.00 |  |
| DQ705702 | 0 | 0.00 |  |
| DQ705726 | 0 | 0.00 |  |
| DQ705727 | 0 | 0.00 |  |

|          |   |      |  |
|----------|---|------|--|
| DQ705769 | 0 | 0.00 |  |
| DQ705824 | 0 | 0.00 |  |
| DQ705847 | 0 | 0.00 |  |
| DQ705849 | 0 | 0.00 |  |
| DQ705860 | 0 | 0.00 |  |
| DQ705864 | 0 | 0.00 |  |
| DQ705865 | 0 | 0.00 |  |
| DQ705881 | 0 | 0.00 |  |
| DQ705886 | 0 | 0.00 |  |
| DQ705896 | 0 | 0.00 |  |
| DQ705898 | 0 | 0.00 |  |
| DQ705907 | 0 | 0.00 |  |
| DQ705922 | 0 | 0.00 |  |
| DQ705927 | 0 | 0.00 |  |
| DQ705933 | 0 | 0.00 |  |
| DQ706009 | 0 | 0.00 |  |
| DQ706020 | 0 | 0.00 |  |
| DQ706036 | 0 | 0.00 |  |
| DQ706049 | 0 | 0.00 |  |
| DQ706062 | 0 | 0.00 |  |
| DQ706069 | 0 | 0.00 |  |
| DQ706101 | 0 | 0.00 |  |
| DQ706115 | 0 | 0.00 |  |
| DQ706116 | 0 | 0.00 |  |
| DQ706140 | 0 | 0.00 |  |
| DQ706153 | 0 | 0.00 |  |
| DQ706172 | 0 | 0.00 |  |
| DQ706175 | 0 | 0.00 |  |
| DQ706184 | 0 | 0.00 |  |
| DQ706185 | 0 | 0.00 |  |
| DQ706219 | 0 | 0.00 |  |
| DQ706243 | 0 | 0.00 |  |
| DQ706266 | 0 | 0.00 |  |
| DQ706333 | 0 | 0.00 |  |
| DQ706335 | 0 | 0.00 |  |
| DQ706336 | 0 | 0.00 |  |
| DQ706369 | 0 | 0.00 |  |
| DQ706373 | 0 | 0.00 |  |
| DQ706374 | 0 | 0.00 |  |
| DQ706406 | 0 | 0.00 |  |
| DQ706458 | 0 | 0.00 |  |
| DQ706459 | 0 | 0.00 |  |
| DQ706488 | 0 | 0.00 |  |
| DQ706494 | 0 | 0.00 |  |
| DQ706499 | 0 | 0.00 |  |
| DQ706509 | 0 | 0.00 |  |
| DQ706510 | 0 | 0.00 |  |

|          |   |      |  |
|----------|---|------|--|
| DQ706519 | 0 | 0.00 |  |
| DQ706549 | 0 | 0.00 |  |
| DQ706580 | 0 | 0.00 |  |
| DQ706582 | 0 | 0.00 |  |
| DQ706644 | 0 | 0.00 |  |
| DQ706648 | 0 | 0.00 |  |
| DQ706703 | 0 | 0.00 |  |
| DQ706720 | 0 | 0.00 |  |
| DQ706722 | 0 | 0.00 |  |
| DQ706843 | 0 | 0.00 |  |
| DQ706864 | 0 | 0.00 |  |
| DQ706890 | 0 | 0.00 |  |
| DQ706910 | 0 | 0.00 |  |
| DQ706931 | 0 | 0.00 |  |
| DQ706969 | 0 | 0.00 |  |
| DQ706974 | 0 | 0.00 |  |
| DQ706995 | 0 | 0.00 |  |
| DQ707012 | 0 | 0.00 |  |
| DQ707019 | 0 | 0.00 |  |
| DQ707024 | 0 | 0.00 |  |
| DQ707045 | 0 | 0.00 |  |
| DQ707051 | 0 | 0.00 |  |
| DQ707078 | 0 | 0.00 |  |
| DQ707179 | 0 | 0.00 |  |
| DQ707199 | 0 | 0.00 |  |
| DQ707201 | 0 | 0.00 |  |
| DQ707213 | 0 | 0.00 |  |
| DQ707224 | 0 | 0.00 |  |
| DQ707240 | 0 | 0.00 |  |
| DQ707248 | 0 | 0.00 |  |
| DQ707250 | 0 | 0.00 |  |
| DQ707267 | 0 | 0.00 |  |
| DQ707271 | 0 | 0.00 |  |
| DQ707295 | 0 | 0.00 |  |
| DQ707303 | 0 | 0.00 |  |
| DQ707315 | 0 | 0.00 |  |
| DQ707320 | 0 | 0.00 |  |
| DQ707326 | 0 | 0.00 |  |
| DQ707327 | 0 | 0.00 |  |
| DQ707353 | 0 | 0.00 |  |
| DQ707380 | 0 | 0.00 |  |
| DQ707400 | 0 | 0.00 |  |
| DQ707403 | 0 | 0.00 |  |
| DQ707409 | 0 | 0.00 |  |
| DQ707432 | 0 | 0.00 |  |
| DQ707450 | 0 | 0.00 |  |
| DQ707477 | 0 | 0.00 |  |



|          |   |      |  |
|----------|---|------|--|
| DQ707526 | 0 | 0.00 |  |
| DQ707556 | 0 | 0.00 |  |
| DQ707564 | 0 | 0.00 |  |
| DQ707569 | 0 | 0.00 |  |
| DQ707575 | 0 | 0.00 |  |
| DQ707587 | 0 | 0.00 |  |
| DQ707596 | 0 | 0.00 |  |
| DQ707628 | 0 | 0.00 |  |
| DQ707640 | 0 | 0.00 |  |
| DQ707670 | 0 | 0.00 |  |
| DQ707675 | 0 | 0.00 |  |
| DQ707678 | 0 | 0.00 |  |
| DQ707708 | 0 | 0.00 |  |
| DQ707709 | 0 | 0.00 |  |
| DQ707711 | 0 | 0.00 |  |
| DQ707714 | 0 | 0.00 |  |
| DQ707749 | 0 | 0.00 |  |
| DQ707763 | 0 | 0.00 |  |
| DQ707789 | 0 | 0.00 |  |
| DQ707872 | 0 | 0.00 |  |
| DQ707882 | 0 | 0.00 |  |
| DQ707901 | 0 | 0.00 |  |
| DQ707909 | 0 | 0.00 |  |
| DQ707913 | 0 | 0.00 |  |
| DQ707915 | 0 | 0.00 |  |
| DQ707920 | 0 | 0.00 |  |
| DQ707969 | 0 | 0.00 |  |
| DQ707980 | 0 | 0.00 |  |
| DQ708001 | 0 | 0.00 |  |
| DQ708007 | 0 | 0.00 |  |
| DQ708019 | 0 | 0.00 |  |
| DQ708036 | 0 | 0.00 |  |
| DQ708063 | 0 | 0.00 |  |
| DQ708067 | 0 | 0.00 |  |
| DQ708075 | 0 | 0.00 |  |
| DQ708091 | 0 | 0.00 |  |
| DQ708189 | 0 | 0.00 |  |
| DQ708201 | 0 | 0.00 |  |
| DQ708205 | 0 | 0.00 |  |
| DQ708234 | 0 | 0.00 |  |
| DQ708250 | 0 | 0.00 |  |
| DQ708288 | 0 | 0.00 |  |
| DQ708292 | 0 | 0.00 |  |
| DQ708300 | 0 | 0.00 |  |
| DQ708318 | 0 | 0.00 |  |
| DQ708335 | 0 | 0.00 |  |
| DQ708345 | 0 | 0.00 |  |

|          |          |      |      |
|----------|----------|------|------|
| DQ708362 | 0        | 0.00 |      |
| DQ708409 | 0        | 0.00 |      |
| DQ708450 | 0        | 0.00 |      |
| DQ708476 | 0        | 0.00 |      |
| DQ708492 | 0        | 0.00 |      |
| DQ708497 | 0        | 0.00 |      |
| DQ708505 | 0        | 0.00 |      |
| DQ708512 | 0        | 0.00 |      |
| DQ708570 | 0        | 0.00 |      |
| DQ708574 | 0        | 0.00 |      |
| DQ708589 | 0        | 0.00 |      |
| DQ708637 | 0        | 0.00 |      |
| DQ708654 | 0        | 0.00 |      |
| DQ708683 | 0        | 0.00 |      |
| DQ708686 | 0        | 0.00 |      |
| DQ708697 | 0        | 0.00 |      |
| DQ708698 | 0        | 0.00 |      |
| DQ708713 | 0        | 0.00 |      |
| DQ708714 | 0        | 0.00 |      |
| DQ708719 | 0        | 0.00 |      |
| DQ708724 | 0        | 0.00 |      |
| DQ708735 | 0        | 0.00 |      |
| DQ708760 | 0        | 0.00 |      |
| DQ708778 | 0        | 0.00 |      |
| DQ708782 | 0        | 0.00 |      |
| DQ708858 | 0        | 0.00 |      |
| DQ708880 | 0        | 0.00 |      |
| DQ708892 | 0        | 0.00 |      |
| DQ708916 | 0        | 0.00 |      |
| DQ708924 | 38.09332 | 2.10 | 5.5% |
| DQ708946 | 0        | 0.00 |      |
| DQ708963 | 0        | 0.00 |      |
| DQ708973 | 0        | 0.00 |      |
| DQ708976 | 0        | 0.00 |      |
| DQ708984 | 0        | 0.00 |      |
| DQ708993 | 0        | 0.00 |      |
| DQ709019 | 0        | 0.00 |      |
| DQ709035 | 0        | 0.00 |      |
| DQ709048 | 0        | 0.00 |      |
| DQ709050 | 0        | 0.00 |      |
| DQ709054 | 0        | 0.00 |      |
| DQ709101 | 0        | 0.00 |      |
| DQ709102 | 0        | 0.00 |      |
| DQ709133 | 0        | 0.00 |      |
| DQ709135 | 0        | 0.00 |      |
| DQ709154 | 0        | 0.00 |      |
| DQ709165 | 0        | 0.00 |      |

|          |   |      |  |
|----------|---|------|--|
| DQ709175 | 0 | 0.00 |  |
| DQ709177 | 0 | 0.00 |  |
| DQ709199 | 0 | 0.00 |  |
| DQ709229 | 0 | 0.00 |  |
| DQ709247 | 0 | 0.00 |  |
| DQ709308 | 0 | 0.00 |  |
| DQ709329 | 0 | 0.00 |  |
| DQ709334 | 0 | 0.00 |  |
| DQ709345 | 0 | 0.00 |  |
| DQ709401 | 0 | 0.00 |  |
| DQ709404 | 0 | 0.00 |  |
| DQ709433 | 0 | 0.00 |  |
| DQ709488 | 0 | 0.00 |  |
| DQ709491 | 0 | 0.00 |  |
| DQ709495 | 0 | 0.00 |  |
| DQ709498 | 0 | 0.00 |  |
| DQ709520 | 0 | 0.00 |  |
| DQ709549 | 0 | 0.00 |  |
| DQ709581 | 0 | 0.00 |  |
| DQ709607 | 0 | 0.00 |  |
| DQ709610 | 0 | 0.00 |  |
| DQ709611 | 0 | 0.00 |  |
| DQ709618 | 0 | 0.00 |  |
| DQ709620 | 0 | 0.00 |  |
| DQ709682 | 0 | 0.00 |  |
| DQ709686 | 0 | 0.00 |  |
| DQ709694 | 0 | 0.00 |  |
| DQ709708 | 0 | 0.00 |  |
| DQ709712 | 0 | 0.00 |  |
| DQ709738 | 0 | 0.00 |  |
| DQ709752 | 0 | 0.00 |  |
| DQ709755 | 0 | 0.00 |  |
| DQ709773 | 0 | 0.00 |  |
| DQ709778 | 0 | 0.00 |  |
| DQ709965 | 0 | 0.00 |  |
| DQ709984 | 0 | 0.00 |  |
| DQ709996 | 0 | 0.00 |  |
| DQ710007 | 0 | 0.00 |  |
| DQ710034 | 0 | 0.00 |  |
| DQ710056 | 0 | 0.00 |  |
| DQ710076 | 0 | 0.00 |  |
| DQ710118 | 0 | 0.00 |  |
| DQ710126 | 0 | 0.00 |  |
| DQ710144 | 0 | 0.00 |  |
| DQ710167 | 0 | 0.00 |  |
| DQ710175 | 0 | 0.00 |  |
| DQ710195 | 0 | 0.00 |  |

|          |           |      |       |
|----------|-----------|------|-------|
| DQ710218 | 0         | 0.00 |       |
| DQ710249 | 0         | 0.00 |       |
| DQ710257 | 0         | 0.00 |       |
| DQ710318 | 0         | 0.00 |       |
| DQ710326 | 0         | 0.00 |       |
| DQ710343 | 0         | 0.00 |       |
| DQ710344 | 0         | 0.00 |       |
| DQ710350 | 0         | 0.00 |       |
| DQ710363 | 0         | 0.00 |       |
| DQ710385 | 0         | 0.00 |       |
| DQ710427 | 0         | 0.00 |       |
| DQ710443 | 0         | 0.00 |       |
| DQ710451 | 0         | 0.00 |       |
| DQ710533 | 0         | 0.00 |       |
| DQ710605 | 0         | 0.00 |       |
| DQ710611 | 0         | 0.00 |       |
| DQ710622 | 0         | 0.00 |       |
| DQ710663 | 0         | 0.00 |       |
| DQ710664 | 0         | 0.00 |       |
| DQ710678 | 0         | 0.00 |       |
| DQ710713 | 0         | 0.00 |       |
| DQ710722 | 0         | 0.00 |       |
| DQ710745 | 0         | 0.00 |       |
| DQ710769 | 0         | 0.00 |       |
| DQ710791 | 0         | 0.00 |       |
| DQ710812 | 0         | 0.00 |       |
| DQ710814 | 0         | 0.00 |       |
| DQ710816 | 0         | 0.00 |       |
| DQ710826 | 0         | 0.00 |       |
| DQ710884 | 0         | 0.00 |       |
| DQ710894 | 0         | 0.00 |       |
| DQ710901 | 0         | 0.00 |       |
| DQ710937 | 0         | 0.00 |       |
| DQ710940 | 0         | 0.00 |       |
| DQ710955 | 0         | 0.00 |       |
| DQ711019 | 0.8608106 | 0.32 | 37.2% |
| DQ711072 | 0         | 0.00 |       |
| DQ711089 | 0         | 0.00 |       |
| DQ711111 | 0         | 0.00 |       |
| DQ711149 | 0         | 0.00 |       |
| DQ711159 | 0         | 0.00 |       |
| DQ711162 | 0         | 0.00 |       |
| DQ711171 | 0         | 0.00 |       |
| DQ711172 | 0         | 0.00 |       |
| DQ711183 | 0         | 0.00 |       |
| DQ711199 | 0         | 0.00 |       |
| DQ711212 | 0         | 0.00 |       |

|          |          |      |      |
|----------|----------|------|------|
| DQ711233 | 0        | 0.00 |      |
| DQ711256 | 0        | 0.00 |      |
| DQ711269 | 0        | 0.00 |      |
| DQ711271 | 0        | 0.00 |      |
| DQ711282 | 0        | 0.00 |      |
| DQ711310 | 0        | 0.00 |      |
| DQ711315 | 0        | 0.00 |      |
| DQ711333 | 0        | 0.00 |      |
| DQ711353 | 0        | 0.00 |      |
| DQ711354 | 0        | 0.00 |      |
| DQ711387 | 0        | 0.00 |      |
| DQ711393 | 0        | 0.00 |      |
| DQ711460 | 0        | 0.00 |      |
| DQ711473 | 0        | 0.00 |      |
| DQ711486 | 0        | 0.00 |      |
| DQ711501 | 0        | 0.00 |      |
| DQ711508 | 0        | 0.00 |      |
| DQ711509 | 0        | 0.00 |      |
| DQ711515 | 0        | 0.00 |      |
| DQ711524 | 0        | 0.00 |      |
| DQ711529 | 0        | 0.00 |      |
| DQ711544 | 0        | 0.00 |      |
| DQ711552 | 0        | 0.00 |      |
| DQ711560 | 0        | 0.00 |      |
| DQ711584 | 0        | 0.00 |      |
| DQ711604 | 0        | 0.00 |      |
| DQ711633 | 0        | 0.00 |      |
| DQ711646 | 0        | 0.00 |      |
| DQ711659 | 0        | 0.00 |      |
| DQ711691 | 0        | 0.00 |      |
| DQ711745 | 0        | 0.00 |      |
| DQ711818 | 0        | 0.00 |      |
| DQ711851 | 0        | 0.00 |      |
| DQ711897 | 0        | 0.00 |      |
| DQ711916 | 0        | 0.00 |      |
| DQ711917 | 0        | 0.00 |      |
| DQ711921 | 0        | 0.00 |      |
| DQ711929 | 0        | 0.00 |      |
| DQ711953 | 2.358482 | 0.16 | 6.6% |
| DQ711975 | 0        | 0.00 |      |
| DQ712012 | 0        | 0.00 |      |
| DQ712046 | 0        | 0.00 |      |
| DQ712055 | 0        | 0.00 |      |
| DQ712071 | 0        | 0.00 |      |
| DQ712092 | 0        | 0.00 |      |
| DQ712111 | 0        | 0.00 |      |
| DQ712122 | 0        | 0.00 |      |

|          |          |      |      |
|----------|----------|------|------|
| DQ712160 | 0        | 0.00 |      |
| DQ712179 | 0        | 0.00 |      |
| DQ712184 | 0        | 0.00 |      |
| DQ712213 | 0        | 0.00 |      |
| DQ712214 | 0        | 0.00 |      |
| DQ712273 | 0        | 0.00 |      |
| DQ712296 | 0        | 0.00 |      |
| DQ712343 | 0        | 0.00 |      |
| DQ712360 | 0        | 0.00 |      |
| DQ712368 | 0        | 0.00 |      |
| DQ712376 | 0        | 0.00 |      |
| DQ712402 | 0        | 0.00 |      |
| DQ712420 | 0        | 0.00 |      |
| DQ712497 | 0        | 0.00 |      |
| DQ712503 | 0        | 0.00 |      |
| DQ712520 | 0        | 0.00 |      |
| DQ712548 | 0        | 0.00 |      |
| DQ712556 | 3.600364 | 0.33 | 9.1% |
| DQ712560 | 0        | 0.00 |      |
| DQ712603 | 0        | 0.00 |      |
| DQ712628 | 0        | 0.00 |      |
| DQ712774 | 0        | 0.00 |      |
| DQ712777 | 0        | 0.00 |      |
| DQ712790 | 0        | 0.00 |      |
| DQ712794 | 0        | 0.00 |      |
| DQ712803 | 0        | 0.00 |      |
| DQ712809 | 0        | 0.00 |      |
| DQ712810 | 0        | 0.00 |      |
| DQ712878 | 0        | 0.00 |      |
| DQ712887 | 0        | 0.00 |      |
| DQ712890 | 0        | 0.00 |      |
| DQ712916 | 0        | 0.00 |      |
| DQ712917 | 0        | 0.00 |      |
| DQ712936 | 0        | 0.00 |      |
| DQ712948 | 0        | 0.00 |      |
| DQ713008 | 0        | 0.00 |      |
| DQ713015 | 0        | 0.00 |      |
| DQ713034 | 0        | 0.00 |      |
| DQ713064 | 0        | 0.00 |      |
| DQ713076 | 0        | 0.00 |      |
| DQ713079 | 0        | 0.00 |      |
| DQ713163 | 0        | 0.00 |      |
| DQ713197 | 0        | 0.00 |      |
| DQ713227 | 0        | 0.00 |      |
| DQ713276 | 0        | 0.00 |      |
| DQ713287 | 0        | 0.00 |      |
| DQ713310 | 0        | 0.00 |      |

|          |   |      |  |
|----------|---|------|--|
| DQ713313 | 0 | 0.00 |  |
| DQ713375 | 0 | 0.00 |  |
| DQ713407 | 0 | 0.00 |  |
| DQ713414 | 0 | 0.00 |  |
| DQ713442 | 0 | 0.00 |  |
| DQ713456 | 0 | 0.00 |  |
| DQ713459 | 0 | 0.00 |  |
| DQ713469 | 0 | 0.00 |  |
| DQ713505 | 0 | 0.00 |  |
| DQ713519 | 0 | 0.00 |  |
| DQ713526 | 0 | 0.00 |  |
| DQ713539 | 0 | 0.00 |  |
| DQ713546 | 0 | 0.00 |  |
| DQ713554 | 0 | 0.00 |  |
| DQ713582 | 0 | 0.00 |  |
| DQ713604 | 0 | 0.00 |  |
| DQ713653 | 0 | 0.00 |  |
| DQ713654 | 0 | 0.00 |  |
| DQ713678 | 0 | 0.00 |  |
| DQ713701 | 0 | 0.00 |  |
| DQ713721 | 0 | 0.00 |  |
| DQ713732 | 0 | 0.00 |  |
| DQ713814 | 0 | 0.00 |  |
| DQ713846 | 0 | 0.00 |  |
| DQ713888 | 0 | 0.00 |  |
| DQ713954 | 0 | 0.00 |  |
| DQ713958 | 0 | 0.00 |  |
| DQ713959 | 0 | 0.00 |  |
| DQ713967 | 0 | 0.00 |  |
| DQ713989 | 0 | 0.00 |  |
| DQ714076 | 0 | 0.00 |  |
| DQ714108 | 0 | 0.00 |  |
| DQ714171 | 0 | 0.00 |  |
| DQ714183 | 0 | 0.00 |  |
| DQ714193 | 0 | 0.00 |  |
| DQ714220 | 0 | 0.00 |  |
| DQ714222 | 0 | 0.00 |  |
| DQ714285 | 0 | 0.00 |  |
| DQ714298 | 0 | 0.00 |  |
| DQ714309 | 0 | 0.00 |  |
| DQ714346 | 0 | 0.00 |  |
| DQ714356 | 0 | 0.00 |  |
| DQ714381 | 0 | 0.00 |  |
| DQ714398 | 0 | 0.00 |  |
| DQ714413 | 0 | 0.00 |  |
| DQ714420 | 0 | 0.00 |  |
| DQ714446 | 0 | 0.00 |  |

|          |   |      |  |
|----------|---|------|--|
| DQ714447 | 0 | 0.00 |  |
| DQ714455 | 0 | 0.00 |  |
| DQ714499 | 0 | 0.00 |  |
| DQ714525 | 0 | 0.00 |  |
| DQ714579 | 0 | 0.00 |  |
| DQ714600 | 0 | 0.00 |  |
| DQ714612 | 0 | 0.00 |  |
| DQ714635 | 0 | 0.00 |  |
| DQ714645 | 0 | 0.00 |  |
| DQ714646 | 0 | 0.00 |  |
| DQ714658 | 0 | 0.00 |  |
| DQ714716 | 0 | 0.00 |  |
| DQ714762 | 0 | 0.00 |  |
| DQ714775 | 0 | 0.00 |  |
| DQ714790 | 0 | 0.00 |  |
| DQ714799 | 0 | 0.00 |  |
| DQ714803 | 0 | 0.00 |  |
| DQ714811 | 0 | 0.00 |  |
| DQ714826 | 0 | 0.00 |  |
| DQ714852 | 0 | 0.00 |  |
| DQ714866 | 0 | 0.00 |  |
| DQ714868 | 0 | 0.00 |  |
| DQ714893 | 0 | 0.00 |  |
| DQ714940 | 0 | 0.00 |  |
| DQ714985 | 0 | 0.00 |  |
| DQ715046 | 0 | 0.00 |  |
| DQ715063 | 0 | 0.00 |  |
| DQ715077 | 0 | 0.00 |  |
| DQ715099 | 0 | 0.00 |  |
| DQ715157 | 0 | 0.00 |  |
| DQ715174 | 0 | 0.00 |  |
| DQ715195 | 0 | 0.00 |  |
| DQ715231 | 0 | 0.00 |  |
| DQ715236 | 0 | 0.00 |  |
| DQ715243 | 0 | 0.00 |  |
| DQ715268 | 0 | 0.00 |  |
| DQ715271 | 0 | 0.00 |  |
| DQ715292 | 0 | 0.00 |  |
| DQ715309 | 0 | 0.00 |  |
| DQ715325 | 0 | 0.00 |  |
| DQ715333 | 0 | 0.00 |  |
| DQ715352 | 0 | 0.00 |  |
| DQ715402 | 0 | 0.00 |  |
| DQ715404 | 0 | 0.00 |  |
| DQ715410 | 0 | 0.00 |  |
| DQ715413 | 0 | 0.00 |  |
| DQ715421 | 0 | 0.00 |  |



|          |            |      |       |
|----------|------------|------|-------|
| DQ715424 | 0          | 0.00 |       |
| DQ715437 | 0          | 0.00 |       |
| DQ715484 | 0          | 0.00 |       |
| DQ715509 | 0          | 0.00 |       |
| DQ715510 | 0          | 0.00 |       |
| DQ715521 | 0          | 0.00 |       |
| DQ715522 | 0          | 0.00 |       |
| DQ715551 | 0          | 0.00 |       |
| DQ715562 | 0          | 0.00 |       |
| DQ715600 | 0          | 0.00 |       |
| DQ715649 | 0          | 0.00 |       |
| DQ715667 | 30.58754   | 2.60 | 8.5%  |
| DQ715668 | 0          | 0.00 |       |
| DQ715729 | 0.12547992 | 0.05 | 38.7% |
| DQ715731 | 0          | 0.00 |       |
| DQ715735 | 0          | 0.00 |       |
| DQ715767 | 0          | 0.00 |       |
| DQ715779 | 0          | 0.00 |       |
| DQ715789 | 0          | 0.00 |       |
| DQ715816 | 0          | 0.00 |       |
| DQ715827 | 0          | 0.00 |       |
| DQ715831 | 0          | 0.00 |       |
| DQ715854 | 0          | 0.00 |       |
| DQ715856 | 0          | 0.00 |       |
| DQ715862 | 0          | 0.00 |       |
| DQ715869 | 0          | 0.00 |       |
| DQ715910 | 0          | 0.00 |       |
| DQ715911 | 0          | 0.00 |       |
| DQ715921 | 0          | 0.00 |       |
| DQ715968 | 0          | 0.00 |       |
| DQ715973 | 17.10406   | 0.60 | 3.5%  |
| DQ716012 | 0          | 0.00 |       |
| DQ716014 | 0          | 0.00 |       |
| DQ716022 | 0          | 0.00 |       |
| DQ716029 | 0          | 0.00 |       |
| DQ716032 | 0          | 0.00 |       |
| DQ716085 | 0          | 0.00 |       |
| DQ716099 | 0          | 0.00 |       |
| DQ716102 | 0          | 0.00 |       |
| DQ716115 | 0          | 0.00 |       |
| DQ716137 | 0          | 0.00 |       |
| DQ716191 | 0          | 0.00 |       |
| DQ716236 | 0          | 0.00 |       |
| DQ716259 | 0          | 0.00 |       |
| DQ716264 | 0          | 0.00 |       |
| DQ716288 | 0          | 0.00 |       |
| DQ716308 | 0          | 0.00 |       |

|          |         |      |      |
|----------|---------|------|------|
| DQ716338 | 0       | 0.00 |      |
| DQ716352 | 0       | 0.00 |      |
| DQ716374 | 0       | 0.00 |      |
| DQ716375 | 0       | 0.00 |      |
| DQ716404 | 0       | 0.00 |      |
| DQ716425 | 0       | 0.00 |      |
| DQ716436 | 12.6241 | 0.78 | 6.1% |
| DQ716443 | 0       | 0.00 |      |
| DQ716500 | 0       | 0.00 |      |
| DQ716522 | 0       | 0.00 |      |
| DQ716540 | 0       | 0.00 |      |
| DQ716549 | 0       | 0.00 |      |
| DQ716579 | 0       | 0.00 |      |
| DQ716625 | 0       | 0.00 |      |
| DQ716653 | 0       | 0.00 |      |
| DQ716672 | 0       | 0.00 |      |
| DQ716682 | 0       | 0.00 |      |
| DQ716692 | 0       | 0.00 |      |
| DQ716699 | 0       | 0.00 |      |
| DQ716700 | 0       | 0.00 |      |
| DQ716701 | 0       | 0.00 |      |
| DQ716714 | 0       | 0.00 |      |
| DQ716732 | 0       | 0.00 |      |
| DQ716740 | 0       | 0.00 |      |
| DQ716783 | 0       | 0.00 |      |
| DQ716785 | 0       | 0.00 |      |
| DQ716800 | 0       | 0.00 |      |
| DQ716835 | 0       | 0.00 |      |
| DQ716898 | 0       | 0.00 |      |
| DQ716920 | 0       | 0.00 |      |
| DQ716963 | 0       | 0.00 |      |
| DQ716966 | 0       | 0.00 |      |
| DQ716981 | 0       | 0.00 |      |
| DQ717001 | 0       | 0.00 |      |
| DQ717002 | 0       | 0.00 |      |
| DQ717005 | 0       | 0.00 |      |
| DQ717033 | 0       | 0.00 |      |
| DQ717037 | 0       | 0.00 |      |
| DQ717047 | 0       | 0.00 |      |
| DQ717065 | 0       | 0.00 |      |
| DQ717083 | 0       | 0.00 |      |
| DQ717093 | 0       | 0.00 |      |
| DQ717113 | 0       | 0.00 |      |
| DQ717116 | 0       | 0.00 |      |
| DQ717142 | 0       | 0.00 |      |
| DQ717161 | 0       | 0.00 |      |
| DQ717291 | 0       | 0.00 |      |

|          |          |      |      |
|----------|----------|------|------|
| DQ717301 | 0        | 0.00 |      |
| DQ717333 | 0        | 0.00 |      |
| DQ717340 | 0        | 0.00 |      |
| DQ717357 | 0        | 0.00 |      |
| DQ717383 | 0        | 0.00 |      |
| DQ717414 | 0        | 0.00 |      |
| DQ717522 | 0        | 0.00 |      |
| DQ717549 | 0        | 0.00 |      |
| DQ717559 | 0        | 0.00 |      |
| DQ717560 | 0        | 0.00 |      |
| DQ717569 | 0        | 0.00 |      |
| DQ717580 | 0        | 0.00 |      |
| DQ717620 | 0        | 0.00 |      |
| DQ717630 | 0        | 0.00 |      |
| DQ717633 | 0        | 0.00 |      |
| DQ717665 | 0        | 0.00 |      |
| DQ717692 | 0        | 0.00 |      |
| DQ717693 | 0        | 0.00 |      |
| DQ717704 | 0        | 0.00 |      |
| DQ717768 | 0        | 0.00 |      |
| DQ717824 | 0        | 0.00 |      |
| DQ717831 | 0        | 0.00 |      |
| DQ717863 | 0        | 0.00 |      |
| DQ717868 | 0        | 0.00 |      |
| DQ717871 | 0        | 0.00 |      |
| DQ717888 | 0.901372 | 0.08 | 8.6% |
| DQ717895 | 0        | 0.00 |      |
| DQ717907 | 0        | 0.00 |      |
| DQ717915 | 0        | 0.00 |      |
| DQ717919 | 0        | 0.00 |      |
| DQ717944 | 0        | 0.00 |      |
| DQ717961 | 0        | 0.00 |      |
| DQ717970 | 0        | 0.00 |      |
| DQ717978 | 0        | 0.00 |      |
| DQ717983 | 0        | 0.00 |      |
| DQ717984 | 0        | 0.00 |      |
| DQ717988 | 0        | 0.00 |      |
| DQ718008 | 0        | 0.00 |      |
| DQ718012 | 0        | 0.00 |      |
| DQ718033 | 0        | 0.00 |      |
| DQ718113 | 0        | 0.00 |      |
| DQ718121 | 0        | 0.00 |      |
| DQ718144 | 0        | 0.00 |      |
| DQ718145 | 0        | 0.00 |      |
| DQ718173 | 0        | 0.00 |      |
| DQ718202 | 0        | 0.00 |      |
| DQ718207 | 0        | 0.00 |      |

|          |           |      |        |
|----------|-----------|------|--------|
| DQ718216 | 0         | 0.00 |        |
| DQ718221 | 0         | 0.00 |        |
| DQ718229 | 0         | 0.00 |        |
| DQ718260 | 0         | 0.00 |        |
| DQ718281 | 0         | 0.00 |        |
| DQ718285 | 0         | 0.00 |        |
| DQ718296 | 0         | 0.00 |        |
| DQ718309 | 0         | 0.00 |        |
| DQ718368 | 0         | 0.00 |        |
| DQ718380 | 0         | 0.00 |        |
| DQ718403 | 0         | 0.00 |        |
| DQ718421 | 0         | 0.00 |        |
| DQ718451 | 0         | 0.00 |        |
| DQ718500 | 0         | 0.00 |        |
| DQ718505 | 0         | 0.00 |        |
| DQ718522 | 0         | 0.00 |        |
| DQ718537 | 0.306996  | 0.69 | 223.6% |
| DQ718556 | 0         | 0.00 |        |
| DQ718565 | 0         | 0.00 |        |
| DQ718591 | 0         | 0.00 |        |
| DQ718612 | 0         | 0.00 |        |
| DQ718635 | 0         | 0.00 |        |
| DQ718672 | 0         | 0.00 |        |
| DQ718673 | 0         | 0.00 |        |
| DQ718704 | 0         | 0.00 |        |
| DQ718749 | 0         | 0.00 |        |
| DQ718759 | 0         | 0.00 |        |
| DQ718766 | 1.1589004 | 0.78 | 67.6%  |
| DQ718767 | 0         | 0.00 |        |
| DQ718776 | 0         | 0.00 |        |
| DQ718785 | 0         | 0.00 |        |
| DQ718809 | 0         | 0.00 |        |
| DQ718811 | 0         | 0.00 |        |
| DQ718858 | 0         | 0.00 |        |
| DQ718921 | 0         | 0.00 |        |
| DQ718970 | 0         | 0.00 |        |
| DQ718974 | 0         | 0.00 |        |
| DQ719003 | 0         | 0.00 |        |
| DQ719008 | 0         | 0.00 |        |
| DQ719134 | 0         | 0.00 |        |
| DQ719139 | 0         | 0.00 |        |
| DQ719232 | 0         | 0.00 |        |
| DQ719254 | 0         | 0.00 |        |
| DQ719264 | 0         | 0.00 |        |
| DQ719269 | 0         | 0.00 |        |
| DQ719293 | 0         | 0.00 |        |
| DQ719298 | 0         | 0.00 |        |

|          |   |      |  |
|----------|---|------|--|
| DQ719336 | 0 | 0.00 |  |
| DQ719367 | 0 | 0.00 |  |
| DQ719396 | 0 | 0.00 |  |
| DQ719401 | 0 | 0.00 |  |
| DQ719409 | 0 | 0.00 |  |
| DQ719413 | 0 | 0.00 |  |
| DQ719430 | 0 | 0.00 |  |
| DQ719437 | 0 | 0.00 |  |
| DQ719456 | 0 | 0.00 |  |
| DQ719459 | 0 | 0.00 |  |
| DQ719499 | 0 | 0.00 |  |
| DQ719504 | 0 | 0.00 |  |
| DQ719517 | 0 | 0.00 |  |
| DQ719525 | 0 | 0.00 |  |
| DQ719554 | 0 | 0.00 |  |
| DQ719555 | 0 | 0.00 |  |
| DQ719561 | 0 | 0.00 |  |
| DQ719573 | 0 | 0.00 |  |
| DQ719581 | 0 | 0.00 |  |
| DQ719582 | 0 | 0.00 |  |
| DQ719585 | 0 | 0.00 |  |
| DQ719602 | 0 | 0.00 |  |
| DQ719622 | 0 | 0.00 |  |
| DQ719678 | 0 | 0.00 |  |
| DQ719681 | 0 | 0.00 |  |
| DQ719700 | 0 | 0.00 |  |
| DQ719729 | 0 | 0.00 |  |
| DQ719737 | 0 | 0.00 |  |
| DQ719770 | 0 | 0.00 |  |
| DQ719819 | 0 | 0.00 |  |
| DQ719824 | 0 | 0.00 |  |
| DQ719838 | 0 | 0.00 |  |
| DQ719872 | 0 | 0.00 |  |
| DQ719888 | 0 | 0.00 |  |
| DQ719893 | 0 | 0.00 |  |
| DQ719911 | 0 | 0.00 |  |
| DQ719961 | 0 | 0.00 |  |
| DQ719983 | 0 | 0.00 |  |
| DQ720021 | 0 | 0.00 |  |
| DQ720065 | 0 | 0.00 |  |
| DQ720100 | 0 | 0.00 |  |
| DQ720133 | 0 | 0.00 |  |
| DQ720136 | 0 | 0.00 |  |
| DQ720158 | 0 | 0.00 |  |
| DQ720182 | 0 | 0.00 |  |
| DQ720185 | 0 | 0.00 |  |
| DQ720245 | 0 | 0.00 |  |

|          |   |      |  |
|----------|---|------|--|
| DQ720250 | 0 | 0.00 |  |
| DQ720385 | 0 | 0.00 |  |
| DQ720410 | 0 | 0.00 |  |
| DQ720412 | 0 | 0.00 |  |
| DQ720427 | 0 | 0.00 |  |
| DQ720431 | 0 | 0.00 |  |
| DQ720439 | 0 | 0.00 |  |
| DQ720445 | 0 | 0.00 |  |
| DQ720468 | 0 | 0.00 |  |
| DQ720479 | 0 | 0.00 |  |
| DQ720502 | 0 | 0.00 |  |
| DQ720535 | 0 | 0.00 |  |
| DQ720544 | 0 | 0.00 |  |
| DQ720552 | 0 | 0.00 |  |
| DQ720562 | 0 | 0.00 |  |
| DQ720605 | 0 | 0.00 |  |
| DQ720611 | 0 | 0.00 |  |
| DQ720628 | 0 | 0.00 |  |
| DQ720635 | 0 | 0.00 |  |
| DQ720673 | 0 | 0.00 |  |
| DQ720689 | 0 | 0.00 |  |
| DQ720696 | 0 | 0.00 |  |
| DQ720699 | 0 | 0.00 |  |
| DQ720715 | 0 | 0.00 |  |
| DQ720744 | 0 | 0.00 |  |
| DQ720745 | 0 | 0.00 |  |
| DQ720750 | 0 | 0.00 |  |
| DQ720754 | 0 | 0.00 |  |
| DQ720759 | 0 | 0.00 |  |
| DQ720772 | 0 | 0.00 |  |
| DQ720778 | 0 | 0.00 |  |
| DQ720805 | 0 | 0.00 |  |
| DQ720829 | 0 | 0.00 |  |
| DQ720870 | 0 | 0.00 |  |
| DQ720875 | 0 | 0.00 |  |
| DQ720901 | 0 | 0.00 |  |
| DQ720906 | 0 | 0.00 |  |
| DQ720927 | 0 | 0.00 |  |
| DQ720952 | 0 | 0.00 |  |
| DQ720968 | 0 | 0.00 |  |
| DQ720972 | 0 | 0.00 |  |
| DQ720997 | 0 | 0.00 |  |
| DQ721008 | 0 | 0.00 |  |
| DQ721012 | 0 | 0.00 |  |
| DQ721024 | 0 | 0.00 |  |
| DQ721038 | 0 | 0.00 |  |
| DQ721063 | 0 | 0.00 |  |

|          |   |      |  |
|----------|---|------|--|
| DQ721065 | 0 | 0.00 |  |
| DQ721078 | 0 | 0.00 |  |
| DQ721090 | 0 | 0.00 |  |
| DQ721116 | 0 | 0.00 |  |
| DQ721120 | 0 | 0.00 |  |
| DQ721121 | 0 | 0.00 |  |
| DQ721203 | 0 | 0.00 |  |
| DQ721216 | 0 | 0.00 |  |
| DQ721222 | 0 | 0.00 |  |
| DQ721229 | 0 | 0.00 |  |
| DQ721239 | 0 | 0.00 |  |
| DQ721308 | 0 | 0.00 |  |
| DQ721311 | 0 | 0.00 |  |
| DQ721319 | 0 | 0.00 |  |
| DQ721325 | 0 | 0.00 |  |
| DQ721327 | 0 | 0.00 |  |
| DQ721346 | 0 | 0.00 |  |
| DQ721347 | 0 | 0.00 |  |
| DQ721352 | 0 | 0.00 |  |
| DQ721373 | 0 | 0.00 |  |
| DQ721377 | 0 | 0.00 |  |
| DQ721385 | 0 | 0.00 |  |
| DQ721394 | 0 | 0.00 |  |
| DQ721397 | 0 | 0.00 |  |
| DQ721405 | 0 | 0.00 |  |
| DQ721411 | 0 | 0.00 |  |
| DQ721446 | 0 | 0.00 |  |
| DQ721504 | 0 | 0.00 |  |
| DQ721562 | 0 | 0.00 |  |
| DQ721581 | 0 | 0.00 |  |
| DQ721601 | 0 | 0.00 |  |
| DQ721604 | 0 | 0.00 |  |
| DQ721631 | 0 | 0.00 |  |
| DQ721672 | 0 | 0.00 |  |
| DQ721680 | 0 | 0.00 |  |
| DQ721685 | 0 | 0.00 |  |
| DQ721726 | 0 | 0.00 |  |
| DQ721765 | 0 | 0.00 |  |
| DQ721786 | 0 | 0.00 |  |
| DQ721815 | 0 | 0.00 |  |
| DQ721839 | 0 | 0.00 |  |
| DQ721858 | 0 | 0.00 |  |
| DQ721911 | 0 | 0.00 |  |
| DQ721917 | 0 | 0.00 |  |
| DQ721924 | 0 | 0.00 |  |
| DQ721944 | 0 | 0.00 |  |
| DQ721958 | 0 | 0.00 |  |

|          |           |      |       |
|----------|-----------|------|-------|
| DQ721963 | 0         | 0.00 |       |
| DQ721965 | 0         | 0.00 |       |
| DQ721971 | 0         | 0.00 |       |
| DQ721975 | 0         | 0.00 |       |
| DQ721976 | 0         | 0.00 |       |
| DQ722071 | 0         | 0.00 |       |
| DQ722090 | 0         | 0.00 |       |
| DQ722103 | 0         | 0.00 |       |
| DQ722152 | 0         | 0.00 |       |
| DQ722155 | 1.0239532 | 0.06 | 6.3%  |
| DQ722161 | 0         | 0.00 |       |
| DQ722162 | 0         | 0.00 |       |
| DQ722174 | 0         | 0.00 |       |
| DQ722182 | 0         | 0.00 |       |
| DQ722193 | 0         | 0.00 |       |
| DQ722203 | 0         | 0.00 |       |
| DQ722227 | 0         | 0.00 |       |
| DQ722278 | 0         | 0.00 |       |
| DQ722287 | 0         | 0.00 |       |
| DQ722332 | 0         | 0.00 |       |
| DQ722338 | 0         | 0.00 |       |
| DQ722351 | 0         | 0.00 |       |
| DQ722357 | 0         | 0.00 |       |
| DQ722402 | 0         | 0.00 |       |
| DQ722415 | 0         | 0.00 |       |
| DQ722435 | 0         | 0.00 |       |
| DQ722438 | 0         | 0.00 |       |
| DQ722444 | 0         | 0.00 |       |
| DQ722445 | 0         | 0.00 |       |
| DQ722446 | 0         | 0.00 |       |
| DQ722450 | 0         | 0.00 |       |
| DQ722464 | 0         | 0.00 |       |
| DQ722489 | 0         | 0.00 |       |
| DQ722532 | 0         | 0.00 |       |
| DQ722594 | 0         | 0.00 |       |
| DQ722649 | 0         | 0.00 |       |
| DQ722660 | 0         | 0.00 |       |
| DQ722682 | 0         | 0.00 |       |
| DQ722700 | 0         | 0.00 |       |
| DQ722747 | 0         | 0.00 |       |
| DQ722800 | 0         | 0.00 |       |
| DQ722824 | 0         | 0.00 |       |
| DQ722831 | 0         | 0.00 |       |
| DQ722851 | 0.798953  | 0.12 | 15.3% |
| DQ722852 | 0         | 0.00 |       |
| DQ722884 | 0         | 0.00 |       |
| DQ722902 | 0         | 0.00 |       |



|          |   |      |  |
|----------|---|------|--|
| DQ722916 | 0 | 0.00 |  |
| DQ722917 | 0 | 0.00 |  |
| DQ722920 | 0 | 0.00 |  |
| DQ723005 | 0 | 0.00 |  |
| DQ723006 | 0 | 0.00 |  |
| DQ723029 | 0 | 0.00 |  |
| DQ723061 | 0 | 0.00 |  |
| DQ723085 | 0 | 0.00 |  |
| DQ723102 | 0 | 0.00 |  |
| DQ723134 | 0 | 0.00 |  |
| DQ723160 | 0 | 0.00 |  |
| DQ723184 | 0 | 0.00 |  |
| DQ723201 | 0 | 0.00 |  |
| DQ723223 | 0 | 0.00 |  |
| DQ723226 | 0 | 0.00 |  |
| DQ723231 | 0 | 0.00 |  |
| DQ723239 | 0 | 0.00 |  |
| DQ723262 | 0 | 0.00 |  |
| DQ723275 | 0 | 0.00 |  |
| DQ723305 | 0 | 0.00 |  |
| DQ723308 | 0 | 0.00 |  |
| DQ723383 | 0 | 0.00 |  |
| DQ723397 | 0 | 0.00 |  |
| DQ723401 | 0 | 0.00 |  |
| DQ723404 | 0 | 0.00 |  |
| DQ723429 | 0 | 0.00 |  |
| DQ723438 | 0 | 0.00 |  |
| DQ723452 | 0 | 0.00 |  |
| DQ723458 | 0 | 0.00 |  |
| DQ723500 | 0 | 0.00 |  |
| DQ723510 | 0 | 0.00 |  |
| DQ723566 | 0 | 0.00 |  |
| DQ723570 | 0 | 0.00 |  |
| DQ723578 | 0 | 0.00 |  |
| DQ723589 | 0 | 0.00 |  |
| DQ723592 | 0 | 0.00 |  |
| DQ723595 | 0 | 0.00 |  |
| DQ723598 | 0 | 0.00 |  |
| DQ723607 | 0 | 0.00 |  |
| DQ723631 | 0 | 0.00 |  |
| DQ723633 | 0 | 0.00 |  |
| DQ723643 | 0 | 0.00 |  |
| DQ723648 | 0 | 0.00 |  |
| DQ723665 | 0 | 0.00 |  |
| DQ723677 | 0 | 0.00 |  |
| DQ723704 | 0 | 0.00 |  |
| DQ723763 | 0 | 0.00 |  |

|          |   |      |  |
|----------|---|------|--|
| DQ723771 | 0 | 0.00 |  |
| DQ723777 | 0 | 0.00 |  |
| DQ723845 | 0 | 0.00 |  |
| DQ723850 | 0 | 0.00 |  |
| DQ723871 | 0 | 0.00 |  |
| DQ723876 | 0 | 0.00 |  |
| DQ723890 | 0 | 0.00 |  |
| DQ723909 | 0 | 0.00 |  |
| DQ723948 | 0 | 0.00 |  |
| DQ723949 | 0 | 0.00 |  |
| DQ723956 | 0 | 0.00 |  |
| DQ723978 | 0 | 0.00 |  |
| DQ723991 | 0 | 0.00 |  |
| DQ723996 | 0 | 0.00 |  |
| DQ724019 | 0 | 0.00 |  |
| DQ724027 | 0 | 0.00 |  |
| DQ724032 | 0 | 0.00 |  |
| DQ724092 | 0 | 0.00 |  |
| DQ724107 | 0 | 0.00 |  |
| DQ724109 | 0 | 0.00 |  |
| DQ724143 | 0 | 0.00 |  |
| DQ724198 | 0 | 0.00 |  |
| DQ724203 | 0 | 0.00 |  |
| DQ724237 | 0 | 0.00 |  |
| DQ724247 | 0 | 0.00 |  |
| DQ724252 | 0 | 0.00 |  |
| DQ724256 | 0 | 0.00 |  |
| DQ724299 | 0 | 0.00 |  |
| DQ724322 | 0 | 0.00 |  |
| DQ724356 | 0 | 0.00 |  |
| DQ724363 | 0 | 0.00 |  |
| DQ724380 | 0 | 0.00 |  |
| DQ724387 | 0 | 0.00 |  |
| DQ724475 | 0 | 0.00 |  |
| DQ724494 | 0 | 0.00 |  |
| DQ724508 | 0 | 0.00 |  |
| DQ724511 | 0 | 0.00 |  |
| DQ724512 | 0 | 0.00 |  |
| DQ724516 | 0 | 0.00 |  |
| DQ724531 | 0 | 0.00 |  |
| DQ724532 | 0 | 0.00 |  |
| DQ724541 | 0 | 0.00 |  |
| DQ724542 | 0 | 0.00 |  |
| DQ724543 | 0 | 0.00 |  |
| DQ724562 | 0 | 0.00 |  |
| DQ724574 | 0 | 0.00 |  |
| DQ724579 | 0 | 0.00 |  |

|          |   |      |  |
|----------|---|------|--|
| DQ724588 | 0 | 0.00 |  |
| DQ724590 | 0 | 0.00 |  |
| DQ724625 | 0 | 0.00 |  |
| DQ724629 | 0 | 0.00 |  |
| DQ724646 | 0 | 0.00 |  |
| DQ724649 | 0 | 0.00 |  |
| DQ724664 | 0 | 0.00 |  |
| DQ724678 | 0 | 0.00 |  |
| DQ724684 | 0 | 0.00 |  |
| DQ724707 | 0 | 0.00 |  |
| DQ724729 | 0 | 0.00 |  |
| DQ724813 | 0 | 0.00 |  |
| DQ724814 | 0 | 0.00 |  |
| DQ724863 | 0 | 0.00 |  |
| DQ724865 | 0 | 0.00 |  |
| DQ724884 | 0 | 0.00 |  |
| DQ724896 | 0 | 0.00 |  |
| DQ724898 | 0 | 0.00 |  |
| DQ724952 | 0 | 0.00 |  |
| DQ725003 | 0 | 0.00 |  |
| DQ725027 | 0 | 0.00 |  |
| DQ725048 | 0 | 0.00 |  |
| DQ725059 | 0 | 0.00 |  |
| DQ725072 | 0 | 0.00 |  |
| DQ725081 | 0 | 0.00 |  |
| DQ725097 | 0 | 0.00 |  |
| DQ725111 | 0 | 0.00 |  |
| DQ725126 | 0 | 0.00 |  |
| DQ725128 | 0 | 0.00 |  |
| DQ725163 | 0 | 0.00 |  |
| DQ725177 | 0 | 0.00 |  |
| DQ725182 | 0 | 0.00 |  |
| DQ725209 | 0 | 0.00 |  |
| DQ725213 | 0 | 0.00 |  |
| DQ725256 | 0 | 0.00 |  |
| DQ725291 | 0 | 0.00 |  |
| DQ725296 | 0 | 0.00 |  |
| DQ725319 | 0 | 0.00 |  |
| DQ725325 | 0 | 0.00 |  |
| DQ725337 | 0 | 0.00 |  |
| DQ725339 | 0 | 0.00 |  |
| DQ725355 | 0 | 0.00 |  |
| DQ725364 | 0 | 0.00 |  |
| DQ725413 | 0 | 0.00 |  |
| DQ725435 | 0 | 0.00 |  |
| DQ725449 | 0 | 0.00 |  |
| DQ725458 | 0 | 0.00 |  |

|          |   |      |  |
|----------|---|------|--|
| DQ725525 | 0 | 0.00 |  |
| DQ725560 | 0 | 0.00 |  |
| DQ725586 | 0 | 0.00 |  |
| DQ725616 | 0 | 0.00 |  |
| DQ725630 | 0 | 0.00 |  |
| DQ725656 | 0 | 0.00 |  |
| DQ725679 | 0 | 0.00 |  |
| DQ725680 | 0 | 0.00 |  |
| DQ725681 | 0 | 0.00 |  |
| DQ725733 | 0 | 0.00 |  |
| DQ725761 | 0 | 0.00 |  |
| DQ725778 | 0 | 0.00 |  |
| DQ725779 | 0 | 0.00 |  |
| DQ725784 | 0 | 0.00 |  |
| DQ725791 | 0 | 0.00 |  |
| DQ725848 | 0 | 0.00 |  |
| DQ725849 | 0 | 0.00 |  |
| DQ725860 | 0 | 0.00 |  |
| DQ725871 | 0 | 0.00 |  |
| DQ725875 | 0 | 0.00 |  |
| DQ725877 | 0 | 0.00 |  |
| DQ725898 | 0 | 0.00 |  |
| DQ725943 | 0 | 0.00 |  |
| DQ725962 | 0 | 0.00 |  |
| DQ726010 | 0 | 0.00 |  |
| DQ726025 | 0 | 0.00 |  |
| DQ726035 | 0 | 0.00 |  |
| DQ726065 | 0 | 0.00 |  |
| DQ726078 | 0 | 0.00 |  |
| DQ726121 | 0 | 0.00 |  |
| DQ726127 | 0 | 0.00 |  |
| DQ726146 | 0 | 0.00 |  |
| DQ726151 | 0 | 0.00 |  |
| DQ726154 | 0 | 0.00 |  |
| DQ726158 | 0 | 0.00 |  |
| DQ726174 | 0 | 0.00 |  |
| DQ726177 | 0 | 0.00 |  |
| DQ726245 | 0 | 0.00 |  |
| DQ726247 | 0 | 0.00 |  |
| DQ726248 | 0 | 0.00 |  |
| DQ726275 | 0 | 0.00 |  |
| DQ726285 | 0 | 0.00 |  |
| DQ726341 | 0 | 0.00 |  |
| DQ726346 | 0 | 0.00 |  |
| DQ726353 | 0 | 0.00 |  |
| DQ726379 | 0 | 0.00 |  |
| DQ726408 | 0 | 0.00 |  |

|          |   |      |  |
|----------|---|------|--|
| DQ726412 | 0 | 0.00 |  |
| DQ726464 | 0 | 0.00 |  |
| DQ726470 | 0 | 0.00 |  |
| DQ726480 | 0 | 0.00 |  |
| DQ726481 | 0 | 0.00 |  |
| DQ726489 | 0 | 0.00 |  |
| DQ726495 | 0 | 0.00 |  |
| DQ726545 | 0 | 0.00 |  |
| DQ726565 | 0 | 0.00 |  |
| DQ726586 | 0 | 0.00 |  |
| DQ726589 | 0 | 0.00 |  |
| DQ726604 | 0 | 0.00 |  |
| DQ726614 | 0 | 0.00 |  |
| DQ726630 | 0 | 0.00 |  |
| DQ726631 | 0 | 0.00 |  |
| DQ726638 | 0 | 0.00 |  |
| DQ726650 | 0 | 0.00 |  |
| DQ726662 | 0 | 0.00 |  |
| DQ726766 | 0 | 0.00 |  |
| DQ726768 | 0 | 0.00 |  |
| DQ726785 | 0 | 0.00 |  |
| DQ726829 | 0 | 0.00 |  |
| DQ726843 | 0 | 0.00 |  |
| DQ726846 | 0 | 0.00 |  |
| DQ726861 | 0 | 0.00 |  |
| DQ726874 | 0 | 0.00 |  |
| DQ726875 | 0 | 0.00 |  |
| DQ726893 | 0 | 0.00 |  |
| DQ726911 | 0 | 0.00 |  |
| DQ726916 | 0 | 0.00 |  |
| DQ726954 | 0 | 0.00 |  |
| DQ727011 | 0 | 0.00 |  |
| DQ727024 | 0 | 0.00 |  |
| DQ727054 | 0 | 0.00 |  |
| DQ727056 | 0 | 0.00 |  |
| DQ727057 | 0 | 0.00 |  |
| DQ727065 | 0 | 0.00 |  |
| DQ727080 | 0 | 0.00 |  |
| DQ727096 | 0 | 0.00 |  |
| DQ727109 | 0 | 0.00 |  |
| DQ727184 | 0 | 0.00 |  |
| DQ727197 | 0 | 0.00 |  |
| DQ727213 | 0 | 0.00 |  |
| DQ727224 | 0 | 0.00 |  |
| DQ727227 | 0 | 0.00 |  |
| DQ727241 | 0 | 0.00 |  |
| DQ727320 | 0 | 0.00 |  |

|                         |             |      |        |
|-------------------------|-------------|------|--------|
| DQ727336                | 0           | 0.00 |        |
| DQ727343                | 0           | 0.00 |        |
| DQ727348                | 0           | 0.00 |        |
| DQ727384                | 0           | 0.00 |        |
| DQ727392                | 0           | 0.00 |        |
| DQ851563                | 0           | 0.00 |        |
| DQ874391                | 0           | 0.00 |        |
| Dqx1                    | 0.169232    | 0.04 | 20.8%  |
| Dr1                     | 18.36384    | 1.07 | 5.8%   |
| Dra                     | 0           | 0.00 |        |
| Drap1                   | 65.2014     | 4.33 | 6.6%   |
| Drctnnb1a               | 4.30481     | 0.64 | 14.9%  |
| Drd1a                   | 0.07373384  | 0.02 | 33.6%  |
| Drd1ip                  | 88.08132    | 3.85 | 4.4%   |
| Drd2                    | 7.23483     | 0.30 | 4.2%   |
| Drd3                    | 0.00864052  | 0.01 | 140.8% |
| Drd4                    | 0.07192894  | 0.01 | 18.4%  |
| Drd5                    | 0.496315    | 0.14 | 27.5%  |
| DREAM/calsenilin/KChIP3 | 0.2234282   | 0.07 | 32.3%  |
| Drg1                    | 38.85294    | 1.78 | 4.6%   |
| Drg2                    | 15.74706    | 0.92 | 5.8%   |
| DRIM                    | 2.585688    | 0.14 | 5.6%   |
| Drp1                    | 5.13001     | 0.67 | 13.0%  |
| Drp2                    | 4.288802    | 0.67 | 15.6%  |
| Dsc1                    | 0.0286306   | 0.02 | 65.1%  |
| Dsc2                    | 0.6297574   | 0.09 | 14.2%  |
| Dsc3                    | 0.001429774 | 0.00 | 223.6% |
| DSC3                    | 0           | 0.00 |        |
| Dscam                   | 17.5214     | 0.71 | 4.0%   |
| Dscam1                  | 3.223164    | 0.13 | 3.9%   |
| Dscr2                   | 8.901934    | 0.92 | 10.4%  |
| Dscr3                   | 20.93748    | 0.82 | 3.9%   |
| Dse                     | 1.895424    | 0.15 | 8.0%   |
| Dsel                    | 3.554972    | 0.12 | 3.4%   |
| Dsg1b                   | 0.004056206 | 0.01 | 140.5% |
| Dsg1c                   | 0           | 0.00 |        |
| Dsg2                    | 0.2119194   | 0.07 | 32.5%  |
| Dsg3                    | 0.011437932 | 0.01 | 72.5%  |
| Dsg4                    | 0           | 0.00 |        |
| Dsn1                    | 2.414792    | 0.12 | 4.8%   |
| Dsp                     | 0.05308878  | 0.02 | 44.1%  |
| Dspp                    | 0.001330124 | 0.00 | 223.6% |
| Dst                     | 12.23692    | 1.26 | 10.3%  |
| Dstn                    | 72.96252    | 5.91 | 8.1%   |
| Dtd1                    | 30.10212    | 0.77 | 2.6%   |
| Dtl                     | 0.595982    | 0.05 | 8.0%   |
| Dtna                    | 26.04974    | 2.00 | 7.7%   |

|         |             |      |        |
|---------|-------------|------|--------|
| dtna    | 0.9046962   | 0.70 | 77.1%  |
| Dtnb    | 10.09393    | 1.03 | 10.2%  |
| dtb-b   | 0.2126198   | 0.07 | 33.8%  |
| Dtnbp1  | 17.01814    | 1.65 | 9.7%   |
| Dtwd1   | 2.331336    | 0.23 | 9.7%   |
| Dtwd2   | 1.434618    | 0.11 | 7.7%   |
| Dtx1    | 21.13314    | 0.52 | 2.4%   |
| Dtx2    | 2.52505     | 0.25 | 9.9%   |
| Dtx3    | 63.5939     | 2.30 | 3.6%   |
| Dtx3l   | 0.3323706   | 0.05 | 14.7%  |
| Dtx4    | 15.66276    | 1.57 | 10.1%  |
| Dtymk   | 20.48522    | 1.38 | 6.7%   |
| Dub1    | 0           | 0.00 |        |
| Dub1a   | 0           | 0.00 |        |
| Dub2    | 0           | 0.00 |        |
| Dub2a   | 0           | 0.00 |        |
| Dullard | 14.83046    | 1.05 | 7.1%   |
| Duox1   | 0.009363498 | 0.01 | 83.6%  |
| Duox2   | 0.2009128   | 0.06 | 28.2%  |
| Duoxa1  | 0.01679148  | 0.02 | 118.4% |
| Duoxa2  | 0.1144319   | 0.02 | 20.0%  |
| Dupd1   | 0           | 0.00 |        |
| Dus1l   | 7.39689     | 0.38 | 5.1%   |
| Dus2l   | 5.887908    | 0.55 | 9.3%   |
| Dus3l   | 32.06912    | 2.14 | 6.7%   |
| Dus4l   | 1.373646    | 0.03 | 2.3%   |
| Dusp1   | 2.64007     | 0.41 | 15.4%  |
| Dusp10  | 2.497346    | 0.20 | 8.1%   |
| Dusp11  | 10.2655     | 0.17 | 1.7%   |
| Dusp12  | 9.324302    | 0.90 | 9.7%   |
| Dusp13  | 0.0328058   | 0.03 | 84.4%  |
| Dusp14  | 0.6371192   | 0.12 | 18.6%  |
| Dusp15  | 5.30398     | 0.46 | 8.7%   |
| Dusp16  | 1.41109     | 0.33 | 23.5%  |
| Dusp18  | 0.7779302   | 0.11 | 14.2%  |
| Dusp19  | 3.342126    | 0.49 | 14.5%  |
| Dusp2   | 0.9299394   | 0.13 | 13.5%  |
| Dusp21  | 0           | 0.00 |        |
| Dusp22  | 15.50908    | 1.01 | 6.5%   |
| Dusp23  | 1.526406    | 0.11 | 7.5%   |
| Dusp26  | 23.17332    | 1.22 | 5.3%   |
| Dusp27  | 0.013862388 | 0.01 | 47.0%  |
| Dusp28  | 6.329628    | 0.24 | 3.8%   |
| Dusp3   | 12.54342    | 0.68 | 5.4%   |
| Dusp4   | 5.263074    | 1.48 | 28.2%  |
| Dusp5   | 1.646166    | 0.34 | 20.4%  |
| Dusp6   | 7.120518    | 0.72 | 10.1%  |

|               |            |      |        |
|---------------|------------|------|--------|
| Dusp7         | 6.280318   | 0.29 | 4.7%   |
| Dusp8         | 25.01758   | 1.19 | 4.8%   |
| Dusp9         | 0.8623464  | 0.25 | 29.2%  |
| Dut           | 8.412336   | 0.24 | 2.8%   |
| Dutp          | 0.05895942 | 0.01 | 19.4%  |
| Dux           | 0          | 0.00 |        |
| Dvl1          | 16.44918   | 1.16 | 7.0%   |
| Dvl2          | 5.387514   | 0.59 | 10.9%  |
| Dvl3          | 20.05948   | 0.37 | 1.8%   |
| DXBay18       | 0.00339938 | 0.01 | 223.6% |
| Dxml1         | 0.12834022 | 0.05 | 37.5%  |
| Dydc1         | 0.00510628 | 0.01 | 223.6% |
| Dydc2         | 0.08181352 | 0.06 | 74.8%  |
| Dym           | 18.51862   | 0.39 | 2.1%   |
| Dync1h1       | 45.29256   | 2.54 | 5.6%   |
| Dync1i1       | 38.33088   | 1.09 | 2.8%   |
| Dync1i2       | 48.74378   | 1.42 | 2.9%   |
| Dync1li1      | 46.08504   | 1.74 | 3.8%   |
| Dync1li2      | 49.49486   | 1.52 | 3.1%   |
| Dync2h1       | 3.540218   | 0.32 | 9.1%   |
| Dync2li1      | 7.169532   | 0.44 | 6.2%   |
| Dynll1        | 63.09012   | 7.98 | 12.6%  |
| Dynll2        | 281.1604   | 1.00 | 0.4%   |
| Dynlrb1       | 133.3422   | 9.82 | 7.4%   |
| Dynlrb2       | 0.11839048 | 0.03 | 22.5%  |
| Dynlt1        | 0.17048316 | 0.08 | 45.1%  |
| Dynlt3        | 78.21034   | 2.62 | 3.4%   |
| Dyrk1a        | 19.94652   | 0.54 | 2.7%   |
| Dyrk1b        | 4.919758   | 0.42 | 8.5%   |
| Dyrk2         | 5.599786   | 0.29 | 5.2%   |
| Dyrk3         | 1.281096   | 0.20 | 16.0%  |
| Dyrk4         | 0          | 0.00 |        |
| Dysf          | 0.6614744  | 0.12 | 18.7%  |
| Dysfip1       | 0.0067778  | 0.02 | 223.6% |
| dystrophin    | 3.600476   | 0.59 | 16.5%  |
| Dytn          | 0.00456998 | 0.01 | 137.0% |
| Dyx1c1        | 0.4638118  | 0.12 | 26.2%  |
| Dzip1         | 56.99888   | 1.41 | 2.5%   |
| Dzip1l        | 2.6997     | 0.31 | 11.4%  |
| Dzip3         | 38.17534   | 1.25 | 3.3%   |
| E030002O03Rik | 0          | 0.00 |        |
| E030010A14Rik | 0.14364124 | 0.07 | 46.8%  |
| E030011K20Rik | 0          | 0.00 |        |
| E030018N11Rik | 0.9569266  | 0.14 | 14.4%  |
| E030019B06Rik | 0.451994   | 0.14 | 30.6%  |
| E030025P04Rik | 0          | 0.00 |        |
| E030041M21Rik | 14.77254   | 0.68 | 4.6%   |



|               |            |      |        |
|---------------|------------|------|--------|
| E030049G20Rik | 0.8689212  | 0.08 | 9.4%   |
| E130009J12Rik | 0.05172354 | 0.04 | 82.8%  |
| E130012A19Rik | 6.061358   | 0.52 | 8.6%   |
| E130014J05Rik | 3.447296   | 0.12 | 3.5%   |
| E130016E03Rik | 0.2380864  | 0.02 | 6.9%   |
| E130018O15Rik | 0          | 0.00 |        |
| E130112L23Rik | 5.68271    | 0.54 | 9.5%   |
| E130114P18Rik | 0.5042472  | 0.34 | 68.0%  |
| E130120F12Rik | 0.1732106  | 0.07 | 38.7%  |
| E130203B14Rik | 2.074786   | 0.31 | 15.2%  |
| E130303B06Rik | 2.60217    | 0.15 | 5.9%   |
| E130304F04Rik | 0          | 0.00 |        |
| E130306D19Rik | 0.1683758  | 0.02 | 10.3%  |
| E130308A19Rik | 2.727224   | 0.43 | 15.7%  |
| E130309D02Rik | 5.701948   | 0.35 | 6.2%   |
| E130309D14Rik | 6.65998    | 0.46 | 6.8%   |
| E130309F12Rik | 7.181926   | 1.51 | 21.0%  |
| E130310K16Rik | 1.4292326  | 0.30 | 20.8%  |
| E130311K13Rik | 2.709614   | 0.21 | 7.8%   |
| E130319B15Rik | 1.84661    | 0.16 | 8.7%   |
| E230008N13Rik | 0          | 0.00 |        |
| E230019M04Rik | 0          | 0.00 |        |
| E230022H04Rik | 4.215268   | 0.61 | 14.4%  |
| E230025N22Rik | 0.0146779  | 0.02 | 136.8% |
| E2f1          | 3.723008   | 0.36 | 9.6%   |
| E2f2          | 0.5900158  | 0.12 | 20.8%  |
| E2f3          | 2.469958   | 0.31 | 12.6%  |
| E2F3          | 0.5941856  | 0.40 | 67.0%  |
| E2f4          | 7.292492   | 0.53 | 7.3%   |
| E2f5          | 2.11122    | 0.22 | 10.5%  |
| E2f6          | 9.591628   | 0.88 | 9.1%   |
| E2f7          | 0.217937   | 0.02 | 10.7%  |
| E2f8          | 0.2565778  | 0.06 | 24.0%  |
| E330009J07Rik | 5.152156   | 0.32 | 6.3%   |
| E330009P21Rik | 0          | 0.00 |        |
| E330016A19Rik | 0.2696046  | 0.06 | 23.1%  |
| E330017A01Rik | 0          | 0.00 |        |
| E330018D03Rik | 2.69384    | 0.30 | 11.1%  |
| E330021D16Rik | 0          | 0.00 |        |
| E330026B02Rik | 0.1256976  | 0.05 | 42.4%  |
| E330034G19Rik | 0          | 0.00 |        |
| E430002G05Rik | 0.49022    | 0.13 | 26.5%  |
| E430004N04Rik | 0.01216404 | 0.01 | 106.6% |
| E430018J23Rik | 1.234588   | 0.12 | 9.9%   |
| E430025E21Rik | 13.42574   | 0.20 | 1.5%   |
| E430028B21Rik | 5.774602   | 0.37 | 6.4%   |
| E430029J22Rik | 0          | 0.00 |        |

|               |             |      |        |
|---------------|-------------|------|--------|
| E4f1          | 5.852106    | 0.15 | 2.5%   |
| E530011F12Rik | 0           | 0.00 |        |
| Eaf1          | 4.68017     | 0.24 | 5.1%   |
| Eaf2          | 0.12628584  | 0.06 | 45.5%  |
| Ean57         | 0.005050418 | 0.01 | 163.8% |
| Eapa2         | 0.012412314 | 0.00 | 16.8%  |
| Eapp          | 13.6502     | 0.73 | 5.3%   |
| Ear1          | 0           | 0.00 |        |
| Ear10         | 0           | 0.00 |        |
| Ear11         | 0           | 0.00 |        |
| Ear14         | 0           | 0.00 |        |
| Ear2          | 0           | 0.00 |        |
| Ear5          | 0           | 0.00 |        |
| Ear6          | 0           | 0.00 |        |
| Ears2         | 2.595826    | 0.22 | 8.4%   |
| Ebag9         | 14.3889     | 0.55 | 3.8%   |
| EBF           | 0.31280168  | 0.17 | 54.2%  |
| Ebf1          | 5.8734      | 0.23 | 3.9%   |
| Ebf2          | 0.8120416   | 0.25 | 30.8%  |
| Ebf3          | 16.72286    | 1.09 | 6.5%   |
| Ebf4          | 7.999898    | 0.35 | 4.4%   |
| Ebi2          | 0           | 0.00 |        |
| Ebi3          | 0.7793602   | 0.16 | 19.9%  |
| Ebna1bp2      | 14.45232    | 0.52 | 3.6%   |
| Ebp           | 11.79472    | 1.77 | 15.0%  |
| Ebpl          | 5.641228    | 0.41 | 7.3%   |
| Ecd           | 11.1824     | 0.45 | 4.1%   |
| Ece1          | 5.714858    | 0.41 | 7.2%   |
| Ece2          | 11.55218    | 0.68 | 5.9%   |
| Ecel1         | 12.89108    | 0.44 | 3.4%   |
| Ecgf1         | 6.436416    | 0.26 | 4.0%   |
| Ech1          | 8.564708    | 0.42 | 4.9%   |
| Echdc1        | 10.64028    | 0.53 | 4.9%   |
| Echdc2        | 1.30642     | 0.17 | 13.4%  |
| Echdc3        | 0.01636708  | 0.02 | 114.0% |
| Echs1         | 23.43838    | 1.62 | 6.9%   |
| Ecm1          | 0.6432206   | 0.11 | 17.1%  |
| Ecm2          | 0.7426428   | 0.13 | 17.0%  |
| Ecsit         | 12.8298     | 0.52 | 4.1%   |
| Ect2          | 0.765642    | 0.12 | 15.6%  |
| Ed2           | 4.414862    | 0.77 | 17.4%  |
| Eda           | 2.02142     | 0.17 | 8.4%   |
| Eda2r         | 2.532186    | 0.47 | 18.5%  |
| Edar          | 0.00556492  | 0.01 | 143.4% |
| Edaradd       | 0.03597796  | 0.02 | 56.0%  |
| Edc3          | 9.159068    | 0.61 | 6.7%   |
| Edc4          | 13.92936    | 0.30 | 2.2%   |

|          |             |       |        |
|----------|-------------|-------|--------|
| Edem1    | 3.805622    | 0.20  | 5.2%   |
| Edem2    | 7.305468    | 0.58  | 7.9%   |
| Edem3    | 11.1369     | 0.57  | 5.1%   |
| EDEM3    | 0.1092063   | 0.02  | 21.5%  |
| Edf1     | 26.62948    | 2.62  | 9.9%   |
| Edg1     | 2.906154    | 0.27  | 9.2%   |
| Edg2     | 3.50284     | 0.38  | 10.7%  |
| Edg3     | 4.192166    | 0.44  | 10.4%  |
| Edg4     | 0.6914902   | 0.08  | 11.0%  |
| Edg5     | 1.288712    | 0.12  | 9.3%   |
| Edg6     | 0.00818396  | 0.01  | 139.0% |
| Edg7     | 0.1159384   | 0.05  | 45.9%  |
| Edg8     | 0.4793524   | 0.11  | 22.3%  |
| Edil3    | 88.36518    | 2.87  | 3.3%   |
| Edn1     | 0.0834448   | 0.03  | 31.2%  |
| Edn2     | 0.00410738  | 0.01  | 223.6% |
| Edn3     | 0.12690836  | 0.04  | 28.4%  |
| Ednra    | 2.4759492   | 1.22  | 49.4%  |
| Ednrb    | 21.13548    | 2.13  | 10.1%  |
| edpk     | 0.635912    | 0.16  | 24.5%  |
| Edr2_p36 | 0.989169    | 0.29  | 29.3%  |
| Eea1     | 9.134066    | 0.43  | 4.7%   |
| Eed      | 3.262554    | 0.30  | 9.3%   |
| Eef1a1   | 368.7156    | 29.98 | 8.1%   |
| Eef1a2   | 184.9072    | 9.39  | 5.1%   |
| Eef1b2   | 115.3708    | 7.56  | 6.6%   |
| Eef1d    | 22.0865     | 2.40  | 10.9%  |
| Eef1e1   | 26.8425     | 3.94  | 14.7%  |
| Eef1g    | 35.5068     | 3.03  | 8.5%   |
| Eef2     | 354.381     | 21.81 | 6.2%   |
| Eef2k    | 7.090918    | 0.55  | 7.7%   |
| Eefsec   | 4.458374    | 0.54  | 12.2%  |
| EF651840 | 0           | 0.00  |        |
| EF660528 | 0.0506185   | 0.05  | 104.7% |
| Efcab1   | 0.9324294   | 0.14  | 15.1%  |
| Efcab2   | 7.33601     | 0.34  | 4.7%   |
| Efcab3   | 0.08195502  | 0.03  | 41.8%  |
| Efcab4a  | 0.632037    | 0.13  | 20.5%  |
| Efcab4b  | 0.13177612  | 0.08  | 64.2%  |
| Efcab5   | 0.4488044   | 0.11  | 23.4%  |
| Efcbp1   | 7.695632    | 0.34  | 4.4%   |
| Efcbp2   | 13.50422    | 1.24  | 9.2%   |
| Efemp1   | 0.3829264   | 0.16  | 43.0%  |
| Efemp2   | 10.180976   | 0.99  | 9.7%   |
| Efha1    | 12.9694     | 0.99  | 7.6%   |
| Efhb     | 0.018857022 | 0.02  | 80.0%  |
| Efhc1    | 0.3288622   | 0.10  | 31.6%  |

|          |             |      |        |
|----------|-------------|------|--------|
| Efhc2    | 0.11467738  | 0.04 | 36.7%  |
| Efhd1    | 1.0330324   | 0.14 | 13.3%  |
| Efhd2    | 17.29152    | 1.68 | 9.7%   |
| Efna1    | 0.1801144   | 0.06 | 33.6%  |
| Efna2    | 2.583892    | 0.48 | 18.7%  |
| Efna3    | 23.33204    | 1.79 | 7.7%   |
| Efna4    | 0.5291508   | 0.10 | 18.8%  |
| Efna5    | 12.35022    | 0.50 | 4.1%   |
| Efnb1    | 2.828482    | 0.33 | 11.8%  |
| Efnb2    | 8.713572    | 0.62 | 7.1%   |
| Efnb3    | 11.099472   | 1.85 | 16.7%  |
| Efs      | 1.826344    | 0.34 | 18.4%  |
| Eftud1   | 3.234458    | 0.13 | 4.0%   |
| Eftud2   | 14.54384    | 0.26 | 1.8%   |
| EG114600 | 0           | 0.00 |        |
| EG13909  | 0           | 0.00 |        |
| EG194588 | 0           | 0.00 |        |
| EG208426 | 0.919522    | 0.13 | 13.7%  |
| EG209380 | 0           | 0.00 |        |
| EG209786 | 0.00976018  | 0.02 | 223.6% |
| EG210155 | 0           | 0.00 |        |
| EG210583 | 0.10999266  | 0.01 | 13.6%  |
| EG210853 | 0.7206362   | 0.15 | 20.7%  |
| EG210876 | 0.01023886  | 0.01 | 140.3% |
| EG211223 | 0           | 0.00 |        |
| EG212225 | 0.001911792 | 0.00 | 223.6% |
| EG214321 | 0.06066608  | 0.03 | 51.3%  |
| EG214403 | 0.00946708  | 0.01 | 92.4%  |
| EG215472 | 0           | 0.00 |        |
| EG215714 | 0.2078672   | 0.07 | 35.2%  |
| EG218444 | 0           | 0.00 |        |
| EG224552 | 0.00339436  | 0.01 | 223.6% |
| EG224572 | 0           | 0.00 |        |
| EG224576 | 0           | 0.00 |        |
| EG224582 | 0           | 0.00 |        |
| EG224916 | 0           | 0.00 |        |
| EG225594 | 0.01551608  | 0.01 | 66.3%  |
| EG229571 | 0.00319422  | 0.01 | 223.6% |
| EG229862 | 0           | 0.00 |        |
| EG231591 | 0           | 0.00 |        |
| EG232358 | 0           | 0.00 |        |
| EG232599 | 0.10992612  | 0.03 | 29.8%  |
| EG232801 | 0           | 0.00 |        |
| EG233164 | 0.00386048  | 0.01 | 223.6% |
| EG235327 | 0.00405834  | 0.01 | 223.6% |
| EG236749 | 0.12935826  | 0.03 | 20.7%  |
| EG237300 | 0.00577936  | 0.01 | 143.7% |

|          |             |      |        |
|----------|-------------|------|--------|
| EG238829 | 0.00756282  | 0.02 | 223.6% |
| EG240055 | 0.4840454   | 0.09 | 19.6%  |
| EG240327 | 0.01051434  | 0.01 | 92.9%  |
| EG240549 | 0.14263808  | 0.07 | 45.6%  |
| EG241041 | 0.0129428   | 0.02 | 138.8% |
| EG243628 | 0           | 0.00 |        |
| EG244595 | 0.00389368  | 0.01 | 223.6% |
| EG245263 | 0.0052681   | 0.01 | 137.3% |
| EG245297 | 5.643488    | 0.49 | 8.7%   |
| EG245376 | 0.01992996  | 0.03 | 164.7% |
| EG245405 | 5.561228    | 1.12 | 20.1%  |
| EG266459 | 0.0105954   | 0.01 | 137.4% |
| EG269902 | 0.11589406  | 0.01 | 12.2%  |
| EG278087 | 0           | 0.00 |        |
| EG317677 | 0.21198292  | 0.09 | 40.9%  |
| EG328231 | 0.00645018  | 0.01 | 223.6% |
| EG328264 | 0.01306416  | 0.01 | 99.8%  |
| EG328354 | 0.00504602  | 0.01 | 223.6% |
| EG328479 | 0.147476    | 0.02 | 16.6%  |
| EG328644 | 13.05414    | 1.46 | 11.2%  |
| EG328839 | 0.00359006  | 0.01 | 223.6% |
| EG329070 | 6.11546     | 0.85 | 13.9%  |
| EG329541 | 0.03165082  | 0.02 | 69.6%  |
| EG329763 | 0.00650856  | 0.01 | 223.6% |
| EG330157 | 0.00245644  | 0.01 | 223.6% |
| EG330305 | 0           | 0.00 |        |
| EG330496 | 0           | 0.00 |        |
| EG330503 | 6.321352    | 0.25 | 4.0%   |
| EG330513 | 0.001812506 | 0.00 | 223.6% |
| EG330602 | 0.01651566  | 0.02 | 147.8% |
| EG331392 | 5.705788    | 0.56 | 9.9%   |
| EG331493 | 0           | 0.00 |        |
| EG331529 | 0           | 0.00 |        |
| EG333452 | 0           | 0.00 |        |
| EG333669 | 0           | 0.00 |        |
| EG368203 | 0.15495484  | 0.12 | 76.3%  |
| EG380907 | 0           | 0.00 |        |
| EG381438 | 12.75992    | 1.28 | 10.1%  |
| EG381483 | 0           | 0.00 |        |
| EG381818 | 0           | 0.00 |        |
| EG381852 | 0           | 0.00 |        |
| EG381936 | 0           | 0.00 |        |
| EG382106 | 0.00988234  | 0.01 | 140.5% |
| EG382109 | 0.00776438  | 0.02 | 223.6% |
| EG382156 | 0           | 0.00 |        |
| EG382275 | 0           | 0.00 |        |
| EG382639 | 0.15763868  | 0.05 | 32.1%  |

|          |             |      |        |
|----------|-------------|------|--------|
| EG384219 | 0           | 0.00 |        |
| EG384220 | 0.00330688  | 0.01 | 223.6% |
| EG384221 | 0           | 0.00 |        |
| EG384813 | 0           | 0.00 |        |
| EG384814 | 0           | 0.00 |        |
| EG385328 | 0           | 0.00 |        |
| EG386551 | 0           | 0.00 |        |
| EG406223 | 0           | 0.00 |        |
| EG408196 | 0           | 0.00 |        |
| EG432436 | 0           | 0.00 |        |
| EG432555 | 0.00225728  | 0.01 | 223.6% |
| EG432637 | 0.05210938  | 0.02 | 43.2%  |
| EG432723 | 0           | 0.00 |        |
| EG432743 | 0.01087374  | 0.02 | 147.6% |
| EG432825 | 0           | 0.00 |        |
| EG432838 | 0           | 0.00 |        |
| EG432867 | 0           | 0.00 |        |
| EG432870 | 0.05843316  | 0.03 | 45.8%  |
| EG432879 | 0.2854338   | 0.07 | 25.0%  |
| EG432939 | 0.6084276   | 0.14 | 23.5%  |
| EG432982 | 0.04699338  | 0.02 | 46.8%  |
| EG432987 | 0           | 0.00 |        |
| EG433016 | 0           | 0.00 |        |
| EG433070 | 0           | 0.00 |        |
| EG433178 | 0           | 0.00 |        |
| EG433180 | 0           | 0.00 |        |
| EG433182 | 15.1289     | 1.58 | 10.5%  |
| EG433365 | 0.0068599   | 0.01 | 140.4% |
| EG433632 | 0.0916299   | 0.04 | 44.4%  |
| EG433634 | 0           | 0.00 |        |
| EG433923 | 19.73678    | 1.57 | 8.0%   |
| EG434008 | 23.16506    | 2.62 | 11.3%  |
| EG434128 | 61.46932    | 3.50 | 5.7%   |
| EG434171 | 0.001669114 | 0.00 | 223.6% |
| EG434172 | 0           | 0.00 |        |
| EG434179 | 1.0248306   | 0.12 | 12.2%  |
| EG434197 | 0.006571692 | 0.01 | 91.8%  |
| EG434280 | 0.2221172   | 0.05 | 20.5%  |
| EG434396 | 0           | 0.00 |        |
| EG434402 | 3.162982    | 0.49 | 15.6%  |
| EG434459 | 0.0240297   | 0.02 | 77.6%  |
| EG434510 | 0           | 0.00 |        |
| EG434674 | 0           | 0.00 |        |
| EG434701 | 0           | 0.00 |        |
| EG434726 | 0           | 0.00 |        |
| EG434727 | 0           | 0.00 |        |
| EG434729 | 0           | 0.00 |        |

|          |             |      |        |
|----------|-------------|------|--------|
| EG434760 | 0           | 0.00 |        |
| EG434764 | 0           | 0.00 |        |
| EG434797 | 0.004148278 | 0.01 | 138.8% |
| EG434881 | 0           | 0.00 |        |
| EG435337 | 0           | 0.00 |        |
| EG435366 | 0.13414092  | 0.04 | 26.6%  |
| EG435864 | 0           | 0.00 |        |
| EG435916 | 0           | 0.00 |        |
| EG435970 | 0.06716176  | 0.02 | 35.6%  |
| EG436240 | 0.6716062   | 0.11 | 16.9%  |
| EG436523 | 0.00900034  | 0.02 | 223.6% |
| EG544710 | 0           | 0.00 |        |
| EG545013 | 0.02501328  | 0.04 | 153.6% |
| EG545047 | 0           | 0.00 |        |
| EG545136 | 0.389208    | 0.09 | 22.3%  |
| EG545253 | 0.6770054   | 0.15 | 22.6%  |
| EG545391 | 1.843182    | 0.19 | 10.1%  |
| EG545477 | 0.0047551   | 0.01 | 223.6% |
| EG545645 | 0           | 0.00 |        |
| EG545728 | 0           | 0.00 |        |
| EG545758 | 0.01812616  | 0.03 | 155.9% |
| EG545861 | 0.002851552 | 0.00 | 137.7% |
| EG545874 | 0           | 0.00 |        |
| EG545893 | 0.02989878  | 0.04 | 137.7% |
| EG545925 | 0           | 0.00 |        |
| EG545929 | 0           | 0.00 |        |
| EG545936 | 0           | 0.00 |        |
| EG545947 | 0           | 0.00 |        |
| EG545952 | 0           | 0.00 |        |
| EG545963 | 0.8425842   | 0.17 | 20.5%  |
| EG546038 | 0           | 0.00 |        |
| EG546150 | 0.00402938  | 0.01 | 223.6% |
| EG546166 | 0.02612676  | 0.02 | 82.0%  |
| EG546282 | 0           | 0.00 |        |
| EG546325 | 0.01023606  | 0.01 | 79.5%  |
| EG546335 | 0           | 0.00 |        |
| EG546347 | 0           | 0.00 |        |
| EG546729 | 0           | 0.00 |        |
| EG546896 | 0.00666434  | 0.01 | 223.6% |
| EG546912 | 0           | 0.00 |        |
| EG546913 | 0           | 0.00 |        |
| EG546981 | 0           | 0.00 |        |
| EG547109 | 0.2004206   | 0.06 | 28.4%  |
| EG547347 | 0.04257952  | 0.02 | 46.5%  |
| EG56544  | 0.3049076   | 0.07 | 21.6%  |
| EG574081 | 0           | 0.00 |        |
| EG574083 | 0           | 0.00 |        |

|          |             |      |        |
|----------|-------------|------|--------|
| EG574403 | 3.112722    | 0.16 | 5.2%   |
| EG574429 | 0.00280988  | 0.01 | 223.6% |
| EG619517 | 0           | 0.00 |        |
| EG619597 | 0.003135492 | 0.00 | 140.7% |
| EG619697 | 0           | 0.00 |        |
| EG619788 | 0           | 0.00 |        |
| EG620592 | 2.877144    | 0.32 | 11.2%  |
| EG620672 | 0           | 0.00 |        |
| EG622139 | 0           | 0.00 |        |
| EG622339 | 0.02230264  | 0.03 | 118.0% |
| EG622408 | 0.0717535   | 0.03 | 36.4%  |
| EG622976 | 0.02454168  | 0.02 | 76.9%  |
| EG623131 | 0.489545    | 0.11 | 21.9%  |
| EG623734 | 0.04515     | 0.05 | 118.2% |
| EG623898 | 0           | 0.00 |        |
| EG624219 | 0.02838718  | 0.03 | 108.4% |
| EG624765 | 0           | 0.00 |        |
| EG624845 | 0           | 0.00 |        |
| EG624855 | 0.041022    | 0.01 | 35.5%  |
| EG624866 | 0.9458052   | 0.19 | 20.2%  |
| EG625029 | 0.00717664  | 0.01 | 140.3% |
| EG625068 | 0.0376995   | 0.01 | 30.4%  |
| EG625109 | 0.014289    | 0.01 | 104.1% |
| EG625131 | 0.14031826  | 0.08 | 57.6%  |
| EG625321 | 0.01015484  | 0.01 | 140.2% |
| EG625424 | 0.00737308  | 0.01 | 142.3% |
| EG625699 | 0           | 0.00 |        |
| EG625716 | 0.03095476  | 0.03 | 97.0%  |
| EG626359 | 0.05838818  | 0.02 | 38.2%  |
| EG626615 | 0           | 0.00 |        |
| EG626942 | 0           | 0.00 |        |
| EG627132 | 0           | 0.00 |        |
| EG627367 | 0           | 0.00 |        |
| EG627479 | 0           | 0.00 |        |
| EG627537 | 0           | 0.00 |        |
| EG627576 | 0           | 0.00 |        |
| EG627636 | 0           | 0.00 |        |
| EG627743 | 0           | 0.00 |        |
| EG627782 | 1.426412    | 0.17 | 11.6%  |
| EG627805 | 0           | 0.00 |        |
| EG627814 | 0           | 0.00 |        |
| EG627927 | 0.00903296  | 0.02 | 223.6% |
| EG628185 | 0           | 0.00 |        |
| EG628416 | 0.00603326  | 0.01 | 137.7% |
| EG628456 | 0           | 0.00 |        |
| EG628518 | 0           | 0.00 |        |
| EG628586 | 0.012268302 | 0.02 | 184.2% |



|          |            |      |        |
|----------|------------|------|--------|
| EG629079 | 0          | 0.00 |        |
| EG629219 | 0          | 0.00 |        |
| EG629678 | 0.06439098 | 0.02 | 36.5%  |
| EG629734 | 0.00601096 | 0.01 | 223.6% |
| EG630499 | 0.23560574 | 0.12 | 52.2%  |
| EG630579 | 1.211438   | 0.13 | 11.1%  |
| EG632671 | 0          | 0.00 |        |
| EG632778 | 0.02795146 | 0.02 | 61.4%  |
| EG633640 | 10.556918  | 0.78 | 7.4%   |
| EG634650 | 0.056698   | 0.03 | 58.4%  |
| EG635895 | 0          | 0.00 |        |
| EG636104 | 0.0026619  | 0.01 | 223.6% |
| EG637004 | 0.00733976 | 0.01 | 138.4% |
| EG637053 | 0          | 0.00 |        |
| EG637908 | 0          | 0.00 |        |
| EG638102 | 0          | 0.00 |        |
| EG638695 | 0          | 0.00 |        |
| EG639396 | 0.04404152 | 0.05 | 103.1% |
| EG639653 | 0.8227644  | 0.12 | 14.8%  |
| EG653016 | 0          | 0.00 |        |
| EG654453 | 0          | 0.00 |        |
| EG654465 | 0          | 0.00 |        |
| EG665186 | 0          | 0.00 |        |
| EG665203 | 0          | 0.00 |        |
| EG665210 | 0          | 0.00 |        |
| EG665227 | 0          | 0.00 |        |
| EG665255 | 0          | 0.00 |        |
| EG665376 | 0          | 0.00 |        |
| EG665378 | 0.00292778 | 0.01 | 223.6% |
| EG666002 | 0          | 0.00 |        |
| EG666085 | 0          | 0.00 |        |
| EG666105 | 0.12616294 | 0.05 | 37.3%  |
| EG667060 | 0.00312914 | 0.01 | 223.6% |
| EG667069 | 0          | 0.00 |        |
| EG667180 | 0          | 0.00 |        |
| EG667283 | 0          | 0.00 |        |
| EG667736 | 0.00756684 | 0.02 | 223.6% |
| EG667977 | 1.345214   | 0.08 | 6.0%   |
| EG668525 | 0.1866156  | 0.08 | 42.9%  |
| EG668668 | 8.119382   | 0.84 | 10.3%  |
| Egf      | 0.15351186 | 0.05 | 33.8%  |
| Egfbp2   | 0          | 0.00 |        |
| Egfl6    | 0.05358214 | 0.02 | 34.7%  |
| Egfl7    | 5.525094   | 0.65 | 11.8%  |
| Egfl8    | 0.41536854 | 0.46 | 109.8% |
| Egflam   | 1.869712   | 0.31 | 16.3%  |
| Egfr     | 2.43575    | 0.27 | 11.0%  |

|         |            |      |       |
|---------|------------|------|-------|
| Egln1   | 21.7726    | 1.33 | 6.1%  |
| Egln2   | 23.09018   | 0.85 | 3.7%  |
| Egln3   | 3.78182    | 0.82 | 21.6% |
| Egr1    | 8.08625    | 1.07 | 13.3% |
| Egr2    | 0.1923304  | 0.05 | 26.2% |
| Egr3    | 0.6423558  | 0.08 | 12.6% |
| Egr4    | 0.7547634  | 0.14 | 19.0% |
| Ehbp1   | 10.6908    | 0.48 | 4.5%  |
| Ehbp1l1 | 1.1885036  | 0.23 | 19.3% |
| Ehd1    | 17.7601    | 2.22 | 12.5% |
| Ehd2    | 1.2809824  | 0.25 | 19.5% |
| Ehd3    | 22.51668   | 0.75 | 3.3%  |
| Ehd4    | 4.98133    | 0.24 | 4.7%  |
| Ehf     | 0.05618484 | 0.03 | 48.4% |
| Ehhadh  | 0.1918736  | 0.04 | 23.3% |
| Ehmt1   | 7.942198   | 0.49 | 6.1%  |
| Ehmt2   | 28.61986   | 0.80 | 2.8%  |
| Ei24    | 45.3275    | 2.76 | 6.1%  |
| Eid1    | 61.33034   | 4.35 | 7.1%  |
| Eid2    | 20.04886   | 0.82 | 4.1%  |
| Eid3    | 0.02360436 | 0.01 | 61.4% |
| Eif1    | 51.90262   | 4.93 | 9.5%  |
| Eif1a   | 26.27196   | 1.81 | 6.9%  |
| Eif1ay  | 40.10922   | 1.11 | 2.8%  |
| Eif1b   | 61.18594   | 3.48 | 5.7%  |
| Eif2a   | 15.2093    | 0.51 | 3.4%  |
| Eif2ak1 | 15.14478   | 1.10 | 7.3%  |
| Eif2ak2 | 2.408502   | 0.25 | 10.2% |
| Eif2ak3 | 7.048756   | 0.31 | 4.4%  |
| Eif2ak4 | 4.100316   | 0.17 | 4.2%  |
| Eif2b1  | 9.86451    | 0.44 | 4.5%  |
| Eif2b2  | 11.02176   | 0.99 | 9.0%  |
| Eif2b3  | 9.90362    | 1.27 | 12.8% |
| Eif2b4  | 13.61408   | 0.61 | 4.5%  |
| Eif2b5  | 24.4206    | 2.20 | 9.0%  |
| Eif2c1  | 10.361218  | 0.37 | 3.5%  |
| Eif2c2  | 16.99222   | 2.74 | 16.1% |
| Eif2c3  | 0.8740222  | 0.16 | 18.6% |
| Eif2c4  | 1.0856608  | 0.18 | 17.0% |
| Eif2s1  | 9.396228   | 0.64 | 6.8%  |
| Eif2s2  | 19.22954   | 1.91 | 9.9%  |
| Eif2s3x | 5.648674   | 0.46 | 8.2%  |
| Eif2s3y | 0.7551886  | 0.11 | 14.7% |
| Eif3b   | 33.58834   | 2.34 | 7.0%  |
| Eif3c   | 57.86146   | 4.55 | 7.9%  |
| Eif3d   | 37.97342   | 4.00 | 10.5% |
| Eif3e   | 15.36546   | 1.22 | 7.9%  |

|           |            |      |        |
|-----------|------------|------|--------|
| Eif3eip   | 53.88522   | 4.37 | 8.1%   |
| Eif3f     | 61.38556   | 4.46 | 7.3%   |
| Eif3g     | 30.1156    | 2.08 | 6.9%   |
| Eif3h     | 53.23096   | 4.34 | 8.2%   |
| Eif3i     | 25.43888   | 2.09 | 8.2%   |
| Eif3j     | 1.247462   | 0.10 | 7.7%   |
| Eif3k     | 46.50816   | 4.08 | 8.8%   |
| Eif3m     | 12.774     | 0.96 | 7.5%   |
| Eif3s10   | 56.90678   | 2.50 | 4.4%   |
| Eif3s12   | 1.058503   | 0.42 | 39.6%  |
| Eif3s2    | 0.09810208 | 0.03 | 29.8%  |
| Eif4a1    | 15.12294   | 1.59 | 10.5%  |
| Eif4a2    | 148.2048   | 4.30 | 2.9%   |
| Eif4a3    | 8.539842   | 0.51 | 6.0%   |
| Eif4b     | 55.8167    | 1.12 | 2.0%   |
| Eif4e     | 20.3365    | 1.26 | 6.2%   |
| Eif4e1b   | 0          | 0.00 |        |
| Eif4e2    | 32.16002   | 1.13 | 3.5%   |
| Eif4e3    | 3.28587    | 0.25 | 7.6%   |
| Eif4ebp1  | 2.481344   | 0.61 | 24.4%  |
| Eif4ebp2  | 10.624532  | 1.15 | 10.8%  |
| Eif4ebp3  | 3.11296    | 0.23 | 7.5%   |
| Eif4enif1 | 9.812012   | 0.63 | 6.4%   |
| Eif4g1    | 75.30158   | 2.85 | 3.8%   |
| Eif4g2    | 141.966    | 5.30 | 3.7%   |
| Eif4g3    | 38.19908   | 0.31 | 0.8%   |
| Eif4h     | 95.8919    | 1.95 | 2.0%   |
| Eif5      | 61.41338   | 1.45 | 2.4%   |
| Eif5a     | 82.91286   | 6.24 | 7.5%   |
| Eif5a2    | 18.69902   | 1.11 | 5.9%   |
| Eif5b     | 8.893386   | 0.36 | 4.1%   |
| Eif6      | 22.0729    | 2.07 | 9.4%   |
| Ela1      | 0.09565484 | 0.04 | 44.4%  |
| Ela2      | 0.00751372 | 0.02 | 223.6% |
| Ela2a     | 0.19023806 | 0.41 | 217.5% |
| Ela3      | 0.0061661  | 0.01 | 223.6% |
| Elac1     | 7.241264   | 0.53 | 7.3%   |
| Elac2     | 6.766858   | 0.22 | 3.2%   |
| Elavl1    | 13.9055    | 0.46 | 3.3%   |
| Elavl2    | 53.2177    | 2.73 | 5.1%   |
| Elavl3    | 59.60518   | 2.53 | 4.2%   |
| Elavl4    | 43.26416   | 2.38 | 5.5%   |
| Elf1      | 3.439566   | 0.50 | 14.6%  |
| Elf2      | 6.142406   | 0.40 | 6.5%   |
| ELF2      | 0.22381078 | 0.10 | 45.9%  |
| Elf3      | 0.6534576  | 0.21 | 32.3%  |
| Elf4      | 0.1988152  | 0.07 | 32.8%  |

|         |            |      |        |
|---------|------------|------|--------|
| Elf5    | 0.0122767  | 0.01 | 93.8%  |
| Elk1    | 13.9836    | 2.96 | 21.2%  |
| Elk3    | 1.459848   | 0.16 | 10.8%  |
| Elk4    | 2.561834   | 0.32 | 12.6%  |
| ElI     | 3.795856   | 0.24 | 6.4%   |
| ElI2    | 3.79899    | 0.34 | 9.1%   |
| ElI3    | 0.2128488  | 0.05 | 23.4%  |
| Elm1    | 0.5426806  | 0.24 | 43.7%  |
| Elmo1   | 49.36488   | 2.90 | 5.9%   |
| Elmo2   | 13.3596    | 0.50 | 3.8%   |
| Elmo3   | 0.4741638  | 0.03 | 6.9%   |
| Elmod1  | 49.54168   | 2.13 | 4.3%   |
| Elmod2  | 12.75842   | 0.64 | 5.0%   |
| Eln     | 2.303532   | 0.88 | 38.2%  |
| Elof1   | 20.92366   | 2.54 | 12.1%  |
| Elovl1  | 2.619776   | 0.41 | 15.8%  |
| Elovl2  | 5.731724   | 1.01 | 17.7%  |
| Elovl3  | 0.00347938 | 0.01 | 223.6% |
| Elovl4  | 78.4401    | 3.34 | 4.3%   |
| Elovl5  | 29.02216   | 2.36 | 8.1%   |
| Elovl6  | 28.32036   | 3.71 | 13.1%  |
| Elovl7  | 1.2494486  | 0.23 | 18.1%  |
| ELP     | 0.0064363  | 0.01 | 223.6% |
| Elp2    | 34.64892   | 1.63 | 4.7%   |
| Elp3    | 36.08646   | 2.80 | 7.8%   |
| Elp4    | 5.365342   | 0.27 | 4.9%   |
| Eltd1   | 0.01331845 | 0.00 | 35.5%  |
| Emb     | 9.054696   | 0.64 | 7.1%   |
| Emcn    | 0.05198596 | 0.05 | 87.0%  |
| Emd     | 31.7215    | 2.94 | 9.3%   |
| Eme1    | 0.1328862  | 0.02 | 14.5%  |
| Eme2    | 6.861636   | 1.15 | 16.8%  |
| Emg1    | 11.50532   | 0.63 | 5.5%   |
| Emid1   | 1.88952    | 0.34 | 17.9%  |
| Emid2   | 6.58917    | 1.33 | 20.2%  |
| Emilin1 | 1.624906   | 0.29 | 17.8%  |
| Emilin2 | 1.115164   | 0.05 | 4.5%   |
| Emilin3 | 0.2331876  | 0.03 | 12.8%  |
| Eml1    | 7.566408   | 0.53 | 6.9%   |
| Eml2    | 41.54076   | 2.78 | 6.7%   |
| Eml3    | 3.366624   | 0.69 | 20.4%  |
| Eml4    | 8.777388   | 0.20 | 2.2%   |
| Eml5    | 4.214722   | 0.45 | 10.8%  |
| Emp1    | 14.51076   | 2.61 | 18.0%  |
| Emp2    | 1.721648   | 0.19 | 11.2%  |
| Emp3    | 1.0930684  | 0.47 | 43.4%  |
| Emr1    | 0.03508104 | 0.03 | 84.3%  |

|                    |             |       |        |
|--------------------|-------------|-------|--------|
| Emr4               | 0.01997116  | 0.01  | 44.7%  |
| Emx1               | 0.5868536   | 0.15  | 25.6%  |
| Emx2               | 0.8423228   | 0.15  | 17.2%  |
| Emzf1              | 0.14300214  | 0.07  | 51.8%  |
| En1                | 4.449082    | 0.23  | 5.1%   |
| En2                | 0.820613    | 0.16  | 20.0%  |
| Enah               | 20.48424    | 0.84  | 4.1%   |
| Enam               | 0           | 0.00  |        |
| Enc1               | 36.24316    | 3.08  | 8.5%   |
| Endod1             | 45.2907     | 1.26  | 2.8%   |
| Endog              | 7.879156    | 0.61  | 7.7%   |
| Endogl1            | 8.75655     | 0.71  | 8.1%   |
| Eng                | 0.054278368 | 0.03  | 61.0%  |
| Eno1               | 2.078816    | 0.61  | 29.1%  |
| Eno2               | 348.5066    | 21.95 | 6.3%   |
| Eno3               | 3.63719     | 0.30  | 8.3%   |
| ENO3               | 0.4662322   | 0.44  | 93.6%  |
| Enoph1             | 13.43292    | 0.70  | 5.2%   |
| Enox1              | 8.581036    | 0.23  | 2.7%   |
| Enox2              | 4.221594    | 0.28  | 6.7%   |
| Enpep              | 0.20020088  | 0.07  | 34.4%  |
| Enpp1              | 0.910251    | 0.11  | 12.0%  |
| Enpp2              | 7.95412     | 0.45  | 5.7%   |
| Enpp3              | 0.1801524   | 0.06  | 31.3%  |
| Enpp4              | 2.6969      | 0.10  | 3.5%   |
| Enpp5              | 101.63956   | 4.27  | 4.2%   |
| Enpp6              | 0.1149162   | 0.09  | 75.4%  |
| Enpp7              | 0           | 0.00  |        |
| Ensa               | 78.64626    | 2.37  | 3.0%   |
| ENSMUSG00000033219 | 0           | 0.00  |        |
| ENSMUSG00000043661 | 0.0967146   | 0.11  | 115.2% |
| ENSMUSG00000048936 | 5.510494    | 0.61  | 11.1%  |
| ENSMUSG00000052469 | 0.005192248 | 0.01  | 148.5% |
| ENSMUSG00000053178 | 0.4006514   | 0.09  | 23.4%  |
| ENSMUSG00000058057 | 0.01982688  | 0.02  | 103.1% |
| ENSMUSG00000058934 | 0.00954074  | 0.02  | 223.6% |
| ENSMUSG00000068790 | 0           | 0.00  |        |
| ENSMUSG00000072602 | 0           | 0.00  |        |
| ENSMUSG00000073257 | 0           | 0.00  |        |
| Ent1               | 0.4779198   | 0.10  | 21.3%  |
| Entpd1             | 0.2497062   | 0.07  | 26.9%  |
| Entpd2             | 0.6888796   | 0.29  | 42.8%  |
| Entpd3             | 1.2552538   | 0.24  | 19.1%  |
| Entpd4             | 24.88428    | 2.25  | 9.0%   |
| Entpd5             | 5.920552    | 0.24  | 4.0%   |
| Entpd6             | 26.18208    | 1.00  | 3.8%   |
| Entpd7             | 4.177466    | 0.18  | 4.4%   |

|           |             |      |        |
|-----------|-------------|------|--------|
| Entpd8    | 0.00574458  | 0.01 | 138.4% |
| env       | 0           | 0.00 |        |
| Eny2      | 18.92854    | 1.13 | 6.0%   |
| Eomes     | 0.03611542  | 0.02 | 67.5%  |
| ep        | 0.6990302   | 0.26 | 37.6%  |
| Ep300     | 9.069894    | 0.34 | 3.8%   |
| Ep400     | 7.098702    | 0.63 | 8.9%   |
| Epas1     | 1.801066    | 0.32 | 17.7%  |
| Epb4.1    | 13.69122    | 1.10 | 8.0%   |
| Epb4.111  | 75.21048    | 1.52 | 2.0%   |
| Epb4.112  | 12.098652   | 2.40 | 19.9%  |
| Epb4.113  | 105.5484    | 3.53 | 3.3%   |
| Epb4.114a | 2.077752    | 0.40 | 19.1%  |
| Epb4.114b | 2.138938    | 0.24 | 11.2%  |
| Epb4.115  | 2.299114    | 0.29 | 12.7%  |
| Epb4.2    | 0.00285128  | 0.01 | 223.6% |
| Epb4.9    | 71.16162    | 3.40 | 4.8%   |
| Epc1      | 11.36796    | 0.82 | 7.2%   |
| Epc2      | 10.297254   | 0.39 | 3.8%   |
| Epdr1     | 15.4602     | 1.70 | 11.0%  |
| Epdr2     | 0.6040046   | 0.49 | 81.3%  |
| Epgn      | 0.02100664  | 0.02 | 118.4% |
| Epha1     | 0.161001    | 0.04 | 27.1%  |
| Epha10    | 1.0355368   | 0.14 | 13.8%  |
| Epha2     | 0.13915316  | 0.05 | 38.8%  |
| Epha3     | 1.820182    | 0.23 | 12.7%  |
| Epha4     | 19.68948    | 0.50 | 2.5%   |
| Epha5     | 22.46038    | 1.31 | 5.8%   |
| Epha6     | 1.988094    | 0.43 | 21.8%  |
| Epha7     | 5.587076    | 0.37 | 6.6%   |
| Epha8     | 2.004284    | 0.12 | 6.0%   |
| Ephb1     | 13.71008    | 1.47 | 10.7%  |
| Ephb2     | 7.090094    | 0.69 | 9.8%   |
| Ephb3     | 1.700612    | 0.18 | 10.5%  |
| Ephb4     | 1.27069     | 0.12 | 9.5%   |
| Ephb6     | 9.982844    | 0.30 | 3.0%   |
| Ephx1     | 15.33754    | 1.54 | 10.0%  |
| Ephx2     | 0.4384448   | 0.03 | 6.5%   |
| Epm2a     | 7.245046    | 0.76 | 10.5%  |
| Epm2aip1  | 77.97824    | 2.01 | 2.6%   |
| Epn1      | 78.7515     | 4.12 | 5.2%   |
| Epn2      | 11.45534    | 0.45 | 3.9%   |
| Epn3      | 0.06681174  | 0.02 | 26.1%  |
| Epo       | 0           | 0.00 |        |
| Epor      | 0.223977    | 0.03 | 12.0%  |
| Eppk1     | 0.000970284 | 0.00 | 138.8% |
| Eprs      | 34.02178    | 2.20 | 6.5%   |

|         |             |      |        |
|---------|-------------|------|--------|
| Eps15   | 60.83744    | 2.89 | 4.8%   |
| Eps15l1 | 18.36774    | 0.45 | 2.4%   |
| Eps8    | 3.470762    | 0.29 | 8.2%   |
| Eps8l1  | 0.10453552  | 0.03 | 28.6%  |
| Eps8l2  | 0.07258334  | 0.03 | 42.0%  |
| Eps8l3  | 0.0152734   | 0.00 | 24.3%  |
| Eps8R1  | 0.032121445 | 0.02 | 58.9%  |
| Epsti1  | 0.00455372  | 0.01 | 223.6% |
| Epx     | 0.02603478  | 0.02 | 88.1%  |
| Epyc    | 0.00987292  | 0.01 | 138.6% |
| Eral1   | 9.293994    | 0.54 | 5.9%   |
| Eras    | 0.0262193   | 0.02 | 61.4%  |
| Erbb2   | 0.6428446   | 0.09 | 14.6%  |
| Erbb2ip | 8.15017     | 0.38 | 4.7%   |
| Erbb3   | 0.05494122  | 0.01 | 20.9%  |
| Erbb4   | 1.4778106   | 0.32 | 21.3%  |
| erbB4   | 0.2461624   | 0.13 | 53.4%  |
| Erc1    | 16.55554    | 2.35 | 14.2%  |
| Erc2    | 16.87308    | 1.03 | 6.1%   |
| Ercc1   | 5.294606    | 0.40 | 7.6%   |
| Ercc2   | 4.127352    | 0.57 | 13.9%  |
| Ercc3   | 9.959114    | 0.61 | 6.2%   |
| Ercc4   | 6.466704    | 0.31 | 4.8%   |
| Ercc5   | 4.472124    | 0.23 | 5.1%   |
| Ercc6   | 1.863158    | 0.07 | 3.8%   |
| Ercc6l  | 0.2643006   | 0.05 | 18.6%  |
| Ercc8   | 3.621964    | 0.84 | 23.3%  |
| Erd2.1  | 0.378664    | 0.20 | 52.8%  |
| Ereg    | 0.00228474  | 0.01 | 223.6% |
| Erf     | 0.89803     | 0.18 | 19.9%  |
| Erg     | 0.01998142  | 0.02 | 89.2%  |
| erg3    | 0.037232916 | 0.04 | 114.4% |
| Ergic1  | 38.17256    | 1.95 | 5.1%   |
| Ergic2  | 12.39612    | 1.09 | 8.8%   |
| Ergic3  | 59.9194     | 4.56 | 7.6%   |
| Erh     | 7.842806    | 0.99 | 12.7%  |
| Erich1  | 3.161414    | 0.15 | 4.8%   |
| Erlin1  | 5.82882     | 0.25 | 4.3%   |
| Erlin2  | 16.27096    | 0.73 | 4.5%   |
| Ermap   | 0.03422742  | 0.02 | 50.7%  |
| Ermp1   | 21.41148    | 0.50 | 2.4%   |
| Ern1    | 1.390334    | 0.14 | 10.0%  |
| Ern2    | 0.0439398   | 0.03 | 69.6%  |
| Ero1l   | 10.378946   | 1.27 | 12.3%  |
| Ero1lb  | 3.46472     | 0.29 | 8.4%   |
| Erp27   | 0.00602122  | 0.01 | 223.6% |
| Erp29   | 47.8752     | 3.08 | 6.4%   |

|        |            |      |        |
|--------|------------|------|--------|
| Errfi1 | 10.248638  | 0.71 | 6.9%   |
| ErT-1  | 0.00319026 | 0.01 | 223.6% |
| Es1    | 0          | 0.00 |        |
| Es113  | 0.4267442  | 0.17 | 38.8%  |
| Es22   | 0.00298028 | 0.01 | 223.6% |
| Es2el  | 5.637244   | 0.14 | 2.5%   |
| Es31   | 0          | 0.00 |        |
| Esam   | 0.09565498 | 0.06 | 61.0%  |
| Esam1  | 0.10544642 | 0.04 | 38.6%  |
| Esco1  | 4.89338    | 0.26 | 5.3%   |
| Esco2  | 0.420283   | 0.16 | 38.5%  |
| Esd    | 9.261666   | 0.29 | 3.1%   |
| Esf1   | 7.865046   | 0.17 | 2.2%   |
| Esm1   | 0.0083295  | 0.01 | 138.2% |
| Espl1  | 0.3379176  | 0.06 | 16.5%  |
| Espn   | 0.2532432  | 0.06 | 23.5%  |
| Espnl  | 0.01557333 | 0.01 | 58.1%  |
| Esr1   | 0.1306096  | 0.01 | 11.2%  |
| Esr2   | 0.02757668 | 0.01 | 37.2%  |
| Esrra  | 12.53852   | 0.82 | 6.6%   |
| Esrrb  | 1.190596   | 0.10 | 8.0%   |
| Esrrg  | 13.36036   | 0.72 | 5.4%   |
| Esx1   | 0.07818914 | 0.04 | 52.7%  |
| ET     | 2.798896   | 0.89 | 31.7%  |
| Etaa1  | 2.940724   | 0.32 | 10.8%  |
| Etd    | 0          | 0.00 |        |
| Etf1   | 28.89432   | 1.54 | 5.3%   |
| Etfa   | 9.555836   | 0.46 | 4.8%   |
| Etfb   | 14.15958   | 0.79 | 5.6%   |
| Etfdh  | 9.799948   | 0.20 | 2.0%   |
| Ethe1  | 3.566028   | 0.24 | 6.8%   |
| Etl4   | 9.212386   | 0.84 | 9.2%   |
| Etnk1  | 69.55944   | 5.03 | 7.2%   |
| Etnk2  | 0.683925   | 0.19 | 27.6%  |
| Etohi1 | 0.3098522  | 0.06 | 17.8%  |
| etoile | 7.190358   | 1.11 | 15.4%  |
| Ets1   | 1.68488    | 0.27 | 16.3%  |
| Ets2   | 8.615736   | 1.00 | 11.7%  |
| Etv1   | 1.282226   | 0.12 | 9.7%   |
| Etv2   | 0.00468668 | 0.01 | 223.6% |
| Etv3   | 2.774004   | 0.19 | 6.9%   |
| Etv4   | 2.73602    | 0.24 | 8.6%   |
| Etv5   | 7.26867    | 0.56 | 7.7%   |
| Etv6   | 2.247088   | 0.12 | 5.4%   |
| Evc    | 1.430968   | 0.31 | 21.4%  |
| Evc2   | 1.0959604  | 0.16 | 14.8%  |
| Evi1   | 1.191208   | 0.20 | 16.8%  |



|         |             |      |        |
|---------|-------------|------|--------|
| evi-1   | 0.07177486  | 0.05 | 67.7%  |
| Evi27   | 0.021926952 | 0.01 | 57.2%  |
| Evi2a   | 0.01061052  | 0.01 | 94.9%  |
| Evi2b   | 0.00209858  | 0.00 | 223.6% |
| Evi5    | 13.76538    | 1.30 | 9.4%   |
| Evl     | 67.44078    | 3.10 | 4.6%   |
| Evl1    | 0.9707336   | 0.43 | 43.9%  |
| Evpl    | 0.03237212  | 0.02 | 59.2%  |
| Evx1    | 0.8982492   | 0.18 | 20.0%  |
| Evx2    | 0.296704    | 0.03 | 11.7%  |
| Ewsr1   | 24.4424     | 1.48 | 6.1%   |
| Exdl1   | 0.599738    | 0.03 | 5.7%   |
| Exdl2   | 10.512038   | 1.21 | 11.5%  |
| Exo1    | 0.3035726   | 0.08 | 25.0%  |
| Exoc1   | 15.68772    | 1.00 | 6.4%   |
| Exoc2   | 12.60994    | 0.61 | 4.9%   |
| Exoc3   | 26.03862    | 0.48 | 1.8%   |
| Exoc3l  | 0.5116226   | 0.11 | 21.9%  |
| Exoc3l2 | 0.788146    | 0.18 | 22.5%  |
| Exoc4   | 22.63748    | 0.92 | 4.1%   |
| Exoc5   | 14.31966    | 1.23 | 8.6%   |
| Exoc6   | 10.539818   | 1.08 | 10.2%  |
| Exoc7   | 26.64806    | 1.29 | 4.8%   |
| Exoc8   | 5.1856      | 0.19 | 3.6%   |
| Exod1   | 1.242202    | 0.52 | 41.5%  |
| Exosc1  | 9.450436    | 0.66 | 7.0%   |
| Exosc10 | 13.4108     | 0.57 | 4.2%   |
| Exosc2  | 8.228292    | 0.77 | 9.4%   |
| Exosc3  | 4.128538    | 0.10 | 2.4%   |
| Exosc4  | 7.431284    | 0.49 | 6.6%   |
| Exosc5  | 4.938586    | 0.44 | 8.9%   |
| Exosc6  | 3.149022    | 0.35 | 11.0%  |
| Exosc7  | 9.16934     | 0.99 | 10.8%  |
| Exosc8  | 5.387242    | 0.44 | 8.1%   |
| Exosc9  | 9.511742    | 0.95 | 10.0%  |
| Exph5   | 0.02859642  | 0.01 | 35.8%  |
| Expi    | 0           | 0.00 |        |
| Ext1    | 10.469162   | 1.19 | 11.3%  |
| Ext2    | 16.38042    | 0.95 | 5.8%   |
| Extl1   | 0.5167236   | 0.06 | 11.8%  |
| Extl2   | 34.6804     | 1.18 | 3.4%   |
| Extl3   | 23.83848    | 0.48 | 2.0%   |
| Eya1    | 3.089622    | 0.26 | 8.3%   |
| Eya2    | 1.763358    | 0.23 | 13.0%  |
| Eya3    | 4.47911     | 0.10 | 2.2%   |
| Eya4    | 0.1378738   | 0.04 | 25.5%  |
| Ezh1    | 11.39252    | 0.52 | 4.6%   |

|               |            |       |        |
|---------------|------------|-------|--------|
| Ezh2          | 1.590546   | 0.33  | 20.8%  |
| F10           | 0.00340312 | 0.01  | 223.6% |
| F11           | 0          | 0.00  |        |
| F11r          | 0.996254   | 0.17  | 17.4%  |
| F12           | 0.00282232 | 0.01  | 223.6% |
| F13a1         | 0.07239382 | 0.06  | 76.7%  |
| F13b          | 0          | 0.00  |        |
| F2            | 0.07136964 | 0.07  | 93.2%  |
| F2r           | 10.024806  | 0.66  | 6.6%   |
| F2r1          | 0.09559132 | 0.05  | 51.3%  |
| F2r12         | 0.0975285  | 0.05  | 52.0%  |
| F2r13         | 0.2417661  | 0.10  | 42.7%  |
| F3            | 2.669986   | 0.42  | 15.7%  |
| F430201B04Rik | 0.0030885  | 0.01  | 223.6% |
| F5            | 0.00000252 | 0.00  | 223.6% |
| F630043A04Rik | 0.6985048  | 0.14  | 19.6%  |
| F630110N24Rik | 13.8391    | 1.05  | 7.6%   |
| F7            | 0.00404912 | 0.01  | 223.6% |
| F730014I05Rik | 8.118682   | 0.54  | 6.7%   |
| F730015K02Rik | 7.090608   | 0.85  | 12.0%  |
| F730031O20Rik | 0.153942   | 0.04  | 28.6%  |
| F730047E07Rik | 0.4056202  | 0.09  | 22.9%  |
| F8            | 0.5532824  | 0.03  | 6.1%   |
| F830021D11Rik | 7.292422   | 0.13  | 1.8%   |
| F830045P16Rik | 0          | 0.00  |        |
| F830104D24Rik | 0          | 0.00  |        |
| F830116E18Rik | 0          | 0.00  |        |
| F8a           | 7.398652   | 0.41  | 5.6%   |
| F9            | 0          | 0.00  |        |
| F930017I19Rik | 3.775344   | 3.28  | 86.9%  |
| F930104E18Rik | 0.014512   | 0.02  | 104.8% |
| Fa2h          | 0.11144188 | 0.05  | 45.6%  |
| Faah          | 4.8979     | 0.29  | 5.9%   |
| Fabp1         | 0          | 0.00  |        |
| Fabp2         | 0.00851618 | 0.02  | 223.6% |
| Fabp3         | 5.948526   | 1.24  | 20.8%  |
| Fabp4         | 0.10468336 | 0.11  | 104.4% |
| Fabp5         | 7.974686   | 0.61  | 7.6%   |
| Fabp6         | 0          | 0.00  |        |
| Fabp7         | 168.401    | 16.78 | 10.0%  |
| Fabp9         | 0          | 0.00  |        |
| Face-2        | 2.69973    | 0.87  | 32.1%  |
| fad123        | 0.10000932 | 0.04  | 39.5%  |
| Fadd          | 0.8905784  | 0.08  | 9.2%   |
| Fads1         | 76.06134   | 6.23  | 8.2%   |
| Fads2         | 78.95802   | 9.69  | 12.3%  |
| Fads3         | 17.82188   | 0.55  | 3.1%   |

|         |            |      |        |
|---------|------------|------|--------|
| Fads6   | 1.443518   | 0.25 | 17.3%  |
| FAE     | 3.444974   | 1.09 | 31.7%  |
| Faf1    | 18.02808   | 0.97 | 5.4%   |
| Fah     | 1.539692   | 0.29 | 18.7%  |
| Fahd1   | 6.400562   | 0.34 | 5.3%   |
| Fahd2a  | 6.592596   | 0.42 | 6.3%   |
| Faim    | 17.61352   | 0.84 | 4.8%   |
| Faim2   | 34.8838    | 7.51 | 21.5%  |
| Faim3   | 0.02182132 | 0.03 | 127.6% |
| FAK     | 1.451908   | 0.29 | 20.1%  |
| Fam100a | 27.568     | 2.77 | 10.0%  |
| Fam101b | 1.231847   | 0.15 | 12.4%  |
| Fam102b | 9.201266   | 0.83 | 9.0%   |
| Fam105b | 2.496448   | 0.50 | 20.0%  |
| Fam112b | 0.01765642 | 0.02 | 139.2% |
| Fam113a | 3.449212   | 0.31 | 8.9%   |
| Fam122b | 1.053096   | 0.49 | 46.3%  |
| Fam18b  | 14.59096   | 0.67 | 4.6%   |
| Fam46c  | 0.2943908  | 0.09 | 30.8%  |
| Fam4a2  | 0.4693204  | 0.29 | 61.6%  |
| Fam50b  | 0.0066401  | 0.01 | 138.0% |
| Fam55d  | 0.365836   | 0.03 | 9.2%   |
| Fam57b  | 62.3476    | 4.18 | 6.7%   |
| Fam76b  | 0.5832766  | 0.08 | 13.9%  |
| Fam77D  | 4.412456   | 0.53 | 11.9%  |
| Fam83d  | 0.4544494  | 0.04 | 8.2%   |
| Fanca   | 2.879666   | 0.76 | 26.2%  |
| Fancc   | 0.5241506  | 0.06 | 11.8%  |
| Fancc   | 1.917154   | 0.44 | 22.9%  |
| Fancc2  | 0.2047424  | 0.05 | 25.5%  |
| Fance   | 4.17093    | 0.36 | 8.7%   |
| Fancg   | 3.830696   | 0.29 | 7.5%   |
| Fanci   | 0.522136   | 0.26 | 49.1%  |
| Fancl   | 2.4143     | 0.57 | 23.6%  |
| Fancm   | 2.220474   | 0.13 | 5.7%   |
| Fank1   | 0.8510952  | 0.07 | 8.5%   |
| Fap     | 2.015254   | 0.25 | 12.6%  |
| Farp1   | 9.345538   | 0.81 | 8.7%   |
| Farp2   | 2.222852   | 0.19 | 8.5%   |
| Fars2   | 5.049536   | 0.17 | 3.3%   |
| Farsa   | 1.613036   | 0.52 | 32.1%  |
| Farsb   | 32.44114   | 3.10 | 9.6%   |
| Farsla  | 18.03642   | 1.40 | 7.7%   |
| Farslb  | 4.036032   | 1.08 | 26.8%  |
| Fas     | 0.6434612  | 0.09 | 14.0%  |
| Fasl    | 0.6362474  | 0.11 | 16.7%  |
| Fasn    | 53.88096   | 5.64 | 10.5%  |

|         |            |      |        |
|---------|------------|------|--------|
| Fastk   | 25.3183    | 1.08 | 4.3%   |
| Fastkd1 | 7.805544   | 0.28 | 3.6%   |
| Fastkd2 | 6.280166   | 0.46 | 7.3%   |
| Fastkd3 | 3.711526   | 0.19 | 5.2%   |
| Fastkd5 | 2.784476   | 0.18 | 6.5%   |
| Fat1    | 3.637354   | 0.49 | 13.4%  |
| Fat2    | 0          | 0.00 |        |
| Fat3    | 2.855718   | 0.25 | 8.6%   |
| Fat4    | 1.32065    | 0.15 | 11.4%  |
| Fate1   | 0.01402084 | 0.02 | 137.6% |
| Fath    | 7.335214   | 0.79 | 10.8%  |
| Fau     | 2.352224   | 0.58 | 24.6%  |
| Fba     | 10.440318  | 1.16 | 11.1%  |
| Fbf1    | 9.631266   | 0.34 | 3.5%   |
| Fbl     | 1.0179848  | 0.17 | 17.2%  |
| Fblim1  | 3.231538   | 0.27 | 8.4%   |
| Fbln1   | 6.416948   | 1.46 | 22.7%  |
| Fbln2   | 0.9554626  | 0.39 | 40.4%  |
| Fbln5   | 1.425138   | 0.25 | 17.6%  |
| Fbn1    | 4.454418   | 0.99 | 22.3%  |
| Fbn2    | 3.43498    | 0.80 | 23.2%  |
| Fbp1    | 0.159899   | 0.05 | 33.8%  |
| FBP11   | 0.04637644 | 0.03 | 56.4%  |
| Fbp2    | 0.0285457  | 0.04 | 130.4% |
| Fbs1    | 9.462046   | 0.59 | 6.3%   |
| Fbxl10  | 9.32996    | 1.27 | 13.6%  |
| Fbxl11  | 18.87146   | 2.97 | 15.7%  |
| Fbxl12  | 6.714448   | 1.27 | 18.9%  |
| Fbxl13  | 0.30233232 | 0.66 | 219.3% |
| Fbxl14  | 5.473444   | 0.36 | 6.6%   |
| Fbxl15  | 11.1694    | 0.75 | 6.8%   |
| Fbxl16  | 61.97994   | 1.54 | 2.5%   |
| Fbxl17  | 25.46118   | 1.59 | 6.2%   |
| Fbxl18  | 7.09938    | 0.18 | 2.5%   |
| Fbxl19  | 24.9489    | 2.20 | 8.8%   |
| Fbxl2   | 11.83694   | 0.42 | 3.6%   |
| Fbxl20  | 8.462376   | 0.80 | 9.4%   |
| Fbxl21  | 1.5908     | 0.10 | 6.6%   |
| Fbxl22  | 0.04582206 | 0.01 | 22.7%  |
| Fbxl3   | 9.201872   | 0.29 | 3.2%   |
| Fbxl4   | 10.73744   | 0.68 | 6.3%   |
| Fbxl5   | 14.63      | 0.63 | 4.3%   |
| Fbxl6   | 8.80081    | 0.44 | 5.0%   |
| Fbxl7   | 1.414924   | 0.07 | 5.3%   |
| Fbxl8   | 0.8165724  | 0.11 | 13.4%  |
| Fbxo10  | 9.606834   | 0.91 | 9.5%   |
| Fbxo11  | 40.30566   | 2.17 | 5.4%   |

|        |             |      |        |
|--------|-------------|------|--------|
| Fbxo15 | 0.1161999   | 0.03 | 27.7%  |
| Fbxo16 | 4.64191     | 0.51 | 11.1%  |
| Fbxo17 | 0.09673478  | 0.05 | 56.0%  |
| Fbxo18 | 25.74014    | 0.88 | 3.4%   |
| Fbxo2  | 32.01648    | 2.37 | 7.4%   |
| Fbxo21 | 36.82516    | 0.52 | 1.4%   |
| Fbxo22 | 15.0008     | 1.24 | 8.3%   |
| Fbxo24 | 0.06561014  | 0.02 | 31.8%  |
| Fbxo25 | 27.08148    | 0.77 | 2.8%   |
| Fbxo27 | 1.883512    | 0.23 | 12.1%  |
| Fbxo28 | 9.94188     | 0.13 | 1.3%   |
| Fbxo3  | 37.3325     | 0.96 | 2.6%   |
| Fbxo30 | 3.31365     | 0.29 | 8.7%   |
| Fbxo31 | 28.07696    | 1.24 | 4.4%   |
| Fbxo32 | 0.6078096   | 0.18 | 29.4%  |
| Fbxo33 | 4.981574    | 0.66 | 13.3%  |
| Fbxo34 | 10.49696    | 0.23 | 2.1%   |
| Fbxo36 | 1.491506    | 0.43 | 28.7%  |
| Fbxo38 | 11.74292    | 0.45 | 3.9%   |
| Fbxo39 | 0.12554594  | 0.06 | 45.7%  |
| Fbxo4  | 2.058724    | 0.20 | 9.9%   |
| Fbxo40 | 0.01348282  | 0.01 | 66.3%  |
| Fbxo41 | 21.26838    | 0.63 | 3.0%   |
| Fbxo42 | 10.2335     | 0.26 | 2.5%   |
| Fbxo43 | 0.007313984 | 0.01 | 100.0% |
| Fbxo44 | 34.9633     | 1.35 | 3.9%   |
| Fbxo45 | 11.57876    | 0.48 | 4.1%   |
| Fbxo46 | 2.600574    | 0.11 | 4.1%   |
| Fbxo47 | 0.6978392   | 0.14 | 20.2%  |
| Fbxo5  | 1.519458    | 0.21 | 14.0%  |
| Fbxo6  | 7.670748    | 0.30 | 4.0%   |
| Fbxo7  | 6.56008     | 0.36 | 5.6%   |
| Fbxo8  | 3.979796    | 0.38 | 9.5%   |
| Fbxo9  | 26.74048    | 3.73 | 13.9%  |
| Fbxw10 | 0.0745052   | 0.10 | 140.2% |
| Fbxw11 | 43.96308    | 0.84 | 1.9%   |
| Fbxw12 | 0           | 0.00 |        |
| Fbxw13 | 0           | 0.00 |        |
| Fbxw14 | 0           | 0.00 |        |
| Fbxw15 | 0.00449176  | 0.01 | 223.6% |
| Fbxw16 | 0           | 0.00 |        |
| Fbxw17 | 2.143468    | 0.08 | 3.7%   |
| Fbxw19 | 0           | 0.00 |        |
| Fbxw2  | 29.16616    | 2.43 | 8.3%   |
| Fbxw4  | 11.10612    | 0.86 | 7.8%   |
| Fbxw5  | 27.47994    | 1.25 | 4.6%   |
| Fbxw6  | 6.08524     | 0.48 | 7.8%   |

|        |            |      |        |
|--------|------------|------|--------|
| Fbxw7  | 13.33314   | 0.45 | 3.4%   |
| Fbxw8  | 9.143674   | 0.42 | 4.6%   |
| Fbxw9  | 14.13488   | 1.58 | 11.1%  |
| Fcamr  | 0.0220162  | 0.01 | 65.2%  |
| Fcer1a | 0          | 0.00 |        |
| Fcer1g | 0          | 0.00 |        |
| Fcer2a | 0.327917   | 0.04 | 12.3%  |
| Fcf1   | 1.0034228  | 0.22 | 22.0%  |
| Fcgbp  | 0.09594638 | 0.05 | 54.5%  |
| Fcgr1  | 0.0574246  | 0.03 | 45.7%  |
| Fcgr2b | 0.01270798 | 0.02 | 159.0% |
| Fcgr3  | 0.0593855  | 0.07 | 109.5% |
| Fcgr4  | 0          | 0.00 |        |
| Fcgrt  | 1.3159936  | 0.28 | 21.4%  |
| Fcho1  | 22.3065    | 1.19 | 5.3%   |
| Fcho2  | 4.642192   | 0.50 | 10.7%  |
| Fchsd1 | 3.885514   | 0.16 | 4.2%   |
| Fchsd2 | 18.575     | 0.61 | 3.3%   |
| Fcmd   | 10.29182   | 0.37 | 3.5%   |
| Fcna   | 0.0061111  | 0.01 | 223.6% |
| Fcnb   | 0.01666018 | 0.02 | 94.0%  |
| Fcrl1  | 0          | 0.00 |        |
| Fcrl5  | 0          | 0.00 |        |
| Fcrl6  | 0.00759384 | 0.02 | 223.6% |
| Fcrla  | 0          | 0.00 |        |
| Fcrlb  | 0.09293576 | 0.05 | 57.0%  |
| Fdft1  | 53.24392   | 7.69 | 14.5%  |
| Fdps   | 11.9845    | 2.40 | 20.0%  |
| Fdx1   | 5.0268     | 0.35 | 6.9%   |
| Fdxr   | 1.712892   | 0.19 | 11.3%  |
| Fech   | 12.47826   | 0.28 | 2.2%   |
| Fem1a  | 8.988054   | 0.53 | 5.9%   |
| Fem1b  | 52.17462   | 1.87 | 3.6%   |
| Fem1c  | 10.95806   | 0.71 | 6.4%   |
| Fen1   | 5.98333    | 0.46 | 7.6%   |
| Fer1l3 | 0.3357344  | 0.06 | 19.2%  |
| Ferd3l | 0.02600984 | 0.02 | 60.2%  |
| Fert2  | 6.48974    | 0.80 | 12.3%  |
| Fes    | 0.07140766 | 0.04 | 59.9%  |
| Fetub  | 0.00296854 | 0.01 | 223.6% |
| Fev    | 0.15196466 | 0.08 | 55.0%  |
| Fez1   | 84.15584   | 2.66 | 3.2%   |
| Fez2   | 15.03854   | 0.72 | 4.8%   |
| Fezf1  | 0.00633034 | 0.01 | 138.0% |
| Fezf2  | 0.03855508 | 0.03 | 79.8%  |
| Ffar1  | 0          | 0.00 |        |
| Ffar2  | 0.00888982 | 0.01 | 137.7% |

|          |             |      |        |
|----------|-------------|------|--------|
| Ffar3    | 0.00471148  | 0.01 | 223.6% |
| Fga      | 0           | 0.00 |        |
| Fgb      | 0           | 0.00 |        |
| Fgd1     | 8.537072    | 0.49 | 5.7%   |
| Fgd2     | 0.009970712 | 0.01 | 118.9% |
| Fgd3     | 0.14074402  | 0.05 | 35.6%  |
| Fgd4     | 3.828816    | 0.46 | 12.0%  |
| Fgd5     | 4.76469     | 0.62 | 12.9%  |
| Fgd6     | 0.6783324   | 0.06 | 8.3%   |
| Fgf1     | 5.241652    | 1.03 | 19.7%  |
| Fgf10    | 1.275968    | 0.20 | 15.9%  |
| Fgf11    | 9.774814    | 1.23 | 12.5%  |
| Fgf12    | 75.90488    | 2.09 | 2.8%   |
| Fgf13    | 64.52772    | 4.61 | 7.1%   |
| Fgf14    | 5.2873      | 0.32 | 6.0%   |
| Fgf15    | 1.340124    | 0.27 | 20.5%  |
| Fgf16    | 0.06309304  | 0.03 | 42.5%  |
| Fgf17    | 0.14312472  | 0.06 | 41.8%  |
| Fgf18    | 2.46671     | 0.18 | 7.5%   |
| Fgf2     | 0.27270294  | 0.18 | 65.1%  |
| Fgf20    | 0.00720368  | 0.02 | 223.6% |
| Fgf21    | 0.0343476   | 0.03 | 101.5% |
| Fgf22    | 1.56372     | 0.17 | 10.9%  |
| Fgf23    | 0.25308     | 0.07 | 28.9%  |
| Fgf3     | 1.4074      | 0.17 | 12.4%  |
| Fgf4     | 0           | 0.00 |        |
| Fgf5     | 0.459936    | 0.07 | 15.3%  |
| Fgf6     | 0           | 0.00 |        |
| Fgf7     | 0.5336244   | 0.12 | 22.9%  |
| Fgf8     | 0.04018386  | 0.04 | 107.3% |
| Fgf9     | 12.21292    | 1.01 | 8.3%   |
| Fgfbp1   | 0.01189624  | 0.01 | 91.9%  |
| Fgfbp3   | 0.7687976   | 0.20 | 25.9%  |
| Fgfr1    | 19.06654    | 1.07 | 5.6%   |
| Fgfr1op  | 8.969908    | 0.28 | 3.1%   |
| Fgfr1op2 | 12.24346    | 0.89 | 7.2%   |
| Fgfr2    | 3.28517     | 0.22 | 6.8%   |
| Fgfr3    | 1.1044572   | 0.21 | 19.4%  |
| Fgfr4    | 0.1212275   | 0.05 | 39.3%  |
| Fgfr11   | 4.388716    | 0.53 | 12.2%  |
| Fgg      | 0.01221256  | 0.01 | 93.8%  |
| Fgl1     | 0.00604104  | 0.01 | 223.6% |
| Fgl2     | 0.5055834   | 0.04 | 8.4%   |
| Fgr      | 0.01305534  | 0.01 | 59.4%  |
| Fh1      | 58.17256    | 2.53 | 4.3%   |
| Fhad1    | 0.137809    | 0.03 | 23.4%  |
| Fhit     | 2.650626    | 0.40 | 15.0%  |

|           |            |      |        |
|-----------|------------|------|--------|
| Fhl1      | 73.64128   | 2.33 | 3.2%   |
| Fhl2      | 4.983896   | 0.47 | 9.5%   |
| Fhl3      | 0.328305   | 0.07 | 21.1%  |
| Fhl4      | 0.320155   | 0.05 | 16.3%  |
| Fhl5      | 0.02673622 | 0.03 | 102.6% |
| Fhod1     | 1.399276   | 0.10 | 6.9%   |
| Fhod3     | 11.63278   | 0.89 | 7.6%   |
| FHOS2     | 0.03592546 | 0.01 | 25.9%  |
| fi58gm    | 11.59318   | 1.09 | 9.4%   |
| Fibcd1    | 3.260214   | 0.32 | 9.7%   |
| Fibp      | 25.51384   | 0.62 | 2.4%   |
| Fig4      | 12.45722   | 0.68 | 5.4%   |
| Figf      | 0.4141098  | 0.12 | 29.7%  |
| Figla     | 0.00666858 | 0.01 | 223.6% |
| Fign      | 0.5362922  | 0.05 | 9.5%   |
| Fignl1    | 0.5137316  | 0.08 | 15.9%  |
| Filip1    | 0.04170878 | 0.01 | 27.6%  |
| Fip1l1    | 20.8618    | 0.61 | 2.9%   |
| Fis1      | 47.11522   | 3.57 | 7.6%   |
| Fiz1      | 6.488324   | 0.27 | 4.1%   |
| Fjx1      | 8.950094   | 0.99 | 11.1%  |
| Fkbp10    | 3.470354   | 0.72 | 20.8%  |
| Fkbp11    | 3.031012   | 0.35 | 11.5%  |
| FKBP12-T1 | 4.666434   | 1.13 | 24.3%  |
| Fkbp14    | 5.82469    | 0.54 | 9.2%   |
| Fkbp15    | 0.11888554 | 0.05 | 37.9%  |
| Fkbp1a    | 92.87622   | 5.32 | 5.7%   |
| Fkbp1b    | 31.23262   | 2.80 | 9.0%   |
| FKBP1b-B  | 0.945939   | 0.43 | 45.8%  |
| Fkbp2     | 70.04778   | 4.27 | 6.1%   |
| FKBP23    | 0.2476286  | 0.16 | 66.2%  |
| Fkbp3     | 93.68238   | 3.82 | 4.1%   |
| Fkbp4     | 63.84206   | 3.83 | 6.0%   |
| Fkbp5     | 4.801752   | 0.59 | 12.3%  |
| Fkbp6     | 0          | 0.00 |        |
| Fkbp7     | 2.305702   | 0.25 | 11.0%  |
| Fkbp8     | 79.16632   | 3.98 | 5.0%   |
| Fkbp9     | 11.369258  | 1.26 | 11.0%  |
| FkbpI     | 2.963608   | 0.22 | 7.4%   |
| Fkhl18    | 0.2495008  | 0.07 | 29.0%  |
| Fkhr2     | 0.04892158 | 0.01 | 29.3%  |
| Fkrp      | 13.5498    | 0.76 | 5.6%   |
| Flad1     | 6.51724    | 0.20 | 3.1%   |
| Flame-3   | 1.359624   | 0.42 | 30.8%  |
| Flcn      | 12.73248   | 0.37 | 2.9%   |
| Flg       | 0          | 0.00 |        |
| Flg2      | 0          | 0.00 |        |



|         |            |      |        |
|---------|------------|------|--------|
| Fli1    | 0.13208588 | 0.06 | 44.7%  |
| Flii    | 9.392226   | 0.64 | 6.9%   |
| Flna    | 17.36002   | 1.29 | 7.5%   |
| Flnb    | 3.870786   | 0.57 | 14.8%  |
| Flnc    | 1.40416    | 0.18 | 13.1%  |
| Flot1   | 56.86772   | 2.68 | 4.7%   |
| Flot2   | 45.64536   | 1.80 | 3.9%   |
| FLRG    | 0.17420376 | 0.05 | 29.0%  |
| Flrt1   | 1.894628   | 0.26 | 13.9%  |
| Flrt2   | 4.789986   | 0.39 | 8.2%   |
| Flrt3   | 11.42404   | 0.81 | 7.1%   |
| Flt1    | 0.6947968  | 0.20 | 29.3%  |
| Flt3    | 3.014596   | 0.41 | 13.6%  |
| Flt3l   | 0.498861   | 0.04 | 8.0%   |
| Flt4    | 0.1949772  | 0.03 | 14.8%  |
| Flvcr1  | 6.320982   | 1.11 | 17.6%  |
| Flvcr2  | 0.12293372 | 0.03 | 21.6%  |
| Flywch1 | 64.32094   | 5.36 | 8.3%   |
| Flywch2 | 16.5885    | 2.70 | 16.3%  |
| Fmn1    | 0.3051164  | 0.11 | 35.9%  |
| Fmn2    | 9.570806   | 0.35 | 3.7%   |
| Fmnl1   | 6.010128   | 0.27 | 4.4%   |
| Fmnl2   | 7.346212   | 0.36 | 4.9%   |
| Fmnl3   | 1.376458   | 0.08 | 5.6%   |
| Fmo1    | 0.8215154  | 0.45 | 55.0%  |
| Fmo2    | 0.1312135  | 0.08 | 63.5%  |
| Fmo3    | 0          | 0.00 |        |
| Fmo4    | 0          | 0.00 |        |
| Fmo5    | 0.07575506 | 0.03 | 35.4%  |
| Fmo9    | 0.00294876 | 0.01 | 223.6% |
| Fmod    | 0.261338   | 0.06 | 22.9%  |
| Fmr1    | 16.25836   | 0.94 | 5.8%   |
| Fmr1nb  | 0.08467838 | 0.06 | 76.3%  |
| fmr2    | 0.01852394 | 0.00 | 25.1%  |
| Fn1     | 7.571182   | 1.87 | 24.7%  |
| Fn3k    | 13.240392  | 2.33 | 17.6%  |
| Fn5     | 0.8985876  | 0.59 | 66.1%  |
| Fnbp1   | 41.2052    | 2.00 | 4.9%   |
| Fnbp1l  | 20.94804   | 2.94 | 14.0%  |
| Fnbp4   | 9.785422   | 0.41 | 4.2%   |
| Fndc1   | 0          | 0.00 |        |
| Fndc3a  | 16.73602   | 0.71 | 4.3%   |
| Fndc3b  | 5.349582   | 0.41 | 7.6%   |
| Fndc4   | 27.9648    | 2.10 | 7.5%   |
| Fndc5   | 16.8173    | 1.34 | 8.0%   |
| Fndc7   | 0.00396425 | 0.01 | 140.8% |
| Fndc8   | 0.6777212  | 0.13 | 18.7%  |

|        |            |      |        |
|--------|------------|------|--------|
| Fnip1  | 8.006474   | 0.87 | 10.8%  |
| Fnta   | 35.14738   | 1.34 | 3.8%   |
| Fntb   | 7.95761    | 0.31 | 3.8%   |
| Fog-2  | 0.02843348 | 0.01 | 26.1%  |
| Folh1  | 0.436867   | 0.13 | 30.3%  |
| Folr1  | 0.04488774 | 0.07 | 163.6% |
| Folr2  | 0.02494778 | 0.02 | 84.3%  |
| Folr4  | 0.02482918 | 0.02 | 83.2%  |
| Fos    | 3.05726    | 0.70 | 23.0%  |
| Fosb   | 0.2878402  | 0.06 | 22.0%  |
| Fosl1  | 0.05542632 | 0.03 | 54.7%  |
| Fosl2  | 2.179088   | 0.17 | 7.7%   |
| Foxa1  | 0.1316416  | 0.03 | 21.9%  |
| Foxa2  | 0.6237616  | 0.23 | 36.6%  |
| Foxa3  | 0.00980818 | 0.01 | 139.0% |
| Foxb1  | 0.3827616  | 0.06 | 14.5%  |
| Foxb2  | 0.0246183  | 0.01 | 38.9%  |
| Foxc1  | 0.4619584  | 0.03 | 7.4%   |
| Foxc2  | 0.04815396 | 0.02 | 49.3%  |
| Foxd1  | 0.1995652  | 0.08 | 42.6%  |
| Foxd2  | 0.11164474 | 0.04 | 36.2%  |
| Foxd3  | 1.33637    | 0.24 | 18.1%  |
| Foxd4  | 0          | 0.00 |        |
| Foxe1  | 0.2121362  | 0.06 | 27.6%  |
| Foxe3  | 0.0093062  | 0.02 | 223.6% |
| Foxf1a | 0.4422028  | 0.12 | 27.4%  |
| Foxf2  | 0.310305   | 0.09 | 27.9%  |
| Foxg1  | 0.11075094 | 0.02 | 21.7%  |
| Foxh1  | 0.02893936 | 0.01 | 50.7%  |
| Foxi1  | 0          | 0.00 |        |
| Foxi2  | 0.00563284 | 0.01 | 138.7% |
| Foxj1  | 2.879712   | 0.74 | 25.9%  |
| Foxj2  | 5.449428   | 0.24 | 4.4%   |
| Foxj3  | 18.07072   | 0.71 | 3.9%   |
| Foxk1  | 4.570586   | 0.18 | 3.9%   |
| Foxk2  | 22.6778    | 2.34 | 10.3%  |
| Foxl1  | 0.00484094 | 0.01 | 139.7% |
| Foxl2  | 1.1356926  | 0.30 | 26.7%  |
| Foxm1  | 1.2396858  | 0.21 | 16.9%  |
| Foxn1  | 0          | 0.00 |        |
| Foxn2  | 1.0579618  | 0.15 | 14.2%  |
| Foxn3  | 23.92762   | 6.56 | 27.4%  |
| Foxn4  | 0          | 0.00 |        |
| Foxo1  | 0.835595   | 0.05 | 6.6%   |
| Foxo3a | 10.198706  | 1.24 | 12.2%  |
| Foxo4  | 3.018138   | 0.61 | 20.3%  |
| Foxo6  | 0.9499664  | 0.14 | 15.1%  |

|         |             |       |        |
|---------|-------------|-------|--------|
| Foxp1   | 3.53172     | 0.24  | 6.9%   |
| Foxp1a  | 0.03521732  | 0.01  | 41.3%  |
| Foxp2   | 3.300938    | 0.31  | 9.3%   |
| Foxp3   | 0.37046316  | 0.52  | 139.4% |
| Foxp4   | 1.1506808   | 0.23  | 20.0%  |
| Foxq1   | 0.3818242   | 0.05  | 14.1%  |
| Foxr1   | 0.0035359   | 0.01  | 223.6% |
| Foxred1 | 13.1387     | 0.78  | 6.0%   |
| Foxred2 | 10.514058   | 0.73  | 6.9%   |
| Fpgs    | 1.923426    | 0.11  | 5.7%   |
| Fpgt    | 6.178598    | 0.28  | 4.5%   |
| Fpr1    | 0.02880586  | 0.03  | 103.9% |
| Fprl1   | 0           | 0.00  |        |
| Fpr-rs2 | 0.04356496  | 0.04  | 96.1%  |
| Fpr-rs6 | 0           | 0.00  |        |
| Fr1     | 0.3374722   | 0.22  | 64.4%  |
| Frag1   | 7.147384    | 0.67  | 9.4%   |
| Frap1   | 16.06924    | 0.60  | 3.7%   |
| Fras1   | 1.11608     | 0.09  | 7.8%   |
| Frat1   | 3.885286    | 0.31  | 7.9%   |
| Frat2   | 1.738078    | 0.20  | 11.4%  |
| Frem1   | 0.3622832   | 0.02  | 6.5%   |
| Frem2   | 0.13190212  | 0.06  | 42.6%  |
| Freq    | 74.82578    | 2.06  | 2.8%   |
| Frg1    | 12.50462    | 0.50  | 4.0%   |
| Frk     | 0.2562058   | 0.04  | 16.8%  |
| Frmd3   | 5.221062    | 0.54  | 10.3%  |
| Frmd4a  | 13.35364    | 1.45  | 10.9%  |
| Frmd4b  | 1.761442    | 0.25  | 14.0%  |
| Frmd5   | 11.13712    | 0.77  | 6.9%   |
| Frmd6   | 1.353562    | 0.13  | 9.9%   |
| Frmpd1  | 1.839098    | 0.11  | 5.8%   |
| Frmpd3  | 3.759016    | 0.58  | 15.5%  |
| Frmpd4  | 4.079106    | 0.61  | 15.0%  |
| Frs1    | 0.3145468   | 0.10  | 31.3%  |
| Frs2    | 7.533568    | 0.50  | 6.6%   |
| Frs3    | 13.54136    | 1.16  | 8.6%   |
| Fry     | 12.3978     | 1.08  | 8.7%   |
| Fryl    | 4.999422    | 0.24  | 4.9%   |
| Frzb    | 1.315432    | 0.15  | 11.1%  |
| Fsbp    | 0.1518128   | 0.04  | 23.8%  |
| Fscn1   | 131.3712    | 14.92 | 11.4%  |
| Fscn2   | 0.1544116   | 0.08  | 53.9%  |
| Fscn3   | 0.02327026  | 0.02  | 64.6%  |
| Fsd1    | 31.26636    | 1.51  | 4.8%   |
| Fsd1l   | 2.467912    | 0.31  | 12.4%  |
| Fsd2    | 0.008803034 | 0.01  | 59.9%  |

|        |            |       |        |
|--------|------------|-------|--------|
| Fshb   | 0          | 0.00  |        |
| Fshr   | 0          | 0.00  |        |
| Fsip1  | 0.1918562  | 0.04  | 21.6%  |
| Fsrg3  | 2.621868   | 0.19  | 7.1%   |
| Fst    | 1.0403152  | 0.23  | 21.8%  |
| Fstl1  | 39.04274   | 4.99  | 12.8%  |
| Fstl3  | 0.10304996 | 0.03  | 31.1%  |
| Fstl4  | 2.857626   | 0.11  | 3.8%   |
| Fstl5  | 26.76062   | 1.33  | 5.0%   |
| Ftcd   | 0.00553244 | 0.01  | 223.6% |
| Fth1   | 434.6834   | 13.46 | 3.1%   |
| Fthl17 | 0          | 0.00  |        |
| Ftl1   | 7.353584   | 0.52  | 7.0%   |
| Ftl2   | 24.31184   | 3.49  | 14.3%  |
| Ftmt   | 0          | 0.00  |        |
| Fto    | 64.49394   | 1.14  | 1.8%   |
| Ftsj1  | 5.416612   | 0.54  | 10.0%  |
| Ftsj2  | 3.16647    | 0.24  | 7.7%   |
| Ftsj3  | 8.716836   | 0.34  | 4.0%   |
| Fubp1  | 25.145     | 1.40  | 5.6%   |
| Fubp3  | 7.34733    | 0.12  | 1.6%   |
| Fuca1  | 12.63276   | 1.30  | 10.3%  |
| Fuca2  | 19.23724   | 1.07  | 5.6%   |
| Fuk    | 1.1053426  | 0.19  | 16.7%  |
| FuK    | 0.6760458  | 0.10  | 14.1%  |
| Fundc1 | 22.13362   | 1.86  | 8.4%   |
| Fundc2 | 28.1599    | 1.42  | 5.0%   |
| Furin  | 6.19809    | 0.41  | 6.7%   |
| Fus    | 53.62798   | 1.34  | 2.5%   |
| Fusip1 | 9.234562   | 1.40  | 15.2%  |
| Fut1   | 0.03701214 | 0.05  | 122.2% |
| Fut10  | 0.4416098  | 0.06  | 14.6%  |
| Fut11  | 4.817704   | 0.29  | 6.0%   |
| Fut2   | 0.05511126 | 0.02  | 28.3%  |
| Fut4   | 0.09006994 | 0.02  | 27.2%  |
| Fut7   | 0.903695   | 0.11  | 11.9%  |
| Fut8   | 15.81024   | 1.06  | 6.7%   |
| Fut9   | 13.08522   | 1.04  | 7.9%   |
| Fuz    | 2.926694   | 0.17  | 5.9%   |
| Fv1    | 2.005224   | 0.37  | 18.6%  |
| Fvt1   | 5.538656   | 0.47  | 8.4%   |
| Fxc1   | 9.978752   | 1.31  | 13.1%  |
| Fxn    | 2.239036   | 0.20  | 9.1%   |
| Fxr1   | 5.952188   | 0.40  | 6.7%   |
| Fxr1h  | 27.9373    | 1.57  | 5.6%   |
| Fxr2   | 26.13348   | 0.60  | 2.3%   |
| Fxy    | 5.500482   | 4.10  | 74.5%  |

|               |            |       |        |
|---------------|------------|-------|--------|
| Fxyd1         | 0.6041596  | 0.19  | 30.8%  |
| Fxyd2         | 0.8882618  | 0.34  | 38.3%  |
| Fxyd3         | 1.670664   | 0.40  | 23.9%  |
| Fxyd4         | 0.02199702 | 0.02  | 91.9%  |
| Fxyd5         | 0.519056   | 0.18  | 34.8%  |
| Fxyd6         | 70.12866   | 10.08 | 14.4%  |
| Fxyd7         | 68.65306   | 10.35 | 15.1%  |
| Fyb           | 1.0698666  | 0.61  | 57.3%  |
| Fyco1         | 2.128974   | 0.31  | 14.4%  |
| Fyn           | 65.03364   | 4.86  | 7.5%   |
| Fyttd1        | 31.38138   | 0.80  | 2.6%   |
| Fzd1          | 5.055748   | 0.42  | 8.4%   |
| Fzd10         | 2.539886   | 0.43  | 16.8%  |
| Fzd3          | 5.17922    | 0.58  | 11.1%  |
| Fzd4          | 1.295582   | 0.16  | 12.0%  |
| Fzd5          | 0.4748444  | 0.04  | 8.1%   |
| Fzd6          | 0.2981372  | 0.08  | 25.2%  |
| Fzd7          | 1.483862   | 0.30  | 20.4%  |
| Fzd8          | 2.610014   | 0.10  | 3.8%   |
| Fzd9          | 1.712992   | 0.11  | 6.2%   |
| Fzr1          | 33.16946   | 2.57  | 7.8%   |
| G0s2          | 1.775932   | 0.61  | 34.6%  |
| G2ad          | 1.8252932  | 0.96  | 52.4%  |
| G3BP          | 0.12482298 | 0.03  | 24.1%  |
| G3bp1         | 19.52826   | 1.33  | 6.8%   |
| G3bp2         | 75.9277    | 1.81  | 2.4%   |
| G430022H21Rik | 5.388592   | 0.28  | 5.1%   |
| G5pr          | 0.4453482  | 0.10  | 23.2%  |
| G630014P10Rik | 3.714      | 0.16  | 4.2%   |
| G630016D24Rik | 0.08713394 | 0.06  | 70.7%  |
| G630039H03Rik | 0.755701   | 0.11  | 15.1%  |
| G6pc          | 0          | 0.00  |        |
| G6pc2         | 0.01978676 | 0.02  | 119.0% |
| G6pc3         | 36.12208   | 1.13  | 3.1%   |
| G6pd2         | 3.018874   | 0.14  | 4.6%   |
| G6pdx         | 7.946242   | 0.38  | 4.8%   |
| G9a           | 2.573852   | 0.33  | 12.8%  |
| Gaa           | 93.81834   | 3.21  | 3.4%   |
| Gab1          | 3.085614   | 0.36  | 11.7%  |
| Gab2          | 6.915042   | 0.51  | 7.4%   |
| Gab3          | 0.950887   | 0.09  | 9.7%   |
| GABA-B-R      | 0.4848576  | 0.18  | 37.5%  |
| Gabarap       | 105.69172  | 9.71  | 9.2%   |
| Gabarapl1     | 243.666    | 5.48  | 2.2%   |
| Gabarapl2     | 13.32014   | 0.92  | 6.9%   |
| Gabbr1        | 169.7202   | 6.64  | 3.9%   |
| Gabbr2        | 26.20778   | 0.39  | 1.5%   |

|            |            |      |        |
|------------|------------|------|--------|
| Gabpa      | 8.5826     | 1.10 | 12.8%  |
| Gabpb1     | 8.571086   | 1.13 | 13.2%  |
| Gabpb2     | 4.119154   | 0.53 | 12.8%  |
| Gabra1     | 9.01074    | 0.80 | 8.9%   |
| Gabra2     | 28.22418   | 1.85 | 6.6%   |
| Gabra3     | 26.0508    | 0.83 | 3.2%   |
| Gabra4     | 5.83007    | 0.17 | 2.9%   |
| Gabra5     | 28.9894    | 3.17 | 10.9%  |
| Gabra6     | 0          | 0.00 |        |
| Gabrb1     | 3.906874   | 0.48 | 12.3%  |
| Gabrb2     | 13.46166   | 1.18 | 8.8%   |
| Gabrb3     | 56.24872   | 2.58 | 4.6%   |
| Gabrd      | 0.21333736 | 0.08 | 38.4%  |
| Gabre      | 1.0810398  | 0.24 | 22.4%  |
| Gabrg1     | 3.84602    | 0.26 | 6.9%   |
| Gabrg2     | 5.16443    | 0.24 | 4.7%   |
| Gabrg3     | 6.216938   | 0.67 | 10.8%  |
| Gabrp      | 0.00442304 | 0.01 | 137.7% |
| Gabrq      | 3.408924   | 0.29 | 8.5%   |
| Gabrr1     | 0.00224802 | 0.01 | 223.6% |
| Gabrr2     | 0.04062042 | 0.02 | 40.6%  |
| Gabrr3     | 0          | 0.00 |        |
| Gad1       | 10.03442   | 1.02 | 3.4%   |
| Gad2       | 13.8832    | 0.51 | 2.1%   |
| Gadd45a    | 4.590574   | 0.34 | 7.4%   |
| Gadd45b    | 1.485746   | 0.26 | 17.4%  |
| Gadd45g    | 4.75608    | 0.45 | 9.5%   |
| Gadd45gip1 | 8.006658   | 1.34 | 16.7%  |
| Gadl1      | 5.53716    | 0.42 | 7.6%   |
| Gak        | 26.53206   | 0.71 | 2.7%   |
| Gal        | 0.186828   | 0.14 | 76.3%  |
| Gal3st1    | 3.281578   | 0.36 | 10.9%  |
| Gal3st2    | 0          | 0.00 |        |
| Gal3st3    | 11.259     | 0.31 | 2.8%   |
| Gal3st4    | 1.0932684  | 0.19 | 17.0%  |
| Galc       | 4.847698   | 0.44 | 9.1%   |
| Gale       | 9.746038   | 0.60 | 6.1%   |
| Galk1      | 3.472008   | 0.77 | 22.1%  |
| Galk2      | 10.094926  | 0.86 | 8.5%   |
| Galm       | 0.8642788  | 0.18 | 20.5%  |
| Galnact2   | 3.353404   | 0.28 | 8.4%   |
| Galns      | 3.90878    | 0.42 | 10.8%  |
| Galnt1     | 14.86006   | 0.70 | 4.7%   |
| Galnt10    | 2.523986   | 0.17 | 6.8%   |
| Galnt11    | 23.311     | 1.39 | 6.0%   |
| Galnt12    | 0.212529   | 0.06 | 26.5%  |
| Galnt13    | 16.3242    | 0.85 | 5.2%   |

|         |            |       |        |
|---------|------------|-------|--------|
| Galnt14 | 9.251702   | 0.30  | 3.3%   |
| Galnt2  | 22.56834   | 1.58  | 7.0%   |
| Galnt3  | 0.13954124 | 0.07  | 50.4%  |
| Galnt4  | 0.6742018  | 0.12  | 17.1%  |
| Galnt5  | 0          | 0.00  |        |
| Galnt6  | 0.15812254 | 0.09  | 59.3%  |
| Galnt7  | 4.72448    | 0.29  | 6.2%   |
| Galnt9  | 9.468436   | 0.38  | 4.0%   |
| Galntl1 | 32.2283    | 0.68  | 2.1%   |
| Galntl2 | 0.0053373  | 0.01  | 223.6% |
| Galntl4 | 4.323084   | 0.40  | 9.3%   |
| Galntl5 | 0          | 0.00  |        |
| Galp    | 0          | 0.00  |        |
| Galr1   | 0.5353272  | 0.16  | 30.6%  |
| Galr2   | 0.4362224  | 0.10  | 23.6%  |
| Galr3   | 2.3909507  | 5.21  | 217.9% |
| Galt    | 7.62355    | 0.52  | 6.9%   |
| Gamt    | 2.180472   | 0.37  | 16.8%  |
| Gan     | 0.8398926  | 0.19  | 22.9%  |
| Ganab   | 62.07152   | 1.21  | 2.0%   |
| Ganc    | 1.977514   | 0.48  | 24.3%  |
| gap1m   | 0.2064228  | 0.08  | 37.6%  |
| Gap43   | 299.2398   | 29.71 | 9.9%   |
| Gapdh   | 0.475571   | 0.06  | 12.8%  |
| Gapdhs  | 0.67850104 | 1.43  | 210.9% |
| Gapvd1  | 18.56324   | 0.72  | 3.9%   |
| Garnl1  | 21.6351    | 1.05  | 4.9%   |
| Garnl3  | 15.91916   | 1.40  | 8.8%   |
| Garnl4  | 10.094832  | 0.98  | 9.7%   |
| Gars    | 77.15952   | 4.79  | 6.2%   |
| Gart    | 12.41118   | 0.79  | 6.3%   |
| Gas1    | 3.496686   | 0.76  | 21.8%  |
| Gas2    | 2.083158   | 0.25  | 12.1%  |
| Gas2l1  | 9.407812   | 0.59  | 6.3%   |
| Gas2l3  | 0.5531388  | 0.12  | 21.1%  |
| Gas5    | 40.51308   | 1.12  | 2.8%   |
| Gas6    | 35.3592    | 1.95  | 5.5%   |
| Gas7    | 8.398166   | 0.59  | 7.0%   |
| Gas8    | 8.604858   | 0.95  | 11.0%  |
| Gast    | 0.05295208 | 0.06  | 106.7% |
| Gata1   | 0          | 0.00  |        |
| Gata2   | 0.276714   | 0.05  | 19.1%  |
| Gata3   | 0.1969484  | 0.07  | 34.0%  |
| Gata4   | 1.479318   | 0.39  | 26.6%  |
| Gata5   | 0.04031812 | 0.02  | 39.7%  |
| Gata6   | 0.5956948  | 0.28  | 47.2%  |
| Gatad1  | 22.759     | 1.56  | 6.8%   |

|         |             |      |        |
|---------|-------------|------|--------|
| Gatad2a | 8.420778    | 0.22 | 2.7%   |
| Gatad2b | 11.150096   | 1.02 | 9.2%   |
| Gatm    | 4.98988     | 0.53 | 10.6%  |
| Gats    | 17.7647     | 2.18 | 12.3%  |
| Gba     | 11.92032    | 0.42 | 3.5%   |
| Gba2    | 22.4109     | 1.27 | 5.7%   |
| Gbas    | 28.82762    | 1.05 | 3.6%   |
| Gbe1    | 6.661472    | 0.54 | 8.2%   |
| Gbf1    | 35.85954    | 1.63 | 4.5%   |
| Gbgt1   | 0.02995258  | 0.02 | 63.2%  |
| Gbl     | 6.504472    | 0.37 | 5.7%   |
| Gbp1    | 0.040396124 | 0.03 | 75.2%  |
| Gbp2    | 0.09777392  | 0.03 | 33.8%  |
| Gbp3    | 0.2479804   | 0.05 | 21.3%  |
| Gbp4    | 0.026933318 | 0.01 | 41.3%  |
| Gbp5    | 0.03040478  | 0.02 | 59.6%  |
| Gbp6    | 0.3481972   | 0.05 | 12.9%  |
| Gbx1    | 0.13169388  | 0.03 | 25.5%  |
| Gbx2    | 4.034756    | 0.79 | 19.6%  |
| Gc      | 0.04077304  | 0.03 | 71.6%  |
| Gca     | 3.045298    | 0.15 | 4.9%   |
| Gcap14  | 24.81396    | 1.35 | 5.4%   |
| Gcat    | 3.7845452   | 1.99 | 52.5%  |
| Gcc1    | 3.504652    | 0.14 | 4.1%   |
| Gcc2    | 17.5832     | 0.80 | 4.6%   |
| Gcdh    | 7.100846    | 0.31 | 4.3%   |
| Gcet2   | 0.00231998  | 0.01 | 223.6% |
| Gcg     | 0           | 0.00 |        |
| Gcgr    | 0           | 0.00 |        |
| Gch1    | 0.4739992   | 0.10 | 21.9%  |
| Gchfr   | 0.2516752   | 0.11 | 45.4%  |
| Gck     | 0.0845152   | 0.04 | 43.1%  |
| Gckr    | 0.02398144  | 0.02 | 69.1%  |
| Gclc    | 14.46984    | 0.57 | 3.9%   |
| Gclm    | 12.90426    | 0.47 | 3.7%   |
| Gcm1    | 0           | 0.00 |        |
| Gcm2    | 0           | 0.00 |        |
| Gcn1l1  | 13.43698    | 0.33 | 2.5%   |
| Gcn5l2  | 23.8708     | 1.50 | 6.3%   |
| Gcnt1   | 0.3366714   | 0.06 | 17.4%  |
| Gcnt2   | 1.439504    | 1.30 | 90.5%  |
| Gcnt3   | 0.2246788   | 0.13 | 57.2%  |
| Gcnt7   | 0.01309074  | 0.02 | 120.9% |
| Gcs1    | 9.485652    | 0.36 | 3.8%   |
| Gcsh    | 13.9832     | 0.76 | 5.5%   |
| Gda     | 3.003396    | 0.33 | 11.1%  |
| Gdap1   | 51.75572    | 2.12 | 4.1%   |



|            |            |       |        |
|------------|------------|-------|--------|
| Gdap111    | 40.5648    | 4.00  | 9.9%   |
| Gdap2      | 8.448356   | 0.47  | 5.5%   |
| Gde5       | 7.003876   | 1.29  | 18.4%  |
| Gdf1       | 3.557334   | 1.40  | 39.3%  |
| Gdf10      | 1.462646   | 0.19  | 13.0%  |
| Gdf11      | 5.32109    | 0.40  | 7.6%   |
| Gdf15      | 0.03391404 | 0.03  | 83.7%  |
| Gdf2       | 0          | 0.00  |        |
| Gdf3       | 0          | 0.00  |        |
| Gdf5       | 0.01585462 | 0.01  | 60.1%  |
| Gdf6       | 0.2303206  | 0.04  | 17.3%  |
| Gdf7       | 0.224026   | 0.07  | 31.7%  |
| Gdf9       | 0.2752424  | 0.07  | 25.6%  |
| Gdi1       | 248.0038   | 7.57  | 3.1%   |
| Gdi2       | 79.0935    | 4.61  | 5.8%   |
| Gdnf       | 0.2153264  | 0.09  | 43.2%  |
| GNFR-alpha | 0.1364784  | 0.02  | 15.2%  |
| Gdpd1      | 31.9178    | 3.64  | 11.4%  |
| Gdpd2      | 1.032976   | 0.14  | 13.1%  |
| Gdpd3      | 0.2517484  | 0.08  | 33.2%  |
| Gdpd4      | 0.00478676 | 0.01  | 137.6% |
| Gdpd5      | 3.49822    | 0.19  | 5.4%   |
| Gem        | 0.3536542  | 0.12  | 33.0%  |
| Gemin4     | 5.360504   | 1.61  | 30.0%  |
| Gemin5     | 4.82942    | 0.25  | 5.2%   |
| Gemin6     | 1.44099    | 0.19  | 13.3%  |
| Gemin7     | 16.60822   | 0.94  | 5.6%   |
| Gemin8     | 0.754589   | 0.21  | 27.3%  |
| gene_154   | 0          | 0.00  |        |
| gene_17    | 0          | 0.00  |        |
| Gfap       | 78.63166   | 10.13 | 12.9%  |
| Gfer       | 7.520268   | 0.27  | 3.5%   |
| Gfi1       | 0.07226602 | 0.05  | 64.3%  |
| Gfi1b      | 0.00293706 | 0.01  | 223.6% |
| Gfm1       | 17.49754   | 0.42  | 2.4%   |
| Gfm2       | 8.024592   | 0.40  | 5.0%   |
| Gfod1      | 5.46621    | 0.28  | 5.2%   |
| Gfod2      | 11.18182   | 1.09  | 9.8%   |
| Gfpt1      | 26.60422   | 1.17  | 4.4%   |
| Gfpt2      | 1.376926   | 0.30  | 22.0%  |
| Gfra1      | 34.71168   | 1.79  | 5.1%   |
| Gfra2      | 14.21716   | 0.70  | 4.9%   |
| Gfra3      | 0          | 0.00  |        |
| Gfra4      | 6.006388   | 0.47  | 7.8%   |
| Gfral      | 0.01326234 | 0.01  | 92.6%  |
| GFRalpha2  | 0.4547944  | 0.06  | 13.8%  |
| Gga1       | 15.87692   | 0.79  | 5.0%   |

|        |            |      |        |
|--------|------------|------|--------|
| Gga2   | 8.436556   | 0.68 | 8.1%   |
| Gga3   | 12.8129    | 0.52 | 4.1%   |
| Ggcx   | 4.185456   | 0.07 | 1.8%   |
| Ggh    | 5.50319    | 0.55 | 9.9%   |
| Ggn    | 0.306816   | 0.09 | 30.0%  |
| Ggnbp1 | 0.4165282  | 0.19 | 45.3%  |
| Ggnbp2 | 29.58852   | 0.40 | 1.3%   |
| Ggps1  | 27.45316   | 0.52 | 1.9%   |
| Ggt1   | 0.252551   | 0.03 | 10.9%  |
| Ggt6   | 0          | 0.00 |        |
| Ggta1  | 3.366074   | 0.47 | 13.9%  |
| Ggtl3  | 27.02836   | 1.67 | 6.2%   |
| Ggtla1 | 0.13953088 | 0.07 | 48.0%  |
| Gh     | 0          | 0.00 |        |
| Ghdc   | 4.71372    | 0.40 | 8.4%   |
| Ghitm  | 163.3514   | 3.28 | 2.0%   |
| Ghr    | 7.52083    | 1.28 | 17.0%  |
| Ghrh   | 0.01550454 | 0.03 | 223.6% |
| Ghrhr  | 0          | 0.00 |        |
| Ghrl   | 0.15323896 | 0.09 | 58.5%  |
| Ghsr   | 0.6460762  | 0.15 | 23.9%  |
| Gif    | 0.00506028 | 0.01 | 223.6% |
| Gig18  | 15.979418  | 5.75 | 36.0%  |
| Gimap1 | 0.00751708 | 0.02 | 223.6% |
| Gimap3 | 0          | 0.00 |        |
| Gimap4 | 0          | 0.00 |        |
| Gimap5 | 0          | 0.00 |        |
| Gimap6 | 0.01474628 | 0.01 | 99.1%  |
| Gimap7 | 0.01126882 | 0.02 | 138.7% |
| Gimap8 | 0.04571716 | 0.02 | 47.7%  |
| Gimap9 | 0.03085864 | 0.03 | 98.2%  |
| Gins1  | 1.1074664  | 0.13 | 11.9%  |
| Gins2  | 1.439574   | 0.19 | 13.5%  |
| Gins3  | 0.8601972  | 0.11 | 12.4%  |
| Gins4  | 8.127518   | 0.52 | 6.4%   |
| Gip    | 0          | 0.00 |        |
| Gipc1  | 18.44262   | 1.67 | 9.1%   |
| Gipc2  | 0.07635074 | 0.04 | 48.3%  |
| Gipc3  | 0.07780066 | 0.04 | 54.3%  |
| Gipr   | 0.18140002 | 0.08 | 42.1%  |
| Git1   | 33.18836   | 1.71 | 5.2%   |
| Git2   | 6.037264   | 0.21 | 3.5%   |
| Giyd2  | 5.432574   | 0.39 | 7.1%   |
| Gja1   | 11.98724   | 0.88 | 7.3%   |
| Gja10  | 0.01499248 | 0.01 | 96.6%  |
| Gja12  | 0.7213248  | 0.13 | 18.0%  |
| Gja3   | 0.04247952 | 0.03 | 68.5%  |

|          |            |      |        |
|----------|------------|------|--------|
| Gja4     | 1.0305702  | 0.14 | 13.5%  |
| Gja5     | 0.04157338 | 0.03 | 74.3%  |
| Gja6     | 0.01542794 | 0.01 | 92.5%  |
| Gja7     | 1.92242    | 0.19 | 9.7%   |
| Gja8     | 0.05629246 | 0.04 | 65.1%  |
| Gja9     | 20.29452   | 2.42 | 11.9%  |
| Gjb1     | 0.04696454 | 0.03 | 59.2%  |
| Gjb2     | 0.09835264 | 0.02 | 19.9%  |
| Gjb3     | 0.06063952 | 0.02 | 27.2%  |
| Gjb4     | 0.00854692 | 0.01 | 141.7% |
| Gjb5     | 0.04817226 | 0.05 | 101.6% |
| Gjb6     | 0.16211074 | 0.05 | 31.6%  |
| Gjc1     | 0.3719434  | 0.13 | 33.9%  |
| Gje1     | 0.05643412 | 0.03 | 55.6%  |
| Gk2      | 0.0723252  | 0.05 | 65.3%  |
| Gk5      | 1.069749   | 0.14 | 13.0%  |
| Gkap1    | 6.048156   | 0.20 | 3.3%   |
| Gkn1     | 0.940883   | 0.35 | 37.6%  |
| Gkn2     | 3.073994   | 0.89 | 29.1%  |
| gl       | 0.15780138 | 0.04 | 24.5%  |
| Gla      | 5.814124   | 0.47 | 8.0%   |
| Glb1     | 12.59704   | 0.47 | 3.7%   |
| Glb1l    | 1.805812   | 0.15 | 8.2%   |
| Glb1l3   | 0.00426962 | 0.01 | 223.6% |
| Glcci1   | 4.36221    | 2.50 | 57.2%  |
| Glce     | 4.960248   | 0.32 | 6.4%   |
| Gldc     | 1.732948   | 0.09 | 4.9%   |
| Gldn     | 0.04189436 | 0.03 | 72.5%  |
| Gle1l    | 11.47666   | 0.62 | 5.4%   |
| Glepp1   | 0.0402088  | 0.01 | 15.9%  |
| Glg1     | 33.88738   | 2.90 | 8.5%   |
| Gli1     | 1.1740368  | 0.40 | 34.4%  |
| Gli2     | 1.2203872  | 0.32 | 26.1%  |
| Gli3     | 0.427153   | 0.05 | 12.5%  |
| Glipr1   | 0.8162362  | 0.27 | 32.9%  |
| Glipr1l1 | 0          | 0.00 |        |
| Glipr1l2 | 0          | 0.00 |        |
| Glipr2   | 3.743964   | 0.52 | 14.0%  |
| Glis1    | 0.3815612  | 0.11 | 28.4%  |
| Glis2    | 3.98923    | 0.34 | 8.4%   |
| Glis3    | 0.7132616  | 0.15 | 21.6%  |
| Glmn     | 4.518108   | 1.47 | 32.6%  |
| Glo1     | 32.63008   | 1.26 | 3.9%   |
| Glod4    | 26.34868   | 2.15 | 8.2%   |
| Glod5    | 0.5425574  | 0.14 | 25.8%  |
| glp      | 1.762262   | 0.54 | 30.4%  |
| Glp1     | 0.12969638 | 0.05 | 40.7%  |

|             |             |      |        |
|-------------|-------------|------|--------|
| Glp1r       | 1.936256    | 0.22 | 11.3%  |
| Glp2r       | 0.08461172  | 0.03 | 32.3%  |
| Glra1       | 12.848712   | 2.58 | 20.0%  |
| Glra2       | 8.761032    | 1.08 | 12.3%  |
| Glra3       | 5.173716    | 0.66 | 12.8%  |
| Glra4       | 0.00837082  | 0.01 | 140.3% |
| Glrb        | 108.062     | 3.47 | 3.2%   |
| Glrp1       | 0.0037756   | 0.01 | 223.6% |
| Glrx        | 33.67446    | 1.34 | 4.0%   |
| Glrx2       | 12.9789     | 0.71 | 5.5%   |
| Glrx3       | 9.667338    | 1.15 | 11.9%  |
| Glrx5       | 36.71134    | 3.12 | 8.5%   |
| Gls         | 51.04698    | 4.93 | 9.7%   |
| Gls2        | 2.6258      | 0.49 | 18.8%  |
| Glt1d1      | 7.688002    | 0.31 | 4.1%   |
| Glt25d1     | 13.8785     | 0.67 | 4.8%   |
| Glt25d2     | 0.6259238   | 0.04 | 5.9%   |
| Glt28d2     | 0.1167906   | 0.05 | 40.2%  |
| Glt6d1      | 0           | 0.00 |        |
| Glt8d1      | 13.249      | 0.51 | 3.9%   |
| Glt8d2      | 0.033987199 | 0.02 | 63.9%  |
| Glt8d3      | 4.348984    | 0.03 | 0.6%   |
| Glt8d4      | 0.8822926   | 0.23 | 25.8%  |
| Gltp        | 3.739802    | 0.27 | 7.2%   |
| Gltscr1     | 1.91535     | 0.16 | 8.1%   |
| Gltscr2     | 10.495514   | 1.04 | 9.9%   |
| Glud1       | 41.0643     | 1.46 | 3.6%   |
| Glul        | 55.55446    | 3.59 | 6.5%   |
| Gluld1      | 0           | 0.00 |        |
| GluR_alpha3 | 4.949412    | 0.61 | 12.4%  |
| GLUT4       | 0.09087702  | 0.01 | 9.1%   |
| GLUTX1      | 1.5261056   | 0.96 | 62.8%  |
| Glyat       | 0.03916006  | 0.04 | 106.4% |
| Glycam1     | 6.331066    | 0.88 | 13.9%  |
| Gm1006      | 0           | 0.00 |        |
| Gm1008      | 0.01490812  | 0.01 | 61.5%  |
| Gm1019      | 0           | 0.00 |        |
| Gm1040      | 5.778994    | 0.37 | 6.4%   |
| Gm106       | 0.2135966   | 0.08 | 35.9%  |
| Gm1060      | 1.36987     | 0.04 | 2.9%   |
| Gm1070      | 0.05580724  | 0.04 | 70.8%  |
| Gm1082      | 0.005560396 | 0.01 | 155.2% |
| Gm1123      | 0.00909952  | 0.01 | 137.3% |
| Gm114       | 6.37128     | 0.49 | 7.7%   |
| Gm1141      | 0.07778598  | 0.05 | 69.5%  |
| Gm1157      | 0.02157308  | 0.01 | 62.9%  |
| Gm128       | 0.00728712  | 0.01 | 137.9% |

|        |             |      |        |
|--------|-------------|------|--------|
| Gm129  | 3.542376    | 0.26 | 7.4%   |
| Gm1322 | 0.00369808  | 0.01 | 223.6% |
| Gm1337 | 0.012195258 | 0.01 | 77.5%  |
| Gm136  | 0.00358484  | 0.01 | 223.6% |
| Gm1381 | 0           | 0.00 |        |
| Gm1527 | 0           | 0.00 |        |
| Gm156  | 0           | 0.00 |        |
| Gm1564 | 0.2587912   | 0.03 | 10.0%  |
| Gm1568 | 2.472374    | 0.17 | 7.0%   |
| Gm1574 | 0.00938068  | 0.01 | 138.1% |
| Gm1587 | 0           | 0.00 |        |
| Gm1604 | 0           | 0.00 |        |
| Gm1631 | 0           | 0.00 |        |
| Gm166  | 0.598028    | 0.14 | 22.6%  |
| Gm1661 | 0.22388092  | 0.11 | 50.2%  |
| Gm1673 | 30.27252    | 2.44 | 8.1%   |
| Gm1679 | 0           | 0.00 |        |
| Gm1698 | 0           | 0.00 |        |
| Gm1961 | 0.00266916  | 0.01 | 223.6% |
| Gm1964 | 0.3206782   | 0.05 | 15.7%  |
| Gm1965 | 0           | 0.00 |        |
| Gm1966 | 0           | 0.00 |        |
| Gm1967 | 0.10253548  | 0.05 | 49.4%  |
| Gm1968 | 0.00518064  | 0.01 | 223.6% |
| Gm216  | 0.12358684  | 0.07 | 55.0%  |
| Gm237  | 11.7288     | 0.79 | 6.7%   |
| Gm239  | 0.010070376 | 0.01 | 63.8%  |
| Gm249  | 0.0175243   | 0.03 | 162.6% |
| Gm266  | 0.07140422  | 0.04 | 51.6%  |
| Gm273  | 0           | 0.00 |        |
| Gm2a   | 24.0632     | 2.00 | 8.3%   |
| Gm317  | 0           | 0.00 |        |
| Gm323  | 17.44698    | 0.49 | 2.8%   |
| Gm347  | 6.055234    | 0.14 | 2.3%   |
| Gm382  | 0           | 0.00 |        |
| Gm397  | 0           | 0.00 |        |
| Gm410  | 0.02333402  | 0.03 | 127.0% |
| Gm414  | 0.00249374  | 0.01 | 223.6% |
| Gm428  | 0           | 0.00 |        |
| Gm436  | 0           | 0.00 |        |
| Gm443  | 0.0279407   | 0.02 | 69.9%  |
| Gm444  | 1.380642    | 0.06 | 4.1%   |
| Gm467  | 0           | 0.00 |        |
| Gm484  | 0           | 0.00 |        |
| Gm50   | 19.18424    | 0.54 | 2.8%   |
| Gm52   | 1.305356    | 0.06 | 4.8%   |
| Gm525  | 0.01999776  | 0.03 | 137.0% |

|       |            |      |        |
|-------|------------|------|--------|
| Gm527 | 1.434182   | 0.15 | 10.5%  |
| Gm561 | 14.3846    | 1.51 | 10.5%  |
| Gm566 | 0.3431172  | 0.11 | 30.7%  |
| Gm568 | 0.00896234 | 0.02 | 223.6% |
| Gm572 | 0.00418954 | 0.01 | 223.6% |
| Gm587 | 0.00219654 | 0.00 | 223.6% |
| Gm595 | 0.01071258 | 0.02 | 156.7% |
| Gm597 | 0          | 0.00 |        |
| Gm603 | 0.5254912  | 0.06 | 11.8%  |
| Gm606 | 0.00587098 | 0.01 | 147.4% |
| Gm608 | 1.485472   | 0.14 | 9.3%   |
| Gm609 | 0          | 0.00 |        |
| Gm614 | 0          | 0.00 |        |
| Gm623 | 0          | 0.00 |        |
| Gm628 | 0.03116618 | 0.01 | 21.7%  |
| Gm632 | 18.527     | 0.84 | 4.6%   |
| Gm648 | 0.02098572 | 0.02 | 99.7%  |
| Gm672 | 19.46716   | 0.67 | 3.5%   |
| Gm687 | 0.1507252  | 0.07 | 45.1%  |
| Gm693 | 14.2006    | 1.59 | 11.2%  |
| Gm694 | 0.0390171  | 0.03 | 87.2%  |
| Gm71  | 9.446994   | 0.57 | 6.0%   |
| Gm711 | 0.05404854 | 0.01 | 24.9%  |
| Gm719 | 0.9478228  | 0.42 | 44.2%  |
| Gm732 | 0          | 0.00 |        |
| Gm749 | 0          | 0.00 |        |
| Gm75  | 0          | 0.00 |        |
| Gm757 | 0          | 0.00 |        |
| Gm766 | 0.08281544 | 0.04 | 52.0%  |
| Gm767 | 0          | 0.00 |        |
| Gm77  | 0          | 0.00 |        |
| Gm773 | 0          | 0.00 |        |
| Gm784 | 0.05939808 | 0.02 | 26.1%  |
| Gm806 | 0.00230616 | 0.01 | 223.6% |
| Gm813 | 0          | 0.00 |        |
| Gm815 | 0          | 0.00 |        |
| Gm826 | 0.00622356 | 0.01 | 223.6% |
| Gm829 | 0          | 0.00 |        |
| Gm833 | 0          | 0.00 |        |
| Gm839 | 0          | 0.00 |        |
| Gm846 | 0.14345496 | 0.06 | 43.1%  |
| Gm851 | 0          | 0.00 |        |
| Gm853 | 0          | 0.00 |        |
| Gm854 | 0.01192976 | 0.02 | 158.8% |
| Gm867 | 0.07044818 | 0.04 | 61.5%  |
| Gm879 | 4.548258   | 0.34 | 7.5%   |
| Gm884 | 0          | 0.00 |        |

|         |            |       |        |
|---------|------------|-------|--------|
| Gm885   | 0.33022362 | 0.70  | 213.0% |
| Gm889   | 0.03384512 | 0.03  | 103.1% |
| Gm9     | 0          | 0.00  |        |
| Gm904   | 0          | 0.00  |        |
| Gm906   | 0          | 0.00  |        |
| Gm920   | 0.00244974 | 0.01  | 223.6% |
| Gm93    | 0          | 0.00  |        |
| Gm94    | 0          | 0.00  |        |
| Gm941   | 0.6940748  | 0.19  | 27.6%  |
| Gm944   | 4.66305    | 0.14  | 2.9%   |
| Gm949   | 0          | 0.00  |        |
| Gm96    | 3.96536    | 0.28  | 7.1%   |
| Gm960   | 1.410102   | 0.15  | 11.0%  |
| Gm962   | 2.141016   | 0.15  | 6.9%   |
| Gm967   | 2.981146   | 0.33  | 11.0%  |
| Gm97    | 0          | 0.00  |        |
| Gm973   | 0.0649363  | 0.03  | 47.1%  |
| Gm98    | 0.4059902  | 0.07  | 16.7%  |
| Gm996   | 12.24424   | 1.14  | 9.3%   |
| Gmcl1   | 9.416384   | 0.56  | 6.0%   |
| Gmcl1l  | 0          | 0.00  |        |
| Gmds    | 7.490942   | 0.37  | 4.9%   |
| Gmeb1   | 3.787716   | 0.15  | 4.1%   |
| Gmeb2   | 3.257214   | 0.19  | 5.8%   |
| Gmfb    | 74.96572   | 1.87  | 2.5%   |
| Gmfg    | 0.00720234 | 0.02  | 223.6% |
| Gmip    | 2.815162   | 0.13  | 4.6%   |
| Gmnn    | 1.573194   | 0.12  | 7.4%   |
| Gmppa   | 13.26324   | 0.46  | 3.5%   |
| Gmppb   | 5.232734   | 0.57  | 10.8%  |
| Gmpr    | 12.78744   | 0.87  | 6.8%   |
| Gmpr2   | 7.904978   | 0.37  | 4.7%   |
| Gmps    | 20.51098   | 2.46  | 12.0%  |
| Gna11   | 24.06466   | 1.57  | 6.5%   |
| Gna12   | 9.191346   | 0.93  | 10.1%  |
| Gna13   | 8.063152   | 0.51  | 6.4%   |
| Gna14   | 0.2641544  | 0.04  | 16.7%  |
| Gna15   | 0.01922236 | 0.01  | 63.5%  |
| Gnai1   | 52.08852   | 1.12  | 2.2%   |
| Gnai2   | 39.02984   | 2.66  | 6.8%   |
| Gnai3   | 15.81876   | 1.53  | 9.7%   |
| Gnal    | 48.4989    | 0.40  | 0.8%   |
| Gnao1   | 156.5906   | 7.99  | 5.1%   |
| Gnaq    | 67.24938   | 3.73  | 5.5%   |
| Gna-rs1 | 32.71184   | 2.25  | 6.9%   |
| Gnas    | 968.9778   | 44.77 | 4.6%   |
| Gnat1   | 0.0290099  | 0.01  | 19.9%  |

|         |            |       |        |
|---------|------------|-------|--------|
| Gnat2   | 0.06689278 | 0.03  | 43.6%  |
| Gnat3   | 0.00523168 | 0.01  | 223.6% |
| Gnaz    | 24.62966   | 1.39  | 5.7%   |
| Gnb1    | 304.996    | 12.59 | 4.1%   |
| Gnb1l   | 1.0590704  | 0.13  | 12.3%  |
| Gnb2    | 92.28672   | 7.97  | 8.6%   |
| Gnb2l1  | 126.9248   | 11.56 | 9.1%   |
| Gnb3    | 0.1664736  | 0.08  | 47.5%  |
| Gnb4    | 9.337442   | 1.36  | 14.6%  |
| Gnb5    | 35.49338   | 1.07  | 3.0%   |
| Gne     | 9.274368   | 0.50  | 5.4%   |
| Gng10   | 17.2869    | 2.70  | 15.6%  |
| Gng11   | 0.592626   | 0.11  | 18.9%  |
| Gng12   | 19.80012   | 0.92  | 4.6%   |
| Gng13   | 4.819378   | 0.51  | 10.7%  |
| Gng2    | 94.72332   | 4.47  | 4.7%   |
| Gng3    | 183.1896   | 24.67 | 13.5%  |
| Gng3lg  | 3.534468   | 1.31  | 37.2%  |
| Gng4    | 32.15412   | 6.84  | 21.3%  |
| Gng5    | 3.042404   | 0.56  | 18.4%  |
| Gng7    | 6.345678   | 0.44  | 7.0%   |
| Gng8    | 0.10808732 | 0.06  | 56.2%  |
| Gngt1   | 0          | 0.00  |        |
| Gngt2   | 0          | 0.00  |        |
| Gnl2    | 15.99884   | 0.45  | 2.8%   |
| Gnl3    | 12.06326   | 0.31  | 2.6%   |
| Gnl3l   | 87.59038   | 2.64  | 3.0%   |
| Gnmt    | 0.2176336  | 0.07  | 32.8%  |
| Gnpat   | 17.42832   | 0.22  | 1.3%   |
| Gnpda1  | 3.382642   | 0.33  | 9.9%   |
| Gnpda2  | 8.301638   | 0.95  | 11.5%  |
| Gnpnat1 | 2.90004    | 0.40  | 13.8%  |
| Gnptab  | 21.69884   | 1.17  | 5.4%   |
| Gnptg   | 14.09552   | 0.61  | 4.3%   |
| Gnrh1   | 0.0681387  | 0.07  | 97.3%  |
| Gnrhr   | 0          | 0.00  |        |
| Gns     | 23.99082   | 0.53  | 2.2%   |
| GOBLIN  | 0.01963906 | 0.01  | 39.8%  |
| GODZ    | 4.24894    | 0.78  | 18.5%  |
| Golga1  | 5.78055    | 0.26  | 4.5%   |
| Golga2  | 21.39542   | 0.42  | 2.0%   |
| Golga3  | 9.84013    | 0.42  | 4.2%   |
| Golga4  | 10.650162  | 0.90  | 8.5%   |
| Golga5  | 7.075518   | 0.36  | 5.1%   |
| Golga7  | 24.3626    | 1.93  | 7.9%   |
| Golgb1  | 7.989198   | 0.44  | 5.5%   |
| Golim4  | 4.364186   | 0.29  | 6.7%   |



|             |            |      |        |
|-------------|------------|------|--------|
| Golm1       | 4.329096   | 0.82 | 18.8%  |
| Golph3      | 40.92216   | 1.09 | 2.7%   |
| Golph3l     | 6.806734   | 0.50 | 7.4%   |
| Golt1a      | 0.00796592 | 0.01 | 98.3%  |
| Golt1b      | 13.72294   | 0.56 | 4.0%   |
| Gon4l       | 6.539042   | 0.16 | 2.4%   |
| Gopc        | 25.26458   | 0.72 | 2.9%   |
| Gorasp1     | 7.128856   | 0.25 | 3.6%   |
| Gorasp2     | 39.69946   | 3.97 | 10.0%  |
| Gosr1       | 18.21416   | 0.25 | 1.4%   |
| Gosr2       | 30.5531    | 0.89 | 2.9%   |
| Got1        | 172.5404   | 7.56 | 4.4%   |
| Got1l1      | 0.3813028  | 0.08 | 20.5%  |
| Got2        | 51.91826   | 1.62 | 3.1%   |
| Gp1ba       | 0.5491644  | 0.10 | 18.4%  |
| Gp1bb       | 4.762426   | 0.54 | 11.4%  |
| Gp2         | 0          | 0.00 |        |
| Gp49a       | 0          | 0.00 |        |
| Gp5         | 0.09922854 | 0.03 | 28.6%  |
| Gp6         | 0          | 0.00 |        |
| Gp9         | 0          | 0.00 |        |
| Gpa33       | 0.02938986 | 0.02 | 67.0%  |
| Gpaa1       | 18.00454   | 1.20 | 6.7%   |
| GPalpha_IIb | 0.3056758  | 0.01 | 3.6%   |
| Gpam        | 10.95208   | 0.51 | 4.6%   |
| Gpatc1      | 0.20978128 | 0.09 | 44.2%  |
| Gpatch1     | 3.447354   | 0.19 | 5.6%   |
| Gpatch2     | 4.763186   | 0.25 | 5.2%   |
| Gpatch3     | 1.544482   | 0.14 | 9.4%   |
| Gpatch4     | 6.545776   | 0.94 | 14.3%  |
| Gpbar1      | 0          | 0.00 |        |
| GPBP        | 1.0166234  | 0.42 | 41.1%  |
| Gpbp1       | 25.8034    | 1.74 | 6.7%   |
| Gpbp1l1     | 4.1927     | 0.43 | 10.2%  |
| Gpc1        | 24.43506   | 1.51 | 6.2%   |
| Gpc2        | 6.325904   | 0.59 | 9.3%   |
| Gpc3        | 29.2244    | 5.90 | 20.2%  |
| Gpc4        | 5.749848   | 0.58 | 10.1%  |
| Gpc5        | 14.1286    | 0.70 | 4.9%   |
| Gpc6        | 4.066      | 0.31 | 7.7%   |
| Gpd1        | 0.7315756  | 0.13 | 17.4%  |
| Gpd1l       | 15.02542   | 1.01 | 6.7%   |
| Gpd2        | 9.019766   | 0.59 | 6.6%   |
| Gper        | 0.01697862 | 0.02 | 112.5% |
| Gpha2       | 0          | 0.00 |        |
| Gphb5       | 0          | 0.00 |        |
| Gphn        | 42.36262   | 4.14 | 9.8%   |

|         |             |      |        |
|---------|-------------|------|--------|
| Gpi1    | 123.594     | 8.29 | 6.7%   |
| Gpihbp1 | 0           | 0.00 |        |
| Gpkow   | 9.61498     | 0.35 | 3.7%   |
| Gpld1   | 1.507902    | 0.11 | 7.1%   |
| Gpm6a   | 305.3164    | 5.48 | 1.8%   |
| Gpm6b   | 82.98012    | 3.02 | 3.6%   |
| Gpnmb   | 0.03255722  | 0.01 | 33.2%  |
| Gpr1    | 0.10324344  | 0.03 | 31.0%  |
| Gpr101  | 4.671002    | 0.70 | 15.0%  |
| Gpr103  | 0.5372384   | 0.06 | 12.1%  |
| Gpr107  | 16.66598    | 0.66 | 4.0%   |
| Gpr108  | 5.1813      | 0.26 | 5.1%   |
| Gpr109a | 0           | 0.00 |        |
| Gpr110  | 0.00641876  | 0.01 | 92.5%  |
| Gpr111  | 0.09342172  | 0.03 | 36.0%  |
| Gpr112  | 0.000840496 | 0.00 | 223.6% |
| Gpr113  | 0.001849832 | 0.00 | 223.6% |
| Gpr114  | 0           | 0.00 |        |
| Gpr115  | 0.0916542   | 0.04 | 41.0%  |
| Gpr116  | 0.015013432 | 0.01 | 49.8%  |
| Gpr119  | 0.01643378  | 0.01 | 63.7%  |
| Gpr12   | 1.564756    | 0.15 | 9.7%   |
| Gpr120  | 0.03659332  | 0.03 | 93.3%  |
| Gpr123  | 5.56674     | 0.35 | 6.4%   |
| Gpr124  | 1.165454    | 0.10 | 8.8%   |
| Gpr125  | 5.153548    | 0.26 | 5.1%   |
| Gpr126  | 1.585254    | 0.07 | 4.6%   |
| Gpr128  | 0           | 0.00 |        |
| Gpr132  | 0.06532192  | 0.04 | 60.9%  |
| Gpr133  | 0.018065216 | 0.01 | 71.1%  |
| Gpr135  | 1.87899     | 0.17 | 8.9%   |
| Gpr137  | 52.86588    | 1.64 | 3.1%   |
| Gpr137b | 8.173586    | 0.37 | 4.5%   |
| Gpr139  | 3.78927     | 0.45 | 11.9%  |
| Gpr141  | 0.01077056  | 0.01 | 97.7%  |
| Gpr142  | 0.00597348  | 0.01 | 223.6% |
| Gpr143  | 0.00397862  | 0.01 | 223.6% |
| Gpr146  | 0.6443384   | 0.09 | 14.3%  |
| Gpr149  | 2.253526    | 0.20 | 8.9%   |
| Gpr15   | 0.7610866   | 0.18 | 23.9%  |
| Gpr150  | 0.3372416   | 0.11 | 31.4%  |
| Gpr151  | 0.11532524  | 0.03 | 28.3%  |
| Gpr152  | 0.02950182  | 0.01 | 36.6%  |
| Gpr153  | 14.40144    | 1.06 | 7.4%   |
| Gpr155  | 12.6707     | 0.53 | 4.2%   |
| Gpr156  | 0.7823202   | 0.04 | 4.9%   |
| Gpr157  | 0.9273026   | 0.09 | 9.6%   |

|         |            |      |        |
|---------|------------|------|--------|
| Gpr158  | 17.31018   | 1.05 | 6.1%   |
| Gpr160  | 0.03681262 | 0.02 | 46.1%  |
| Gpr161  | 3.43759    | 0.54 | 15.8%  |
| Gpr162  | 36.2366    | 1.27 | 3.5%   |
| Gpr165  | 1.2678992  | 0.38 | 29.9%  |
| Gpr17   | 0.6258188  | 0.26 | 41.8%  |
| Gpr171  | 0          | 0.00 |        |
| Gpr172b | 6.212176   | 0.72 | 11.7%  |
| Gpr173  | 4.915658   | 0.33 | 6.6%   |
| Gpr174  | 0.00892298 | 0.01 | 92.8%  |
| Gpr175  | 10.745206  | 1.33 | 12.4%  |
| Gpr176  | 2.572182   | 0.21 | 8.2%   |
| Gpr177  | 15.17904   | 1.08 | 7.1%   |
| Gpr179  | 0.02934328 | 0.01 | 31.4%  |
| Gpr18   | 0          | 0.00 |        |
| Gpr180  | 10.83974   | 0.98 | 9.0%   |
| Gpr19   | 6.49814    | 0.50 | 7.7%   |
| Gpr20   | 0.04151922 | 0.02 | 51.1%  |
| Gpr21   | 0.274941   | 0.10 | 37.5%  |
| Gpr22   | 12.79866   | 1.25 | 9.8%   |
| Gpr23   | 1.2272238  | 0.25 | 20.0%  |
| Gpr26   | 1.19272    | 0.15 | 12.2%  |
| Gpr27   | 1.978794   | 0.37 | 18.8%  |
| Gpr3    | 3.349588   | 0.34 | 10.1%  |
| Gpr31c  | 0          | 0.00 |        |
| Gpr33   | 0          | 0.00 |        |
| Gpr34   | 0.01383414 | 0.02 | 140.2% |
| Gpr35   | 0.0543959  | 0.03 | 50.3%  |
| Gpr37   | 0.7055882  | 0.11 | 15.6%  |
| Gpr3711 | 0.1052937  | 0.07 | 65.3%  |
| Gpr39   | 0.06733698 | 0.04 | 52.2%  |
| Gpr4    | 0.409118   | 0.09 | 22.7%  |
| Gpr44   | 0.17073    | 0.02 | 12.5%  |
| Gpr45   | 3.262892   | 0.10 | 3.1%   |
| Gpr50   | 1.1996132  | 0.18 | 14.9%  |
| Gpr55   | 0.02062642 | 0.03 | 127.0% |
| Gpr56   | 6.719562   | 0.50 | 7.5%   |
| Gpr6    | 0.08532972 | 0.06 | 76.1%  |
| Gpr61   | 5.47916    | 0.27 | 4.9%   |
| Gpr63   | 1.218714   | 0.15 | 12.3%  |
| Gpr64   | 0.9832718  | 0.05 | 4.8%   |
| Gpr65   | 0.00478544 | 0.01 | 223.6% |
| Gpr68   | 2.234236   | 0.18 | 8.0%   |
| Gpr75   | 3.188132   | 0.18 | 5.5%   |
| Gpr77   | 0.02979864 | 0.03 | 92.3%  |
| Gpr81   | 0          | 0.00 |        |
| Gpr82   | 0          | 0.00 |        |

|            |            |       |        |
|------------|------------|-------|--------|
| Gpr83      | 0.4906692  | 0.14  | 28.3%  |
| Gpr84      | 0.04277424 | 0.02  | 54.9%  |
| Gpr85      | 12.15224   | 1.16  | 9.5%   |
| Gpr87      | 0          | 0.00  |        |
| Gpr88      | 3.61206    | 0.26  | 7.2%   |
| Gpr89      | 11.94404   | 0.97  | 8.1%   |
| Gpr92      | 0.02062274 | 0.03  | 155.1% |
| Gpr97      | 0.00783722 | 0.01  | 93.9%  |
| Gpr98      | 0.1648266  | 0.01  | 7.0%   |
| Gprasp1    | 191.2342   | 6.72  | 3.5%   |
| Gprasp2    | 118.1822   | 4.34  | 3.7%   |
| Gprc2a-rs5 | 0.0637298  | 0.03  | 43.4%  |
| Gprc5a     | 0.12186512 | 0.05  | 44.2%  |
| Gprc5b     | 18.57954   | 2.29  | 12.3%  |
| Gprc5c     | 0.2125718  | 0.07  | 31.3%  |
| Gprc5d     | 0.01536652 | 0.01  | 92.7%  |
| Gprc6a     | 0.00524418 | 0.01  | 137.7% |
| Gprin1     | 20.1613    | 3.05  | 15.1%  |
| Gprin3     | 1.955336   | 0.30  | 15.2%  |
| Gps1       | 4.024082   | 0.18  | 4.5%   |
| Gps2       | 5.482224   | 0.34  | 6.2%   |
| Gpsm1      | 27.69176   | 2.08  | 7.5%   |
| Gpsm2      | 1.620266   | 0.24  | 14.6%  |
| Gpsm3      | 0.092657   | 0.05  | 56.5%  |
| Gpsn2      | 275.9816   | 25.42 | 9.2%   |
| Gpt1       | 1.639736   | 0.19  | 11.7%  |
| Gpt2       | 13.20042   | 0.37  | 2.8%   |
| Gpx1       | 31.3554    | 2.30  | 7.3%   |
| Gpx2       | 0.2694988  | 0.08  | 29.8%  |
| Gpx3       | 6.16591    | 0.71  | 11.5%  |
| Gpx4       | 18.94876   | 1.90  | 10.0%  |
| GPx4       | 0.2366172  | 0.09  | 38.9%  |
| Gpx5       | 0.00398858 | 0.01  | 223.6% |
| Gpx6       | 0.03215128 | 0.04  | 129.2% |
| Gpx7       | 0.5122906  | 0.12  | 22.7%  |
| Gramd1a    | 30.35      | 0.54  | 1.8%   |
| Gramd1b    | 6.52752    | 1.94  | 29.7%  |
| Gramd1c    | 0.15045566 | 0.06  | 39.8%  |
| Gramd2     | 0.8144764  | 0.11  | 13.3%  |
| Gramd3     | 1.73117    | 0.15  | 8.4%   |
| Gramp3     | 0.02708682 | 0.01  | 49.6%  |
| Grap       | 0.01114442 | 0.02  | 142.2% |
| Grap2      | 0          | 0.00  |        |
| Grasp      | 1.306694   | 0.16  | 12.4%  |
| Grb10      | 42.8893    | 2.85  | 6.6%   |
| Grb14      | 4.420896   | 0.42  | 9.5%   |
| Grb2       | 43.48748   | 2.45  | 5.6%   |

|         |             |       |        |
|---------|-------------|-------|--------|
| Grb7    | 0.1586716   | 0.04  | 26.5%  |
| GRC     | 0.335481    | 0.07  | 22.3%  |
| Grcc10  | 69.01974    | 5.72  | 8.3%   |
| Great   | 0           | 0.00  |        |
| Greb1   | 0.05466824  | 0.01  | 21.9%  |
| Grem1   | 0.4512694   | 0.05  | 11.7%  |
| Grem2   | 14.21266    | 0.48  | 3.4%   |
| Grg4    | 0.03112128  | 0.01  | 18.5%  |
| Grhl1   | 0.3251626   | 0.05  | 15.6%  |
| Grhl2   | 0.026992794 | 0.02  | 82.8%  |
| Grhl3   | 0.4272306   | 0.09  | 21.4%  |
| Grhpr   | 9.746666    | 1.62  | 16.6%  |
| Gria1   | 30.35608    | 0.80  | 2.6%   |
| Gria2   | 60.77608    | 4.62  | 7.6%   |
| Gria3   | 19.70934    | 1.96  | 9.9%   |
| Gria4   | 67.54714    | 3.46  | 5.1%   |
| Grid1   | 21.62912    | 0.95  | 4.4%   |
| Grid2   | 11.0825     | 0.62  | 5.6%   |
| Grid2ip | 0.1561936   | 0.03  | 21.8%  |
| Grifin  | 0.01960266  | 0.03  | 139.4% |
| Grik1   | 5.235484    | 0.54  | 10.4%  |
| Grik2   | 9.172482    | 0.74  | 8.1%   |
| Grik3   | 9.686086    | 0.97  | 10.0%  |
| Grik4   | 6.51067     | 0.17  | 2.6%   |
| Grik5   | 33.36404    | 1.33  | 4.0%   |
| Grin1   | 122.381     | 6.18  | 5.0%   |
| Grin2a  | 2.127506    | 0.28  | 13.2%  |
| Grin2b  | 2.3164      | 0.66  | 28.6%  |
| Grin2c  | 0.04316324  | 0.01  | 32.8%  |
| Grin2d  | 7.605112    | 0.41  | 5.4%   |
| Grin3b  | 0.6538906   | 0.10  | 15.1%  |
| Grina   | 267.7604    | 11.70 | 4.4%   |
| Grinl1a | 102.43636   | 2.48  | 2.4%   |
| Grip1   | 6.533838    | 0.86  | 13.1%  |
| Grip2   | 7.741148    | 0.56  | 7.2%   |
| Gripap1 | 21.03256    | 1.15  | 5.4%   |
| Grit    | 8.406346    | 0.71  | 8.4%   |
| Grk1    | 0.00396513  | 0.01  | 137.0% |
| Grk4    | 0.51786     | 0.08  | 14.8%  |
| Grk5    | 2.120722    | 0.17  | 8.2%   |
| Grk6    | 17.71076    | 1.17  | 6.6%   |
| GRK6    | 2.9203294   | 1.95  | 66.6%  |
| Grlf1   | 40.72074    | 1.76  | 4.3%   |
| Grm1    | 2.443274    | 0.26  | 10.8%  |
| Grm2    | 0.3390048   | 0.13  | 37.6%  |
| Grm3    | 4.035222    | 0.67  | 16.6%  |
| Grm4    | 9.94198     | 1.08  | 10.9%  |

|         |            |      |        |
|---------|------------|------|--------|
| Grm5    | 16.30998   | 1.72 | 10.5%  |
| Grm6    | 0          | 0.00 |        |
| Grm7    | 18.03178   | 0.34 | 1.9%   |
| Grm8    | 3.685954   | 0.15 | 4.1%   |
| Grm8A   | 0.07063578 | 0.03 | 45.0%  |
| Grn     | 22.46354   | 1.21 | 5.4%   |
| Grp     | 1.588414   | 0.50 | 31.4%  |
| Grpel1  | 12.17208   | 0.78 | 6.4%   |
| Grpel2  | 5.243292   | 0.62 | 11.8%  |
| Grpr    | 0.809517   | 0.18 | 22.0%  |
| Grrp1   | 0.7027654  | 0.13 | 18.6%  |
| Grsf1   | 46.50674   | 1.34 | 2.9%   |
| Grtp1   | 1.532514   | 0.24 | 15.8%  |
| Grwd1   | 5.92121    | 0.94 | 15.8%  |
| Gsbs    | 0.12055546 | 0.04 | 35.6%  |
| Gsc     | 0.10823006 | 0.04 | 37.8%  |
| Gscl    | 0.02013542 | 0.02 | 95.6%  |
| Gsdm1   | 0          | 0.00 |        |
| Gsdm2   | 0.03779352 | 0.04 | 105.5% |
| Gsdm3   | 0.00350166 | 0.01 | 223.6% |
| Gsdmdc1 | 0.07574196 | 0.04 | 57.1%  |
| Gsdmdc2 | 0.0060025  | 0.01 | 223.6% |
| Gse1    | 7.868918   | 0.31 | 3.9%   |
| Gsg1    | 0.0392721  | 0.03 | 76.8%  |
| Gsg2    | 0.1498112  | 0.07 | 45.7%  |
| Gsk3a   | 53.63812   | 3.21 | 6.0%   |
| Gsk3b   | 59.93602   | 1.58 | 2.6%   |
| Gsn     | 5.030608   | 0.49 | 9.7%   |
| Gspt1   | 28.7742    | 1.22 | 4.3%   |
| Gspt2   | 14.7455    | 0.79 | 5.3%   |
| Gsr     | 14.20678   | 0.92 | 6.5%   |
| Gss     | 4.764438   | 1.16 | 24.3%  |
| Gsta1   | 0.1205304  | 0.09 | 74.5%  |
| Gsta2   | 0.04398174 | 0.03 | 72.8%  |
| Gsta3   | 0.2696346  | 0.12 | 44.1%  |
| Gsta4   | 23.42582   | 1.03 | 4.4%   |
| Gstcd   | 2.566818   | 0.31 | 11.9%  |
| Gstk1   | 1.1255202  | 0.35 | 31.0%  |
| Gstm1   | 16.2988    | 1.04 | 6.4%   |
| Gstm2   | 0.7185984  | 0.31 | 42.6%  |
| Gstm3   | 0.0412993  | 0.06 | 151.7% |
| Gstm4   | 3.103326   | 0.53 | 17.2%  |
| Gstm5   | 17.25072   | 0.72 | 4.2%   |
| Gstm6   | 0.1552204  | 0.06 | 36.0%  |
| Gstm7   | 0.8067144  | 0.17 | 21.0%  |
| Gsto1   | 27.5366    | 1.92 | 7.0%   |
| Gsto2   | 0.20066782 | 0.09 | 44.3%  |

|          |            |       |        |
|----------|------------|-------|--------|
| Gstp1    | 24.15676   | 1.66  | 6.9%   |
| Gstp2    | 5.825104   | 0.73  | 12.5%  |
| Gstt1    | 0.8476806  | 0.23  | 27.0%  |
| Gstt2    | 0.3945734  | 0.06  | 16.4%  |
| Gstt3    | 1.4415354  | 0.40  | 27.9%  |
| Gstt4    | 0.00685378 | 0.02  | 223.6% |
| Gstz1    | 15.53824   | 1.13  | 7.3%   |
| Gsx1     | 0.2391706  | 0.09  | 39.0%  |
| Gsx2     | 0.05538532 | 0.03  | 60.5%  |
| Gt4-1    | 1.4173506  | 0.50  | 35.5%  |
| Gtdc1    | 9.329096   | 0.48  | 5.1%   |
| Gtf2a1   | 6.875158   | 0.67  | 9.7%   |
| Gtf2a1l  | 0.00782138 | 0.01  | 141.7% |
| Gtf2a2   | 17.71884   | 1.39  | 7.8%   |
| Gtf2b    | 10.14522   | 0.37  | 3.6%   |
| Gtf2e1   | 7.268688   | 0.48  | 6.6%   |
| Gtf2e2   | 7.498716   | 0.30  | 4.0%   |
| Gtf2f1   | 19.1732    | 0.55  | 2.8%   |
| Gtf2f2   | 5.975696   | 0.73  | 12.2%  |
| Gtf2h1   | 10.98682   | 0.48  | 4.4%   |
| Gtf2h2   | 8.527836   | 0.63  | 7.4%   |
| Gtf2h3   | 5.238332   | 0.36  | 6.8%   |
| Gtf2h4   | 3.12294    | 0.31  | 10.0%  |
| Gtf2h5   | 36.67018   | 1.84  | 5.0%   |
| Gtf2i    | 41.00384   | 1.06  | 2.6%   |
| Gtf2ird1 | 6.748048   | 0.39  | 5.7%   |
| Gtf2ird2 | 3.641552   | 0.41  | 11.3%  |
| Gtf3a    | 4.288346   | 0.99  | 23.2%  |
| Gtf3c1   | 13.37816   | 0.59  | 4.4%   |
| Gtf3c2   | 10.107466  | 0.32  | 3.2%   |
| Gtf3c3   | 9.395312   | 0.36  | 3.8%   |
| Gtf3c4   | 11.283136  | 0.82  | 7.2%   |
| Gtf3c5   | 6.712426   | 0.61  | 9.1%   |
| Gtf3c6   | 7.010768   | 1.08  | 15.5%  |
| Gtl-13   | 0.0952143  | 0.02  | 22.2%  |
| Gtl2     | 193.5778   | 33.03 | 17.1%  |
| Gtl3     | 17.49138   | 1.10  | 6.3%   |
| Gtlf3a   | 0.8658356  | 0.10  | 11.1%  |
| Gtlf3b   | 3.176418   | 0.13  | 4.0%   |
| Gtpbp1   | 11.94956   | 1.23  | 10.3%  |
| Gtpbp10  | 1.402982   | 0.13  | 9.5%   |
| Gtpbp2   | 13.0046    | 1.08  | 8.3%   |
| Gtpbp3   | 6.349328   | 0.23  | 3.7%   |
| Gtpbp4   | 12.7436    | 0.58  | 4.6%   |
| Gtpbp5   | 4.975924   | 0.35  | 7.1%   |
| Gtpbp6   | 17.49586   | 1.73  | 9.9%   |
| Gtpbp8   | 9.476314   | 0.82  | 8.6%   |

|          |             |      |        |
|----------|-------------|------|--------|
| Gtrgeo22 | 19.06198    | 1.87 | 9.8%   |
| Gtse1    | 1.308078    | 0.08 | 6.2%   |
| Guca1a   | 0.03613048  | 0.04 | 104.7% |
| Guca1b   | 0           | 0.00 |        |
| Guca2a   | 0           | 0.00 |        |
| Guca2b   | 0           | 0.00 |        |
| Gucy1a2  | 7.424394    | 1.33 | 17.9%  |
| Gucy1a3  | 0.345682    | 0.04 | 10.9%  |
| Gucy1b2  | 0.01011104  | 0.01 | 144.3% |
| Gucy1b3  | 27.377      | 0.80 | 2.9%   |
| Gucy2c   | 0.06266834  | 0.02 | 35.0%  |
| Gucy2d   | 0.00782348  | 0.02 | 223.6% |
| Gucy2e   | 0.02732746  | 0.02 | 63.7%  |
| Gucy2f   | 0.004952586 | 0.00 | 94.2%  |
| Gucy2g   | 0.0025493   | 0.01 | 223.6% |
| Guf1     | 10.674112   | 1.62 | 15.1%  |
| Guk1     | 51.65906    | 3.23 | 6.2%   |
| Gulo     | 0.01229692  | 0.01 | 109.1% |
| Gulp1    | 1.989888    | 0.33 | 16.6%  |
| Gusb     | 3.749422    | 0.18 | 4.9%   |
| Gvin1    | 0           | 0.00 |        |
| Gyg      | 16.73412    | 1.65 | 9.9%   |
| Gyk      | 7.662742    | 0.34 | 4.5%   |
| Gykl1    | 0.00316736  | 0.01 | 223.6% |
| Gyltl1b  | 0.15630688  | 0.09 | 54.8%  |
| Gypa     | 0.03148058  | 0.04 | 115.9% |
| Gypc     | 0.2886548   | 0.07 | 25.1%  |
| Gys1     | 6.651216    | 0.64 | 9.6%   |
| Gys2     | 0.01635452  | 0.01 | 83.7%  |
| Gzf1     | 9.310016    | 0.48 | 5.2%   |
| Gzma     | 0           | 0.00 |        |
| Gzmb     | 0           | 0.00 |        |
| Gzmc     | 0.07629104  | 0.06 | 74.3%  |
| Gzmd     | 0           | 0.00 |        |
| Gzme     | 0           | 0.00 |        |
| Gzmf     | 0.00409728  | 0.01 | 223.6% |
| Gzmg     | 0           | 0.00 |        |
| Gzmk     | 0.02135098  | 0.03 | 145.6% |
| Gzmm     | 0.3994456   | 0.13 | 32.5%  |
| Gzmn     | 0           | 0.00 |        |
| H13      | 21.56134    | 1.70 | 7.9%   |
| H19      | 0.12232386  | 0.05 | 39.6%  |
| H1f0     | 0.02876812  | 0.01 | 42.4%  |
| H1fnt    | 0.00334316  | 0.01 | 223.6% |
| H1foo    | 0           | 0.00 |        |
| H1fx     | 12.24604    | 1.18 | 9.6%   |
| H28      | 0.10364044  | 0.04 | 42.0%  |



|            |             |      |        |
|------------|-------------|------|--------|
| H2-Aa      | 0.01408562  | 0.02 | 142.2% |
| H2-Ab1     | 1.4655496   | 0.60 | 40.8%  |
| H2afj      | 5.420242    | 0.50 | 9.3%   |
| H2afv      | 0.709884    | 0.40 | 56.4%  |
| H2afx      | 15.50824    | 0.77 | 5.0%   |
| H2afy      | 27.00014    | 0.65 | 2.4%   |
| H2afy2     | 7.866186    | 1.33 | 16.9%  |
| H2afz      | 3.029172    | 0.31 | 10.1%  |
| H2-B2      | 2.67893     | 1.12 | 41.9%  |
| H2-BI      | 5.383458    | 0.65 | 12.0%  |
| H2-D1      | 28.94692    | 2.69 | 9.3%   |
| H2-DMa     | 3.691872    | 0.37 | 9.9%   |
| H2-DMb1    | 0.093708574 | 0.08 | 90.5%  |
| H2-DMb2    | 0.07241612  | 0.08 | 105.3% |
| H2-Ea      | 0           | 0.00 |        |
| H2-Eb1     | 0.01793286  | 0.01 | 60.5%  |
| H2-Eb2     | 0.01701868  | 0.01 | 64.0%  |
| H2-GS14    | 0.05063308  | 0.01 | 24.3%  |
| H2-K1      | 9.297162    | 0.75 | 8.1%   |
| H2-Ke2     | 17.4693     | 1.81 | 10.4%  |
| H2-Ke6     | 5.654       | 0.70 | 12.4%  |
| H2-M1      | 0.01375974  | 0.02 | 138.6% |
| H2-M10.1   | 0           | 0.00 |        |
| H2-M10.2   | 0.03103296  | 0.02 | 68.2%  |
| H2-M10.3   | 0           | 0.00 |        |
| H2-M10.4   | 0.01231648  | 0.02 | 138.6% |
| H2-M10.5   | 0.00374818  | 0.01 | 223.6% |
| H2-M10.6   | 0.00349616  | 0.01 | 223.6% |
| H2-M11     | 0           | 0.00 |        |
| H2-M2      | 0.0657702   | 0.07 | 99.8%  |
| H2-M3      | 0.5389386   | 0.09 | 16.0%  |
| H2-M5      | 0.3311066   | 0.10 | 29.8%  |
| H2-M9      | 0           | 0.00 |        |
| H2-Oa      | 0.001076478 | 0.00 | 223.6% |
| H2-Ob      | 0           | 0.00 |        |
| H2-Q1      | 1.0746968   | 0.18 | 16.6%  |
| H2-Q10     | 1.0630002   | 0.12 | 11.3%  |
| H2-Q2      | 0.8635584   | 0.19 | 22.0%  |
| H2-Q6      | 1.2499864   | 0.39 | 31.0%  |
| H2-Q7      | 1.4453288   | 0.33 | 23.1%  |
| H2-Q8      | 0.06880494  | 0.04 | 60.2%  |
| H2-T10     | 0.827257    | 0.39 | 47.4%  |
| H2-T22     | 1.1354034   | 0.17 | 14.8%  |
| H2-T23     | 2.11885     | 0.68 | 32.1%  |
| H2-T24     | 0.01204968  | 0.02 | 152.8% |
| H2-T3      | 0.04454878  | 0.01 | 22.3%  |
| H2-T3-like | 0.03168976  | 0.01 | 25.4%  |

|         |            |      |        |
|---------|------------|------|--------|
| H2-T9   | 0.06586762 | 0.03 | 40.1%  |
| H2-Tw3  | 0.0568637  | 0.01 | 25.4%  |
| H3f3a   | 5.628404   | 0.50 | 8.9%   |
| H3f3b   | 53.2399    | 2.68 | 5.0%   |
| H4      | 0          | 0.00 |        |
| H47     | 17.65712   | 1.06 | 6.0%   |
| H6pd    | 3.060832   | 0.21 | 6.8%   |
| Haao    | 0.06904732 | 0.03 | 47.0%  |
| Habp2   | 0.04389274 | 0.03 | 68.7%  |
| Habp4   | 37.99218   | 1.90 | 5.0%   |
| hac1    | 1.2078262  | 0.34 | 28.4%  |
| Hace1   | 7.550988   | 0.54 | 7.1%   |
| Hacl1   | 1.0468574  | 0.17 | 15.8%  |
| Hadh    | 6.425788   | 0.42 | 6.5%   |
| Hadha   | 13.7054    | 0.52 | 3.8%   |
| Hadhb   | 1.447222   | 0.14 | 9.9%   |
| Hagh    | 26.50024   | 0.53 | 2.0%   |
| Haghl   | 51.71802   | 2.03 | 3.9%   |
| Hai2    | 1.43214    | 0.19 | 13.2%  |
| Hal     | 0.02114014 | 0.03 | 132.4% |
| Hamp1   | 0          | 0.00 |        |
| Hamp2   | 0          | 0.00 |        |
| Hand1   | 0          | 0.00 |        |
| Hand2   | 0.5618852  | 0.07 | 12.0%  |
| Hao1    | 0.01483416 | 0.01 | 96.7%  |
| Hao3    | 0          | 0.00 |        |
| Hap1    | 172.6194   | 9.30 | 5.4%   |
| Hapln1  | 9.252402   | 1.17 | 12.6%  |
| Hapln2  | 0.2217164  | 0.08 | 38.1%  |
| Hapln3  | 0.04536108 | 0.04 | 86.6%  |
| Hapln4  | 11.684766  | 2.29 | 19.6%  |
| Hars    | 49.8122    | 2.70 | 5.4%   |
| Hars2   | 5.46439    | 0.19 | 3.6%   |
| Has1    | 0.08212534 | 0.05 | 56.7%  |
| Has2    | 0.2072608  | 0.05 | 26.1%  |
| Has3    | 0.4695554  | 0.07 | 15.4%  |
| Hat1    | 8.973958   | 0.60 | 6.7%   |
| Hausp   | 3.090238   | 0.46 | 14.9%  |
| Havcr1  | 0          | 0.00 |        |
| Havcr2  | 0.01091022 | 0.01 | 116.0% |
| Hax1    | 4.935802   | 0.62 | 12.6%  |
| Hba-a2  | 0.0085597  | 0.02 | 223.6% |
| Hba-x   | 0          | 0.00 |        |
| Hbb-b1  | 0          | 0.00 |        |
| Hbb-bh1 | 0          | 0.00 |        |
| Hbb-y   | 0          | 0.00 |        |
| Hbegf   | 2.48635    | 0.17 | 7.0%   |

|         |            |      |        |
|---------|------------|------|--------|
| Hbld1   | 18.04894   | 1.29 | 7.1%   |
| Hbp1    | 10.67884   | 0.82 | 7.7%   |
| Hbp2    | 0.0509713  | 0.02 | 44.7%  |
| Hbq1    | 0          | 0.00 |        |
| Hbs1l   | 18.25714   | 0.38 | 2.1%   |
| Hbxip   | 14.20052   | 0.64 | 4.5%   |
| Hc      | 0.01143728 | 0.02 | 138.9% |
| Hccs    | 9.96035    | 0.42 | 4.2%   |
| Hcfc1   | 17.34184   | 0.65 | 3.8%   |
| Hcfc1r1 | 41.54094   | 5.46 | 13.1%  |
| Hcfc2   | 6.461322   | 0.49 | 7.5%   |
| Hck     | 0.1868748  | 0.04 | 22.2%  |
| Hcls1   | 0.02990758 | 0.02 | 83.5%  |
| Hcn1    | 8.17776    | 0.53 | 6.5%   |
| Hcn2    | 40.51356   | 1.12 | 2.8%   |
| Hcn3    | 19.37066   | 2.40 | 12.4%  |
| Hcn4    | 6.506896   | 0.62 | 9.5%   |
| Hcrt    | 0.03372916 | 0.04 | 105.9% |
| Hcrtr1  | 1.569594   | 0.37 | 23.7%  |
| Hcrtr2  | 3.302664   | 0.39 | 11.7%  |
| Hcst    | 0.04795882 | 0.04 | 93.0%  |
| Hdac1   | 0.6779666  | 0.09 | 13.9%  |
| Hdac10  | 2.862462   | 0.20 | 7.0%   |
| Hdac11  | 105.74856  | 3.98 | 3.8%   |
| Hdac2   | 45.32918   | 2.42 | 5.3%   |
| Hdac3   | 49.10018   | 1.30 | 2.6%   |
| Hdac4   | 8.104434   | 1.34 | 16.6%  |
| Hdac5   | 24.49906   | 0.78 | 3.2%   |
| HDAC5   | 3.009836   | 0.28 | 9.3%   |
| Hdac6   | 18.27982   | 0.46 | 2.5%   |
| Hdac7a  | 10.44013   | 1.00 | 9.6%   |
| Hdac8   | 3.067872   | 0.47 | 15.2%  |
| Hdac9   | 2.630782   | 0.34 | 12.8%  |
| Hdc     | 0.14013146 | 0.04 | 32.0%  |
| Hddc2   | 9.305092   | 0.92 | 9.9%   |
| Hddc3   | 19.21792   | 1.13 | 5.9%   |
| Hdgf    | 37.62668   | 1.10 | 2.9%   |
| Hdgfl1  | 0          | 0.00 |        |
| Hdgfrp2 | 16.62212   | 0.53 | 3.2%   |
| Hdgfrp3 | 30.66196   | 2.35 | 7.7%   |
| Hdh     | 9.475454   | 0.85 | 8.9%   |
| Hdhd1a  | 0.0456256  | 0.04 | 91.3%  |
| Hdhd2   | 20.17438   | 0.85 | 4.2%   |
| Hdhd3   | 2.825242   | 0.30 | 10.5%  |
| Hdlbp   | 50.5296    | 1.45 | 2.9%   |
| Hdrpa   | 1.1831138  | 0.24 | 19.9%  |
| Hdx     | 0.6535258  | 0.10 | 15.5%  |

|         |            |      |        |
|---------|------------|------|--------|
| Heatr1  | 2.98974    | 0.13 | 4.2%   |
| Heatr2  | 1.461454   | 0.16 | 10.9%  |
| Heatr3  | 12.66194   | 0.62 | 4.9%   |
| Heatr5a | 1.65272    | 0.05 | 2.9%   |
| Heatr5b | 20.7964    | 1.04 | 5.0%   |
| Heatr6  | 4.297354   | 0.10 | 2.3%   |
| Hebp1   | 4.289542   | 0.63 | 14.6%  |
| Hebp2   | 1.406776   | 0.17 | 12.2%  |
| Heca    | 7.293886   | 0.68 | 9.3%   |
| Hectd1  | 15.9591    | 0.71 | 4.4%   |
| Hectd2  | 4.963482   | 0.19 | 3.9%   |
| Hectd3  | 10.57188   | 0.33 | 3.1%   |
| Hecw1   | 17.86864   | 0.59 | 3.3%   |
| Hecw2   | 6.770238   | 0.45 | 6.6%   |
| Heg1    | 0.7306684  | 0.12 | 16.3%  |
| Hel308  | 2.052754   | 0.22 | 10.8%  |
| Helb    | 0.6543766  | 0.04 | 5.7%   |
| helB    | 0.20455622 | 0.09 | 44.8%  |
| HELG    | 4.683008   | 1.05 | 22.4%  |
| Hells   | 2.420692   | 0.16 | 6.8%   |
| Helt    | 0.00709836 | 0.01 | 139.0% |
| Helz    | 2.4678     | 0.32 | 13.0%  |
| Hemgn   | 0          | 0.00 |        |
| Hemk1   | 5.656272   | 0.25 | 4.4%   |
| Hemk2   | 2.923266   | 0.60 | 20.4%  |
| HemT    | 0          | 0.00 |        |
| Hemt1   | 0.003713   | 0.01 | 223.6% |
| Hepacam | 2.057656   | 0.36 | 17.5%  |
| Heph    | 0.3683908  | 0.05 | 12.8%  |
| Heph11  | 0.00751616 | 0.01 | 94.3%  |
| Herc1   | 20.56652   | 0.95 | 4.6%   |
| Herc2   | 9.24921    | 0.68 | 7.3%   |
| Herc3   | 36.32114   | 1.15 | 3.2%   |
| Herc4   | 4.861124   | 0.33 | 6.7%   |
| Herc5   | 0.36629494 | 0.16 | 43.0%  |
| Herpud1 | 26.7214    | 0.87 | 3.2%   |
| Herpud2 | 14.37078   | 0.77 | 5.3%   |
| Hes1    | 2.403316   | 0.51 | 21.3%  |
| Hes2    | 0          | 0.00 |        |
| Hes3    | 0.00677194 | 0.01 | 139.7% |
| Hes5    | 0.5587346  | 0.11 | 20.2%  |
| Hes6    | 13.13354   | 1.21 | 9.2%   |
| Hes7    | 0.436461   | 0.16 | 36.3%  |
| Hesx1   | 0          | 0.00 |        |
| Hexa    | 15.23596   | 0.84 | 5.5%   |
| Hexb    | 15.56314   | 1.15 | 7.4%   |
| Hexdc   | 9.371924   | 1.39 | 14.8%  |

|          |            |      |        |
|----------|------------|------|--------|
| Hexim1   | 10.365228  | 0.52 | 5.0%   |
| Hexim2   | 8.434602   | 0.68 | 8.1%   |
| Hey1     | 8.695812   | 0.74 | 8.5%   |
| Hey2     | 0.933355   | 0.11 | 11.4%  |
| Heyl     | 0.09270078 | 0.02 | 25.2%  |
| Hfe      | 0.1647244  | 0.06 | 36.8%  |
| Hfe2     | 0.00311822 | 0.01 | 223.6% |
| Hfm1     | 0.4038204  | 0.08 | 19.3%  |
| Hgd      | 0.0255104  | 0.02 | 75.8%  |
| Hgf      | 0.0505552  | 0.04 | 71.7%  |
| Hgfac    | 0.02637474 | 0.02 | 76.8%  |
| Hgfl     | 0.3691226  | 0.09 | 25.5%  |
| Hgs      | 31.94546   | 1.18 | 3.7%   |
| Hgsnat   | 17.93868   | 0.62 | 3.4%   |
| Hhat     | 0.8595588  | 0.10 | 11.3%  |
| Hhatl    | 0.03942234 | 0.04 | 99.5%  |
| Hhex     | 0.186004   | 0.03 | 18.3%  |
| Hhip     | 1.224054   | 0.06 | 5.2%   |
| Hiat1    | 21.8783    | 1.40 | 6.4%   |
| Hiatl1   | 12.04868   | 0.78 | 6.4%   |
| Hibadh   | 22.31676   | 1.00 | 4.5%   |
| Hibch    | 9.786824   | 0.40 | 4.1%   |
| Hic1     | 2.131194   | 0.16 | 7.6%   |
| Hic2     | 1.425556   | 0.11 | 7.5%   |
| hide1    | 0.00213792 | 0.00 | 223.6% |
| Hif1a    | 34.86454   | 1.73 | 5.0%   |
| Hif1an   | 16.92642   | 0.36 | 2.1%   |
| Hif3a    | 0.3933952  | 0.11 | 27.7%  |
| Higd1a   | 47.77784   | 3.05 | 6.4%   |
| Higd1b   | 0          | 0.00 |        |
| Higd1c   | 0.02728141 | 0.02 | 78.3%  |
| Higd2a   | 57.5104    | 4.93 | 8.6%   |
| Hils1    | 0.00624292 | 0.01 | 223.6% |
| Hint1    | 166.527    | 9.68 | 5.8%   |
| Hint2    | 11.7754    | 0.69 | 5.9%   |
| Hint3    | 11.69512   | 0.73 | 6.2%   |
| Hip1     | 7.149156   | 0.13 | 1.9%   |
| Hip1r    | 10.4392    | 0.34 | 3.3%   |
| Hip2     | 36.41992   | 1.32 | 3.6%   |
| Hipk1    | 10.247954  | 0.98 | 9.6%   |
| Hipk2    | 4.528392   | 0.72 | 16.0%  |
| Hipk3    | 8.843986   | 0.66 | 7.4%   |
| Hipk4    | 10.86425   | 0.71 | 6.6%   |
| Hira     | 11.9438    | 0.61 | 5.1%   |
| Hirip3   | 3.696026   | 0.29 | 8.0%   |
| Hisppd1  | 10.001972  | 0.76 | 7.6%   |
| Hisppd2a | 40.26098   | 2.78 | 6.9%   |

|           |            |      |        |
|-----------|------------|------|--------|
| Hist1h1a  | 0.02330722 | 0.04 | 159.7% |
| Hist1h1b  | 0.02350248 | 0.02 | 95.4%  |
| Hist1h1c  | 4.780472   | 0.85 | 17.8%  |
| Hist1h1d  | 0.05482844 | 0.04 | 72.0%  |
| Hist1h1e  | 0.08234214 | 0.01 | 11.4%  |
| Hist1h1t  | 0          | 0.00 |        |
| Hist1h2aa | 0          | 0.00 |        |
| Hist1h2ab | 0.02852    | 0.06 | 223.6% |
| Hist1h2ac | 0.07436566 | 0.04 | 50.5%  |
| Hist1h2ae | 0.00628448 | 0.01 | 223.6% |
| Hist1h2af | 0.01206122 | 0.03 | 223.6% |
| Hist1h2ag | 0          | 0.00 |        |
| Hist1h2ah | 0          | 0.00 |        |
| Hist1h2ai | 0.0155702  | 0.03 | 223.6% |
| Hist1h2ak | 0.01642526 | 0.04 | 223.6% |
| Hist1h2an | 0          | 0.00 |        |
| Hist1h2ao | 0          | 0.00 |        |
| Hist1h2ba | 0.10004338 | 0.07 | 68.0%  |
| Hist1h2bb | 0.1048297  | 0.08 | 78.2%  |
| Hist1h2bc | 4.473932   | 0.72 | 16.2%  |
| Hist1h2be | 0.14494258 | 0.03 | 23.4%  |
| Hist1h2bf | 0.05550062 | 0.03 | 58.7%  |
| Hist1h2bg | 0.1057994  | 0.10 | 93.6%  |
| Hist1h2bh | 0          | 0.00 |        |
| Hist1h2bj | 0          | 0.00 |        |
| Hist1h2bk | 0          | 0.00 |        |
| Hist1h2bl | 0.01323658 | 0.03 | 223.6% |
| Hist1h2bm | 0          | 0.00 |        |
| Hist1h2bn | 0          | 0.00 |        |
| Hist1h2bp | 0.0358181  | 0.05 | 146.9% |
| Hist1h3a  | 0          | 0.00 |        |
| Hist1h3b  | 0          | 0.00 |        |
| Hist1h3c  | 0          | 0.00 |        |
| Hist1h3d  | 0.07436272 | 0.02 | 29.0%  |
| Hist1h3e  | 0.04433102 | 0.07 | 160.6% |
| Hist1h3f  | 0          | 0.00 |        |
| Hist1h3g  | 0          | 0.00 |        |
| Hist1h3h  | 0.02168126 | 0.03 | 142.5% |
| Hist1h3i  | 0          | 0.00 |        |
| Hist1h4a  | 0.04687276 | 0.07 | 154.5% |
| Hist1h4b  | 0.0035836  | 0.01 | 223.6% |
| Hist1h4c  | 0.04065538 | 0.06 | 138.4% |
| Hist1h4d  | 0.06898664 | 0.07 | 99.6%  |
| Hist1h4f  | 0          | 0.00 |        |
| Hist1h4h  | 0.15094916 | 0.09 | 58.9%  |
| Hist1h4i  | 0.4980544  | 0.21 | 42.1%  |
| Hist1h4j  | 0          | 0.00 |        |

|            |             |      |        |
|------------|-------------|------|--------|
| Hist1h4k   | 0.01579198  | 0.04 | 223.6% |
| Hist1h4m   | 0           | 0.00 |        |
| Hist2h2aa2 | 0.07395832  | 0.06 | 85.1%  |
| Hist2h2ab  | 0.01657762  | 0.04 | 223.6% |
| Hist2h2ac  | 0.01675052  | 0.04 | 223.6% |
| Hist2h2bb  | 1.1726106   | 0.32 | 27.6%  |
| Hist2h2be  | 1.0201432   | 0.20 | 19.4%  |
| Hist2h3b   | 0           | 0.00 |        |
| Hist2h3c1  | 0.2843508   | 0.05 | 16.3%  |
| Hist2h4    | 0.21226198  | 0.16 | 73.3%  |
| Hist3h2a   | 19.42678    | 1.46 | 7.5%   |
| Hist3h2ba  | 20.1809     | 2.86 | 14.2%  |
| Hist3h2bb  | 0.1934278   | 0.10 | 51.9%  |
| Hist4h4    | 0.05952744  | 0.06 | 99.9%  |
| Hivep1     | 5.691692    | 0.79 | 13.9%  |
| Hivep2     | 10.54007    | 0.55 | 5.3%   |
| Hivep3     | 1.286032    | 0.11 | 8.4%   |
| Hk1        | 97.7112     | 2.34 | 2.4%   |
| Hk2        | 2.04391     | 0.67 | 32.6%  |
| Hk3        | 0.00833094  | 0.01 | 139.4% |
| Hkdc1      | 0.2539476   | 0.08 | 30.6%  |
| Hlcs       | 5.192824    | 0.33 | 6.3%   |
| Hlf        | 3.681512    | 0.71 | 19.2%  |
| HLS2       | 0.000156898 | 0.00 | 223.6% |
| Hltf       | 3.876428    | 0.37 | 9.6%   |
| Hlx        | 0.4131782   | 0.05 | 12.9%  |
| Hm13       | 4.349688    | 0.35 | 8.0%   |
| Hmbox1     | 13.09812    | 1.16 | 8.9%   |
| Hmbs       | 1.766016    | 0.10 | 5.4%   |
| Hmcn1      | 0.08819154  | 0.02 | 22.4%  |
| Hmcn2      | 0.01451768  | 0.00 | 26.0%  |
| Hmg20a     | 19.63724    | 0.41 | 2.1%   |
| Hmg20b     | 2.485512    | 0.23 | 9.3%   |
| Hmga1      | 3.08845     | 0.19 | 6.0%   |
| Hmga2      | 0.3541814   | 0.11 | 30.5%  |
| Hmgb1      | 2.98551     | 0.33 | 11.0%  |
| Hmgb2      | 0.5262468   | 0.12 | 22.8%  |
| Hmgb2l1    | 4.644372    | 0.37 | 8.1%   |
| Hmgb3      | 15.23108    | 1.94 | 12.7%  |
| Hmgb4      | 0.00636722  | 0.01 | 223.6% |
| Hmgcl      | 6.728952    | 0.85 | 12.6%  |
| Hmgcll1    | 2.845176    | 0.24 | 8.3%   |
| Hmgcr      | 58.64318    | 5.25 | 9.0%   |
| Hmgcs1     | 0           | 0.00 |        |
| Hmgcs2     | 0.12678102  | 0.07 | 58.9%  |
| Hmgn1      | 18.11048    | 0.83 | 4.6%   |
| Hmgn2      | 0.849792    | 0.11 | 12.6%  |

|             |             |      |        |
|-------------|-------------|------|--------|
| Hmgn3       | 16.84552    | 0.77 | 4.5%   |
| Hmgx2       | 0.4633678   | 0.14 | 30.2%  |
| Hmha1       | 0.031933634 | 0.02 | 74.5%  |
| Hmmr        | 0.5357728   | 0.13 | 23.7%  |
| Hmox1       | 7.217252    | 0.12 | 1.6%   |
| Hmox2       | 26.847      | 1.32 | 4.9%   |
| Hmx1        | 0.9202798   | 0.16 | 17.0%  |
| Hmx2        | 0.2078472   | 0.06 | 30.9%  |
| Hmx3        | 0.7382584   | 0.09 | 11.9%  |
| Hn1         | 32.0519     | 5.40 | 16.9%  |
| Hn1l        | 4.99993     | 0.91 | 18.2%  |
| Hnf1a       | 0.4792426   | 0.06 | 12.9%  |
| Hnf1b       | 0.254015    | 0.04 | 17.3%  |
| Hnf4a       | 0.13133222  | 0.04 | 28.3%  |
| Hnf4g       | 0.00480284  | 0.01 | 223.6% |
| Hnmt        | 1.75385     | 0.32 | 18.1%  |
| hnRNP_A2/B1 | 9.925156    | 1.66 | 16.8%  |
| hnRNP_X     | 2.02679     | 0.55 | 27.0%  |
| Hnrnpa1     | 12.20122    | 1.01 | 8.3%   |
| Hnrnpa2b1   | 84.08552    | 4.14 | 4.9%   |
| Hnrnpc      | 31.51676    | 1.07 | 3.4%   |
| Hnrnpl      | 46.12148    | 3.69 | 8.0%   |
| Hnrnpr      | 17.02794    | 1.45 | 8.5%   |
| Hnrnpu      | 76.53156    | 3.08 | 4.0%   |
| Hnrpa3      | 7.320804    | 0.59 | 8.0%   |
| Hnrpab      | 33.8264     | 2.98 | 8.8%   |
| Hnrpd       | 29.79296    | 1.53 | 5.1%   |
| Hnrpdl      | 32.29402    | 2.65 | 8.2%   |
| Hnrpf       | 4.402642    | 0.35 | 7.9%   |
| Hnrph1      | 68.30942    | 2.19 | 3.2%   |
| Hnrph2      | 20.9855     | 0.48 | 2.3%   |
| Hnrph3      | 14.63768    | 1.31 | 8.9%   |
| Hnrpk       | 45.91198    | 3.01 | 6.6%   |
| Hnrpll      | 14.22962    | 0.69 | 4.8%   |
| Hnrpm       | 32.90312    | 0.39 | 1.2%   |
| Hnrpr       | 0.772134    | 0.27 | 35.1%  |
| Hnrpul1     | 20.63464    | 0.29 | 1.4%   |
| Hnrpul2     | 45.04146    | 1.71 | 3.8%   |
| Hnt         | 44.87764    | 1.51 | 3.4%   |
| Homer1      | 8.60914     | 0.76 | 8.8%   |
| Homer2      | 1.754774    | 0.23 | 13.1%  |
| Homer3      | 4.001352    | 0.78 | 19.4%  |
| Homez       | 2.993132    | 0.08 | 2.8%   |
| Hook1       | 10.681398   | 1.23 | 11.5%  |
| Hook2       | 6.034626    | 0.37 | 6.2%   |
| Hook3       | 7.4885      | 0.80 | 10.7%  |
| Hopx        | 0.5815266   | 0.26 | 45.0%  |



|         |             |      |        |
|---------|-------------|------|--------|
| Hormad1 | 0           | 0.00 |        |
| Hormad2 | 0.00429356  | 0.01 | 223.6% |
| Hoxa1   | 0.9296568   | 0.23 | 25.1%  |
| Hoxa10  | 0.1376375   | 0.06 | 42.9%  |
| Hoxa11  | 0.002244661 | 0.00 | 199.7% |
| Hoxa13  | 0.2539634   | 0.10 | 38.9%  |
| Hoxa2   | 3.636712    | 0.56 | 15.5%  |
| Hoxa3   | 6.012596    | 0.48 | 8.0%   |
| Hoxa4   | 6.697456    | 0.79 | 11.7%  |
| Hoxa5   | 46.24906    | 2.90 | 6.3%   |
| Hoxa6   | 13.2245     | 1.19 | 9.0%   |
| Hoxa7   | 9.998272    | 0.50 | 5.0%   |
| Hoxa9   | 1.111874    | 0.10 | 8.6%   |
| Hoxb1   | 0.00456784  | 0.01 | 223.6% |
| Hoxb13  | 1.646034    | 0.30 | 18.5%  |
| Hoxb2   | 5.374946    | 0.41 | 7.6%   |
| Hoxb3   | 10.248434   | 1.05 | 10.3%  |
| Hoxb4   | 3.506876    | 0.27 | 7.8%   |
| Hoxb5   | 17.98204    | 0.91 | 5.0%   |
| Hoxb6   | 15.2389     | 1.22 | 8.0%   |
| Hoxb7   | 22.15044    | 2.48 | 11.2%  |
| Hoxb8   | 77.03724    | 7.62 | 9.9%   |
| Hoxb9   | 24.97388    | 3.21 | 12.9%  |
| Hoxc10  | 1.08551     | 0.08 | 7.4%   |
| Hoxc11  | 0           | 0.00 |        |
| Hoxc12  | 0           | 0.00 |        |
| Hoxc13  | 0.428542    | 0.05 | 11.6%  |
| Hoxc4   | 33.72062    | 5.47 | 16.2%  |
| Hoxc5   | 27.4799     | 4.27 | 15.5%  |
| Hoxc6   | 45.83498    | 6.12 | 13.3%  |
| Hoxc8   | 8.45258     | 1.20 | 14.2%  |
| Hoxc9   | 2.181338    | 0.24 | 10.8%  |
| Hoxd1   | 0.05303438  | 0.03 | 64.9%  |
| Hoxd10  | 0.05069648  | 0.03 | 57.1%  |
| Hoxd11  | 0.0159875   | 0.01 | 92.5%  |
| Hoxd12  | 0           | 0.00 |        |
| Hoxd13  | 0.19673     | 0.02 | 9.2%   |
| Hoxd3   | 9.370684    | 0.43 | 4.6%   |
| Hoxd4   | 3.185102    | 0.31 | 9.6%   |
| Hoxd8   | 9.10656     | 0.70 | 7.7%   |
| Hoxd9   | 4.622364    | 0.40 | 8.7%   |
| Hp      | 0.03349798  | 0.03 | 78.7%  |
| Hp1bp3  | 40.45398    | 0.95 | 2.3%   |
| Hpca    | 25.12444    | 4.15 | 16.5%  |
| Hpcal1  | 70.1555     | 3.58 | 5.1%   |
| Hpcal4  | 13.62906    | 0.96 | 7.0%   |
| Hpd     | 0           | 0.00 |        |

|          |            |       |        |
|----------|------------|-------|--------|
| Hpd1     | 0.0996352  | 0.05  | 48.6%  |
| Hpgd     | 0.15506724 | 0.04  | 25.6%  |
| Hpn      | 0.5258202  | 0.16  | 29.6%  |
| Hprt1    | 120.2308   | 1.74  | 1.4%   |
| Hps1     | 2.025684   | 0.19  | 9.4%   |
| Hps3     | 6.336126   | 0.34  | 5.4%   |
| Hps4     | 5.730638   | 0.42  | 7.4%   |
| Hps5     | 2.05463    | 0.17  | 8.2%   |
| Hps6     | 2.66836    | 0.40  | 15.0%  |
| Hpse     | 0.831225   | 0.24  | 28.3%  |
| Hpx      | 0.14652584 | 0.08  | 51.6%  |
| Hr       | 0.419268   | 0.09  | 21.4%  |
| H-ras    | 1.0179286  | 0.27  | 26.4%  |
| Hras1    | 55.23716   | 3.64  | 6.6%   |
| Hrasls   | 0.3322404  | 0.09  | 26.7%  |
| Hrasls3  | 1.450176   | 0.19  | 12.9%  |
| Hrasls5  | 0.00558028 | 0.01  | 223.6% |
| Hrb      | 28.45262   | 1.36  | 4.8%   |
| Hrbl     | 13.09018   | 1.57  | 12.0%  |
| Hrc      | 0.0815347  | 0.03  | 38.2%  |
| Hrg      | 0          | 0.00  |        |
| Hrh1     | 0.3033654  | 0.06  | 20.6%  |
| Hrh2     | 0.11153496 | 0.04  | 32.4%  |
| Hrh3     | 0.7619894  | 0.26  | 33.5%  |
| Hrh4     | 0.00460664 | 0.01  | 223.6% |
| Hrk      | 4.200932   | 0.77  | 18.4%  |
| Hrn      | 0          | 0.00  |        |
| Hrsp12   | 19.26548   | 1.01  | 5.2%   |
| Hs1bp3   | 1.675494   | 0.17  | 10.1%  |
| Hs2st    | 1.1060096  | 0.58  | 52.1%  |
| Hs2st1   | 17.1182    | 0.43  | 2.5%   |
| Hs3st1   | 5.489628   | 1.26  | 22.9%  |
| Hs3st2   | 9.027446   | 0.61  | 6.8%   |
| Hs3st3a1 | 0.4499118  | 0.07  | 14.7%  |
| Hs3st3b1 | 2.100494   | 0.12  | 5.7%   |
| Hs3st5   | 12.76558   | 0.83  | 6.5%   |
| Hs3st6   | 0.05390504 | 0.04  | 74.4%  |
| Hs6st1   | 21.2624    | 1.80  | 8.5%   |
| Hs6st2   | 35.45526   | 0.90  | 2.5%   |
| Hs6st3   | 5.904166   | 0.61  | 10.3%  |
| Hsbp1    | 176.6034   | 12.96 | 7.3%   |
| Hscb     | 4.419292   | 0.42  | 9.6%   |
| Hsd11b1  | 0.6091134  | 0.39  | 63.7%  |
| Hsd11b2  | 0.06435242 | 0.04  | 54.8%  |
| Hsd17b1  | 0.12131818 | 0.03  | 25.1%  |
| Hsd17b10 | 13.66666   | 1.26  | 9.2%   |
| Hsd17b11 | 4.199758   | 0.45  | 10.6%  |

|          |             |       |        |
|----------|-------------|-------|--------|
| Hsd17b12 | 46.31684    | 4.39  | 9.5%   |
| Hsd17b13 | 0.00446862  | 0.01  | 223.6% |
| Hsd17b14 | 0.08902608  | 0.03  | 33.3%  |
| Hsd17b2  | 0.0237639   | 0.02  | 99.2%  |
| Hsd17b3  | 0.00510516  | 0.01  | 223.6% |
| Hsd17b4  | 15.08344    | 0.71  | 4.7%   |
| Hsd17b6  | 0           | 0.00  |        |
| Hsd17b7  | 11.220786   | 1.80  | 16.1%  |
| Hsd3b1   | 0           | 0.00  |        |
| Hsd3b2   | 1.274324    | 1.14  | 89.6%  |
| Hsd3b3   | 0.43141392  | 0.53  | 122.4% |
| Hsd3b4   | 0           | 0.00  |        |
| Hsd3b5   | 0           | 0.00  |        |
| Hsd3b6   | 0           | 0.00  |        |
| Hsd3b7   | 5.556128    | 0.73  | 13.1%  |
| Hsd1     | 22.05466    | 0.43  | 2.0%   |
| Hsd12    | 10.80032    | 0.48  | 4.5%   |
| Hsf1     | 11.246192   | 0.84  | 7.5%   |
| Hsf2     | 12.47122    | 0.85  | 6.9%   |
| Hsf2bp   | 0.3513796   | 0.08  | 21.8%  |
| Hsf4     | 1.928682    | 0.33  | 16.9%  |
| Hsf5     | 0.05983726  | 0.03  | 43.1%  |
| Hsfy2    | 0           | 0.00  |        |
| Hsh2d    | 0.04627368  | 0.04  | 84.2%  |
| Hsn2     | 3.529042    | 0.67  | 19.0%  |
| Hsp110   | 39.92606    | 1.73  | 4.3%   |
| Hsp25    | 0.09514456  | 0.05  | 54.3%  |
| Hsp90aa1 | 88.14658    | 3.11  | 3.5%   |
| Hsp90ab1 | 459.2732    | 23.42 | 5.1%   |
| Hsp90b1  | 140.2132    | 6.93  | 4.9%   |
| Hspa12a  | 82.38212    | 3.59  | 4.4%   |
| Hspa12b  | 0.8250588   | 0.10  | 11.9%  |
| Hspa14   | 12.53856    | 1.64  | 13.1%  |
| Hspa1a   | 1.1942808   | 0.30  | 24.8%  |
| Hspa1b   | 0.6004632   | 0.08  | 12.9%  |
| Hspa1l   | 1.321942    | 0.10  | 7.6%   |
| Hspa2    | 2.987694    | 0.46  | 15.3%  |
| Hspa4    | 69.7078     | 2.29  | 3.3%   |
| Hspa4l   | 36.81004    | 2.24  | 6.1%   |
| Hspa5    | 142.484     | 6.39  | 4.5%   |
| Hspa8    | 48.27552    | 2.91  | 6.0%   |
| Hspa9    | 81.5536     | 4.05  | 5.0%   |
| Hspb1    | 0.05619648  | 0.04  | 70.5%  |
| Hspb2    | 0.1374536   | 0.31  | 223.6% |
| Hspb3    | 0           | 0.00  |        |
| Hspb6    | 4.41867     | 0.49  | 11.2%  |
| Hspb7    | 0.001728326 | 0.00  | 223.6% |

|               |             |      |        |
|---------------|-------------|------|--------|
| Hspb8         | 0.7586732   | 0.19 | 25.3%  |
| Hspbap1       | 0.7870126   | 0.10 | 13.1%  |
| Hspc171       | 19.76346    | 2.59 | 13.1%  |
| Hspd1         | 43.14724    | 1.86 | 4.3%   |
| Hspe          | 0.09296122  | 0.06 | 66.8%  |
| Hspe1         | 24.28418    | 1.39 | 5.7%   |
| Hspg2         | 3.435848    | 1.09 | 31.6%  |
| Htatip        | 22.30184    | 0.67 | 3.0%   |
| Htatip2       | 0.4011556   | 0.18 | 44.2%  |
| Htatsf1       | 21.42972    | 2.94 | 13.7%  |
| Htf9c         | 8.134992    | 0.17 | 2.1%   |
| Htr1a         | 4.405996    | 0.27 | 6.2%   |
| Htr1b         | 3.4554418   | 1.84 | 53.3%  |
| Htr1d         | 0.2505624   | 0.06 | 23.0%  |
| Htr1f         | 0.03416864  | 0.03 | 77.2%  |
| Htr2a         | 6.485528    | 0.82 | 12.6%  |
| Htr2b         | 0.01619778  | 0.02 | 139.2% |
| Htr2c         | 46.51112    | 5.15 | 11.1%  |
| Htr3a         | 0.07764886  | 0.03 | 43.3%  |
| Htr3b         | 0.02939726  | 0.03 | 86.5%  |
| Htr4          | 1.772444    | 0.32 | 17.8%  |
| Htr5a         | 0.7344406   | 0.03 | 3.7%   |
| Htr5b         | 0.05585322  | 0.05 | 82.7%  |
| Htr6          | 0.7168226   | 0.13 | 18.5%  |
| Htr7          | 13.4136     | 0.80 | 6.0%   |
| Htra1         | 3.876146    | 0.46 | 11.8%  |
| Htra2         | 12.1696     | 0.69 | 5.7%   |
| HtrA2         | 3.647658    | 0.24 | 6.6%   |
| Htra3         | 0.1830822   | 0.08 | 42.9%  |
| Htra4         | 0.04526718  | 0.01 | 16.1%  |
| Hunk          | 1.160938    | 0.07 | 5.7%   |
| Hus1          | 3.57905     | 0.17 | 4.8%   |
| Hus1b         | 0.0085326   | 0.02 | 223.6% |
| Huwe1         | 26.03748    | 3.98 | 15.3%  |
| Hvcn1         | 2.886178    | 0.21 | 7.1%   |
| Hyal1         | 0.1582466   | 0.06 | 37.6%  |
| Hyal2         | 2.831494    | 0.29 | 10.4%  |
| Hyal3         | 0.12895     | 0.06 | 46.6%  |
| Hyal4         | 0           | 0.00 |        |
| Hyal5         | 0           | 0.00 |        |
| Hydin         | 0.007980134 | 0.01 | 69.0%  |
| Hyi           | 5.264928    | 1.28 | 24.3%  |
| Hyls1         | 2.018148    | 0.21 | 10.4%  |
| Hyou1         | 39.55788    | 2.22 | 5.6%   |
| Hypc          | 3.392594    | 0.53 | 15.7%  |
| I830077J02Rik | 0.00485004  | 0.01 | 223.6% |
| lah1          | 7.581676    | 0.95 | 12.5%  |

|         |             |       |        |
|---------|-------------|-------|--------|
| IAN5    | 0           | 0.00  |        |
| IAP     | 0.0119791   | 0.03  | 223.6% |
| lapp    | 0.02349532  | 0.03  | 137.0% |
| lars    | 17.15012    | 0.41  | 2.4%   |
| lars2   | 12.29682    | 0.69  | 5.6%   |
| lbrdc3  | 22.87626    | 3.72  | 16.3%  |
| lbsp    | 0           | 0.00  |        |
| lbtck   | 3.383454    | 0.57  | 16.7%  |
| lca1    | 16.8565     | 1.09  | 6.5%   |
| lca1l   | 11.8227     | 1.19  | 10.1%  |
| lcam1   | 0.6457282   | 0.18  | 27.5%  |
| lcam2   | 0.0200618   | 0.03  | 141.7% |
| lcam4   | 0.11850572  | 0.08  | 64.6%  |
| lcam5   | 3.147846    | 0.43  | 13.7%  |
| lck     | 4.755232    | 0.24  | 5.0%   |
| lcmt    | 13.85012    | 0.52  | 3.7%   |
| lcos    | 0.00488564  | 0.01  | 223.6% |
| lcosl   | 0.624345    | 0.10  | 16.5%  |
| lct1    | 16.10844    | 1.80  | 11.2%  |
| ld1     | 1.705846    | 0.23  | 13.7%  |
| ld2     | 10.862992   | 1.34  | 12.3%  |
| ld3     | 4.17069     | 1.09  | 26.1%  |
| ld4     | 31.5009     | 2.41  | 7.6%   |
| lde     | 27.54334    | 2.27  | 8.2%   |
| ldh1    | 59.40266    | 10.50 | 17.7%  |
| ldh2    | 12.6444     | 0.86  | 6.8%   |
| ldh3a   | 111.8572    | 4.38  | 3.9%   |
| ldh3b   | 96.88924    | 2.03  | 2.1%   |
| ldh3g   | 64.9573     | 1.16  | 1.8%   |
| ldi1    | 8.059934    | 1.50  | 18.6%  |
| ldi2    | 0.00841578  | 0.01  | 154.2% |
| lds     | 101.4859    | 1.78  | 1.8%   |
| ldua    | 0.3430624   | 0.10  | 28.0%  |
| ler2    | 1.249484    | 0.14  | 11.3%  |
| ler3    | 5.908066    | 1.02  | 17.2%  |
| ler3ip1 | 32.18686    | 2.23  | 6.9%   |
| ler5    | 1.644636    | 0.14  | 8.4%   |
| ler5l   | 1.982818    | 0.20  | 10.3%  |
| if3     | 0           | 0.00  |        |
| if5     | 0.000802998 | 0.00  | 223.6% |
| ifi202b | 0.20186712  | 0.12  | 58.7%  |
| ifi203  | 0.07806748  | 0.03  | 37.5%  |
| ifi204  | 0.0873205   | 0.08  | 88.0%  |
| ifi205  | 0.00216546  | 0.00  | 223.6% |
| ifi27   | 0.23086192  | 0.17  | 71.7%  |
| ifi30   | 3.304346    | 0.30  | 9.0%   |
| ifi35   | 0.202891    | 0.05  | 26.8%  |

|        |            |      |        |
|--------|------------|------|--------|
| lfi44  | 0.01744944 | 0.02 | 137.6% |
| lfi47  | 0.01209818 | 0.01 | 94.5%  |
| lfi4h1 | 0.1769684  | 0.07 | 39.2%  |
| lfit1  | 0.2220392  | 0.10 | 45.7%  |
| lfit2  | 2.874002   | 0.28 | 9.7%   |
| lfit3  | 0.454101   | 0.14 | 31.8%  |
| lfitm1 | 0.2874498  | 0.19 | 67.4%  |
| lfitm2 | 10.533136  | 2.03 | 19.3%  |
| lfitm3 | 4.26954    | 1.32 | 31.0%  |
| lfitm5 | 0.04711848 | 0.03 | 67.5%  |
| lfitm6 | 0.08975096 | 0.07 | 72.8%  |
| lfitm7 | 0.1519114  | 0.02 | 12.4%  |
| lfltd1 | 0.11337054 | 0.03 | 30.8%  |
| lfna1  | 0          | 0.00 |        |
| lfna11 | 0          | 0.00 |        |
| lfna12 | 0          | 0.00 |        |
| lfna13 | 0          | 0.00 |        |
| lfna14 | 0          | 0.00 |        |
| lfna2  | 0          | 0.00 |        |
| lfna4  | 0          | 0.00 |        |
| lfna5  | 0          | 0.00 |        |
| lfna6  | 0          | 0.00 |        |
| lfna7  | 0          | 0.00 |        |
| lfna9  | 0.00766738 | 0.02 | 223.6% |
| lfnab  | 0.00636132 | 0.01 | 223.6% |
| lfnar1 | 13.80418   | 0.73 | 5.3%   |
| lfnar2 | 4.016648   | 0.31 | 7.7%   |
| lfnb1  | 0          | 0.00 |        |
| lfne1  | 0          | 0.00 |        |
| lfng   | 0          | 0.00 |        |
| lfngr1 | 5.217078   | 0.68 | 12.9%  |
| lfngr2 | 31.02626   | 4.01 | 12.9%  |
| lfnk   | 0.04664774 | 0.06 | 135.8% |
| lfnz   | 0          | 0.00 |        |
| lfrd1  | 12.45022   | 1.69 | 13.6%  |
| lfrd2  | 1.042672   | 0.17 | 16.0%  |
| lfrg15 | 17.83452   | 1.28 | 7.2%   |
| lft122 | 4.292978   | 0.12 | 2.8%   |
| lft140 | 2.848476   | 0.11 | 3.7%   |
| lft172 | 9.948214   | 0.53 | 5.3%   |
| lft20  | 28.58164   | 1.51 | 5.3%   |
| lft52  | 13.21432   | 0.71 | 5.4%   |
| lft57  | 6.2653     | 0.44 | 7.0%   |
| lft74  | 5.51452    | 0.23 | 4.1%   |
| lft80  | 3.711212   | 0.25 | 6.8%   |
| lft81  | 8.44729    | 0.51 | 6.0%   |
| lft88  | 5.987948   | 0.32 | 5.3%   |

|                       |            |       |        |
|-----------------------|------------|-------|--------|
| Ig[gamma]1/CH[gamma]1 | 0          | 0.00  |        |
| Igbp1                 | 13.28932   | 0.36  | 2.7%   |
| Igbp1b                | 0.01092806 | 0.01  | 94.2%  |
| Igf1                  | 1.317372   | 0.08  | 5.9%   |
| Igf1r                 | 3.025032   | 0.16  | 5.2%   |
| Igf2                  | 342.0172   | 77.70 | 22.7%  |
| Igf2bp1               | 0.10669928 | 0.04  | 35.1%  |
| Igf2bp2               | 1.098686   | 0.15  | 13.2%  |
| Igf2bp3               | 1.397268   | 0.18  | 13.0%  |
| Igf2r                 | 7.953026   | 1.20  | 15.0%  |
| Igfals                | 0.00229714 | 0.01  | 223.6% |
| Igfbp1                | 0.12286616 | 0.04  | 31.9%  |
| Igfbp2                | 38.41952   | 6.56  | 17.1%  |
| Igfbp3                | 20.97016   | 3.00  | 14.3%  |
| Igfbp4                | 50.64636   | 8.71  | 17.2%  |
| Igfbp5                | 67.26982   | 5.36  | 8.0%   |
| Igfbp6                | 0.3911728  | 0.13  | 33.8%  |
| Igfbp7                | 6.684174   | 1.51  | 22.6%  |
| Igfbp11               | 0.4904776  | 0.06  | 12.5%  |
| Igfl3                 | 0          | 0.00  |        |
| Igh                   | 0.00273242 | 0.01  | 223.6% |
| Igha                  | 0          | 0.00  |        |
| Igh-A_(1g2)           | 0.00861676 | 0.02  | 223.6% |
| Ighg                  | 0.00271094 | 0.01  | 223.6% |
| Ighmbp2               | 3.720238   | 0.47  | 12.6%  |
| Igj                   | 0.08395646 | 0.10  | 116.3% |
| Igll1                 | 0          | 0.00  |        |
| Igsf1                 | 3.743024   | 0.37  | 9.8%   |
| Igsf10                | 2.01863    | 0.39  | 19.3%  |
| Igsf11                | 2.373692   | 0.17  | 7.0%   |
| Igsf2                 | 0.0024035  | 0.01  | 223.6% |
| Igsf21                | 10.882218  | 1.83  | 16.8%  |
| Igsf3                 | 7.548704   | 0.36  | 4.8%   |
| Igsf5                 | 0.40655122 | 0.85  | 208.1% |
| Igsf6                 | 0.0232878  | 0.02  | 82.3%  |
| Igsf8                 | 37.60114   | 2.29  | 6.1%   |
| Igsf9                 | 0.9375634  | 0.10  | 10.3%  |
| Igsf9b                | 8.255832   | 1.09  | 13.2%  |
| Igtp                  | 0.1989434  | 0.07  | 34.1%  |
| IHABP                 | 0.175436   | 0.02  | 10.2%  |
| Ihh                   | 0.5252312  | 0.13  | 24.9%  |
| Ihpk1                 | 43.68234   | 2.98  | 6.8%   |
| Ihpk2                 | 40.6205    | 2.56  | 6.3%   |
| Ihpk3                 | 0.01031054 | 0.01  | 141.8% |
| IIGP                  | 0          | 0.00  |        |
| Iigp1                 | 0.07510052 | 0.02  | 30.8%  |
| Iigp2                 | 0.2010206  | 0.06  | 31.4%  |

|              |             |      |        |
|--------------|-------------|------|--------|
| Ik           | 32.38702    | 0.66 | 2.0%   |
| IkappaB-zeta | 0.05055552  | 0.05 | 104.1% |
| Ikbkap       | 22.4041     | 1.61 | 7.2%   |
| Ikbkb        | 6.104686    | 0.34 | 5.6%   |
| Ikbke        | 0.1395396   | 0.03 | 18.3%  |
| Ikbkg        | 9.528134    | 0.67 | 7.0%   |
| Ikkb         | 0.013480718 | 0.01 | 74.5%  |
| IKKbeta      | 1.5303254   | 0.47 | 30.7%  |
| Ikzf1        | 0.02307183  | 0.02 | 66.0%  |
| Ikzf2        | 0.2757252   | 0.09 | 31.0%  |
| Ikzf3        | 0           | 0.00 |        |
| Ikzf4        | 2.446238    | 0.10 | 4.0%   |
| Ikzf5        | 3.861918    | 0.07 | 1.8%   |
| Il10         | 0           | 0.00 |        |
| Il10r2       | 0.2479184   | 0.07 | 28.6%  |
| Il10ra       | 0.12079772  | 0.03 | 22.6%  |
| Il10rb       | 0.499386    | 0.10 | 19.8%  |
| Il11         | 0.13325494  | 0.06 | 42.4%  |
| Il11ra1      | 7.519738    | 0.85 | 11.3%  |
| Il11ra2      | 0.1337274   | 0.04 | 27.1%  |
| Il12a        | 0.03270598  | 0.03 | 89.5%  |
| Il12b        | 0           | 0.00 |        |
| Il12rb1      | 0.032595222 | 0.02 | 57.4%  |
| Il12rb2      | 0.5163612   | 0.12 | 22.9%  |
| Il13         | 0           | 0.00 |        |
| Il13ra1      | 0.9500358   | 0.10 | 10.3%  |
| Il13ra2      | 0.02375804  | 0.02 | 80.7%  |
| Il15         | 0.00550546  | 0.01 | 223.6% |
| Il15ra       | 0.4012508   | 0.10 | 24.3%  |
| Il15ra       | 0.16129408  | 0.08 | 47.0%  |
| Il16         | 0.07893838  | 0.02 | 19.1%  |
| Il17a        | 0           | 0.00 |        |
| Il17b        | 0.0046658   | 0.01 | 223.6% |
| Il17c        | 0.0203612   | 0.05 | 223.6% |
| Il17d        | 2.528808    | 0.23 | 9.1%   |
| Il17f        | 0.0050526   | 0.01 | 223.6% |
| Il17ra       | 1.171982    | 0.10 | 8.7%   |
| Il17rb       | 0.020161048 | 0.02 | 82.1%  |
| Il17rc       | 0.5488968   | 0.12 | 21.2%  |
| Il17rd       | 1.429366    | 0.13 | 9.0%   |
| Il17re       | 0.00681342  | 0.01 | 143.6% |
| Il18         | 1.896624    | 0.17 | 8.9%   |
| Il18bp       | 1.505426    | 0.17 | 11.1%  |
| Il18r1       | 0.00212438  | 0.00 | 223.6% |
| Il18rap      | 0           | 0.00 |        |
| Il19         | 0.01500362  | 0.02 | 137.0% |
| Il1a         | 0.05040272  | 0.03 | 64.1%  |



|          |             |      |        |
|----------|-------------|------|--------|
| II1b     | 0.00267354  | 0.01 | 223.6% |
| II1e     | 0           | 0.00 |        |
| II1f10   | 0           | 0.00 |        |
| II1f5    | 0           | 0.00 |        |
| II1f6    | 0           | 0.00 |        |
| II1f8    | 0           | 0.00 |        |
| II1f9    | 0           | 0.00 |        |
| II1r1    | 0.18186228  | 0.07 | 38.0%  |
| II1r2    | 0.04433872  | 0.03 | 61.3%  |
| II1rap   | 1.931916    | 0.24 | 12.5%  |
| II1rapl1 | 1.1418992   | 0.20 | 17.1%  |
| II1rapl2 | 1.179124    | 0.09 | 7.9%   |
| II1rl1   | 0.003223318 | 0.00 | 141.3% |
| II1rl2   | 0.05184     | 0.03 | 48.8%  |
| II1rn    | 0.0033323   | 0.01 | 223.6% |
| II2      | 0           | 0.00 |        |
| II20     | 0           | 0.00 |        |
| II20ra   | 0.02238526  | 0.01 | 64.4%  |
| II20rb   | 0.1840006   | 0.04 | 20.9%  |
| II21     | 0.07033418  | 0.03 | 39.2%  |
| II21r    | 0.001737168 | 0.00 | 223.6% |
| II22     | 0           | 0.00 |        |
| II22ra1  | 0           | 0.00 |        |
| II22ra2  | 0           | 0.00 |        |
| II23a    | 0.02788478  | 0.03 | 95.0%  |
| II23r    | 0.0058673   | 0.01 | 137.0% |
| II24     | 0           | 0.00 |        |
| II25     | 0.13656004  | 0.08 | 60.9%  |
| II27     | 0           | 0.00 |        |
| II27ra   | 0.03788462  | 0.02 | 51.6%  |
| II28     | 0           | 0.00 |        |
| II28ra   | 0.10007138  | 0.00 | 4.1%   |
| II2ra    | 0.016420608 | 0.01 | 58.6%  |
| II2rb    | 0.0292946   | 0.02 | 74.2%  |
| II2rg    | 0.05772876  | 0.04 | 65.8%  |
| II3      | 0.00645536  | 0.01 | 223.6% |
| II31     | 0           | 0.00 |        |
| II31ra   | 0.03802042  | 0.03 | 66.3%  |
| II33     | 2.904852    | 0.32 | 11.2%  |
| II3ra    | 1.477606    | 0.24 | 16.3%  |
| II4      | 0.01807012  | 0.02 | 137.6% |
| II4-4    | 0.01126678  | 0.03 | 223.6% |
| II4i1    | 1.9725312   | 1.15 | 58.2%  |
| II4ra    | 0.2378768   | 0.04 | 18.2%  |
| II5      | 0.07121488  | 0.03 | 43.9%  |
| II5ra    | 0           | 0.00 |        |
| II6      | 0           | 0.00 |        |

|           |             |      |        |
|-----------|-------------|------|--------|
| Il6ra     | 0.09349398  | 0.04 | 41.7%  |
| Il6st     | 15.59752    | 0.85 | 5.4%   |
| Il7       | 0.07312748  | 0.01 | 14.8%  |
| Il7r      | 0           | 0.00 |        |
| Il8ra     | 0.0052464   | 0.01 | 223.6% |
| Il8rb     | 0           | 0.00 |        |
| Il9       | 0           | 0.00 |        |
| Il9r      | 0.004409012 | 0.01 | 139.4% |
| Illdr1    | 0.05549712  | 0.04 | 63.9%  |
| Ilf2      | 35.67386    | 2.16 | 6.1%   |
| Ilf3      | 25.41112    | 0.64 | 2.5%   |
| Ilk       | 12.87344    | 0.67 | 5.2%   |
| Ilkap     | 15.79872    | 1.28 | 8.1%   |
| Iltifb    | 0           | 0.00 |        |
| IL-TIFb   | 0           | 0.00 |        |
| Ilvbl     | 13.50622    | 0.64 | 4.7%   |
| Impmp1l   | 1.226986    | 0.23 | 18.8%  |
| Impmp2l   | 1.97975     | 0.30 | 15.1%  |
| Immt      | 56.0122     | 2.24 | 4.0%   |
| Imp3      | 9.927804    | 0.97 | 9.8%   |
| Imp4      | 5.182924    | 0.38 | 7.4%   |
| Impa1     | 16.32212    | 0.75 | 4.6%   |
| IMPA1     | 0.2125628   | 0.05 | 23.6%  |
| Impa2     | 2.164       | 0.34 | 15.7%  |
| Impact    | 59.48332    | 3.16 | 5.3%   |
| Impad1    | 43.8916     | 2.89 | 6.6%   |
| Impdh1    | 27.54612    | 1.18 | 4.3%   |
| Impdh2    | 2.435838    | 0.13 | 5.5%   |
| Impg1     | 0           | 0.00 |        |
| Impg2     | 0.11139454  | 0.04 | 32.5%  |
| Importin9 | 8.618276    | 1.10 | 12.8%  |
| Ina       | 129.8978    | 6.86 | 5.3%   |
| Inadl     | 3.477332    | 0.34 | 9.7%   |
| iNAT      | 0           | 0.00 |        |
| Incenp    | 3.872744    | 0.22 | 5.6%   |
| Indo      | 0.04515364  | 0.03 | 71.1%  |
| Indol1    | 0.4049256   | 0.13 | 32.8%  |
| Ing1      | 9.93821     | 0.72 | 7.3%   |
| Ing2      | 3.104576    | 0.24 | 7.7%   |
| Ing3      | 3.84464     | 0.26 | 6.7%   |
| Ing4      | 13.63246    | 0.46 | 3.3%   |
| Ing5      | 3.083712    | 0.12 | 3.8%   |
| Inha      | 14.48132    | 1.24 | 8.6%   |
| Inhba     | 0.3830086   | 0.07 | 18.1%  |
| Inhbb     | 3.042338    | 0.25 | 8.1%   |
| Inhbc     | 0.0097195   | 0.01 | 139.1% |
| Inhbe     | 0.00235254  | 0.01 | 223.6% |

|        |             |       |        |
|--------|-------------|-------|--------|
| Inmt   | 0.04028212  | 0.02  | 44.8%  |
| Inoc1  | 3.547032    | 0.19  | 5.5%   |
| Inpp1  | 10.031336   | 0.51  | 5.1%   |
| Inpp4a | 23.30794    | 1.76  | 7.6%   |
| Inpp4b | 6.298358    | 0.35  | 5.5%   |
| Inpp5a | 12.08288    | 0.26  | 2.2%   |
| Inpp5b | 5.979084    | 0.27  | 4.5%   |
| Inpp5d | 0.02338968  | 0.01  | 50.8%  |
| Inpp5e | 7.65925     | 0.48  | 6.2%   |
| Inpp5f | 283.6812    | 13.17 | 4.6%   |
| Inppl1 | 3.777892    | 0.27  | 7.2%   |
| Ins1   | 0           | 0.00  |        |
| Ins2   | 0           | 0.00  |        |
| Insc   | 0.05623382  | 0.02  | 38.6%  |
| Insig1 | 48.59596    | 2.21  | 4.5%   |
| Insig2 | 21.56258    | 0.97  | 4.5%   |
| Insl3  | 0.8288294   | 0.25  | 30.2%  |
| Insl5  | 0.17882558  | 0.10  | 56.2%  |
| Insl6  | 0.3500988   | 0.12  | 34.7%  |
| Insm1  | 0.6678162   | 0.09  | 13.6%  |
| Insm2  | 0.11460398  | 0.02  | 21.2%  |
| Insr   | 4.647012    | 0.30  | 6.4%   |
| Insr   | 0.001996418 | 0.00  | 137.4% |
| Ints1  | 17.2032     | 0.77  | 4.5%   |
| Ints10 | 15.16468    | 0.48  | 3.2%   |
| Ints12 | 3.408282    | 0.16  | 4.8%   |
| Ints2  | 4.240458    | 0.13  | 3.2%   |
| Ints3  | 17.16564    | 0.35  | 2.0%   |
| Ints4  | 9.134466    | 0.55  | 6.1%   |
| Ints5  | 9.56064     | 0.36  | 3.7%   |
| Ints6  | 4.897584    | 0.34  | 6.9%   |
| Ints7  | 4.36396     | 0.11  | 2.6%   |
| Ints8  | 7.325058    | 1.42  | 19.4%  |
| Ints9  | 3.209808    | 0.15  | 4.8%   |
| Intu   | 0.9734474   | 0.08  | 8.3%   |
| inv    | 0.04363742  | 0.01  | 31.6%  |
| Invs   | 2.325128    | 0.22  | 9.6%   |
| lp6k1  | 25.95338    | 1.55  | 6.0%   |
| lpmk   | 6.338958    | 0.47  | 7.5%   |
| lpo11  | 21.91738    | 1.89  | 8.6%   |
| lpo13  | 11.68212    | 0.91  | 7.8%   |
| lpo4   | 30.51188    | 0.14  | 0.5%   |
| lpo7   | 45.30282    | 1.46  | 3.2%   |
| lpo8   | 6.399346    | 0.42  | 6.5%   |
| lpo9   | 40.1393     | 0.85  | 2.1%   |
| lpp    | 4.044348    | 0.47  | 11.6%  |
| lppk   | 3.98533     | 0.23  | 5.9%   |

|            |            |      |        |
|------------|------------|------|--------|
| IQArfGEF   | 0.6821106  | 0.14 | 21.1%  |
| lqca       | 0.01953498 | 0.01 | 59.6%  |
| lqcb1      | 9.592426   | 0.79 | 8.2%   |
| lqcc       | 1.980452   | 0.18 | 9.2%   |
| lqcd       | 0.375934   | 0.06 | 16.1%  |
| lqce       | 3.485268   | 0.15 | 4.2%   |
| lqcf1      | 0.03278064 | 0.05 | 141.7% |
| lqcf3      | 0          | 0.00 |        |
| lqcf4      | 0          | 0.00 |        |
| lqcf5      | 0.01266544 | 0.03 | 223.6% |
| lqcg       | 1.0848102  | 0.11 | 10.5%  |
| lqch       | 0.04053066 | 0.04 | 90.2%  |
| lqck       | 3.065304   | 1.35 | 44.1%  |
| lqgap1     | 2.541792   | 0.24 | 9.4%   |
| lqgap2     | 0.9910432  | 0.16 | 15.8%  |
| lqgap3     | 0.2450434  | 0.08 | 32.6%  |
| lqsec2     | 17.01102   | 1.22 | 7.2%   |
| lqsec3     | 10.062654  | 1.12 | 11.1%  |
| lqub       | 0.1892544  | 0.05 | 26.8%  |
| lqwd1      | 9.906278   | 0.43 | 4.4%   |
| lrak1      | 3.64065    | 0.26 | 7.1%   |
| lrak1bp1   | 7.10984    | 0.36 | 5.0%   |
| IRAK1-S    | 0.7358252  | 0.25 | 34.4%  |
| lrak2      | 0.3372552  | 0.06 | 16.9%  |
| lrak3      | 0.2260224  | 0.05 | 22.0%  |
| lrak4      | 0.7994016  | 0.09 | 11.5%  |
| ire1_alpha | 0.16844362 | 0.06 | 33.0%  |
| lreb2      | 25.19384   | 1.33 | 5.3%   |
| lrf1       | 0.5274482  | 0.12 | 23.0%  |
| lrf2       | 6.192036   | 0.25 | 4.1%   |
| lrf2bp1    | 18.32206   | 1.33 | 7.3%   |
| lrf3       | 1.648208   | 0.26 | 15.5%  |
| lrf4       | 0.0647794  | 0.01 | 19.7%  |
| lrf5       | 1.90928    | 0.31 | 16.2%  |
| lrf6       | 0.0512171  | 0.05 | 94.0%  |
| lrf7       | 0.05285626 | 0.04 | 73.2%  |
| lrf8       | 0.16181    | 0.05 | 29.0%  |
| lrg1       | 0.04299916 | 0.02 | 50.9%  |
| lrgc1      | 0.00320656 | 0.01 | 223.6% |
| lrgm       | 1.1640124  | 0.26 | 22.0%  |
| lrgq       | 20.0752    | 0.66 | 3.3%   |
| lrs1       | 5.788804   | 0.23 | 4.0%   |
| lrs2       | 8.482756   | 0.63 | 7.5%   |
| lrs3       | 0.0082575  | 0.02 | 223.6% |
| lrs4       | 1.656216   | 0.07 | 4.5%   |
| lrx1       | 2.590404   | 0.20 | 7.6%   |
| lrx2       | 2.908426   | 0.17 | 5.9%   |

|           |            |      |       |
|-----------|------------|------|-------|
| lrx3      | 1.695456   | 0.08 | 4.6%  |
| lrx4      | 0.1927746  | 0.03 | 16.4% |
| lrx5      | 1.0686656  | 0.15 | 14.3% |
| lrx6      | 0.04234056 | 0.03 | 72.8% |
| lsca1     | 28.3722    | 1.34 | 4.7%  |
| lscu      | 14.6301    | 1.40 | 9.5%  |
| lsg12     | 0.02872778 | 0.03 | 92.1% |
| ISG12a    | 0.2359064  | 0.11 | 44.7% |
| lsg15     | 0.08635878 | 0.03 | 35.0% |
| lsg20     | 0.13732768 | 0.09 | 65.7% |
| lsg2011   | 12.51134   | 1.56 | 12.5% |
| lsg2012   | 3.197268   | 0.14 | 4.2%  |
| lsgf3g    | 2.934484   | 0.26 | 8.7%  |
| lsl1      | 0.3544452  | 0.12 | 32.9% |
| isl1-beta | 0.04345392 | 0.03 | 77.0% |
| lsl2      | 0.7230194  | 0.13 | 18.4% |
| lslr      | 9.24777    | 1.83 | 19.8% |
| lslr2     | 0.9259116  | 0.09 | 9.2%  |
| lsoc1     | 32.1505    | 2.22 | 6.9%  |
| lsoc2b    | 1.4465     | 0.26 | 18.3% |
| lsx       | 0.17212622 | 0.07 | 39.2% |
| lsy1      | 8.089688   | 0.60 | 7.4%  |
| lsyna1    | 1.87925    | 0.37 | 19.6% |
| lsynA1    | 0.4317216  | 0.16 | 37.3% |
| ltch      | 10.67393   | 0.84 | 7.8%  |
| ltfg1     | 83.99078   | 2.03 | 2.4%  |
| ltfg2     | 5.519288   | 0.44 | 8.0%  |
| ltfg3     | 5.49711    | 0.36 | 6.6%  |
| ltga1     | 0.9542178  | 0.36 | 37.2% |
| ltga10    | 0.3149314  | 0.06 | 17.8% |
| ltga11    | 0.2195578  | 0.03 | 11.9% |
| ltga2     | 0.04077366 | 0.01 | 36.3% |
| ltga2b    | 0.2641954  | 0.10 | 36.1% |
| ltga3     | 10.850646  | 0.65 | 6.0%  |
| ltga4     | 0.4259728  | 0.18 | 42.1% |
| ltga5     | 1.327192   | 0.15 | 11.1% |
| ltga6     | 2.486978   | 0.16 | 6.5%  |
| ltga7     | 1.0272628  | 0.10 | 9.5%  |
| ltga8     | 0.5242746  | 0.14 | 26.2% |
| ltga9     | 0.7392398  | 0.11 | 14.4% |
| ltgad     | 0.03820642 | 0.01 | 31.7% |
| ltgae     | 0.04035804 | 0.01 | 36.6% |
| ltgal     | 0.01593859 | 0.01 | 56.9% |
| ltgam     | 0.02372866 | 0.01 | 44.9% |
| ltgav     | 3.829466   | 0.36 | 9.3%  |
| ltgax     | 0          | 0.00 |       |
| ltgb1     | 30.35722   | 1.67 | 5.5%  |

|          |             |      |        |
|----------|-------------|------|--------|
| ltgb1bp1 | 10.005866   | 0.92 | 9.2%   |
| ltgb1bp2 | 0.05115822  | 0.04 | 84.8%  |
| ltgb1bp3 | 0.16645444  | 0.07 | 41.6%  |
| ltgb2    | 0.020943696 | 0.01 | 43.0%  |
| ltgb2l   | 0           | 0.00 |        |
| ltgb3    | 0.345552    | 0.09 | 26.2%  |
| ltgb3bp  | 0.8309498   | 0.11 | 13.1%  |
| ltgb4    | 0.874432    | 0.29 | 32.6%  |
| ltgb5    | 3.621062    | 0.27 | 7.5%   |
| ltgb6    | 0.13851674  | 0.08 | 55.0%  |
| ltgb7    | 0.1175656   | 0.04 | 35.6%  |
| ltgb8    | 3.414712    | 0.20 | 5.8%   |
| ltgb1l   | 0.4910754   | 0.11 | 22.9%  |
| ltih1    | 0           | 0.00 |        |
| ltih2    | 0.0409581   | 0.02 | 49.0%  |
| ltih3    | 0.10028402  | 0.02 | 20.4%  |
| ltih4    | 0.009962254 | 0.01 | 60.6%  |
| ltih5    | 0.6094396   | 0.16 | 26.9%  |
| ltk      | 0.282493    | 0.06 | 21.3%  |
| ltln1    | 0.00595998  | 0.01 | 223.6% |
| ltm2a    | 33.36792    | 5.87 | 17.6%  |
| ltm2b    | 154.2624    | 4.53 | 2.9%   |
| ltm2c    | 86.25926    | 4.79 | 5.6%   |
| ltpa     | 10.638484   | 0.81 | 7.6%   |
| ltpk1    | 10.76682    | 0.51 | 4.8%   |
| ltpka    | 1.1548142   | 0.17 | 14.6%  |
| ltpkb    | 3.119272    | 0.47 | 15.2%  |
| ltpkc    | 2.560042    | 0.20 | 7.7%   |
| ltpr1    | 1.809106    | 0.32 | 17.9%  |
| ltpr2    | 0.3443196   | 0.06 | 18.8%  |
| ltpr3    | 0.313276    | 0.04 | 12.0%  |
| ltsn     | 1.8846556   | 1.90 | 100.6% |
| ltsn1    | 14.3344     | 0.97 | 6.8%   |
| ltsn2    | 9.035954    | 0.71 | 7.9%   |
| lvd      | 12.66026    | 0.85 | 6.7%   |
| lvl      | 0.00612951  | 0.01 | 94.2%  |
| lvns1abp | 32.71346    | 2.39 | 7.3%   |
| lws1     | 5.209778    | 0.45 | 8.6%   |
| lyd      | 0.0780406   | 0.05 | 60.6%  |
| lzumo1   | 0.00836568  | 0.01 | 137.0% |
| J00476   | 0           | 0.00 |        |
| Jag1     | 1.507818    | 0.08 | 5.2%   |
| Jag2     | 6.67403     | 0.30 | 4.5%   |
| Jagn1    | 28.02816    | 1.31 | 4.7%   |
| Jak1     | 34.04226    | 1.40 | 4.1%   |
| Jak2     | 8.41986     | 0.32 | 3.9%   |
| Jak3     | 2.451762    | 0.53 | 21.5%  |

|             |             |      |        |
|-------------|-------------|------|--------|
| Jakmip1     | 15.30174    | 1.33 | 8.7%   |
| Jam2        | 5.34416     | 0.62 | 11.5%  |
| Jam3        | 4.029138    | 0.30 | 7.5%   |
| Jarid1a     | 8.254486    | 0.85 | 10.3%  |
| Jarid1b     | 13.21702    | 0.18 | 1.4%   |
| Jarid1c     | 8.51319     | 0.47 | 5.6%   |
| Jarid1d     | 0.001501706 | 0.00 | 223.6% |
| Jarid2      | 9.752652    | 0.44 | 4.5%   |
| Jazf1       | 25.45996    | 3.32 | 13.0%  |
| Jbp1        | 0.5326082   | 0.27 | 51.0%  |
| Jemm2       | 1.3477084   | 0.47 | 35.2%  |
| Jhdm1d      | 1.716302    | 0.39 | 22.5%  |
| Jmjd1a      | 6.625554    | 0.90 | 13.5%  |
| Jmjd1b      | 6.631612    | 0.24 | 3.6%   |
| Jmjd1c      | 5.496976    | 0.31 | 5.6%   |
| Jmjd2a      | 12.06982    | 0.33 | 2.7%   |
| Jmjd2b      | 15.13968    | 0.62 | 4.1%   |
| Jmjd2c      | 4.271086    | 0.31 | 7.2%   |
| Jmjd2d      | 0.7762688   | 0.08 | 9.7%   |
| Jmjd3       | 4.925884    | 0.34 | 6.9%   |
| Jmjd4       | 9.584726    | 0.64 | 6.7%   |
| Jmjd5       | 0.8728996   | 0.13 | 15.4%  |
| Jmjd6       | 6.000408    | 0.51 | 8.5%   |
| Jmy         | 7.815668    | 0.77 | 9.8%   |
| Jmy-pending | 0.8277894   | 0.46 | 56.1%  |
| jnk1        | 1.899742    | 0.60 | 31.4%  |
| Jnk2        | 1.341798    | 0.23 | 17.4%  |
| Josd1       | 17.57358    | 0.41 | 2.3%   |
| Josd2       | 4.00509     | 0.37 | 9.3%   |
| Josd3       | 5.909332    | 2.91 | 49.3%  |
| Jph1        | 0.384514    | 0.03 | 6.6%   |
| Jph2        | 0.02444291  | 0.01 | 46.4%  |
| Jph3        | 29.9432     | 2.32 | 7.7%   |
| Jph4        | 23.5493     | 0.93 | 3.9%   |
| JRAB        | 0.40269568  | 0.23 | 56.3%  |
| Jrk         | 4.279026    | 0.24 | 5.7%   |
| Jsap1       | 0.16867838  | 0.12 | 73.6%  |
| JSAP2       | 0.0490314   | 0.04 | 78.0%  |
| Jsrp1       | 0.03482744  | 0.04 | 106.0% |
| Jtb         | 12.12944    | 1.41 | 11.6%  |
| Jtv1        | 14.6183     | 1.67 | 11.5%  |
| Jub         | 0.758565    | 0.14 | 18.6%  |
| Jun         | 17.68928    | 1.39 | 7.9%   |
| Junb        | 1.517068    | 0.24 | 15.8%  |
| Jund1       | 33.28984    | 1.88 | 5.7%   |
| Jundm2      | 8.3553      | 0.32 | 3.8%   |
| Jup         | 7.234868    | 0.61 | 8.5%   |

|               |            |      |        |
|---------------|------------|------|--------|
| K230010J24Rik | 0.262064   | 0.07 | 28.3%  |
| Kalrn         | 2.067892   | 0.32 | 15.4%  |
| Kap           | 0          | 0.00 |        |
| Kars          | 33.56846   | 3.13 | 9.3%   |
| Katna1        | 2.305644   | 0.23 | 9.9%   |
| Katnal1       | 13.36616   | 0.96 | 7.2%   |
| Katnal2       | 0.969343   | 0.16 | 16.2%  |
| Katnb1        | 9.87266    | 0.43 | 4.3%   |
| Kazald1       | 3.425138   | 0.26 | 7.7%   |
| Kbtbd10       | 0.02849234 | 0.02 | 75.7%  |
| Kbtbd11       | 6.539234   | 0.28 | 4.3%   |
| Kbtbd2        | 17.19744   | 1.10 | 6.4%   |
| Kbtbd3        | 5.027936   | 0.26 | 5.2%   |
| Kbtbd4        | 9.561844   | 0.52 | 5.4%   |
| Kbtbd5        | 0.07917878 | 0.06 | 75.9%  |
| Kbtbd7        | 10.036488  | 0.18 | 1.8%   |
| Kbtbd8        | 0.8596908  | 0.08 | 9.1%   |
| Kcc4          | 0.05104884 | 0.02 | 30.1%  |
| Kcmf1         | 21.61346   | 1.03 | 4.8%   |
| Kcna1         | 12.545514  | 1.64 | 13.1%  |
| Kcna10        | 0.0070923  | 0.01 | 140.8% |
| Kcna2         | 11.830216  | 2.12 | 17.9%  |
| Kcna3         | 3.742328   | 0.27 | 7.2%   |
| Kcna4         | 3.978652   | 0.36 | 9.1%   |
| Kcna5         | 0.1798156  | 0.05 | 25.6%  |
| Kcna6         | 17.83032   | 1.09 | 6.1%   |
| Kcna7         | 0.06758354 | 0.02 | 36.0%  |
| Kcnab1        | 3.572846   | 0.50 | 14.1%  |
| Kcnab2        | 45.5189    | 6.16 | 13.5%  |
| Kcnab3        | 1.746928   | 0.32 | 18.5%  |
| Kcnb1         | 4.940092   | 0.33 | 6.7%   |
| Kcnb2         | 1.984998   | 0.21 | 10.7%  |
| Kcnc1         | 27.47524   | 1.97 | 7.2%   |
| Kcnc2         | 7.451352   | 0.92 | 12.3%  |
| Kcnc3         | 16.22718   | 1.57 | 9.7%   |
| Kcnc4         | 14.66868   | 0.60 | 4.1%   |
| Kcnd1         | 4.461486   | 0.24 | 5.3%   |
| Kcnd2         | 24.68834   | 0.48 | 1.9%   |
| Kcnd3         | 7.408916   | 0.40 | 5.4%   |
| Kcne1         | 0          | 0.00 |        |
| Kcne1l        | 0.08149988 | 0.02 | 24.8%  |
| Kcne2         | 0.12873106 | 0.05 | 40.9%  |
| Kcne3         | 0.08300642 | 0.05 | 55.6%  |
| Kcne4         | 0.3513024  | 0.12 | 33.2%  |
| Kcnf1         | 0.6274388  | 0.06 | 9.2%   |
| Kcng1         | 0.1602316  | 0.05 | 30.2%  |
| Kcng3         | 0.280286   | 0.05 | 19.5%  |



|        |             |       |        |
|--------|-------------|-------|--------|
| Kcng4  | 0.12132412  | 0.04  | 34.8%  |
| Kcnh1  | 2.722196    | 0.12  | 4.3%   |
| Kcnh2  | 20.17306    | 0.54  | 2.7%   |
| Kcnh3  | 0.1767532   | 0.03  | 15.9%  |
| Kcnh5  | 3.861928    | 0.82  | 21.1%  |
| Kcnh6  | 1.616294    | 0.10  | 6.1%   |
| Kcnh7  | 2.808316    | 0.41  | 14.7%  |
| Kcnh8  | 1.0600552   | 0.23  | 21.6%  |
| Kcnip1 | 36.00776    | 3.96  | 11.0%  |
| Kcnip2 | 0.9029922   | 0.25  | 27.2%  |
| Kcnip3 | 1.1927296   | 0.27  | 22.7%  |
| Kcnip4 | 11.9422     | 0.89  | 7.4%   |
| Kcnj1  | 0.009047    | 0.01  | 161.5% |
| Kcnj10 | 3.616434    | 0.31  | 8.7%   |
| Kcnj11 | 2.991248    | 0.18  | 6.0%   |
| Kcnj12 | 1.911308    | 0.19  | 10.1%  |
| Kcnj14 | 0.1749056   | 0.02  | 11.7%  |
| Kcnj15 | 0.025545572 | 0.02  | 60.5%  |
| Kcnj16 | 0.152501    | 0.01  | 6.7%   |
| Kcnj2  | 1.0451322   | 0.17  | 16.2%  |
| Kcnj3  | 9.080082    | 0.08  | 0.9%   |
| Kcnj4  | 0.1825862   | 0.01  | 2.7%   |
| Kcnj5  | 0.012944338 | 0.02  | 125.8% |
| Kcnj6  | 1.814066    | 0.31  | 17.1%  |
| Kcnj8  | 0.5837396   | 0.08  | 14.1%  |
| Kcnj9  | 1.081008    | 0.04  | 3.6%   |
| Kcnk1  | 17.281      | 0.41  | 2.3%   |
| Kcnk10 | 3.595186    | 0.45  | 12.4%  |
| Kcnk12 | 2.099354    | 0.25  | 11.8%  |
| Kcnk13 | 0.10924222  | 0.03  | 24.2%  |
| Kcnk15 | 0.006418    | 0.01  | 223.6% |
| Kcnk18 | 0           | 0.00  |        |
| Kcnk2  | 9.865842    | 0.31  | 3.1%   |
| Kcnk3  | 10.190226   | 0.65  | 6.3%   |
| Kcnk4  | 3.51152     | 0.19  | 5.5%   |
| Kcnk5  | 0.1704828   | 0.03  | 20.1%  |
| Kcnk6  | 0.2294656   | 0.08  | 34.7%  |
| Kcnk7  | 0.00987944  | 0.02  | 223.6% |
| Kcnk9  | 226.8928    | 15.66 | 6.9%   |
| Kcnma1 | 10.95116    | 1.17  | 10.7%  |
| Kcnmb1 | 0           | 0.00  |        |
| Kcnmb2 | 2.018262    | 0.28  | 14.0%  |
| Kcnmb4 | 5.790204    | 1.18  | 20.3%  |
| Kcnn1  | 6.648372    | 1.43  | 21.5%  |
| Kcnn2  | 7.401362    | 0.62  | 8.4%   |
| Kcnn3  | 1.433814    | 0.17  | 11.8%  |
| Kcnn4  | 0.00528758  | 0.01  | 137.1% |

|         |             |      |       |
|---------|-------------|------|-------|
| Kcnq1   | 0.08214246  | 0.03 | 35.4% |
| Kcnq2   | 36.70036    | 4.08 | 11.1% |
| Kcnq3   | 12.20046    | 0.72 | 5.9%  |
| Kcnq4   | 0.4210534   | 0.02 | 5.6%  |
| Kcnq5   | 4.864382    | 0.30 | 6.2%  |
| Kcnrg   | 0.387775    | 0.10 | 27.0% |
| Kcns1   | 0.218773    | 0.06 | 29.0% |
| Kcns2   | 4.31547     | 0.25 | 5.8%  |
| Kcns3   | 4.956708    | 0.22 | 4.4%  |
| Kcnt1   | 5.095954    | 0.41 | 8.1%  |
| Kcnt2   | 2.822154    | 0.30 | 10.6% |
| Kcnu1   | 0.06056174  | 0.04 | 62.8% |
| Kcnv1   | 1.0414226   | 0.15 | 14.8% |
| Kcnv2   | 0.02695174  | 0.01 | 26.2% |
| Kcp     | 0.06195212  | 0.02 | 33.5% |
| Kctd1   | 11.3031     | 1.02 | 9.0%  |
| Kctd10  | 6.980386    | 0.43 | 6.2%  |
| Kctd11  | 0.2272856   | 0.08 | 36.0% |
| Kctd12  | 18.21504    | 1.05 | 5.8%  |
| Kctd12b | 0.3315888   | 0.07 | 22.0% |
| Kctd13  | 27.57154    | 1.70 | 6.2%  |
| Kctd14  | 0.03244672  | 0.02 | 67.1% |
| Kctd15  | 6.21877     | 0.62 | 9.9%  |
| Kctd16  | 2.011994    | 0.26 | 12.7% |
| Kctd17  | 39.95754    | 2.50 | 6.3%  |
| Kctd18  | 7.942172    | 0.47 | 6.0%  |
| Kctd19  | 0.372594052 | 0.34 | 91.4% |
| Kctd2   | 15.76766    | 0.34 | 2.1%  |
| Kctd20  | 18.73472    | 0.73 | 3.9%  |
| Kctd21  | 4.283554    | 0.39 | 9.0%  |
| Kctd3   | 17.78632    | 0.77 | 4.3%  |
| Kctd4   | 0.3172642   | 0.02 | 7.3%  |
| Kctd5   | 7.766682    | 0.76 | 9.8%  |
| Kctd6   | 12.13702    | 0.62 | 5.1%  |
| Kctd7   | 7.142344    | 0.26 | 3.6%  |
| Kctd8   | 8.61007     | 0.55 | 6.3%  |
| Kctd9   | 6.151976    | 0.79 | 12.8% |
| Kdelc1  | 4.68413     | 0.32 | 6.9%  |
| Kdelc2  | 4.246206    | 0.50 | 11.8% |
| Kdelr1  | 31.18268    | 2.60 | 8.3%  |
| Kdelr2  | 24.70266    | 2.08 | 8.4%  |
| Kdelr3  | 3.440498    | 0.88 | 25.6% |
| Kdr     | 0.1808346   | 0.03 | 15.5% |
| Keap1   | 15.97076    | 0.63 | 3.9%  |
| Keg1    | 0           | 0.00 |       |
| Kel     | 0           | 0.00 |       |
| Kepi    | 5.069998    | 0.52 | 10.3% |

|                  |             |      |        |
|------------------|-------------|------|--------|
| Kera             | 0.02501768  | 0.02 | 77.7%  |
| Khdrbs1          | 34.9804     | 0.77 | 2.2%   |
| Khdrbs2          | 4.673964    | 0.24 | 5.2%   |
| Khdrbs3          | 24.57548    | 1.25 | 5.1%   |
| Khk              | 4.643884    | 0.64 | 13.7%  |
| Khsrp            | 15.71106    | 0.76 | 4.9%   |
| Ki-67            | 0.5939992   | 0.10 | 16.1%  |
| Kiaa0028         | 0.05123798  | 0.02 | 45.9%  |
| KIAA0143         | 1.7410036   | 1.15 | 66.1%  |
| Kiaa0146         | 0.018013476 | 0.01 | 28.5%  |
| KIAA0150         | 0.2209396   | 0.10 | 45.0%  |
| Kiaa0196         | 1.2077554   | 0.60 | 49.6%  |
| Kiaa0240         | 8.742606    | 0.46 | 5.3%   |
| Kiaa0241         | 15.03434    | 1.07 | 7.1%   |
| Kiaa0286         | 0.4426768   | 0.09 | 20.9%  |
| Kiaa0528         | 11.7251     | 0.39 | 3.3%   |
| Kiaa0575         | 0.05162312  | 0.02 | 33.6%  |
| Kiaa0819         | 4.73022     | 0.23 | 4.9%   |
| Kiaa0841         | 0.5934064   | 0.20 | 34.2%  |
| Kiaa0859         | 0.2729078   | 0.04 | 13.6%  |
| Kiaa1152         | 2.271492    | 0.57 | 25.0%  |
| KIAA1199_homolog | 1.0086402   | 0.14 | 13.4%  |
| Kiaa1279         | 0.17713646  | 0.15 | 86.5%  |
| kiaa1322         | 0.1991207   | 0.25 | 127.0% |
| KIAA1440         | 3.650382    | 0.43 | 11.7%  |
| KIAA1447         | 0.481556    | 0.24 | 50.6%  |
| KIAA1768         | 6.654432    | 0.34 | 5.0%   |
| Kiaa1815         | 0.03095024  | 0.01 | 19.8%  |
| Kiaa2022         | 3.535542    | 0.41 | 11.5%  |
| KIAA312          | 17.1679     | 2.71 | 15.8%  |
| Kif11            | 1.028333    | 0.22 | 21.3%  |
| Kif12            | 0.00212848  | 0.00 | 223.6% |
| Kif13a           | 7.420732    | 0.99 | 13.4%  |
| Kif13b           | 1.2117638   | 0.21 | 17.2%  |
| Kif14            | 0.11387142  | 0.02 | 17.4%  |
| Kif15            | 0.3934174   | 0.11 | 27.1%  |
| Kif16b           | 1.93316     | 0.14 | 7.3%   |
| Kif17            | 1.396758    | 0.20 | 14.3%  |
| Kif18a           | 0.5106644   | 0.08 | 16.6%  |
| Kif19a           | 0.03117534  | 0.03 | 87.7%  |
| Kif1a            | 174.5324    | 8.91 | 5.1%   |
| Kif1b            | 92.71732    | 2.98 | 3.2%   |
| KIF1B            | 0.12209564  | 0.10 | 85.3%  |
| Kif1c            | 5.189464    | 0.51 | 9.8%   |
| Kif20a           | 1.0052684   | 0.17 | 16.7%  |
| Kif21a           | 64.26992    | 5.03 | 7.8%   |
| Kif21b           | 18.49774    | 1.79 | 9.7%   |

|         |             |      |        |
|---------|-------------|------|--------|
| Kif22   | 1.0894346   | 0.20 | 18.2%  |
| Kif23   | 0.8411866   | 0.24 | 28.4%  |
| Kif24   | 0.5757348   | 0.10 | 17.8%  |
| Kif26a  | 0.2799016   | 0.03 | 10.9%  |
| Kif26b  | 4.558762    | 0.66 | 14.6%  |
| Kif27   | 0.2133864   | 0.02 | 11.1%  |
| Kif2a   | 37.93378    | 2.28 | 6.0%   |
| Kif2b   | 0           | 0.00 |        |
| Kif2c   | 0.4847796   | 0.10 | 20.8%  |
| Kif3a   | 60.60896    | 2.79 | 4.6%   |
| Kif3b   | 21.1099     | 0.89 | 4.2%   |
| Kif3c   | 51.02318    | 1.90 | 3.7%   |
| Kif4    | 0.4921322   | 0.09 | 19.1%  |
| Kif5a   | 183.1146    | 6.30 | 3.4%   |
| Kif5b   | 34.92734    | 3.30 | 9.5%   |
| Kif5c   | 139.303     | 2.13 | 1.5%   |
| Kif6    | 0.3715408   | 0.08 | 22.4%  |
| Kif7    | 0.3264878   | 0.19 | 58.0%  |
| Kif9    | 1.17662     | 0.08 | 6.8%   |
| Kifap3  | 89.57536    | 2.03 | 2.3%   |
| Kifc1   | 1.034661    | 0.11 | 10.5%  |
| Kifc2   | 85.54218    | 3.47 | 4.1%   |
| Kifc3   | 9.113986    | 0.18 | 1.9%   |
| Kin     | 4.04207     | 0.13 | 3.2%   |
| Kir3dl1 | 0           | 0.00 |        |
| Kir3dl2 | 0           | 0.00 |        |
| Kirrel  | 2.29883     | 0.29 | 12.7%  |
| Kirrel2 | 0.02779162  | 0.01 | 28.7%  |
| Kirrel3 | 7.9968      | 0.58 | 7.3%   |
| Kiss1   | 0.013717012 | 0.02 | 157.3% |
| Kiss1r  | 3.205934    | 0.27 | 8.3%   |
| Kit     | 7.293434    | 0.63 | 8.6%   |
| Kitl    | 7.595762    | 0.25 | 3.3%   |
| Kl      | 0.2987484   | 0.04 | 12.3%  |
| Klb     | 0.2098514   | 0.05 | 24.7%  |
| Klc1    | 192.1526    | 4.21 | 2.2%   |
| Klc2    | 91.82156    | 3.97 | 4.3%   |
| Klc3    | 0.9189312   | 0.79 | 85.8%  |
| Klc4    | 5.53865     | 0.47 | 8.5%   |
| Klf1    | 0.0322416   | 0.01 | 44.4%  |
| Klf10   | 3.740078    | 0.38 | 10.1%  |
| Klf11   | 1.686364    | 0.12 | 7.2%   |
| Klf12   | 8.753742    | 0.85 | 9.7%   |
| Klf13   | 3.253346    | 0.61 | 18.7%  |
| Klf15   | 4.744664    | 0.46 | 9.6%   |
| Klf16   | 5.75846     | 0.54 | 9.5%   |
| Klf17   | 0.00223384  | 0.00 | 223.6% |

|         |            |      |        |
|---------|------------|------|--------|
| Klf2    | 0.3730396  | 0.07 | 18.5%  |
| Klf3    | 2.40656    | 0.36 | 15.1%  |
| Klf4    | 1.1875724  | 0.28 | 23.3%  |
| Klf5    | 1.481256   | 0.30 | 20.5%  |
| Klf6    | 13.67214   | 1.06 | 7.8%   |
| Klf7    | 4.778962   | 0.50 | 10.5%  |
| Klf8    | 2.403168   | 0.38 | 15.9%  |
| Klf9    | 7.813132   | 0.95 | 12.1%  |
| Klhdc1  | 3.496246   | 0.26 | 7.4%   |
| Klhdc2  | 68.08024   | 1.29 | 1.9%   |
| Klhdc3  | 53.0642    | 1.97 | 3.7%   |
| Klhdc4  | 5.758312   | 0.66 | 11.5%  |
| Klhdc5  | 4.404336   | 0.17 | 3.9%   |
| Klhdc6  | 0.03848932 | 0.02 | 55.4%  |
| Klhdc7a | 0.10135066 | 0.04 | 36.7%  |
| Klhdc8a | 2.345008   | 0.21 | 9.1%   |
| Klhdc8b | 3.215522   | 0.25 | 7.9%   |
| Klhdc9  | 2.789928   | 0.39 | 14.1%  |
| Klhl1   | 2.87199    | 0.18 | 6.1%   |
| Klhl10  | 0.2000646  | 0.05 | 27.1%  |
| Klhl11  | 17.50612   | 2.64 | 15.1%  |
| Klhl12  | 12.54748   | 0.52 | 4.2%   |
| Klhl13  | 43.68132   | 0.51 | 1.2%   |
| Klhl14  | 2.025304   | 0.13 | 6.6%   |
| Klhl15  | 3.722334   | 0.31 | 8.3%   |
| Klhl17  | 8.55488    | 0.88 | 10.3%  |
| Klhl18  | 6.41386    | 0.46 | 7.2%   |
| Klhl2   | 16.34062   | 0.98 | 6.0%   |
| Klhl20  | 8.785146   | 0.28 | 3.2%   |
| Klhl21  | 2.55121    | 0.27 | 10.6%  |
| Klhl22  | 31.59      | 0.78 | 2.5%   |
| Klhl23  | 15.48746   | 1.18 | 7.6%   |
| Klhl24  | 12.25588   | 1.22 | 10.0%  |
| Klhl25  | 4.116776   | 0.16 | 4.0%   |
| Klhl26  | 14.78654   | 1.01 | 6.8%   |
| Klhl28  | 5.939856   | 0.67 | 11.3%  |
| Klhl30  | 0.00442927 | 0.01 | 138.9% |
| Klhl31  | 0.0032858  | 0.01 | 223.6% |
| Klhl32  | 7.513978   | 0.43 | 5.7%   |
| Klhl34  | 2.55015    | 0.33 | 13.0%  |
| Klhl4   | 0.8850156  | 0.09 | 10.4%  |
| Klhl5   | 7.511552   | 0.80 | 10.6%  |
| Klhl6   | 0.0695557  | 0.03 | 46.7%  |
| Klhl7   | 41.29336   | 1.31 | 3.2%   |
| Klhl8   | 7.426984   | 0.31 | 4.2%   |
| Klhl9   | 27.33622   | 0.86 | 3.2%   |
| Klk1    | 0.00623552 | 0.01 | 223.6% |

|         |             |      |        |
|---------|-------------|------|--------|
| Klk10   | 0           | 0.00 |        |
| Klk11   | 0           | 0.00 |        |
| Klk12   | 0           | 0.00 |        |
| Klk13   | 0           | 0.00 |        |
| Klk14   | 0           | 0.00 |        |
| Klk15   | 0           | 0.00 |        |
| Klk1b1  | 0           | 0.00 |        |
| Klk1b11 | 0           | 0.00 |        |
| Klk1b16 | 0           | 0.00 |        |
| Klk1b21 | 0           | 0.00 |        |
| Klk1b22 | 0           | 0.00 |        |
| Klk1b24 | 0.02822674  | 0.03 | 102.7% |
| Klk1b27 | 0           | 0.00 |        |
| Klk1b3  | 0           | 0.00 |        |
| Klk1b4  | 0.00640892  | 0.01 | 223.6% |
| Klk1b5  | 0           | 0.00 |        |
| Klk1b8  | 0           | 0.00 |        |
| Klk1b9  | 0           | 0.00 |        |
| Klk4    | 0           | 0.00 |        |
| Klk5    | 0           | 0.00 |        |
| Klk6    | 0           | 0.00 |        |
| Klk7    | 0.016412    | 0.02 | 111.4% |
| Klk8    | 0.10811292  | 0.03 | 27.9%  |
| Klk9    | 0.0193306   | 0.02 | 103.1% |
| Klkb1   | 0.01417624  | 0.00 | 19.5%  |
| Klra1   | 0           | 0.00 |        |
| Klra10  | 0.00906926  | 0.02 | 223.6% |
| Klra12  | 0           | 0.00 |        |
| Klra13  | 0           | 0.00 |        |
| Klra15  | 0           | 0.00 |        |
| Klra17  | 0           | 0.00 |        |
| Klra18  | 0           | 0.00 |        |
| Klra19  | 0           | 0.00 |        |
| Klra2   | 0.00863908  | 0.01 | 137.3% |
| Klra21  | 0.00110657  | 0.00 | 223.6% |
| Klra22  | 0           | 0.00 |        |
| Klra23  | 0           | 0.00 |        |
| Klra29  | 0           | 0.00 |        |
| Klra3   | 0           | 0.00 |        |
| Klra4   | 0           | 0.00 |        |
| Klra5   | 0           | 0.00 |        |
| Klra6   | 0           | 0.00 |        |
| Klra7   | 0.00640822  | 0.01 | 223.6% |
| Klra8   | 0.00644722  | 0.01 | 223.6% |
| Klra9   | 0           | 0.00 |        |
| Klrb1a  | 0.01397518  | 0.02 | 137.0% |
| Klrb1b  | 0.002102882 | 0.00 | 91.8%  |

|         |             |      |        |
|---------|-------------|------|--------|
| Klrb1c  | 0.006302356 | 0.01 | 91.7%  |
| Klrb1d  | 0.00424336  | 0.01 | 223.6% |
| Klrb1f  | 0           | 0.00 |        |
| Klrb6   | 0.02652342  | 0.03 | 94.8%  |
| Klrc1   | 0           | 0.00 |        |
| Klrc2   | 0           | 0.00 |        |
| Klrc3   | 0           | 0.00 |        |
| Klrd1   | 0           | 0.00 |        |
| Klre1   | 0           | 0.00 |        |
| Klrg1   | 0.12564022  | 0.09 | 71.6%  |
| Klrg2   | 0.0606913   | 0.03 | 42.2%  |
| Klri1   | 0.0462371   | 0.03 | 68.6%  |
| Klri2   | 0           | 0.00 |        |
| Klrk1   | 0           | 0.00 |        |
| Kmo     | 0.00924876  | 0.01 | 137.0% |
| Kncn    | 0.03602154  | 0.01 | 25.5%  |
| Kndc1   | 8.927734    | 0.77 | 8.6%   |
| Kng1    | 0.0128574   | 0.01 | 58.4%  |
| Kng2    | 0.05935106  | 0.03 | 47.6%  |
| KNT     | 0.8912616   | 0.45 | 50.7%  |
| Kntc1   | 0.1857108   | 0.06 | 30.7%  |
| Kor3    | 16.60092    | 2.11 | 12.7%  |
| Kox-1   | 0.08894858  | 0.02 | 19.0%  |
| Kpc1    | 7.734512    | 1.13 | 14.7%  |
| Kpna1   | 29.69014    | 2.55 | 8.6%   |
| Kpna2   | 0.07173378  | 0.04 | 49.2%  |
| Kpna3   | 25.42888    | 1.41 | 5.5%   |
| Kpna4   | 24.44464    | 1.75 | 7.1%   |
| Kpna6   | 20.24722    | 0.42 | 2.1%   |
| Kpnb1   | 34.95314    | 1.07 | 3.0%   |
| Kprp    | 0           | 0.00 |        |
| Kptn    | 7.42575     | 0.75 | 10.1%  |
| Kras    | 24.3289     | 0.60 | 2.4%   |
| KRAZ1   | 0.828784    | 0.16 | 19.8%  |
| Krba1   | 7.11029     | 0.36 | 5.0%   |
| Krc     | 3.019082    | 0.77 | 25.5%  |
| Krcc1   | 3.953246    | 0.35 | 8.9%   |
| Kremen1 | 1.091241    | 0.10 | 8.9%   |
| Kremen2 | 0.09612176  | 0.04 | 41.6%  |
| Kri1    | 6.4223      | 0.73 | 11.4%  |
| Krit1   | 7.208686    | 0.35 | 4.9%   |
| Krr1    | 8.22269     | 0.32 | 3.9%   |
| Krt1    | 2.06888     | 0.20 | 9.6%   |
| Krt10   | 1.726064    | 0.24 | 13.6%  |
| Krt13   | 0.00331638  | 0.01 | 223.6% |
| Krt14   | 0.00829518  | 0.01 | 137.0% |
| Krt15   | 0           | 0.00 |        |

|           |             |      |        |
|-----------|-------------|------|--------|
| Krt16     | 0           | 0.00 |        |
| Krt17     | 0           | 0.00 |        |
| Krt18     | 1.694172    | 0.40 | 23.4%  |
| Krt19     | 0.7227396   | 0.19 | 25.7%  |
| Krt2      | 0.00259062  | 0.01 | 223.6% |
| Krt20     | 0.02054728  | 0.02 | 94.9%  |
| Krt222    | 7.17776     | 0.49 | 6.9%   |
| Krt23     | 0.02372096  | 0.03 | 109.7% |
| Krt24     | 0.00306812  | 0.01 | 223.6% |
| Krt25     | 0.00352858  | 0.01 | 223.6% |
| Krt26     | 0.001945428 | 0.00 | 223.6% |
| Krt27     | 0           | 0.00 |        |
| Krt28     | 0.00527294  | 0.01 | 137.4% |
| Krt31     | 0           | 0.00 |        |
| Krt32     | 0.00274536  | 0.01 | 223.6% |
| Krt33a    | 0           | 0.00 |        |
| Krt33b    | 0.00459664  | 0.01 | 223.6% |
| Krt34     | 0           | 0.00 |        |
| Krt35     | 0           | 0.00 |        |
| Krt36     | 0.00218316  | 0.00 | 223.6% |
| Krt39     | 0           | 0.00 |        |
| Krt4      | 0           | 0.00 |        |
| Krt40     | 0.0080006   | 0.01 | 138.8% |
| Krt42     | 0.00841922  | 0.01 | 138.1% |
| Krt5      | 0.00221286  | 0.00 | 223.6% |
| Krt6a     | 0           | 0.00 |        |
| Krt6b     | 0           | 0.00 |        |
| Krt7      | 0.13236324  | 0.06 | 47.4%  |
| Krt71     | 0.0022035   | 0.00 | 223.6% |
| Krt72     | 0           | 0.00 |        |
| Krt73     | 0.0143008   | 0.01 | 98.4%  |
| Krt74     | 0           | 0.00 |        |
| Krt75     | 0.001701642 | 0.00 | 223.6% |
| Krt76     | 0.0027689   | 0.01 | 223.6% |
| Krt77     | 0.00641226  | 0.01 | 141.6% |
| Krt78     | 0.014788416 | 0.01 | 74.9%  |
| Krt79     | 0           | 0.00 |        |
| Krt8      | 0.9978964   | 0.29 | 28.9%  |
| Krt80     | 0.00701367  | 0.01 | 161.9% |
| Krt81     | 0           | 0.00 |        |
| Krt82     | 0           | 0.00 |        |
| Krt83     | 0           | 0.00 |        |
| Krt84     | 0           | 0.00 |        |
| Krt86     | 0           | 0.00 |        |
| Krt9      | 0.003686832 | 0.01 | 137.7% |
| Krtap12-1 | 0           | 0.00 |        |
| Krtap13   | 0           | 0.00 |        |



|           |             |      |        |
|-----------|-------------|------|--------|
| Krtap13-1 | 0           | 0.00 |        |
| Krtap14   | 0           | 0.00 |        |
| Krtap15   | 0           | 0.00 |        |
| Krtap16.6 | 0           | 0.00 |        |
| Krtap16-1 | 0           | 0.00 |        |
| Krtap16-4 | 0           | 0.00 |        |
| Krtap16-5 | 0           | 0.00 |        |
| Krtap16-7 | 0           | 0.00 |        |
| Krtap16-9 | 0           | 0.00 |        |
| Krtap17-1 | 0           | 0.00 |        |
| Krtap3-1  | 0           | 0.00 |        |
| Krtap3-2  | 0           | 0.00 |        |
| Krtap3-3  | 0           | 0.00 |        |
| Krtap4-7  | 0           | 0.00 |        |
| Krtap5-1  | 0.00847208  | 0.02 | 223.6% |
| Krtap5-2  | 0.00747558  | 0.02 | 223.6% |
| Krtap5-4  | 0           | 0.00 |        |
| Krtap5-5  | 0.00492062  | 0.01 | 223.6% |
| Krtap6-1  | 0           | 0.00 |        |
| Krtap6-2  | 0           | 0.00 |        |
| Krtap8-2  | 0           | 0.00 |        |
| Krtap9-1  | 0           | 0.00 |        |
| Krtcap2   | 39.77806    | 3.07 | 7.7%   |
| Krtcap3   | 0.4026766   | 0.12 | 30.0%  |
| Krtdap    | 0           | 0.00 |        |
| Ksr1      | 3.886468    | 0.41 | 10.5%  |
| Ksr2      | 7.630696    | 1.11 | 14.5%  |
| Ktelc1    | 13.06116    | 0.89 | 6.9%   |
| Kti12     | 4.453474    | 0.46 | 10.3%  |
| Ktn1      | 11.776482   | 3.66 | 31.1%  |
| Ky        | 0.4330818   | 0.05 | 11.2%  |
| Kynu      | 0.05526426  | 0.04 | 71.9%  |
| L1cam     | 58.55146    | 1.17 | 2.0%   |
| L1td1     | 0.013795034 | 0.01 | 69.4%  |
| L2hgdh    | 2.841162    | 0.19 | 6.8%   |
| L3mbtl    | 4.909182    | 0.15 | 3.0%   |
| L3mbtl2   | 10.93948    | 0.77 | 7.0%   |
| L3mbtl3   | 7.131216    | 0.31 | 4.4%   |
| L3mbtl4   | 0.3956998   | 0.09 | 22.6%  |
| l7Rn6     | 16.36404    | 0.53 | 3.2%   |
| Lace1     | 5.645796    | 0.29 | 5.1%   |
| Lactb     | 2.712764    | 0.26 | 9.6%   |
| Lactb2    | 3.519182    | 0.18 | 5.0%   |
| Lad1      | 0.07877798  | 0.01 | 15.5%  |
| Lag3      | 0.2276426   | 0.03 | 12.9%  |
| Lage3     | 8.42018     | 0.92 | 10.9%  |
| Lair1     | 0.2548362   | 0.07 | 27.2%  |

|         |             |       |        |
|---------|-------------|-------|--------|
| Lalba   | 0.0241698   | 0.05  | 223.6% |
| Lama1   | 6.583726    | 1.32  | 20.0%  |
| Lama2   | 4.914096    | 0.90  | 18.2%  |
| lama3   | 0.05572538  | 0.01  | 25.1%  |
| Lama3   | 0.02098946  | 0.01  | 28.0%  |
| Lama3B  | 0.08408036  | 0.02  | 19.8%  |
| Lama4   | 1.59186     | 0.28  | 17.5%  |
| Lama5   | 0.2534352   | 0.05  | 18.2%  |
| Lamb1-1 | 15.55136    | 3.32  | 21.3%  |
| Lamb2   | 3.520346    | 0.50  | 14.3%  |
| Lamb3   | 0.09381784  | 0.04  | 40.4%  |
| Lamc1   | 14.84874    | 2.49  | 16.7%  |
| Lamc2   | 0.5909492   | 0.24  | 40.1%  |
| Lamc3   | 0.0171682   | 0.01  | 35.0%  |
| Lamp1   | 109.3304    | 5.62  | 5.1%   |
| Lamp2   | 43.1186     | 1.60  | 3.7%   |
| LAMP2   | 0.1223319   | 0.04  | 31.6%  |
| Lamp3   | 1.324628    | 0.11  | 8.3%   |
| Lancl1  | 24.84732    | 0.18  | 0.7%   |
| Lancl2  | 29.44184    | 2.22  | 7.5%   |
| Lancl3  | 2.258742    | 0.47  | 20.9%  |
| Lao1    | 0           | 0.00  |        |
| Lap1B   | 0.33832454  | 0.33  | 96.1%  |
| Lap3    | 7.431442    | 0.44  | 5.9%   |
| Laptm4a | 72.95982    | 4.64  | 6.4%   |
| Laptm4b | 43.90196    | 2.38  | 5.4%   |
| Laptm5  | 0.04069142  | 0.02  | 56.9%  |
| Large   | 32.31168    | 1.43  | 4.4%   |
| Larp1   | 42.61646    | 1.22  | 2.9%   |
| Larp2   | 2.439582    | 0.28  | 11.6%  |
| Larp4   | 10.95862    | 0.40  | 3.7%   |
| Larp5   | 27.49594    | 1.00  | 3.6%   |
| Larp6   | 7.933612    | 0.42  | 5.4%   |
| Larp7   | 3.610104    | 0.38  | 10.6%  |
| Lars    | 15.87734    | 1.10  | 7.0%   |
| Lars2   | 84.23366    | 25.32 | 30.1%  |
| Las1    | 0.039887136 | 0.06  | 140.8% |
| Las1l   | 13.37054    | 0.75  | 5.6%   |
| Lasp1   | 21.24934    | 1.65  | 7.7%   |
| Lass1   | 27.07692    | 2.07  | 7.6%   |
| Lass2   | 11.1066     | 0.65  | 5.8%   |
| Lass3   | 0.07832012  | 0.03  | 43.4%  |
| Lass4   | 11.74912    | 0.69  | 5.9%   |
| Lass5   | 23.43776    | 1.67  | 7.1%   |
| Lass6   | 12.95546    | 1.24  | 9.6%   |
| Lat     | 0.1659978   | 0.06  | 34.3%  |
| Lat2    | 0.3162862   | 0.06  | 20.1%  |

|         |            |      |        |
|---------|------------|------|--------|
| Lats1   | 8.562268   | 0.43 | 5.1%   |
| Lats2   | 8.185208   | 3.45 | 42.2%  |
| Lax1    | 0.08810052 | 0.05 | 51.9%  |
| Layn    | 0.216502   | 0.05 | 24.9%  |
| Lba     | 0.4141812  | 0.13 | 32.5%  |
| Lba1    | 13.4928    | 1.12 | 8.3%   |
| Lbh     | 23.28052   | 1.53 | 6.6%   |
| Lbp     | 0.57174    | 0.23 | 40.3%  |
| Lbr     | 4.969962   | 0.36 | 7.3%   |
| Lbx1    | 2.219156   | 0.30 | 13.6%  |
| Lbx2    | 0.11607524 | 0.09 | 77.2%  |
| Lbxcor1 | 4.331548   | 0.61 | 14.1%  |
| Lca5    | 1.84322    | 0.38 | 20.8%  |
| Lcat    | 0.1421626  | 0.03 | 20.4%  |
| Lce1a1  | 0          | 0.00 |        |
| Lce1a2  | 0          | 0.00 |        |
| Lce1b   | 0          | 0.00 |        |
| Lce1c   | 0          | 0.00 |        |
| Lce1d   | 0          | 0.00 |        |
| Lce1e   | 0          | 0.00 |        |
| Lce1f   | 0          | 0.00 |        |
| Lce1g   | 0.00600792 | 0.01 | 223.6% |
| Lce1h   | 0          | 0.00 |        |
| Lce1i   | 0          | 0.00 |        |
| Lce1l   | 0          | 0.00 |        |
| Lce1m   | 0          | 0.00 |        |
| Lce3a   | 0.01169358 | 0.03 | 223.6% |
| Lce3b   | 0          | 0.00 |        |
| Lce3c   | 0          | 0.00 |        |
| Lce3f   | 0          | 0.00 |        |
| Lck     | 1.0438298  | 0.18 | 17.3%  |
| Lcmt1   | 24.78638   | 1.72 | 6.9%   |
| Lcmt2   | 1.523888   | 0.33 | 21.6%  |
| Lcn10   | 0          | 0.00 |        |
| Lcn11   | 0          | 0.00 |        |
| Lcn12   | 0          | 0.00 |        |
| Lcn13   | 0          | 0.00 |        |
| Lcn2    | 0.23619218 | 0.13 | 54.8%  |
| Lcn3    | 0          | 0.00 |        |
| Lcn4    | 0          | 0.00 |        |
| Lcn5    | 0          | 0.00 |        |
| Lcn8    | 0          | 0.00 |        |
| Lcn9    | 0          | 0.00 |        |
| Lcor    | 1.52177    | 0.10 | 6.3%   |
| Lcorl   | 6.481018   | 0.63 | 9.7%   |
| Lcp1    | 0.3812576  | 0.06 | 15.6%  |
| Lcp2    | 0.08589762 | 0.03 | 39.3%  |

|          |             |       |        |
|----------|-------------|-------|--------|
| Lcrn     | 0.04003606  | 0.04  | 92.7%  |
| Lct      | 0.002209264 | 0.00  | 138.6% |
| Lctl     | 0.01370074  | 0.01  | 60.7%  |
| Ldb1     | 46.41576    | 2.22  | 4.8%   |
| Ldb2     | 8.385442    | 0.83  | 9.8%   |
| Ldb3     | 0.4180248   | 0.14  | 33.8%  |
| Ldha     | 63.23656    | 10.68 | 16.9%  |
| Ldhal6b  | 0.07331524  | 0.04  | 54.3%  |
| Ldhb     | 97.37934    | 2.88  | 3.0%   |
| Ldhc     | 0.00521268  | 0.01  | 223.6% |
| Ldhd     | 0.10317968  | 0.03  | 32.1%  |
| LDLB     | 2.25138     | 0.88  | 39.1%  |
| Ldlr     | 14.4517     | 1.00  | 6.9%   |
| Ldlrad2  | 0           | 0.00  |        |
| Ldlrad3  | 5.167666    | 0.53  | 10.2%  |
| Ldlrap1  | 0.5988472   | 0.14  | 23.3%  |
| Ldoc1    | 0.04715628  | 0.04  | 75.2%  |
| Ldoc1l   | 12.1638     | 1.15  | 9.4%   |
| LE51     | 2.934116    | 0.35  | 11.8%  |
| Leap2    | 0.01540686  | 0.03  | 223.6% |
| Lect1    | 0.01120516  | 0.02  | 154.8% |
| Lect2    | 0.00738582  | 0.02  | 223.6% |
| Lef1     | 0.1280475   | 0.05  | 40.7%  |
| Lefty1   | 0           | 0.00  |        |
| Lefty2   | 0.0207933   | 0.01  | 68.3%  |
| Lelp1    | 0           | 0.00  |        |
| Lemd1    | 1.047168    | 0.19  | 17.7%  |
| Lemd2    | 12.10574    | 1.21  | 10.0%  |
| Lemd3    | 7.898792    | 0.33  | 4.2%   |
| Lenep    | 0.3556816   | 0.08  | 21.8%  |
| Leng1    | 1.861496    | 0.20  | 10.7%  |
| Leng4    | 30.11092    | 1.89  | 6.3%   |
| Leng8    | 32.72432    | 3.23  | 9.9%   |
| Leng9    | 1.914138    | 0.21  | 10.9%  |
| Leo1     | 8.3722      | 0.30  | 3.6%   |
| Lep      | 0.001755748 | 0.00  | 223.6% |
| Lepr     | 0.2464818   | 0.07  | 27.1%  |
| Lepre1   | 3.688602    | 0.52  | 14.2%  |
| Leprel1  | 0.9779692   | 0.19  | 19.4%  |
| Leprel2  | 5.12446     | 0.33  | 6.4%   |
| Leprot   | 9.185782    | 1.04  | 11.3%  |
| Leprotl1 | 34.60106    | 1.22  | 3.5%   |
| Letm1    | 18.60022    | 1.18  | 6.4%   |
| Letm2    | 1.483116    | 0.24  | 16.3%  |
| Letmd1   | 20.53998    | 1.09  | 5.3%   |
| Lfg      | 0.7935838   | 0.71  | 89.2%  |
| Lfng     | 3.512628    | 0.30  | 8.5%   |

|          |            |      |        |
|----------|------------|------|--------|
| Lgals1   | 6.998612   | 2.03 | 29.0%  |
| Lgals12  | 0.01592032 | 0.02 | 137.6% |
| Lgals2   | 0.03139582 | 0.04 | 140.4% |
| Lgals3   | 0.09343418 | 0.07 | 75.1%  |
| Lgals3bp | 1.456744   | 0.29 | 20.1%  |
| Lgals4   | 1.4800408  | 0.48 | 32.7%  |
| Lgals7   | 0          | 0.00 |        |
| Lgals8   | 19.92822   | 0.21 | 1.1%   |
| Lgals9   | 1.773572   | 0.24 | 13.3%  |
| Lgi1     | 3.461782   | 0.25 | 7.1%   |
| Lgi2     | 24.14976   | 1.88 | 7.8%   |
| Lgi3     | 26.1822    | 2.93 | 11.2%  |
| Lgi4     | 0.07845248 | 0.05 | 57.7%  |
| Lgmn     | 47.15904   | 1.21 | 2.6%   |
| Lgr4     | 9.64505    | 0.56 | 5.9%   |
| Lgr5     | 1.499088   | 0.19 | 12.7%  |
| Lgr6     | 0.09444652 | 0.02 | 16.1%  |
| Lgtn     | 6.43811    | 0.36 | 5.5%   |
| Lhb      | 0.0249091  | 0.03 | 138.9% |
| Lhcgr    | 0.05156878 | 0.02 | 33.8%  |
| Lhfp     | 8.041406   | 1.07 | 13.3%  |
| Lhfpl1   | 0.04040124 | 0.04 | 110.3% |
| Lhfpl2   | 5.846598   | 0.65 | 11.2%  |
| Lhfpl3   | 24.59006   | 0.28 | 1.1%   |
| Lhfpl4   | 30.5671    | 1.70 | 5.6%   |
| Lhx1     | 4.998076   | 0.68 | 13.6%  |
| Lhx2     | 7.096192   | 0.85 | 11.9%  |
| Lhx3     | 0.03686444 | 0.02 | 57.4%  |
| Lhx4     | 0.07885146 | 0.02 | 30.3%  |
| Lhx5     | 0.6990254  | 0.12 | 17.1%  |
| Lhx6     | 3.41173    | 0.15 | 4.4%   |
| Lhx8     | 0.01492354 | 0.02 | 118.5% |
| Lhx9     | 1.514636   | 0.17 | 11.0%  |
| Lias     | 10.120226  | 0.57 | 5.7%   |
| Lif      | 0.07499026 | 0.02 | 26.6%  |
| Lifr     | 5.319612   | 0.59 | 11.1%  |
| Lig1     | 9.075718   | 0.25 | 2.7%   |
| lig-2a   | 1.220195   | 1.71 | 140.5% |
| Lig3     | 2.28406    | 0.54 | 23.8%  |
| Lig4     | 3.7249     | 0.44 | 11.9%  |
| Lilrb3   | 0          | 0.00 |        |
| Lilrb4   | 0          | 0.00 |        |
| Lim2     | 0.0064405  | 0.01 | 223.6% |
| Lima1    | 1.956634   | 0.27 | 13.9%  |
| Limch1   | 11.72436   | 0.55 | 4.7%   |
| Limd1    | 2.265616   | 0.15 | 6.6%   |
| limd1    | 0.3229048  | 0.08 | 23.3%  |

|        |            |      |        |
|--------|------------|------|--------|
| Limd2  | 4.66451    | 0.37 | 8.0%   |
| Lime1  | 7.988914   | 1.25 | 15.6%  |
| Limk1  | 58.43418   | 1.98 | 3.4%   |
| Limk2  | 23.89772   | 0.62 | 2.6%   |
| Lims1  | 9.456394   | 0.17 | 1.8%   |
| Lims2  | 0.7384716  | 0.12 | 16.3%  |
| Lin28  | 0.0101586  | 0.02 | 173.5% |
| Lin28b | 2.420328   | 0.16 | 6.7%   |
| Lin37  | 5.135352   | 0.33 | 6.3%   |
| Lin52  | 4.504486   | 0.38 | 8.3%   |
| Lin54  | 0.5361574  | 0.17 | 32.2%  |
| Lin7a  | 23.7918    | 0.39 | 1.6%   |
| Lin7b  | 28.00322   | 4.41 | 15.7%  |
| Lin7c  | 36.15232   | 3.50 | 9.7%   |
| Lin9   | 0.945328   | 0.24 | 25.2%  |
| Lincr  | 0.13029294 | 0.07 | 50.9%  |
| Lingo1 | 34.62286   | 3.97 | 11.5%  |
| Lingo2 | 10.299512  | 0.90 | 8.7%   |
| Lingo4 | 0.6326709  | 0.38 | 59.3%  |
| Lins2  | 2.662016   | 0.49 | 18.6%  |
| Lipa   | 7.014246   | 0.36 | 5.1%   |
| Lipc   | 0.00306464 | 0.01 | 223.6% |
| Lipe   | 2.924184   | 0.19 | 6.5%   |
| Lipf   | 0.0052045  | 0.01 | 223.6% |
| Lipg   | 0.04982926 | 0.04 | 76.7%  |
| Liph   | 0.06729154 | 0.04 | 63.1%  |
| Lipi   | 0.01455474 | 0.01 | 96.1%  |
| Lipk   | 0          | 0.00 |        |
| Lipl3  | 0          | 0.00 |        |
| Lipn   | 0          | 0.00 |        |
| Lipt1  | 1.209454   | 0.12 | 10.1%  |
| Litaf  | 2.20206    | 0.43 | 19.7%  |
| Lix1   | 1.0252968  | 0.09 | 9.3%   |
| Lix1l  | 8.004064   | 0.78 | 9.7%   |
| lkb1   | 2.788508   | 0.18 | 6.6%   |
| Llg1   | 9.587724   | 1.04 | 10.8%  |
| Llg2   | 0.2361632  | 0.10 | 41.6%  |
| Lman1  | 12.51018   | 0.53 | 4.2%   |
| Lman1l | 0          | 0.00 |        |
| Lman2  | 16.79302   | 0.60 | 3.6%   |
| Lman2l | 15.47566   | 0.69 | 4.4%   |
| Lmbr1  | 14.56668   | 1.30 | 9.0%   |
| Lmbr1l | 4.417126   | 0.43 | 9.7%   |
| Lmbrd1 | 21.912     | 1.21 | 5.5%   |
| Lmbrd2 | 26.69004   | 2.35 | 8.8%   |
| Lmcd1  | 0.355566   | 0.05 | 14.2%  |
| Lmln   | 4.337574   | 0.45 | 10.3%  |

|              |             |      |        |
|--------------|-------------|------|--------|
| Lmna         | 14.96662    | 0.96 | 6.4%   |
| Lmnb1        | 6.740734    | 0.54 | 8.0%   |
| Lmnb2        | 5.881468    | 0.58 | 9.8%   |
| Lmo1         | 4.850624    | 0.48 | 9.9%   |
| Lmo2         | 2.520628    | 0.29 | 11.4%  |
| Lmo3         | 9.486932    | 0.26 | 2.7%   |
| Lmo4         | 24.81634    | 2.58 | 10.4%  |
| Lmo6         | 0.10348028  | 0.03 | 24.6%  |
| Lmo7         | 0.3729282   | 0.08 | 22.1%  |
| Lmod1        | 0.017073748 | 0.02 | 99.8%  |
| Lmod2        | 0           | 0.00 |        |
| Lmod3        | 0.01413364  | 0.02 | 172.2% |
| Lmtk2        | 16.76302    | 0.35 | 2.1%   |
| Lmtk3        | 33.4225     | 1.31 | 3.9%   |
| Lmx1a        | 0.13007498  | 0.05 | 40.6%  |
| Lmx1b        | 2.510268    | 0.22 | 8.6%   |
| Lnp          | 6.810902    | 0.92 | 13.5%  |
| Lnpep        | 12.48588    | 1.71 | 13.7%  |
| Lnv          | 0.03286026  | 0.01 | 39.3%  |
| Lnx1         | 5.572926    | 0.37 | 6.6%   |
| Lnx2         | 0.5964854   | 0.07 | 11.7%  |
| LOC100034363 | 1.841248    | 0.47 | 25.3%  |
| LOC100034729 | 0.00291274  | 0.01 | 223.6% |
| LOC100036568 | 0           | 0.00 |        |
| LOC100036766 | 0           | 0.00 |        |
| LOC100037259 | 0           | 0.00 |        |
| LOC100038977 | 0           | 0.00 |        |
| LOC100039065 | 0           | 0.00 |        |
| LOC100039319 | 0           | 0.00 |        |
| LOC100039672 | 0.10598264  | 0.03 | 29.1%  |
| LOC100039834 | 0           | 0.00 |        |
| LOC100039890 | 0           | 0.00 |        |
| LOC100039913 | 0           | 0.00 |        |
| LOC100039945 | 1.25331     | 0.09 | 7.2%   |
| LOC100039948 | 0           | 0.00 |        |
| LOC100039968 | 1.934788    | 0.35 | 18.0%  |
| LOC100040208 | 0           | 0.00 |        |
| LOC100040223 | 0           | 0.00 |        |
| LOC100040233 | 0           | 0.00 |        |
| LOC100040340 | 17.52382    | 2.10 | 12.0%  |
| LOC100040606 | 0           | 0.00 |        |
| LOC100040635 | 0           | 0.00 |        |
| LOC100041488 | 0           | 0.00 |        |
| LOC100041581 | 14.05682    | 1.91 | 13.6%  |
| LOC100041724 | 0.05311306  | 0.05 | 97.5%  |
| LOC100042109 | 0           | 0.00 |        |
| LOC100042144 | 0           | 0.00 |        |

|              |             |      |        |
|--------------|-------------|------|--------|
| LOC100042175 | 0           | 0.00 |        |
| LOC100042180 | 2.80366     | 0.23 | 8.4%   |
| LOC100042254 | 0           | 0.00 |        |
| LOC100042555 | 0.252358    | 0.06 | 25.8%  |
| LOC100042782 | 0           | 0.00 |        |
| LOC100043125 | 0           | 0.00 |        |
| LOC100043216 | 0           | 0.00 |        |
| LOC100043315 | 0           | 0.00 |        |
| LOC100043381 | 0.001843056 | 0.00 | 223.6% |
| LOC100043387 | 0.13508112  | 0.07 | 49.3%  |
| LOC100043860 | 0           | 0.00 |        |
| LOC100043868 | 0           | 0.00 |        |
| LOC100043899 | 0.00489452  | 0.01 | 223.6% |
| LOC171266    | 0           | 0.00 |        |
| LOC195555    | 0           | 0.00 |        |
| LOC217066    | 0.00654506  | 0.01 | 223.6% |
| LOC232875    | 7.233572    | 0.32 | 4.4%   |
| LOC236118    | 0           | 0.00 |        |
| LOC272350    | 0.8760242   | 0.14 | 16.2%  |
| LOC277666    | 0           | 0.00 |        |
| LOC277667    | 0           | 0.00 |        |
| LOC329575    | 2.453466    | 0.23 | 9.5%   |
| LOC332923    | 0           | 0.00 |        |
| LOC380728    | 0.4941662   | 0.15 | 31.3%  |
| LOC380994    | 0           | 0.00 |        |
| LOC381484    | 0.07217802  | 0.07 | 99.2%  |
| LOC381535    | 0           | 0.00 |        |
| LOC381536    | 0           | 0.00 |        |
| LOC381806    | 0.00539806  | 0.01 | 223.6% |
| LOC382044    | 0.0032456   | 0.01 | 223.6% |
| LOC382133    | 0           | 0.00 |        |
| LOC383678    | 0.00998388  | 0.02 | 223.6% |
| LOC384639    | 0           | 0.00 |        |
| LOC384806    | 0           | 0.00 |        |
| LOC432649    | 1.1006448   | 0.14 | 12.6%  |
| LOC433486    | 0           | 0.00 |        |
| LOC433722    | 0           | 0.00 |        |
| LOC433791    | 0.7503668   | 0.10 | 13.3%  |
| LOC434864    | 0           | 0.00 |        |
| LOC434960    | 0           | 0.00 |        |
| LOC435023    | 0           | 0.00 |        |
| LOC435273    | 0           | 0.00 |        |
| LOC435286    | 0           | 0.00 |        |
| LOC435815    | 0           | 0.00 |        |
| LOC435818    | 0           | 0.00 |        |
| LOC436177    | 0.1471443   | 0.08 | 54.7%  |
| LOC436479    | 0.02838668  | 0.02 | 58.1%  |



|           |             |      |        |
|-----------|-------------|------|--------|
| LOC544988 | 0           | 0.00 |        |
| LOC545291 | 0.0671485   | 0.02 | 36.9%  |
| LOC545611 | 0           | 0.00 |        |
| LOC545637 | 0           | 0.00 |        |
| LOC545667 | 0.05985072  | 0.06 | 103.0% |
| LOC545732 | 0           | 0.00 |        |
| LOC546511 | 0           | 0.00 |        |
| LOC546519 | 0.0136825   | 0.02 | 117.0% |
| LOC546840 | 0           | 0.00 |        |
| LOC546849 | 0.07060544  | 0.09 | 124.0% |
| LOC547127 | 0.8408066   | 0.19 | 22.5%  |
| LOC547323 | 0.0278464   | 0.06 | 223.6% |
| LOC548597 | 0           | 0.00 |        |
| LOC554292 | 0.027558192 | 0.01 | 46.3%  |
| LOC574418 | 0.3569256   | 0.08 | 22.3%  |
| LOC620779 | 0.00479744  | 0.01 | 223.6% |
| LOC620807 | 0.01313536  | 0.03 | 223.6% |
| LOC621852 | 0           | 0.00 |        |
| LOC622404 | 11.165842   | 1.35 | 12.1%  |
| LOC622665 | 0.4048924   | 0.17 | 41.3%  |
| LOC623272 | 0           | 0.00 |        |
| LOC625360 | 0           | 0.00 |        |
| LOC625480 | 0           | 0.00 |        |
| LOC625638 | 5.264094    | 0.28 | 5.3%   |
| LOC626578 | 0.03917682  | 0.04 | 90.1%  |
| LOC626832 | 5.526694    | 0.62 | 11.3%  |
| LOC626922 | 0           | 0.00 |        |
| LOC626943 | 0           | 0.00 |        |
| LOC626995 | 0           | 0.00 |        |
| LOC627085 | 0           | 0.00 |        |
| LOC628053 | 0           | 0.00 |        |
| LOC628100 | 0           | 0.00 |        |
| LOC628308 | 1.439024    | 0.24 | 16.7%  |
| LOC631002 | 0           | 0.00 |        |
| LOC631784 | 0           | 0.00 |        |
| LOC634428 | 0.001658364 | 0.00 | 223.6% |
| LOC654842 | 1.9582828   | 1.07 | 54.5%  |
| LOC664987 | 0.01833188  | 0.03 | 137.3% |
| LOC665001 | 0.09346468  | 0.06 | 66.7%  |
| LOC665596 | 0           | 0.00 |        |
| LOC665622 | 0           | 0.00 |        |
| LOC665992 | 0           | 0.00 |        |
| LOC665998 | 0           | 0.00 |        |
| LOC666244 | 3.79506     | 0.51 | 13.4%  |
| LOC666927 | 0           | 0.00 |        |
| LOC667250 | 2.07099     | 0.26 | 12.4%  |
| LOC667370 | 0.4327966   | 0.19 | 43.9%  |

|           |            |      |        |
|-----------|------------|------|--------|
| LOC670464 | 0          | 0.00 |        |
| LOC670482 | 0          | 0.00 |        |
| LOC670496 | 0          | 0.00 |        |
| LOC692132 | 0          | 0.00 |        |
| LOC751864 | 0          | 0.00 |        |
| Loh11cr2a | 6.13981    | 0.64 | 10.4%  |
| Loh12cr1  | 9.106754   | 0.72 | 7.9%   |
| Lonp1     | 25.90276   | 0.40 | 1.5%   |
| Lonp2     | 22.71776   | 1.04 | 4.6%   |
| Lonrf1    | 4.845578   | 0.34 | 7.0%   |
| Lonrf2    | 64.34288   | 1.76 | 2.7%   |
| Lonrf3    | 0.8820898  | 0.22 | 25.2%  |
| Lor       | 3.448608   | 0.24 | 7.0%   |
| Lox       | 6.576528   | 2.00 | 30.4%  |
| Loxhd1    | 0.00949164 | 0.01 | 123.0% |
| Loxl1     | 0.7164516  | 0.14 | 19.3%  |
| Loxl2     | 3.470534   | 1.28 | 36.8%  |
| Loxl3     | 0.5265938  | 0.11 | 21.1%  |
| Loxl4     | 0.4108782  | 0.14 | 34.5%  |
| Lpgat1    | 23.68584   | 2.52 | 10.6%  |
| Lphn1     | 65.3427    | 1.71 | 2.6%   |
| Lphn2     | 24.9546    | 0.66 | 2.6%   |
| Lphn3     | 37.94026   | 1.90 | 5.0%   |
| Lpin1     | 11.76546   | 0.70 | 6.0%   |
| Lpin2     | 13.71926   | 1.27 | 9.2%   |
| Lpin3     | 0.09730876 | 0.03 | 26.0%  |
| Lpl       | 9.693946   | 0.64 | 6.6%   |
| Lpla2     | 1.3282856  | 0.63 | 47.4%  |
| Lpo       | 0.1899872  | 0.06 | 32.2%  |
| Lpp       | 0.415615   | 0.04 | 8.9%   |
| lpr       | 0          | 0.00 |        |
| Lpxn      | 0.170826   | 0.05 | 30.4%  |
| Lrat      | 0.05375604 | 0.02 | 40.4%  |
| Lrba      | 2.758604   | 0.25 | 8.9%   |
| Lrch1     | 8.41435    | 0.25 | 2.9%   |
| Lrch2     | 6.975212   | 0.55 | 7.9%   |
| Lrch3     | 4.708472   | 0.29 | 6.2%   |
| Lrch4     | 1.936162   | 0.32 | 16.6%  |
| Lrdd      | 0.9369652  | 0.14 | 14.7%  |
| Lrfn1     | 25.39654   | 1.80 | 7.1%   |
| Lrfn2     | 6.431082   | 0.81 | 12.6%  |
| Lrfn3     | 9.333484   | 0.73 | 7.8%   |
| Lrfn4     | 22.77592   | 2.59 | 11.4%  |
| Lrfn5     | 29.62788   | 1.45 | 4.9%   |
| Lrg1      | 0.03965662 | 0.05 | 134.2% |
| Lrig1     | 9.416564   | 0.45 | 4.8%   |
| Lrig2     | 6.249734   | 0.52 | 8.3%   |

|        |             |      |        |
|--------|-------------|------|--------|
| Lrig3  | 1.417084    | 0.23 | 16.5%  |
| Lrit1  | 0.001523868 | 0.00 | 223.6% |
| Lrit2  | 0           | 0.00 |        |
| Lrmp   | 0.13410744  | 0.15 | 112.0% |
| Lrp1   | 16.15576    | 1.97 | 12.2%  |
| Lrp10  | 6.78529     | 0.48 | 7.1%   |
| Lrp11  | 27.20108    | 1.57 | 5.8%   |
| Lrp12  | 22.96322    | 0.78 | 3.4%   |
| Lrp1b  | 2.331834    | 0.40 | 17.3%  |
| Lrp2   | 0.6774238   | 0.29 | 43.2%  |
| Lrp2bp | 0.462658    | 0.18 | 39.7%  |
| Lrp3   | 24.71908    | 0.89 | 3.6%   |
| Lrp4   | 2.291762    | 0.50 | 21.8%  |
| Lrp5   | 1.372544    | 0.15 | 10.9%  |
| Lrp6   | 3.573012    | 0.35 | 9.7%   |
| Lrp8   | 11.49576    | 1.20 | 10.4%  |
| Lrpap1 | 40.28398    | 1.08 | 2.7%   |
| Lrpprc | 22.10782    | 0.86 | 3.9%   |
| Lrrc1  | 1.313624    | 0.10 | 7.5%   |
| Lrrc10 | 0.0046896   | 0.01 | 223.6% |
| Lrrc14 | 13.42998    | 0.96 | 7.2%   |
| Lrrc15 | 0.002727152 | 0.00 | 138.7% |
| Lrrc16 | 8.75805     | 0.35 | 4.0%   |
| Lrrc17 | 2.76052     | 1.21 | 43.9%  |
| Lrrc18 | 0.02147592  | 0.02 | 75.7%  |
| Lrrc19 | 0.01935398  | 0.02 | 99.1%  |
| Lrrc2  | 0.1731562   | 0.04 | 23.9%  |
| Lrrc20 | 3.241568    | 0.24 | 7.3%   |
| Lrrc23 | 0.08070794  | 0.04 | 49.7%  |
| Lrrc24 | 17.37344    | 0.53 | 3.0%   |
| Lrrc25 | 0           | 0.00 |        |
| Lrrc26 | 0.8321204   | 0.10 | 12.0%  |
| Lrrc27 | 4.071234    | 0.13 | 3.1%   |
| Lrrc28 | 9.74434     | 0.87 | 9.0%   |
| Lrrc29 | 1.2580678   | 0.25 | 20.0%  |
| Lrrc3  | 3.425038    | 0.63 | 18.3%  |
| Lrrc30 | 0.00334202  | 0.01 | 223.6% |
| Lrrc33 | 0.7043692   | 0.04 | 6.1%   |
| Lrrc34 | 0.026138474 | 0.02 | 70.6%  |
| Lrrc36 | 0.039359    | 0.02 | 55.9%  |
| Lrrc38 | 0.1451786   | 0.03 | 21.0%  |
| Lrrc39 | 0.2770874   | 0.07 | 23.5%  |
| Lrrc3b | 11.38634    | 0.68 | 6.0%   |
| Lrrc4  | 13.83252    | 1.12 | 8.1%   |
| Lrrc40 | 9.472974    | 0.51 | 5.4%   |
| Lrrc41 | 18.30828    | 1.17 | 6.4%   |
| Lrrc42 | 6.021284    | 0.51 | 8.5%   |

|         |            |      |        |
|---------|------------|------|--------|
| Lrrc43  | 0.00618682 | 0.01 | 138.9% |
| Lrrc44  | 0.2390044  | 0.07 | 27.4%  |
| Lrrc45  | 10.135116  | 1.19 | 11.8%  |
| Lrrc46  | 0.4586546  | 0.14 | 30.6%  |
| Lrrc47  | 9.5911     | 1.03 | 10.8%  |
| Lrrc48  | 2.426238   | 0.26 | 10.8%  |
| Lrrc49  | 25.41636   | 1.10 | 4.3%   |
| Lrrc4b  | 54.31934   | 3.59 | 6.6%   |
| Lrrc4c  | 15.62552   | 0.45 | 2.9%   |
| Lrrc50  | 0.11200316 | 0.05 | 43.2%  |
| Lrrc51  | 2.49198    | 0.48 | 19.1%  |
| Lrrc52  | 0          | 0.00 |        |
| Lrrc55  | 0.7810218  | 0.10 | 12.9%  |
| Lrrc56  | 0.9889812  | 0.15 | 14.9%  |
| Lrrc57  | 5.200798   | 1.15 | 22.1%  |
| Lrrc58  | 26.35276   | 1.09 | 4.1%   |
| Lrrc59  | 42.73022   | 2.98 | 7.0%   |
| Lrrc6   | 0.3366476  | 0.08 | 23.1%  |
| Lrrc61  | 11.4291    | 0.25 | 2.1%   |
| Lrrc62  | 13.38406   | 0.75 | 5.6%   |
| Lrrc7   | 2.580576   | 0.19 | 7.3%   |
| Lrrc8a  | 14.25624   | 0.33 | 2.3%   |
| Lrrc8b  | 7.500298   | 0.74 | 9.9%   |
| Lrrc8c  | 4.185956   | 0.13 | 3.2%   |
| Lrrc8d  | 11.89526   | 0.93 | 7.8%   |
| Lrrc8e  | 0.00486242 | 0.01 | 223.6% |
| Lrrc9   | 0.11427814 | 0.03 | 28.5%  |
| Lrrcc1  | 11.99336   | 0.50 | 4.1%   |
| Lrrfip1 | 11.53878   | 0.72 | 6.2%   |
| Lrrfip2 | 6.16619    | 0.18 | 2.8%   |
| Lrriq1  | 0.08942896 | 0.02 | 24.5%  |
| Lrriq2  | 5.807224   | 1.73 | 29.7%  |
| Lrrk1   | 0.6635932  | 0.03 | 4.2%   |
| Lrrk2   | 1.352176   | 0.21 | 15.6%  |
| Lrrn1   | 18.9954    | 1.01 | 5.3%   |
| Lrrn2   | 18.88698   | 0.86 | 4.6%   |
| Lrrn3   | 19.61462   | 0.88 | 4.5%   |
| Lrrtm1  | 21.18952   | 1.69 | 8.0%   |
| Lrrtm2  | 7.081866   | 0.37 | 5.2%   |
| Lrrtm3  | 9.024514   | 0.72 | 8.0%   |
| Lrrtm4  | 6.681268   | 0.24 | 3.6%   |
| Lrsam1  | 16.00494   | 0.26 | 1.7%   |
| Lrtm1   | 0.00417874 | 0.01 | 223.6% |
| Lrtm2   | 8.738338   | 0.67 | 7.7%   |
| Lsamp   | 49.19702   | 3.61 | 7.3%   |
| Lsg1    | 4.613678   | 0.27 | 5.9%   |
| Lsm1    | 7.520036   | 0.67 | 8.9%   |

|        |            |      |        |
|--------|------------|------|--------|
| Lsm10  | 8.187606   | 0.69 | 8.4%   |
| Lsm11  | 22.44964   | 1.30 | 5.8%   |
| Lsm12  | 12.38134   | 1.06 | 8.6%   |
| Lsm14a | 17.12308   | 0.81 | 4.7%   |
| Lsm14b | 29.3225    | 1.96 | 6.7%   |
| Lsm2   | 3.606368   | 0.80 | 22.3%  |
| Lsm3   | 12.35748   | 1.34 | 10.9%  |
| Lsm4   | 21.28028   | 2.53 | 11.9%  |
| Lsm5   | 0.9651752  | 0.32 | 33.5%  |
| Lsm6   | 14.69326   | 0.77 | 5.3%   |
| Lsm7   | 0.9467332  | 0.13 | 13.7%  |
| Lsm8   | 9.318832   | 0.70 | 7.5%   |
| Lsmd1  | 14.6905    | 0.74 | 5.0%   |
| Lsp1   | 0.4530798  | 0.10 | 21.1%  |
| Lsr    | 0.7947944  | 0.30 | 37.3%  |
| Lss    | 20.3032    | 1.27 | 6.3%   |
| Lst1   | 0.1860184  | 0.10 | 51.5%  |
| Lta    | 0.02665932 | 0.02 | 73.3%  |
| Lta4h  | 18.78534   | 0.86 | 4.6%   |
| Ltb    | 0.08993778 | 0.09 | 99.9%  |
| Ltb4dh | 0.6986262  | 0.08 | 11.3%  |
| Ltb4r1 | 0.04302974 | 0.02 | 39.7%  |
| Ltb4r2 | 0.0298249  | 0.03 | 93.6%  |
| Ltbp1  | 1.1075844  | 0.12 | 11.1%  |
| Ltbp2  | 0.07344466 | 0.02 | 27.2%  |
| Ltbp3  | 7.698036   | 0.72 | 9.3%   |
| Ltbp-3 | 1.63035    | 0.47 | 29.1%  |
| Ltbp4  | 3.139358   | 0.64 | 20.4%  |
| Ltbr   | 1.0170352  | 0.18 | 17.7%  |
| Ltc4s  | 0.05972374 | 0.10 | 169.4% |
| Ltf    | 0.00572286 | 0.01 | 144.2% |
| Ltk    | 3.165042   | 0.30 | 9.6%   |
| Ltv1   | 4.334774   | 0.21 | 4.7%   |
| Luc7l  | 28.75312   | 2.01 | 7.0%   |
| Luc7l2 | 27.29016   | 1.48 | 5.4%   |
| Lum    | 10.207628  | 2.24 | 22.0%  |
| Luzp1  | 18.22184   | 2.05 | 11.2%  |
| Luzp2  | 4.974998   | 0.16 | 3.2%   |
| Lvrn   | 0.017452   | 0.02 | 105.2% |
| Lxn    | 5.491086   | 0.72 | 13.2%  |
| Ly49A  | 0          | 0.00 |        |
| Ly49G  | 0          | 0.00 |        |
| Ly-49Q | 0          | 0.00 |        |
| Ly-49W | 0          | 0.00 |        |
| Ly6a   | 0.28786722 | 0.17 | 57.8%  |
| Ly6c1  | 0.0756309  | 0.08 | 107.7% |
| Ly6c2  | 0.00849108 | 0.02 | 223.6% |

|         |             |       |        |
|---------|-------------|-------|--------|
| Ly6d    | 0.0652604   | 0.04  | 56.8%  |
| Ly6e    | 30.48124    | 2.55  | 8.4%   |
| Ly6f    | 0           | 0.00  |        |
| Ly6g5b  | 0.134395    | 0.07  | 53.8%  |
| Ly6g5c  | 0           | 0.00  |        |
| Ly6g6c  | 0.00651968  | 0.01  | 223.6% |
| Ly6g6d  | 0           | 0.00  |        |
| Ly6g6e  | 0           | 0.00  |        |
| Ly6h    | 176.9146    | 19.70 | 11.1%  |
| Ly6i    | 0           | 0.00  |        |
| Ly6k    | 0.00631882  | 0.01  | 223.6% |
| Ly75    | 0.07856144  | 0.04  | 44.7%  |
| Ly86    | 0           | 0.00  |        |
| Ly9     | 0.005572    | 0.01  | 138.6% |
| Ly96    | 0.541948    | 0.18  | 33.8%  |
| Lyar    | 4.06044     | 0.25  | 6.2%   |
| Lycat   | 9.445586    | 0.90  | 9.5%   |
| Lyg1    | 0.00821836  | 0.02  | 223.6% |
| Lyg2    | 0.0058858   | 0.01  | 223.6% |
| Lyl1    | 0.04989134  | 0.03  | 50.4%  |
| Lyn     | 1.451586    | 0.21  | 14.7%  |
| Lynx1   | 107.56218   | 8.64  | 8.0%   |
| Lypd1   | 48.40502    | 1.78  | 3.7%   |
| Lypd2   | 0           | 0.00  |        |
| Lypd3   | 0.0056595   | 0.01  | 223.6% |
| Lypd4   | 0           | 0.00  |        |
| Lypd5   | 0           | 0.00  |        |
| Lypd6   | 13.502      | 0.62  | 4.6%   |
| Lypla1  | 15.01722    | 1.13  | 7.5%   |
| Lypla2  | 27.32458    | 2.13  | 7.8%   |
| Lypla3  | 6.180504    | 0.51  | 8.2%   |
| Lyplal1 | 8.200794    | 0.69  | 8.4%   |
| Lyrm1   | 3.21818     | 0.56  | 17.3%  |
| Lyrm2   | 11.79776    | 0.32  | 2.7%   |
| Lyrm4   | 11.67512    | 0.93  | 8.0%   |
| Lyrm5   | 9.670892    | 0.65  | 6.8%   |
| Lyrm7   | 1.0146548   | 0.24  | 24.1%  |
| Lysmd1  | 0.6306104   | 0.07  | 11.8%  |
| Lysmd2  | 12.12586    | 0.85  | 7.0%   |
| Lysmd3  | 3.260316    | 0.20  | 6.2%   |
| Lysmd4  | 12.23198    | 0.76  | 6.2%   |
| Lyst    | 2.558964    | 0.35  | 13.6%  |
| Lyst2   | 24.7233     | 1.91  | 7.7%   |
| Lyve1   | 0.0324254   | 0.03  | 81.0%  |
| Lyz     | 0.006935052 | 0.01  | 170.7% |
| Lyzl1   | 0           | 0.00  |        |
| Lyzl4   | 0.01318934  | 0.02  | 138.2% |

|          |             |       |        |
|----------|-------------|-------|--------|
| Lyzl6    | 0           | 0.00  |        |
| Lyzs     | 0.1337126   | 0.05  | 35.2%  |
| Lzic     | 6.374712    | 0.45  | 7.0%   |
| Lztlf1   | 5.477942    | 0.23  | 4.2%   |
| Lztr1    | 26.31242    | 1.59  | 6.0%   |
| Lzts1    | 1.139314    | 0.11  | 9.5%   |
| Lzts2    | 7.179482    | 0.38  | 5.3%   |
| M11858   | 0           | 0.00  |        |
| M11859   | 0           | 0.00  |        |
| M11860   | 0           | 0.00  |        |
| M11896   | 0.0335766   | 0.08  | 223.6% |
| M12570   | 0           | 0.00  |        |
| M13188   | 0           | 0.00  |        |
| M13677   | 0           | 0.00  |        |
| M13680   | 0           | 0.00  |        |
| M14294   | 0           | 0.00  |        |
| M15063   | 0           | 0.00  |        |
| M16678   | 0           | 0.00  |        |
| M16679   | 0           | 0.00  |        |
| M19910   | 0           | 0.00  |        |
| M20876   | 0           | 0.00  |        |
| M25937   | 93.5917     | 15.29 | 16.3%  |
| M26425   | 0           | 0.00  |        |
| M26448   | 0           | 0.00  |        |
| M34214   | 0           | 0.00  |        |
| M34473   | 0.000420906 | 0.00  | 223.6% |
| M35492   | 0           | 0.00  |        |
| M36767   | 0           | 0.00  |        |
| M37285   | 0           | 0.00  |        |
| M37286   | 0           | 0.00  |        |
| M37296   | 0           | 0.00  |        |
| M37592   | 0           | 0.00  |        |
| M38681   | 0           | 0.00  |        |
| M55219   | 0           | 0.00  |        |
| M6B      | 0.3531762   | 0.10  | 29.2%  |
| M6pr     | 20.2386     | 0.25  | 1.3%   |
| M6prbp1  | 1.1804118   | 0.18  | 15.3%  |
| M71214   | 0           | 0.00  |        |
| M75      | 0.2970416   | 0.13  | 44.1%  |
| M76612   | 0           | 0.00  |        |
| M83997   | 1.1631854   | 0.45  | 38.7%  |
| Mab211l1 | 5.230076    | 0.12  | 2.4%   |
| Mab211l2 | 31.4445     | 4.73  | 15.0%  |
| Macf     | 17.02332    | 1.16  | 6.8%   |
| Macf1    | 20.02732    | 1.09  | 5.5%   |
| Macrocl1 | 6.839994    | 0.87  | 12.7%  |
| Macrocl2 | 7.73886     | 0.56  | 7.2%   |

|               |             |      |        |
|---------------|-------------|------|--------|
| Mad1          | 0.05658898  | 0.01 | 18.3%  |
| Mad1l1        | 5.594208    | 0.69 | 12.4%  |
| Mad2l1        | 2.752242    | 0.54 | 19.5%  |
| Mad2l1bp      | 3.555694    | 0.38 | 10.6%  |
| Mad2l2        | 8.3707      | 0.80 | 9.6%   |
| mADAM33-alpha | 0.004510935 | 0.01 | 215.7% |
| Madcam1       | 0.04956104  | 0.02 | 45.7%  |
| Madd          | 14.475956   | 4.26 | 29.4%  |
| MADP-1        | 2.156298    | 0.55 | 25.7%  |
| Maea          | 56.07912    | 2.95 | 5.3%   |
| Mael          | 0.3011072   | 0.07 | 22.0%  |
| Maf           | 7.886878    | 0.59 | 7.4%   |
| Maf1          | 22.83432    | 0.48 | 2.1%   |
| mAF10         | 0.176261276 | 0.11 | 64.9%  |
| Mafa          | 0.298323    | 0.09 | 31.0%  |
| Mafb          | 1.292157    | 0.32 | 24.7%  |
| Maff          | 1.1197374   | 0.17 | 15.4%  |
| Mafg          | 16.3871     | 1.04 | 6.4%   |
| Mafk          | 1.934054    | 0.15 | 7.7%   |
| Mag           | 0.362373    | 0.31 | 85.2%  |
| Magea1        | 0           | 0.00 |        |
| Magea10       | 0           | 0.00 |        |
| Magea2        | 0           | 0.00 |        |
| Magea3        | 0           | 0.00 |        |
| Magea4        | 0           | 0.00 |        |
| Magea5        | 0           | 0.00 |        |
| Magea6        | 0           | 0.00 |        |
| Magea7        | 0           | 0.00 |        |
| Magea8        | 0           | 0.00 |        |
| Magea9        | 0           | 0.00 |        |
| Mageb18       | 0           | 0.00 |        |
| Mageb2        | 0           | 0.00 |        |
| Mageb3        | 0.02772942  | 0.03 | 114.4% |
| Mageb5        | 0           | 0.00 |        |
| Maged1        | 281.5504    | 5.47 | 1.9%   |
| Maged2        | 109.0204    | 3.85 | 3.5%   |
| Magee1        | 90.23594    | 3.53 | 3.9%   |
| Magee2        | 2.786384    | 0.48 | 17.2%  |
| Mageh1        | 17.31976    | 2.15 | 12.4%  |
| Magi1         | 25.99078    | 1.60 | 6.2%   |
| Magi2         | 8.17152     | 0.33 | 4.1%   |
| Magi3         | 13.59844    | 0.81 | 5.9%   |
| Magix         | 0           | 0.00 |        |
| Magmas        | 0.2473752   | 0.12 | 47.5%  |
| Magoh         | 18.3332     | 1.08 | 5.9%   |
| MAIR-IIa      | 0           | 0.00 |        |
| Mak           | 0.08732258  | 0.04 | 49.9%  |



|           |            |      |        |
|-----------|------------|------|--------|
| Mak10     | 17.22406   | 0.84 | 4.9%   |
| Mal       | 0.15570442 | 0.08 | 54.1%  |
| Mal2      | 19.0393    | 0.86 | 4.5%   |
| Mall      | 0.00651406 | 0.01 | 137.7% |
| Malt1     | 0.825296   | 0.13 | 15.2%  |
| Mamdc2    | 0.594206   | 0.08 | 14.3%  |
| Mamdc4    | 0.2319832  | 0.02 | 10.6%  |
| Maml1     | 1.26933    | 0.15 | 12.0%  |
| Maml2     | 1.277644   | 0.09 | 7.3%   |
| Maml3     | 1.491822   | 0.19 | 12.4%  |
| Man1a     | 3.648494   | 0.43 | 11.9%  |
| Man1a2    | 14.59144   | 0.69 | 4.7%   |
| Man1b1    | 16.9316    | 0.33 | 2.0%   |
| Man1c1    | 4.1725     | 0.22 | 5.4%   |
| Man2a1    | 5.565382   | 0.32 | 5.8%   |
| Man2a2    | 25.31636   | 1.89 | 7.5%   |
| Man2b1    | 6.066762   | 0.29 | 4.8%   |
| Man2b2    | 4.76381    | 0.34 | 7.1%   |
| MAN2B2    | 1.109071   | 0.73 | 66.2%  |
| Man2c1    | 14.32714   | 1.27 | 8.8%   |
| Manba     | 2.404222   | 0.23 | 9.5%   |
| Manbal    | 22.8929    | 1.91 | 8.3%   |
| Manea     | 8.463402   | 0.51 | 6.0%   |
| Mansc1    | 0.3856092  | 0.11 | 28.2%  |
| Maoa      | 9.295094   | 0.63 | 6.8%   |
| Maob      | 0.13088344 | 0.04 | 27.5%  |
| Map1lc3a  | 100.55212  | 9.99 | 9.9%   |
| Map1lc3b  | 82.15334   | 2.83 | 3.4%   |
| Map2k1    | 40.89266   | 2.28 | 5.6%   |
| Map2k1ip1 | 6.731546   | 0.61 | 9.1%   |
| Map2k2    | 21.2034    | 1.78 | 8.4%   |
| Map2k3    | 3.66673    | 0.36 | 9.7%   |
| Map2k4    | 64.31038   | 1.26 | 2.0%   |
| Map2k5    | 11.6763    | 0.34 | 2.9%   |
| Map2k6    | 2.930226   | 0.34 | 11.5%  |
| Map2k7    | 15.754     | 0.43 | 2.7%   |
| Map3k1    | 2.244076   | 0.08 | 3.7%   |
| Map3k10   | 31.84296   | 2.52 | 7.9%   |
| Map3k11   | 3.653136   | 0.10 | 2.8%   |
| Map3k12   | 31.51616   | 0.85 | 2.7%   |
| Map3k13   | 1.966378   | 0.25 | 12.8%  |
| Map3k14   | 0.3307988  | 0.06 | 19.0%  |
| Map3k2    | 2.755776   | 0.51 | 18.5%  |
| Map3k3    | 3.113542   | 0.31 | 9.9%   |
| Map3k4    | 6.888326   | 0.14 | 2.1%   |
| Map3k5    | 1.710126   | 0.13 | 7.7%   |
| Map3k6    | 0.04561162 | 0.01 | 27.3%  |

|           |            |      |       |
|-----------|------------|------|-------|
| Map3k7    | 6.7112     | 0.56 | 8.4%  |
| Map3k7ip1 | 9.311498   | 0.66 | 7.1%  |
| Map3k7ip2 | 14.04352   | 0.58 | 4.1%  |
| Map3k7ip3 | 5.73865    | 0.40 | 6.9%  |
| Map3k8    | 0.13784556 | 0.05 | 33.4% |
| Map3k9    | 9.87734    | 1.08 | 10.9% |
| Map4k1    | 1.1874424  | 0.12 | 9.7%  |
| Map4k2    | 21.6864    | 2.67 | 12.3% |
| Map4k3    | 16.81876   | 0.25 | 1.5%  |
| Map4k4    | 23.78588   | 0.30 | 1.3%  |
| Map4k5    | 5.221488   | 0.31 | 6.0%  |
| Map6d1    | 5.774162   | 0.25 | 4.3%  |
| Mapbpip   | 31.97862   | 2.01 | 6.3%  |
| Mapk1     | 69.81214   | 1.91 | 2.7%  |
| Mapk10    | 42.52534   | 0.93 | 2.2%  |
| Mapk11    | 5.455718   | 0.60 | 10.9% |
| Mapk12    | 2.564376   | 0.39 | 15.3% |
| Mapk13    | 0.05224362 | 0.03 | 66.0% |
| Mapk14    | 10.199192  | 0.71 | 7.0%  |
| Mapk15    | 0.3320098  | 0.09 | 26.5% |
| Mapk1ip1  | 12.65946   | 0.60 | 4.7%  |
| Mapk3     | 45.90352   | 1.53 | 3.3%  |
| Mapk4     | 3.237734   | 0.21 | 6.4%  |
| Mapk6     | 31.57382   | 3.37 | 10.7% |
| Mapk7     | 5.017542   | 0.61 | 12.1% |
| Mapk8     | 28.74144   | 2.00 | 6.9%  |
| Mapk8ip1  | 121.904    | 9.39 | 7.7%  |
| Mapk8ip2  | 89.49546   | 3.52 | 3.9%  |
| Mapk8ip3  | 64.90246   | 2.45 | 3.8%  |
| Mapk9     | 103.5036   | 1.98 | 1.9%  |
| Mapkap1   | 13.79116   | 0.63 | 4.6%  |
| Mapkapk2  | 7.227762   | 0.45 | 6.2%  |
| Mapkapk3  | 0.5460502  | 0.08 | 14.5% |
| Mapkapk5  | 7.122566   | 0.97 | 13.5% |
| Mapkbp1   | 5.59647    | 0.26 | 4.6%  |
| Mapre1    | 29.6681    | 2.18 | 7.3%  |
| Mapre2    | 102.6992   | 5.93 | 5.8%  |
| Mapre3    | 53.28232   | 2.16 | 4.0%  |
| Mapt      | 124.2266   | 9.62 | 7.7%  |
| Marcks    | 63.90784   | 4.36 | 6.8%  |
| Marcksl1  | 88.36064   | 9.31 | 10.5% |
| Marco     | 0          | 0.00 |       |
| Mare      | 3.97997    | 0.41 | 10.3% |
| Mark1     | 21.86354   | 0.80 | 3.7%  |
| Mark2     | 17.16286   | 0.51 | 3.0%  |
| Mark3     | 25.30676   | 1.54 | 6.1%  |
| Mark4     | 16.36194   | 1.41 | 8.6%  |

|          |             |      |        |
|----------|-------------|------|--------|
| Mars     | 19.3073     | 2.22 | 11.5%  |
| Mars2    | 2.360848    | 0.12 | 5.1%   |
| Marveld1 | 2.520202    | 0.31 | 12.3%  |
| Marveld2 | 0.13408258  | 0.05 | 36.7%  |
| Marveld3 | 0.0530963   | 0.03 | 58.1%  |
| Mas1     | 0.01514546  | 0.02 | 107.0% |
| Masp1    | 3.720012    | 0.30 | 8.1%   |
| Masp2    | 2.617178    | 0.46 | 17.6%  |
| masp3    | 0.07029992  | 0.07 | 95.5%  |
| Mass1    | 0           | 0.00 |        |
| Mast1    | 40.0084     | 2.18 | 5.4%   |
| Mast2    | 15.1401     | 0.57 | 3.7%   |
| Mast3    | 0.7977922   | 0.11 | 13.8%  |
| Mast4    | 9.227666    | 0.40 | 4.4%   |
| Mastl    | 0.837449    | 0.10 | 11.6%  |
| Mat1a    | 0.00273196  | 0.01 | 223.6% |
| Mat2a    | 48.11282    | 2.11 | 4.4%   |
| Mat2b    | 15.20302    | 1.02 | 6.7%   |
| mat-4    | 0.034834348 | 0.02 | 56.7%  |
| Matk     | 23.51022    | 2.79 | 11.9%  |
| Matn1    | 0           | 0.00 |        |
| Matn2    | 2.920548    | 0.31 | 10.4%  |
| Matn3    | 0.10385532  | 0.07 | 65.5%  |
| Matn4    | 0.19552058  | 0.09 | 45.8%  |
| Matr3    | 114.9552    | 6.73 | 5.9%   |
| mAWMS3   | 0.03383818  | 0.00 | 10.5%  |
| Max      | 20.13388    | 1.76 | 8.8%   |
| Maz      | 52.5799     | 1.53 | 2.9%   |
| mazr     | 1.1226866   | 0.20 | 17.5%  |
| Mb       | 0.00989768  | 0.02 | 223.6% |
| mBB1     | 21.10168    | 0.89 | 4.2%   |
| Mbc2     | 7.938478    | 0.56 | 7.1%   |
| Mbd1     | 11.18114    | 0.42 | 3.8%   |
| Mbd2     | 8.581518    | 0.42 | 4.9%   |
| Mbd3     | 27.25652    | 2.36 | 8.6%   |
| Mbd3l1   | 0           | 0.00 |        |
| Mbd3l2   | 0.01570304  | 0.01 | 58.3%  |
| Mbd4     | 0.9263692   | 0.09 | 9.3%   |
| Mbd5     | 7.682834    | 0.68 | 8.8%   |
| Mbd6     | 7.402126    | 0.60 | 8.1%   |
| Mbip     | 3.958858    | 0.42 | 10.6%  |
| Mbl1     | 0.00503312  | 0.01 | 223.6% |
| Mbl2     | 0.04361502  | 0.03 | 67.2%  |
| Mbnl1    | 21.17056    | 1.15 | 5.4%   |
| Mbnl2    | 30.43052    | 5.08 | 16.7%  |
| Mbnl3    | 0.2068924   | 0.03 | 14.2%  |
| Mboat1   | 0.2979224   | 0.05 | 17.7%  |

|        |            |      |        |
|--------|------------|------|--------|
| Mboat2 | 6.63287    | 0.26 | 4.0%   |
| Mboat5 | 8.35077    | 0.99 | 11.9%  |
| mboct  | 191.526    | 5.07 | 2.6%   |
| Mbp    | 16.2629    | 2.00 | 12.3%  |
| Mbtd1  | 2.600062   | 0.22 | 8.3%   |
| Mbtps1 | 17.8786    | 1.02 | 5.7%   |
| Mbtps2 | 8.950038   | 0.67 | 7.5%   |
| Mc1r   | 0.02446734 | 0.01 | 51.8%  |
| Mc2r   | 0.0640536  | 0.06 | 99.5%  |
| Mc3r   | 0          | 0.00 |        |
| Mc4r   | 2.46976    | 0.34 | 13.8%  |
| Mc5r   | 0.19893716 | 0.14 | 69.2%  |
| Mcam   | 0.4727826  | 0.10 | 22.1%  |
| Mcart1 | 24.2002    | 1.08 | 4.5%   |
| Mcart6 | 4.952428   | 0.46 | 9.4%   |
| Mcat   | 9.437992   | 0.35 | 3.7%   |
| Mcc    | 1.983252   | 0.09 | 4.5%   |
| Mccc1  | 2.434614   | 0.92 | 37.6%  |
| Mccc2  | 7.451716   | 0.17 | 2.2%   |
| Mcee   | 5.4113     | 0.20 | 3.6%   |
| Mcf2   | 2.878458   | 0.15 | 5.4%   |
| Mcf2l  | 27.73562   | 0.50 | 1.8%   |
| Mcfd2  | 11.83494   | 0.82 | 6.9%   |
| Mchr1  | 1.69337    | 0.43 | 25.6%  |
| Mcl    | 0          | 0.00 |        |
| Mcl1   | 16.26784   | 0.62 | 3.8%   |
| mCLCA1 | 0.0342606  | 0.02 | 50.1%  |
| Mcm10  | 0.5540886  | 0.11 | 20.6%  |
| Mcm2   | 1.953068   | 0.23 | 11.7%  |
| Mcm3   | 1.3088306  | 0.21 | 16.3%  |
| Mcm3ap | 6.729838   | 0.15 | 2.2%   |
| Mcm4   | 2.924986   | 0.31 | 10.5%  |
| Mcm5   | 1.86096    | 0.22 | 11.7%  |
| Mcm6   | 3.373374   | 0.37 | 11.1%  |
| Mcm7   | 1.359214   | 0.16 | 12.0%  |
| Mcm8   | 1.18737    | 0.06 | 4.8%   |
| Mcm9   | 0.8808446  | 0.09 | 10.4%  |
| Mcoln1 | 23.28148   | 0.83 | 3.5%   |
| Mcoln2 | 0          | 0.00 |        |
| Mcoln3 | 0.00387158 | 0.01 | 223.6% |
| Mcph1  | 3.154102   | 0.23 | 7.3%   |
| Mcpt1  | 0          | 0.00 |        |
| Mcpt2  | 0.00646526 | 0.01 | 223.6% |
| Mcpt4  | 0          | 0.00 |        |
| Mcpt8  | 0          | 0.00 |        |
| Mcpt9  | 0          | 0.00 |        |
| Mcrs1  | 3.818014   | 0.52 | 13.5%  |

|        |             |      |        |
|--------|-------------|------|--------|
| Mctp1  | 10.048842   | 0.35 | 3.4%   |
| Mctp2  | 0.0508647   | 0.02 | 42.9%  |
| Mcts1  | 35.7854     | 1.45 | 4.1%   |
| Mcts2  | 9.239202    | 0.82 | 8.9%   |
| mD53   | 0.3397424   | 0.11 | 31.4%  |
| Mdc1   | 3.63427     | 0.29 | 8.0%   |
| Mdcp1  | 3.759886    | 0.37 | 9.8%   |
| mdcr   | 1.3337548   | 0.45 | 34.0%  |
| mDEAH9 | 2.935196    | 0.27 | 9.4%   |
| Mdfi   | 0.7989262   | 0.16 | 19.6%  |
| Mdfic  | 1.2369836   | 0.22 | 18.0%  |
| Mdga1  | 24.54772    | 2.11 | 8.6%   |
| Mdga2  | 8.026472    | 0.60 | 7.5%   |
| Mdh1   | 325.677     | 2.61 | 0.8%   |
| Mdh1b  | 0.5191766   | 0.11 | 20.8%  |
| Mdh2   | 188.9218    | 9.90 | 5.2%   |
| mDj11  | 14.71038    | 1.50 | 10.2%  |
| Mdk    | 9.019962    | 1.41 | 15.6%  |
| Mdl1   | 0.001898848 | 0.00 | 95.0%  |
| mDLG6A | 0.007873918 | 0.01 | 103.7% |
| Mdm1   | 1.374426    | 0.14 | 10.1%  |
| Mdm2   | 10.7994     | 0.53 | 4.9%   |
| Mdm4   | 4.568386    | 0.71 | 15.6%  |
| Mdmx   | 4.492186    | 0.93 | 20.6%  |
| Mdn1   | 2.374698    | 0.44 | 18.4%  |
| Mds1   | 0.27501912  | 0.17 | 60.4%  |
| Me2    | 5.691242    | 0.39 | 6.9%   |
| Me3    | 2.05077     | 0.16 | 7.9%   |
| Mea1   | 49.7679     | 5.88 | 11.8%  |
| Mecp2  | 13.9059     | 0.71 | 5.1%   |
| Mecr   | 10.990282   | 1.02 | 9.3%   |
| Med1   | 12.7604     | 0.56 | 4.4%   |
| Med10  | 14.60988    | 1.79 | 12.3%  |
| Med11  | 4.016892    | 0.48 | 12.0%  |
| Med12  | 4.055032    | 0.20 | 4.9%   |
| Med12l | 4.24662     | 0.52 | 12.3%  |
| Med13  | 6.452848    | 0.23 | 3.6%   |
| Med13l | 5.305994    | 0.27 | 5.1%   |
| Med14  | 18.54102    | 0.91 | 4.9%   |
| Med15  | 9.85398     | 0.32 | 3.2%   |
| Med16  | 10.67286    | 0.22 | 2.0%   |
| Med17  | 4.614284    | 0.17 | 3.6%   |
| Med18  | 1.667466    | 0.26 | 15.8%  |
| Med19  | 18.41516    | 1.77 | 9.6%   |
| Med20  | 10.872568   | 0.98 | 9.0%   |
| Med21  | 17.62276    | 0.90 | 5.1%   |
| Med22  | 14.43208    | 0.48 | 3.3%   |

|           |             |      |        |
|-----------|-------------|------|--------|
| Med23     | 6.43425     | 0.06 | 1.0%   |
| Med24     | 13.0795     | 0.68 | 5.2%   |
| Med25     | 15.79058    | 0.95 | 6.0%   |
| Med26     | 2.669274    | 0.22 | 8.1%   |
| Med27     | 11.8068     | 1.47 | 12.5%  |
| Med28     | 7.631724    | 0.29 | 3.8%   |
| Med29     | 2.341592    | 0.27 | 11.4%  |
| Med30     | 11.24072    | 0.79 | 7.0%   |
| Med31     | 5.432244    | 0.40 | 7.3%   |
| Med4      | 7.120932    | 0.60 | 8.4%   |
| Med6      | 6.813938    | 0.35 | 5.2%   |
| Med7      | 6.876134    | 0.23 | 3.4%   |
| Med8      | 6.712276    | 0.70 | 10.4%  |
| Med9      | 14.75328    | 0.47 | 3.2%   |
| Mef2a     | 9.456852    | 1.00 | 10.6%  |
| Mef2b     | 2.595238    | 0.21 | 8.2%   |
| Mef2c     | 3.04279     | 0.17 | 5.6%   |
| Mef2d     | 16.73116    | 1.63 | 9.7%   |
| Mefv      | 0.00150874  | 0.00 | 223.6% |
| Megf10    | 1.1828492   | 0.14 | 11.5%  |
| Megf11    | 6.627546    | 0.42 | 6.3%   |
| Megf12    | 0.07609286  | 0.02 | 23.1%  |
| Megf6     | 0.9103458   | 0.13 | 14.3%  |
| Megf8     | 14.52454    | 1.73 | 11.9%  |
| Megf9     | 17.9131     | 1.47 | 8.2%   |
| Mei1      | 0.01150166  | 0.02 | 141.2% |
| Meig1     | 0.1899938   | 0.16 | 84.0%  |
| Meis1     | 18.15856    | 1.60 | 8.8%   |
| Meis2     | 19.59664    | 2.45 | 12.5%  |
| meis2a    | 4.644424    | 1.81 | 38.9%  |
| mel1      | 0.004151551 | 0.00 | 92.0%  |
| Mel13     | 9.670586    | 0.46 | 4.8%   |
| Mela      | 0           | 0.00 |        |
| Melk      | 0.4055338   | 0.12 | 28.8%  |
| Memo1     | 11.44184    | 0.70 | 6.1%   |
| Men1      | 24.21426    | 0.93 | 3.8%   |
| Meox1     | 0.00454748  | 0.01 | 137.0% |
| Meox2     | 0.8556204   | 0.12 | 13.8%  |
| Mep1a     | 0.02267464  | 0.02 | 70.9%  |
| Mep1b     | 0.00361196  | 0.01 | 223.6% |
| Mep-1beta | 0.01256626  | 0.03 | 223.6% |
| mEP2e     | 0           | 0.00 |        |
| Mepce     | 9.16657     | 0.42 | 4.6%   |
| Mepe      | 0           | 0.00 |        |
| Mertk     | 0.587178    | 0.10 | 17.6%  |
| Mesdc1    | 6.34282     | 0.21 | 3.2%   |
| Mesdc2    | 12.16244    | 0.53 | 4.4%   |

|           |             |       |        |
|-----------|-------------|-------|--------|
| Mesp1     | 0.01949988  | 0.01  | 59.9%  |
| Mesp2     | 0.11547254  | 0.04  | 35.7%  |
| Mest      | 72.54996    | 10.59 | 14.6%  |
| Met       | 0.4400422   | 0.11  | 25.8%  |
| Metap1    | 15.6286     | 0.33  | 2.1%   |
| Metap2    | 19.32664    | 1.21  | 6.2%   |
| Metapl1   | 3.65162     | 0.30  | 8.2%   |
| Metrn     | 8.361522    | 0.86  | 10.3%  |
| Metrnl    | 2.22794     | 0.18  | 8.0%   |
| Mett10d   | 10.74274    | 0.31  | 2.9%   |
| Mett11d1  | 9.75725     | 0.29  | 2.9%   |
| Mett5d1   | 1.590546    | 0.14  | 8.7%   |
| Mettl1    | 5.031324    | 0.39  | 7.7%   |
| Mettl2    | 6.387928    | 0.30  | 4.7%   |
| Mettl3    | 6.517668    | 0.59  | 9.0%   |
| Mettl4    | 2.467278    | 0.22  | 8.8%   |
| Mettl5    | 5.588448    | 0.52  | 9.2%   |
| Mettl6    | 7.051802    | 0.31  | 4.3%   |
| Mettl7a   | 0.762191    | 0.10  | 12.6%  |
| Mettl7b   | 0.12765074  | 0.06  | 48.0%  |
| Mettl8    | 4.095384    | 0.25  | 6.1%   |
| Mettl9    | 24.71334    | 1.38  | 5.6%   |
| Mex3a     | 2.27873     | 0.10  | 4.3%   |
| Mex3c     | 12.06674    | 0.52  | 4.3%   |
| Mex3d     | 5.869888    | 0.57  | 9.7%   |
| Mfap1a    | 3.90909     | 0.23  | 6.0%   |
| Mfap1b    | 3.96474     | 0.20  | 5.1%   |
| Mfap2     | 8.110646    | 1.01  | 12.5%  |
| Mfap3     | 6.227424    | 0.44  | 7.1%   |
| Mfap3l    | 5.714768    | 0.42  | 7.4%   |
| Mfap4     | 3.96031     | 0.66  | 16.6%  |
| Mfap5     | 0.233234    | 0.13  | 54.6%  |
| Mfge8     | 7.714218    | 1.07  | 13.8%  |
| Mfhas1    | 6.845516    | 0.11  | 1.6%   |
| Mfi2      | 0.00356194  | 0.00  | 137.0% |
| mFKHLA    | 0.04679104  | 0.01  | 18.5%  |
| mFLJ00017 | 0.00639975  | 0.01  | 79.0%  |
| mFLJ00022 | 0.1933164   | 0.04  | 19.5%  |
| mFLJ00025 | 0.06766486  | 0.08  | 111.9% |
| mFLJ00067 | 0.015710862 | 0.01  | 42.8%  |
| mFLJ00088 | 0.7828168   | 0.21  | 27.4%  |
| mFLJ00128 | 0.11593098  | 0.06  | 55.5%  |
| mFLJ00150 | 0.3858972   | 0.14  | 36.6%  |
| mFLJ00177 | 0.10452252  | 0.03  | 30.5%  |
| mFLJ00205 | 0.2153254   | 0.06  | 27.0%  |
| mFLJ00209 | 0.22141274  | 0.13  | 60.3%  |
| mFLJ00251 | 0.7681492   | 0.21  | 27.3%  |

|           |             |      |       |
|-----------|-------------|------|-------|
| mFLJ00267 | 0.011815716 | 0.01 | 55.5% |
| mFLJ00277 | 1.52659     | 0.48 | 31.8% |
| mFLJ00298 | 0.5227906   | 0.11 | 21.1% |
| mFLJ00332 | 0.14667912  | 0.08 | 53.9% |
| mFLJ00369 | 1.425488    | 0.96 | 67.1% |
| mFLJ00377 | 0.4584588   | 0.24 | 52.5% |
| Mfn1      | 15.75216    | 0.93 | 5.9%  |
| Mfn2      | 49.30248    | 0.44 | 0.9%  |
| Mfng      | 0.06826512  | 0.03 | 37.4% |
| Mfrp      | 0.011114032 | 0.01 | 67.0% |
| Mfsd1     | 8.939046    | 0.28 | 3.1%  |
| Mfsd11    | 9.804574    | 1.33 | 13.6% |
| Mfsd2     | 1.209088    | 0.09 | 7.7%  |
| Mfsd3     | 6.119804    | 0.51 | 8.3%  |
| Mfsd4     | 3.760934    | 0.44 | 11.8% |
| Mfsd7     | 0.02260478  | 0.02 | 81.6% |
| Mfsd8     | 2.230242    | 0.20 | 8.8%  |
| Mfsd9     | 2.905574    | 0.18 | 6.1%  |
| Mga       | 5.772076    | 0.91 | 15.7% |
| Mgam      | 0           | 0.00 |       |
| Mgat1     | 12.2473     | 0.61 | 5.0%  |
| Mgat3     | 55.02124    | 1.78 | 3.2%  |
| Mgat4a    | 3.91136     | 0.18 | 4.6%  |
| Mgat4b    | 22.62168    | 1.94 | 8.6%  |
| Mgat4c    | 2.88067     | 0.29 | 10.2% |
| Mgat5     | 16.43746    | 1.37 | 8.3%  |
| Mgat5b    | 16.05052    | 1.44 | 9.0%  |
| MGC107098 | 0           | 0.00 |       |
| MGC107415 | 4.783872    | 0.54 | 11.2% |
| MGC58426  | 0           | 0.00 |       |
| MGC67181  | 2.464272    | 0.17 | 6.8%  |
| MGC68323  | 0.3829254   | 0.11 | 28.3% |
| Mgea5     | 67.4228     | 3.47 | 5.2%  |
| Mgl1      | 0           | 0.00 |       |
| Mgl2      | 0           | 0.00 |       |
| Mgll      | 6.892346    | 0.50 | 7.3%  |
| Mgmt      | 0.7506252   | 0.18 | 23.5% |
| Mgp       | 5.75429     | 1.34 | 23.3% |
| mGpi1     | 3.099348    | 0.39 | 12.5% |
| Mgrn1     | 60.35638    | 2.35 | 3.9%  |
| Mgst1     | 9.750626    | 0.20 | 2.0%  |
| Mgst2     | 0.6136666   | 0.37 | 59.7% |
| Mgst3     | 74.69664    | 6.51 | 8.7%  |
| mHTATIP   | 1.87836     | 0.39 | 21.0% |
| Mia1      | 0.08018266  | 0.07 | 89.6% |
| Mia2      | 0.0355599   | 0.03 | 89.2% |
| Mia3      | 0           | 0.00 |       |



|              |            |      |        |
|--------------|------------|------|--------|
| Mib1         | 22.2462    | 1.30 | 5.9%   |
| Mib2         | 20.07192   | 0.65 | 3.2%   |
| Mical1       | 0.8801576  | 0.14 | 15.5%  |
| Mical2       | 4.965948   | 0.39 | 7.9%   |
| Mical3       | 9.430058   | 0.52 | 5.5%   |
| Micalcl      | 0.0500522  | 0.01 | 26.5%  |
| Micall1      | 5.646674   | 0.38 | 6.8%   |
| Micall2      | 0.2287996  | 0.05 | 22.9%  |
| Mid1         | 7.322802   | 0.87 | 11.9%  |
| Mid1ip1      | 15.86972   | 1.82 | 11.5%  |
| Mid2         | 9.821694   | 0.12 | 1.2%   |
| Midn         | 18.6144    | 1.60 | 8.6%   |
| Mier1        | 5.573714   | 0.46 | 8.3%   |
| Mier2        | 8.175788   | 0.30 | 3.6%   |
| Mier3        | 4.792342   | 0.21 | 4.4%   |
| Mif          | 27.34846   | 1.30 | 4.8%   |
| Mif1         | 2.945526   | 0.30 | 10.1%  |
| Mif4gd       | 4.868478   | 1.38 | 28.4%  |
| Mill1        | 0          | 0.00 |        |
| Mill2        | 0.0916161  | 0.05 | 56.1%  |
| mimp3        | 0.1206896  | 0.06 | 48.8%  |
| Mina         | 1.324484   | 0.24 | 18.4%  |
| MINK         | 0.8744544  | 0.35 | 39.9%  |
| Mink1        | 14.79256   | 0.75 | 5.0%   |
| Minpp1       | 18.2651    | 1.44 | 7.9%   |
| MINT         | 0.08578674 | 0.04 | 46.4%  |
| Miox         | 0          | 0.00 |        |
| Mip          | 0.0288998  | 0.02 | 59.8%  |
| Mipep        | 4.418398   | 0.13 | 3.0%   |
| Mipol1       | 0.7275786  | 0.55 | 75.3%  |
| Mir16        | 69.64668   | 0.85 | 1.2%   |
| Mis12        | 7.687406   | 0.52 | 6.8%   |
| Mitd1        | 2.67811    | 0.14 | 5.3%   |
| Mitf         | 1.263864   | 0.17 | 13.4%  |
| mitsugumin29 | 0.00491782 | 0.01 | 223.6% |
| miwi         | 0.00083331 | 0.00 | 223.6% |
| Mixl1        | 0.01434578 | 0.01 | 59.4%  |
| Mizf         | 4.513466   | 0.33 | 7.4%   |
| Mki67        | 0.9664824  | 0.19 | 19.9%  |
| Mki67ip      | 15.9486    | 1.48 | 9.3%   |
| mKIAA0003    | 0.04591924 | 0.01 | 25.6%  |
| mKIAA0004    | 15.331104  | 7.45 | 48.6%  |
| mKIAA0007    | 0.5002324  | 0.24 | 47.6%  |
| mKIAA0008    | 0.05844032 | 0.01 | 15.4%  |
| mKIAA0010    | 0.02946322 | 0.01 | 47.1%  |
| mKIAA0031    | 3.573428   | 0.88 | 24.7%  |
| mKIAA0044    | 4.273974   | 0.32 | 7.4%   |

|           |             |      |        |
|-----------|-------------|------|--------|
| mKIAA0050 | 0           | 0.00 |        |
| mKIAA0054 | 0.922686    | 0.10 | 11.3%  |
| mKIAA0056 | 2.77564     | 0.46 | 16.7%  |
| mKIAA0074 | 0.05570978  | 0.03 | 54.3%  |
| mKIAA0076 | 1.449998    | 0.39 | 26.7%  |
| mKIAA0079 | 4.0607      | 0.45 | 11.2%  |
| mKIAA0083 | 0.110291    | 0.05 | 42.4%  |
| mKIAA0084 | 0.07190858  | 0.02 | 22.4%  |
| mKIAA0088 | 0.8166892   | 0.21 | 26.0%  |
| mKIAA0097 | 18.1675     | 2.85 | 15.7%  |
| mKIAA0134 | 0.15791392  | 0.09 | 59.2%  |
| mKIAA0135 | 0.6466568   | 0.04 | 6.7%   |
| mKIAA0136 | 0.519547    | 0.21 | 39.6%  |
| mKIAA0137 | 1.666146    | 0.24 | 14.4%  |
| mKIAA0139 | 0.1560842   | 0.07 | 46.9%  |
| mKIAA0145 | 0.782617    | 0.37 | 47.3%  |
| mKIAA0148 | 0.1432884   | 0.05 | 33.8%  |
| mKIAA0154 | 0.8893198   | 0.45 | 50.6%  |
| mKIAA0157 | 0.7555044   | 0.78 | 102.7% |
| mKIAA0164 | 9.376248    | 0.50 | 5.3%   |
| mKIAA0168 | 0.02741856  | 0.02 | 72.3%  |
| mKIAA0169 | 0.8181306   | 0.54 | 65.9%  |
| mKIAA0173 | 0.3147756   | 0.15 | 47.0%  |
| mKIAA0174 | 3.266028    | 0.67 | 20.4%  |
| mKIAA0184 | 4.71206     | 0.44 | 9.2%   |
| mKIAA0189 | 0.09179496  | 0.03 | 32.1%  |
| mKIAA0191 | 0.11154936  | 0.04 | 38.6%  |
| mKIAA0195 | 0.6966786   | 0.48 | 69.1%  |
| mKIAA0200 | 0.3847956   | 0.08 | 20.4%  |
| mKIAA0210 | 0.19190128  | 0.10 | 52.1%  |
| mKIAA0215 | 0.6604956   | 0.18 | 26.6%  |
| mKIAA0225 | 3.182366    | 0.57 | 17.9%  |
| mKIAA0226 | 2.056468    | 0.64 | 31.3%  |
| mKIAA0230 | 0.744072    | 0.51 | 68.1%  |
| mKIAA0236 | 0.612531087 | 0.40 | 64.7%  |
| mKIAA0237 | 0.639909    | 0.17 | 26.4%  |
| mKIAA0241 | 0.1895214   | 0.06 | 29.2%  |
| mKIAA0244 | 0.3117126   | 0.10 | 31.6%  |
| mKIAA0245 | 1.0232346   | 0.18 | 17.3%  |
| mKIAA0248 | 0.22017738  | 0.09 | 41.2%  |
| mKIAA0255 | 2.325786    | 0.38 | 16.5%  |
| mKIAA0259 | 0.0639134   | 0.02 | 27.8%  |
| mKIAA0260 | 0.0374506   | 0.02 | 45.0%  |
| mKIAA0267 | 3.370484    | 0.90 | 26.7%  |
| mKIAA0281 | 1.33749     | 0.33 | 24.8%  |
| mKIAA0294 | 0.18689002  | 0.10 | 51.8%  |
| mKIAA0297 | 0.06950744  | 0.01 | 21.3%  |

|           |             |      |        |
|-----------|-------------|------|--------|
| mKIAA0306 | 0.3877394   | 0.21 | 54.3%  |
| mKIAA0308 | 5.037516    | 0.48 | 9.5%   |
| mKIAA0312 | 0.500435984 | 0.53 | 105.8% |
| mKIAA0318 | 5.1199      | 0.39 | 7.6%   |
| mKIAA0321 | 0.0908332   | 0.04 | 41.4%  |
| mKIAA0326 | 2.366914    | 0.27 | 11.3%  |
| mKIAA0327 | 11.12244    | 1.33 | 12.0%  |
| mKIAA0338 | 3.410196    | 1.61 | 47.2%  |
| mKIAA0340 | 0.7305708   | 0.28 | 38.9%  |
| mKIAA0344 | 0.3267782   | 0.06 | 19.1%  |
| mKIAA0348 | 0.4002212   | 0.10 | 24.0%  |
| mKIAA0350 | 1.3872652   | 0.65 | 46.9%  |
| mKIAA0351 | 0.05314608  | 0.01 | 23.4%  |
| mKIAA0358 | 17.56012    | 3.04 | 17.3%  |
| mKIAA0367 | 0.223086    | 0.07 | 31.5%  |
| mKIAA0368 | 1.1225944   | 0.29 | 26.0%  |
| mKIAA0369 | 7.824888    | 3.48 | 44.5%  |
| mKIAA0370 | 3.31555     | 0.87 | 26.4%  |
| mKIAA0371 | 1.75834     | 0.25 | 14.4%  |
| mKIAA0373 | 1.372466    | 0.16 | 11.9%  |
| mKIAA0375 | 9.287316    | 0.77 | 8.3%   |
| mKIAA0376 | 3.600242    | 0.11 | 3.0%   |
| mKIAA0377 | 0.532781    | 0.26 | 48.7%  |
| mKIAA0378 | 0.0398835   | 0.03 | 81.2%  |
| mKIAA0387 | 0.007362318 | 0.00 | 28.6%  |
| mKIAA0390 | 0.10047728  | 0.08 | 76.9%  |
| mKIAA0397 | 0.7144042   | 0.08 | 11.8%  |
| mKIAA0399 | 0.7900446   | 0.43 | 53.8%  |
| mKIAA0404 | 0.543718    | 0.06 | 10.2%  |
| mKIAA0419 | 1.258012    | 0.15 | 12.2%  |
| mKIAA0429 | 0.021383016 | 0.01 | 41.2%  |
| mKIAA0432 | 0.07002466  | 0.04 | 52.6%  |
| mKIAA0433 | 8.339732    | 1.33 | 15.9%  |
| mKIAA0439 | 0.2806154   | 0.07 | 24.5%  |
| mKIAA0444 | 7.393364    | 0.50 | 6.7%   |
| mKIAA0452 | 0.16174752  | 0.09 | 53.1%  |
| mKIAA0453 | 0.09806204  | 0.02 | 20.2%  |
| mKIAA0460 | 0.24752818  | 0.31 | 127.0% |
| mKIAA0470 | 0.14930826  | 0.05 | 31.7%  |
| mKIAA0471 | 0.1208641   | 0.05 | 39.2%  |
| mKIAA0474 | 1.0091642   | 0.80 | 79.1%  |
| mKIAA0480 | 2.543738    | 0.31 | 12.3%  |
| mKIAA0512 | 0.07457832  | 0.02 | 24.2%  |
| mKIAA0515 | 33.84922    | 2.49 | 7.3%   |
| mKIAA0528 | 1.3251824   | 0.29 | 22.2%  |
| mKIAA0532 | 0.05865132  | 0.01 | 25.2%  |
| mKIAA0538 | 0.2740106   | 0.11 | 40.1%  |

|           |            |      |        |
|-----------|------------|------|--------|
| mKIAA0544 | 7.643294   | 1.00 | 13.1%  |
| mKIAA0545 | 1.3904     | 0.22 | 15.7%  |
| mKIAA0560 | 0.4570644  | 0.05 | 11.6%  |
| mKIAA0561 | 7.602478   | 0.37 | 4.9%   |
| mKIAA0569 | 0.5554892  | 0.26 | 46.7%  |
| mKIAA0570 | 32.4502    | 1.73 | 5.3%   |
| mKIAA0578 | 0.7402072  | 0.41 | 55.8%  |
| mKIAA0580 | 3.41239    | 0.29 | 8.4%   |
| mKIAA0585 | 1.812318   | 0.33 | 18.5%  |
| mKIAA0590 | 0.7757344  | 0.24 | 31.6%  |
| mKIAA0595 | 0.4185764  | 0.15 | 35.6%  |
| mKIAA0599 | 0.0229251  | 0.01 | 45.9%  |
| mKIAA0601 | 5.505826   | 0.95 | 17.2%  |
| mKIAA0606 | 0.6371942  | 0.26 | 40.6%  |
| mKIAA0610 | 0.05781348 | 0.05 | 85.9%  |
| mKIAA0612 | 3.173932   | 0.57 | 17.9%  |
| mKIAA0614 | 0.2570708  | 0.10 | 38.5%  |
| mKIAA0621 | 3.014076   | 0.59 | 19.5%  |
| mKIAA0629 | 34.57794   | 0.64 | 1.9%   |
| mKIAA0634 | 0.01600298 | 0.01 | 72.7%  |
| mKIAA0636 | 0.10953752 | 0.04 | 35.5%  |
| mKIAA0639 | 0.2515194  | 0.06 | 24.5%  |
| mKIAA0640 | 0.2146403  | 0.14 | 66.5%  |
| mKIAA0641 | 6.958352   | 0.79 | 11.4%  |
| mKIAA0650 | 1.931564   | 0.60 | 31.3%  |
| mKIAA0651 | 0.4177242  | 0.14 | 32.8%  |
| mKIAA0656 | 10.976306  | 1.34 | 12.2%  |
| mKIAA0665 | 0.08611862 | 0.03 | 37.5%  |
| mKIAA0666 | 6.35049    | 2.71 | 42.7%  |
| mKIAA0676 | 5.825228   | 2.46 | 42.2%  |
| mKIAA0694 | 2.730024   | 0.41 | 14.9%  |
| mKIAA0696 | 2.325906   | 0.97 | 41.8%  |
| mKIAA0701 | 3.812706   | 0.62 | 16.3%  |
| mKIAA0703 | 0.03408226 | 0.01 | 34.9%  |
| mKIAA0716 | 1.1093608  | 1.58 | 142.5% |
| mKIAA0720 | 2.670922   | 0.49 | 18.3%  |
| mKIAA0737 | 0.3172612  | 0.05 | 16.6%  |
| mKIAA0744 | 0.8998016  | 0.38 | 42.5%  |
| mKIAA0750 | 1.2590692  | 0.21 | 16.6%  |
| mKIAA0753 | 1.580024   | 0.29 | 18.3%  |
| mKIAA0763 | 41.58106   | 2.00 | 4.8%   |
| mKIAA0769 | 0.0299534  | 0.01 | 17.6%  |
| mKIAA0776 | 2.108978   | 0.26 | 12.3%  |
| mKIAA0783 | 7.12524    | 0.85 | 11.9%  |
| mKIAA0787 | 1.1448576  | 0.29 | 25.0%  |
| mKIAA0788 | 6.210342   | 0.44 | 7.1%   |
| mKIAA0797 | 4.580164   | 1.19 | 25.9%  |

|           |             |      |        |
|-----------|-------------|------|--------|
| mKIAA0804 | 0.02753698  | 0.01 | 25.7%  |
| mKIAA0806 | 1.2445312   | 0.45 | 36.2%  |
| mKIAA0817 | 23.1813     | 1.34 | 5.8%   |
| mKIAA0824 | 0.1171358   | 0.07 | 58.3%  |
| mKIAA0833 | 56.6901     | 2.17 | 3.8%   |
| mKIAA0842 | 2.68965     | 0.37 | 13.7%  |
| mKIAA0847 | 0.22661744  | 0.10 | 45.8%  |
| mKIAA0849 | 0.2373414   | 0.04 | 17.2%  |
| mKIAA0858 | 0.09032978  | 0.08 | 89.5%  |
| mKIAA0866 | 0.000533854 | 0.00 | 154.8% |
| mKIAA0876 | 0.6525992   | 0.16 | 24.3%  |
| mKIAA0881 | 3.469786    | 0.15 | 4.4%   |
| mKIAA0884 | 0.327901    | 0.12 | 35.3%  |
| mKIAA0885 | 0.5351294   | 0.18 | 33.6%  |
| mKIAA0887 | 0.15577392  | 0.06 | 38.2%  |
| mKIAA0889 | 4.302502    | 0.52 | 12.1%  |
| mKIAA0892 | 6.727112    | 0.66 | 9.8%   |
| mKIAA0893 | 0.1456636   | 0.07 | 45.8%  |
| mKIAA0895 | 0.0554704   | 0.03 | 58.5%  |
| mKIAA0896 | 9.084194    | 0.52 | 5.7%   |
| mKIAA0897 | 10.755978   | 0.89 | 8.3%   |
| mKIAA0899 | 0.2753256   | 0.11 | 40.8%  |
| mKIAA0903 | 0.09998436  | 0.02 | 23.4%  |
| mKIAA0904 | 4.191714    | 0.36 | 8.5%   |
| mKIAA0909 | 1.1350014   | 0.46 | 40.2%  |
| mKIAA0912 | 0.03626458  | 0.02 | 46.9%  |
| mKIAA0919 | 16.35816    | 0.42 | 2.6%   |
| mKIAA0922 | 0.517296    | 0.24 | 45.8%  |
| mKIAA0923 | 9.663944    | 0.95 | 9.9%   |
| mKIAA0933 | 3.67731     | 0.42 | 11.5%  |
| mKIAA0946 | 4.365266    | 0.48 | 11.1%  |
| mKIAA0947 | 0.8467866   | 0.65 | 76.7%  |
| mKIAA0957 | 0.02836582  | 0.01 | 46.4%  |
| mKIAA0961 | 0.3409122   | 0.05 | 15.1%  |
| mKIAA0966 | 0.08159212  | 0.03 | 41.4%  |
| mKIAA0968 | 0.01995308  | 0.00 | 15.0%  |
| mKIAA0977 | 0.005902049 | 0.00 | 59.8%  |
| mKIAA0981 | 0.46405296  | 0.66 | 142.2% |
| mKIAA0993 | 4.920826    | 0.63 | 12.8%  |
| mKIAA0998 | 2.154218    | 0.18 | 8.2%   |
| mKIAA1016 | 2.610392    | 0.20 | 7.7%   |
| mKIAA1019 | 14.32944    | 0.61 | 4.3%   |
| mKIAA1026 | 8.329384    | 1.14 | 13.7%  |
| mKIAA1027 | 10.260536   | 1.28 | 12.4%  |
| mKIAA1028 | 0.9285606   | 0.25 | 26.5%  |
| mKIAA1038 | 0.181975    | 0.07 | 39.1%  |
| mKIAA1039 | 0.919424    | 0.30 | 32.9%  |

|           |            |      |        |
|-----------|------------|------|--------|
| mKIAA1049 | 8.937392   | 3.58 | 40.1%  |
| mKIAA1052 | 0.07878754 | 0.06 | 78.8%  |
| mKIAA1054 | 1.7860082  | 1.01 | 56.6%  |
| mKIAA1055 | 0.05482584 | 0.02 | 37.9%  |
| mKIAA1058 | 2.227448   | 0.47 | 21.0%  |
| mKIAA1064 | 8.847682   | 0.65 | 7.4%   |
| mKIAA1068 | 7.430606   | 2.69 | 36.2%  |
| mKIAA1070 | 0.058674   | 0.02 | 39.3%  |
| mKIAA1076 | 4.348208   | 0.37 | 8.5%   |
| mKIAA1080 | 0.2778704  | 0.07 | 24.9%  |
| mKIAA1084 | 0.05360926 | 0.01 | 22.0%  |
| mKIAA1090 | 2.895718   | 0.29 | 9.8%   |
| mKIAA1102 | 0.11169556 | 0.12 | 104.3% |
| mKIAA1105 | 4.29837    | 0.37 | 8.7%   |
| mKIAA1108 | 0.16532164 | 0.12 | 70.6%  |
| mKIAA1109 | 0.16118012 | 0.05 | 32.0%  |
| mKIAA1110 | 13.10668   | 1.05 | 8.0%   |
| mKIAA1111 | 3.464608   | 0.38 | 10.9%  |
| mKIAA1112 | 1.537002   | 0.13 | 8.6%   |
| mKIAA1122 | 0.2158482  | 0.11 | 52.4%  |
| mKIAA1124 | 4.352076   | 0.76 | 17.5%  |
| mKIAA1125 | 0.09997182 | 0.05 | 48.5%  |
| mKIAA1128 | 0.5288386  | 0.21 | 39.7%  |
| mKIAA1146 | 6.619894   | 0.87 | 13.2%  |
| mKIAA1151 | 3.179928   | 0.34 | 10.7%  |
| mKIAA1158 | 2.385926   | 1.59 | 66.6%  |
| mKIAA1164 | 0.8128786  | 0.26 | 31.4%  |
| mKIAA1178 | 0.9470904  | 0.33 | 34.5%  |
| mKIAA1180 | 15.44418   | 2.97 | 19.3%  |
| mKIAA1181 | 0.02794652 | 0.01 | 45.8%  |
| mKIAA1188 | 0.9738242  | 0.17 | 17.0%  |
| mKIAA1205 | 4.613828   | 0.72 | 15.7%  |
| mKIAA1207 | 0.03954028 | 0.02 | 61.1%  |
| mKIAA1211 | 10.033464  | 0.73 | 7.3%   |
| mKIAA1214 | 0.03086322 | 0.01 | 23.2%  |
| mKIAA1217 | 5.067754   | 0.37 | 7.4%   |
| mKIAA1232 | 0.0655487  | 0.01 | 19.5%  |
| mKIAA1238 | 3.565454   | 0.69 | 19.4%  |
| mKIAA1239 | 1.216768   | 0.14 | 11.3%  |
| mKIAA1244 | 0.15121936 | 0.07 | 43.3%  |
| mKIAA1267 | 4.03638    | 0.74 | 18.3%  |
| mKIAA1272 | 1.343536   | 0.20 | 14.8%  |
| mKIAA1279 | 0.05131792 | 0.01 | 19.9%  |
| mKIAA1281 | 0.6694536  | 0.54 | 81.4%  |
| mKIAA1291 | 0.2807367  | 0.17 | 59.8%  |
| mKIAA1294 | 0.0984735  | 0.05 | 48.2%  |
| mKIAA1296 | 1.893458   | 0.47 | 25.1%  |

|           |            |      |        |
|-----------|------------|------|--------|
| mKIAA1300 | 0.5639236  | 0.10 | 17.2%  |
| mKIAA1308 | 0.2486962  | 0.10 | 40.2%  |
| mKIAA1311 | 2.222302   | 0.47 | 21.0%  |
| mKIAA1317 | 0.4919204  | 0.25 | 51.6%  |
| mKIAA1334 | 0.16041652 | 0.29 | 181.9% |
| mKIAA1337 | 0.5104954  | 0.08 | 15.3%  |
| mKIAA1358 | 3.75946    | 0.46 | 12.3%  |
| mKIAA1369 | 0.0895421  | 0.06 | 66.8%  |
| mKIAA1371 | 3.873844   | 1.37 | 35.2%  |
| mKIAA1376 | 0.9829766  | 0.33 | 33.6%  |
| mKIAA1380 | 7.374308   | 0.43 | 5.9%   |
| mKIAA1382 | 0.2386462  | 0.10 | 40.7%  |
| mKIAA1386 | 1.4298402  | 0.34 | 23.6%  |
| mKIAA1401 | 0.542923   | 0.36 | 67.0%  |
| mKIAA1403 | 0.3785642  | 0.06 | 16.1%  |
| mKIAA1417 | 1.655146   | 0.46 | 27.9%  |
| mKIAA1418 | 0.1673308  | 0.03 | 18.6%  |
| mKIAA1422 | 6.74537    | 1.09 | 16.2%  |
| mKIAA1426 | 0.2824676  | 0.15 | 53.6%  |
| mKIAA1435 | 5.096168   | 1.01 | 19.7%  |
| mKIAA1439 | 0.05909152 | 0.05 | 82.5%  |
| mKIAA1441 | 1.0286394  | 0.37 | 35.8%  |
| mKIAA1453 | 5.983006   | 0.36 | 6.0%   |
| mKIAA1456 | 0.6719186  | 0.33 | 48.5%  |
| mKIAA1458 | 0.4080194  | 0.21 | 51.6%  |
| mKIAA1464 | 0.02684736 | 0.01 | 20.0%  |
| mKIAA1486 | 2.033146   | 0.08 | 3.7%   |
| mKIAA1506 | 0.4154882  | 0.08 | 19.8%  |
| mKIAA1513 | 5.74384    | 0.38 | 6.6%   |
| mKIAA1520 | 1.0018278  | 0.10 | 10.0%  |
| mKIAA1524 | 0.1827256  | 0.08 | 42.6%  |
| mKIAA1526 | 0.05601194 | 0.04 | 73.1%  |
| mKIAA1527 | 0.3916288  | 0.15 | 38.7%  |
| mKIAA1549 | 0.7168696  | 0.31 | 43.3%  |
| mKIAA1558 | 2.110424   | 0.31 | 14.5%  |
| mKIAA1560 | 0.4349308  | 0.16 | 36.8%  |
| mKIAA1565 | 0.367539   | 0.13 | 36.4%  |
| mKIAA1568 | 0.8992386  | 0.41 | 46.1%  |
| mKIAA1575 | 1.924406   | 0.31 | 16.3%  |
| mKIAA1577 | 0.1239976  | 0.02 | 16.4%  |
| mKIAA1584 | 0.1280699  | 0.06 | 46.5%  |
| mKIAA1598 | 0.02069468 | 0.01 | 26.4%  |
| mKIAA1601 | 0.1208941  | 0.04 | 33.3%  |
| mKIAA1605 | 3.93454    | 0.86 | 21.8%  |
| mKIAA1606 | 1.920138   | 0.44 | 22.8%  |
| mKIAA1609 | 0.11561406 | 0.06 | 51.1%  |
| mKIAA1612 | 0.3471858  | 0.08 | 24.0%  |

|           |             |      |        |
|-----------|-------------|------|--------|
| mKIAA1626 | 1.8441506   | 0.75 | 40.5%  |
| mKIAA1627 | 0.3435438   | 0.15 | 44.6%  |
| mKIAA1632 | 3.080088    | 0.46 | 14.9%  |
| mKIAA1633 | 0.2290364   | 0.15 | 67.2%  |
| mKIAA1635 | 5.458746    | 0.26 | 4.8%   |
| mKIAA1643 | 0.05583826  | 0.04 | 68.4%  |
| mKIAA1668 | 3.518266    | 0.25 | 7.0%   |
| mKIAA1672 | 0.016209386 | 0.01 | 37.9%  |
| mKIAA1673 | 27.13922    | 1.71 | 6.3%   |
| mKIAA1680 | 2.1313      | 0.48 | 22.6%  |
| mKIAA1682 | 0.7249972   | 0.28 | 39.0%  |
| mKIAA1685 | 0.1434942   | 0.03 | 24.0%  |
| mKIAA1686 | 7.630308    | 1.46 | 19.1%  |
| mKIAA1694 | 27.56066    | 1.76 | 6.4%   |
| mKIAA1705 | 0.2614186   | 0.13 | 49.9%  |
| mKIAA1707 | 0.196927964 | 0.39 | 198.7% |
| mKIAA1715 | 7.961992    | 0.66 | 8.3%   |
| mKIAA1721 | 0.6944424   | 0.94 | 134.9% |
| mKIAA1724 | 2.509592    | 0.30 | 11.8%  |
| mKIAA1726 | 1.882832    | 0.38 | 20.4%  |
| mKIAA1732 | 0.11220142  | 0.04 | 36.4%  |
| mKIAA1734 | 7.174794    | 1.47 | 20.5%  |
| mKIAA1737 | 0.3634014   | 0.09 | 23.7%  |
| mKIAA1739 | 0.11392678  | 0.04 | 39.0%  |
| mKIAA1741 | 1.369388    | 0.13 | 9.7%   |
| mKIAA1744 | 1.412632    | 0.13 | 9.3%   |
| mKIAA1745 | 0.04386864  | 0.04 | 81.4%  |
| mKIAA1747 | 0.537637    | 0.11 | 20.9%  |
| mKIAA1756 | 0.24627656  | 0.13 | 54.7%  |
| mKIAA1757 | 6.481048    | 0.70 | 10.8%  |
| mKIAA1766 | 3.521156    | 0.61 | 17.2%  |
| mKIAA1767 | 1.18458     | 0.08 | 6.8%   |
| mKIAA1781 | 0.0487035   | 0.01 | 23.5%  |
| mKIAA1790 | 0.0438147   | 0.02 | 51.4%  |
| mKIAA1796 | 0.33001412  | 0.66 | 200.8% |
| mKIAA1823 | 0.02920836  | 0.01 | 25.5%  |
| mKIAA1830 | 1.546276    | 0.20 | 13.1%  |
| mKIAA1833 | 30.76446    | 2.14 | 7.0%   |
| mKIAA1835 | 0.2275912   | 0.08 | 36.8%  |
| mKIAA1839 | 0.04769584  | 0.01 | 17.5%  |
| mKIAA1841 | 1.174204    | 0.51 | 43.7%  |
| mKIAA1849 | 0.252959    | 0.10 | 40.9%  |
| mKIAA1857 | 0.2558456   | 0.06 | 24.4%  |
| mKIAA1860 | 5.69323     | 1.27 | 22.3%  |
| mKIAA1870 | 0.5950034   | 0.06 | 10.7%  |
| mKIAA1884 | 1.0423874   | 0.10 | 9.9%   |
| mKIAA1889 | 9.978096    | 1.09 | 10.9%  |



|           |             |      |        |
|-----------|-------------|------|--------|
| mKIAA1896 | 1.7354044   | 0.53 | 30.8%  |
| mKIAA1897 | 1.1282894   | 0.30 | 26.5%  |
| mKIAA1902 | 2.999732    | 0.58 | 19.2%  |
| mKIAA1911 | 1.2515284   | 0.28 | 22.7%  |
| mKIAA1914 | 0.02650884  | 0.01 | 25.3%  |
| mKIAA1917 | 1.0794598   | 0.15 | 14.1%  |
| mKIAA1921 | 7.553454    | 0.22 | 2.9%   |
| mKIAA1924 | 0.17544216  | 0.13 | 73.0%  |
| mKIAA1933 | 1.580506    | 0.39 | 24.9%  |
| mKIAA1939 | 0.003489674 | 0.00 | 136.9% |
| mKIAA1971 | 0.2419628   | 0.13 | 53.7%  |
| mKIAA1973 | 7.380222    | 0.39 | 5.3%   |
| mKIAA1980 | 0.704134    | 0.25 | 35.5%  |
| mKIAA1981 | 5.760898    | 0.68 | 11.9%  |
| mKIAA1983 | 0.02675718  | 0.01 | 19.2%  |
| mKIAA1992 | 0.07072966  | 0.02 | 30.4%  |
| mKIAA1994 | 1.1110348   | 0.34 | 30.4%  |
| mKIAA1997 | 0.1904212   | 0.08 | 41.6%  |
| mKIAA1998 | 0.690486    | 0.40 | 57.2%  |
| mKIAA2000 | 0.2437647   | 0.26 | 107.1% |
| mKIAA2006 | 0.4077624   | 0.14 | 35.5%  |
| mKIAA2037 | 0.12070662  | 0.04 | 33.1%  |
| mKIAA3005 | 18.94408    | 1.62 | 8.6%   |
| mKIAA3014 | 0.5294038   | 0.11 | 20.0%  |
| mKIAA3015 | 1.1370302   | 0.09 | 8.1%   |
| mKIAA3017 | 4.35517     | 0.77 | 17.6%  |
| mKIAA3020 | 0.6632798   | 0.10 | 15.4%  |
| mKIAA3026 | 0.09712912  | 0.04 | 38.1%  |
| mKIAA3028 | 0.01480072  | 0.01 | 68.4%  |
| mKIAA4006 | 0.3784126   | 0.20 | 52.1%  |
| mKIAA4009 | 1.0310814   | 0.09 | 9.0%   |
| mKIAA4020 | 2.565352    | 0.52 | 20.4%  |
| mKIAA4026 | 0.11793948  | 0.03 | 21.2%  |
| mKIAA4029 | 8.593962    | 0.76 | 8.8%   |
| mKIAA4044 | 0.07428206  | 0.01 | 18.8%  |
| mKIAA4045 | 0.08993114  | 0.03 | 28.4%  |
| mKIAA4046 | 0.590591    | 0.35 | 58.5%  |
| mKIAA4048 | 0.01258082  | 0.01 | 63.9%  |
| mKIAA4051 | 0.7014392   | 0.12 | 17.6%  |
| mKIAA4052 | 0.13000706  | 0.06 | 49.9%  |
| mKIAA4069 | 0.038361282 | 0.04 | 108.1% |
| mKIAA4074 | 0.012887288 | 0.01 | 63.9%  |
| mKIAA4075 | 5.487408    | 1.01 | 18.5%  |
| mKIAA4082 | 3.189306    | 0.37 | 11.5%  |
| mKIAA4083 | 0.1727078   | 0.08 | 45.3%  |
| mKIAA4089 | 0.6238064   | 0.27 | 42.8%  |
| mKIAA4091 | 4.79137     | 0.15 | 3.1%   |

|           |             |      |        |
|-----------|-------------|------|--------|
| mKIAA4093 | 89.83888    | 4.19 | 4.7%   |
| mKIAA4106 | 0.4124498   | 0.11 | 25.5%  |
| mKIAA4110 | 0.7827924   | 0.33 | 42.5%  |
| mKIAA4112 | 2.047952    | 0.50 | 24.2%  |
| mKIAA4114 | 0.009859512 | 0.01 | 132.3% |
| mKIAA4116 | 1.69289     | 0.26 | 15.1%  |
| mKIAA4118 | 0.332472    | 0.11 | 33.1%  |
| mKIAA4119 | 48.93132    | 8.33 | 17.0%  |
| mKIAA4123 | 0.2098174   | 0.08 | 37.3%  |
| mKIAA4128 | 0.256112    | 0.06 | 22.1%  |
| mKIAA4143 | 8.553978    | 0.53 | 6.2%   |
| mKIAA4144 | 0.8205338   | 0.28 | 33.8%  |
| mKIAA4145 | 0.8913346   | 0.34 | 38.7%  |
| mKIAA4155 | 1.0978794   | 0.19 | 17.8%  |
| mKIAA4159 | 2.04207     | 0.44 | 21.5%  |
| mKIAA4162 | 2.159588    | 0.88 | 40.8%  |
| mKIAA4163 | 0.7946514   | 0.61 | 76.4%  |
| mKIAA4170 | 0.07845638  | 0.02 | 31.5%  |
| mKIAA4185 | 3.189538    | 0.90 | 28.3%  |
| mKIAA4187 | 1.448339    | 0.77 | 53.5%  |
| mKIAA4190 | 0.2961592   | 0.13 | 44.4%  |
| mKIAA4191 | 11.62898    | 0.35 | 3.0%   |
| mKIAA4192 | 3.10573     | 1.08 | 34.7%  |
| mKIAA4193 | 0.0495623   | 0.04 | 80.9%  |
| mKIAA4196 | 4.016198    | 0.46 | 11.5%  |
| mKIAA4205 | 0.8155326   | 0.11 | 14.0%  |
| mKIAA4211 | 0.0257885   | 0.02 | 88.8%  |
| mKIAA4216 | 0.3351436   | 0.39 | 117.6% |
| mKIAA4222 | 1.1318082   | 0.49 | 43.7%  |
| mKIAA4226 | 0.0412608   | 0.01 | 13.0%  |
| mKIAA4231 | 0.0339978   | 0.00 | 14.4%  |
| mKIAA4237 | 0.3843928   | 0.31 | 81.4%  |
| mKIAA4245 | 0.026218766 | 0.01 | 40.6%  |
| mKIAA4247 | 0.4524208   | 0.42 | 93.8%  |
| mKIAA4252 | 0.2252437   | 0.15 | 68.5%  |
| mKIAA4253 | 0.40214     | 0.18 | 45.3%  |
| mKIAA4256 | 9.355028    | 1.20 | 12.9%  |
| MKK7      | 0.2357942   | 0.06 | 26.3%  |
| Mkks      | 6.810754    | 1.15 | 16.9%  |
| Mkl1      | 10.65662    | 0.52 | 4.9%   |
| Mkl2      | 2.763208    | 0.21 | 7.4%   |
| Mkln1     | 14.99312    | 0.80 | 5.3%   |
| Mknk1     | 5.614766    | 0.30 | 5.3%   |
| Mknk2     | 10.376572   | 1.01 | 9.8%   |
| MKP-7     | 0.8315676   | 0.70 | 84.2%  |
| Mkrn1     | 58.5516     | 3.22 | 5.5%   |
| Mkrn2     | 12.30016    | 0.47 | 3.9%   |

|         |             |       |        |
|---------|-------------|-------|--------|
| Mkrn3   | 12.5863     | 2.53  | 20.1%  |
| Mks1    | 1.68202     | 0.19  | 11.0%  |
| Mkx     | 2.470754    | 0.44  | 18.0%  |
| Mlana   | 0.01194008  | 0.03  | 223.6% |
| Mlc1    | 19.76408    | 1.15  | 5.8%   |
| Mlf1    | 0.7584432   | 0.11  | 14.2%  |
| Mlf1ip  | 1.695412    | 0.36  | 21.5%  |
| Mlf2    | 123.1988    | 8.85  | 7.2%   |
| Mlh1    | 2.13244     | 0.12  | 5.5%   |
| Mlh3    | 3.842176    | 0.22  | 5.7%   |
| mLIP1   | 2.046048    | 0.81  | 39.6%  |
| Mkl     | 0.01603318  | 0.02  | 95.5%  |
| Mll1    | 4.382978    | 0.38  | 8.6%   |
| Mll2    | 5.196852    | 0.23  | 4.4%   |
| Mll3    | 4.15261     | 0.36  | 8.6%   |
| Mll5    | 25.82674    | 1.52  | 5.9%   |
| Mllt1   | 10.379866   | 1.06  | 10.2%  |
| Mllt10  | 3.836828    | 0.14  | 3.6%   |
| Mllt11  | 270.762     | 27.30 | 10.1%  |
| Mllt3   | 5.399212    | 0.47  | 8.7%   |
| Mllt4   | 11.54174    | 0.50  | 4.3%   |
| Mllt6   | 5.91335     | 0.78  | 13.1%  |
| Mllt7   | 0.10115874  | 0.04  | 44.1%  |
| Mln51   | 13.20816    | 1.29  | 9.8%   |
| Mlph    | 0.0251876   | 0.02  | 86.9%  |
| mlr2    | 0.12757312  | 0.10  | 77.8%  |
| Mlstd1  | 1.1468604   | 0.15  | 13.2%  |
| Mlstd2  | 23.79414    | 1.01  | 4.2%   |
| Mltk    | 0.3692424   | 0.11  | 30.9%  |
| Mlx     | 10.357884   | 0.47  | 4.5%   |
| Mlxip   | 3.060222    | 0.18  | 5.8%   |
| Mlxipl  | 0.049629504 | 0.03  | 55.0%  |
| Mlycd   | 3.898046    | 1.04  | 26.7%  |
| Mlyk    | 0.0827594   | 0.02  | 21.5%  |
| Mlze    | 0.003524862 | 0.01  | 156.0% |
| Mmaa    | 3.60113     | 0.36  | 10.1%  |
| Mmab    | 20.34844    | 1.11  | 5.5%   |
| Mmachc  | 6.664298    | 0.47  | 7.1%   |
| MmCdt1  | 0.0729772   | 0.03  | 41.8%  |
| Mmd     | 28.74326    | 2.95  | 10.3%  |
| Mmd2    | 2.409764    | 0.27  | 11.3%  |
| Mme     | 2.63737     | 0.17  | 6.3%   |
| Mme1    | 0.300093    | 0.08  | 26.2%  |
| MMET-1  | 0.05865146  | 0.03  | 47.7%  |
| Mmh     | 2.13994     | 0.16  | 7.5%   |
| Mmip    | 0.2753284   | 0.06  | 21.9%  |
| MmKIF17 | 1.866632    | 0.35  | 18.9%  |

|           |             |      |        |
|-----------|-------------|------|--------|
| Mmp10     | 0.00367998  | 0.01 | 223.6% |
| Mmp11     | 1.95391     | 0.24 | 12.4%  |
| Mmp12     | 0.04015394  | 0.03 | 75.4%  |
| Mmp13     | 0.00763382  | 0.02 | 223.6% |
| Mmp14     | 8.656288    | 1.68 | 19.4%  |
| Mmp15     | 7.72026     | 0.41 | 5.3%   |
| Mmp16     | 5.002116    | 0.49 | 9.7%   |
| Mmp17     | 6.809542    | 0.51 | 7.5%   |
| Mmp19     | 1.0152128   | 0.14 | 13.8%  |
| Mmp1a     | 0.00374192  | 0.01 | 223.6% |
| Mmp1b     | 0.00001422  | 0.00 | 174.8% |
| Mmp2      | 10.878886   | 2.59 | 23.8%  |
| Mmp20     | 0           | 0.00 |        |
| Mmp21     | 0.00733428  | 0.01 | 150.6% |
| Mmp23     | 0.0510459   | 0.04 | 70.9%  |
| Mmp24     | 17.99606    | 1.73 | 9.6%   |
| Mmp25     | 0.02618918  | 0.02 | 68.7%  |
| Mmp27     | 0           | 0.00 |        |
| Mmp28     | 0.3445118   | 0.08 | 22.1%  |
| Mmp3      | 0.02704554  | 0.02 | 69.0%  |
| Mmp7      | 0.00853774  | 0.02 | 223.6% |
| Mmp8      | 0           | 0.00 |        |
| Mmp9      | 1.596024    | 0.15 | 9.5%   |
| MMR       | 1.2500232   | 0.50 | 40.2%  |
| Mmrn1     | 0.001272384 | 0.00 | 223.6% |
| Mmrn2     | 0.010516566 | 0.01 | 89.2%  |
| Mms19     | 14.81922    | 0.57 | 3.9%   |
| Mn1       | 5.189246    | 0.85 | 16.3%  |
| mNadrin1  | 0.2367044   | 0.11 | 48.4%  |
| Mnat1     | 4.49954     | 0.26 | 5.8%   |
| MNCb-1706 | 25.39954    | 2.91 | 11.4%  |
| Mnd1      | 0.1500234   | 0.11 | 71.1%  |
| Mnda      | 0.03133714  | 0.04 | 139.8% |
| mNfs1     | 0.7342918   | 0.30 | 41.5%  |
| Mnk2      | 0.7226788   | 0.36 | 49.2%  |
| Mns1      | 0.7360708   | 0.05 | 7.1%   |
| Mnt       | 12.27158    | 0.85 | 6.9%   |
| Mnx1      | .3017108    | 0.28 | 9.4%   |
| Moap1     | 21.03092    | 1.34 | 6.3%   |
| Mob2      | 0.7475896   | 0.34 | 45.1%  |
| Mobk1b    | 8.107294    | 0.68 | 8.4%   |
| Mobkl1a   | 7.24587     | 0.49 | 6.8%   |
| Mobkl1b   | 5.840276    | 0.64 | 10.9%  |
| Mobkl2a   | 5.936642    | 1.15 | 19.3%  |
| Mobkl2b   | 0.531344    | 0.05 | 9.5%   |
| Mobkl2c   | 0.6052334   | 0.12 | 19.1%  |
| Mobkl3    | 41.8255     | 1.84 | 4.4%   |

|           |             |      |        |
|-----------|-------------|------|--------|
| Mobp      | 0.20043706  | 0.19 | 93.0%  |
| Mocos     | 0.05042188  | 0.03 | 67.8%  |
| Mocs1     | 2.448378    | 0.21 | 8.7%   |
| Mocs2     | 23.14004    | 0.70 | 3.0%   |
| Mod1      | 13.47204    | 0.83 | 6.2%   |
| Mog       | 0.6748742   | 0.15 | 22.1%  |
| Mogat1    | 0.01988738  | 0.02 | 92.3%  |
| Mogat2    | 0.00941414  | 0.01 | 150.7% |
| MOK       | 0.30846042  | 0.21 | 69.4%  |
| Mon1a     | 3.606952    | 0.24 | 6.7%   |
| Mon1b     | 5.335514    | 0.60 | 11.3%  |
| Mon2      | 15.88006    | 0.97 | 6.1%   |
| Mopt      | 1.8580208   | 1.67 | 89.6%  |
| MOR       | 0.572924104 | 0.69 | 120.3% |
| Morc      | 0.00721262  | 0.01 | 129.6% |
| Morc1     | 0.013507066 | 0.01 | 51.3%  |
| Morc2a    | 9.48994     | 0.30 | 3.2%   |
| Morc2b    | 0.2114558   | 0.02 | 10.9%  |
| Morc3     | 5.86847     | 0.13 | 2.2%   |
| Morc4     | 1.882358    | 0.17 | 9.2%   |
| Morf4I1   | 9.720862    | 0.62 | 6.4%   |
| Morf4I2   | 100.37252   | 5.55 | 5.5%   |
| Morn1     | 0.7111248   | 0.08 | 11.7%  |
| Morn2     | 7.91185     | 1.99 | 25.2%  |
| Morn3     | 0.01343688  | 0.02 | 138.9% |
| Mos       | 0.03175356  | 0.03 | 91.8%  |
| Mosc1     | 0.01249514  | 0.01 | 59.8%  |
| Mosc2     | 8.12752     | 0.85 | 10.4%  |
| Mospd1    | 4.522758    | 0.44 | 9.7%   |
| Mospd2    | 5.705012    | 0.31 | 5.4%   |
| Mospd3    | 19.43324    | 1.65 | 8.5%   |
| Mov10     | 0.7987682   | 0.09 | 11.7%  |
| Mov10I1   | 0.001547966 | 0.00 | 223.6% |
| Moxd1     | 0.2897736   | 0.12 | 40.3%  |
| Moxd2     | 0           | 0.00 |        |
| Mpa2I     | 0.272386    | 0.06 | 21.0%  |
| Mpdu1     | 31.8237     | 2.44 | 7.7%   |
| Mpdz      | 3.189388    | 0.26 | 8.1%   |
| Mpeg1     | 0.4822648   | 0.11 | 22.1%  |
| Mpg       | 6.80163     | 0.78 | 11.5%  |
| mPHLL2    | 0.2956038   | 0.09 | 31.5%  |
| Mphosph1  | 0.751513    | 0.15 | 19.6%  |
| Mphosph10 | 4.022598    | 0.23 | 5.6%   |
| Mphosph6  | 3.20546     | 0.36 | 11.1%  |
| Mphosph8  | 15.99114    | 0.66 | 4.2%   |
| Mphosph9  | 3.435712    | 0.34 | 10.0%  |
| Mpi       | 19.5697     | 0.48 | 2.5%   |

|                    |            |      |        |
|--------------------|------------|------|--------|
| Mpl                | 0          | 0.00 |        |
| mPLD1              | 0.0448197  | 0.04 | 91.5%  |
| Mpnd               | 21.54018   | 1.61 | 7.5%   |
| Mpo                | 0.0104948  | 0.02 | 173.7% |
| Mporc-b            | 0.9689552  | 0.07 | 7.4%   |
| Mpp1               | 17.20376   | 0.51 | 3.0%   |
| Mpp2               | 25.35016   | 1.65 | 6.5%   |
| Mpp3               | 9.140646   | 0.85 | 9.3%   |
| Mpp4               | 0.12963476 | 0.03 | 22.3%  |
| Mpp5               | 4.88665    | 0.92 | 18.8%  |
| Mpp6               | 16.31804   | 0.75 | 4.6%   |
| Mpp7               | 5.851428   | 0.50 | 8.5%   |
| Mppe1              | 5.037776   | 1.28 | 25.4%  |
| Mpped1             | 4.79698    | 0.25 | 5.2%   |
| Mpped2             | 13.03964   | 1.08 | 8.3%   |
| mpp-GalNAc-T12     | 0.16033566 | 0.10 | 64.6%  |
| mpp-GalNAc-T14     | 0.02044028 | 0.00 | 17.2%  |
| mpp-GalNAc-T17(O6) | 0.07414866 | 0.02 | 28.4%  |
| Mpst               | 8.51639    | 1.05 | 12.3%  |
| Mpv17              | 13.76542   | 0.61 | 4.4%   |
| Mpv17l             | 20.32318   | 1.73 | 8.5%   |
| Mpz                | 0.02595506 | 0.02 | 94.1%  |
| Mpzl1              | 11.145744  | 1.20 | 10.7%  |
| Mpzl2              | 0.4994926  | 0.16 | 31.9%  |
| Mpzl3              | 0.3747848  | 0.13 | 34.3%  |
| Mr1                | 0.71699    | 0.13 | 17.7%  |
| Mrap               | 0.0043244  | 0.01 | 223.6% |
| Mras               | 16.09304   | 0.82 | 5.1%   |
| Mrc1               | 0.035526   | 0.02 | 42.4%  |
| Mrc2               | 2.512394   | 0.46 | 18.4%  |
| Mrc1               | 0.00530794 | 0.01 | 137.1% |
| M-rdgB_beta        | 0.04035684 | 0.01 | 17.1%  |
| Mre11a             | 1.688714   | 0.23 | 13.5%  |
| Mreg               | 2.52705    | 0.28 | 11.2%  |
| Mrfap1             | 65.85826   | 1.65 | 2.5%   |
| Mrg1               | 35.74448   | 4.98 | 13.9%  |
| MRG15              | 1.561338   | 0.47 | 29.9%  |
| Mrg2               | 11.03872   | 0.64 | 5.8%   |
| Mrgpra1            | 0          | 0.00 |        |
| Mrgpra2            | 0          | 0.00 |        |
| Mrgpra3            | 0          | 0.00 |        |
| Mrgpra4            | 0          | 0.00 |        |
| Mrgpra6            | 0          | 0.00 |        |
| Mrgprb1            | 0          | 0.00 |        |
| Mrgprb2            | 0          | 0.00 |        |
| Mrgprb3            | 0          | 0.00 |        |
| Mrgprb4            | 0          | 0.00 |        |

|         |           |      |       |
|---------|-----------|------|-------|
| Mrgprb5 | 0         | 0.00 |       |
| Mrgprb8 | 0         | 0.00 |       |
| Mrgprd  | 0         | 0.00 |       |
| Mrgpre  | 6.119498  | 0.36 | 6.0%  |
| Mrgprf  | 0.222691  | 0.09 | 39.9% |
| Mrgprg  | 0         | 0.00 |       |
| Mrgprh  | 0.1329542 | 0.03 | 20.0% |
| Mrgprx1 | 0         | 0.00 |       |
| Mrgprx2 | 0         | 0.00 |       |
| Mrm1    | 6.608592  | 0.31 | 4.8%  |
| Mrmt1   | 2.16224   | 0.39 | 18.1% |
| Mro     | 1.580764  | 0.23 | 14.3% |
| Mrp63   | 7.321794  | 0.40 | 5.4%  |
| Mrpl1   | 7.682898  | 0.69 | 9.0%  |
| Mrpl10  | 29.00686  | 1.27 | 4.4%  |
| Mrpl11  | 27.76644  | 1.37 | 4.9%  |
| Mrpl12  | 24.54644  | 1.51 | 6.1%  |
| Mrpl13  | 11.49352  | 1.15 | 10.0% |
| MRPL13  | 4.025148  | 0.55 | 13.7% |
| Mrpl14  | 14.76152  | 1.66 | 11.3% |
| Mrpl15  | 19.5741   | 1.51 | 7.7%  |
| Mrpl16  | 20.75954  | 1.97 | 9.5%  |
| Mrpl17  | 12.1661   | 1.28 | 10.6% |
| Mrpl18  | 15.01314  | 1.16 | 7.7%  |
| Mrpl19  | 4.647648  | 0.38 | 8.2%  |
| Mrpl2   | 19.13342  | 1.50 | 7.8%  |
| Mrpl20  | 37.23378  | 3.05 | 8.2%  |
| Mrpl21  | 8.071586  | 0.73 | 9.0%  |
| Mrpl22  | 3.268958  | 0.48 | 14.8% |
| Mrpl23  | 0.2170791 | 0.14 | 65.8% |
| Mrpl24  | 13.3844   | 0.88 | 6.6%  |
| Mrpl27  | 11.33702  | 0.84 | 7.4%  |
| Mrpl28  | 19.90474  | 1.28 | 6.4%  |
| Mrpl3   | 15.81618  | 1.19 | 7.5%  |
| Mrpl30  | 16.2032   | 1.31 | 8.1%  |
| Mrpl32  | 12.1796   | 0.91 | 7.5%  |
| Mrpl33  | 25.66058  | 2.80 | 10.9% |
| MRPL33  | 0.182427  | 0.03 | 16.0% |
| Mrpl34  | 14.52352  | 0.86 | 5.9%  |
| Mrpl35  | 12.1247   | 0.22 | 1.8%  |
| Mrpl36  | 11.11406  | 0.73 | 6.6%  |
| Mrpl37  | 20.38972  | 1.23 | 6.0%  |
| Mrpl38  | 21.03814  | 0.86 | 4.1%  |
| Mrpl39  | 15.11018  | 0.61 | 4.0%  |
| Mrpl4   | 11.8481   | 0.57 | 4.8%  |
| MRPL4   | 2.26804   | 0.41 | 18.1% |
| Mrpl40  | 13.24862  | 1.24 | 9.3%  |

|         |           |      |       |
|---------|-----------|------|-------|
| Mrpl41  | 11.17064  | 0.81 | 7.2%  |
| Mrpl43  | 32.72046  | 2.61 | 8.0%  |
| Mrpl44  | 9.796996  | 0.60 | 6.2%  |
| Mrpl45  | 9.813302  | 0.29 | 2.9%  |
| Mrpl46  | 10.719324 | 1.53 | 14.3% |
| Mrpl47  | 8.79398   | 0.67 | 7.7%  |
| Mrpl48  | 6.528572  | 1.64 | 25.1% |
| Mrpl49  | 18.0389   | 0.42 | 2.3%  |
| Mrpl50  | 18.56118  | 1.15 | 6.2%  |
| Mrpl51  | 9.851762  | 0.85 | 8.6%  |
| Mrpl52  | 23.65104  | 3.41 | 14.4% |
| Mrpl53  | 4.997758  | 1.32 | 26.5% |
| Mrpl54  | 13.10906  | 1.50 | 11.4% |
| Mrpl55  | 9.433846  | 0.74 | 7.9%  |
| Mrpl9   | 16.21372  | 0.61 | 3.8%  |
| Mrpplf4 | 0         | 0.00 |       |
| Mrps10  | 11.82556  | 1.32 | 11.2% |
| Mrps11  | 6.287864  | 1.05 | 16.7% |
| MRPS11  | 1.534831  | 0.53 | 34.8% |
| Mrps12  | 18.2058   | 1.28 | 7.0%  |
| Mrps14  | 11.60346  | 0.45 | 3.9%  |
| Mrps15  | 19.66108  | 0.85 | 4.3%  |
| Mrps16  | 17.13206  | 1.20 | 7.0%  |
| Mrps17  | 16.9928   | 1.31 | 7.7%  |
| MRPS17  | 1.5369368 | 0.50 | 32.6% |
| Mrps18a | 32.8      | 2.27 | 6.9%  |
| Mrps18b | 6.569086  | 0.85 | 13.0% |
| Mrps18c | 10.047864 | 1.39 | 13.8% |
| Mrps2   | 12.433928 | 1.94 | 15.6% |
| MRP-S2  | 2.336696  | 1.55 | 66.2% |
| Mrps21  | 11.8801   | 1.22 | 10.2% |
| Mrps22  | 13.42382  | 0.68 | 5.0%  |
| Mrps23  | 15.75364  | 0.57 | 3.6%  |
| Mrps24  | 12.77906  | 1.15 | 9.0%  |
| Mrps25  | 10.014964 | 0.23 | 2.3%  |
| Mrps26  | 17.3999   | 1.39 | 8.0%  |
| Mrps27  | 16.33272  | 1.47 | 9.0%  |
| Mrps28  | 8.674802  | 1.12 | 12.9% |
| Mrps30  | 9.492844  | 0.58 | 6.1%  |
| Mrps31  | 10.77324  | 0.53 | 4.9%  |
| Mrps33  | 2.948968  | 0.46 | 15.5% |
| Mrps34  | 13.59688  | 0.35 | 2.6%  |
| Mrps35  | 14.13506  | 1.36 | 9.6%  |
| Mrps36  | 2.124304  | 0.35 | 16.3% |
| Mrps5   | 7.312274  | 0.27 | 3.6%  |
| MRPS5   | 6.080884  | 1.14 | 18.8% |
| Mrps6   | 31.86652  | 0.81 | 2.5%  |



|          |            |      |        |
|----------|------------|------|--------|
| Mrps7    | 19.73406   | 1.92 | 9.7%   |
| Mrps9    | 12.72656   | 0.20 | 1.6%   |
| Mrrf     | 8.652012   | 0.70 | 8.1%   |
| Mrs2l    | 7.299664   | 0.85 | 11.7%  |
| Mrto4    | 3.40246    | 0.32 | 9.4%   |
| Mrvi1    | 0.4176558  | 0.10 | 23.1%  |
| Ms4a1    | 0          | 0.00 |        |
| Ms4a10   | 0          | 0.00 |        |
| Ms4a13   | 0          | 0.00 |        |
| Ms4a2    | 0.08937172 | 0.08 | 88.4%  |
| Ms4a3    | 0          | 0.00 |        |
| Ms4a4b   | 0          | 0.00 |        |
| Ms4a4c   | 0.00619974 | 0.01 | 223.6% |
| Ms4a4d   | 0.22656148 | 0.10 | 45.5%  |
| Ms4a5    | 0          | 0.00 |        |
| Ms4a6b   | 0          | 0.00 |        |
| Ms4a6c   | 0          | 0.00 |        |
| Ms4a6d   | 0.01062658 | 0.01 | 137.0% |
| Ms4a7    | 0          | 0.00 |        |
| Ms4a8a   | 0          | 0.00 |        |
| Msc      | 1.376314   | 0.14 | 10.1%  |
| M-Septin | 0.04657602 | 0.01 | 25.0%  |
| Msgn1    | 0          | 0.00 |        |
| Msh2     | 11.7606    | 0.37 | 3.1%   |
| Msh3     | 5.727616   | 0.36 | 6.3%   |
| Msh4     | 0.02486758 | 0.01 | 56.1%  |
| Msh5     | 0.06161722 | 0.03 | 49.4%  |
| Msh6     | 5.630238   | 0.23 | 4.0%   |
| Msi1     | 5.374942   | 0.64 | 11.9%  |
| Msi2     | 11.89854   | 0.80 | 6.7%   |
| msi2     | 0.23304296 | 0.12 | 51.4%  |
| Msi2h    | 0.33909242 | 0.28 | 82.7%  |
| Msl2l1   | 9.113382   | 0.34 | 3.7%   |
| Msl3l1   | 8.477574   | 0.39 | 4.6%   |
| Msln     | 0.02106232 | 0.02 | 72.4%  |
| Msemb    | 0          | 0.00 |        |
| mSMO     | 1.2123014  | 0.57 | 46.9%  |
| Msn      | 5.625532   | 0.44 | 7.9%   |
| mSox5L   | 0.17720302 | 0.08 | 42.5%  |
| MSP58    | 0.3017544  | 0.15 | 50.1%  |
| Msr1     | 0.01062996 | 0.01 | 61.7%  |
| Msr2     | 0          | 0.00 |        |
| Msra     | 4.426048   | 0.50 | 11.3%  |
| Msrb2    | 2.525028   | 0.37 | 14.5%  |
| Msrb3    | 0.683337   | 0.09 | 13.6%  |
| mSSH-2L  | 0.04236838 | 0.02 | 45.1%  |
| mSSH-3L  | 1.151232   | 0.52 | 44.9%  |

|         |            |      |        |
|---------|------------|------|--------|
| Mst1    | 0.00483778 | 0.01 | 223.6% |
| Mst1r   | 0.09550594 | 0.04 | 39.2%  |
| Mstn    | 0.00738738 | 0.01 | 138.6% |
| Msto1   | 11.9727    | 1.07 | 9.0%   |
| Msx1    | 1.335082   | 0.10 | 7.5%   |
| Msx2    | 0.12264248 | 0.07 | 54.3%  |
| Msx3    | 0.4521314  | 0.07 | 15.4%  |
| Msy2    | 0.954696   | 0.36 | 37.9%  |
| Mt1     | 113.2858   | 6.98 | 6.2%   |
| Mt2     | 52.76942   | 4.90 | 9.3%   |
| Mt3     | 65.19134   | 6.40 | 9.8%   |
| mt3-mmp | 0.1951194  | 0.07 | 38.3%  |
| Mt4     | 0          | 0.00 |        |
| Mta1    | 17.4329    | 0.53 | 3.0%   |
| Mta2    | 12.06502   | 0.55 | 4.6%   |
| Mta3    | 18.4235    | 2.69 | 14.6%  |
| Mtap    | 8.223156   | 0.45 | 5.5%   |
| Mtap1a  | 89.3444    | 5.10 | 5.7%   |
| Mtap1b  | 124.9308   | 9.48 | 7.6%   |
| Mtap1s  | 15.21424   | 1.03 | 6.8%   |
| Mtap2   | 176.8036   | 6.09 | 3.4%   |
| Mtap4   | 129.8984   | 4.30 | 3.3%   |
| Mtap6   | 69.5427    | 3.91 | 5.6%   |
| Mtap7   | 1.715982   | 0.11 | 6.3%   |
| Mtap7d1 | 39.5731    | 1.30 | 3.3%   |
| Mtap7d2 | 61.59956   | 2.02 | 3.3%   |
| Mtap7d3 | 0.07315828 | 0.02 | 32.5%  |
| Mtap9   | 18.21126   | 1.07 | 5.9%   |
| Mtb     | 0.2901892  | 0.11 | 38.7%  |
| Mtbp    | 0.6718334  | 0.11 | 17.1%  |
| Mtch1   | 151.4932   | 6.00 | 4.0%   |
| Mtch2   | 27.95226   | 1.43 | 5.1%   |
| Mtcp1   | 5.21152    | 0.41 | 7.8%   |
| Mtdh    | 20.80472   | 1.01 | 4.8%   |
| mTdlF1  | 0.0796239  | 0.02 | 20.0%  |
| Mterf   | 0.7426864  | 0.11 | 15.1%  |
| Mterfd1 | 10.319546  | 2.34 | 22.7%  |
| Mterfd2 | 4.320192   | 0.15 | 3.6%   |
| Mterfd3 | 7.238458   | 0.28 | 3.9%   |
| Mtf1    | 3.81903    | 0.50 | 13.0%  |
| Mtf2    | 7.032682   | 0.37 | 5.2%   |
| Mtfmt   | 3.385134   | 0.26 | 7.7%   |
| Mtfr1   | 2.120956   | 0.17 | 8.2%   |
| Mtg1    | 8.889512   | 0.40 | 4.5%   |
| Mthfd1  | 8.149254   | 0.37 | 4.6%   |
| Mthfd1l | 5.83586    | 0.18 | 3.1%   |
| Mthfd2  | 15.55688   | 2.17 | 14.0%  |

|           |            |        |        |
|-----------|------------|--------|--------|
| Mthfr     | 6.216592   | 0.60   | 9.7%   |
| Mthfs     | 1.509638   | 0.36   | 23.8%  |
| Mthfsd    | 6.313006   | 0.48   | 7.5%   |
| mThy28    | 1.637114   | 0.11   | 6.8%   |
| Mtif2     | 9.440496   | 0.32   | 3.4%   |
| Mtif3     | 6.447976   | 0.86   | 13.4%  |
| Mtl5      | 0.08733696 | 0.03   | 33.1%  |
| Mtm1      | 2.862016   | 0.30   | 10.4%  |
| Mtmr1     | 17.080496  | 5.49   | 32.1%  |
| Mtmr10    | 1.912984   | 0.20   | 10.5%  |
| Mtmr11    | 1.1257132  | 0.11   | 10.1%  |
| Mtmr12    | 1.958358   | 0.23   | 11.8%  |
| Mtmr14    | 6.367416   | 0.37   | 5.7%   |
| Mtmr2     | 10.26765   | 0.39   | 3.8%   |
| Mtmr3     | 17.04196   | 0.74   | 4.4%   |
| Mtmr4     | 28.69722   | 0.50   | 1.8%   |
| Mtmr6     | 30.09686   | 0.32   | 1.1%   |
| Mtmr7     | 28.54474   | 2.25   | 7.9%   |
| Mtmr9     | 27.9347    | 1.11   | 4.0%   |
| mt-Nd4    | 1829.65    | 271.59 | 14.8%  |
| Mtnr1a    | 0.00981036 | 0.01   | 141.4% |
| Mtnr1b    | 0          | 0.00   |        |
| Mto1      | 4.828334   | 0.33   | 6.8%   |
| mTOP3beta | 3.568848   | 0.30   | 8.4%   |
| mTPK1     | 0.04562316 | 0.01   | 18.2%  |
| Mtpn      | 88.28344   | 1.95   | 2.2%   |
| MtPolB    | 0.71470432 | 0.41   | 57.5%  |
| Mtr       | 1.582502   | 0.14   | 8.8%   |
| Mtr1      | 0.0251941  | 0.01   | 30.0%  |
| Mtrf1     | 2.94496    | 0.31   | 10.6%  |
| Mtrf1l    | 1.476042   | 0.11   | 7.1%   |
| mTRF2     | 0.6869488  | 0.20   | 29.7%  |
| Mtrr      | 2.545614   | 0.07   | 2.6%   |
| Mtss1     | 28.74646   | 1.79   | 6.2%   |
| Mttp      | 4.221834   | 0.45   | 10.6%  |
| Mtus1     | 4.069992   | 0.37   | 9.0%   |
| Mtvr2     | 0.4390552  | 0.18   | 41.0%  |
| Mtx1      | 12.46114   | 0.98   | 7.9%   |
| Mtx2      | 19.89436   | 1.56   | 7.8%   |
| mUBPY     | 1.2149468  | 0.54   | 44.7%  |
| Muc1      | 0.4228416  | 0.07   | 17.7%  |
| Muc10     | 0          | 0.00   |        |
| Muc13     | 0.00498516 | 0.01   | 138.1% |
| Muc15     | 0.0935859  | 0.03   | 35.8%  |
| Muc19     | 0.00065985 | 0.00   | 223.6% |
| Muc2      | 0.13845744 | 0.03   | 24.6%  |
| MUC2      | 0          | 0.00   |        |

|          |             |      |        |
|----------|-------------|------|--------|
| Muc20    | 0.00206978  | 0.00 | 223.6% |
| Muc3     | 0.0256687   | 0.03 | 114.3% |
| Muc4     | 0.001515518 | 0.00 | 137.3% |
| Muc5ac   | 0.3521174   | 0.20 | 58.1%  |
| Muc5b    | 0.03864176  | 0.04 | 106.6% |
| Muc6     | 0.04387248  | 0.03 | 57.0%  |
| Mug1     | 0.01917186  | 0.00 | 26.0%  |
| Mug2     | 0.011668788 | 0.00 | 33.8%  |
| MUG3     | 0.01984434  | 0.02 | 95.4%  |
| mUGT1    | 0.7003172   | 0.25 | 35.3%  |
| mUGTrel8 | 0.03380478  | 0.02 | 47.8%  |
| Mule     | 1.4667658   | 0.68 | 46.2%  |
| Mum1     | 8.467532    | 0.50 | 5.9%   |
| Mum1l1   | 3.035424    | 0.23 | 7.6%   |
| MuORC4   | 1.1083188   | 0.43 | 39.0%  |
| Mup1     | 0           | 0.00 |        |
| Mup2     | 0           | 0.00 |        |
| Mup3     | 0           | 0.00 |        |
| Mup4     | 0           | 0.00 |        |
| Mup5     | 0           | 0.00 |        |
| Mupcdh   | 0.0090517   | 0.01 | 161.3% |
| Mus81    | 5.092966    | 0.11 | 2.1%   |
| Musk     | 0.02130085  | 0.02 | 77.9%  |
| muspaox  | 1.3597292   | 0.51 | 37.7%  |
| Mustn1   | 0           | 0.00 |        |
| Mut      | 12.14842    | 0.97 | 8.0%   |
| Muted    | 6.512988    | 0.72 | 11.1%  |
| Mutyh    | 0.6117964   | 0.15 | 25.0%  |
| mVAMP-1  | 1.2248904   | 0.74 | 60.1%  |
| Mvd      | 27.56418    | 4.40 | 16.0%  |
| MVD      | 0.10478474  | 0.02 | 14.6%  |
| Mvk      | 27.6256     | 6.43 | 23.3%  |
| Mvp      | 1.0786774   | 0.12 | 11.5%  |
| Mx1      | 0.02178088  | 0.02 | 80.3%  |
| Mx2      | 0.10119354  | 0.04 | 38.2%  |
| Mxd1     | 2.668384    | 0.13 | 4.9%   |
| Mxd3     | 0.5022068   | 0.07 | 14.6%  |
| Mxd4     | 8.12883     | 1.26 | 15.5%  |
| Mxi1     | 7.941758    | 0.62 | 7.8%   |
| Mxra7    | 5.973012    | 0.74 | 12.3%  |
| Mxra8    | 1.880808    | 0.47 | 25.2%  |
| Myadm    | 49.60704    | 1.94 | 3.9%   |
| Myb      | 0.09734838  | 0.02 | 17.2%  |
| Mybbp1a  | 12.37928    | 0.53 | 4.3%   |
| Mybl1    | 1.96794     | 0.29 | 14.9%  |
| Mybl2    | 0.2114228   | 0.06 | 28.0%  |
| Mybpc2   | 0.014575432 | 0.01 | 98.7%  |

|         |             |      |        |
|---------|-------------|------|--------|
| Mybpc3  | 0.001045774 | 0.00 | 223.6% |
| Mybph   | 0.61269274  | 0.56 | 91.2%  |
| Mybphl  | 0           | 0.00 |        |
| Myc     | 7.214546    | 0.92 | 12.8%  |
| Mycbp   | 4.02224     | 0.28 | 6.9%   |
| Mycbpap | 0.1476736   | 0.05 | 30.8%  |
| Mycl1   | 3.079354    | 0.26 | 8.5%   |
| Mycn    | 1.409876    | 0.17 | 12.0%  |
| Mycs    | 0           | 0.00 |        |
| Myct1   | 0.00253452  | 0.01 | 223.6% |
| Myd116  | 15.01142    | 0.88 | 5.8%   |
| Myd88   | 1.1989838   | 0.23 | 19.2%  |
| Myef2   | 22.14056    | 1.36 | 6.2%   |
| Myf5    | 0.00367428  | 0.01 | 223.6% |
| Myf6    | 0           | 0.00 |        |
| Myg1    | 8.46337     | 0.70 | 8.2%   |
| Myh1    | 0.01243263  | 0.01 | 88.1%  |
| Myh10   | 34.5706     | 2.18 | 6.3%   |
| Myh11   | 0.04499368  | 0.02 | 34.6%  |
| Myh13   | 0.01244692  | 0.02 | 142.0% |
| Myh14   | 1.863376    | 0.36 | 19.4%  |
| Myh2    | 0.04859326  | 0.01 | 26.2%  |
| Myh3    | 0.004294656 | 0.01 | 129.2% |
| Myh4    | 0.002543676 | 0.00 | 94.9%  |
| Myh6    | 0.02036916  | 0.01 | 50.1%  |
| Myh7    | 0.08980414  | 0.02 | 17.3%  |
| Myh7b   | 0.281449    | 0.07 | 24.2%  |
| Myh8    | 0.03683174  | 0.01 | 38.0%  |
| Myh9    | 5.26957     | 0.50 | 9.5%   |
| Myl1    | 0.01413714  | 0.02 | 137.0% |
| Myl2    | 0           | 0.00 |        |
| Myl3    | 0.0318344   | 0.03 | 79.3%  |
| Myl4    | 0.5423196   | 0.10 | 19.2%  |
| Myl6    | 38.50686    | 3.26 | 8.5%   |
| Myl6b   | 17.67224    | 0.63 | 3.6%   |
| Myl7    | 0.01556174  | 0.03 | 223.6% |
| Myl9    | 1.576824    | 0.40 | 25.6%  |
| Mylc2b  | 98.06442    | 5.25 | 5.4%   |
| Mylc2pl | 0           | 0.00 |        |
| Mylip   | 3.23315     | 0.30 | 9.4%   |
| Mylk    | 0.8192048   | 0.20 | 24.9%  |
| Mylk2   | 0.0083451   | 0.01 | 112.4% |
| Mylpf   | 0.2148586   | 0.08 | 38.2%  |
| Myn     | 2.392792    | 0.89 | 37.0%  |
| Mynn    | 3.66317     | 0.17 | 4.6%   |
| myo_10  | 0.6572928   | 0.32 | 49.4%  |
| Myo10   | 3.602882    | 0.37 | 10.2%  |

|        |             |      |        |
|--------|-------------|------|--------|
| Myo15  | 0.00783115  | 0.01 | 76.1%  |
| Myo15b | 0.004716406 | 0.01 | 142.2% |
| Myo16  | 7.73359     | 0.56 | 7.2%   |
| Myo18a | 20.53564    | 1.28 | 6.2%   |
| Myo18b | 0.017544862 | 0.01 | 70.2%  |
| Myo1a  | 0.10415954  | 0.05 | 47.4%  |
| Myo1b  | 4.035786    | 0.27 | 6.6%   |
| Myo1c  | 5.342632    | 0.27 | 5.1%   |
| Myo1d  | 0.5060142   | 0.04 | 8.7%   |
| Myo1e  | 0.776904    | 0.15 | 19.5%  |
| Myo1f  | 0.01276933  | 0.01 | 50.3%  |
| Myo1g  | 0.001424702 | 0.00 | 223.6% |
| Myo1h  | 0.04233512  | 0.02 | 56.5%  |
| Myo3a  | 0.002622504 | 0.00 | 137.3% |
| Myo3b  | 0.022676874 | 0.02 | 77.1%  |
| Myo5a  | 39.2577     | 2.58 | 6.6%   |
| Myo5b  | 1.71533     | 0.16 | 9.4%   |
| Myo5c  | 0.06560448  | 0.02 | 31.0%  |
| Myo6   | 3.601084    | 0.16 | 4.5%   |
| Myo7a  | 0.013429294 | 0.01 | 80.7%  |
| Myo7b  | 0.006745174 | 0.01 | 94.4%  |
| Myo9a  | 11.32718    | 1.09 | 9.7%   |
| Myo9b  | 5.7898      | 0.52 | 9.0%   |
| Myoc   | 0.08586268  | 0.04 | 42.4%  |
| Myocd  | 0.011295582 | 0.01 | 83.8%  |
| Myod1  | 0.0070135   | 0.01 | 139.8% |
| Myog   | 0.01656568  | 0.02 | 120.5% |
| Myohd1 | 1.639552    | 0.14 | 8.8%   |
| Myom1  | 0.12458774  | 0.06 | 47.0%  |
| Myom2  | 0.021162396 | 0.01 | 39.0%  |
| Myom3  | 0.001240796 | 0.00 | 223.6% |
| Myot   | 0           | 0.00 |        |
| Myoz1  | 0.00401704  | 0.01 | 223.6% |
| Myoz2  | 0.01646912  | 0.02 | 92.7%  |
| Myoz3  | 0           | 0.00 |        |
| Mypn   | 0.01925317  | 0.01 | 51.0%  |
| Myrip  | 9.866518    | 0.57 | 5.8%   |
| Mysm1  | 4.311994    | 0.31 | 7.1%   |
| MysPDZ | 9.58201     | 0.79 | 8.2%   |
| Myst1  | 6.9792      | 0.94 | 13.5%  |
| Myst2  | 24.98934    | 0.39 | 1.6%   |
| Myst3  | 5.595422    | 0.35 | 6.2%   |
| Myst4  | 5.95396     | 0.46 | 7.7%   |
| Myt1   | 3.033346    | 0.28 | 9.2%   |
| Myt1l  | 28.56784    | 1.36 | 4.8%   |
| Mzf1   | 1.307358    | 0.13 | 9.6%   |
| N28178 | 30.24794    | 1.12 | 3.7%   |

|           |             |       |        |
|-----------|-------------|-------|--------|
| N30.7TCRA | 0           | 0.00  |        |
| N4wbp5A   | 0.7370922   | 0.24  | 32.5%  |
| N6amt1    | 4.635544    | 0.74  | 16.0%  |
| N6amt2    | 12.0723     | 0.61  | 5.1%   |
| NAAA      | 0.2969728   | 0.20  | 69.0%  |
| Naalad2   | 0.06947728  | 0.02  | 22.7%  |
| Naaladl1  | 0.05309556  | 0.04  | 76.7%  |
| Nab1      | 4.139436    | 0.60  | 14.5%  |
| Nab2      | 1.618308    | 0.17  | 10.6%  |
| Nabp1     | 0.3434502   | 0.07  | 19.0%  |
| Naca      | 8.680308    | 0.91  | 10.5%  |
| Nact      | 0.057207022 | 0.05  | 83.2%  |
| Nadk      | 9.520986    | 0.58  | 6.1%   |
| Nadsyn1   | 1.41671     | 0.10  | 6.7%   |
| Naga      | 11.85792    | 1.17  | 9.9%   |
| Nagk      | 21.23482    | 2.70  | 12.7%  |
| Naglu     | 3.108044    | 0.22  | 7.0%   |
| Nagpa     | 1.1464612   | 0.15  | 13.5%  |
| Nags      | 0.00393898  | 0.01  | 223.6% |
| Naip1     | 0.04345266  | 0.02  | 35.3%  |
| Naip2     | 0.014353674 | 0.01  | 43.3%  |
| Naip5     | 0.01017378  | 0.01  | 80.2%  |
| Naip7     | 0.002507724 | 0.00  | 103.6% |
| NAKAP95   | 1.909598    | 0.35  | 18.4%  |
| Nalcn     | 21.53206    | 0.74  | 3.4%   |
| Nalp12    | 0.00468884  | 0.01  | 223.6% |
| Nalp1b    | 0           | 0.00  |        |
| Nalp4c    | 0.00137436  | 0.00  | 223.6% |
| Nanog     | 0.00192178  | 0.00  | 223.6% |
| Nanos1    | 7.806708    | 0.62  | 7.9%   |
| Nanos2    | 0.1950558   | 0.04  | 18.0%  |
| Nanos3    | 0.8247102   | 0.21  | 25.4%  |
| Nanp      | 0.01169212  | 0.02  | 138.7% |
| Nans      | 12.7173     | 1.14  | 9.0%   |
| Nap1l1    | 25.85762    | 1.40  | 5.4%   |
| Nap1l2    | 87.86474    | 2.72  | 3.1%   |
| Nap1l3    | 39.65446    | 2.46  | 6.2%   |
| Nap1l4    | 59.551      | 3.78  | 6.3%   |
| Nap1l5    | 454.8046    | 29.47 | 6.5%   |
| Napa      | 58.20128    | 0.89  | 1.5%   |
| Napb      | 129.5574    | 3.61  | 2.8%   |
| Napg      | 50.8092     | 1.37  | 2.7%   |
| Napor-1   | 4.427774    | 1.14  | 25.8%  |
| Naprt1    | 0.4028144   | 0.13  | 33.1%  |
| Napsa     | 0.10430136  | 0.05  | 48.5%  |
| Narf      | 16.3939     | 1.28  | 7.8%   |
| Narfl     | 6.551118    | 0.19  | 3.0%   |

|         |            |       |        |
|---------|------------|-------|--------|
| Narg1   | 14.29712   | 0.85  | 5.9%   |
| Narg1l  | 1.2253     | 0.11  | 9.3%   |
| Narg2   | 2.413488   | 0.82  | 34.2%  |
| Nars    | 91.69662   | 6.36  | 6.9%   |
| Nars2   | 3.34707    | 0.16  | 4.6%   |
| Nasp    | 11.52602   | 0.90  | 7.8%   |
| Nat1    | 0.03283516 | 0.04  | 107.6% |
| Nat10   | 6.054726   | 0.45  | 7.5%   |
| Nat11   | 9.64278    | 0.59  | 6.2%   |
| Nat12   | 13.87892   | 0.81  | 5.9%   |
| Nat13   | 24.6515    | 0.50  | 2.0%   |
| Nat14   | 9.81911    | 0.22  | 2.2%   |
| Nat2    | 0.1806411  | 0.07  | 39.6%  |
| Nat3    | 0          | 0.00  |        |
| Nat5    | 13.1453    | 1.25  | 9.5%   |
| Nat6    | 2.595244   | 0.12  | 4.7%   |
| Nat8l   | 49.89884   | 4.01  | 8.0%   |
| Nat9    | 4.541044   | 0.15  | 3.2%   |
| Nav1    | 11.36454   | 1.18  | 10.4%  |
| Nav3    | 5.440876   | 0.57  | 10.5%  |
| nbea    | 19.94912   | 2.54  | 12.7%  |
| Nbea    | 11.04706   | 0.86  | 7.8%   |
| Nbeal1  | 1.502312   | 0.27  | 18.1%  |
| Nbl1    | 4.395056   | 0.98  | 22.3%  |
| Nbn     | 4.070542   | 0.25  | 6.1%   |
| Nbr1    | 30.50564   | 1.56  | 5.1%   |
| NC8     | 0.4706112  | 0.13  | 27.1%  |
| Ncald   | 41.82994   | 0.65  | 1.6%   |
| Ncam1   | 116.4502   | 6.26  | 5.4%   |
| Ncam2   | 33.11438   | 2.81  | 8.5%   |
| Ncan    | 11.65218   | 0.28  | 2.4%   |
| Ncapd2  | 3.9308     | 0.44  | 11.1%  |
| Ncapd3  | 3.580674   | 0.16  | 4.4%   |
| Ncapg2  | 0.9735978  | 0.13  | 13.2%  |
| Ncaph   | 0.6522552  | 0.12  | 18.6%  |
| Ncaph2  | 19.73092   | 0.49  | 2.5%   |
| Ncbp2   | 19.00642   | 0.99  | 5.2%   |
| Ncdn    | 171.9668   | 12.74 | 7.4%   |
| Ncf1    | 0.6322425  | 0.49  | 77.6%  |
| Ncf2    | 0.00961241 | 0.01  | 106.8% |
| Ncf4    | 0          | 0.00  |        |
| Nck1    | 12.04132   | 0.46  | 3.8%   |
| Nck2    | 5.437166   | 0.77  | 14.2%  |
| Nckap1  | 102.3932   | 2.19  | 2.1%   |
| Nckap1l | 0.142337   | 0.01  | 8.9%   |
| Nckipsd | 13.9206    | 1.13  | 8.1%   |
| Ncl     | 40.82992   | 1.78  | 4.4%   |



|          |            |       |        |
|----------|------------|-------|--------|
| Ncln     | 16.6159    | 0.70  | 4.2%   |
| Ncoa1    | 9.528342   | 0.56  | 5.9%   |
| Ncoa2    | 8.81455    | 0.37  | 4.2%   |
| Ncoa3    | 5.490934   | 0.34  | 6.2%   |
| Ncoa4    | 0.526758   | 0.06  | 11.6%  |
| Ncoa5    | 10.374558  | 0.93  | 9.0%   |
| Ncoa6    | 5.207602   | 0.22  | 4.2%   |
| Ncoa7    | 27.42938   | 0.61  | 2.2%   |
| Ncor1    | 32.18032   | 2.24  | 7.0%   |
| Ncor2    | 9.221384   | 1.21  | 13.2%  |
| Ncr1     | 0          | 0.00  |        |
| Ncstn    | 22.35702   | 1.49  | 6.7%   |
| NCX1     | 1.0162226  | 1.53  | 150.6% |
| Ndc80    | 0.4869914  | 0.16  | 33.6%  |
| Nde1     | 5.547674   | 0.37  | 6.6%   |
| Ndel1    | 31.73222   | 1.36  | 4.3%   |
| Ndfip1   | 318.37     | 6.08  | 1.9%   |
| Ndfip2   | 56.55822   | 1.67  | 3.0%   |
| Ndg1     | 0.00703194 | 0.01  | 137.3% |
| Ndg2     | 48.4918    | 1.22  | 2.5%   |
| Ndn      | 133.9048   | 8.59  | 6.4%   |
| Ndnl2    | 9.311256   | 0.47  | 5.0%   |
| Ndor1    | 5.48908    | 0.57  | 10.5%  |
| Ndph     | 1.98758    | 0.04  | 2.0%   |
| Ndr3     | 0.02679058 | 0.01  | 47.8%  |
| Ndr1     | 14.4083    | 0.71  | 4.9%   |
| Ndr2     | 36.5546    | 3.14  | 8.6%   |
| Ndr3     | 108.608    | 1.26  | 1.2%   |
| Ndr4     | 486.8336   | 14.28 | 2.9%   |
| ndrp     | 0.414721   | 0.22  | 52.1%  |
| Ndst1    | 25.67978   | 2.36  | 9.2%   |
| Ndst2    | 3.309074   | 0.21  | 6.4%   |
| Ndst3    | 3.798496   | 0.07  | 2.0%   |
| Ndst4    | 3.43863    | 0.22  | 6.5%   |
| Ndufa1   | 61.69252   | 3.99  | 6.5%   |
| Ndufa10  | 82.26556   | 2.45  | 3.0%   |
| Ndufa11  | 65.57158   | 4.61  | 7.0%   |
| Ndufa12  | 21.73488   | 1.24  | 5.7%   |
| Ndufa12l | 11.98394   | 0.71  | 5.9%   |
| Ndufa13  | 31.82756   | 2.33  | 7.3%   |
| Ndufa2   | 52.9833    | 2.01  | 3.8%   |
| Ndufa3   | 85.49536   | 4.28  | 5.0%   |
| Ndufa4   | 156.381    | 8.55  | 5.5%   |
| Ndufa4l2 | 0.15005126 | 0.07  | 47.2%  |
| Ndufa5   | 50.08788   | 1.95  | 3.9%   |
| Ndufa6   | 93.87384   | 2.77  | 2.9%   |
| Ndufa7   | 32.82628   | 2.75  | 8.4%   |

|         |            |       |       |
|---------|------------|-------|-------|
| Ndufa8  | 65.90974   | 2.93  | 4.4%  |
| Ndufa9  | 81.02156   | 2.22  | 2.7%  |
| Ndufab1 | 3.588128   | 1.02  | 28.4% |
| Ndufaf1 | 7.44971    | 0.90  | 12.1% |
| Ndufb10 | 61.70214   | 3.20  | 5.2%  |
| Ndufb11 | 42.96854   | 1.60  | 3.7%  |
| Ndufb2  | 51.76146   | 1.53  | 2.9%  |
| Ndufb3  | 30.8271    | 2.20  | 7.1%  |
| Ndufb4  | 2.281318   | 0.55  | 24.2% |
| Ndufb5  | 85.22394   | 2.70  | 3.2%  |
| Ndufb6  | 65.55538   | 4.01  | 6.1%  |
| Ndufb7  | 41.52748   | 1.41  | 3.4%  |
| Ndufb8  | 156.1882   | 8.82  | 5.6%  |
| Ndufb9  | 141.6826   | 3.98  | 2.8%  |
| Ndufc1  | 40.09994   | 2.50  | 6.2%  |
| Ndufc2  | 77.50728   | 4.41  | 5.7%  |
| Ndufs1  | 75.11738   | 2.10  | 2.8%  |
| Ndufs2  | 105.5612   | 2.55  | 2.4%  |
| Ndufs3  | 20.92352   | 1.33  | 6.3%  |
| Ndufs4  | 45.84352   | 2.47  | 5.4%  |
| Ndufs5  | 0.17573422 | 0.08  | 43.0% |
| Ndufs6  | 19.48718   | 1.21  | 6.2%  |
| Ndufs7  | 70.10538   | 5.59  | 8.0%  |
| Ndufs8  | 71.615     | 4.33  | 6.0%  |
| Ndufv1  | 97.813     | 4.36  | 4.5%  |
| Ndufv2  | 79.00862   | 2.33  | 2.9%  |
| Neb     | 0.09368844 | 0.03  | 36.1% |
| Nubl    | 0.5766822  | 0.13  | 22.4% |
| Necap1  | 90.05032   | 2.36  | 2.6%  |
| Necap2  | 5.487404   | 0.33  | 6.0%  |
| Nedd1   | 0.8587284  | 0.15  | 17.0% |
| Nedd4   | 162.21     | 3.00  | 1.8%  |
| Nedd4l  | 8.371718   | 0.26  | 3.1%  |
| Nedd8   | 81.23308   | 4.29  | 5.3%  |
| Nedd9   | 2.943322   | 0.30  | 10.2% |
| Nedl2   | 0.1192454  | 0.03  | 28.7% |
| Nefh    | 79.42608   | 5.37  | 6.8%  |
| Nefl    | 765.079    | 50.10 | 6.5%  |
| Nefm    | 10.044324  | 0.75  | 7.5%  |
| Negr1   | 60.21512   | 1.96  | 3.3%  |
| Neil1   | 3.590744   | 0.44  | 12.3% |
| Neil2   | 0.5111476  | 0.15  | 29.7% |
| Neil3   | 0.1723657  | 0.08  | 44.8% |
| Nek1    | 7.320258   | 0.41  | 5.5%  |
| Nek10   | 0.02379408 | 0.02  | 93.9% |
| Nek11   | 0.2668314  | 0.07  | 28.0% |
| Nek2    | 0.4567338  | 0.07  | 15.8% |

|           |            |      |        |
|-----------|------------|------|--------|
| Nek3      | 0.8370718  | 0.11 | 13.6%  |
| Nek4      | 4.452336   | 0.32 | 7.3%   |
| Nek5      | 0.01731638 | 0.02 | 111.5% |
| Nek6      | 6.923824   | 0.34 | 4.9%   |
| Nek7      | 4.28222    | 0.37 | 8.7%   |
| Nek8      | 1.134292   | 0.16 | 14.4%  |
| Nek9      | 7.427284   | 0.47 | 6.4%   |
| Nelf      | 31.38024   | 1.15 | 3.7%   |
| Nelfb     | 15.84614   | 0.33 | 2.1%   |
| Nell1     | 40.92076   | 1.60 | 3.9%   |
| Nell2     | 142.1062   | 7.22 | 5.1%   |
| Nenf      | 25.85208   | 1.71 | 6.6%   |
| Neo1      | 19.53408   | 0.97 | 4.9%   |
| Nep       | 0.3608152  | 0.15 | 41.7%  |
| nepas     | 0.03187082 | 0.01 | 41.6%  |
| Nepn      | 0.7359022  | 0.18 | 23.9%  |
| Nes       | 2.667816   | 0.26 | 9.8%   |
| Net1      | 1.908612   | 0.22 | 11.3%  |
| Neto1     | 11.45752   | 0.16 | 1.4%   |
| Neto2     | 22.48286   | 1.52 | 6.7%   |
| netrin-G1 | 1.35686644 | 1.18 | 86.9%  |
| Neu1      | 17.2594    | 1.11 | 6.4%   |
| Neu2      | 0.1509452  | 0.02 | 13.2%  |
| Neu3      | 1.398908   | 0.11 | 8.2%   |
| Neu4      | 0.01687196 | 0.01 | 54.1%  |
| Neud4     | 6.933226   | 0.74 | 10.6%  |
| Neurabin  | 0.8281172  | 0.32 | 38.9%  |
| Neurl     | 9.164494   | 0.80 | 8.7%   |
| Neurl2    | 0.8596628  | 0.07 | 8.6%   |
| Neurod1   | 0.160769   | 0.01 | 8.0%   |
| Neurod2   | 0.0130685  | 0.01 | 81.0%  |
| Neurod4   | 0.12358474 | 0.07 | 53.4%  |
| Neurod6   | 0.04404454 | 0.03 | 67.0%  |
| Neurog1   | 0.0104615  | 0.01 | 95.6%  |
| Neurog2   | 0.14923818 | 0.08 | 56.3%  |
| Neurog3   | 0.00451716 | 0.01 | 223.6% |
| Nexn      | 1.830034   | 0.25 | 13.8%  |
| Nf1       | 16.79456   | 0.77 | 4.6%   |
| NF1       | 0.3960278  | 0.20 | 50.0%  |
| NF1GRP    | 0.4203522  | 0.27 | 65.3%  |
| Nf2       | 17.60486   | 1.15 | 6.5%   |
| Nfam1     | 0.02987728 | 0.01 | 46.7%  |
| Nfasc     | 19.6892    | 2.61 | 13.3%  |
| Nfat5     | 5.135774   | 0.95 | 18.5%  |
| Nfatc1    | 0.5943358  | 0.18 | 30.1%  |
| Nfatc2    | 10.179046  | 0.49 | 4.9%   |
| Nfatc2ip  | 1.199376   | 0.10 | 8.3%   |

|         |            |       |        |
|---------|------------|-------|--------|
| Nfatc3  | 1.65949    | 0.17  | 10.4%  |
| Nfatc4  | 0.7120664  | 0.20  | 28.8%  |
| Nfe2    | 0.02790272 | 0.03  | 121.7% |
| Nfe2l1  | 95.86566   | 3.46  | 3.6%   |
| Nfe2l2  | 3.737434   | 0.62  | 16.6%  |
| Nfe2l3  | 0.5948666  | 0.14  | 22.7%  |
| Nfia    | 2.57336    | 0.88  | 34.1%  |
| Nfib    | 2.405422   | 0.32  | 13.3%  |
| Nfic    | 12.42354   | 1.00  | 8.1%   |
| Nfil3   | 3.582056   | 0.26  | 7.3%   |
| Nfix    | 4.234336   | 0.29  | 6.9%   |
| Nfkb1   | 5.421332   | 0.19  | 3.5%   |
| Nfkb2   | 4.17865    | 1.70  | 40.8%  |
| Nfkbia  | 3.86952    | 0.34  | 8.7%   |
| Nfkbib  | 11.055328  | 1.21  | 10.9%  |
| Nfkbie  | 0.7903164  | 0.07  | 9.3%   |
| Nfkbil1 | 4.156628   | 0.48  | 11.5%  |
| Nfkbil2 | 4.297344   | 0.16  | 3.7%   |
| Nfkbiz  | 0.8791188  | 0.09  | 10.1%  |
| Nfrkb   | 5.57422    | 0.28  | 5.1%   |
| Nfs1    | 12.3182    | 0.70  | 5.7%   |
| Nfu1    | 10.553644  | 0.85  | 8.1%   |
| Nfx1    | 20.6862    | 0.77  | 3.7%   |
| Nfxl1   | 3.608914   | 0.39  | 10.7%  |
| Nfya    | 4.948      | 0.50  | 10.2%  |
| Nfyb    | 7.971404   | 0.32  | 4.0%   |
| Nfyc    | 4.377256   | 0.28  | 6.4%   |
| Ng23    | 0.03569336 | 0.02  | 57.3%  |
| Ngb     | 0.3333352  | 0.04  | 13.4%  |
| Ngdn    | 10.189082  | 1.02  | 10.0%  |
| Ngef    | 5.586066   | 0.19  | 3.4%   |
| Ngfb    | 0.1493868  | 0.06  | 40.0%  |
| Ngfr    | 1.51507    | 0.26  | 16.9%  |
| Ngfrap1 | 244.172    | 18.81 | 7.7%   |
| Ngly1   | 7.48428    | 1.83  | 24.4%  |
| Ngp     | 0.00716354 | 0.02  | 223.6% |
| Ngrn    | 8.181774   | 1.00  | 12.2%  |
| NHE8    | 0.02477086 | 0.02  | 61.8%  |
| Nhedc1  | 0.02064498 | 0.00  | 18.5%  |
| Nhedc2  | 0.03975356 | 0.03  | 75.5%  |
| Nhej1   | 1.1591334  | 0.21  | 17.9%  |
| Nhlh1   | 0.00354964 | 0.01  | 223.6% |
| Nhlh2   | 0.4233506  | 0.08  | 20.0%  |
| Nhlrc1  | 3.056454   | 0.33  | 10.8%  |
| Nhlrc2  | 2.031378   | 0.16  | 7.8%   |
| Nhp2l1  | 19.10742   | 1.45  | 7.6%   |
| Nhs     | 4.172266   | 0.35  | 8.5%   |

|           |            |      |        |
|-----------|------------|------|--------|
| Nhsl1     | 1.760828   | 0.14 | 7.8%   |
| ni-2      | 0.1857298  | 0.03 | 15.0%  |
| Niban     | 1.028939   | 0.13 | 12.7%  |
| Nicn1     | 48.65764   | 1.23 | 2.5%   |
| Nid1      | 19.06      | 3.53 | 18.5%  |
| Nid2      | 9.13677    | 1.72 | 18.8%  |
| Nif3l1    | 8.620232   | 2.52 | 29.3%  |
| Nin       | 1.246222   | 0.13 | 10.5%  |
| Ninj1     | 8.506944   | 0.22 | 2.6%   |
| Ninj2     | 0.00736474 | 0.02 | 223.6% |
| Nip7      | 7.095466   | 0.65 | 9.2%   |
| Nipa1     | 27.7477    | 1.96 | 7.1%   |
| Nipa2     | 14.39914   | 0.37 | 2.5%   |
| Nipbl     | 9.624862   | 0.41 | 4.2%   |
| Nipsnap1  | 32.64382   | 1.58 | 4.8%   |
| Nipsnap3a | 19.16168   | 2.50 | 13.0%  |
| NIRF      | 0.5791416  | 0.14 | 23.8%  |
| Nisch     | 107.6754   | 2.13 | 2.0%   |
| Nit1      | 9.892372   | 0.28 | 2.9%   |
| Nit2      | 8.26708    | 0.82 | 10.0%  |
| Nkap      | 7.646814   | 0.29 | 3.8%   |
| Nkapl     | 0.14089008 | 0.06 | 43.7%  |
| Nkd1      | 1.4098748  | 0.34 | 24.3%  |
| Nkd2      | 3.773182   | 0.17 | 4.5%   |
| Nkg2c     | 0          | 0.00 |        |
| Nkg7      | 0          | 0.00 |        |
| Nkiras1   | 19.98544   | 0.44 | 2.2%   |
| Nkiras2   | 17.95416   | 1.92 | 10.7%  |
| Nkpd1     | 0.1805588  | 0.05 | 25.1%  |
| Nkrf      | 27.80166   | 0.72 | 2.6%   |
| Nktr      | 15.24198   | 1.59 | 10.5%  |
| Nkx-1.2   | 0          | 0.00 |        |
| Nkx1-2    | 0          | 0.00 |        |
| Nkx2-2    | 0.4936972  | 0.11 | 21.5%  |
| Nkx2-3    | 0.05642334 | 0.03 | 55.6%  |
| Nkx2-4    | 0.00988946 | 0.01 | 138.6% |
| Nkx2-5    | 0.6398192  | 0.07 | 10.2%  |
| Nkx2-6    | 0.0051275  | 0.01 | 223.6% |
| Nkx2-9    | 0.01282066 | 0.01 | 95.1%  |
| Nkx3-1    | 0.1501386  | 0.03 | 18.0%  |
| Nkx3-2    | 0.10868298 | 0.03 | 27.6%  |
| Nkx6-1    | 0.03227444 | 0.02 | 60.4%  |
| Nkx6-2    | 0.1741512  | 0.04 | 23.7%  |
| Nkx6-3    | 0.05627642 | 0.02 | 36.3%  |
| NI1       | 0.06559552 | 0.06 | 86.9%  |
| Nle1      | 3.873336   | 0.30 | 7.8%   |
| Nlgn1     | 13.44976   | 0.41 | 3.0%   |

|         |             |      |        |
|---------|-------------|------|--------|
| Nlgn2   | 69.38652    | 3.27 | 4.7%   |
| Nlgn3   | 18.3061     | 0.39 | 2.1%   |
| Nlk     | 11.01788    | 1.05 | 9.6%   |
| Nln     | 13.183      | 2.34 | 17.7%  |
| NLP-1   | 0.1784856   | 0.05 | 27.0%  |
| Nlrc3   | 0.011788462 | 0.01 | 48.4%  |
| Nlrc4   | 0.0063083   | 0.01 | 97.5%  |
| Nlrp10  | 0.0148213   | 0.02 | 114.9% |
| Nlrp14  | 0.00297942  | 0.01 | 223.6% |
| Nlrp1a  | 0.00152064  | 0.00 | 223.6% |
| Nlrp1b  | 0           | 0.00 |        |
| Nlrp1c  | 0.001611556 | 0.00 | 223.6% |
| Nlrp2   | 0.0018906   | 0.00 | 223.6% |
| Nlrp3   | 0.010787126 | 0.01 | 73.7%  |
| Nlrp4a  | 0.00618012  | 0.01 | 140.0% |
| Nlrp4b  | 0           | 0.00 |        |
| Nlrp4c  | 0.001260404 | 0.00 | 223.6% |
| Nlrp4e  | 0           | 0.00 |        |
| Nlrp4f  | 0.0710962   | 0.04 | 49.3%  |
| Nlrp4g  | 0           | 0.00 |        |
| Nlrp5   | 0.04433346  | 0.01 | 18.2%  |
| Nlrp6   | 0.07448654  | 0.02 | 26.6%  |
| Nlrp9a  | 0.00244798  | 0.01 | 223.6% |
| Nlrp9b  | 0.09316278  | 0.04 | 43.7%  |
| Nlrp9c  | 0.00283612  | 0.01 | 223.6% |
| Nlrx1   | 0.11569448  | 0.04 | 37.7%  |
| Nm23-M7 | 0.29574534  | 0.37 | 123.5% |
| Nmb     | 0.4409536   | 0.06 | 13.6%  |
| Nmbr    | 1.26173     | 0.16 | 12.6%  |
| Nmd3    | 10.471116   | 0.56 | 5.3%   |
| Nme1    | 83.44146    | 6.58 | 7.9%   |
| Nme2    | 14.05784    | 1.10 | 7.8%   |
| Nme3    | 11.19516    | 0.64 | 5.7%   |
| Nme4    | 1.378764    | 0.29 | 21.1%  |
| Nme5    | 1.0102132   | 0.18 | 18.0%  |
| Nme6    | 1.355662    | 0.23 | 16.7%  |
| Nme7    | 23.57636    | 4.57 | 19.4%  |
| Nmi     | 0.3377754   | 0.09 | 25.7%  |
| Nmnat1  | 1.221386    | 0.11 | 9.4%   |
| Nmnat2  | 25.12158    | 0.27 | 1.1%   |
| Nmnat3  | 0.09725494  | 0.06 | 60.1%  |
| Nmral1  | 2.13397     | 0.26 | 12.2%  |
| Nms     | 0.3398986   | 0.09 | 25.2%  |
| Nmt1    | 28.17424    | 1.29 | 4.6%   |
| Nmt2    | 21.97342    | 1.70 | 7.7%   |
| Nmu     | 0.16356104  | 0.08 | 51.7%  |
| Nmur1   | 0.12054478  | 0.05 | 40.3%  |

|         |             |       |        |
|---------|-------------|-------|--------|
| Nmur2   | 0.2864554   | 0.13  | 43.6%  |
| Nna1    | 1.509096    | 0.14  | 9.2%   |
| Nnat    | 194.0114    | 36.98 | 19.1%  |
| Nnmt    | 0.04110714  | 0.03  | 79.9%  |
| Nnt     | 3.938234    | 0.31  | 7.8%   |
| Nob1    | 8.41169     | 0.67  | 8.0%   |
| Nobox   | 0.01032568  | 0.01  | 94.7%  |
| Noc3l   | 7.090914    | 0.24  | 3.4%   |
| Noc4l   | 8.362166    | 0.53  | 6.4%   |
| Nod1    | 0.3177396   | 0.06  | 17.8%  |
| Nod2    | 0.0266334   | 0.01  | 38.1%  |
| Nodal   | 0.11020256  | 0.03  | 23.9%  |
| Nog     | 3.660024    | 0.27  | 7.5%   |
| Nol1    | 9.222708    | 0.80  | 8.7%   |
| Nol10   | 7.833174    | 0.61  | 7.8%   |
| Nol11   | 10.108544   | 0.63  | 6.3%   |
| Nol12   | 7.03669     | 0.57  | 8.1%   |
| Nol14   | 11.12818    | 0.66  | 6.0%   |
| Nol3    | 5.104066    | 0.30  | 5.9%   |
| Nol4    | 5.351866    | 0.28  | 5.2%   |
| Nol5    | 16.5329     | 0.84  | 5.1%   |
| Nol5a   | 36.99226    | 2.15  | 5.8%   |
| Nol6    | 25.73044    | 0.45  | 1.8%   |
| Nol7    | 17.78272    | 0.64  | 3.6%   |
| Nol8    | 4.782416    | 0.24  | 5.1%   |
| Nol9    | 7.33464     | 0.46  | 6.3%   |
| Nola1   | 5.100494    | 0.52  | 10.2%  |
| Nola2   | 8.84409     | 1.42  | 16.1%  |
| Nola3   | 58.30586    | 0.95  | 1.6%   |
| Nolc1   | 15.06124    | 0.58  | 3.8%   |
| Nomo1   | 31.08292    | 1.34  | 4.3%   |
| Nono    | 26.3033     | 1.42  | 5.4%   |
| Nope    | 9.623632    | 0.31  | 3.2%   |
| Nos1    | 0.4862372   | 0.07  | 14.0%  |
| Nos1ap  | 5.717028    | 0.59  | 10.3%  |
| Nos2    | 0.002467444 | 0.00  | 137.4% |
| Nos3    | 0.226577    | 0.05  | 20.1%  |
| Nosip   | 16.37474    | 0.53  | 3.3%   |
| Nostrin | 0.1886728   | 0.05  | 29.1%  |
| Notch1  | 6.16146     | 2.52  | 40.8%  |
| notch1  | 4.64642216  | 2.68  | 57.7%  |
| Notch2  | 2.071784    | 0.23  | 10.9%  |
| Notch3  | 1.250456    | 0.06  | 4.8%   |
| Notch4  | 0.06331728  | 0.02  | 24.4%  |
| Noto    | 0           | 0.00  |        |
| Notum   | 0.04889182  | 0.04  | 84.6%  |
| Nov     | 0.9982532   | 0.05  | 5.4%   |

|        |             |      |        |
|--------|-------------|------|--------|
| Nova1  | 91.71542    | 3.54 | 3.9%   |
| Nova2  | 10.062782   | 0.79 | 7.9%   |
| NOX1   | 0.04724874  | 0.06 | 117.6% |
| Nox1   | 0.01489222  | 0.02 | 144.7% |
| Nox3   | 0           | 0.00 |        |
| Nox4   | 0.05754812  | 0.02 | 29.0%  |
| Noxa1  | 0           | 0.00 |        |
| Noxo1  | 0.8146636   | 0.12 | 15.2%  |
| Npal1  | 0.026856028 | 0.03 | 110.3% |
| Npal2  | 2.787       | 0.09 | 3.2%   |
| Npal3  | 30.15878    | 2.15 | 7.1%   |
| Npas1  | 3.174996    | 0.91 | 28.7%  |
| Npas2  | 0.7631738   | 0.18 | 24.0%  |
| Npas3  | 7.124592    | 0.60 | 8.4%   |
| Npas4  | 0.7797098   | 0.11 | 13.7%  |
| Npat   | 3.213258    | 0.35 | 11.0%  |
| Npb    | 0.03258228  | 0.05 | 147.7% |
| Npc1   | 7.254774    | 0.30 | 4.1%   |
| Npc111 | 0.10901016  | 0.03 | 25.7%  |
| Npc2   | 16.07968    | 0.84 | 5.2%   |
| Npcd   | 56.74714    | 6.64 | 11.7%  |
| Npdc1  | 97.40944    | 3.09 | 3.2%   |
| Npepl1 | 0.400575    | 0.08 | 20.8%  |
| Npepps | 42.91636    | 1.04 | 2.4%   |
| Npff   | 0.226381    | 0.08 | 35.6%  |
| Npffr2 | 0           | 0.00 |        |
| Nphp1  | 2.212276    | 0.26 | 11.8%  |
| Nphp3  | 2.046638    | 0.30 | 14.5%  |
| Nphp4  | 1.675502    | 0.13 | 7.8%   |
| Nphs1  | 0.0032662   | 0.00 | 141.0% |
| Nphs2  | 0.00201964  | 0.00 | 223.6% |
| Npl    | 1.0083644   | 0.20 | 19.8%  |
| Nploc4 | 22.49982    | 1.18 | 5.2%   |
| Npm1   | 27.52904    | 1.57 | 5.7%   |
| Npm2   | 0.2099754   | 0.04 | 18.8%  |
| Npm3   | 1.387374    | 0.25 | 18.1%  |
| Npnt   | 11.343058   | 1.46 | 12.9%  |
| Nppa   | 0.15265938  | 0.10 | 66.8%  |
| Nppb   | 0           | 0.00 |        |
| Nppc   | 4.409132    | 0.46 | 10.4%  |
| Npps2  | 0.416085    | 0.25 | 59.0%  |
| Npr1   | 0.5209628   | 0.04 | 7.0%   |
| Npr2   | 11.714588   | 1.89 | 16.1%  |
| Npr3   | 0.726121    | 0.13 | 17.8%  |
| Npsr1  | 0.02527302  | 0.02 | 64.8%  |
| Nptn   | 249.4432    | 5.33 | 2.1%   |
| Nptx1  | 17.44934    | 1.25 | 7.2%   |



|           |             |      |        |
|-----------|-------------|------|--------|
| Nptx2     | 18.4087     | 1.94 | 10.5%  |
| Nptxr     | 13.63156    | 1.06 | 7.8%   |
| Npvf      | 0.0301081   | 0.03 | 92.6%  |
| Npw       | 0.01030488  | 0.02 | 223.6% |
| Npy       | 19.0311     | 1.95 | 10.3%  |
| Npy1r     | 4.283164    | 0.33 | 7.8%   |
| Npy2r     | 3.576892    | 0.40 | 11.2%  |
| Npy5r     | 0.346022    | 0.10 | 30.2%  |
| Npy6r     | 0.00359926  | 0.01 | 223.6% |
| Nqo1      | 1.28388     | 0.26 | 20.1%  |
| Nqo2      | 2.44389     | 0.12 | 4.7%   |
| NR_000003 | 0.0748136   | 0.17 | 223.6% |
| NR_000004 | 0           | 0.00 |        |
| NR_000040 | 0.164248    | 0.04 | 27.2%  |
| NR_001277 | 0           | 0.00 |        |
| NR_001460 | 0.0244994   | 0.05 | 223.6% |
| NR_001461 | 0.1822086   | 0.06 | 35.0%  |
| NR_001462 | 0.00456056  | 0.01 | 223.6% |
| NR_001463 | 0.008357286 | 0.00 | 34.7%  |
| NR_001570 | 0.008183054 | 0.00 | 32.8%  |
| NR_001579 | 0.0123257   | 0.03 | 223.6% |
| NR_001582 | 0.00507292  | 0.01 | 223.6% |
| NR_001583 | 0           | 0.00 |        |
| NR_001584 | 0.00359528  | 0.01 | 223.6% |
| NR_001585 | 0.01427944  | 0.01 | 93.9%  |
| NR_001586 | 0           | 0.00 |        |
| NR_002142 | 0           | 0.00 |        |
| NR_002167 | 0.4974972   | 0.06 | 13.0%  |
| NR_002172 | 0           | 0.00 |        |
| NR_002218 | 17.19206    | 1.97 | 11.5%  |
| NR_002321 | 0.5718628   | 0.10 | 17.3%  |
| NR_002322 | 3.86032     | 0.41 | 10.6%  |
| NR_002452 | 0.001646544 | 0.00 | 223.6% |
| NR_002702 | 3.80786     | 0.68 | 17.7%  |
| NR_002839 | 0.00521422  | 0.01 | 223.6% |
| NR_002841 | 0           | 0.00 |        |
| NR_002844 | 0.060612598 | 0.04 | 69.3%  |
| NR_002846 | 0.08439586  | 0.03 | 41.0%  |
| NR_002848 | 1.9111      | 0.38 | 20.1%  |
| NR_002849 | 0           | 0.00 |        |
| NR_002851 | 0           | 0.00 |        |
| NR_002853 | 0.007602904 | 0.00 | 60.7%  |
| NR_002854 | 0.011635106 | 0.01 | 128.5% |
| NR_002855 | 0.719637    | 0.10 | 13.6%  |
| NR_002857 | 0           | 0.00 |        |
| NR_002859 | 0           | 0.00 |        |
| NR_002860 | 0.009787874 | 0.01 | 59.5%  |

|           |             |      |        |
|-----------|-------------|------|--------|
| NR_002862 | 5.853616    | 0.36 | 6.1%   |
| NR_002863 | 0.1258304   | 0.02 | 15.5%  |
| NR_002864 | 0.3018534   | 0.03 | 8.4%   |
| NR_002865 | 0           | 0.00 |        |
| NR_002866 | 0.03432274  | 0.03 | 97.3%  |
| NR_002867 | 0           | 0.00 |        |
| NR_002868 | 0           | 0.00 |        |
| NR_002869 | 0           | 0.00 |        |
| NR_002871 | 0.187172    | 0.07 | 38.4%  |
| NR_002872 | 0           | 0.00 |        |
| NR_002873 | 0.2550788   | 0.10 | 40.5%  |
| NR_002874 | 0.16912634  | 0.15 | 88.9%  |
| NR_002883 | 2.839614    | 0.27 | 9.4%   |
| NR_002886 | 38.5619     | 3.91 | 10.1%  |
| NR_002888 | 1.0747424   | 0.09 | 7.9%   |
| NR_002891 | 5.23099     | 0.51 | 9.7%   |
| NR_002893 | 0           | 0.00 |        |
| NR_002895 | 0           | 0.00 |        |
| NR_002896 | 1.64403     | 0.15 | 8.9%   |
| NR_002897 | 1.372548    | 0.46 | 33.2%  |
| NR_002899 | 0.250571    | 0.15 | 58.1%  |
| NR_002900 | 0           | 0.00 |        |
| NR_002901 | 0.1588054   | 0.22 | 138.2% |
| NR_002902 | 0.0495422   | 0.11 | 223.6% |
| NR_002903 | 0           | 0.00 |        |
| NR_002928 | 5.286082    | 0.38 | 7.2%   |
| NR_003100 | 0           | 0.00 |        |
| NR_003107 | 0.05528156  | 0.05 | 83.6%  |
| NR_003145 | 7.07271     | 0.75 | 10.6%  |
| NR_003146 | 0           | 0.00 |        |
| NR_003202 | 0           | 0.00 |        |
| NR_003243 | 0.000653066 | 0.00 | 223.6% |
| NR_003247 | 0           | 0.00 |        |
| NR_003248 | 1.925834    | 0.22 | 11.3%  |
| NR_003269 | 0           | 0.00 |        |
| NR_003270 | 7.77866     | 0.92 | 11.8%  |
| NR_003282 | 0           | 0.00 |        |
| NR_003283 | 0           | 0.00 |        |
| NR_003292 | 0.4261364   | 0.05 | 11.9%  |
| NR_003293 | 1.412176    | 0.14 | 9.7%   |
| NR_003363 | 14.08728    | 1.52 | 10.8%  |
| NR_003364 | 0.03380966  | 0.01 | 25.0%  |
| NR_003368 | 0.43704     | 0.14 | 32.7%  |
| NR_003372 | 0.02421322  | 0.03 | 104.5% |
| NR_003376 | 3.940572    | 0.29 | 7.3%   |
| NR_003519 | 29.8623     | 3.04 | 10.2%  |
| NR_003523 | 3.69932     | 0.70 | 18.9%  |

|           |             |      |        |
|-----------|-------------|------|--------|
| NR_003547 | 0           | 0.00 |        |
| NR_003557 | 24.02438    | 2.38 | 9.9%   |
| NR_003596 | 0           | 0.00 |        |
| NR_003597 | 0.000594626 | 0.00 | 138.5% |
| NR_003619 | 0.4211012   | 0.03 | 8.1%   |
| NR_003620 | 0.004221178 | 0.00 | 63.6%  |
| NR_003625 | 0.013794878 | 0.01 | 81.0%  |
| NR_003627 | 0.02154201  | 0.01 | 50.3%  |
| NR_003628 | 0.00552744  | 0.01 | 223.6% |
| NR_003629 | 0           | 0.00 |        |
| NR_003630 | 0.001280634 | 0.00 | 111.6% |
| NR_003631 | 0.2644128   | 0.04 | 15.2%  |
| NR_003632 | 0.08642446  | 0.03 | 40.5%  |
| NR_003681 | 0           | 0.00 |        |
| NR_003702 | 0           | 0.00 |        |
| NrOb1     | 0.09423504  | 0.03 | 27.1%  |
| NrOb2     | 0           | 0.00 |        |
| Nr1d1     | 9.33065     | 1.19 | 12.7%  |
| Nr1d2     | 16.59532    | 1.83 | 11.0%  |
| Nr1h2     | 11.390276   | 0.99 | 8.7%   |
| Nr1h3     | 0.2044676   | 0.04 | 18.2%  |
| Nr1h4     | 0           | 0.00 |        |
| Nr1h5     | 0           | 0.00 |        |
| Nr1i2     | 0.00709972  | 0.01 | 142.0% |
| Nr1i3     | 0.9774574   | 1.93 | 197.1% |
| Nr2c1     | 2.746768    | 0.26 | 9.5%   |
| Nr2c2     | 9.884852    | 0.74 | 7.5%   |
| Nr2e1     | 0.0796918   | 0.04 | 49.5%  |
| Nr2e3     | 0           | 0.00 |        |
| Nr2f1     | 10.8871     | 0.81 | 7.4%   |
| Nr2f2     | 3.5026      | 0.35 | 9.9%   |
| Nr2f6     | 5.68635     | 0.23 | 4.0%   |
| Nr3c1     | 5.82254     | 2.41 | 41.4%  |
| Nr3c2     | 3.986436    | 0.49 | 12.4%  |
| Nr4a1     | 1.99324     | 0.35 | 17.5%  |
| Nr4a2     | 2.126712    | 0.40 | 18.8%  |
| Nr4a3     | 0.3461484   | 0.08 | 23.3%  |
| Nr5a1     | 0.008803028 | 0.01 | 119.0% |
| Nr5a2     | 0.1266175   | 0.04 | 32.3%  |
| Nr6a1     | 1.22656     | 0.15 | 12.3%  |
| NR8       | 0.001003992 | 0.00 | 223.6% |
| Nradd     | 0.7086768   | 0.13 | 18.9%  |
| Nramp2    | 1.064929    | 0.39 | 36.8%  |
| Nrap      | 0.09859582  | 0.02 | 21.3%  |
| Nrarp     | 0.4008986   | 0.08 | 19.3%  |
| Nras      | 10.9088     | 0.68 | 6.2%   |
| Nrbf2     | 2.447654    | 0.21 | 8.5%   |

|         |            |       |        |
|---------|------------|-------|--------|
| Nrbp1   | 32.44304   | 0.65  | 2.0%   |
| Nrbp2   | 46.17996   | 2.11  | 4.6%   |
| Nrcam   | 25.2369    | 1.68  | 6.7%   |
| NrCAM   | 11.38154   | 0.71  | 6.2%   |
| Nrd1    | 22.35794   | 1.71  | 7.6%   |
| Nrf1    | 4.137152   | 0.39  | 9.4%   |
| Nrg1    | 5.867148   | 0.63  | 10.8%  |
| Nrg3    | 13.3232    | 0.54  | 4.0%   |
| Nrg4    | 0.839963   | 1.52  | 181.5% |
| Nrgn    | 2.542686   | 0.76  | 29.7%  |
| Nrip1   | 4.146452   | 0.27  | 6.6%   |
| Nrip2   | 0.6551048  | 0.21  | 31.7%  |
| Nrip3   | 30.26898   | 0.80  | 2.6%   |
| Nrk     | 1.1654278  | 0.33  | 28.3%  |
| NRK     | 0.05739668 | 0.02  | 27.6%  |
| Nrl     | 0.0672057  | 0.04  | 63.2%  |
| Nrm     | 1.3132892  | 0.30  | 22.8%  |
| Nrn1    | 148.0402   | 10.86 | 7.3%   |
| Nrn1l   | 0.7261026  | 0.31  | 42.5%  |
| Nrp     | 0.10711328 | 0.06  | 51.4%  |
| Nrp1    | 13.42908   | 0.97  | 7.3%   |
| Nrp2    | 19.67918   | 3.08  | 15.7%  |
| Nrsn1   | 45.76546   | 3.38  | 7.4%   |
| Nrsn2   | 14.59776   | 1.43  | 9.8%   |
| Nrtn    | 1.321836   | 0.33  | 25.2%  |
| Nrxn1   | 44.7362    | 1.19  | 2.7%   |
| Nrxn2   | 111.0678   | 6.68  | 6.0%   |
| Nrxn3   | 21.71548   | 0.77  | 3.6%   |
| nS7     | 4.83195    | 0.16  | 3.3%   |
| Nsbp1   | 1.622118   | 0.22  | 13.4%  |
| Nsd1    | 18.06698   | 3.63  | 20.1%  |
| Nsddr   | 0.3991218  | 0.18  | 46.2%  |
| Nsdhl   | 33.96758   | 4.16  | 12.2%  |
| Nsf     | 204.9144   | 7.17  | 3.5%   |
| Nsfl1c  | 17.90638   | 1.04  | 5.8%   |
| Nsg1    | 255.3458   | 23.04 | 9.0%   |
| Nsg2    | 181.9846   | 4.29  | 2.4%   |
| Nsl1    | 0.3500726  | 0.09  | 25.8%  |
| Nsmaf   | 11.14274   | 0.27  | 2.4%   |
| Nsmce1  | 5.49947    | 0.44  | 8.0%   |
| Nsmce2  | 12.21678   | 0.58  | 4.8%   |
| Nsmce4a | 9.910602   | 0.41  | 4.1%   |
| Nspl1   | 0.3432544  | 0.09  | 25.2%  |
| NSR1    | 1.3426262  | 0.24  | 18.1%  |
| nssr_1  | 5.001086   | 1.63  | 32.5%  |
| Nsun2   | 13.5574    | 0.79  | 5.8%   |
| Nsun3   | 3.231928   | 0.50  | 15.6%  |

|        |            |      |       |
|--------|------------|------|-------|
| Nsun4  | 5.287564   | 0.31 | 5.9%  |
| Nsun5  | 3.566322   | 0.24 | 6.8%  |
| Nsun6  | 1.829186   | 0.08 | 4.5%  |
| Nsun7  | 0.2660446  | 0.05 | 17.1% |
| Nt5c   | 16.07614   | 0.75 | 4.6%  |
| Nt5c1a | 0.1868548  | 0.07 | 35.7% |
| Nt5c1b | 0          | 0.00 |       |
| Nt5c2  | 40.26196   | 2.21 | 5.5%  |
| Nt5c3  | 22.03404   | 1.25 | 5.7%  |
| Nt5c3l | 13.85622   | 1.44 | 10.4% |
| Nt5dc1 | 0.6570586  | 0.17 | 25.6% |
| Nt5dc2 | 6.998442   | 2.05 | 29.3% |
| Nt5dc3 | 21.38952   | 1.00 | 4.7%  |
| Nt5e   | 0.7840206  | 0.21 | 26.7% |
| Nt5m   | 17.30034   | 1.13 | 6.5%  |
| Ntan1  | 21.43974   | 1.54 | 7.2%  |
| Ntf3   | 1.312142   | 0.15 | 11.3% |
| Ntf5   | 0.07744342 | 0.05 | 63.2% |
| Nthl1  | 1.0525706  | 0.14 | 13.6% |
| Ntn1   | 4.488148   | 0.15 | 3.3%  |
| Ntn2l  | 1.268898   | 0.44 | 34.8% |
| Ntn4   | 3.273432   | 0.31 | 9.3%  |
| Ntng1  | 16.87992   | 0.80 | 4.7%  |
| Ntng2  | 1.864458   | 0.34 | 18.0% |
| Ntrk2  | 43.6906    | 2.22 | 5.1%  |
| Ntrk3  | 13.00558   | 0.94 | 7.2%  |
| Nts    | 0.2539794  | 0.07 | 28.5% |
| Ntsr1  | 0.1958598  | 0.05 | 26.8% |
| Ntsr2  | 1.2705122  | 0.29 | 22.5% |
| Ntt4   | 0.3860326  | 0.09 | 22.3% |
| Nua    | 0.2261696  | 0.18 | 79.1% |
| Nuak1  | 7.054434   | 0.35 | 4.9%  |
| Nuak2  | 0.5682416  | 0.07 | 12.9% |
| Nub1   | 29.00282   | 0.44 | 1.5%  |
| Nubp1  | 5.957276   | 0.20 | 3.4%  |
| Nubp2  | 11.3869    | 1.87 | 16.4% |
| Nubpl  | 1.548148   | 0.16 | 10.1% |
| Nucb1  | 37.63036   | 0.84 | 2.2%  |
| Nucb2  | 8.739092   | 1.04 | 11.9% |
| Nucks1 | 31.13764   | 2.37 | 7.6%  |
| Nudc   | 31.18356   | 1.86 | 6.0%  |
| Nudcd1 | 8.71644    | 0.32 | 3.7%  |
| Nudcd2 | 5.257542   | 0.55 | 10.5% |
| Nudcd3 | 42.91768   | 2.87 | 6.7%  |
| Nudt1  | 3.974378   | 1.09 | 27.3% |
| Nudt10 | 8.370804   | 0.91 | 10.8% |
| Nudt11 | 16.12192   | 0.87 | 5.4%  |

|          |           |      |       |
|----------|-----------|------|-------|
| Nudt12   | 1.0411142 | 0.10 | 9.2%  |
| Nudt13   | 1.860204  | 0.03 | 1.7%  |
| Nudt14   | 5.942976  | 0.38 | 6.3%  |
| Nudt15   | 0.3322892 | 0.04 | 10.8% |
| Nudt16   | 2.933992  | 0.30 | 10.3% |
| Nudt16l1 | 16.4643   | 1.19 | 7.2%  |
| Nudt17   | 1.1469746 | 0.24 | 21.0% |
| Nudt18   | 9.164074  | 0.11 | 1.2%  |
| Nudt19   | 9.580276  | 0.61 | 6.4%  |
| Nudt2    | 10.86796  | 0.68 | 6.3%  |
| Nudt21   | 2.223094  | 0.25 | 11.0% |
| Nudt22   | 3.960516  | 0.36 | 9.2%  |
| Nudt3    | 81.56018  | 3.42 | 4.2%  |
| Nudt4    | 42.05698  | 1.76 | 4.2%  |
| Nudt5    | 6.592908  | 0.37 | 5.6%  |
| Nudt6    | 0.8242052 | 0.11 | 13.3% |
| Nudt7    | 1.383574  | 0.11 | 8.2%  |
| Nudt8    | 4.299692  | 0.71 | 16.5% |
| Nudt9    | 10.089046 | 0.66 | 6.5%  |
| Nuf2     | 0.755071  | 0.29 | 38.5% |
| Nufip1   | 4.13813   | 0.26 | 6.3%  |
| Nufip2   | 11.30936  | 0.58 | 5.1%  |
| Numa1    | 7.869486  | 0.87 | 11.0% |
| Numb     | 3.678412  | 0.47 | 12.8% |
| Numbl    | 28.809    | 1.66 | 5.8%  |
| Nup107   | 4.849598  | 0.18 | 3.8%  |
| Nup133   | 8.707616  | 0.23 | 2.7%  |
| Nup153   | 12.65046  | 0.56 | 4.4%  |
| Nup155   | 8.104944  | 0.56 | 6.9%  |
| Nup160   | 3.05167   | 0.26 | 8.4%  |
| Nup188   | 6.096736  | 0.13 | 2.1%  |
| Nup205   | 3.380622  | 0.26 | 7.8%  |
| Nup210   | 3.381524  | 0.14 | 4.0%  |
| Nup214   | 5.575404  | 0.09 | 1.7%  |
| Nup35    | 1.2396952 | 0.34 | 27.1% |
| Nup37    | 1.885858  | 0.21 | 11.3% |
| Nup43    | 3.600568  | 0.32 | 9.0%  |
| Nup50    | 10.98684  | 0.39 | 3.5%  |
| Nup54    | 4.79179   | 0.30 | 6.4%  |
| Nup62    | 11.086102 | 1.10 | 10.0% |
| Nup85    | 8.937186  | 0.31 | 3.5%  |
| Nup88    | 19.05756  | 0.61 | 3.2%  |
| Nup93    | 9.762954  | 0.16 | 1.7%  |
| Nup98    | 10.93784  | 0.67 | 6.1%  |
| Nupl1    | 18.7987   | 0.77 | 4.1%  |
| Nupl2    | 1.774278  | 0.20 | 11.4% |
| Nupr1    | 1.205748  | 0.10 | 8.2%  |

|        |             |      |        |
|--------|-------------|------|--------|
| Nus1   | 21.89886    | 1.31 | 6.0%   |
| Nusap1 | 1.284556    | 0.20 | 15.5%  |
| Nut    | 0.02742024  | 0.01 | 30.1%  |
| Nutf2  | 8.065578    | 0.23 | 2.8%   |
| Nvl    | 10.741536   | 0.91 | 8.5%   |
| Nwd1   | 3.37644     | 0.19 | 5.5%   |
| Nxf1   | 16.34924    | 1.04 | 6.3%   |
| Nxf2   | 0.0336543   | 0.03 | 84.2%  |
| Nxf3   | 0.6829306   | 0.10 | 14.9%  |
| Nxf7   | 0.38922     | 0.19 | 49.0%  |
| Nxn    | 3.654984    | 0.45 | 12.2%  |
| Nxn1   | 0.02050046  | 0.02 | 90.3%  |
| Nxn2   | 0.19441434  | 0.14 | 70.9%  |
| Nxph1  | 20.71704    | 1.00 | 4.8%   |
| Nxph2  | 0.3389282   | 0.09 | 27.7%  |
| Nxph3  | 0.23047     | 0.04 | 17.5%  |
| Nxph4  | 1.36097     | 0.19 | 14.0%  |
| Nxt1   | 2.62228     | 0.18 | 6.9%   |
| Nxt2   | 11.43744    | 1.10 | 9.6%   |
| Nyx    | 0.09221316  | 0.02 | 26.5%  |
| O/E-4S | 0.6110724   | 0.19 | 30.5%  |
| Oaf    | 2.29142     | 0.34 | 15.0%  |
| Oas1a  | 0.0196715   | 0.02 | 78.3%  |
| Oas1b  | 0.20510032  | 0.08 | 40.0%  |
| Oas1c  | 0.6564568   | 0.12 | 18.7%  |
| Oas1d  | 0           | 0.00 |        |
| Oas1e  | 0.03086054  | 0.02 | 50.0%  |
| Oas1f  | 0           | 0.00 |        |
| Oas1g  | 0.00850788  | 0.01 | 139.8% |
| Oas1h  | 0           | 0.00 |        |
| Oas2   | 0.009548604 | 0.01 | 129.6% |
| Oas3   | 0.006109704 | 0.00 | 72.6%  |
| oasl1  | 0.06883734  | 0.03 | 47.1%  |
| Oasl1  | 0.01675318  | 0.01 | 71.3%  |
| oasl10 | 0.00093833  | 0.00 | 223.6% |
| oasl11 | 0.001062035 | 0.00 | 207.8% |
| Oasl2  | 0.3372664   | 0.07 | 20.3%  |
| Oat    | 30.24216    | 0.66 | 2.2%   |
| Oaz1   | 8.792516    | 0.61 | 7.0%   |
| Oaz2   | 41.39284    | 1.12 | 2.7%   |
| Oaz3   | 0.10493982  | 0.03 | 32.1%  |
| Ob1    | 25.50836    | 2.92 | 11.5%  |
| Obfc1  | 4.855262    | 0.54 | 11.2%  |
| Obfc2a | 2.213308    | 0.15 | 6.7%   |
| Obfc2b | 29.47928    | 3.55 | 12.0%  |
| Obox1  | 0.00935724  | 0.01 | 137.7% |
| Obox3  | 0           | 0.00 |        |

|         |             |       |        |
|---------|-------------|-------|--------|
| Obox5   | 0.01937904  | 0.01  | 58.3%  |
| Obox6   | 0           | 0.00  |        |
| Obp1a   | 0           | 0.00  |        |
| Obscn   | 0.012270114 | 0.01  | 116.2% |
| Obsl1   | 4.054936    | 0.41  | 10.2%  |
| Oc90    | 0.00939616  | 0.02  | 223.6% |
| Ocel1   | 4.152286    | 0.17  | 4.1%   |
| Ociad1  | 184.7576    | 3.68  | 2.0%   |
| Ociad2  | 8.42206     | 0.46  | 5.5%   |
| Ocln    | 0.4107526   | 0.06  | 14.8%  |
| Ocm     | 0.03041024  | 0.03  | 96.9%  |
| Ocrl    | 21.38204    | 0.87  | 4.1%   |
| Odam    | 0           | 0.00  |        |
| Odc1    | 2.999946    | 0.41  | 13.6%  |
| Odf1    | 0.01269832  | 0.02  | 137.8% |
| Odf2    | 15.26274    | 0.60  | 4.0%   |
| Odf2l   | 2.070372    | 0.22  | 10.7%  |
| Odf3    | 0           | 0.00  |        |
| Odf3l1  | 0.09987786  | 0.02  | 19.9%  |
| Odf4    | 0.05222204  | 0.01  | 23.8%  |
| Odz1    | 2.888488    | 0.57  | 19.8%  |
| Odz2    | 9.892058    | 0.38  | 3.8%   |
| Odz3    | 9.421692    | 0.49  | 5.2%   |
| Odz4    | 5.33077     | 0.46  | 8.7%   |
| Ofcc1   | 0           | 0.00  |        |
| Ofd1    | 2.451894    | 0.14  | 5.7%   |
| Ogdh    | 31.78668    | 0.61  | 1.9%   |
| Ogdhl   | 30.25692    | 0.94  | 3.1%   |
| Ogfod1  | 16.62468    | 3.13  | 18.8%  |
| Ogfod2  | 9.08144     | 0.56  | 6.1%   |
| Ogfr    | 18.87746    | 1.45  | 7.7%   |
| Ogfrl1  | 10.436068   | 0.39  | 3.8%   |
| Ogg1    | 2.100634    | 0.15  | 7.4%   |
| Ogn     | 6.730606    | 1.30  | 19.3%  |
| Ogt     | 49.55912    | 6.67  | 13.5%  |
| Oip5    | 0.7815462   | 0.28  | 35.4%  |
| Oit1    | 0.042054    | 0.02  | 58.3%  |
| Oit3    | 0.00877806  | 0.01  | 97.4%  |
| Ola1    | 34.37844    | 1.17  | 3.4%   |
| Olah    | 0           | 0.00  |        |
| Olfm1   | 144.18      | 14.72 | 10.2%  |
| Olfm2   | 43.69386    | 4.87  | 11.2%  |
| Olfm3   | 21.7653     | 1.26  | 5.8%   |
| Olfm4   | 0.0744592   | 0.07  | 95.8%  |
| Olfml1  | 1.3106672   | 0.39  | 29.6%  |
| Olfml2a | 0.0571574   | 0.02  | 35.5%  |
| Olfml2b | 0.4474358   | 0.04  | 9.9%   |



|          |            |      |       |
|----------|------------|------|-------|
| Olfml3   | 2.294186   | 0.61 | 26.5% |
| Olfr1    | 0          | 0.00 |       |
| Olfr10   | 0          | 0.00 |       |
| Olfr100  | 0          | 0.00 |       |
| Olfr1000 | 0          | 0.00 |       |
| Olfr1002 | 0          | 0.00 |       |
| Olfr1006 | 0          | 0.00 |       |
| Olfr1008 | 0          | 0.00 |       |
| Olfr1009 | 0          | 0.00 |       |
| Olfr101  | 0          | 0.00 |       |
| Olfr1010 | 0          | 0.00 |       |
| Olfr1012 | 0          | 0.00 |       |
| Olfr1013 | 0          | 0.00 |       |
| Olfr1014 | 0          | 0.00 |       |
| Olfr1015 | 0          | 0.00 |       |
| Olfr1016 | 0          | 0.00 |       |
| Olfr1018 | 0          | 0.00 |       |
| Olfr1019 | 0          | 0.00 |       |
| Olfr1020 | 0          | 0.00 |       |
| Olfr1022 | 0          | 0.00 |       |
| Olfr1023 | 0          | 0.00 |       |
| Olfr1024 | 0          | 0.00 |       |
| Olfr1026 | 0          | 0.00 |       |
| Olfr1028 | 0          | 0.00 |       |
| Olfr1029 | 0          | 0.00 |       |
| Olfr103  | 0          | 0.00 |       |
| Olfr1030 | 0          | 0.00 |       |
| Olfr1031 | 0          | 0.00 |       |
| Olfr1032 | 0          | 0.00 |       |
| Olfr1033 | 0.05191004 | 0.02 | 39.1% |
| Olfr1034 | 0          | 0.00 |       |
| Olfr1036 | 0          | 0.00 |       |
| Olfr1037 | 0          | 0.00 |       |
| Olfr1038 | 0          | 0.00 |       |
| Olfr1039 | 0          | 0.00 |       |
| Olfr104  | 0          | 0.00 |       |
| Olfr1040 | 0          | 0.00 |       |
| Olfr1042 | 0          | 0.00 |       |
| Olfr1043 | 0          | 0.00 |       |
| Olfr1044 | 0          | 0.00 |       |
| Olfr1045 | 0          | 0.00 |       |
| Olfr1046 | 0          | 0.00 |       |
| Olfr1047 | 0          | 0.00 |       |
| Olfr1048 | 0          | 0.00 |       |
| Olfr1049 | 0          | 0.00 |       |
| Olfr105  | 0          | 0.00 |       |
| Olfr1051 | 0          | 0.00 |       |

|          |            |      |        |
|----------|------------|------|--------|
| Olfr1052 | 0          | 0.00 |        |
| Olfr1054 | 0          | 0.00 |        |
| Olfr1055 | 0          | 0.00 |        |
| Olfr1056 | 0          | 0.00 |        |
| Olfr1057 | 0          | 0.00 |        |
| Olfr1058 | 0          | 0.00 |        |
| Olfr106  | 0          | 0.00 |        |
| Olfr1061 | 0          | 0.00 |        |
| Olfr1062 | 0          | 0.00 |        |
| Olfr1065 | 0          | 0.00 |        |
| Olfr1066 | 0          | 0.00 |        |
| Olfr107  | 0          | 0.00 |        |
| Olfr1076 | 0          | 0.00 |        |
| Olfr1079 | 0          | 0.00 |        |
| Olfr108  | 0          | 0.00 |        |
| Olfr1080 | 0          | 0.00 |        |
| Olfr1082 | 0          | 0.00 |        |
| Olfr1083 | 0          | 0.00 |        |
| Olfr1084 | 0.01304904 | 0.03 | 223.6% |
| Olfr1085 | 0          | 0.00 |        |
| Olfr1086 | 0          | 0.00 |        |
| Olfr1087 | 0          | 0.00 |        |
| Olfr1089 | 0          | 0.00 |        |
| Olfr109  | 0          | 0.00 |        |
| Olfr1090 | 0          | 0.00 |        |
| Olfr1093 | 0          | 0.00 |        |
| Olfr1094 | 0          | 0.00 |        |
| Olfr1095 | 0          | 0.00 |        |
| Olfr1097 | 0          | 0.00 |        |
| Olfr1098 | 0          | 0.00 |        |
| Olfr1099 | 0          | 0.00 |        |
| Olfr11   | 0          | 0.00 |        |
| Olfr110  | 0          | 0.00 |        |
| Olfr1100 | 0          | 0.00 |        |
| Olfr1101 | 0          | 0.00 |        |
| Olfr1102 | 0          | 0.00 |        |
| Olfr1104 | 0          | 0.00 |        |
| Olfr1105 | 0          | 0.00 |        |
| Olfr1106 | 0          | 0.00 |        |
| Olfr1107 | 0          | 0.00 |        |
| Olfr1109 | 0          | 0.00 |        |
| Olfr111  | 0          | 0.00 |        |
| Olfr1110 | 0          | 0.00 |        |
| Olfr1111 | 0          | 0.00 |        |
| Olfr1112 | 0          | 0.00 |        |
| Olfr1113 | 0          | 0.00 |        |
| Olfr1115 | 0          | 0.00 |        |

|          |   |      |  |
|----------|---|------|--|
| Olfr1116 | 0 | 0.00 |  |
| Olfr1118 | 0 | 0.00 |  |
| Olfr112  | 0 | 0.00 |  |
| Olfr1120 | 0 | 0.00 |  |
| Olfr1121 | 0 | 0.00 |  |
| Olfr1122 | 0 | 0.00 |  |
| Olfr1123 | 0 | 0.00 |  |
| Olfr1125 | 0 | 0.00 |  |
| Olfr1126 | 0 | 0.00 |  |
| Olfr1128 | 0 | 0.00 |  |
| Olfr1129 | 0 | 0.00 |  |
| Olfr113  | 0 | 0.00 |  |
| Olfr1130 | 0 | 0.00 |  |
| Olfr1131 | 0 | 0.00 |  |
| Olfr1132 | 0 | 0.00 |  |
| Olfr1133 | 0 | 0.00 |  |
| Olfr1134 | 0 | 0.00 |  |
| Olfr1135 | 0 | 0.00 |  |
| Olfr1136 | 0 | 0.00 |  |
| Olfr1137 | 0 | 0.00 |  |
| Olfr1138 | 0 | 0.00 |  |
| Olfr114  | 0 | 0.00 |  |
| Olfr1140 | 0 | 0.00 |  |
| Olfr1141 | 0 | 0.00 |  |
| Olfr1143 | 0 | 0.00 |  |
| Olfr1145 | 0 | 0.00 |  |
| Olfr1148 | 0 | 0.00 |  |
| Olfr115  | 0 | 0.00 |  |
| Olfr1151 | 0 | 0.00 |  |
| Olfr1152 | 0 | 0.00 |  |
| Olfr1153 | 0 | 0.00 |  |
| Olfr1154 | 0 | 0.00 |  |
| Olfr1155 | 0 | 0.00 |  |
| Olfr1156 | 0 | 0.00 |  |
| Olfr1157 | 0 | 0.00 |  |
| Olfr1158 | 0 | 0.00 |  |
| Olfr116  | 0 | 0.00 |  |
| Olfr1160 | 0 | 0.00 |  |
| Olfr1161 | 0 | 0.00 |  |
| Olfr1162 | 0 | 0.00 |  |
| Olfr1163 | 0 | 0.00 |  |
| Olfr1164 | 0 | 0.00 |  |
| Olfr1165 | 0 | 0.00 |  |
| Olfr1166 | 0 | 0.00 |  |
| Olfr1167 | 0 | 0.00 |  |
| Olfr1168 | 0 | 0.00 |  |
| Olfr117  | 0 | 0.00 |  |

|          |            |      |        |
|----------|------------|------|--------|
| Olfr1170 | 0          | 0.00 |        |
| Olfr1173 | 0          | 0.00 |        |
| Olfr1176 | 0          | 0.00 |        |
| Olfr1178 | 0          | 0.00 |        |
| Olfr1179 | 0          | 0.00 |        |
| Olfr118  | 0          | 0.00 |        |
| Olfr1180 | 0          | 0.00 |        |
| Olfr1181 | 0          | 0.00 |        |
| Olfr1182 | 0          | 0.00 |        |
| Olfr1183 | 0          | 0.00 |        |
| Olfr1184 | 0          | 0.00 |        |
| Olfr1186 | 0          | 0.00 |        |
| Olfr1188 | 0          | 0.00 |        |
| Olfr1189 | 0          | 0.00 |        |
| Olfr119  | 0          | 0.00 |        |
| Olfr1193 | 0          | 0.00 |        |
| Olfr1195 | 0          | 0.00 |        |
| Olfr1196 | 0          | 0.00 |        |
| Olfr1197 | 0          | 0.00 |        |
| Olfr1198 | 0.0128426  | 0.03 | 223.6% |
| Olfr1199 | 0          | 0.00 |        |
| Olfr12   | 0          | 0.00 |        |
| Olfr120  | 0          | 0.00 |        |
| Olfr1200 | 0          | 0.00 |        |
| Olfr1201 | 0          | 0.00 |        |
| Olfr1202 | 0          | 0.00 |        |
| Olfr1203 | 0          | 0.00 |        |
| Olfr1204 | 0          | 0.00 |        |
| Olfr1206 | 0          | 0.00 |        |
| Olfr1208 | 0          | 0.00 |        |
| Olfr1209 | 0          | 0.00 |        |
| Olfr121  | 0          | 0.00 |        |
| Olfr1211 | 0          | 0.00 |        |
| Olfr1212 | 0          | 0.00 |        |
| Olfr1213 | 0          | 0.00 |        |
| Olfr1214 | 0          | 0.00 |        |
| Olfr1215 | 0          | 0.00 |        |
| Olfr1216 | 0          | 0.00 |        |
| Olfr1217 | 0          | 0.00 |        |
| Olfr1218 | 0.01208698 | 0.03 | 223.6% |
| Olfr1219 | 0          | 0.00 |        |
| Olfr122  | 0          | 0.00 |        |
| Olfr1220 | 0          | 0.00 |        |
| Olfr1221 | 0          | 0.00 |        |
| Olfr1222 | 0          | 0.00 |        |
| Olfr1223 | 0          | 0.00 |        |
| Olfr1225 | 0          | 0.00 |        |

|          |   |      |  |
|----------|---|------|--|
| Olfr1226 | 0 | 0.00 |  |
| Olfr1228 | 0 | 0.00 |  |
| Olfr1229 | 0 | 0.00 |  |
| Olfr123  | 0 | 0.00 |  |
| Olfr1230 | 0 | 0.00 |  |
| Olfr1231 | 0 | 0.00 |  |
| Olfr1232 | 0 | 0.00 |  |
| Olfr1233 | 0 | 0.00 |  |
| Olfr1234 | 0 | 0.00 |  |
| Olfr1238 | 0 | 0.00 |  |
| Olfr1239 | 0 | 0.00 |  |
| Olfr124  | 0 | 0.00 |  |
| Olfr1240 | 0 | 0.00 |  |
| Olfr1241 | 0 | 0.00 |  |
| Olfr1242 | 0 | 0.00 |  |
| Olfr1243 | 0 | 0.00 |  |
| Olfr1245 | 0 | 0.00 |  |
| Olfr1246 | 0 | 0.00 |  |
| Olfr1247 | 0 | 0.00 |  |
| Olfr1248 | 0 | 0.00 |  |
| Olfr1249 | 0 | 0.00 |  |
| Olfr125  | 0 | 0.00 |  |
| Olfr1250 | 0 | 0.00 |  |
| Olfr1251 | 0 | 0.00 |  |
| Olfr1252 | 0 | 0.00 |  |
| Olfr1254 | 0 | 0.00 |  |
| Olfr1255 | 0 | 0.00 |  |
| Olfr1256 | 0 | 0.00 |  |
| Olfr1257 | 0 | 0.00 |  |
| Olfr1258 | 0 | 0.00 |  |
| Olfr1259 | 0 | 0.00 |  |
| Olfr126  | 0 | 0.00 |  |
| Olfr1260 | 0 | 0.00 |  |
| Olfr1261 | 0 | 0.00 |  |
| Olfr1262 | 0 | 0.00 |  |
| Olfr1263 | 0 | 0.00 |  |
| Olfr1264 | 0 | 0.00 |  |
| Olfr1265 | 0 | 0.00 |  |
| Olfr1269 | 0 | 0.00 |  |
| Olfr127  | 0 | 0.00 |  |
| Olfr1270 | 0 | 0.00 |  |
| Olfr1271 | 0 | 0.00 |  |
| Olfr1272 | 0 | 0.00 |  |
| Olfr1273 | 0 | 0.00 |  |
| Olfr1274 | 0 | 0.00 |  |
| Olfr1275 | 0 | 0.00 |  |
| Olfr1276 | 0 | 0.00 |  |

|              |            |      |        |
|--------------|------------|------|--------|
| Olfr1277     | 0          | 0.00 |        |
| Olfr1278     | 0          | 0.00 |        |
| Olfr1279     | 0          | 0.00 |        |
| Olfr128      | 0          | 0.00 |        |
| Olfr1280     | 0          | 0.00 |        |
| Olfr1281     | 0          | 0.00 |        |
| Olfr1282     | 0          | 0.00 |        |
| Olfr1283     | 0          | 0.00 |        |
| Olfr1284     | 0          | 0.00 |        |
| Olfr1286     | 0          | 0.00 |        |
| Olfr1287     | 0          | 0.00 |        |
| Olfr1288     | 0          | 0.00 |        |
| Olfr1289     | 0          | 0.00 |        |
| Olfr129      | 0          | 0.00 |        |
| Olfr1290     | 0          | 0.00 |        |
| Olfr1294     | 0          | 0.00 |        |
| Olfr1295     | 0          | 0.00 |        |
| Olfr1297     | 0          | 0.00 |        |
| Olfr1298     | 0          | 0.00 |        |
| Olfr1299     | 0          | 0.00 |        |
| Olfr13       | 0          | 0.00 |        |
| Olfr130      | 0          | 0.00 |        |
| Olfr1300-ps1 | 0          | 0.00 |        |
| Olfr1301     | 0          | 0.00 |        |
| Olfr1302     | 0          | 0.00 |        |
| Olfr1303     | 0          | 0.00 |        |
| Olfr1305     | 0.01249114 | 0.03 | 223.6% |
| Olfr1306     | 0          | 0.00 |        |
| Olfr1307     | 0          | 0.00 |        |
| Olfr1308     | 0          | 0.00 |        |
| Olfr1309     | 0.00765672 | 0.02 | 223.6% |
| Olfr131      | 0.01706236 | 0.04 | 223.6% |
| Olfr1310     | 0          | 0.00 |        |
| Olfr1311     | 0          | 0.00 |        |
| Olfr1312     | 0          | 0.00 |        |
| Olfr1313     | 0          | 0.00 |        |
| Olfr1314     | 0.03358884 | 0.03 | 93.8%  |
| Olfr1316     | 0          | 0.00 |        |
| Olfr1317     | 0          | 0.00 |        |
| Olfr1318     | 0.00844104 | 0.02 | 223.6% |
| Olfr132      | 0          | 0.00 |        |
| Olfr1320     | 0          | 0.00 |        |
| Olfr1321     | 0          | 0.00 |        |
| Olfr1322     | 0          | 0.00 |        |
| Olfr1323     | 0          | 0.00 |        |
| Olfr1324     | 0          | 0.00 |        |
| Olfr1325     | 0          | 0.00 |        |

|              |            |      |        |
|--------------|------------|------|--------|
| Olfr1328     | 0          | 0.00 |        |
| Olfr1329     | 0          | 0.00 |        |
| Olfr133      | 0          | 0.00 |        |
| Olfr1330     | 0          | 0.00 |        |
| Olfr1331     | 0          | 0.00 |        |
| Olfr1333     | 0          | 0.00 |        |
| Olfr1335     | 0          | 0.00 |        |
| Olfr1336     | 0          | 0.00 |        |
| Olfr1337     | 0          | 0.00 |        |
| Olfr1338     | 0          | 0.00 |        |
| Olfr1339     | 0          | 0.00 |        |
| Olfr134      | 0          | 0.00 |        |
| Olfr1340     | 0          | 0.00 |        |
| Olfr1341     | 0          | 0.00 |        |
| Olfr1342     | 0          | 0.00 |        |
| Olfr1344     | 0.698644   | 0.17 | 24.1%  |
| Olfr1346     | 0          | 0.00 |        |
| Olfr1347     | 0          | 0.00 |        |
| Olfr1348     | 0          | 0.00 |        |
| Olfr1349     | 0          | 0.00 |        |
| Olfr135      | 0          | 0.00 |        |
| Olfr1350     | 0.00841052 | 0.02 | 223.6% |
| Olfr1351     | 0          | 0.00 |        |
| Olfr1352     | 0          | 0.00 |        |
| Olfr1353     | 0          | 0.00 |        |
| Olfr1355     | 0          | 0.00 |        |
| Olfr1356     | 0          | 0.00 |        |
| Olfr1357     | 0          | 0.00 |        |
| Olfr1359     | 0.00949002 | 0.02 | 223.6% |
| Olfr136      | 0          | 0.00 |        |
| Olfr1360     | 0          | 0.00 |        |
| Olfr1361     | 0          | 0.00 |        |
| Olfr1362     | 0          | 0.00 |        |
| Olfr1364     | 0          | 0.00 |        |
| Olfr1365     | 0          | 0.00 |        |
| Olfr1366     | 0          | 0.00 |        |
| Olfr1367     | 0          | 0.00 |        |
| Olfr1368     | 0          | 0.00 |        |
| Olfr137      | 0          | 0.00 |        |
| Olfr1370     | 0          | 0.00 |        |
| Olfr1371     | 0.01298338 | 0.03 | 223.6% |
| Olfr1372-ps1 | 0.07039114 | 0.03 | 45.6%  |
| Olfr1373     | 0          | 0.00 |        |
| Olfr1377     | 0          | 0.00 |        |
| Olfr1378     | 0          | 0.00 |        |
| Olfr138      | 0          | 0.00 |        |
| Olfr1380     | 0          | 0.00 |        |

|          |            |      |        |
|----------|------------|------|--------|
| Olfr1381 | 0          | 0.00 |        |
| Olfr1382 | 0          | 0.00 |        |
| Olfr1383 | 0          | 0.00 |        |
| Olfr1384 | 0          | 0.00 |        |
| Olfr1385 | 0          | 0.00 |        |
| Olfr1386 | 0          | 0.00 |        |
| Olfr1387 | 0          | 0.00 |        |
| Olfr1388 | 0          | 0.00 |        |
| Olfr1389 | 0.00648112 | 0.01 | 223.6% |
| Olfr139  | 0          | 0.00 |        |
| Olfr1390 | 0          | 0.00 |        |
| Olfr1391 | 0          | 0.00 |        |
| Olfr1392 | 0.00679402 | 0.02 | 223.6% |
| Olfr1393 | 0.0087289  | 0.02 | 223.6% |
| Olfr1394 | 0          | 0.00 |        |
| Olfr1395 | 0          | 0.00 |        |
| Olfr1396 | 0          | 0.00 |        |
| Olfr140  | 0          | 0.00 |        |
| Olfr1402 | 0          | 0.00 |        |
| Olfr1403 | 0          | 0.00 |        |
| Olfr1404 | 0          | 0.00 |        |
| Olfr1406 | 0          | 0.00 |        |
| Olfr1408 | 0          | 0.00 |        |
| Olfr141  | 0.00897148 | 0.02 | 223.6% |
| Olfr1410 | 0          | 0.00 |        |
| Olfr1411 | 0          | 0.00 |        |
| Olfr1412 | 0          | 0.00 |        |
| Olfr1413 | 0          | 0.00 |        |
| Olfr1414 | 0.00619424 | 0.01 | 223.6% |
| Olfr1415 | 0          | 0.00 |        |
| Olfr1416 | 0          | 0.00 |        |
| Olfr1417 | 0.11980478 | 0.05 | 39.0%  |
| Olfr1418 | 0          | 0.00 |        |
| Olfr1419 | 0.01318826 | 0.02 | 137.2% |
| Olfr142  | 0          | 0.00 |        |
| Olfr1420 | 0.01513468 | 0.03 | 223.6% |
| Olfr1423 | 0          | 0.00 |        |
| Olfr1424 | 0          | 0.00 |        |
| Olfr1425 | 0          | 0.00 |        |
| Olfr1426 | 0          | 0.00 |        |
| Olfr1427 | 0          | 0.00 |        |
| Olfr1428 | 0          | 0.00 |        |
| Olfr143  | 0          | 0.00 |        |
| Olfr1431 | 0          | 0.00 |        |
| Olfr1434 | 0          | 0.00 |        |
| Olfr1436 | 0          | 0.00 |        |
| Olfr1437 | 0          | 0.00 |        |



|          |            |      |        |
|----------|------------|------|--------|
| Olfr144  | 0          | 0.00 |        |
| Olfr1440 | 0          | 0.00 |        |
| Olfr1441 | 0          | 0.00 |        |
| Olfr1442 | 0.01099144 | 0.02 | 223.6% |
| Olfr1443 | 0          | 0.00 |        |
| Olfr1444 | 0          | 0.00 |        |
| Olfr1445 | 0          | 0.00 |        |
| Olfr1446 | 0          | 0.00 |        |
| Olfr1447 | 0.00891396 | 0.02 | 223.6% |
| Olfr1448 | 0          | 0.00 |        |
| Olfr1449 | 0          | 0.00 |        |
| Olfr145  | 0          | 0.00 |        |
| Olfr1450 | 0          | 0.00 |        |
| Olfr1451 | 0          | 0.00 |        |
| Olfr1453 | 0          | 0.00 |        |
| Olfr1454 | 0          | 0.00 |        |
| Olfr1457 | 0          | 0.00 |        |
| Olfr1459 | 0          | 0.00 |        |
| Olfr146  | 0          | 0.00 |        |
| Olfr1461 | 0          | 0.00 |        |
| Olfr1462 | 0          | 0.00 |        |
| Olfr1463 | 0          | 0.00 |        |
| Olfr1465 | 0          | 0.00 |        |
| Olfr1466 | 0          | 0.00 |        |
| Olfr1467 | 0          | 0.00 |        |
| Olfr1469 | 0          | 0.00 |        |
| Olfr147  | 0.00846608 | 0.02 | 223.6% |
| Olfr1471 | 0          | 0.00 |        |
| Olfr1472 | 0          | 0.00 |        |
| Olfr1474 | 0          | 0.00 |        |
| Olfr1475 | 0          | 0.00 |        |
| Olfr1477 | 0          | 0.00 |        |
| Olfr148  | 0.00851548 | 0.02 | 223.6% |
| Olfr1480 | 0          | 0.00 |        |
| Olfr1484 | 0          | 0.00 |        |
| Olfr1487 | 0          | 0.00 |        |
| Olfr1489 | 0          | 0.00 |        |
| Olfr149  | 0          | 0.00 |        |
| Olfr1490 | 0          | 0.00 |        |
| Olfr1491 | 0          | 0.00 |        |
| Olfr1494 | 0          | 0.00 |        |
| Olfr1495 | 0          | 0.00 |        |
| Olfr1496 | 0          | 0.00 |        |
| Olfr1497 | 0          | 0.00 |        |
| Olfr1499 | 0          | 0.00 |        |
| Olfr15   | 0          | 0.00 |        |
| Olfr1500 | 0          | 0.00 |        |

|          |            |      |        |
|----------|------------|------|--------|
| Olfr1501 | 0          | 0.00 |        |
| Olfr1502 | 0          | 0.00 |        |
| Olfr1504 | 0          | 0.00 |        |
| Olfr1505 | 0          | 0.00 |        |
| Olfr1507 | 0          | 0.00 |        |
| Olfr1508 | 0          | 0.00 |        |
| Olfr1509 | 0          | 0.00 |        |
| Olfr151  | 0          | 0.00 |        |
| Olfr1510 | 0          | 0.00 |        |
| Olfr1511 | 0          | 0.00 |        |
| Olfr1512 | 0          | 0.00 |        |
| Olfr1513 | 0          | 0.00 |        |
| Olfr1514 | 0          | 0.00 |        |
| Olfr1518 | 0          | 0.00 |        |
| Olfr152  | 0          | 0.00 |        |
| Olfr153  | 0.0072187  | 0.02 | 223.6% |
| Olfr154  | 0          | 0.00 |        |
| Olfr155  | 0          | 0.00 |        |
| Olfr156  | 0          | 0.00 |        |
| Olfr157  | 0          | 0.00 |        |
| Olfr159  | 0.00834438 | 0.02 | 223.6% |
| Olfr16   | 0          | 0.00 |        |
| Olfr160  | 0          | 0.00 |        |
| Olfr161  | 0          | 0.00 |        |
| Olfr164  | 0          | 0.00 |        |
| Olfr165  | 0          | 0.00 |        |
| Olfr166  | 0          | 0.00 |        |
| Olfr167  | 0          | 0.00 |        |
| Olfr168  | 0          | 0.00 |        |
| Olfr169  | 0          | 0.00 |        |
| Olfr17   | 0          | 0.00 |        |
| Olfr170  | 0          | 0.00 |        |
| Olfr171  | 0          | 0.00 |        |
| Olfr172  | 0          | 0.00 |        |
| Olfr173  | 0          | 0.00 |        |
| Olfr174  | 0          | 0.00 |        |
| Olfr177  | 0          | 0.00 |        |
| Olfr178  | 0          | 0.00 |        |
| Olfr18   | 0.03841274 | 0.03 | 68.9%  |
| Olfr180  | 0          | 0.00 |        |
| Olfr181  | 0          | 0.00 |        |
| Olfr183  | 0          | 0.00 |        |
| Olfr186  | 0          | 0.00 |        |
| Olfr187  | 0          | 0.00 |        |
| Olfr19   | 0          | 0.00 |        |
| Olfr190  | 0          | 0.00 |        |
| Olfr191  | 0          | 0.00 |        |

|         |            |      |        |
|---------|------------|------|--------|
| Olfr192 | 0          | 0.00 |        |
| Olfr193 | 0          | 0.00 |        |
| Olfr194 | 0          | 0.00 |        |
| Olfr195 | 0          | 0.00 |        |
| Olfr196 | 0          | 0.00 |        |
| Olfr197 | 0          | 0.00 |        |
| Olfr198 | 0          | 0.00 |        |
| Olfr199 | 0          | 0.00 |        |
| Olfr2   | 0          | 0.00 |        |
| Olfr201 | 0          | 0.00 |        |
| Olfr202 | 0          | 0.00 |        |
| Olfr203 | 0          | 0.00 |        |
| Olfr204 | 0          | 0.00 |        |
| Olfr205 | 0          | 0.00 |        |
| Olfr206 | 0          | 0.00 |        |
| Olfr209 | 0          | 0.00 |        |
| Olfr211 | 0          | 0.00 |        |
| Olfr212 | 0.03334294 | 0.03 | 101.1% |
| Olfr213 | 0          | 0.00 |        |
| Olfr214 | 0.01522282 | 0.02 | 137.3% |
| Olfr215 | 0          | 0.00 |        |
| Olfr216 | 0          | 0.00 |        |
| Olfr218 | 0          | 0.00 |        |
| Olfr222 | 0          | 0.00 |        |
| Olfr223 | 0          | 0.00 |        |
| Olfr225 | 0          | 0.00 |        |
| Olfr228 | 0          | 0.00 |        |
| Olfr23  | 0          | 0.00 |        |
| Olfr232 | 0          | 0.00 |        |
| Olfr234 | 0          | 0.00 |        |
| Olfr239 | 0.00785052 | 0.02 | 223.6% |
| Olfr24  | 0          | 0.00 |        |
| Olfr244 | 0          | 0.00 |        |
| Olfr247 | 0          | 0.00 |        |
| Olfr25  | 0          | 0.00 |        |
| Olfr250 | 0          | 0.00 |        |
| Olfr251 | 0          | 0.00 |        |
| Olfr257 | 0          | 0.00 |        |
| Olfr259 | 0          | 0.00 |        |
| Olfr26  | 0          | 0.00 |        |
| Olfr262 | 0          | 0.00 |        |
| Olfr266 | 0.01131586 | 0.03 | 223.6% |
| Olfr267 | 0.00848176 | 0.02 | 223.6% |
| Olfr27  | 0          | 0.00 |        |
| Olfr270 | 0          | 0.00 |        |
| Olfr272 | 0          | 0.00 |        |
| Olfr273 | 0          | 0.00 |        |

|         |            |      |        |
|---------|------------|------|--------|
| Olfr275 | 0          | 0.00 |        |
| Olfr281 | 0          | 0.00 |        |
| Olfr282 | 0          | 0.00 |        |
| Olfr283 | 0          | 0.00 |        |
| Olfr284 | 0          | 0.00 |        |
| Olfr288 | 0.07690562 | 0.03 | 38.3%  |
| Olfr290 | 0.00916102 | 0.02 | 223.6% |
| Olfr291 | 0.00771228 | 0.02 | 223.6% |
| Olfr292 | 0          | 0.00 |        |
| Olfr293 | 0          | 0.00 |        |
| Olfr294 | 0          | 0.00 |        |
| Olfr295 | 0          | 0.00 |        |
| Olfr297 | 0          | 0.00 |        |
| Olfr298 | 0          | 0.00 |        |
| Olfr299 | 0          | 0.00 |        |
| Olfr3   | 0.00819758 | 0.02 | 223.6% |
| Olfr30  | 0          | 0.00 |        |
| Olfr301 | 0.00953832 | 0.02 | 223.6% |
| Olfr303 | 0          | 0.00 |        |
| Olfr304 | 0          | 0.00 |        |
| Olfr305 | 0          | 0.00 |        |
| Olfr307 | 0          | 0.00 |        |
| Olfr308 | 0          | 0.00 |        |
| Olfr309 | 0          | 0.00 |        |
| Olfr31  | 1.0545692  | 0.28 | 26.7%  |
| Olfr310 | 0          | 0.00 |        |
| Olfr311 | 0          | 0.00 |        |
| Olfr312 | 0.00951402 | 0.02 | 223.6% |
| Olfr313 | 0          | 0.00 |        |
| Olfr314 | 0          | 0.00 |        |
| Olfr315 | 0          | 0.00 |        |
| Olfr316 | 0.00925486 | 0.02 | 223.6% |
| Olfr317 | 0          | 0.00 |        |
| Olfr318 | 0          | 0.00 |        |
| Olfr319 | 0          | 0.00 |        |
| Olfr32  | 0          | 0.00 |        |
| Olfr320 | 0          | 0.00 |        |
| Olfr323 | 0          | 0.00 |        |
| Olfr324 | 0          | 0.00 |        |
| Olfr325 | 0          | 0.00 |        |
| Olfr328 | 0          | 0.00 |        |
| Olfr329 | 0          | 0.00 |        |
| Olfr33  | 0          | 0.00 |        |
| Olfr330 | 0.05867272 | 0.05 | 82.9%  |
| Olfr331 | 0          | 0.00 |        |
| Olfr332 | 0          | 0.00 |        |
| Olfr335 | 0          | 0.00 |        |

|         |   |      |  |
|---------|---|------|--|
| Olfr338 | 0 | 0.00 |  |
| Olfr339 | 0 | 0.00 |  |
| Olfr340 | 0 | 0.00 |  |
| Olfr341 | 0 | 0.00 |  |
| Olfr342 | 0 | 0.00 |  |
| Olfr344 | 0 | 0.00 |  |
| Olfr345 | 0 | 0.00 |  |
| Olfr346 | 0 | 0.00 |  |
| Olfr347 | 0 | 0.00 |  |
| Olfr348 | 0 | 0.00 |  |
| Olfr350 | 0 | 0.00 |  |
| Olfr351 | 0 | 0.00 |  |
| Olfr352 | 0 | 0.00 |  |
| Olfr353 | 0 | 0.00 |  |
| Olfr354 | 0 | 0.00 |  |
| Olfr355 | 0 | 0.00 |  |
| Olfr356 | 0 | 0.00 |  |
| Olfr357 | 0 | 0.00 |  |
| Olfr358 | 0 | 0.00 |  |
| Olfr360 | 0 | 0.00 |  |
| Olfr361 | 0 | 0.00 |  |
| Olfr362 | 0 | 0.00 |  |
| Olfr365 | 0 | 0.00 |  |
| Olfr366 | 0 | 0.00 |  |
| Olfr367 | 0 | 0.00 |  |
| Olfr368 | 0 | 0.00 |  |
| Olfr370 | 0 | 0.00 |  |
| Olfr371 | 0 | 0.00 |  |
| Olfr372 | 0 | 0.00 |  |
| Olfr373 | 0 | 0.00 |  |
| Olfr374 | 0 | 0.00 |  |
| Olfr376 | 0 | 0.00 |  |
| Olfr378 | 0 | 0.00 |  |
| Olfr38  | 0 | 0.00 |  |
| Olfr380 | 0 | 0.00 |  |
| Olfr381 | 0 | 0.00 |  |
| Olfr382 | 0 | 0.00 |  |
| Olfr385 | 0 | 0.00 |  |
| Olfr386 | 0 | 0.00 |  |
| Olfr389 | 0 | 0.00 |  |
| Olfr39  | 0 | 0.00 |  |
| Olfr390 | 0 | 0.00 |  |
| Olfr392 | 0 | 0.00 |  |
| Olfr393 | 0 | 0.00 |  |
| Olfr394 | 0 | 0.00 |  |
| Olfr395 | 0 | 0.00 |  |
| Olfr397 | 0 | 0.00 |  |

|         |            |      |        |
|---------|------------|------|--------|
| Olfr398 | 0          | 0.00 |        |
| Olfr399 | 0          | 0.00 |        |
| Olfr401 | 0          | 0.00 |        |
| Olfr402 | 0          | 0.00 |        |
| Olfr403 | 0          | 0.00 |        |
| Olfr406 | 0          | 0.00 |        |
| Olfr410 | 0          | 0.00 |        |
| Olfr411 | 0          | 0.00 |        |
| Olfr412 | 0          | 0.00 |        |
| Olfr414 | 0          | 0.00 |        |
| Olfr415 | 0          | 0.00 |        |
| Olfr417 | 0          | 0.00 |        |
| Olfr419 | 0          | 0.00 |        |
| Olfr42  | 0          | 0.00 |        |
| Olfr420 | 0          | 0.00 |        |
| Olfr421 | 0.0115479  | 0.03 | 223.6% |
| Olfr424 | 0          | 0.00 |        |
| Olfr427 | 0          | 0.00 |        |
| Olfr429 | 0          | 0.00 |        |
| Olfr43  | 0          | 0.00 |        |
| Olfr430 | 0          | 0.00 |        |
| Olfr432 | 0.00803762 | 0.02 | 223.6% |
| Olfr433 | 0          | 0.00 |        |
| Olfr434 | 0          | 0.00 |        |
| Olfr435 | 0          | 0.00 |        |
| Olfr437 | 0          | 0.00 |        |
| Olfr438 | 0          | 0.00 |        |
| Olfr44  | 0          | 0.00 |        |
| Olfr441 | 0          | 0.00 |        |
| Olfr444 | 0          | 0.00 |        |
| Olfr446 | 0          | 0.00 |        |
| Olfr447 | 0          | 0.00 |        |
| Olfr448 | 0          | 0.00 |        |
| Olfr449 | 0          | 0.00 |        |
| Olfr45  | 0          | 0.00 |        |
| Olfr450 | 0          | 0.00 |        |
| Olfr452 | 0          | 0.00 |        |
| Olfr453 | 0          | 0.00 |        |
| Olfr456 | 0.01306784 | 0.02 | 137.2% |
| Olfr457 | 0          | 0.00 |        |
| Olfr458 | 0          | 0.00 |        |
| Olfr459 | 0          | 0.00 |        |
| Olfr46  | 0          | 0.00 |        |
| Olfr460 | 0.00854522 | 0.02 | 223.6% |
| Olfr461 | 0.11764934 | 0.10 | 89.0%  |
| Olfr462 | 0          | 0.00 |        |
| Olfr463 | 0.00725174 | 0.02 | 223.6% |

|         |            |      |        |
|---------|------------|------|--------|
| Olfr464 | 0.0208881  | 0.03 | 150.7% |
| Olfr466 | 0          | 0.00 |        |
| Olfr467 | 0          | 0.00 |        |
| Olfr469 | 0          | 0.00 |        |
| Olfr47  | 0          | 0.00 |        |
| Olfr470 | 0          | 0.00 |        |
| Olfr472 | 0          | 0.00 |        |
| Olfr473 | 0.01156854 | 0.03 | 223.6% |
| Olfr474 | 0          | 0.00 |        |
| Olfr476 | 0          | 0.00 |        |
| Olfr477 | 0          | 0.00 |        |
| Olfr478 | 0          | 0.00 |        |
| Olfr479 | 0          | 0.00 |        |
| Olfr48  | 0          | 0.00 |        |
| Olfr480 | 0          | 0.00 |        |
| Olfr481 | 0          | 0.00 |        |
| Olfr482 | 0          | 0.00 |        |
| Olfr483 | 0          | 0.00 |        |
| Olfr484 | 0          | 0.00 |        |
| Olfr485 | 0          | 0.00 |        |
| Olfr486 | 0          | 0.00 |        |
| Olfr487 | 0          | 0.00 |        |
| Olfr488 | 0          | 0.00 |        |
| Olfr49  | 0          | 0.00 |        |
| Olfr490 | 0          | 0.00 |        |
| Olfr491 | 0          | 0.00 |        |
| Olfr492 | 0          | 0.00 |        |
| Olfr493 | 0          | 0.00 |        |
| Olfr494 | 0          | 0.00 |        |
| Olfr495 | 0          | 0.00 |        |
| Olfr497 | 0          | 0.00 |        |
| Olfr498 | 0          | 0.00 |        |
| Olfr5   | 0          | 0.00 |        |
| Olfr50  | 0          | 0.00 |        |
| Olfr502 | 0          | 0.00 |        |
| Olfr503 | 0          | 0.00 |        |
| Olfr504 | 0          | 0.00 |        |
| Olfr506 | 0          | 0.00 |        |
| Olfr507 | 0          | 0.00 |        |
| Olfr508 | 0          | 0.00 |        |
| Olfr509 | 0          | 0.00 |        |
| Olfr51  | 0          | 0.00 |        |
| Olfr510 | 0          | 0.00 |        |
| Olfr512 | 0          | 0.00 |        |
| Olfr513 | 0          | 0.00 |        |
| Olfr514 | 0          | 0.00 |        |
| Olfr516 | 0          | 0.00 |        |

|         |             |      |        |
|---------|-------------|------|--------|
| Olfr517 | 0           | 0.00 |        |
| Olfr518 | 0           | 0.00 |        |
| Olfr519 | 0           | 0.00 |        |
| Olfr52  | 0           | 0.00 |        |
| Olfr520 | 0           | 0.00 |        |
| Olfr521 | 0           | 0.00 |        |
| Olfr522 | 0           | 0.00 |        |
| Olfr523 | 0           | 0.00 |        |
| Olfr524 | 0           | 0.00 |        |
| Olfr525 | 0           | 0.00 |        |
| Olfr527 | 0           | 0.00 |        |
| Olfr53  | 0           | 0.00 |        |
| Olfr530 | 0           | 0.00 |        |
| Olfr531 | 0           | 0.00 |        |
| Olfr532 | 0           | 0.00 |        |
| Olfr533 | 0           | 0.00 |        |
| Olfr535 | 0           | 0.00 |        |
| Olfr536 | 0.006788002 | 0.01 | 93.8%  |
| Olfr538 | 0           | 0.00 |        |
| Olfr539 | 0           | 0.00 |        |
| Olfr54  | 0           | 0.00 |        |
| Olfr541 | 0           | 0.00 |        |
| Olfr543 | 0.01510262  | 0.02 | 138.7% |
| Olfr544 | 0           | 0.00 |        |
| Olfr545 | 0.00896114  | 0.02 | 223.6% |
| Olfr547 | 0           | 0.00 |        |
| Olfr549 | 0           | 0.00 |        |
| Olfr55  | 0           | 0.00 |        |
| Olfr550 | 0           | 0.00 |        |
| Olfr551 | 0           | 0.00 |        |
| Olfr552 | 0           | 0.00 |        |
| Olfr553 | 0           | 0.00 |        |
| Olfr554 | 0           | 0.00 |        |
| Olfr555 | 0           | 0.00 |        |
| Olfr556 | 0           | 0.00 |        |
| Olfr557 | 0           | 0.00 |        |
| Olfr558 | 0           | 0.00 |        |
| Olfr559 | 0           | 0.00 |        |
| Olfr56  | 0.0044474   | 0.01 | 223.6% |
| Olfr560 | 0           | 0.00 |        |
| Olfr561 | 0           | 0.00 |        |
| Olfr564 | 0           | 0.00 |        |
| Olfr566 | 0           | 0.00 |        |
| Olfr568 | 0           | 0.00 |        |
| Olfr569 | 0           | 0.00 |        |
| Olfr57  | 0           | 0.00 |        |
| Olfr570 | 0           | 0.00 |        |



|         |            |      |        |
|---------|------------|------|--------|
| Olfr571 | 0          | 0.00 |        |
| Olfr572 | 0          | 0.00 |        |
| Olfr574 | 0          | 0.00 |        |
| Olfr575 | 0          | 0.00 |        |
| Olfr576 | 0          | 0.00 |        |
| Olfr577 | 0          | 0.00 |        |
| Olfr578 | 0          | 0.00 |        |
| Olfr58  | 0.00736842 | 0.02 | 223.6% |
| Olfr582 | 0          | 0.00 |        |
| Olfr583 | 0          | 0.00 |        |
| Olfr584 | 0          | 0.00 |        |
| Olfr585 | 0          | 0.00 |        |
| Olfr586 | 0          | 0.00 |        |
| Olfr589 | 0          | 0.00 |        |
| Olfr59  | 0          | 0.00 |        |
| Olfr591 | 0          | 0.00 |        |
| Olfr592 | 0          | 0.00 |        |
| Olfr593 | 0          | 0.00 |        |
| Olfr594 | 0          | 0.00 |        |
| Olfr597 | 0          | 0.00 |        |
| Olfr598 | 0          | 0.00 |        |
| Olfr599 | 0          | 0.00 |        |
| Olfr6   | 0          | 0.00 |        |
| Olfr60  | 0          | 0.00 |        |
| Olfr600 | 0          | 0.00 |        |
| Olfr601 | 0          | 0.00 |        |
| Olfr604 | 0          | 0.00 |        |
| Olfr605 | 0          | 0.00 |        |
| Olfr606 | 0          | 0.00 |        |
| Olfr608 | 0          | 0.00 |        |
| Olfr609 | 0          | 0.00 |        |
| Olfr61  | 0          | 0.00 |        |
| Olfr610 | 0          | 0.00 |        |
| Olfr611 | 0          | 0.00 |        |
| Olfr614 | 0          | 0.00 |        |
| Olfr615 | 0          | 0.00 |        |
| Olfr616 | 0          | 0.00 |        |
| Olfr617 | 0          | 0.00 |        |
| Olfr618 | 0.00982582 | 0.02 | 223.6% |
| Olfr619 | 0          | 0.00 |        |
| Olfr62  | 0          | 0.00 |        |
| Olfr620 | 0          | 0.00 |        |
| Olfr622 | 0          | 0.00 |        |
| Olfr623 | 0          | 0.00 |        |
| Olfr624 | 0          | 0.00 |        |
| Olfr627 | 0          | 0.00 |        |
| Olfr628 | 0          | 0.00 |        |

|         |            |      |        |
|---------|------------|------|--------|
| Olfr629 | 0          | 0.00 |        |
| Olfr63  | 0          | 0.00 |        |
| Olfr630 | 0          | 0.00 |        |
| Olfr631 | 0          | 0.00 |        |
| Olfr632 | 0          | 0.00 |        |
| Olfr633 | 0.00665428 | 0.01 | 223.6% |
| Olfr635 | 0          | 0.00 |        |
| Olfr638 | 0          | 0.00 |        |
| Olfr639 | 0          | 0.00 |        |
| Olfr64  | 0          | 0.00 |        |
| Olfr640 | 0          | 0.00 |        |
| Olfr641 | 0          | 0.00 |        |
| Olfr642 | 0          | 0.00 |        |
| Olfr643 | 0          | 0.00 |        |
| Olfr644 | 0          | 0.00 |        |
| Olfr645 | 0          | 0.00 |        |
| Olfr646 | 0          | 0.00 |        |
| Olfr648 | 0          | 0.00 |        |
| Olfr649 | 0          | 0.00 |        |
| Olfr65  | 0          | 0.00 |        |
| Olfr651 | 0          | 0.00 |        |
| Olfr652 | 0          | 0.00 |        |
| Olfr653 | 0          | 0.00 |        |
| Olfr654 | 0          | 0.00 |        |
| Olfr655 | 0          | 0.00 |        |
| Olfr656 | 0          | 0.00 |        |
| Olfr657 | 0          | 0.00 |        |
| Olfr658 | 0.00308126 | 0.01 | 223.6% |
| Olfr659 | 0          | 0.00 |        |
| Olfr66  | 0          | 0.00 |        |
| Olfr661 | 0          | 0.00 |        |
| Olfr663 | 0          | 0.00 |        |
| Olfr665 | 0          | 0.00 |        |
| Olfr666 | 0          | 0.00 |        |
| Olfr667 | 0          | 0.00 |        |
| Olfr668 | 0.01115622 | 0.02 | 223.6% |
| Olfr669 | 0          | 0.00 |        |
| Olfr67  | 0          | 0.00 |        |
| Olfr670 | 0          | 0.00 |        |
| Olfr671 | 0          | 0.00 |        |
| Olfr672 | 0          | 0.00 |        |
| Olfr675 | 0          | 0.00 |        |
| Olfr676 | 0          | 0.00 |        |
| Olfr677 | 0          | 0.00 |        |
| Olfr678 | 0          | 0.00 |        |
| Olfr679 | 0          | 0.00 |        |
| Olfr68  | 0          | 0.00 |        |

|         |            |      |        |
|---------|------------|------|--------|
| Olfr681 | 0          | 0.00 |        |
| Olfr683 | 0          | 0.00 |        |
| Olfr684 | 0          | 0.00 |        |
| Olfr685 | 0          | 0.00 |        |
| Olfr686 | 0          | 0.00 |        |
| Olfr688 | 0          | 0.00 |        |
| Olfr689 | 0.01065284 | 0.02 | 223.6% |
| Olfr69  | 0          | 0.00 |        |
| Olfr690 | 0.06981494 | 0.06 | 85.3%  |
| Olfr691 | 0.03273982 | 0.05 | 140.5% |
| Olfr692 | 0.14063052 | 0.12 | 83.4%  |
| Olfr693 | 0          | 0.00 |        |
| Olfr694 | 0          | 0.00 |        |
| Olfr695 | 0          | 0.00 |        |
| Olfr697 | 0          | 0.00 |        |
| Olfr698 | 0          | 0.00 |        |
| Olfr699 | 0          | 0.00 |        |
| Olfr700 | 0          | 0.00 |        |
| Olfr701 | 0          | 0.00 |        |
| Olfr702 | 0          | 0.00 |        |
| Olfr703 | 0          | 0.00 |        |
| Olfr704 | 0          | 0.00 |        |
| Olfr705 | 0          | 0.00 |        |
| Olfr706 | 0          | 0.00 |        |
| Olfr707 | 0          | 0.00 |        |
| Olfr708 | 0          | 0.00 |        |
| Olfr71  | 0          | 0.00 |        |
| Olfr710 | 0          | 0.00 |        |
| Olfr711 | 0          | 0.00 |        |
| Olfr713 | 0          | 0.00 |        |
| Olfr714 | 0          | 0.00 |        |
| Olfr715 | 0          | 0.00 |        |
| Olfr716 | 0          | 0.00 |        |
| Olfr720 | 0          | 0.00 |        |
| Olfr722 | 0          | 0.00 |        |
| Olfr723 | 0          | 0.00 |        |
| Olfr724 | 0          | 0.00 |        |
| Olfr725 | 0          | 0.00 |        |
| Olfr726 | 0          | 0.00 |        |
| Olfr727 | 0          | 0.00 |        |
| Olfr728 | 0          | 0.00 |        |
| Olfr729 | 0          | 0.00 |        |
| Olfr73  | 0          | 0.00 |        |
| Olfr730 | 0          | 0.00 |        |
| Olfr731 | 0          | 0.00 |        |
| Olfr732 | 0          | 0.00 |        |
| Olfr733 | 0          | 0.00 |        |

|             |            |      |        |
|-------------|------------|------|--------|
| Olfr734     | 0          | 0.00 |        |
| Olfr735     | 0          | 0.00 |        |
| Olfr736     | 0          | 0.00 |        |
| Olfr738     | 0          | 0.00 |        |
| Olfr739     | 0          | 0.00 |        |
| Olfr74      | 0          | 0.00 |        |
| Olfr740     | 0          | 0.00 |        |
| Olfr741     | 0          | 0.00 |        |
| Olfr742     | 0          | 0.00 |        |
| Olfr744     | 0          | 0.00 |        |
| Olfr745     | 0          | 0.00 |        |
| Olfr746     | 0          | 0.00 |        |
| Olfr747     | 0          | 0.00 |        |
| Olfr748     | 0          | 0.00 |        |
| Olfr749     | 0          | 0.00 |        |
| Olfr750     | 0          | 0.00 |        |
| Olfr76      | 0.00954246 | 0.02 | 223.6% |
| Olfr761     | 0          | 0.00 |        |
| Olfr763     | 0          | 0.00 |        |
| Olfr765     | 0          | 0.00 |        |
| Olfr767     | 0          | 0.00 |        |
| Olfr768     | 0          | 0.00 |        |
| Olfr769     | 0          | 0.00 |        |
| Olfr77      | 0          | 0.00 |        |
| Olfr770     | 0          | 0.00 |        |
| Olfr771     | 0          | 0.00 |        |
| Olfr772     | 0          | 0.00 |        |
| Olfr773-ps1 | 0          | 0.00 |        |
| Olfr774     | 0          | 0.00 |        |
| Olfr776     | 0          | 0.00 |        |
| Olfr777     | 0          | 0.00 |        |
| Olfr78      | 0.00798072 | 0.01 | 91.7%  |
| Olfr780     | 0          | 0.00 |        |
| Olfr781     | 0          | 0.00 |        |
| Olfr782     | 0          | 0.00 |        |
| Olfr784     | 0          | 0.00 |        |
| Olfr786     | 0          | 0.00 |        |
| Olfr787     | 0.01157498 | 0.03 | 223.6% |
| Olfr788     | 0          | 0.00 |        |
| Olfr790     | 0          | 0.00 |        |
| Olfr791     | 0          | 0.00 |        |
| Olfr792     | 0          | 0.00 |        |
| Olfr794     | 0          | 0.00 |        |
| Olfr796     | 0          | 0.00 |        |
| Olfr798     | 0          | 0.00 |        |
| Olfr799     | 0          | 0.00 |        |
| Olfr8       | 0          | 0.00 |        |

|         |           |      |        |
|---------|-----------|------|--------|
| Olfr800 | 0         | 0.00 |        |
| Olfr801 | 0         | 0.00 |        |
| Olfr802 | 0         | 0.00 |        |
| Olfr803 | 0         | 0.00 |        |
| Olfr804 | 0         | 0.00 |        |
| Olfr805 | 0         | 0.00 |        |
| Olfr806 | 0         | 0.00 |        |
| Olfr807 | 0         | 0.00 |        |
| Olfr808 | 0         | 0.00 |        |
| Olfr809 | 0         | 0.00 |        |
| Olfr810 | 0         | 0.00 |        |
| Olfr811 | 0         | 0.00 |        |
| Olfr812 | 0         | 0.00 |        |
| Olfr813 | 0         | 0.00 |        |
| Olfr814 | 0         | 0.00 |        |
| Olfr815 | 0         | 0.00 |        |
| Olfr816 | 0         | 0.00 |        |
| Olfr818 | 0         | 0.00 |        |
| Olfr820 | 0         | 0.00 |        |
| Olfr821 | 0         | 0.00 |        |
| Olfr822 | 0         | 0.00 |        |
| Olfr823 | 0         | 0.00 |        |
| Olfr824 | 0         | 0.00 |        |
| Olfr825 | 0         | 0.00 |        |
| Olfr826 | 0         | 0.00 |        |
| Olfr827 | 0         | 0.00 |        |
| Olfr828 | 0         | 0.00 |        |
| Olfr829 | 0         | 0.00 |        |
| Olfr830 | 0         | 0.00 |        |
| Olfr832 | 0         | 0.00 |        |
| Olfr834 | 0         | 0.00 |        |
| Olfr835 | 0         | 0.00 |        |
| Olfr836 | 0         | 0.00 |        |
| Olfr837 | 0         | 0.00 |        |
| Olfr843 | 0         | 0.00 |        |
| Olfr845 | 0         | 0.00 |        |
| Olfr846 | 0         | 0.00 |        |
| Olfr847 | 0         | 0.00 |        |
| Olfr849 | 0         | 0.00 |        |
| Olfr850 | 0         | 0.00 |        |
| Olfr851 | 0         | 0.00 |        |
| Olfr853 | 0         | 0.00 |        |
| Olfr854 | 0         | 0.00 |        |
| Olfr855 | 0         | 0.00 |        |
| Olfr857 | 0.0102241 | 0.02 | 223.6% |
| Olfr859 | 0.0090394 | 0.02 | 223.6% |
| Olfr860 | 0         | 0.00 |        |

|         |            |      |        |
|---------|------------|------|--------|
| Olfr862 | 0.00864116 | 0.02 | 223.6% |
| Olfr866 | 0          | 0.00 |        |
| Olfr867 | 0          | 0.00 |        |
| Olfr868 | 0          | 0.00 |        |
| Olfr869 | 0          | 0.00 |        |
| Olfr870 | 0          | 0.00 |        |
| Olfr871 | 0          | 0.00 |        |
| Olfr872 | 0          | 0.00 |        |
| Olfr873 | 0          | 0.00 |        |
| Olfr874 | 0.0085395  | 0.02 | 223.6% |
| Olfr875 | 0          | 0.00 |        |
| Olfr876 | 0          | 0.00 |        |
| Olfr877 | 0          | 0.00 |        |
| Olfr878 | 0          | 0.00 |        |
| Olfr881 | 0          | 0.00 |        |
| Olfr883 | 0          | 0.00 |        |
| Olfr884 | 0          | 0.00 |        |
| Olfr885 | 0          | 0.00 |        |
| Olfr887 | 0          | 0.00 |        |
| Olfr888 | 0          | 0.00 |        |
| Olfr889 | 0          | 0.00 |        |
| Olfr890 | 0          | 0.00 |        |
| Olfr891 | 0          | 0.00 |        |
| Olfr893 | 0          | 0.00 |        |
| Olfr894 | 0          | 0.00 |        |
| Olfr895 | 0          | 0.00 |        |
| Olfr898 | 0          | 0.00 |        |
| Olfr9   | 0.00991006 | 0.02 | 223.6% |
| Olfr90  | 0.00603348 | 0.01 | 223.6% |
| Olfr901 | 0          | 0.00 |        |
| Olfr902 | 0          | 0.00 |        |
| Olfr904 | 0          | 0.00 |        |
| Olfr905 | 0          | 0.00 |        |
| Olfr906 | 0          | 0.00 |        |
| Olfr907 | 0          | 0.00 |        |
| Olfr908 | 0          | 0.00 |        |
| Olfr909 | 0          | 0.00 |        |
| Olfr91  | 0          | 0.00 |        |
| Olfr910 | 0          | 0.00 |        |
| Olfr912 | 0          | 0.00 |        |
| Olfr913 | 0          | 0.00 |        |
| Olfr914 | 0          | 0.00 |        |
| Olfr915 | 0          | 0.00 |        |
| Olfr916 | 0          | 0.00 |        |
| Olfr917 | 0          | 0.00 |        |
| Olfr918 | 0          | 0.00 |        |
| Olfr919 | 0          | 0.00 |        |

|         |            |      |        |
|---------|------------|------|--------|
| Olfr92  | 0          | 0.00 |        |
| Olfr920 | 0.05920446 | 0.08 | 128.0% |
| Olfr921 | 0          | 0.00 |        |
| Olfr922 | 0          | 0.00 |        |
| Olfr923 | 0          | 0.00 |        |
| Olfr924 | 0          | 0.00 |        |
| Olfr926 | 0.00864466 | 0.02 | 223.6% |
| Olfr93  | 0          | 0.00 |        |
| Olfr930 | 0          | 0.00 |        |
| Olfr933 | 0          | 0.00 |        |
| Olfr934 | 0          | 0.00 |        |
| Olfr935 | 0          | 0.00 |        |
| Olfr937 | 0          | 0.00 |        |
| Olfr938 | 0          | 0.00 |        |
| Olfr94  | 0.02736178 | 0.03 | 112.5% |
| Olfr943 | 0          | 0.00 |        |
| Olfr944 | 0          | 0.00 |        |
| Olfr945 | 0          | 0.00 |        |
| Olfr948 | 0          | 0.00 |        |
| Olfr95  | 0          | 0.00 |        |
| Olfr951 | 0          | 0.00 |        |
| Olfr952 | 0          | 0.00 |        |
| Olfr954 | 0          | 0.00 |        |
| Olfr955 | 0          | 0.00 |        |
| Olfr957 | 0          | 0.00 |        |
| Olfr958 | 0          | 0.00 |        |
| Olfr959 | 0          | 0.00 |        |
| Olfr96  | 0          | 0.00 |        |
| Olfr960 | 0          | 0.00 |        |
| Olfr961 | 0          | 0.00 |        |
| Olfr963 | 0          | 0.00 |        |
| Olfr965 | 0          | 0.00 |        |
| Olfr967 | 0          | 0.00 |        |
| Olfr968 | 0          | 0.00 |        |
| Olfr969 | 0          | 0.00 |        |
| Olfr97  | 0          | 0.00 |        |
| Olfr970 | 0          | 0.00 |        |
| Olfr971 | 0          | 0.00 |        |
| Olfr972 | 0          | 0.00 |        |
| Olfr973 | 0          | 0.00 |        |
| Olfr974 | 0          | 0.00 |        |
| Olfr975 | 0          | 0.00 |        |
| Olfr976 | 0          | 0.00 |        |
| Olfr978 | 0          | 0.00 |        |
| Olfr979 | 0          | 0.00 |        |
| Olfr98  | 0          | 0.00 |        |
| Olfr980 | 0          | 0.00 |        |

|         |             |      |        |
|---------|-------------|------|--------|
| Olfr981 | 0           | 0.00 |        |
| Olfr982 | 0           | 0.00 |        |
| Olfr983 | 0           | 0.00 |        |
| Olfr984 | 0           | 0.00 |        |
| Olfr985 | 0           | 0.00 |        |
| Olfr986 | 0           | 0.00 |        |
| Olfr987 | 0           | 0.00 |        |
| Olfr988 | 0           | 0.00 |        |
| Olfr99  | 0           | 0.00 |        |
| Olfr992 | 0           | 0.00 |        |
| Olfr993 | 0           | 0.00 |        |
| Olfr994 | 0           | 0.00 |        |
| Olfr995 | 0           | 0.00 |        |
| Olfr996 | 0           | 0.00 |        |
| Olfr998 | 0           | 0.00 |        |
| Olig1   | 39.23698    | 5.54 | 14.1%  |
| Olig2   | 9.044424    | 1.06 | 11.8%  |
| Olig3   | 0.2646404   | 0.07 | 27.1%  |
| Olr1    | 0.01865392  | 0.03 | 151.7% |
| Oma1    | 1.80896     | 0.21 | 11.6%  |
| Omd     | 0.03795018  | 0.04 | 118.1% |
| Omg     | 35.42784    | 3.53 | 10.0%  |
| Omp     | 0.05376042  | 0.03 | 49.1%  |
| Omt2b   | 0           | 0.00 |        |
| Onecut1 | 0.6410818   | 0.17 | 26.9%  |
| Onecut2 | 0.4867004   | 0.05 | 11.0%  |
| Onecut3 | 0.3986066   | 0.06 | 16.1%  |
| Oog1    | 0           | 0.00 |        |
| Oog2    | 0           | 0.00 |        |
| Oog3    | 0           | 0.00 |        |
| Oog4    | 0           | 0.00 |        |
| Oosp1   | 0           | 0.00 |        |
| Opa1    | 33.36716    | 1.68 | 5.0%   |
| Opa3    | 15.3277     | 1.41 | 9.2%   |
| Opcml   | 25.10126    | 0.84 | 3.3%   |
| Ophn1   | 9.88491     | 0.67 | 6.8%   |
| Oplah   | 0.7794984   | 0.05 | 6.5%   |
| Opn1mw  | 0.08920682  | 0.04 | 39.4%  |
| Opn1sw  | 0           | 0.00 |        |
| Opn3    | 5.52417     | 0.46 | 8.4%   |
| Opn4    | 0.029248    | 0.01 | 17.4%  |
| Opn5    | 0           | 0.00 |        |
| oppo_1  | 0.04501856  | 0.01 | 27.0%  |
| Oprd1   | 0.9108476   | 0.13 | 14.5%  |
| Oprk1   | 0.5481206   | 0.22 | 40.6%  |
| Oprl1   | 8.592422    | 1.69 | 19.7%  |
| Oprm    | 0.010715288 | 0.02 | 157.0% |



|            |            |      |        |
|------------|------------|------|--------|
| Oprm1      | 2.775726   | 0.87 | 31.2%  |
| Oprs1      | 29.6739    | 4.04 | 13.6%  |
| Optc       | 0.590794   | 0.14 | 24.4%  |
| Optn       | 8.886704   | 0.41 | 4.7%   |
| Orai1      | 2.683944   | 0.27 | 10.2%  |
| Orai2      | 11.07448   | 0.35 | 3.2%   |
| Orai3      | 2.305922   | 0.20 | 8.9%   |
| Oraov1     | 6.012144   | 0.29 | 4.8%   |
| Orc1l      | 0.169724   | 0.02 | 10.5%  |
| Orc2l      | 8.036302   | 2.97 | 37.0%  |
| Orc3l      | 15.28064   | 0.81 | 5.3%   |
| Orc4l      | 16.97532   | 1.00 | 5.9%   |
| Orc5l      | 14.26006   | 0.90 | 6.3%   |
| Orc6       | 0.3704924  | 0.23 | 61.5%  |
| Orc6l      | 10.243418  | 0.90 | 8.8%   |
| ORF19      | 7.903666   | 0.43 | 5.4%   |
| ORF28      | 1.994692   | 0.42 | 21.0%  |
| ORF3       | 1.536272   | 0.44 | 28.6%  |
| ORF34      | 10.220854  | 0.62 | 6.1%   |
| ORF37      | 0.0918074  | 0.03 | 29.5%  |
| ORF61      | 33.74524   | 1.05 | 3.1%   |
| ORF63      | 0.00519594 | 0.01 | 223.6% |
| ORF9       | 0.10482766 | 0.09 | 87.1%  |
| Orm1       | 0.00817554 | 0.02 | 223.6% |
| Orm2       | 0.0350537  | 0.02 | 58.1%  |
| Orm3       | 0.01439982 | 0.03 | 223.6% |
| Ormdl1     | 4.085984   | 0.58 | 14.2%  |
| Ormdl2     | 0.7956782  | 0.20 | 24.6%  |
| Ormdl3     | 15.53942   | 0.54 | 3.5%   |
| Orp1       | 0.4850541  | 0.50 | 102.8% |
| Os9        | 40.49588   | 1.59 | 3.9%   |
| Osbp       | 29.45846   | 1.11 | 3.8%   |
| Osbp2      | 13.31736   | 1.49 | 11.2%  |
| Osbpl10    | 5.8167     | 0.35 | 6.1%   |
| Osbpl11    | 3.691952   | 0.25 | 6.8%   |
| Osbpl1a    | 22.56432   | 0.75 | 3.3%   |
| Osbpl2     | 24.52062   | 1.39 | 5.7%   |
| Osbpl3     | 1.516942   | 0.21 | 13.8%  |
| Osbpl5     | 8.686558   | 0.31 | 3.6%   |
| Osbpl6     | 13.07388   | 0.31 | 2.3%   |
| Osbpl7     | 4.75702    | 0.25 | 5.2%   |
| Osbpl8     | 10.300558  | 0.63 | 6.1%   |
| Osbpl9     | 38.24118   | 2.20 | 5.7%   |
| Oscar      | 0.11223414 | 0.04 | 33.2%  |
| OSCP1      | 0.12102538 | 0.03 | 28.7%  |
| Osf2/Cbfa1 | 0.1726982  | 0.04 | 25.5%  |
| Osgep      | 1.482014   | 0.13 | 8.5%   |

|                    |             |      |        |
|--------------------|-------------|------|--------|
| Osgepl1            | 6.204       | 0.76 | 12.3%  |
| Osgin1             | 0.05671408  | 0.04 | 70.0%  |
| Osgin2             | 5.83477     | 0.19 | 3.2%   |
| Osm                | 0           | 0.00 |        |
| Osmr               | 0.8755908   | 0.18 | 20.7%  |
| Osr1               | 12.4387     | 0.92 | 7.4%   |
| Osr2               | 0.7936374   | 0.21 | 27.0%  |
| Osta               | 0.01267934  | 0.01 | 92.7%  |
| Ostb               | 0           | 0.00 |        |
| Ostf1              | 6.05118     | 0.41 | 6.8%   |
| Ostm1              | 18.00266    | 0.79 | 4.4%   |
| Ostn               | 0.04820018  | 0.05 | 110.8% |
| Otc                | 0           | 0.00 |        |
| Otoa               | 0.06128332  | 0.03 | 54.4%  |
| Otof               | 0.020886126 | 0.01 | 44.6%  |
| Otog               | 0.000784452 | 0.00 | 223.6% |
| Otop1              | 0.10652198  | 0.05 | 48.5%  |
| Otop2              | 0.02279922  | 0.02 | 91.4%  |
| Otop3              | 0.01075436  | 0.01 | 59.4%  |
| Otor               | 0.0207222   | 0.05 | 223.6% |
| Otos               | 0.01554902  | 0.02 | 138.6% |
| Otp                | 0.8215004   | 0.17 | 21.2%  |
| Ott                | 0           | 0.00 |        |
| OTTMUSG00000000231 | 0           | 0.00 |        |
| OTTMUSG00000000281 | 0           | 0.00 |        |
| OTTMUSG00000000421 | 1.519408    | 0.18 | 11.5%  |
| OTTMUSG00000000480 | 0           | 0.00 |        |
| OTTMUSG00000000494 | 0           | 0.00 |        |
| OTTMUSG00000000514 | 0           | 0.00 |        |
| OTTMUSG00000000541 | 0           | 0.00 |        |
| OTTMUSG00000000651 | 0           | 0.00 |        |
| OTTMUSG00000000712 | 0.00995358  | 0.01 | 139.2% |
| OTTMUSG00000000720 | 0.00384904  | 0.01 | 223.6% |
| OTTMUSG00000000934 | 0.07880852  | 0.03 | 37.5%  |
| OTTMUSG00000000971 | 0.01590782  | 0.04 | 223.6% |
| OTTMUSG00000000990 | 0           | 0.00 |        |
| OTTMUSG00000000997 | 0.0096669   | 0.01 | 140.5% |
| OTTMUSG00000001246 | 0           | 0.00 |        |
| OTTMUSG00000002038 | 0.0218687   | 0.03 | 151.4% |
| OTTMUSG00000002177 | 0           | 0.00 |        |
| OTTMUSG00000002180 | 0           | 0.00 |        |
| OTTMUSG00000002196 | 0           | 0.00 |        |
| OTTMUSG00000004461 | 8.229142    | 0.82 | 9.9%   |
| OTTMUSG00000004966 | 0           | 0.00 |        |
| OTTMUSG00000005065 | 0.0390718   | 0.02 | 48.8%  |
| OTTMUSG00000005148 | 0.0675679   | 0.04 | 59.5%  |
| OTTMUSG00000005491 | 0.00532464  | 0.01 | 138.5% |

|                    |             |      |        |
|--------------------|-------------|------|--------|
| OTTMUSG00000005523 | 0.001794236 | 0.00 | 223.6% |
| OTTMUSG00000005737 | 0.00643494  | 0.01 | 223.6% |
| OTTMUSG00000007485 | 0           | 0.00 |        |
| OTTMUSG00000007655 | 0           | 0.00 |        |
| OTTMUSG00000008540 | 0           | 0.00 |        |
| OTTMUSG00000008561 | 0.43404     | 0.12 | 26.8%  |
| OTTMUSG00000008911 | 0           | 0.00 |        |
| OTTMUSG00000010009 | 0           | 0.00 |        |
| OTTMUSG00000010105 | 0.799842    | 0.12 | 15.3%  |
| OTTMUSG00000010173 | 0.00575598  | 0.01 | 137.3% |
| OTTMUSG00000010207 | 0           | 0.00 |        |
| OTTMUSG00000010328 | 0           | 0.00 |        |
| OTTMUSG00000010432 | 0           | 0.00 |        |
| OTTMUSG00000010433 | 0           | 0.00 |        |
| OTTMUSG00000010537 | 0           | 0.00 |        |
| OTTMUSG00000010657 | 0.2287236   | 0.03 | 14.3%  |
| OTTMUSG00000010671 | 0.04907168  | 0.05 | 108.4% |
| OTTMUSG00000010673 | 0.4403338   | 0.06 | 13.1%  |
| OTTMUSG00000010694 | 0.0592254   | 0.03 | 55.7%  |
| OTTMUSG00000010965 | 0.06041698  | 0.02 | 34.3%  |
| OTTMUSG00000011070 | 0.13214106  | 0.04 | 31.9%  |
| OTTMUSG00000011268 | 0           | 0.00 |        |
| OTTMUSG00000011269 | 0           | 0.00 |        |
| OTTMUSG00000011272 | 0           | 0.00 |        |
| OTTMUSG00000011275 | 0           | 0.00 |        |
| OTTMUSG00000012686 | 0.311327    | 0.09 | 29.3%  |
| OTTMUSG00000013918 | 0.02319638  | 0.03 | 111.3% |
| OTTMUSG00000014964 | 4.720418    | 0.57 | 12.1%  |
| OTTMUSG00000015529 | 0.0029153   | 0.01 | 223.6% |
| OTTMUSG00000015643 | 0.00812198  | 0.02 | 223.6% |
| OTTMUSG00000015730 | 0.8427628   | 0.21 | 24.6%  |
| OTTMUSG00000015743 | 0.5248954   | 0.19 | 36.2%  |
| OTTMUSG00000015750 | 17.32532    | 0.29 | 1.7%   |
| OTTMUSG00000015762 | 0.3033724   | 0.06 | 19.7%  |
| OTTMUSG00000015859 | 0           | 0.00 |        |
| OTTMUSG00000015915 | 0.00393682  | 0.01 | 223.6% |
| OTTMUSG00000016293 | 0           | 0.00 |        |
| OTTMUSG00000016406 | 0           | 0.00 |        |
| OTTMUSG00000016407 | 0           | 0.00 |        |
| OTTMUSG00000016411 | 0           | 0.00 |        |
| OTTMUSG00000016420 | 0           | 0.00 |        |
| OTTMUSG00000016437 | 0           | 0.00 |        |
| OTTMUSG00000016453 | 0           | 0.00 |        |
| OTTMUSG00000016571 | 2.10683     | 0.13 | 6.3%   |
| OTTMUSG00000016703 | 0           | 0.00 |        |
| OTTMUSG00000016790 | 0           | 0.00 |        |
| OTTMUSG00000017155 | 0           | 0.00 |        |

|                    |            |       |        |
|--------------------|------------|-------|--------|
| OTTMUSG00000017156 | 0          | 0.00  |        |
| OTTMUSG00000017866 | 0          | 0.00  |        |
| OTTMUSG00000019138 | 0          | 0.00  |        |
| OTTMUSG00000020946 | 0          | 0.00  |        |
| OTTMUSP00000006088 | 0.2399672  | 0.08  | 32.0%  |
| Otub1              | 179.8294   | 11.00 | 6.1%   |
| Otub2              | 3.875046   | 0.13  | 3.5%   |
| Otud4              | 7.37928    | 0.38  | 5.2%   |
| Otud5              | 15.83354   | 0.25  | 1.6%   |
| Otud6b             | 11.73314   | 0.41  | 3.5%   |
| Otud7a             | 6.245934   | 0.17  | 2.8%   |
| Otud7b             | 1.960376   | 0.21  | 11.0%  |
| Otx1               | 0.00967092 | 0.01  | 91.9%  |
| Otx2               | 0.04598858 | 0.04  | 93.6%  |
| Ovca2              | 0.9273828  | 0.08  | 8.8%   |
| Ovch2              | 0.00611218 | 0.01  | 137.6% |
| Ovgp1              | 1.6827192  | 0.63  | 37.6%  |
| Ovol1              | 0.08560758 | 0.03  | 33.2%  |
| Ovol2              | 0.05016234 | 0.02  | 39.4%  |
| Oxa1l              | 22.5448    | 1.13  | 5.0%   |
| Oxct1              | 192.1646   | 9.14  | 4.8%   |
| Oxct2a             | 0          | 0.00  |        |
| Oxct2b             | 0.02830264 | 0.03  | 110.0% |
| Oxgr1              | 0.00235958 | 0.01  | 223.6% |
| Oxnad1             | 5.308488   | 0.24  | 4.6%   |
| Oxr1               | 26.69282   | 2.55  | 9.6%   |
| Oxsm               | 4.62747    | 1.16  | 25.0%  |
| Oxsr1              | 8.043018   | 0.41  | 5.1%   |
| Oxt                | 0.06304074 | 0.04  | 68.4%  |
| Oxtr               | 0.3129566  | 0.03  | 9.8%   |
| p                  | 0.2904376  | 0.05  | 18.8%  |
| p130Cas            | 0.3036208  | 0.07  | 23.4%  |
| P140               | 40.80074   | 1.32  | 3.2%   |
| P2P-R              | 0.9821318  | 0.35  | 35.8%  |
| P2rx1              | 0.00571132 | 0.01  | 137.0% |
| P2rx2              | 0.06030338 | 0.03  | 42.1%  |
| P2rx3              | 0.9559836  | 0.10  | 10.2%  |
| P2rx4              | 3.835084   | 0.51  | 13.2%  |
| P2rx5              | 0.887761   | 0.09  | 9.7%   |
| P2rx7              | 0.07478684 | 0.02  | 25.6%  |
| P2rxl1             | 0.7136144  | 0.01  | 1.1%   |
| P2ry1              | 3.61597    | 0.10  | 2.8%   |
| P2ry10             | 0.00462888 | 0.01  | 223.6% |
| P2ry12             | 0.00612238 | 0.01  | 223.6% |
| P2ry13             | 0          | 0.00  |        |
| P2ry14             | 0.04972292 | 0.05  | 99.4%  |
| P2ry2              | 0.0910002  | 0.03  | 32.0%  |

|          |             |      |        |
|----------|-------------|------|--------|
| P2ry4    | 0.01581352  | 0.02 | 100.6% |
| P2ry5    | 0.7445002   | 0.06 | 7.5%   |
| P2ry6    | 0.01374398  | 0.02 | 116.9% |
| P42pop   | 14.20166    | 2.12 | 14.9%  |
| P4ha1    | 9.548194    | 1.70 | 17.8%  |
| P4ha2    | 7.94296     | 1.39 | 17.5%  |
| P4ha3    | 1.29521     | 0.07 | 5.2%   |
| P4hb     | 70.9532     | 4.00 | 5.6%   |
| p53      | 0.1674052   | 0.07 | 41.3%  |
| p62      | 0.3512766   | 0.17 | 48.0%  |
| P7       | 0.18607716  | 0.14 | 73.1%  |
| p73H     | 0.000669048 | 0.00 | 223.6% |
| pa       | 3.056214    | 0.93 | 30.4%  |
| Pa2g4    | 17.73926    | 1.13 | 6.4%   |
| Pabpc1   | 47.59164    | 3.53 | 7.4%   |
| Pabpc2   | 0           | 0.00 |        |
| Pabpc4   | 3.562082    | 0.18 | 5.1%   |
| Pabpc5   | 1.0883542   | 0.17 | 15.6%  |
| Pabpn1   | 40.04522    | 3.57 | 8.9%   |
| Pabpn11  | 0.00797168  | 0.01 | 137.4% |
| Pacrg    | 6.723572    | 0.43 | 6.4%   |
| Pacs1    | 40.0459     | 2.63 | 6.6%   |
| Pacs2    | 26.1762     | 0.62 | 2.4%   |
| Pacsin1  | 54.8153     | 5.01 | 9.1%   |
| Pacsin2  | 10.145054   | 0.38 | 3.7%   |
| Pacsin3  | 1.548342    | 0.33 | 21.2%  |
| Padi1    | 0           | 0.00 |        |
| Padi2    | 0.2508426   | 0.05 | 19.1%  |
| Padi3    | 0.00748842  | 0.01 | 96.5%  |
| Padi4    | 0           | 0.00 |        |
| Padi6    | 0           | 0.00 |        |
| Paf1     | 15.87272    | 0.80 | 5.0%   |
| Pafah1b1 | 164.9274    | 2.96 | 1.8%   |
| Pafah1b2 | 92.42458    | 3.57 | 3.9%   |
| Pafah1b3 | 21.7937     | 2.70 | 12.4%  |
| Pafah2   | 3.36764     | 0.26 | 7.8%   |
| Pag1     | 4.181578    | 0.34 | 8.2%   |
| Pah      | 0.0485038   | 0.03 | 60.5%  |
| Paics    | 21.74242    | 0.81 | 3.7%   |
| Paip1    | 21.9576     | 0.82 | 3.7%   |
| Paip2    | 115.1646    | 3.37 | 2.9%   |
| Paip2b   | 24.91364    | 1.00 | 4.0%   |
| Pak1     | 92.19654    | 3.36 | 3.6%   |
| Pak1ip1  | 11.69328    | 2.30 | 19.7%  |
| Pak2     | 8.907708    | 0.42 | 4.8%   |
| Pak3     | 33.8744     | 3.79 | 11.2%  |
| Pak4     | 1.212872    | 0.11 | 9.1%   |

|        |             |      |        |
|--------|-------------|------|--------|
| Pak6   | 6.32378     | 0.55 | 8.7%   |
| Pak7   | 2.46316     | 0.35 | 14.2%  |
| Paka   | 1.4431482   | 0.60 | 41.4%  |
| Palb2  | 0.3103464   | 0.06 | 19.0%  |
| Pald   | 1.360528    | 0.10 | 7.1%   |
| Palm   | 41.65088    | 3.04 | 7.3%   |
| Palm2  | 6.309846    | 0.59 | 9.4%   |
| Palmd  | 0.1815222   | 0.02 | 10.1%  |
| Pals1  | 0.463238    | 0.08 | 17.7%  |
| Pam    | 23.10958    | 2.06 | 8.9%   |
| Pamci  | 0.00529788  | 0.01 | 137.4% |
| Pan3   | 7.620298    | 0.18 | 2.4%   |
| Pank1  | 11.61752    | 0.66 | 5.7%   |
| Pank2  | 9.04396     | 0.33 | 3.6%   |
| Pank3  | 27.53698    | 1.19 | 4.3%   |
| Pank4  | 8.791322    | 0.58 | 6.6%   |
| Panx1  | 13.81014    | 2.04 | 14.8%  |
| Panx2  | 39.6257     | 2.79 | 7.0%   |
| Panx3  | 0           | 0.00 |        |
| Paox   | 1.209378    | 0.12 | 10.1%  |
| Pap    | 0           | 0.00 |        |
| Papd1  | 10.79846    | 0.20 | 1.8%   |
| Papd4  | 1.947588    | 0.15 | 7.6%   |
| Papd5  | 9.05624     | 0.39 | 4.3%   |
| PAPK-A | 10.575894   | 1.06 | 10.0%  |
| Papln  | 0.011332218 | 0.01 | 64.9%  |
| Papola | 22.93538    | 0.79 | 3.4%   |
| Papolb | 0.349275    | 0.03 | 9.4%   |
| Papolg | 6.6605      | 0.35 | 5.2%   |
| Pappa  | 0.5575828   | 0.11 | 19.3%  |
| Pappa2 | 0.16159756  | 0.17 | 105.0% |
| Papss1 | 26.26652    | 2.40 | 9.1%   |
| Papss2 | 0.599771    | 0.12 | 19.9%  |
| Paqr11 | 1.3107142   | 0.36 | 27.1%  |
| Paqr3  | 8.838216    | 1.00 | 11.3%  |
| Paqr4  | 16.3183     | 0.91 | 5.6%   |
| Paqr5  | 0.0205976   | 0.02 | 73.4%  |
| Paqr6  | 0.03745366  | 0.03 | 77.4%  |
| Paqr7  | 11.25144    | 0.65 | 5.8%   |
| Paqr8  | 14.49432    | 0.87 | 6.0%   |
| Paqr9  | 10.57386    | 0.44 | 4.1%   |
| Par3   | 0.630475    | 0.45 | 70.6%  |
| Parc   | 4.63036     | 0.24 | 5.1%   |
| Pard3  | 5.967582    | 0.21 | 3.5%   |
| Pard3b | 1.17891     | 0.12 | 10.1%  |
| Pard6a | 13.95952    | 0.79 | 5.6%   |
| Pard6b | 1.510396    | 0.26 | 17.2%  |

|        |             |      |       |
|--------|-------------|------|-------|
| Pard6g | 4.289408    | 0.45 | 10.6% |
| Parg   | 10.07937    | 0.26 | 2.5%  |
| Park2  | 4.23652     | 0.43 | 10.0% |
| Park7  | 67.2289     | 4.07 | 6.1%  |
| Parl   | 8.17536     | 0.71 | 8.7%  |
| Parn   | 11.40696    | 0.28 | 2.5%  |
| Parp1  | 15.75544    | 0.16 | 1.0%  |
| Parp11 | 12.44272    | 1.54 | 12.4% |
| Parp12 | 1.612532    | 0.11 | 7.0%  |
| Parp14 | 0.06716366  | 0.02 | 22.8% |
| Parp16 | 1.539188    | 0.16 | 10.6% |
| Parp2  | 5.58173     | 0.38 | 6.9%  |
| Parp3  | 0.335423    | 0.03 | 9.1%  |
| Parp4  | 0.3998484   | 0.07 | 17.8% |
| Parp6  | 42.3534     | 3.00 | 7.1%  |
| Parp8  | 9.965396    | 0.42 | 4.2%  |
| Parp9  | 0.3224998   | 0.09 | 28.8% |
| Pars2  | 2.474478    | 0.12 | 4.9%  |
| Parva  | 23.30874    | 1.02 | 4.4%  |
| Parvb  | 0.87511     | 0.09 | 10.4% |
| Parvg  | 0.0144225   | 0.01 | 75.1% |
| Pask   | 0.6425106   | 0.08 | 13.0% |
| PAT4   | 3.155264    | 1.33 | 42.0% |
| Patz1  | 8.06965     | 0.53 | 6.5%  |
| Pawr   | 0.8778968   | 0.08 | 9.4%  |
| Pax1   | 0.6687334   | 0.12 | 18.3% |
| Pax2   | 7.306668    | 0.28 | 3.9%  |
| Pax3   | 0.4296958   | 0.10 | 23.3% |
| Pax4   | 0.03881164  | 0.04 | 93.9% |
| Pax5   | 0.2041036   | 0.05 | 25.4% |
| Pax6   | 1.0117684   | 0.21 | 20.3% |
| Pax7   | 0.006101302 | 0.01 | 97.5% |
| Pax8   | 1.63045     | 0.09 | 5.3%  |
| Pax9   | 0.1718938   | 0.03 | 20.0% |
| Paxip1 | 7.004978    | 0.42 | 6.0%  |
| Pb1    | 10.61545    | 0.97 | 9.1%  |
| Pbef1  | 25.1437     | 0.71 | 2.8%  |
| Pbk    | 0.79781     | 0.26 | 32.0% |
| Pbld   | 0.03266398  | 0.02 | 71.9% |
| Pbp2   | 0.0435349   | 0.04 | 82.3% |
| Pbrm1  | 13.70046    | 1.24 | 9.0%  |
| Pbsn   | 0           | 0.00 |       |
| Pbx1   | 21.2086     | 1.33 | 6.3%  |
| PBX1a  | 0.04471788  | 0.03 | 67.1% |
| Pbx2   | 13.8685     | 0.95 | 6.8%  |
| Pbx3   | 56.30298    | 6.11 | 10.9% |
| PBX3   | 0.05109588  | 0.04 | 77.1% |

|         |           |      |       |
|---------|-----------|------|-------|
| Pbx4    | 5.700192  | 0.38 | 6.7%  |
| Pbxip1  | 3.494806  | 0.32 | 9.1%  |
| Pcaf    | 1.952754  | 0.14 | 7.2%  |
| Pcbd1   | 0.9438948 | 0.28 | 29.9% |
| Pcbd2   | 4.506486  | 0.53 | 11.8% |
| Pcbp1   | 57.20816  | 5.55 | 9.7%  |
| Pcbp2   | 95.3726   | 5.75 | 6.0%  |
| Pcbp3   | 22.40488  | 1.12 | 5.0%  |
| Pcbp4   | 42.25562  | 2.74 | 6.5%  |
| Pcca    | 10.44494  | 0.80 | 7.7%  |
| Pccb    | 19.53958  | 0.66 | 3.4%  |
| Pcdh1   | 18.32994  | 0.78 | 4.3%  |
| Pcdh10  | 26.26274  | 1.42 | 5.4%  |
| Pcdh11x | 10.409458 | 0.58 | 5.6%  |
| Pcdh12  | 0.0437581 | 0.02 | 43.0% |
| Pcdh15  | 1.88879   | 0.19 | 10.2% |
| Pcdh17  | 17.70384  | 1.25 | 7.0%  |
| Pcdh18  | 5.197954  | 0.37 | 7.2%  |
| Pcdh19  | 7.176522  | 0.83 | 11.6% |
| Pcdh20  | 2.236122  | 0.24 | 10.8% |
| Pcdh21  | 0.5490102 | 0.12 | 21.3% |
| Pcdh7   | 27.76064  | 1.37 | 4.9%  |
| Pcdh8   | 13.56662  | 1.12 | 8.3%  |
| Pcdh9   | 23.88472  | 0.93 | 3.9%  |
| Pcdha1  | 6.63034   | 1.85 | 28.0% |
| Pcdha10 | 1.2347206 | 0.29 | 23.2% |
| Pcdha11 | 2.74841   | 2.22 | 80.9% |
| Pcdha12 | 3.299932  | 0.54 | 16.4% |
| Pcdha2  | 4.082304  | 0.43 | 10.5% |
| Pcdha3  | 8.782036  | 0.96 | 10.9% |
| Pcdha4  | 7.92817   | 2.12 | 26.7% |
| Pcdha5  | 3.770834  | 0.33 | 8.7%  |
| Pcdha6  | 0.2710006 | 0.10 | 35.4% |
| Pcdha7  | 0.3630884 | 0.13 | 36.2% |
| Pcdha8  | 0.0629176 | 0.02 | 26.6% |
| Pcdha9  | 2.128578  | 0.45 | 21.1% |
| Pcdhac1 | 0.2521512 | 0.09 | 34.3% |
| Pcdhac2 | 16.05558  | 0.74 | 4.6%  |
| Pcdhb1  | 0.3337658 | 0.08 | 25.3% |
| Pcdhb10 | 3.286606  | 0.29 | 8.8%  |
| Pcdhb11 | 4.500502  | 0.35 | 7.7%  |
| Pcdhb12 | 0.7790816 | 0.13 | 16.6% |
| Pcdhb13 | 1.167968  | 0.13 | 10.8% |
| Pcdhb14 | 2.002424  | 0.15 | 7.4%  |
| Pcdhb15 | 0.5159198 | 0.10 | 18.8% |
| Pcdhb16 | 2.036968  | 0.16 | 8.0%  |
| Pcdhb17 | 2.664198  | 0.23 | 8.5%  |



|          |           |      |       |
|----------|-----------|------|-------|
| Pcdhb18  | 1.653396  | 0.13 | 8.0%  |
| Pcdhb19  | 2.46435   | 0.25 | 10.0% |
| Pcdhb2   | 5.535988  | 0.63 | 11.4% |
| Pcdhb20  | 3.709402  | 0.14 | 3.8%  |
| Pcdhb21  | 0.8353146 | 0.11 | 13.2% |
| Pcdhb3   | 4.896458  | 0.35 | 7.1%  |
| Pcdhb4   | 0.3455082 | 0.06 | 18.6% |
| Pcdhb5   | 2.716722  | 0.18 | 6.6%  |
| Pcdhb6   | 3.965778  | 0.37 | 9.2%  |
| Pcdhb7   | 4.954098  | 0.34 | 6.9%  |
| Pcdhb8   | 2.175992  | 0.30 | 13.6% |
| Pcdhb9   | 2.701288  | 0.32 | 11.9% |
| Pcdhga1  | 1.595454  | 0.13 | 8.1%  |
| Pcdhga10 | 1.306854  | 0.12 | 9.2%  |
| Pcdhga11 | 1.854894  | 0.16 | 8.8%  |
| Pcdhga12 | 0.5954548 | 0.11 | 18.8% |
| Pcdhga2  | 4.345996  | 0.23 | 5.2%  |
| Pcdhga3  | 5.209336  | 0.31 | 5.9%  |
| Pcdhga4  | 2.32067   | 0.24 | 10.5% |
| Pcdhga5  | 3.61802   | 0.34 | 9.3%  |
| Pcdhga6  | 1.623116  | 0.33 | 20.6% |
| Pcdhga7  | 4.503896  | 0.28 | 6.1%  |
| Pcdhga8  | 1.2801802 | 0.28 | 21.8% |
| Pcdhga9  | 1.433326  | 0.16 | 11.5% |
| Pcdhgb1  | 0.5272804 | 0.03 | 5.0%  |
| Pcdhgb2  | 0.5051554 | 0.10 | 20.6% |
| Pcdhgb4  | 2.10425   | 0.28 | 13.2% |
| Pcdhgb5  | 2.698868  | 0.21 | 7.9%  |
| Pcdhgb6  | 2.079068  | 0.29 | 13.8% |
| Pcdhgb7  | 1.0577344 | 0.22 | 20.8% |
| Pcdhgb8  | 0.9220836 | 0.28 | 29.9% |
| Pcdhgc3  | 11.296778 | 1.03 | 9.1%  |
| Pcdhgc4  | 17.59488  | 0.94 | 5.4%  |
| Pcdhgc5  | 0.9426982 | 0.08 | 8.6%  |
| PCDHX    | 17.29616  | 2.54 | 14.7% |
| Pcf11    | 7.852724  | 1.07 | 13.6% |
| Pcgf1    | 3.700634  | 0.76 | 20.6% |
| Pcgf2    | 11.40342  | 1.10 | 9.7%  |
| Pcgf3    | 12.10396  | 1.35 | 11.1% |
| Pcgf5    | 2.324384  | 0.38 | 16.3% |
| Pcgf6    | 9.990638  | 0.50 | 5.0%  |
| Pcid2    | 9.557864  | 0.43 | 4.5%  |
| Pck1     | 0         | 0.00 |       |
| Pck2     | 5.164956  | 0.24 | 4.6%  |
| Pclo     | 9.378232  | 0.79 | 8.4%  |
| Pcm1     | 21.37368  | 1.52 | 7.1%  |
| pcm-1    | 5.97584   | 0.73 | 12.2% |

|          |             |       |        |
|----------|-------------|-------|--------|
| Pcmt1    | 81.54968    | 3.37  | 4.1%   |
| Pcmt1d1  | 20.69748    | 0.45  | 2.2%   |
| Pcmt1d2  | 13.05196    | 1.38  | 10.5%  |
| Pcna     | 6.875686    | 0.82  | 12.0%  |
| Pcnp     | 16.59222    | 0.56  | 3.4%   |
| Pcnt     | 1.1129934   | 0.14  | 12.2%  |
| PCNT2    | 0.0269832   | 0.01  | 18.9%  |
| Pcnx     | 8.749894    | 0.41  | 4.7%   |
| Pcnx12   | 4.266194    | 0.26  | 6.1%   |
| Pcnx13   | 17.53786    | 0.94  | 5.4%   |
| Pcolce   | 6.744094    | 1.60  | 23.7%  |
| Pcolce2  | 0.612433    | 0.13  | 20.4%  |
| Pcp2     | 3.3930766   | 3.18  | 93.8%  |
| Pcp4     | 119.1548    | 13.75 | 11.5%  |
| Pcp4l1   | 23.99974    | 2.89  | 12.0%  |
| Pcqap    | 0.6865598   | 0.21  | 31.0%  |
| Pcsk1    | 3.625024    | 0.40  | 11.0%  |
| Pcsk1n   | 181.2214    | 29.12 | 16.1%  |
| Pcsk2    | 65.59596    | 1.98  | 3.0%   |
| Pcsk4    | 2.62591     | 0.22  | 8.3%   |
| Pcsk5    | 6.565       | 0.41  | 6.2%   |
| Pcsk6    | 2.368492    | 0.12  | 5.2%   |
| Pcsk7    | 4.606582    | 0.70  | 15.3%  |
| Pcsk9    | 0.012381734 | 0.01  | 81.1%  |
| Pctk1    | 91.75878    | 2.25  | 2.4%   |
| Pctk2    | 15.51602    | 0.75  | 4.8%   |
| Pctk3    | 0.5423258   | 0.21  | 38.4%  |
| Pctp     | 0.1646255   | 0.05  | 32.3%  |
| Pcx      | 19.57944    | 2.30  | 11.8%  |
| Pcyox1   | 39.39778    | 1.02  | 2.6%   |
| Pcyox1l  | 12.92836    | 1.31  | 10.2%  |
| Pcyt1a   | 12.14446    | 0.46  | 3.8%   |
| Pcyt1b   | 18.88454    | 0.92  | 4.8%   |
| Pcyt2    | 32.17044    | 1.44  | 4.5%   |
| Pdap1    | 29.06844    | 2.50  | 8.6%   |
| Pdc      | 0           | 0.00  |        |
| Pdcd1    | 0           | 0.00  |        |
| Pdcd10   | 8.510392    | 0.40  | 4.7%   |
| Pdcd11   | 6.79809     | 0.31  | 4.6%   |
| Pdcd1lg2 | 0.00413134  | 0.01  | 223.6% |
| Pdcd2    | 7.385908    | 0.55  | 7.4%   |
| Pdcd2l   | 7.817534    | 0.82  | 10.4%  |
| Pdcd4    | 44.32152    | 3.77  | 8.5%   |
| Pdcd5    | 0.449516    | 0.12  | 26.8%  |
| Pdcd6    | 22.31106    | 1.03  | 4.6%   |
| Pdcd6ip  | 20.75364    | 1.19  | 5.7%   |
| Pdcd7    | 8.48648     | 0.58  | 6.9%   |

|         |            |      |        |
|---------|------------|------|--------|
| Pdcl    | 8.62866    | 0.31 | 3.6%   |
| Pdcl2   | 0          | 0.00 |        |
| Pdcl3   | 16.4834    | 0.99 | 6.0%   |
| Pddc1   | 15.8905    | 0.65 | 4.1%   |
| Pde10a  | 11.86212   | 0.74 | 6.3%   |
| Pde11a  | 0.1800108  | 0.06 | 31.0%  |
| Pde1a   | 1.0658316  | 0.09 | 8.8%   |
| Pde1b   | 24.82196   | 1.80 | 7.3%   |
| Pde1c   | 1.31512    | 0.18 | 13.6%  |
| Pde2a   | 3.126208   | 0.45 | 14.5%  |
| Pde3a   | 3.162728   | 0.22 | 6.8%   |
| Pde3b   | 2.335754   | 0.18 | 7.9%   |
| Pde4a   | 13.2226    | 1.71 | 13.0%  |
| Pde4b   | 16.73538   | 0.85 | 5.1%   |
| Pde4c   | 0.01390544 | 0.01 | 64.6%  |
| Pde4d   | 13.66448   | 0.49 | 3.6%   |
| Pde4dip | 19.98632   | 0.98 | 4.9%   |
| Pde5a   | 0.9795288  | 0.22 | 22.6%  |
| Pde6a   | 0.04100336 | 0.02 | 53.9%  |
| Pde6b   | 0.0104551  | 0.01 | 137.0% |
| Pde6c   | 0.00209528 | 0.00 | 223.6% |
| Pde6d   | 24.63552   | 1.48 | 6.0%   |
| Pde6g   | 0.1827674  | 0.03 | 17.1%  |
| Pde6h   | 0.1271532  | 0.02 | 15.8%  |
| Pde7a   | 5.219504   | 0.49 | 9.3%   |
| Pde7b   | 0.6169592  | 0.15 | 24.7%  |
| Pde8a   | 0.5097706  | 0.06 | 11.5%  |
| Pde8b   | 8.996566   | 0.75 | 8.3%   |
| Pde9a   | 2.031354   | 0.29 | 14.3%  |
| Pdgfa   | 15.1619    | 0.47 | 3.1%   |
| Pdgfb   | 4.215982   | 0.47 | 11.1%  |
| Pdgfc   | 1.279796   | 0.15 | 11.5%  |
| Pdgfd   | 0.2163778  | 0.04 | 20.4%  |
| Pdgfra  | 8.022148   | 1.34 | 16.7%  |
| Pdgfrb  | 3.529026   | 0.52 | 14.6%  |
| Pdgfrl  | 1.537714   | 0.28 | 18.3%  |
| Pdha1   | 91.53872   | 3.63 | 4.0%   |
| Pdha2   | 0.10453304 | 0.04 | 39.7%  |
| Pdha    | 37.89004   | 1.16 | 3.1%   |
| Pdhx    | 25.7604    | 1.38 | 5.3%   |
| Pdia2   | 0.01139768 | 0.01 | 94.6%  |
| Pdia3   | 93.924     | 4.62 | 4.9%   |
| Pdia4   | 25.5739    | 1.56 | 6.1%   |
| Pdia5   | 1.896064   | 0.29 | 15.2%  |
| Pdia6   | 37.93386   | 1.65 | 4.4%   |
| Pdik1l  | 6.470966   | 0.46 | 7.1%   |
| Pdk1    | 10.147876  | 1.71 | 16.8%  |

|          |            |       |       |
|----------|------------|-------|-------|
| Pdk2     | 14.0954    | 2.21  | 15.7% |
| Pdk3     | 7.78361    | 0.62  | 8.0%  |
| Pdk4     | 0.2223936  | 0.04  | 18.6% |
| Pdlim1   | 0.8900232  | 0.19  | 21.2% |
| Pdlim2   | 0.6359272  | 0.19  | 30.5% |
| Pdlim3   | 0.2107497  | 0.11  | 53.5% |
| Pdlim4   | 1.0661626  | 0.16  | 15.4% |
| Pdlim5   | 5.08807    | 0.31  | 6.0%  |
| Pdlim7   | 19.22788   | 1.71  | 8.9%  |
| Pdpk1    | 18.2972    | 0.35  | 1.9%  |
| Pdpn     | 6.28897    | 1.19  | 18.9% |
| Pdrg1    | 31.7768    | 1.16  | 3.6%  |
| Pds5a    | 7.843834   | 0.59  | 7.5%  |
| Pds5b    | 21.18524   | 0.72  | 3.4%  |
| Pdss1    | 2.943992   | 0.23  | 7.7%  |
| Pdss2    | 4.432872   | 0.42  | 9.5%  |
| Pdx1     | 0.00933412 | 0.01  | 92.8% |
| Pdxdc1   | 25.92382   | 0.57  | 2.2%  |
| Pdxk     | 35.19432   | 1.89  | 5.4%  |
| Pdxp     | 71.00102   | 4.66  | 6.6%  |
| Pdyn     | 0.3627074  | 0.06  | 15.9% |
| Pdzd11   | 9.357534   | 0.91  | 9.7%  |
| Pdzd2    | 6.765812   | 0.69  | 10.1% |
| Pdzd3    | 0.0158059  | 0.01  | 90.9% |
| Pdzd4    | 20.5311    | 0.76  | 3.7%  |
| Pdzd6    | 0.06256876 | 0.06  | 88.1% |
| Pdzd7    | 2.0863282  | 1.05  | 50.6% |
| Pdzd8    | 26.955     | 0.68  | 2.5%  |
| Pdzk1    | 1.776      | 0.10  | 5.8%  |
| Pdzk1ip1 | 0.02280632 | 0.01  | 59.6% |
| Pdzrn3   | 2.562542   | 0.26  | 10.3% |
| Pdzrn4   | 5.368876   | 0.51  | 9.4%  |
| Pdzx     | 0          | 0.00  |       |
| PE1      | 0.408735   | 0.05  | 12.2% |
| Pea15a   | 93.1581    | 4.87  | 5.2%  |
| Pea15b   | 0          | 0.00  |       |
| Pebp1    | 49.3268    | 2.62  | 5.3%  |
| Pecam1   | 0.1685808  | 0.05  | 27.0% |
| Peci     | 11.22052   | 0.85  | 7.5%  |
| Pecr     | 2.389742   | 0.21  | 8.6%  |
| Pef1     | 23.3797    | 1.09  | 4.7%  |
| Peg10    | 63.00664   | 3.32  | 5.3%  |
| Peg12    | 0.540167   | 0.10  | 18.5% |
| Peg3     | 143.5834   | 11.98 | 8.3%  |
| Peg5     | 1.887448   | 0.61  | 32.4% |
| Peli1    | 6.03074    | 0.42  | 6.9%  |
| Peli2    | 4.463794   | 0.17  | 3.9%  |

|         |            |      |        |
|---------|------------|------|--------|
| Peli3   | 6.58544    | 0.48 | 7.3%   |
| Pelo    | 5.699314   | 0.30 | 5.2%   |
| Pelota  | 0.392619   | 0.27 | 69.5%  |
| Pelp1   | 14.68632   | 1.53 | 10.4%  |
| Pemt    | 2.233918   | 0.15 | 6.6%   |
| Penk1   | 50.94656   | 4.69 | 9.2%   |
| Peo1    | 5.444588   | 0.36 | 6.7%   |
| Pepd    | 15.00842   | 0.98 | 6.5%   |
| Per1    | 4.83118    | 0.58 | 12.0%  |
| Per2    | 1.966994   | 0.22 | 11.3%  |
| Per3    | 3.81863    | 0.41 | 10.8%  |
| Perld1  | 2.133896   | 0.19 | 8.9%   |
| Perp    | 3.266054   | 0.51 | 15.7%  |
| Perq1   | 17.35484   | 1.57 | 9.1%   |
| Pes1    | 6.650636   | 0.40 | 6.0%   |
| Pet112l | 2.513292   | 0.22 | 8.7%   |
| Pet2    | 0          | 0.00 |        |
| Pex1    | 4.647928   | 1.30 | 27.9%  |
| Pex10   | 3.881374   | 0.15 | 3.8%   |
| Pex11a  | 1.554164   | 0.10 | 6.6%   |
| Pex11b  | 14.80192   | 0.81 | 5.5%   |
| Pex11c  | 0.22262678 | 0.13 | 57.0%  |
| Pex11g  | 0.1638544  | 0.19 | 115.7% |
| Pex12   | 4.067904   | 0.17 | 4.3%   |
| Pex13   | 4.8703     | 1.24 | 25.5%  |
| Pex14   | 17.31994   | 0.67 | 3.9%   |
| Pex16   | 7.495388   | 0.60 | 8.0%   |
| Pex19   | 49.9375    | 2.50 | 5.0%   |
| Pex2    | 10.680376  | 0.92 | 8.6%   |
| Pex26   | 6.374894   | 0.57 | 8.9%   |
| Pex3    | 7.538478   | 0.56 | 7.5%   |
| Pex5    | 20.97662   | 0.81 | 3.9%   |
| Pex6    | 12.65522   | 0.37 | 2.9%   |
| Pex7    | 11.0968    | 0.44 | 3.9%   |
| Pfas    | 2.839398   | 0.41 | 14.4%  |
| Pfdn1   | 30.46608   | 1.64 | 5.4%   |
| Pfdn2   | 36.29056   | 2.13 | 5.9%   |
| Pfdn4   | 18.56704   | 1.51 | 8.1%   |
| Pfdn5   | 30.18414   | 2.12 | 7.0%   |
| Pfkfb1  | 0.4577898  | 0.12 | 26.7%  |
| Pfkfb2  | 6.756178   | 0.50 | 7.4%   |
| Pfkfb3  | 11.813738  | 2.12 | 17.9%  |
| Pfkfb4  | 2.86128    | 0.19 | 6.7%   |
| Pfkl    | 25.8053    | 3.66 | 14.2%  |
| Pfkm    | 80.42926   | 2.69 | 3.4%   |
| Pfkp    | 94.70442   | 4.02 | 4.2%   |
| Pfn1    | 80.17346   | 4.82 | 6.0%   |

|         |             |       |        |
|---------|-------------|-------|--------|
| Pfn2    | 371.5392    | 12.39 | 3.3%   |
| Pfn3    | 0.000382184 | 0.00  | 223.6% |
| Pfn4    | 3.781802    | 0.44  | 11.7%  |
| Pfpl    | 0.0022803   | 0.01  | 223.6% |
| Pftk1   | 58.51806    | 3.29  | 5.6%   |
| Pga5    | 2.99845     | 0.72  | 23.9%  |
| Pgam1   | 21.30554    | 1.64  | 7.7%   |
| Pgam2   | 1.799262    | 0.10  | 5.7%   |
| Pgam5   | 25.06844    | 1.31  | 5.2%   |
| Pgbd1   | 0.2757362   | 0.06  | 23.1%  |
| Pgbd5   | 10.602556   | 0.55  | 5.1%   |
| Pgc     | 3.391166    | 0.89  | 26.2%  |
| PGC-1v  | 4.228704    | 0.71  | 16.8%  |
| Pgcp    | 0.13962956  | 0.08  | 58.1%  |
| Pgd     | 24.953      | 2.03  | 8.2%   |
| Pgf     | 0.08695248  | 0.02  | 27.8%  |
| Pggt1b  | 6.351188    | 0.41  | 6.4%   |
| Pgk1    | 15.77962    | 1.10  | 7.0%   |
| Pgk2    | 0           | 0.00  |        |
| Pgls    | 1.0282928   | 0.09  | 8.3%   |
| Pglyrp1 | 0.15912214  | 0.06  | 40.4%  |
| Pglyrp2 | 0           | 0.00  |        |
| Pglyrp3 | 0.0051069   | 0.01  | 223.6% |
| Pglyrp4 | 0           | 0.00  |        |
| Pgm1    | 2.99903     | 0.20  | 6.7%   |
| Pgm2    | 18.09202    | 1.01  | 5.6%   |
| Pgm2l1  | 47.99618    | 2.91  | 6.1%   |
| Pgm3    | 4.967206    | 0.35  | 7.0%   |
| Pgm5    | 2.226792    | 0.19  | 8.7%   |
| Pgpep1  | 4.565736    | 0.33  | 7.2%   |
| Pgr     | 5.028944    | 0.26  | 5.1%   |
| Pgr15l  | 0.7923978   | 0.10  | 13.1%  |
| Pgrmc1  | 180.3386    | 4.93  | 2.7%   |
| Pgrmc2  | 21.65998    | 0.28  | 1.3%   |
| Pgs1    | 21.84044    | 12.25 | 56.1%  |
| Phactr1 | 23.88986    | 1.13  | 4.7%   |
| Phactr2 | 2.637882    | 0.11  | 4.3%   |
| Phactr3 | 6.291944    | 0.22  | 3.5%   |
| Phactr4 | 1.505578    | 0.09  | 6.2%   |
| Phb     | 10.705268   | 0.96  | 9.0%   |
| Phb2    | 43.68       | 3.35  | 7.7%   |
| Phc1    | 9.29286     | 0.37  | 4.0%   |
| Phc2    | 9.682       | 0.56  | 5.8%   |
| Phc3    | 4.730864    | 0.46  | 9.8%   |
| Phca    | 5.941268    | 0.61  | 10.3%  |
| Phemx   | 0.00263202  | 0.00  | 158.2% |
| Phex    | 0.05594514  | 0.02  | 30.1%  |

|          |            |      |       |
|----------|------------|------|-------|
| Phf1     | 6.084384   | 1.06 | 17.4% |
| Phf10    | 8.966056   | 2.40 | 26.7% |
| Phf11    | 0          | 0.00 |       |
| Phf12    | 9.268046   | 0.34 | 3.7%  |
| Phf13    | 7.099498   | 0.25 | 3.5%  |
| Phf14    | 7.278548   | 0.62 | 8.5%  |
| Phf15    | 5.151232   | 0.34 | 6.5%  |
| Phf16    | 0.737482   | 0.15 | 20.9% |
| Phf17    | 5.478576   | 0.42 | 7.7%  |
| Phf19    | 0.3522718  | 0.05 | 13.0% |
| Phf2     | 7.403086   | 0.26 | 3.6%  |
| Phf20    | 8.207762   | 0.37 | 4.5%  |
| Phf20l1  | 13.53562   | 1.28 | 9.4%  |
| Phf21a   | 6.802244   | 0.55 | 8.0%  |
| Phf21b   | 0.7941738  | 0.13 | 16.2% |
| Phf23    | 12.1425    | 0.42 | 3.4%  |
| Phf3     | 8.104614   | 0.28 | 3.5%  |
| Phf5a    | 14.8129    | 1.78 | 12.0% |
| Phf6     | 9.109522   | 0.64 | 7.1%  |
| Phf7     | 1.678164   | 0.12 | 7.3%  |
| Phf8     | 6.197674   | 0.50 | 8.0%  |
| Phgdh    | 3.337376   | 0.72 | 21.5% |
| Phip     | 8.662176   | 1.44 | 16.6% |
| Phka1    | 3.669664   | 0.27 | 7.5%  |
| Phka2    | 4.071768   | 0.35 | 8.5%  |
| Phkb     | 9.48656    | 0.38 | 4.0%  |
| Phkg1    | 0.6875238  | 0.08 | 12.3% |
| Phkg2    | 21.7814    | 0.45 | 2.1%  |
| Phlda1   | 5.311942   | 0.51 | 9.7%  |
| Phlda2   | 0.02069908 | 0.02 | 95.7% |
| Phlda3   | 21.3933    | 0.92 | 4.3%  |
| Phldb1   | 3.948176   | 0.27 | 6.9%  |
| Phldb2   | 0.7855528  | 0.11 | 14.2% |
| Phldb3   | 0.04735906 | 0.04 | 79.6% |
| Phlpp    | 7.610326   | 0.19 | 2.4%  |
| Phlppl   | 8.344658   | 0.88 | 10.5% |
| Phospho1 | 6.209658   | 1.15 | 18.6% |
| Phospho2 | 10.226682  | 0.33 | 3.2%  |
| Phox2a   | 1.0333944  | 0.26 | 25.1% |
| Phox2b   | 0.04814382 | 0.03 | 59.3% |
| Phpt1    | 46.79796   | 3.15 | 6.7%  |
| Phr1     | 27.99352   | 1.74 | 6.2%  |
| Phtf1    | 5.031568   | 0.36 | 7.1%  |
| Phtf2    | 7.799846   | 0.75 | 9.7%  |
| Phxr1    | 0          | 0.00 |       |
| Phxr4    | 0          | 0.00 |       |
| Phyh     | 12.99708   | 0.52 | 4.0%  |

|            |            |      |       |
|------------|------------|------|-------|
| Phyhd1     | 1.27005    | 0.13 | 10.5% |
| Phyhip     | 17.14882   | 1.36 | 7.9%  |
| Phyhipl    | 64.6304    | 4.63 | 7.2%  |
| Pi15       | 0.8572968  | 0.27 | 31.6% |
| Pi16       | 0.2137364  | 0.05 | 24.7% |
| Pi4k2a     | 24.3188    | 0.57 | 2.3%  |
| Pi4k2b     | 0.693234   | 0.13 | 19.1% |
| Pi4ka      | 31.2026    | 2.07 | 6.6%  |
| Pi4kb      | 11.13322   | 0.39 | 3.5%  |
| Pias1      | 14.87502   | 0.61 | 4.1%  |
| Pias2      | 17.36578   | 0.64 | 3.7%  |
| Pias3      | 4.790154   | 0.19 | 4.0%  |
| Pias4      | 6.339194   | 0.16 | 2.5%  |
| PIAS-gamma | 0.3901166  | 0.10 | 26.5% |
| Pib5pa     | 10.87268   | 0.64 | 5.9%  |
| Picalm     | 51.89904   | 1.80 | 3.5%  |
| Pick1      | 22.62238   | 2.36 | 10.4% |
| PICOT      | 0.3335252  | 0.06 | 18.3% |
| Pif1       | 0.20231046 | 0.10 | 50.3% |
| Piga       | 1.923754   | 0.22 | 11.5% |
| Pigb       | 3.356292   | 0.32 | 9.6%  |
| Pigc       | 3.947556   | 0.24 | 6.1%  |
| Pigf       | 5.589148   | 0.40 | 7.1%  |
| Pigg       | 5.101588   | 0.24 | 4.6%  |
| Pigh       | 3.889394   | 0.09 | 2.4%  |
| Pigk       | 17.27768   | 0.62 | 3.6%  |
| Pigl       | 1.954896   | 0.18 | 9.4%  |
| Pigm       | 2.999284   | 0.18 | 5.9%  |
| Pign       | 2.652948   | 0.34 | 12.7% |
| Pig-n      | 0.05579322 | 0.03 | 46.8% |
| Pigo       | 8.15481    | 0.20 | 2.5%  |
| Pigp       | 14.78398   | 2.67 | 18.1% |
| Pigq       | 39.68682   | 1.82 | 4.6%  |
| Pigr       | 0.05864782 | 0.02 | 36.2% |
| Pigs       | 25.60362   | 1.62 | 6.3%  |
| Pigt       | 53.52474   | 5.91 | 11.0% |
| Pigu       | 18.84736   | 1.56 | 8.3%  |
| Pigv       | 3.647708   | 0.21 | 5.7%  |
| Pigw       | 2.643198   | 0.32 | 12.3% |
| Pigx       | 5.647698   | 0.70 | 12.5% |
| Pigy       | 5.945018   | 0.15 | 2.5%  |
| Pigyl      | 10.21325   | 0.69 | 6.8%  |
| Pigz       | 1.310344   | 0.39 | 30.0% |
| Pih1d1     | 18.06812   | 3.65 | 20.2% |
| Pih1d2     | 0.2119202  | 0.08 | 39.9% |
| Pik3ap1    | 0.04186708 | 0.02 | 43.0% |
| Pik3c2a    | 3.33498    | 0.15 | 4.5%  |



|         |             |      |        |
|---------|-------------|------|--------|
| Pik3c2b | 1.42911     | 0.11 | 8.0%   |
| Pik3c2g | 0.042141994 | 0.03 | 78.1%  |
| Pik3c3  | 9.116894    | 0.58 | 6.3%   |
| Pik3ca  | 16.05738    | 1.21 | 7.5%   |
| Pik3cb  | 8.573044    | 0.17 | 2.0%   |
| Pik3cd  | 2.395678    | 0.22 | 9.2%   |
| Pik3cg  | 0.001268472 | 0.00 | 223.6% |
| Pik3ip1 | 9.372722    | 2.11 | 22.5%  |
| Pik3r1  | 45.4527     | 1.59 | 3.5%   |
| Pik3r2  | 18.38218    | 1.03 | 5.6%   |
| Pik3r3  | 17.37818    | 1.10 | 6.3%   |
| Pik3r4  | 8.200754    | 0.50 | 6.1%   |
| Pik3r5  | 0.0579926   | 0.01 | 20.5%  |
| Pik4ca  | 9.46739     | 0.71 | 7.5%   |
| Pilra   | 0.067121    | 0.08 | 114.6% |
| Pilrb1  | 0           | 0.00 |        |
| Pilrb2  | 0           | 0.00 |        |
| Pim1    | 1.717414    | 0.16 | 9.5%   |
| Pim2    | 10.011158   | 0.68 | 6.8%   |
| Pim3    | 12.4098     | 1.60 | 12.9%  |
| Pin1    | 13.98796    | 1.06 | 7.6%   |
| Pin4    | 0.427388    | 0.22 | 50.7%  |
| Pink1   | 48.98274    | 3.65 | 7.5%   |
| PINK1   | 0.1575996   | 0.07 | 45.2%  |
| Pip     | 0           | 0.00 |        |
| Pip4k2a | 9.342846    | 0.99 | 10.5%  |
| Pip4k2b | 32.57694    | 1.15 | 3.5%   |
| Pip4k2c | 10.572964   | 0.66 | 6.2%   |
| Pip5k1a | 11.81566    | 0.88 | 7.5%   |
| Pip5k1b | 2.596956    | 0.29 | 11.3%  |
| Pip5k1c | 46.39676    | 0.93 | 2.0%   |
| Pip5k3  | 7.237466    | 2.49 | 34.4%  |
| Pip5kl1 | 5.395348    | 0.30 | 5.5%   |
| Pipox   | 0.6806252   | 0.06 | 8.5%   |
| Pir     | 0.3711022   | 0.05 | 14.7%  |
| Pira1   | 0           | 0.00 |        |
| Pira11  | 0           | 0.00 |        |
| Pira2   | 0           | 0.00 |        |
| Pira3   | 0           | 0.00 |        |
| Pira4   | 0           | 0.00 |        |
| Pira6   | 0           | 0.00 |        |
| Pirb    | 0           | 0.00 |        |
| Pisd    | 35.18242    | 2.38 | 6.8%   |
| Pitpna  | 83.9069     | 1.63 | 1.9%   |
| Pitpnb  | 23.40094    | 1.25 | 5.3%   |
| Pitpnc1 | 14.30224    | 0.88 | 6.1%   |
| Pitpnm1 | 38.77862    | 2.04 | 5.3%   |

|          |             |       |        |
|----------|-------------|-------|--------|
| Pitpnm2  | 11.92682    | 0.32  | 2.7%   |
| Pitpnm3  | 4.797774    | 0.30  | 6.3%   |
| Pitrm1   | 10.39678    | 0.12  | 1.2%   |
| Pitx1    | 0.4558926   | 0.15  | 32.9%  |
| Pitx2    | 0.460754    | 0.17  | 37.3%  |
| Pitx3    | 0.08877874  | 0.06  | 68.9%  |
| Piwil1   | 0.000796832 | 0.00  | 223.6% |
| Piwil2   | 0.2065288   | 0.01  | 7.1%   |
| Piwil4   | 0.00215016  | 0.00  | 223.6% |
| piwiL4   | 0.000995334 | 0.00  | 223.6% |
| Pja1     | 71.23906    | 3.36  | 4.7%   |
| Pja2     | 169.9828    | 4.63  | 2.7%   |
| Pkd1     | 5.347918    | 1.16  | 21.7%  |
| Pkd1l1   | 0.01926006  | 0.03  | 137.7% |
| Pkd1l2   | 0.002152734 | 0.00  | 153.0% |
| Pkd1l3   | 0.26929088  | 0.29  | 106.4% |
| PKD1L3   | 0.0099087   | 0.02  | 223.6% |
| Pkd2     | 3.13032     | 0.22  | 7.0%   |
| Pkd2l1   | 0.03908444  | 0.01  | 37.1%  |
| Pkd2l2   | 3.026025    | 4.83  | 159.6% |
| Pkdrej   | 0.008540908 | 0.01  | 127.3% |
| Pkhd1    | 0.01439428  | 0.01  | 35.9%  |
| Pkhd1l1  | 0.011087558 | 0.01  | 97.7%  |
| Pkia     | 122.587     | 4.49  | 3.7%   |
| Pkib     | 0.576634    | 0.11  | 19.9%  |
| Pkig     | 8.990564    | 1.88  | 20.9%  |
| Pklr     | 0.1844036   | 0.08  | 45.2%  |
| Pkm2     | 147.6614    | 12.66 | 8.6%   |
| Pkmyt1   | 1.1656262   | 0.28  | 23.7%  |
| Pkn1     | 6.256092    | 0.15  | 2.3%   |
| Pkn2     | 3.547732    | 0.38  | 10.7%  |
| Pkn3     | 0.7708418   | 0.43  | 55.8%  |
| Pknox1   | 4.786164    | 0.32  | 6.8%   |
| Pknox2   | 8.900756    | 0.19  | 2.2%   |
| Pkp1     | 0.00223516  | 0.00  | 223.6% |
| Pkp2     | 0.8774964   | 0.09  | 10.6%  |
| Pkp3     | 0.009826774 | 0.01  | 107.3% |
| Pkp4     | 36.39644    | 1.45  | 4.0%   |
| Pla1a    | 0.014788    | 0.02  | 108.0% |
| Pla2g10  | 0.03769228  | 0.04  | 116.1% |
| Pla2g12a | 6.520936    | 0.35  | 5.3%   |
| Pla2g12b | 0.07444824  | 0.04  | 51.8%  |
| Pla2g1b  | 0           | 0.00  |        |
| Pla2g2a  | 0           | 0.00  |        |
| Pla2g2c  | 0           | 0.00  |        |
| Pla2g2d  | 0.06137398  | 0.03  | 46.0%  |
| Pla2g2e  | 0           | 0.00  |        |

|             |            |      |        |
|-------------|------------|------|--------|
| Pla2g2f     | 0.01092122 | 0.01 | 111.8% |
| Pla2g3      | 0.2192504  | 0.05 | 21.7%  |
| Pla2g4a     | 0.7526234  | 0.10 | 13.0%  |
| Pla2g4b     | 0.6261126  | 0.06 | 10.0%  |
| Pla2g4c     | 0.1570656  | 0.05 | 31.4%  |
| Pla2g4d     | 0          | 0.00 |        |
| Pla2g4e     | 1.156201   | 0.13 | 11.2%  |
| Pla2g4f     | 0.00697536 | 0.01 | 150.0% |
| Pla2g5      | 0.1086109  | 0.05 | 43.0%  |
| Pla2g6      | 10.76868   | 0.42 | 3.9%   |
| Pla2g7      | 46.39768   | 2.16 | 4.7%   |
| Pla2r1      | 0.00852498 | 0.01 | 155.7% |
| Plaa        | 17.60498   | 1.23 | 7.0%   |
| Plac1       | 0.06550274 | 0.02 | 22.9%  |
| Plac1l      | 0          | 0.00 |        |
| Plac8       | 1.754794   | 0.58 | 32.8%  |
| Plac8l1     | 0.03811252 | 0.05 | 143.2% |
| Plac9       | 0          | 0.00 |        |
| Plag1       | 0.3592586  | 0.06 | 18.0%  |
| Plagl1      | 20.93396   | 3.46 | 16.5%  |
| Plagl2      | 1.491138   | 0.16 | 10.5%  |
| Plat        | 7.795932   | 0.63 | 8.1%   |
| Plau        | 0.886553   | 0.21 | 23.3%  |
| Plaur       | 0.15957888 | 0.12 | 73.0%  |
| Plb1        | 0.00578444 | 0.01 | 145.2% |
| Plcb1       | 16.29814   | 1.24 | 7.6%   |
| Plcb2       | 0.03741896 | 0.03 | 74.0%  |
| Plcb3       | 2.382964   | 0.19 | 7.9%   |
| Plcb4       | 22.0743    | 1.74 | 7.9%   |
| Plcd        | 2.8280948  | 2.00 | 70.9%  |
| Plcd1       | 1.282674   | 0.06 | 5.0%   |
| Plcd3       | 3.817084   | 0.19 | 4.9%   |
| Plcd4       | 2.39344    | 0.36 | 15.2%  |
| Plce1       | 2.02144    | 0.11 | 5.6%   |
| PLC-epsilon | 0.572161   | 0.13 | 22.0%  |
| Plcg1       | 15.65756   | 0.66 | 4.2%   |
| Plcg2       | 0.14658608 | 0.05 | 33.3%  |
| Plch1       | 3.275514   | 0.39 | 11.8%  |
| Plch2       | 0.565623   | 0.04 | 7.2%   |
| Plcl1       | 8.342766   | 0.52 | 6.2%   |
| Plcl2       | 9.019482   | 0.47 | 5.2%   |
| Plcl4       | 0.110528   | 0.06 | 53.9%  |
| Plcxd1      | 2.920586   | 0.14 | 4.7%   |
| Plcxd3      | 13.65154   | 1.45 | 10.6%  |
| Plcz1       | 0.08331902 | 0.02 | 25.0%  |
| Pld1        | 1.198508   | 0.15 | 12.7%  |
| Pld2        | 2.424514   | 0.33 | 13.5%  |

|          |            |      |        |
|----------|------------|------|--------|
| Pld3     | 118.7116   | 3.29 | 2.8%   |
| Pld4     | 0.00614864 | 0.01 | 138.1% |
| Pld5     | 5.172322   | 0.50 | 9.7%   |
| Pldn     | 13.80722   | 1.27 | 9.2%   |
| Plec1    | 8.952552   | 0.91 | 10.1%  |
| Plek     | 2.543832   | 0.99 | 38.8%  |
| Plek2    | 0.1709254  | 0.05 | 26.9%  |
| Plekha1  | 15.1978    | 0.37 | 2.4%   |
| Plekha2  | 0.8337424  | 0.17 | 20.5%  |
| Plekha3  | 9.270452   | 0.49 | 5.3%   |
| Plekha4  | 0.4106806  | 0.06 | 13.7%  |
| Plekha5  | 6.706872   | 0.65 | 9.6%   |
| Plekha6  | 27.25728   | 1.31 | 4.8%   |
| Plekha7  | 0.8537162  | 0.11 | 13.0%  |
| Plekha8  | 2.439766   | 0.45 | 18.6%  |
| Plekha9  | 3.901528   | 0.39 | 10.0%  |
| Plekha10 | 108.7888   | 3.05 | 2.8%   |
| Plekha11 | 9.072384   | 0.46 | 5.0%   |
| Plekha12 | 0.8128982  | 0.17 | 20.8%  |
| Plekha13 | 1.223758   | 0.06 | 4.9%   |
| Plekha14 | 1.7615     | 0.31 | 17.8%  |
| Plekha15 | 1.128535   | 0.13 | 11.7%  |
| Plekha16 | 0.4881824  | 0.15 | 30.3%  |
| Plekha17 | 0.6966322  | 0.39 | 56.2%  |
| Plekha18 | 1.45799    | 0.40 | 27.4%  |
| Plekha19 | 0.0335884  | 0.03 | 89.7%  |
| Plekha20 | 0.6524706  | 0.06 | 9.7%   |
| Plekha21 | 0.6960064  | 0.12 | 16.9%  |
| Plekha22 | 5.633038   | 0.58 | 10.4%  |
| Plekha23 | 15.65792   | 1.09 | 7.0%   |
| Plekha24 | 0.487047   | 0.06 | 13.3%  |
| Plekha25 | 4.82109    | 0.25 | 5.1%   |
| Plekha26 | 7.255788   | 0.65 | 8.9%   |
| Plekha27 | 3.369798   | 1.09 | 32.3%  |
| Plekha28 | 3.242868   | 0.32 | 9.9%   |
| Plekha29 | 0.7791952  | 0.14 | 17.4%  |
| Plekha30 | 0.01755792 | 0.01 | 81.3%  |
| Plekha31 | 0.01572896 | 0.01 | 70.9%  |
| Plekha32 | 2.212772   | 0.43 | 19.3%  |
| Plekha33 | 19.86538   | 0.64 | 3.2%   |
| Plekha34 | 6.064672   | 0.57 | 9.4%   |
| Plekha35 | 1.621992   | 0.19 | 11.7%  |
| Plekha36 | 0.6854446  | 0.13 | 18.5%  |
| Plekha37 | 0.0080211  | 0.01 | 137.0% |
| Plekha38 | 5.752432   | 1.39 | 24.1%  |
| Plekha39 | 5.505048   | 0.81 | 14.7%  |
| Plekha40 | 8.09824    | 0.62 | 7.6%   |

|          |             |      |        |
|----------|-------------|------|--------|
| Plp1     | 3.176942    | 1.42 | 44.8%  |
| Plp2     | 0.09419034  | 0.06 | 63.2%  |
| Plrg1    | 19.1455     | 0.64 | 3.4%   |
| PLRG1    | 0.5080536   | 0.15 | 30.2%  |
| Pls3     | 27.3175     | 1.90 | 7.0%   |
| Plscr1   | 0.5452278   | 0.11 | 20.6%  |
| Plscr2   | 0.2940154   | 0.05 | 16.2%  |
| Plscr3   | 4.283668    | 0.71 | 16.6%  |
| Plscr4   | 0.252456    | 0.06 | 23.8%  |
| Pltp     | 3.673904    | 0.70 | 19.0%  |
| Plunc    | 0           | 0.00 |        |
| Plvap    | 9.158682    | 0.47 | 5.1%   |
| Plxdc1   | 1.83503     | 0.22 | 11.9%  |
| Plxdc2   | 9.518544    | 1.17 | 12.3%  |
| Plxna1   | 17.458      | 0.61 | 3.5%   |
| Plxna2   | 17.10986    | 1.37 | 8.0%   |
| Plxna3   | 8.214974    | 0.37 | 4.5%   |
| Plxna4   | 7.722726    | 0.81 | 10.5%  |
| Plxnb1   | 2.279218    | 0.08 | 3.3%   |
| Plxnb2   | 11.32944    | 0.34 | 3.0%   |
| Plxnb3   | 0.08745046  | 0.05 | 53.3%  |
| Plxnc1   | 5.86101     | 0.49 | 8.4%   |
| Plxnd1   | 0.3505958   | 0.05 | 13.1%  |
| Pmaip1   | 1.840864    | 0.36 | 19.4%  |
| PMCA2    | 34.13224    | 2.46 | 7.2%   |
| Pmch     | 0.16639938  | 0.05 | 30.3%  |
| Pmf1     | 5.04001     | 0.49 | 9.7%   |
| Pmfbp1   | 0.013381734 | 0.01 | 89.6%  |
| Pml      | 1.128096    | 0.06 | 5.6%   |
| Pmm1     | 56.32428    | 3.92 | 7.0%   |
| Pmm2     | 3.305444    | 0.55 | 16.5%  |
| Pmp2     | 0           | 0.00 |        |
| Pmp22    | 5.918714    | 1.24 | 21.0%  |
| Pmpca    | 32.37538    | 2.10 | 6.5%   |
| Pmpcb    | 18.75246    | 0.62 | 3.3%   |
| pmr1     | 0.8702678   | 0.58 | 66.7%  |
| Pms1     | 1.1169072   | 0.12 | 10.4%  |
| Pms2     | 3.313486    | 0.20 | 6.0%   |
| PMUR10F  | 0.0039867   | 0.01 | 223.6% |
| Pmvk     | 26.16686    | 2.74 | 10.5%  |
| Pnck     | 36.1345     | 4.52 | 12.5%  |
| Pnkd     | 88.41104    | 7.34 | 8.3%   |
| Pnkp     | 3.749806    | 0.20 | 5.3%   |
| Pnlip    | 0.013742    | 0.01 | 96.8%  |
| Pnliprp1 | 0.0616988   | 0.04 | 66.1%  |
| Pnliprp2 | 0.03006932  | 0.02 | 74.0%  |
| Pnma1    | 0.4121336   | 0.13 | 32.2%  |

|           |             |      |        |
|-----------|-------------|------|--------|
| Pnma2     | 17.33732    | 1.21 | 7.0%   |
| Pnma3     | 0.700659    | 0.06 | 9.0%   |
| Pnma5     | 0.04535924  | 0.03 | 65.7%  |
| Pnmt      | 0           | 0.00 |        |
| Pnn       | 20.5464     | 1.04 | 5.1%   |
| Pno1      | 11.26594    | 1.25 | 11.1%  |
| Pnoc      | 1.644292    | 0.24 | 14.9%  |
| Pnp       | 0.5391488   | 0.68 | 125.3% |
| Pnpla1    | 0.001607282 | 0.00 | 223.6% |
| Pnpla2    | 3.992486    | 0.35 | 8.9%   |
| Pnpla3    | 4.976248    | 0.42 | 8.4%   |
| Pnpla5    | 0           | 0.00 |        |
| Pnpla6    | 19.46618    | 0.40 | 2.0%   |
| Pnpla7    | 0.8131188   | 0.04 | 5.2%   |
| Pnpla8    | 29.38964    | 1.26 | 4.3%   |
| Pnpo      | 15.7004     | 0.53 | 3.4%   |
| Pnpt1     | 9.368272    | 0.54 | 5.8%   |
| Pnr       | 0           | 0.00 |        |
| Pnrc1     | 8.654556    | 1.30 | 15.0%  |
| Pnrc2     | 13.94796    | 0.64 | 4.6%   |
| Podn      | 1.1646446   | 0.25 | 21.6%  |
| Podn1     | 0.04609088  | 0.02 | 47.9%  |
| Podxl     | 4.039074    | 0.91 | 22.5%  |
| Podxl2    | 90.70426    | 2.47 | 2.7%   |
| Pof1b     | 0.1580242   | 0.04 | 25.5%  |
| Pofut1    | 3.373156    | 0.18 | 5.4%   |
| Pofut2    | 9.824612    | 0.69 | 7.1%   |
| Pog       | 0.1571761   | 0.11 | 72.6%  |
| Pogk      | 4.99075     | 0.56 | 11.2%  |
| Pogz      | 9.338864    | 0.43 | 4.6%   |
| Pol       | 0           | 0.00 |        |
| Pol_gamma | 0.2687522   | 0.17 | 63.9%  |
| Pola1     | 0.9205764   | 0.20 | 21.5%  |
| POLA1     | 0.32150764  | 0.47 | 146.7% |
| Pola2     | 3.314218    | 0.15 | 4.6%   |
| Polb      | 21.09392    | 1.32 | 6.2%   |
| Pold1     | 0.992173    | 0.15 | 15.0%  |
| Pold2     | 12.10434    | 0.93 | 7.7%   |
| Pold3     | 3.81763     | 0.19 | 5.0%   |
| Pold4     | 11.33236    | 0.28 | 2.5%   |
| Poldip2   | 26.5817     | 0.61 | 2.3%   |
| Poldip3   | 35.75128    | 1.59 | 4.4%   |
| Pole      | 0.6705268   | 0.16 | 23.4%  |
| Pole1     | 0.1834135   | 0.11 | 61.0%  |
| Pole2     | 0.463963    | 0.10 | 22.4%  |
| Pole3     | 6.24265     | 0.41 | 6.5%   |
| Pole4     | 19.3447     | 1.73 | 8.9%   |

|         |            |      |        |
|---------|------------|------|--------|
| Polg    | 5.88474    | 0.56 | 9.5%   |
| Polg2   | 0.9734458  | 0.52 | 53.6%  |
| Polh    | 1.166276   | 0.13 | 10.8%  |
| Poli    | 2.302082   | 0.15 | 6.7%   |
| Poll    | 0.1589784  | 0.09 | 55.3%  |
| Polk    | 2.384456   | 0.34 | 14.3%  |
| Poll    | 2.921762   | 0.36 | 12.5%  |
| Polm    | 1.25641    | 0.07 | 5.3%   |
| Poln    | 0.370504   | 0.25 | 68.5%  |
| Polq    | 0.2991684  | 0.04 | 12.3%  |
| Polr1e  | 2.455642   | 0.26 | 10.5%  |
| Polr2a  | 20.83264   | 0.94 | 4.5%   |
| Polr2b  | 21.8555    | 0.65 | 3.0%   |
| Polr2c  | 5.388874   | 0.16 | 3.0%   |
| Polr2d  | 14.42608   | 1.43 | 9.9%   |
| Polr2e  | 15.7884    | 1.20 | 7.6%   |
| Polr2f  | 30.2751    | 2.86 | 9.4%   |
| Polr2g  | 49.65874   | 1.27 | 2.6%   |
| Polr2h  | 5.206554   | 0.47 | 9.1%   |
| Polr2i  | 7.467654   | 0.42 | 5.6%   |
| Polr2j  | 25.86388   | 2.31 | 8.9%   |
| Polr2k  | 1.3691888  | 0.34 | 24.6%  |
| Polr3a  | 5.637686   | 0.30 | 5.3%   |
| Polr3b  | 4.912394   | 0.41 | 8.4%   |
| Polr3c  | 9.225278   | 1.00 | 10.8%  |
| Polr3d  | 7.737222   | 0.52 | 6.7%   |
| Polr3e  | 6.832498   | 0.26 | 3.9%   |
| Polr3f  | 5.384634   | 0.28 | 5.2%   |
| Polr3g  | 1.799102   | 0.22 | 12.1%  |
| Polr3gl | 4.227884   | 0.31 | 7.3%   |
| Polr3h  | 7.908286   | 0.85 | 10.8%  |
| Polr3k  | 26.21596   | 1.55 | 5.9%   |
| Polrmt  | 5.873812   | 0.40 | 6.8%   |
| Pols    | 10.6121    | 0.59 | 5.5%   |
| Pom121  | 14.28398   | 0.59 | 4.1%   |
| Pomc1   | 0.510455   | 0.08 | 16.3%  |
| Pomgnt1 | 13.8697    | 1.06 | 7.7%   |
| Pomp    | 52.46446   | 2.75 | 5.2%   |
| Pomt1   | 4.941354   | 0.27 | 5.4%   |
| Pomt2   | 6.544412   | 0.29 | 4.5%   |
| Pon1    | 0.0096217  | 0.01 | 137.6% |
| Pon2    | 5.921456   | 0.35 | 5.9%   |
| Pon3    | 0.06003272 | 0.04 | 66.3%  |
| Pop1    | 2.198056   | 0.22 | 10.2%  |
| Pop4    | 12.5563    | 1.17 | 9.4%   |
| Pop5    | 9.020156   | 0.52 | 5.8%   |
| Pop7    | 10.183606  | 1.21 | 11.9%  |

|                  |            |      |        |
|------------------|------------|------|--------|
| Popdc2           | 0.2703074  | 0.09 | 31.9%  |
| Popdc3           | 1.286982   | 0.45 | 35.0%  |
| Por              | 20.35882   | 2.02 | 9.9%   |
| Porcn            | 14.61238   | 0.46 | 3.2%   |
| Postn            | 29.36468   | 5.24 | 17.8%  |
| Pot1a            | 4.340118   | 0.22 | 5.2%   |
| Pot1b            | 0.4351668  | 0.06 | 14.5%  |
| Pou1f1           | 0.00610424 | 0.01 | 223.6% |
| Pou2af1          | 0.01109712 | 0.01 | 99.8%  |
| Pou2f1           | 1.589834   | 0.25 | 15.9%  |
| Pou2f2           | 0.2650916  | 0.06 | 22.5%  |
| Pou2f3           | 0.00528218 | 0.01 | 138.0% |
| Pou3f1           | 5.276528   | 0.85 | 16.1%  |
| Pou3f2           | 6.410126   | 0.57 | 9.0%   |
| Pou3f3           | 8.4521     | 0.37 | 4.4%   |
| Pou3f4           | 0.969407   | 0.13 | 13.2%  |
| Pou4f1           | 8.906972   | 0.49 | 5.5%   |
| Pou4f2           | 6.563588   | 0.65 | 9.9%   |
| Pou4f3           | 1.384986   | 0.30 | 21.7%  |
| Pou5f1           | 0          | 0.00 |        |
| Pou6f1           | 14.03386   | 0.70 | 5.0%   |
| Pou6f2           | 0.2991644  | 0.09 | 30.8%  |
| Pp11r            | 0.00506506 | 0.01 | 223.6% |
| PP2A_B56_gamma_3 | 0.4624038  | 0.21 | 46.1%  |
| Ppa1             | 32.27268   | 2.54 | 7.9%   |
| Ppa2             | 11.7069    | 0.48 | 4.1%   |
| Ppan             | 5.364278   | 0.84 | 15.6%  |
| Ppap2a           | 22.74458   | 1.72 | 7.6%   |
| Ppap2b           | 12.61138   | 1.32 | 10.5%  |
| Ppap2c           | 2.026504   | 0.34 | 16.7%  |
| Ppapdc1          | 7.92692    | 0.63 | 8.0%   |
| Ppapdc1a         | 8.470898   | 0.50 | 5.9%   |
| Ppapdc2          | 14.16222   | 1.02 | 7.2%   |
| Ppapdc3          | 5.06617    | 0.10 | 1.9%   |
| Ppara            | 0.2123884  | 0.06 | 28.5%  |
| Ppard            | 2.597682   | 0.38 | 14.8%  |
| Pparg            | 0.2167136  | 0.09 | 42.3%  |
| Ppargc1a         | 8.42618    | 0.59 | 7.0%   |
| Ppargc1b         | 2.403914   | 0.24 | 10.1%  |
| Ppat             | 4.140678   | 0.21 | 5.1%   |
| Ppbp             | 0          | 0.00 |        |
| Ppcdc            | 2.278554   | 0.16 | 7.1%   |
| Ppcs             | 5.533732   | 0.29 | 5.2%   |
| Ppef1            | 0.1140213  | 0.07 | 57.9%  |
| Ppef2            | 0.05723042 | 0.02 | 34.6%  |
| Ppfia1           | 1.852786   | 0.50 | 27.1%  |
| Ppfia2           | 17.68584   | 1.66 | 9.4%   |



|          |            |      |        |
|----------|------------|------|--------|
| Ppfia3   | 39.69096   | 2.87 | 7.2%   |
| Ppfia4   | 23.41112   | 1.05 | 4.5%   |
| Ppfibp1  | 1.896628   | 0.15 | 7.9%   |
| Ppfibp2  | 1.0141356  | 0.07 | 6.5%   |
| Pphln1   | 13.31638   | 0.78 | 5.9%   |
| Ppia     | 0.596213   | 0.06 | 10.1%  |
| Ppib     | 71.6973    | 3.39 | 4.7%   |
| Ppic     | 12.72524   | 1.30 | 10.2%  |
| Ppid     | 15.86304   | 0.39 | 2.5%   |
| Ppie     | 3.929756   | 0.14 | 3.5%   |
| Ppif     | 20.64814   | 0.98 | 4.8%   |
| Ppig     | 17.07694   | 0.69 | 4.0%   |
| Ppih     | 0.8361436  | 0.17 | 20.3%  |
| Ppil1    | 8.085996   | 1.38 | 17.1%  |
| Ppil2    | 7.700854   | 0.39 | 5.0%   |
| Ppil3    | 9.860008   | 2.70 | 27.4%  |
| Ppil4    | 9.929778   | 0.43 | 4.3%   |
| Ppil5    | 0.157265   | 0.05 | 30.3%  |
| Ppl      | 0.00840724 | 0.01 | 75.2%  |
| Ppm1a    | 71.76694   | 2.21 | 3.1%   |
| Ppm1b    | 18.0627    | 0.27 | 1.5%   |
| Ppm1d    | 3.33599    | 0.20 | 6.1%   |
| Ppm1e    | 32.23034   | 1.80 | 5.6%   |
| Ppm1f    | 13.52158   | 1.33 | 9.8%   |
| Ppm1g    | 30.55036   | 3.19 | 10.4%  |
| Ppm1h    | 13.80704   | 0.65 | 4.7%   |
| Ppm1j    | 0.1804288  | 0.06 | 33.3%  |
| Ppm1k    | 8.107872   | 1.07 | 13.2%  |
| Ppm1l    | 10.332974  | 0.79 | 7.6%   |
| Ppm1m    | 1.565932   | 0.17 | 10.9%  |
| Ppm2c    | 19.24464   | 0.53 | 2.7%   |
| Ppme1    | 47.82058   | 1.29 | 2.7%   |
| Ppnr     | 0.00353212 | 0.01 | 223.6% |
| Ppnx     | 0.06930262 | 0.03 | 42.0%  |
| Ppox     | 2.552202   | 0.25 | 9.8%   |
| Ppp1ca   | 109.6516   | 7.53 | 6.9%   |
| Ppp1cb   | 128.7348   | 5.30 | 4.1%   |
| Ppp1cc   | 2.070596   | 0.18 | 8.7%   |
| Ppp1r10  | 10.883322  | 0.83 | 7.6%   |
| Ppp1r11  | 36.82076   | 1.96 | 5.3%   |
| Ppp1r12a | 9.920746   | 0.52 | 5.2%   |
| Ppp1r12b | 6.483294   | 0.18 | 2.7%   |
| Ppp1r12c | 13.835     | 1.08 | 7.8%   |
| Ppp1r13b | 17.35754   | 0.95 | 5.5%   |
| Ppp1r13l | 0.4853488  | 0.10 | 21.4%  |
| Ppp1r14a | 0.05874178 | 0.07 | 112.9% |
| Ppp1r14b | 4.387724   | 0.45 | 10.3%  |

|          |            |       |       |
|----------|------------|-------|-------|
| Ppp1r14c | 5.444546   | 0.90  | 16.6% |
| Ppp1r14d | 0          | 0.00  |       |
| Ppp1r15b | 11.96022   | 0.65  | 5.4%  |
| Ppp1r16a | 12.74932   | 1.08  | 8.5%  |
| Ppp1r16b | 6.248796   | 0.20  | 3.1%  |
| Ppp1r1a  | 12.2139    | 1.53  | 12.5% |
| Ppp1r1b  | 0.2501518  | 0.12  | 47.4% |
| Ppp1r1c  | 0.217673   | 0.05  | 20.7% |
| Ppp1r2   | 3.383228   | 0.35  | 10.5% |
| Ppp1r3a  | 0          | 0.00  |       |
| Ppp1r3b  | 0.4739116  | 0.17  | 36.7% |
| Ppp1r3c  | 4.406722   | 0.87  | 19.7% |
| Ppp1r3d  | 2.601294   | 0.26  | 9.8%  |
| Ppp1r3f  | 9.84616    | 0.49  | 5.0%  |
| Ppp1r7   | 17.56204   | 1.08  | 6.2%  |
| Ppp1r8   | 15.27788   | 1.07  | 7.0%  |
| Ppp1r9a  | 14.8946    | 1.23  | 8.2%  |
| Ppp1r9b  | 56.1895    | 1.83  | 3.3%  |
| Ppp2ca   | 179.3636   | 8.99  | 5.0%  |
| Ppp2cb   | 46.3168    | 2.12  | 4.6%  |
| Ppp2r1a  | 236.4966   | 12.65 | 5.3%  |
| Ppp2r1b  | 13.28614   | 0.83  | 6.3%  |
| Ppp2r2a  | 17.55234   | 1.16  | 6.6%  |
| Ppp2r2b  | 63.17294   | 4.06  | 6.4%  |
| Ppp2r2c  | 79.9021    | 1.26  | 1.6%  |
| Ppp2r2d  | 29.12832   | 2.35  | 8.1%  |
| Ppp2r3a  | 0          | 0.00  |       |
| Ppp2r3c  | 8.255334   | 0.73  | 8.8%  |
| Ppp2r4   | 46.1943    | 1.46  | 3.2%  |
| Ppp2r5a  | 1.706552   | 0.17  | 10.1% |
| Ppp2r5b  | 69.29342   | 5.71  | 8.2%  |
| Ppp2r5c  | 47.81706   | 2.30  | 4.8%  |
| Ppp2r5d  | 35.08514   | 1.22  | 3.5%  |
| Ppp2r5e  | 27.64208   | 1.05  | 3.8%  |
| Ppp3ca   | 126.7874   | 5.88  | 4.6%  |
| Ppp3cb   | 93.00618   | 2.60  | 2.8%  |
| Ppp3cc   | 6.802722   | 0.84  | 12.3% |
| Ppp3r1   | 206.519    | 5.60  | 2.7%  |
| Ppp3r2   | 0.04349908 | 0.03  | 61.2% |
| Ppp4c    | 14.35806   | 0.87  | 6.0%  |
| Ppp4r1   | 7.198398   | 0.46  | 6.4%  |
| Ppp4r1l  | 3.792186   | 0.26  | 6.8%  |
| Ppp4r2   | 7.031674   | 0.23  | 3.3%  |
| Ppp5c    | 39.86064   | 1.76  | 4.4%  |
| Ppp6c    | 20.09794   | 1.18  | 5.9%  |
| Pprc1    | 5.78714    | 0.55  | 9.5%  |
| Pps      | 8.273974   | 0.23  | 2.7%  |

|           |            |      |        |
|-----------|------------|------|--------|
| Ppt1      | 42.46052   | 1.74 | 4.1%   |
| Ppt2      | 8.497616   | 0.22 | 2.6%   |
| Pptc7     | 12.91558   | 0.73 | 5.7%   |
| Ppwd1     | 3.340398   | 0.29 | 8.6%   |
| Ppy       | 0.01274926 | 0.03 | 223.6% |
| Ppyr1     | 0.00783876 | 0.01 | 140.6% |
| Pqbp1     | 29.05828   | 1.43 | 4.9%   |
| Pqlc1     | 6.854086   | 0.25 | 3.7%   |
| Pqlc2     | 5.121404   | 0.38 | 7.5%   |
| Pqlc3     | 0.8940686  | 0.17 | 19.4%  |
| Pra1      | 6.729722   | 2.00 | 29.8%  |
| Praf2     | 38.60972   | 2.04 | 5.3%   |
| Pram1     | 3.4642936  | 2.54 | 73.2%  |
| Pramef12  | 0          | 0.00 |        |
| Pramel1   | 0.01120754 | 0.01 | 99.9%  |
| Pramel3   | 0          | 0.00 |        |
| Pramel4   | 0          | 0.00 |        |
| Pramel5   | 0          | 0.00 |        |
| Pramel6   | 0          | 0.00 |        |
| Pramel7   | 0          | 0.00 |        |
| Prap1     | 0          | 0.00 |        |
| Prb1      | 0          | 0.00 |        |
| Prc1      | 1.568736   | 0.24 | 15.6%  |
| Prc       | 16.65428   | 0.71 | 4.3%   |
| Prcd      | 1.1491918  | 0.39 | 34.3%  |
| Prcp      | 3.54409    | 0.27 | 7.6%   |
| Prdm1     | 0.245205   | 0.06 | 24.7%  |
| Prdm10    | 2.941442   | 0.23 | 7.9%   |
| Prdm13    | 0.08817428 | 0.03 | 33.1%  |
| Prdm14    | 0.00707596 | 0.01 | 145.6% |
| Prdm15    | 1.960884   | 0.14 | 7.3%   |
| Prdm16    | 0.2260114  | 0.02 | 10.9%  |
| Prdm2     | 4.683474   | 0.14 | 3.0%   |
| Prdm4     | 7.337914   | 0.28 | 3.8%   |
| Prdm5     | 0.5003604  | 0.13 | 26.5%  |
| Prdm6     | 0.3635802  | 0.10 | 28.2%  |
| Prdm8     | 0.719963   | 0.13 | 18.1%  |
| Prdm9     | 0.4318626  | 0.12 | 28.3%  |
| Prdx1     | 57.97868   | 3.19 | 5.5%   |
| Prdx2     | 97.86426   | 8.31 | 8.5%   |
| Prdx3     | 63.7003    | 4.06 | 6.4%   |
| Prdx4     | 12.63036   | 1.25 | 9.9%   |
| Prdx5     | 170.8746   | 8.82 | 5.2%   |
| Prdx6     | 28.84872   | 2.06 | 7.1%   |
| Prdx6-rs1 | 1.433614   | 0.08 | 5.5%   |
| Preb      | 22.72678   | 0.24 | 1.0%   |
| Prei4     | 14.3537    | 2.24 | 15.6%  |

|          |            |       |       |
|----------|------------|-------|-------|
| Prelid1  | 30.69076   | 2.00  | 6.5%  |
| Prelid2  | 0.2386906  | 0.14  | 60.3% |
| Prelp    | 2.29037    | 0.70  | 30.4% |
| Prep     | 21.74736   | 2.16  | 9.9%  |
| PREP2    | 0.06712188 | 0.01  | 17.5% |
| Prepl    | 192.9118   | 6.48  | 3.4%  |
| P-Rex2   | 0.10758028 | 0.03  | 27.8% |
| Prf1     | 0          | 0.00  |       |
| Prg2     | 0          | 0.00  |       |
| Prg3     | 0          | 0.00  |       |
| Prg4     | 1.24791236 | 0.85  | 68.1% |
| Prh1     | 0          | 0.00  |       |
| Prhoxnb  | 0          | 0.00  |       |
| Prickle1 | 13.019     | 0.28  | 2.2%  |
| Prickle2 | 6.989738   | 0.75  | 10.7% |
| Prim1    | 2.997024   | 0.18  | 5.8%  |
| Prim2    | 2.000092   | 0.30  | 15.0% |
| Prima1   | 6.46263    | 0.74  | 11.4% |
| Prip     | 0.09087138 | 0.04  | 46.3% |
| Prkaa1   | 10.729478  | 1.02  | 9.5%  |
| Prkaa2   | 5.747532   | 0.54  | 9.5%  |
| Prkab1   | 5.235312   | 0.27  | 5.2%  |
| Prkab2   | 13.09808   | 0.63  | 4.8%  |
| Prkaca   | 123.056    | 5.19  | 4.2%  |
| Prkacb   | 185.978    | 11.44 | 6.2%  |
| Prkag1   | 14.72152   | 0.90  | 6.1%  |
| Prkag2   | 13.73284   | 0.65  | 4.7%  |
| Prkag3   | 0          | 0.00  |       |
| Prkar1a  | 236.3182   | 2.17  | 0.9%  |
| Prkar1b  | 197.2958   | 3.30  | 1.7%  |
| Prkar2a  | 24.47482   | 2.11  | 8.6%  |
| Prkar2b  | 35.57186   | 2.77  | 7.8%  |
| Prkca    | 8.821484   | 0.29  | 3.3%  |
| Prkcb1   | 63.1353    | 1.66  | 2.6%  |
| Prkcbp1  | 9.078206   | 0.29  | 3.2%  |
| Prkcc    | 3.36662    | 0.47  | 13.9% |
| Prkcd    | 1.88073    | 0.16  | 8.7%  |
| Prkcdbp  | 0.5054862  | 0.05  | 9.0%  |
| Prkce    | 24.99738   | 1.54  | 6.1%  |
| Prkch    | 1.292504   | 0.11  | 8.3%  |
| Prkci    | 17.48144   | 0.52  | 2.9%  |
| Prkcm    | 1.2114344  | 0.21  | 17.3% |
| Prkcn    | 1.702666   | 0.20  | 12.0% |
| Prkcq    | 0.8239376  | 0.11  | 13.8% |
| Prkcsh   | 41.46156   | 1.94  | 4.7%  |
| Prkcz    | 11.35856   | 0.12  | 1.1%  |
| Prkd2    | 0.8927478  | 0.12  | 13.9% |

|         |            |      |        |
|---------|------------|------|--------|
| Prkdc   | 1.0521954  | 0.06 | 5.5%   |
| Prkg1   | 1.840492   | 0.14 | 7.7%   |
| Prkg1b  | 0.03524158 | 0.01 | 20.2%  |
| Prkg2   | 0.5149804  | 0.05 | 9.9%   |
| Prkra   | 13.5369    | 0.61 | 4.5%   |
| Prkrip1 | 4.874498   | 0.15 | 3.1%   |
| Prkrir  | 14.44896   | 0.86 | 6.0%   |
| PRKWNK4 | 0.08479812 | 0.04 | 43.8%  |
| Prkx    | 4.94095    | 0.21 | 4.2%   |
| Prl     | 0          | 0.00 |        |
| Prl2a1  | 0          | 0.00 |        |
| Prl2b1  | 0          | 0.00 |        |
| Prl2c2  | 0          | 0.00 |        |
| Prl2c3  | 0          | 0.00 |        |
| Prl2c5  | 0          | 0.00 |        |
| Prl3a1  | 0          | 0.00 |        |
| Prl3b1  | 0          | 0.00 |        |
| Prl3c1  | 0          | 0.00 |        |
| Prl3d1  | 0          | 0.00 |        |
| Prl3d2  | 0          | 0.00 |        |
| Prl3d3  | 0          | 0.00 |        |
| Prl4a1  | 0.0082849  | 0.02 | 223.6% |
| Prl5a1  | 0          | 0.00 |        |
| Prl6a1  | 0          | 0.00 |        |
| Prl7a1  | 0          | 0.00 |        |
| Prl7a2  | 0          | 0.00 |        |
| Prl7b1  | 0          | 0.00 |        |
| Prl7c1  | 0          | 0.00 |        |
| Prl7d1  | 0          | 0.00 |        |
| Prl8a1  | 0          | 0.00 |        |
| Prl8a2  | 0          | 0.00 |        |
| Prl8a6  | 0          | 0.00 |        |
| Prl8a8  | 0          | 0.00 |        |
| Prl8a9  | 0          | 0.00 |        |
| Prlhr   | 0.05499884 | 0.05 | 86.3%  |
| Prlpc1  | 0          | 0.00 |        |
| Prlpc3  | 0          | 0.00 |        |
| Prlr    | 1.569276   | 0.23 | 14.7%  |
| Prm1    | 0.13022    | 0.05 | 34.7%  |
| Prm2    | 0.01144102 | 0.03 | 223.6% |
| Prm3    | 0          | 0.00 |        |
| Prmt1   | 49.94108   | 5.31 | 10.6%  |
| Prmt2   | 38.17156   | 4.59 | 12.0%  |
| Prmt3   | 12.28566   | 0.57 | 4.6%   |
| Prmt5   | 24.708     | 1.80 | 7.3%   |
| Prmt6   | 7.101044   | 0.45 | 6.4%   |
| Prmt7   | 17.36806   | 1.52 | 8.7%   |

|           |             |      |        |
|-----------|-------------|------|--------|
| Prmt8     | 10.791648   | 1.88 | 17.4%  |
| Prnd      | 0.03062812  | 0.01 | 43.0%  |
| Prnp      | 121.4808    | 8.29 | 6.8%   |
| Prnpip1   | 59.69096    | 2.77 | 4.6%   |
| Proc      | 0           | 0.00 |        |
| Procr     | 0.2939372   | 0.14 | 48.7%  |
| Prodh     | 0.6607412   | 0.04 | 6.6%   |
| Prodh2    | 0.00764494  | 0.01 | 137.0% |
| Prok1     | 0.0817727   | 0.07 | 87.7%  |
| Prok2     | 1.042911    | 0.24 | 23.0%  |
| Prokr1    | 0.1970798   | 0.07 | 33.7%  |
| Prokr2    | 3.60874     | 0.31 | 8.6%   |
| Prom1     | 0.648644    | 0.12 | 17.9%  |
| Prom2     | 0.001338982 | 0.00 | 223.6% |
| Prop1     | 0           | 0.00 |        |
| Pros1     | 4.412364    | 0.34 | 7.6%   |
| Prosapip1 | 29.68506    | 0.89 | 3.0%   |
| Prosc     | 20.012      | 1.54 | 7.7%   |
| Prox1     | 0.660531    | 0.07 | 10.7%  |
| Prox2     | 0.2190956   | 0.03 | 15.7%  |
| Proz      | 0.3760152   | 0.08 | 21.2%  |
| Prp2      | 0           | 0.00 |        |
| Prpf18    | 11.45996    | 0.29 | 2.6%   |
| Prpf19    | 93.19468    | 3.52 | 3.8%   |
| Prpf3     | 4.092352    | 0.24 | 5.8%   |
| Prpf31    | 13.81282    | 0.72 | 5.2%   |
| Prpf38a   | 8.289388    | 1.00 | 12.1%  |
| Prpf38b   | 10.773214   | 1.31 | 12.1%  |
| Prpf39    | 12.245228   | 2.13 | 17.4%  |
| Prpf4     | 3.762398    | 0.17 | 4.5%   |
| Prpf40a   | 11.84678    | 0.84 | 7.1%   |
| Prpf40b   | 15.55318    | 0.92 | 5.9%   |
| Prpf4b    | 20.55668    | 1.03 | 5.0%   |
| Prpf6     | 16.35352    | 0.13 | 0.8%   |
| Prpf8     | 34.74654    | 1.61 | 4.6%   |
| Prph      | 0.8461014   | 0.15 | 18.3%  |
| Prph2     | 0           | 0.00 |        |
| Prpmp5    | 0           | 0.00 |        |
| Prps1     | 33.22936    | 2.60 | 7.8%   |
| Prps1l1   | 0           | 0.00 |        |
| Prps2     | 7.153478    | 0.51 | 7.1%   |
| Prpsap1   | 19.80206    | 0.59 | 3.0%   |
| Prpsap2   | 4.34374     | 0.28 | 6.4%   |
| Prr11     | 0.6904064   | 0.07 | 10.7%  |
| Prr12     | 9.166406    | 0.50 | 5.5%   |
| Prr13     | 39.92828    | 2.53 | 6.3%   |
| Prr14     | 6.474512    | 0.32 | 5.0%   |

|        |            |       |        |
|--------|------------|-------|--------|
| Prr15  | 0.12721558 | 0.09  | 67.5%  |
| Prr16  | 1.706086   | 0.33  | 19.2%  |
| Prr18  | 2.62365    | 0.16  | 5.9%   |
| Prr3   | 20.81782   | 0.79  | 3.8%   |
| Prr6   | 5.098134   | 0.38  | 7.4%   |
| Prr7   | 5.484456   | 0.88  | 16.0%  |
| Prr8   | 7.518218   | 0.74  | 9.8%   |
| Prrc1  | 7.901672   | 0.69  | 8.7%   |
| Prrg1  | 1.518538   | 0.21  | 14.1%  |
| Prrg2  | 1.445068   | 0.27  | 18.9%  |
| Prrg3  | 4.970178   | 0.44  | 8.9%   |
| Prrg4  | 0.4251768  | 0.11  | 26.0%  |
| Prrt1  | 1.130454   | 0.08  | 6.7%   |
| Prrt3  | 11.07638   | 0.57  | 5.1%   |
| Prrx1  | 2.28812    | 0.44  | 19.1%  |
| Prrx2  | 0.331204   | 0.14  | 41.5%  |
| Prrxl1 | 0.0662278  | 0.05  | 75.9%  |
| Prss1  | 0.00956928 | 0.02  | 223.6% |
| Prss12 | 1.725458   | 0.30  | 17.1%  |
| Prss16 | 0.07121618 | 0.03  | 47.9%  |
| Prss2  | 0          | 0.00  |        |
| Prss21 | 0          | 0.00  |        |
| Prss22 | 0          | 0.00  |        |
| Prss23 | 1.375022   | 0.16  | 11.4%  |
| Prss27 | 0          | 0.00  |        |
| Prss28 | 0          | 0.00  |        |
| Prss29 | 0          | 0.00  |        |
| Prss3  | 0          | 0.00  |        |
| Prss32 | 0.02987638 | 0.04  | 143.5% |
| Prss33 | 0          | 0.00  |        |
| Prss34 | 0          | 0.00  |        |
| Prss35 | 1.0237674  | 0.16  | 16.0%  |
| Prss36 | 4.276292   | 0.25  | 5.8%   |
| Prss7  | 0          | 0.00  |        |
| Prss8  | 1.1099387  | 0.74  | 66.7%  |
| Prssl1 | 0.09347136 | 0.02  | 24.5%  |
| Prtg   | 0.1510174  | 0.02  | 12.9%  |
| Prtn3  | 2.438142   | 0.73  | 30.1%  |
| Prune  | 11.5694    | 1.14  | 9.8%   |
| Prx    | 0.2215806  | 0.03  | 12.4%  |
| Psap   | 463.7      | 8.80  | 1.9%   |
| Psapl1 | 0          | 0.00  |        |
| Psat1  | 48.4949    | 10.75 | 22.2%  |
| Psca   | 0.2017562  | 0.08  | 39.9%  |
| Pscd1  | 11.85828   | 0.55  | 4.7%   |
| Pscd2  | 15.48186   | 1.23  | 7.9%   |
| Pscd3  | 13.01344   | 0.48  | 3.7%   |

|          |            |      |        |
|----------|------------|------|--------|
| Pscd4    | 0.04113332 | 0.01 | 27.3%  |
| Pscdbp   | 0.09901648 | 0.06 | 61.0%  |
| Psd      | 63.17686   | 2.38 | 3.8%   |
| Psd2     | 11.6132    | 0.42 | 3.6%   |
| Psd3     | 16.31564   | 2.17 | 13.3%  |
| Psd4     | 0.05730572 | 0.03 | 52.6%  |
| Psen1    | 19.81938   | 1.22 | 6.2%   |
| Psen2    | 7.0081     | 0.50 | 7.1%   |
| Psenen   | 2.28887    | 0.32 | 14.1%  |
| Psg16    | 0.6499858  | 0.12 | 18.3%  |
| Psg17    | 0.0098765  | 0.01 | 139.5% |
| Psg18    | 0          | 0.00 |        |
| Psg19    | 0.00428004 | 0.01 | 223.6% |
| Psg21    | 0.00277072 | 0.01 | 223.6% |
| Psg23    | 0          | 0.00 |        |
| Psg25    | 0          | 0.00 |        |
| Psg28    | 0.00325778 | 0.01 | 223.6% |
| Psg29    | 0          | 0.00 |        |
| Psg30    | 0          | 0.00 |        |
| Psip1    | 54.81826   | 1.99 | 3.6%   |
| Pskh1    | 2.908654   | 0.19 | 6.4%   |
| Psma1    | 57.9238    | 3.44 | 5.9%   |
| Psma2    | 48.19134   | 2.48 | 5.1%   |
| Psma3    | 6.485062   | 0.60 | 9.2%   |
| Psma4    | 24.49122   | 1.70 | 6.9%   |
| Psma5    | 5.157928   | 0.08 | 1.6%   |
| Psma6    | 66.03794   | 2.52 | 3.8%   |
| Psma7    | 71.80478   | 5.10 | 7.1%   |
| Psma8    | 0          | 0.00 |        |
| Psemb1   | 60.43972   | 3.81 | 6.3%   |
| Psemb10  | 13.69338   | 1.66 | 12.1%  |
| Psemb2   | 50.55566   | 4.79 | 9.5%   |
| Psemb3   | 5.94637    | 0.77 | 13.0%  |
| Psemb4   | 86.16174   | 5.95 | 6.9%   |
| Psemb5   | 20.43644   | 1.37 | 6.7%   |
| Psemb6   | 52.21682   | 3.72 | 7.1%   |
| Psemb7   | 91.14264   | 3.08 | 3.4%   |
| Psemb8   | 0.3455262  | 0.11 | 31.5%  |
| Psemb9   | 0.8122606  | 0.23 | 28.0%  |
| Psembeta | 0.19022838 | 0.14 | 74.2%  |
| Psmc1    | 24.792     | 2.49 | 10.0%  |
| Psmc2    | 48.44596   | 0.64 | 1.3%   |
| Psmc3    | 38.64546   | 3.17 | 8.2%   |
| Psmc3ip  | 0.9606222  | 0.14 | 14.4%  |
| Psmc4    | 40.94468   | 2.31 | 5.6%   |
| Psmc5    | 60.02412   | 4.43 | 7.4%   |
| Psmc6    | 60.14298   | 2.02 | 3.4%   |



|          |            |      |        |
|----------|------------|------|--------|
| Psmid1   | 62.89868   | 3.49 | 5.5%   |
| Psmid10  | 6.615798   | 0.44 | 6.6%   |
| Psmid11  | 7.780198   | 0.28 | 3.6%   |
| Psmid12  | 42.50216   | 1.90 | 4.5%   |
| Psmid13  | 38.79164   | 2.13 | 5.5%   |
| Psmid14  | 34.86188   | 1.30 | 3.7%   |
| Psmid2   | 47.29542   | 1.65 | 3.5%   |
| Psmid3   | 44.0829    | 2.20 | 5.0%   |
| Psmid4   | 51.0926    | 3.75 | 7.3%   |
| Psmid5   | 25.03486   | 1.58 | 6.3%   |
| Psmid6   | 50.44928   | 3.65 | 7.2%   |
| Psmid7   | 47.5167    | 3.50 | 7.4%   |
| Psmid8   | 45.12786   | 2.58 | 5.7%   |
| Psmid9   | 7.294756   | 0.64 | 8.7%   |
| Psme1    | 24.81422   | 1.96 | 7.9%   |
| Psme2    | 1.546438   | 0.11 | 7.0%   |
| Psme3    | 32.66612   | 0.98 | 3.0%   |
| Psme4    | 16.87794   | 1.07 | 6.3%   |
| Psmf1    | 14.08212   | 0.87 | 6.2%   |
| Psmg3    | 8.365274   | 1.03 | 12.3%  |
| Psors1c2 | 0.176383   | 0.07 | 38.6%  |
| Psp      | 0.00682632 | 0.02 | 223.6% |
| Pspc1    | 19.49922   | 2.16 | 11.1%  |
| Psph     | 5.151324   | 0.37 | 7.2%   |
| Pspn     | 0.16219042 | 0.09 | 53.1%  |
| Psrc1    | 1.90461    | 0.19 | 9.9%   |
| Pstk     | 9.526182   | 0.12 | 1.3%   |
| Pstpip1  | 0.01142596 | 0.02 | 156.5% |
| Pstpip2  | 1.0882274  | 0.14 | 12.5%  |
| Ptafr    | 0          | 0.00 |        |
| Ptbp1    | 5.88957    | 0.68 | 11.6%  |
| Ptbp2    | 54.614     | 1.99 | 3.6%   |
| Ptcd1    | 5.759052   | 0.60 | 10.5%  |
| Ptcd2    | 17.13684   | 0.76 | 4.4%   |
| Ptcd3    | 18.10902   | 0.88 | 4.8%   |
| PTCH     | 12.650622  | 4.71 | 37.2%  |
| Ptch1    | 12.8297    | 2.14 | 16.7%  |
| Ptch2    | 0.482339   | 0.16 | 32.6%  |
| Ptchd1   | 10.53218   | 0.08 | 0.8%   |
| Ptchd2   | 1.372802   | 0.12 | 8.5%   |
| Ptchd3   | 0.00565534 | 0.01 | 140.7% |
| Ptcra    | 0.04108976 | 0.04 | 108.2% |
| Ptdsr    | 0.807417   | 0.15 | 18.8%  |
| Ptdss1   | 30.04972   | 1.81 | 6.0%   |
| Ptdss2   | 19.07062   | 1.64 | 8.6%   |
| Pte2     | 1.072262   | 0.06 | 5.9%   |
| Pten     | 39.81922   | 1.21 | 3.0%   |

|         |             |       |        |
|---------|-------------|-------|--------|
| Pter    | 1.09578     | 0.16  | 14.3%  |
| Ptf1a   | 0.2203234   | 0.07  | 33.0%  |
| Ptgdr   | 0.02893018  | 0.01  | 29.3%  |
| Ptgds   | 0.533098    | 0.11  | 21.4%  |
| Ptgds2  | 0.02799302  | 0.03  | 109.9% |
| Ptger1  | 3.414724    | 0.26  | 7.6%   |
| Ptger2  | 0.01247124  | 0.02  | 152.4% |
| Ptger3  | 2.626682    | 0.30  | 11.5%  |
| Ptger4  | 1.310546    | 0.15  | 11.3%  |
| Ptges   | 0.06380882  | 0.01  | 21.3%  |
| Ptges2  | 15.30284    | 1.23  | 8.1%   |
| Ptges3  | 33.3305     | 1.73  | 5.2%   |
| Ptgfr   | 0.09586382  | 0.03  | 32.9%  |
| Ptgfrn  | 7.15798     | 0.34  | 4.8%   |
| Ptgir   | 0.010248076 | 0.01  | 69.0%  |
| Ptgis   | 5.181984    | 0.68  | 13.1%  |
| Ptgs1   | 0.07061206  | 0.01  | 18.2%  |
| Ptgs2   | 0.2114012   | 0.06  | 30.4%  |
| Pth     | 0.0149816   | 0.02  | 137.6% |
| Pthb1   | 0.02417414  | 0.00  | 19.6%  |
| Pthlh   | 3.022696    | 0.26  | 8.7%   |
| Pthr1   | 2.299298    | 0.41  | 18.0%  |
| Pthr2   | 0.2277582   | 0.05  | 23.1%  |
| Ptk2    | 11.41718    | 0.62  | 5.5%   |
| Ptk2b   | 0.298871    | 0.02  | 6.2%   |
| Ptk6    | 0.05172744  | 0.03  | 67.6%  |
| Ptk7    | 5.501566    | 0.40  | 7.3%   |
| Ptma    | 14.91186    | 1.36  | 9.1%   |
| Ptms    | 159.0674    | 21.37 | 13.4%  |
| Ptn     | 93.6302     | 9.85  | 10.5%  |
| Ptov1   | 62.72806    | 3.91  | 6.2%   |
| Ptp4a1  | 7.266412    | 0.52  | 7.1%   |
| Ptp4a2  | 25.84084    | 0.59  | 2.3%   |
| Ptp4a3  | 10.756994   | 1.57  | 14.6%  |
| ptpc1   | 1.4185846   | 0.55  | 38.5%  |
| Ptpdc1  | 6.075478    | 0.62  | 10.2%  |
| Ptpla   | 2.890268    | 0.45  | 15.6%  |
| Ptplad1 | 78.27416    | 1.90  | 2.4%   |
| Ptplad2 | 0.767092    | 0.08  | 10.9%  |
| Ptplb   | 3.279474    | 0.18  | 5.6%   |
| Ptpmt1  | 8.317346    | 0.19  | 2.3%   |
| Ptpn1   | 6.455368    | 0.54  | 8.3%   |
| Ptpn11  | 22.28718    | 0.73  | 3.3%   |
| Ptpn12  | 8.368478    | 0.46  | 5.5%   |
| Ptpn13  | 0.6938392   | 0.06  | 8.5%   |
| Ptpn14  | 0.6506934   | 0.08  | 12.2%  |
| Ptpn18  | 0.11357762  | 0.09  | 75.5%  |

|         |             |      |        |
|---------|-------------|------|--------|
| Ptpn2   | 3.480096    | 0.27 | 7.8%   |
| Ptpn20  | 0.00243442  | 0.01 | 223.6% |
| Ptpn21  | 1.308214    | 0.13 | 10.3%  |
| Ptpn22  | 0.14653544  | 0.10 | 69.1%  |
| Ptpn23  | 15.45164    | 0.82 | 5.3%   |
| Ptpn3   | 1.561872    | 0.21 | 13.7%  |
| Ptpn4   | 8.63363     | 1.20 | 13.9%  |
| Ptpn5   | 40.14278    | 4.10 | 10.2%  |
| Ptpn6   | 0.10577354  | 0.03 | 30.7%  |
| Ptpn7   | 0.008701544 | 0.01 | 71.5%  |
| Ptpn9   | 12.02546    | 0.72 | 6.0%   |
| Ptpra   | 27.70354    | 0.88 | 3.2%   |
| Ptprb   | 0.03378676  | 0.01 | 35.1%  |
| Ptprc   | 0.00145246  | 0.00 | 223.6% |
| Ptprcap | 0.09331794  | 0.05 | 56.5%  |
| Ptprd   | 28.29826    | 2.35 | 8.3%   |
| Ptpre   | 3.055802    | 0.23 | 7.5%   |
| Ptprf   | 13.83398    | 0.47 | 3.4%   |
| Ptprg   | 15.86192    | 0.77 | 4.8%   |
| Ptprh   | 0.0496168   | 0.03 | 59.9%  |
| Ptprij  | 5.673712    | 0.16 | 2.8%   |
| Ptprik  | 11.90876    | 0.28 | 2.3%   |
| Ptpirm  | 7.45406     | 0.18 | 2.4%   |
| Ptpirn  | 75.25406    | 1.66 | 2.2%   |
| Ptpirn2 | 59.37984    | 2.54 | 4.3%   |
| Ptpro   | 14.77758    | 1.38 | 9.3%   |
| Ptprq   | 0           | 0.00 |        |
| Ptprrr  | 5.52492     | 0.31 | 5.6%   |
| Ptprs   | 68.4817     | 2.00 | 2.9%   |
| Ptprt   | 14.15774    | 1.95 | 13.8%  |
| Ptpru   | 3.850198    | 0.14 | 3.7%   |
| Ptprv   | 0.5971602   | 0.09 | 14.6%  |
| Ptprz1  | 15.15744    | 1.29 | 8.5%   |
| Ptrf    | 1.67581     | 0.31 | 18.7%  |
| Ptrh1   | 4.52861     | 0.56 | 12.3%  |
| Ptrh2   | 4.10899     | 0.41 | 10.0%  |
| Pts     | 6.62069     | 0.72 | 10.9%  |
| Pttg1   | 0.8165988   | 0.25 | 31.1%  |
| Pttg1ip | 11.63048    | 0.90 | 7.7%   |
| Ptx3    | 0.0787272   | 0.01 | 9.6%   |
| Puf60   | 62.15232    | 5.12 | 8.2%   |
| Pum1    | 15.8808     | 0.61 | 3.8%   |
| Pum2    | 25.92326    | 1.40 | 5.4%   |
| Punc    | 0.6849206   | 0.06 | 9.3%   |
| Pura    | 9.568272    | 1.23 | 12.9%  |
| Purb    | 13.83684    | 0.58 | 4.2%   |
| Purg    | 6.570882    | 0.61 | 9.2%   |

|         |            |      |        |
|---------|------------|------|--------|
| Pus1    | 7.804492   | 0.38 | 4.9%   |
| Pus3    | 4.412988   | 0.24 | 5.5%   |
| Pus7    | 1.967788   | 0.26 | 13.2%  |
| Pus7l   | 1.3485     | 0.22 | 16.4%  |
| Pusl1   | 6.8766     | 0.41 | 6.0%   |
| Pvalb   | 5.773684   | 1.59 | 27.5%  |
| Pvr     | 1.238654   | 0.10 | 7.7%   |
| Pvrl1   | 19.80626   | 2.53 | 12.8%  |
| Pvrl2   | 8.902372   | 0.90 | 10.1%  |
| Pvrl3   | 7.036862   | 0.44 | 6.2%   |
| Pvrl4   | 0.06506958 | 0.02 | 26.0%  |
| Pwp1    | 6.984474   | 0.65 | 9.3%   |
| Pwp2    | 4.334014   | 0.21 | 4.9%   |
| Pwwp2   | 1.780544   | 0.21 | 11.7%  |
| Pxdn    | 9.654206   | 0.63 | 6.5%   |
| Pxk     | 13.29438   | 0.28 | 2.1%   |
| Pxmp2   | 0.9880712  | 0.17 | 17.2%  |
| Pxmp3   | 15.5972    | 1.25 | 8.0%   |
| Pxmp4   | 5.93818    | 0.67 | 11.2%  |
| Pxn     | 3.010902   | 0.26 | 8.8%   |
| Pxt1    | 0.0052473  | 0.01 | 223.6% |
| Pycard  | 0.04063648 | 0.02 | 47.8%  |
| Pycr1   | 2.147162   | 0.57 | 26.4%  |
| Pycr2   | 7.551522   | 0.29 | 3.8%   |
| Pycl    | 14.93132   | 1.58 | 10.5%  |
| Pygb    | 54.96342   | 2.18 | 4.0%   |
| Pygl    | 0.11055574 | 0.04 | 35.1%  |
| Pygm    | 0.1806258  | 0.05 | 26.1%  |
| Pygo1   | 10.022964  | 1.07 | 10.7%  |
| Pygo2   | 13.5696    | 0.51 | 3.8%   |
| Pyhin1  | 0.00753164 | 0.01 | 139.3% |
| Pyroxd1 | 3.879176   | 0.19 | 4.9%   |
| Pyy     | 0.01364534 | 0.03 | 223.6% |
| Pzp     | 0.03605852 | 0.02 | 62.5%  |
| Qars    | 16.803     | 1.71 | 10.2%  |
| qbrick  | 0.06553942 | 0.02 | 23.2%  |
| Qdpr    | 53.75714   | 3.34 | 6.2%   |
| Qil1    | 0.11510488 | 0.02 | 20.3%  |
| Qk      | 24.90942   | 1.14 | 4.6%   |
| Qpct    | 8.430994   | 0.73 | 8.7%   |
| Qpctl   | 6.696598   | 0.28 | 4.2%   |
| Qprt    | 0.0133417  | 0.01 | 92.8%  |
| Qrfp    | 0.02086912 | 0.01 | 66.1%  |
| Qrich1  | 23.37084   | 0.22 | 1.0%   |
| Qrich2  | 0.00628188 | 0.01 | 155.5% |
| Qrs1    | 6.666792   | 0.58 | 8.7%   |
| Qscn6   | 0.2775072  | 0.11 | 39.2%  |

|           |            |      |       |
|-----------|------------|------|-------|
| Qscn6l1   | 3.6127     | 0.27 | 7.6%  |
| Qser1     | 2.98973    | 0.20 | 6.8%  |
| Qsox1     | 11.01254   | 0.74 | 6.7%  |
| Qsox2     | 2.58621    | 0.30 | 11.6% |
| Qtrt1     | 3.222228   | 0.32 | 10.0% |
| Qtrtd1    | 3.100022   | 0.37 | 11.9% |
| R3hcc1    | 16.97468   | 1.90 | 11.2% |
| R3hdm1    | 26.5594    | 0.80 | 3.0%  |
| R3hdm2    | 23.95266   | 1.51 | 6.3%  |
| R74862    | 5.898838   | 1.23 | 20.9% |
| Rab1      | 102.89388  | 4.12 | 4.0%  |
| Rab10     | 62.58832   | 4.70 | 7.5%  |
| Rab11a    | 96.23746   | 3.24 | 3.4%  |
| Rab11b    | 12.76214   | 0.96 | 7.5%  |
| Rab11fip1 | 0.5173014  | 0.02 | 3.9%  |
| Rab11fip2 | 18.73306   | 0.93 | 5.0%  |
| Rab11fip3 | 11.95216   | 0.40 | 3.4%  |
| Rab11fip4 | 24.06136   | 1.82 | 7.5%  |
| Rab11fip5 | 34.71466   | 0.63 | 1.8%  |
| Rab12     | 31.18938   | 1.83 | 5.9%  |
| Rab13     | 1.666354   | 0.28 | 16.6% |
| Rab14     | 84.07046   | 4.62 | 5.5%  |
| Rab15     | 26.73942   | 1.42 | 5.3%  |
| Rab17     | 0.0375126  | 0.02 | 61.0% |
| Rab18     | 88.6038    | 1.40 | 1.6%  |
| Rab19     | 0.02219026 | 0.02 | 86.4% |
| Rab1A     | 0.24396674 | 0.09 | 35.7% |
| Rab1b     | 48.42856   | 3.20 | 6.6%  |
| Rab2      | 87.56754   | 1.90 | 2.2%  |
| Rab20     | 0.08476156 | 0.06 | 75.6% |
| Rab21     | 32.45436   | 0.78 | 2.4%  |
| Rab22a    | 8.249962   | 0.79 | 9.5%  |
| Rab22A    | 1.347722   | 0.35 | 26.2% |
| Rab22B    | 0.2667702  | 0.08 | 30.0% |
| Rab23     | 6.295366   | 0.31 | 5.0%  |
| Rab24     | 13.03502   | 0.27 | 2.1%  |
| Rab25     | 0.04459474 | 0.04 | 98.7% |
| Rab26     | 1.515752   | 0.26 | 17.3% |
| Rab27a    | 1.603594   | 0.17 | 10.4% |
| Rab27b    | 6.773604   | 0.57 | 8.4%  |
| Rab28     | 20.74706   | 0.82 | 4.0%  |
| Rab29     | 0.271298   | 0.08 | 28.8% |
| Rab2A     | 1.331908   | 0.71 | 53.6% |
| Rab2b     | 16.2253    | 0.74 | 4.6%  |
| Rab2B     | 0.6197944  | 0.27 | 43.3% |
| Rab30     | 8.957292   | 0.99 | 11.1% |
| Rab31     | 17.72632   | 1.27 | 7.2%  |

|          |             |       |        |
|----------|-------------|-------|--------|
| Rab32    | 0.4053594   | 0.08  | 18.8%  |
| Rab33a   | 13.06406    | 2.81  | 21.5%  |
| Rab33b   | 6.846068    | 0.70  | 10.3%  |
| Rab34    | 7.222946    | 0.48  | 6.6%   |
| Rab35    | 26.54464    | 1.42  | 5.3%   |
| Rab36    | 5.045152    | 0.23  | 4.5%   |
| Rab37    | 0.13153466  | 0.03  | 19.8%  |
| Rab38    | 0.3676256   | 0.11  | 30.8%  |
| Rab39    | 0.76691     | 0.09  | 11.1%  |
| Rab39b   | 22.6995     | 0.73  | 3.2%   |
| Rab3a    | 284.787     | 8.13  | 2.9%   |
| Rab3b    | 10.584106   | 1.68  | 15.9%  |
| Rab3c    | 58.7761     | 5.34  | 9.1%   |
| Rab3d    | 4.736842    | 0.72  | 15.2%  |
| Rab3gap1 | 14.6174     | 0.40  | 2.7%   |
| Rab3gap2 | 17.35518    | 1.02  | 5.9%   |
| Rab3il1  | 2.788928    | 0.33  | 11.7%  |
| Rab3ip   | 6.837496    | 0.34  | 5.0%   |
| Rab40b   | 1.869714    | 0.10  | 5.4%   |
| Rab40c   | 11.93754    | 0.39  | 3.2%   |
| Rab40C   | 0.2192032   | 0.07  | 31.7%  |
| Rab41    | 0.2815292   | 0.06  | 22.7%  |
| Rab42    | 0.004900795 | 0.01  | 118.6% |
| Rab43    | 4.21234     | 0.12  | 2.9%   |
| Rab4a    | 20.84306    | 0.90  | 4.3%   |
| Rab4b    | 40.27932    | 3.18  | 7.9%   |
| Rab4B    | 0.17525614  | 0.10  | 56.4%  |
| Rab5a    | 35.15032    | 1.12  | 3.2%   |
| Rab5b    | 29.53284    | 1.08  | 3.7%   |
| Rab5c    | 46.86576    | 2.27  | 4.8%   |
| Rab6     | 164.2664    | 7.62  | 4.6%   |
| Rab6b    | 201.4122    | 8.92  | 4.4%   |
| Rab6ip1  | 36.70084    | 0.39  | 1.1%   |
| Rab7     | 25.3578     | 1.40  | 5.5%   |
| Rab7b    | 0.01294156  | 0.01  | 65.4%  |
| Rab7l1   | 0.4115958   | 0.07  | 18.1%  |
| Rab8a    | 13.05148    | 1.11  | 8.5%   |
| Rab8A    | 0.2708118   | 0.11  | 39.7%  |
| Rab8b    | 5.197196    | 0.62  | 12.0%  |
| Rab8B    | 2.475186    | 0.30  | 12.3%  |
| Rab9     | 16.54828    | 0.79  | 4.7%   |
| Rab9b    | 21.2312     | 1.07  | 5.1%   |
| Rabac1   | 101.918     | 11.74 | 11.5%  |
| Rabep1   | 37.51048    | 1.68  | 4.5%   |
| Rabep2   | 1.919038    | 0.31  | 16.0%  |
| Rabepk   | 6.368044    | 0.43  | 6.7%   |
| Rabgap1  | 25.11026    | 1.08  | 4.3%   |

|                |            |      |        |
|----------------|------------|------|--------|
| Rabgap1l       | 29.45602   | 1.23 | 4.2%   |
| Rabgef1        | 10.416984  | 0.44 | 4.2%   |
| Rabggta        | 10.7442    | 0.59 | 5.5%   |
| Rabggtb        | 33.01908   | 1.22 | 3.7%   |
| Rabif          | 20.39146   | 1.10 | 5.4%   |
| Rabj           | 0.1382036  | 0.04 | 32.5%  |
| Rab12a         | 13.05054   | 0.55 | 4.2%   |
| Rab13          | 5.644896   | 0.47 | 8.3%   |
| Rab14          | 14.29884   | 2.17 | 15.2%  |
| Rab15          | 20.44682   | 0.35 | 1.7%   |
| Rac1           | 84.35034   | 1.98 | 2.3%   |
| Rac2           | 0.2174334  | 0.05 | 24.4%  |
| Rac3           | 47.71828   | 7.88 | 16.5%  |
| Racgap1        | 4.75801    | 0.29 | 6.1%   |
| Rad1           | 4.365178   | 0.55 | 12.6%  |
| Rad17          | 3.397006   | 0.26 | 7.6%   |
| Rad18          | 2.01978    | 0.12 | 6.0%   |
| Rad18sc        | 0.11098134 | 0.03 | 28.2%  |
| Rad21          | 49.79336   | 0.58 | 1.2%   |
| Rad23a         | 21.69072   | 1.24 | 5.7%   |
| Rad23b         | 61.21148   | 3.18 | 5.2%   |
| Rad50          | 2.559766   | 0.16 | 6.1%   |
| Rad51          | 0.9472184  | 0.05 | 5.3%   |
| Rad51ap1       | 1.0555786  | 0.19 | 17.5%  |
| Rad51c         | 0.7211334  | 0.04 | 6.0%   |
| Rad51l1        | 0.08610516 | 0.05 | 61.3%  |
| Rad51l3        | 1.4528794  | 1.09 | 75.3%  |
| Rad52          | 3.756952   | 0.09 | 2.4%   |
| Rad54l         | 2.63286    | 0.52 | 19.8%  |
| Rad54l2        | 4.246324   | 0.14 | 3.4%   |
| Rad9           | 6.421758   | 0.28 | 4.4%   |
| Rad9b          | 3.48696    | 0.51 | 14.6%  |
| radical-fringe | 0.7061228  | 0.36 | 50.9%  |
| Rae1           | 12.67252   | 0.73 | 5.7%   |
| Raet1a         | 0.051878   | 0.02 | 33.4%  |
| Raet1c         | 0.04626352 | 0.06 | 132.7% |
| Raet1d         | 0.06678196 | 0.04 | 67.3%  |
| Raet1e         | 0.169625   | 0.04 | 25.0%  |
| Raf1           | 29.21838   | 0.95 | 3.2%   |
| Rag1           | 0.01642146 | 0.02 | 93.3%  |
| Rag1ap1        | 5.29066    | 0.65 | 12.3%  |
| Rag2           | 0          | 0.00 |        |
| Rage           | 1.940522   | 0.23 | 11.8%  |
| Rai1           | 8.590804   | 1.84 | 21.4%  |
| Rai12          | 26.52432   | 2.09 | 7.9%   |
| Rai14          | 1.497064   | 0.22 | 14.9%  |
| Rai16          | 11.54696   | 0.56 | 4.8%   |

|          |            |      |        |
|----------|------------|------|--------|
| Rai2     | 5.13674    | 0.21 | 4.0%   |
| Rala     | 44.48698   | 6.70 | 15.1%  |
| Ralb     | 12.6531    | 1.00 | 7.9%   |
| Ralbp1   | 16.87588   | 0.48 | 2.8%   |
| Ralgds   | 18.42852   | 2.60 | 14.1%  |
| Ralgps1  | 9.042826   | 0.69 | 7.6%   |
| Ralgps2  | 8.223068   | 0.61 | 7.4%   |
| Raly     | 38.09456   | 2.25 | 5.9%   |
| Ralyl    | 70.96528   | 2.33 | 3.3%   |
| ramp     | 0.15446    | 0.03 | 18.9%  |
| Ramp1    | 0.3048392  | 0.09 | 28.8%  |
| RAMP1    | 0.08850588 | 0.04 | 43.7%  |
| Ramp2    | 6.187886   | 0.76 | 12.3%  |
| Ramp3    | 16.0218    | 2.29 | 14.3%  |
| Ran      | 30.61876   | 0.51 | 1.7%   |
| Ranbp1   | 27.71656   | 1.75 | 6.3%   |
| Ranbp10  | 6.929944   | 0.16 | 2.3%   |
| Ranbp17  | 2.795498   | 0.39 | 13.9%  |
| Ranbp2   | 11.13037   | 0.85 | 7.6%   |
| Ranbp3   | 21.22336   | 1.74 | 8.2%   |
| Ranbp3l  | 0.01733714 | 0.01 | 69.9%  |
| RanBP4   | 0.498639   | 0.13 | 26.7%  |
| Ranbp5   | 18.98452   | 0.83 | 4.4%   |
| Ranbp6   | 34.21396   | 0.80 | 2.3%   |
| Ranbp9   | 21.3452    | 0.68 | 3.2%   |
| Rangap1  | 65.479     | 1.44 | 2.2%   |
| Rangrf   | 0.3696626  | 0.09 | 23.1%  |
| RANK     | 0.10265274 | 0.06 | 53.8%  |
| Rap1a    | 3.991508   | 0.29 | 7.4%   |
| Rap1b    | 29.05664   | 2.28 | 7.9%   |
| Rap1gap  | 47.18726   | 2.36 | 5.0%   |
| Rap1gds1 | 90.8246    | 1.66 | 1.8%   |
| Rap2a    | 23.91488   | 0.80 | 3.3%   |
| Rap2b    | 6.868698   | 0.19 | 2.8%   |
| Rap2c    | 13.04884   | 0.69 | 5.3%   |
| Rapgef1  | 17.79572   | 0.45 | 2.5%   |
| Rapgef2  | 8.581324   | 0.21 | 2.4%   |
| Rapgef3  | 0.711127   | 0.06 | 8.9%   |
| Rapgef4  | 33.59446   | 0.91 | 2.7%   |
| Rapgef5  | 7.40494    | 0.47 | 6.3%   |
| Rapgef6  | 13.523     | 0.72 | 5.3%   |
| Rapgef11 | 20.39398   | 0.55 | 2.7%   |
| Raph1    | 14.2594    | 1.15 | 8.1%   |
| Rapsn    | 0.00741928 | 0.01 | 141.7% |
| raptor   | 1.5079736  | 0.49 | 32.2%  |
| Raptor   | 0.08023742 | 0.05 | 65.2%  |
| Rara     | 2.499712   | 0.41 | 16.6%  |



|          |             |      |        |
|----------|-------------|------|--------|
| Rarb     | 9.883884    | 2.43 | 24.5%  |
| Rarg     | 1.873218    | 0.29 | 15.5%  |
| Rarres1  | 0.1401017   | 0.07 | 48.7%  |
| Rarres2  | 0.3531754   | 0.19 | 54.4%  |
| Rars     | 22.05       | 1.33 | 6.1%   |
| Rars2    | 9.951818    | 0.90 | 9.0%   |
| Rasa1    | 16.20468    | 1.08 | 6.7%   |
| Rasa2    | 4.524546    | 0.50 | 11.2%  |
| Rasa3    | 8.40734     | 0.27 | 3.3%   |
| Rasa4    | 0.3206738   | 0.11 | 35.6%  |
| Rasal1   | 0.1179242   | 0.01 | 11.6%  |
| Rasal2   | 4.250506    | 0.56 | 13.3%  |
| Rasd1    | 0.2695314   | 0.07 | 26.5%  |
| Rasd2    | 6.409198    | 0.85 | 13.2%  |
| Rasef    | 0.05808422  | 0.02 | 39.1%  |
| Rasgef1a | 7.378876    | 0.52 | 7.1%   |
| Rasgef1b | 5.756292    | 0.26 | 4.5%   |
| Rasgef1c | 2.469232    | 0.26 | 10.4%  |
| Rasgrf1  | 71.10814    | 7.27 | 10.2%  |
| Rasgrf2  | 11.939742   | 1.49 | 12.5%  |
| Rasgrp   | 0.0491199   | 0.01 | 15.5%  |
| Rasgrp1  | 0.3629016   | 0.09 | 24.4%  |
| Rasgrp2  | 46.36914    | 2.25 | 4.8%   |
| Rasgrp3  | 0.012984132 | 0.01 | 112.9% |
| Rasgrp4  | 3.0499098   | 3.77 | 123.5% |
| Rasip1   | 0.8507542   | 0.19 | 21.9%  |
| Rasl10a  | 0.9543738   | 0.31 | 33.0%  |
| Rasl10b  | 54.3468     | 2.63 | 4.8%   |
| Rasl11a  | 0.193808    | 0.02 | 10.3%  |
| Rasl11b  | 1.218448    | 0.22 | 18.0%  |
| Rasl12   | 0.03443316  | 0.03 | 75.9%  |
| Rasl2-9  | 1.671336    | 0.18 | 10.9%  |
| Rassf1   | 4.832766    | 0.46 | 9.5%   |
| Rassf2   | 4.874316    | 0.25 | 5.2%   |
| Rassf3   | 2.179386    | 0.25 | 11.5%  |
| Rassf4   | 14.39322    | 0.62 | 4.3%   |
| Rassf5   | 23.4453     | 0.95 | 4.1%   |
| Rassf6   | 0.3457208   | 0.12 | 35.8%  |
| Rassf7   | 2.465682    | 0.12 | 4.9%   |
| Rassf8   | 8.212456    | 0.36 | 4.4%   |
| Raver1   | 6.161278    | 0.60 | 9.7%   |
| Raver2   | 2.407724    | 0.25 | 10.5%  |
| Rax      | 0.02279812  | 0.02 | 77.1%  |
| Rb1      | 4.641014    | 0.72 | 15.6%  |
| Rb1cc1   | 11.95192    | 0.95 | 8.0%   |
| Rbak     | 2.196872    | 0.14 | 6.5%   |
| Rbbp4    | 20.17146    | 1.38 | 6.9%   |

|        |            |      |       |
|--------|------------|------|-------|
| Rbbp5  | 6.44307    | 0.27 | 4.2%  |
| Rbbp6  | 6.767988   | 0.27 | 4.1%  |
| Rbbp7  | 43.15344   | 4.16 | 9.6%  |
| Rbbp8  | 1.506262   | 0.25 | 16.5% |
| Rbbp9  | 5.551128   | 0.40 | 7.2%  |
| Rbck1  | 16.88834   | 0.79 | 4.7%  |
| Rbed1  | 2.629624   | 0.15 | 5.8%  |
| Rbj    | 35.7882    | 3.55 | 9.9%  |
| Rbks   | 0.5379336  | 0.14 | 25.6% |
| Rbl1   | 0.5439646  | 0.13 | 24.4% |
| Rbl2   | 6.29776    | 0.48 | 7.6%  |
| Rbm10  | 3.961742   | 0.25 | 6.2%  |
| Rbm11  | 5.454704   | 0.55 | 10.1% |
| Rbm12  | 8.466324   | 0.70 | 8.3%  |
| Rbm12b | 1.211906   | 0.15 | 12.3% |
| Rbm13  | 8.266294   | 0.60 | 7.2%  |
| Rbm14  | 10.640082  | 1.31 | 12.3% |
| Rbm15  | 1.59578    | 0.24 | 14.8% |
| Rbm15b | 8.09941    | 0.55 | 6.8%  |
| Rbm16  | 15.21638   | 0.77 | 5.1%  |
| Rbm17  | 10.36247   | 0.48 | 4.6%  |
| Rbm18  | 21.50902   | 0.60 | 2.8%  |
| Rbm19  | 3.54817    | 0.35 | 10.0% |
| Rbm20  | 0.2111846  | 0.05 | 25.5% |
| Rbm22  | 8.589002   | 0.72 | 8.3%  |
| Rbm24  | 0.7367634  | 0.04 | 5.1%  |
| Rbm25  | 14.56064   | 1.38 | 9.5%  |
| Rbm26  | 22.60756   | 0.81 | 3.6%  |
| Rbm27  | 4.434798   | 0.42 | 9.5%  |
| Rbm28  | 6.30113    | 0.27 | 4.2%  |
| Rbm3   | 8.212106   | 1.00 | 12.2% |
| Rbm34  | 7.227622   | 0.43 | 5.9%  |
| Rbm35a | 0.14406426 | 0.05 | 32.6% |
| Rbm35b | 0.09767348 | 0.03 | 32.4% |
| Rbm38  | 0.935044   | 0.13 | 13.4% |
| Rbm39  | 44.63494   | 1.21 | 2.7%  |
| Rbm4   | 4.153556   | 0.29 | 7.1%  |
| Rbm41  | 1.35054    | 0.23 | 17.3% |
| Rbm43  | 5.643192   | 0.31 | 5.6%  |
| Rbm44  | 0.00644893 | 0.01 | 93.0% |
| Rbm45  | 8.28423    | 0.32 | 3.8%  |
| Rbm4b  | 8.695246   | 0.68 | 7.8%  |
| Rbm5   | 31.72028   | 1.62 | 5.1%  |
| Rbm6   | 7.947246   | 0.33 | 4.1%  |
| Rbm7   | 7.519962   | 0.53 | 7.0%  |
| Rbm8a  | 12.80456   | 1.14 | 8.9%  |
| Rbm9   | 74.32918   | 4.78 | 6.4%  |

|         |             |      |        |
|---------|-------------|------|--------|
| Rbms1   | 12.60308    | 0.85 | 6.7%   |
| Rbms2   | 1.755048    | 0.21 | 12.1%  |
| Rbms3   | 15.10758    | 1.22 | 8.1%   |
| Rbmx    | 13.37896    | 0.70 | 5.2%   |
| Rbmx2   | 2.432266    | 0.21 | 8.7%   |
| Rbmxl2  | 0.02246294  | 0.02 | 108.3% |
| Rbmxrt  | 6.292056    | 0.74 | 11.8%  |
| Rbmy1a1 | 0           | 0.00 |        |
| Rbp1    | 0.9638986   | 0.16 | 16.5%  |
| Rbp2    | 0.03855556  | 0.04 | 104.4% |
| Rbp3    | 0.001412234 | 0.00 | 223.6% |
| Rbp4    | 2.53074     | 0.47 | 18.5%  |
| Rbp7    | 0.02261446  | 0.03 | 139.8% |
| Rbpj    | 3.222026    | 0.15 | 4.6%   |
| Rbpjl   | 0.0757228   | 0.17 | 223.6% |
| Rbpms   | 1.566574    | 0.23 | 14.7%  |
| Rbpms2  | 0.5607818   | 0.11 | 19.9%  |
| Rbx1    | 53.70442    | 1.38 | 2.6%   |
| Rc3h1   | 3.637102    | 0.36 | 9.9%   |
| Rc3h2   | 10.640048   | 0.66 | 6.2%   |
| Rcan1   | 16.37806    | 1.62 | 9.9%   |
| Rcan2   | 39.89346    | 1.65 | 4.1%   |
| Rcan3   | 22.14798    | 1.55 | 7.0%   |
| Rcbtb1  | 9.023904    | 0.72 | 8.0%   |
| Rcbtb2  | 9.016712    | 1.14 | 12.6%  |
| Rcc1    | 4.782604    | 0.23 | 4.8%   |
| Rcc2    | 9.691624    | 0.80 | 8.2%   |
| Rccd1   | 2.59563     | 0.29 | 11.3%  |
| Rce1    | 6.409728    | 0.40 | 6.3%   |
| Rchy1   | 12.06004    | 1.23 | 10.2%  |
| Rcl1    | 8.801574    | 0.51 | 5.8%   |
| Rcn1    | 10.841908   | 0.80 | 7.4%   |
| Rcn2    | 42.21152    | 1.49 | 3.5%   |
| Rcn3    | 5.494038    | 1.41 | 25.7%  |
| Rcor1   | 2.780282    | 0.48 | 17.3%  |
| Rcor2   | 2.05864     | 0.18 | 8.9%   |
| Rcor3   | 7.298628    | 0.94 | 12.9%  |
| Rcsd1   | 1.561032    | 0.25 | 15.8%  |
| Rcvrn   | 0.0659175   | 0.05 | 78.6%  |
| Rdbp    | 4.910128    | 0.64 | 13.0%  |
| Rdh1    | 0.02053424  | 0.02 | 74.4%  |
| Rdh10   | 4.369442    | 0.34 | 7.7%   |
| Rdh11   | 19.36132    | 2.18 | 11.3%  |
| Rdh12   | 0.06432094  | 0.04 | 57.7%  |
| Rdh13   | 13.58292    | 0.23 | 1.7%   |
| Rdh14   | 10.9674     | 0.82 | 7.5%   |
| Rdh16   | 0.01394854  | 0.01 | 79.5%  |

|        |            |      |        |
|--------|------------|------|--------|
| Rdh5   | 0.3657778  | 0.13 | 34.4%  |
| Rdh7   | 0          | 0.00 |        |
| Rdh8   | 0          | 0.00 |        |
| Rdh9   | 0.2480976  | 0.04 | 17.1%  |
| Rdhe2  | 0          | 0.00 |        |
| Rdhs   | 0.01551098 | 0.02 | 102.0% |
| Rdm1   | 0.4025204  | 0.05 | 11.3%  |
| Rdx    | 34.16618   | 0.94 | 2.8%   |
| Rec8   | 1.2591534  | 0.20 | 15.8%  |
| Recc1  | 0.080861   | 0.04 | 46.2%  |
| Reck   | 1.995278   | 0.33 | 16.4%  |
| Recql  | 4.18211    | 0.30 | 7.1%   |
| Recql4 | 1.2458034  | 0.32 | 25.4%  |
| Recql5 | 3.900736   | 0.37 | 9.4%   |
| Reep1  | 99.06536   | 3.12 | 3.2%   |
| Reep2  | 55.41708   | 3.03 | 5.5%   |
| Reep3  | 5.266746   | 0.30 | 5.7%   |
| Reep4  | 0.9409996  | 0.07 | 6.9%   |
| Reep5  | 240.6368   | 5.79 | 2.4%   |
| Reep6  | 7.912238   | 0.61 | 7.7%   |
| Refbp2 | 3.348132   | 0.37 | 11.0%  |
| Reg1   | 0.00920296 | 0.02 | 223.6% |
| Reg2   | 0          | 0.00 |        |
| Reg3a  | 0          | 0.00 |        |
| Reg3d  | 0          | 0.00 |        |
| Reg3g  | 0.12926928 | 0.10 | 74.6%  |
| Reg4   | 0.00587124 | 0.01 | 223.6% |
| Rel    | 0.435749   | 0.08 | 18.9%  |
| Rela   | 7.052568   | 0.40 | 5.6%   |
| Relb   | 1.825818   | 0.30 | 16.5%  |
| Rel1   | 0.9741604  | 0.11 | 10.9%  |
| Rel2   | 65.486     | 3.79 | 5.8%   |
| Reln   | 41.66184   | 2.13 | 5.1%   |
| Relt   | 3.47073    | 0.77 | 22.2%  |
| Rem1   | 0          | 0.00 |        |
| Rem2   | 1.704712   | 0.49 | 28.5%  |
| Ren1   | 0.00384482 | 0.01 | 223.6% |
| Renbp  | 2.539482   | 0.53 | 20.7%  |
| Repin1 | 8.13801    | 0.50 | 6.1%   |
| Reps1  | 18.40422   | 0.82 | 4.5%   |
| Reps2  | 13.254688  | 2.52 | 19.0%  |
| Rer1   | 34.08932   | 2.75 | 8.1%   |
| Rere   | 28.67548   | 1.44 | 5.0%   |
| Rerg   | 10.285432  | 0.72 | 7.0%   |
| Resp18 | 27.23242   | 2.52 | 9.3%   |
| Rest   | 0.8785134  | 0.07 | 8.4%   |
| Ret    | 4.278404   | 0.25 | 5.8%   |

|         |            |      |        |
|---------|------------|------|--------|
| Retn    | 0.0762298  | 0.04 | 57.1%  |
| Retnla  | 0          | 0.00 |        |
| Retnlb  | 0          | 0.00 |        |
| Retnlg  | 0          | 0.00 |        |
| Retsat  | 1.89036    | 0.24 | 12.8%  |
| Rev1    | 5.160224   | 0.11 | 2.2%   |
| Rev3l   | 13.65962   | 1.00 | 7.3%   |
| Rex2    | 0.16444836 | 0.18 | 108.7% |
| Rexo1   | 6.478902   | 0.45 | 7.0%   |
| Rexo2   | 18.29802   | 1.01 | 5.5%   |
| Rexo4   | 9.050938   | 0.39 | 4.4%   |
| Rfc1    | 6.131528   | 0.39 | 6.4%   |
| Rfc2    | 12.66288   | 1.35 | 10.6%  |
| Rfc3    | 4.433152   | 0.68 | 15.4%  |
| Rfc4    | 2.129208   | 0.39 | 18.4%  |
| Rfc5    | 2.056454   | 0.20 | 9.7%   |
| Rfesd   | 7.798386   | 0.74 | 9.5%   |
| Rffl    | 4.195968   | 1.05 | 25.0%  |
| Rfg     | 0.5433584  | 0.15 | 28.0%  |
| Rfk     | 55.78896   | 1.92 | 3.5%   |
| Rfng    | 23.09874   | 0.90 | 3.9%   |
| Rfpl4   | 0.0048076  | 0.01 | 223.6% |
| Rft1    | 4.43605    | 0.28 | 6.3%   |
| Rftn1   | 6.388044   | 0.67 | 10.5%  |
| Rftn2   | 0.6588214  | 0.10 | 14.5%  |
| Rfwd2   | 2.0881     | 0.15 | 7.3%   |
| Rfwd3   | 2.584716   | 0.09 | 3.5%   |
| Rfx1    | 3.3839     | 0.21 | 6.1%   |
| Rfx2    | 0.1662894  | 0.05 | 27.9%  |
| Rfx3    | 1.76413    | 0.16 | 9.2%   |
| Rfx4    | 2.307456   | 0.34 | 14.9%  |
| Rfx5    | 5.932802   | 1.08 | 18.2%  |
| Rfxank  | 2.330306   | 0.84 | 36.0%  |
| Rfxap   | 11.52408   | 0.66 | 5.8%   |
| Rfxdc1  | 0.01931306 | 0.02 | 86.4%  |
| Rfxdc2  | 10.51258   | 0.33 | 3.1%   |
| Rg9mtd1 | 6.476108   | 0.57 | 8.8%   |
| Rg9mtd2 | 1.79171    | 0.35 | 19.3%  |
| Rg9mtd3 | 5.615556   | 0.33 | 5.9%   |
| Rgag1   | 1.174682   | 0.15 | 13.1%  |
| Rgag4   | 6.343136   | 0.38 | 6.0%   |
| Rgl1    | 7.581526   | 0.85 | 11.2%  |
| Rgl2    | 8.731624   | 1.08 | 12.3%  |
| Rgl3    | 0.1828452  | 0.04 | 24.3%  |
| Rgma    | 9.169654   | 0.84 | 9.2%   |
| Rgmb    | 25.87474   | 0.71 | 2.7%   |
| Rgn     | 0.04564764 | 0.02 | 39.3%  |

|         |             |      |        |
|---------|-------------|------|--------|
| Rgnef   | 1.3916638   | 0.34 | 24.2%  |
| Rgr     | 0.010949498 | 0.01 | 82.7%  |
| Rgs1    | 0.00457596  | 0.01 | 223.6% |
| Rgs10   | 14.46398    | 1.46 | 10.1%  |
| Rgs11   | 8.843606    | 1.68 | 19.0%  |
| Rgs12   | 2.392492    | 0.20 | 8.3%   |
| Rgs13   | 0           | 0.00 |        |
| Rgs14   | 0.00551186  | 0.01 | 142.2% |
| Rgs16   | 0.6220456   | 0.17 | 27.3%  |
| Rgs17   | 28.92034    | 3.23 | 11.2%  |
| Rgs18   | 0           | 0.00 |        |
| Rgs19   | 12.11974    | 1.68 | 13.8%  |
| Rgs2    | 21.45434    | 1.88 | 8.8%   |
| Rgs20   | 5.903022    | 0.77 | 13.1%  |
| Rgs3    | 0.7210458   | 0.09 | 12.3%  |
| Rgs4    | 43.9167     | 2.96 | 6.7%   |
| Rgs5    | 0.03698206  | 0.03 | 93.7%  |
| Rgs6    | 4.96359     | 0.45 | 9.2%   |
| Rgs7    | 20.94136    | 1.59 | 7.6%   |
| RGS7    | 0.1666336   | 0.07 | 42.6%  |
| Rgs7bp  | 19.00406    | 0.26 | 1.4%   |
| Rgs8    | 2.932262    | 0.11 | 3.8%   |
| Rgs9    | 1.815       | 0.27 | 14.8%  |
| RGS9    | 0.7868334   | 0.03 | 4.1%   |
| Rgs9bp  | 0.09831132  | 0.03 | 29.3%  |
| Rhag    | 0.00718786  | 0.01 | 140.4% |
| Rhbdd1  | 3.19691     | 0.17 | 5.2%   |
| Rhbdd2  | 43.10958    | 3.33 | 7.7%   |
| Rhbdd3  | 10.435406   | 0.66 | 6.3%   |
| Rhbdf1  | 4.22693     | 0.43 | 10.2%  |
| Rhbdf2  | 0.427895    | 0.06 | 15.0%  |
| Rhbd11  | 32.45212    | 1.74 | 5.3%   |
| Rhbd12  | 0           | 0.00 |        |
| Rhbd13  | 3.338818    | 0.46 | 13.7%  |
| Rhbg    | 0.01706992  | 0.02 | 103.3% |
| Rhcg    | 0.01020908  | 0.02 | 159.1% |
| Rhd     | 0.03765958  | 0.03 | 81.8%  |
| Rheb    | 57.93172    | 3.82 | 6.6%   |
| Rhebl1  | 2.821686    | 0.24 | 8.5%   |
| Rho     | 0.0655637   | 0.04 | 54.2%  |
| Rhoa    | 28.0812     | 1.48 | 5.3%   |
| Rhob    | 50.39342    | 2.43 | 4.8%   |
| Rhobtb1 | 0.9514242   | 0.15 | 16.1%  |
| Rhobtb2 | 4.465612    | 0.27 | 6.0%   |
| Rhobtb3 | 5.22713     | 0.27 | 5.2%   |
| Rhoc    | 4.952912    | 0.80 | 16.1%  |
| Rhod    | 1.63325     | 0.28 | 17.2%  |

|        |             |      |        |
|--------|-------------|------|--------|
| Rhof   | 13.11634    | 0.24 | 1.8%   |
| Rhog   | 2.865746    | 0.43 | 14.9%  |
| Rhoh   | 0.009923698 | 0.01 | 134.3% |
| Rhoj   | 1.3818096   | 0.26 | 18.7%  |
| Rhoq   | 12.4593     | 1.50 | 12.1%  |
| Rhot1  | 20.00782    | 1.04 | 5.2%   |
| Rhot2  | 11.36268    | 0.89 | 7.8%   |
| Rhou   | 3.619054    | 0.12 | 3.4%   |
| Rhov   | 10.056356   | 0.34 | 3.3%   |
| Rhox1  | 0           | 0.00 |        |
| Rhox10 | 0           | 0.00 |        |
| Rhox11 | 0           | 0.00 |        |
| Rhox12 | 0           | 0.00 |        |
| Rhox2  | 0           | 0.00 |        |
| Rhox3  | 0           | 0.00 |        |
| Rhox4a | 0           | 0.00 |        |
| Rhox4b | 0           | 0.00 |        |
| Rhox4c | 0           | 0.00 |        |
| Rhox4d | 0           | 0.00 |        |
| Rhox4e | 0           | 0.00 |        |
| Rhox4g | 0           | 0.00 |        |
| Rhox4h | 0           | 0.00 |        |
| Rhox6  | 0.0142137   | 0.02 | 137.0% |
| Rhox7  | 0           | 0.00 |        |
| Rhox8  | 0.0035358   | 0.01 | 223.6% |
| Rhox9  | 0.01231516  | 0.02 | 138.9% |
| Rhpn1  | 1.315964    | 0.14 | 10.9%  |
| Rhpn2  | 0.6464232   | 0.18 | 28.3%  |
| Ribc1  | 0.15179128  | 0.04 | 24.0%  |
| Ribc2  | 0.07614884  | 0.03 | 34.8%  |
| Ric3   | 21.0539     | 0.48 | 2.3%   |
| Ric8   | 14.8692     | 0.52 | 3.5%   |
| Ric8b  | 17.83226    | 0.55 | 3.1%   |
| RIE2   | 3.048444    | 2.33 | 76.4%  |
| Rif1   | 6.052666    | 0.33 | 5.4%   |
| Rilp   | 0.3203944   | 0.08 | 25.9%  |
| Rim    | 0.527996    | 0.09 | 17.1%  |
| RIM2   | 1.989582    | 0.46 | 23.3%  |
| Rimbp2 | 5.896558    | 0.31 | 5.2%   |
| Rims1  | 14.3836     | 0.76 | 5.3%   |
| Rims2  | 14.80154    | 0.99 | 6.7%   |
| Rims3  | 21.9256     | 1.84 | 8.4%   |
| Rims4  | 11.63412    | 0.78 | 6.7%   |
| Rin1   | 0.1981902   | 0.03 | 15.5%  |
| Rin2   | 1.869594    | 0.14 | 7.6%   |
| Rin3   | 0.284937    | 0.03 | 10.3%  |
| Ring1  | 7.509094    | 0.78 | 10.4%  |

|          |            |      |        |
|----------|------------|------|--------|
| Rint1    | 3.247048   | 0.09 | 2.7%   |
| Riok1    | 6.113776   | 0.23 | 3.8%   |
| Riok2    | 6.779426   | 0.51 | 7.6%   |
| Riok3    | 22.78052   | 2.15 | 9.5%   |
| Rip3     | 0          | 0.00 |        |
| Ripk1    | 1.321264   | 0.08 | 6.2%   |
| Ripk2    | 1.105913   | 0.14 | 12.3%  |
| Ripk3    | 0.00287324 | 0.01 | 223.6% |
| Ripk4    | 0.4326892  | 0.01 | 3.2%   |
| Ripk5    | 9.576742   | 0.82 | 8.6%   |
| Ripply1  | 0.03105548 | 0.02 | 59.7%  |
| Ripply2  | 0.872083   | 0.21 | 24.5%  |
| Ripply3  | 0.05303468 | 0.03 | 54.7%  |
| Rit1     | 19.57674   | 0.59 | 3.0%   |
| Rit2     | 29.97002   | 1.58 | 5.3%   |
| rjs      | 12.788     | 1.11 | 8.7%   |
| Rkhd3    | 3.760218   | 0.35 | 9.2%   |
| Rlbp1    | 0.2514032  | 0.08 | 33.2%  |
| Rlbp1l1  | 17.5889    | 0.25 | 1.4%   |
| Rlbp1l2  | 3.509466   | 0.47 | 13.3%  |
| Rlf      | 7.927652   | 0.52 | 6.6%   |
| Rln1     | 0.1308926  | 0.07 | 54.6%  |
| Rln3     | 0          | 0.00 |        |
| Rmi1     | 4.399862   | 0.35 | 7.9%   |
| Rmnd1    | 2.13389    | 0.14 | 6.7%   |
| Rmnd5a   | 35.72      | 3.45 | 9.6%   |
| Rmnd5b   | 9.231708   | 0.83 | 9.0%   |
| Rn3      | 0.17168782 | 0.08 | 47.7%  |
| Rnase1   | 0.1730162  | 0.05 | 29.5%  |
| Rnase10  | 0.01261966 | 0.01 | 93.8%  |
| Rnase11  | 0          | 0.00 |        |
| Rnase12  | 0          | 0.00 |        |
| Rnase13  | 0          | 0.00 |        |
| Rnase4   | 1.3804234  | 0.65 | 47.2%  |
| Rnase6   | 0          | 0.00 |        |
| Rnase9   | 0          | 0.00 |        |
| Rnaseh1  | 2.66811    | 0.28 | 10.4%  |
| Rnaseh2a | 5.152996   | 0.11 | 2.1%   |
| Rnaseh2b | 2.916632   | 0.37 | 12.7%  |
| Rnaseh2c | 11.223122  | 1.54 | 13.7%  |
| RnaseI   | 0.5811472  | 0.07 | 12.0%  |
| RnaseN   | 29.8085    | 0.41 | 1.4%   |
| Rnaset2  | 0.12202432 | 0.06 | 45.8%  |
| Rnaset2a | 3.897546   | 0.57 | 14.5%  |
| Rnaset2b | 1.092326   | 0.44 | 40.7%  |
| Rnd1     | 7.9672     | 0.31 | 3.9%   |
| Rnd2     | 43.77942   | 3.11 | 7.1%   |



|          |            |       |        |
|----------|------------|-------|--------|
| Rnd3     | 12.15424   | 0.43  | 3.6%   |
| Rnf10    | 59.13312   | 3.67  | 6.2%   |
| Rnf103   | 18.72692   | 0.77  | 4.1%   |
| Rnf11    | 81.28078   | 3.01  | 3.7%   |
| Rnf111   | 8.120052   | 0.25  | 3.0%   |
| Rnf113a1 | 3.804776   | 0.69  | 18.2%  |
| Rnf113a2 | 5.009428   | 0.35  | 7.1%   |
| Rnf12    | 16.60422   | 0.87  | 5.2%   |
| Rnf121   | 9.344798   | 0.82  | 8.8%   |
| Rnf122   | 1.0103918  | 0.11  | 10.8%  |
| Rnf123   | 7.315358   | 1.00  | 13.6%  |
| Rnf125   | 0.08041226 | 0.06  | 75.0%  |
| Rnf126   | 17.77826   | 0.78  | 4.4%   |
| Rnf128   | 9.154518   | 0.59  | 6.4%   |
| Rnf13    | 27.81612   | 1.58  | 5.7%   |
| Rnf130   | 21.2218    | 1.38  | 6.5%   |
| Rnf133   | 0          | 0.00  |        |
| Rnf135   | 0.2157508  | 0.05  | 21.1%  |
| Rnf138   | 6.097076   | 0.69  | 11.3%  |
| Rnf139   | 15.65382   | 0.86  | 5.5%   |
| Rnf14    | 149.0016   | 6.30  | 4.2%   |
| Rnf141   | 1.826952   | 0.46  | 24.9%  |
| Rnf144a  | 6.467812   | 0.49  | 7.6%   |
| Rnf144b  | 0.666073   | 0.13  | 19.4%  |
| Rnf145   | 28.78126   | 3.76  | 13.1%  |
| Rnf146   | 23.031     | 1.47  | 6.4%   |
| Rnf148   | 0.0050388  | 0.01  | 223.6% |
| Rnf149   | 9.060512   | 0.81  | 8.9%   |
| Rnf150   | 3.419002   | 0.32  | 9.3%   |
| Rnf151   | 0.0414141  | 0.03  | 82.8%  |
| Rnf152   | 12.35366   | 1.16  | 9.4%   |
| Rnf157   | 91.502     | 4.93  | 5.4%   |
| Rnf166   | 5.551192   | 0.48  | 8.7%   |
| Rnf167   | 25.35994   | 0.50  | 2.0%   |
| Rnf168   | 7.86464    | 0.27  | 3.4%   |
| Rnf17    | 0.4192648  | 0.09  | 22.5%  |
| Rnf170   | 4.815216   | 0.35  | 7.2%   |
| Rnf180   | 3.938204   | 0.18  | 4.7%   |
| Rnf181   | 26.64512   | 1.36  | 5.1%   |
| Rnf182   | 1.51365    | 0.22  | 14.5%  |
| Rnf183   | 0.05246118 | 0.04  | 84.0%  |
| Rnf185   | 11.73732   | 0.49  | 4.1%   |
| Rnf186   | 0          | 0.00  |        |
| Rnf187   | 176.4288   | 13.57 | 7.7%   |
| Rnf19    | 0.4863396  | 0.15  | 31.7%  |
| Rnf190   | 0.0902302  | 0.04  | 43.8%  |
| Rnf19a   | 11.53182   | 0.54  | 4.7%   |

|         |             |      |       |
|---------|-------------|------|-------|
| Rnf19b  | 4.12304     | 0.62 | 15.0% |
| Rnf2    | 15.14614    | 1.83 | 12.1% |
| Rnf20   | 12.24116    | 0.69 | 5.6%  |
| Rnf207  | 1.30811     | 0.16 | 12.4% |
| Rnf213  | 0.5026058   | 0.09 | 17.2% |
| Rnf214  | 21.86028    | 1.24 | 5.7%  |
| Rnf215  | 7.089604    | 0.10 | 1.4%  |
| Rnf216  | 8.408736    | 0.77 | 9.2%  |
| Rnf24   | 8.183888    | 0.40 | 4.9%  |
| Rnf25   | 19.48902    | 1.12 | 5.8%  |
| Rnf26   | 2.88717     | 0.13 | 4.6%  |
| Rnf31   | 6.063274    | 0.45 | 7.4%  |
| Rnf32   | 2.469996    | 0.31 | 12.6% |
| Rnf34   | 17.80648    | 0.70 | 3.9%  |
| Rnf38   | 10.50226    | 0.11 | 1.1%  |
| Rnf39   | 0.3352968   | 0.10 | 29.7% |
| Rnf4    | 33.36224    | 1.71 | 5.1%  |
| Rnf40   | 9.378182    | 0.23 | 2.5%  |
| Rnf41   | 21.60348    | 1.39 | 6.4%  |
| Rnf43   | 0.15878082  | 0.11 | 70.6% |
| Rnf44   | 20.89072    | 0.83 | 4.0%  |
| Rnf5    | 19.96382    | 2.04 | 10.2% |
| Rnf6    | 13.0531     | 0.87 | 6.7%  |
| Rnf7    | 25.61314    | 0.82 | 3.2%  |
| Rnf8    | 8.369926    | 0.24 | 2.9%  |
| Rngtt   | 6.304148    | 0.36 | 5.7%  |
| Rnh1    | 6.035144    | 0.68 | 11.2% |
| Rnmt    | 18.6098     | 0.57 | 3.1%  |
| Rnmtd2  | 0.02568728  | 0.02 | 95.1% |
| Rnmtl1  | 6.172648    | 0.29 | 4.7%  |
| Rnpc3   | 13.95438    | 2.24 | 16.0% |
| Rnpep   | 8.233324    | 0.10 | 1.2%  |
| Rnpepl1 | 6.041768    | 0.37 | 6.2%  |
| Rnps1   | 8.242526    | 0.38 | 4.6%  |
| Rnuxa   | 18.36986    | 1.86 | 10.1% |
| Robo1   | 9.3488      | 0.26 | 2.8%  |
| Robo2   | 19.9738     | 0.93 | 4.6%  |
| Robo4   | 0.009710002 | 0.01 | 73.3% |
| Rock1   | 2.27638     | 0.15 | 6.6%  |
| Rock2   | 10.070706   | 0.57 | 5.6%  |
| Rod1    | 3.202546    | 0.49 | 15.2% |
| Rogdi   | 40.6897     | 1.11 | 2.7%  |
| Rom1    | 1.4877668   | 0.38 | 25.6% |
| Ropn1   | 0           | 0.00 |       |
| Ropn1l  | 0.338974    | 0.11 | 33.0% |
| Ror1    | 0.5720922   | 0.11 | 18.8% |
| Ror2    | 1.991984    | 0.34 | 17.2% |

|                   |             |      |        |
|-------------------|-------------|------|--------|
| Rora              | 3.77553     | 1.24 | 32.8%  |
| Rorb              | 0.9118962   | 0.08 | 8.3%   |
| RORb              | 0.2343432   | 0.18 | 78.5%  |
| Rorc              | 0.522642292 | 0.33 | 63.1%  |
| Ros1              | 0.005021546 | 0.01 | 105.1% |
| Rp1               | 0           | 0.00 |        |
| Rp1h              | 0           | 0.00 |        |
| Rp1l1             | 0.001915984 | 0.00 | 223.6% |
| Rp2               | 0.14843302  | 0.10 | 69.3%  |
| RP23-117C5.5-001  | 0.00470784  | 0.01 | 223.6% |
| RP23-121P11.3     | 0.08370722  | 0.06 | 70.6%  |
| RP23-153N12.1     | 2.149196    | 0.09 | 4.1%   |
| RP23-180B18.4     | 0.4800964   | 0.28 | 59.1%  |
| RP23-188H3.7      | 0.022157908 | 0.02 | 69.4%  |
| RP23-198E14.4     | 0.3328248   | 0.17 | 52.2%  |
| RP23-257P7.3      | 1.371274    | 0.27 | 20.0%  |
| RP23-286B12.2-001 | 0.282541    | 0.11 | 37.4%  |
| RP23-292E3.5-003  | 0.5253138   | 0.17 | 32.3%  |
| Rp23-297j14.5     | 0.8507464   | 0.13 | 15.0%  |
| RP23-311O20.2-001 | 0.1454117   | 0.05 | 37.6%  |
| RP23-327G1.2      | 2.488606    | 0.38 | 15.4%  |
| Rp23-357i14.1     | 0.06091862  | 0.04 | 61.0%  |
| RP23-382C18.2     | 0.329812    | 0.08 | 24.0%  |
| RP23-391K14.2-001 | 1.479592    | 0.22 | 14.9%  |
| Rp23-423l11.5     | 0           | 0.00 |        |
| Rp23-438h3.2      | 0           | 0.00 |        |
| RP23-451A6.3      | 0.004654112 | 0.01 | 150.2% |
| RP23-453B22.3     | 2.123078    | 0.30 | 14.1%  |
| Rp23-45p4.1       | 0.008608486 | 0.00 | 40.3%  |
| RP23-467J12.2-001 | 8.865114    | 0.39 | 4.4%   |
| RP23-81E16.2-005  | 3.152078    | 0.31 | 9.8%   |
| RP23-92B18.7      | 0.04638886  | 0.03 | 71.0%  |
| Rp2h              | 4.25709     | 0.34 | 7.9%   |
| rp9               | 13.20234    | 0.56 | 4.2%   |
| Rpa1              | 9.834364    | 0.58 | 5.9%   |
| Rpa2              | 3.77237     | 0.27 | 7.0%   |
| Rpa3              | 2.313984    | 0.38 | 16.3%  |
| Rpain             | 3.639276    | 0.41 | 11.2%  |
| Rpap1             | 4.210604    | 0.12 | 2.9%   |
| Rpap2             | 8.90869     | 4.20 | 47.1%  |
| Rpap3             | 7.67177     | 0.35 | 4.6%   |
| Rpe               | 8.16496     | 1.22 | 14.9%  |
| Rpe65             | 0.00357382  | 0.01 | 223.6% |
| Rpgr              | 5.425292    | 0.64 | 11.7%  |
| Rpgrip1           | 2.067536    | 0.60 | 28.8%  |
| Rpgrip1l          | 4.782048    | 0.26 | 5.5%   |
| Rph3a             | 15.45678    | 2.26 | 14.6%  |

|         |            |       |        |
|---------|------------|-------|--------|
| Rph3al  | 0.22001076 | 0.11  | 52.0%  |
| Rpia    | 3.563694   | 0.07  | 2.1%   |
| Rpl10   | 1.38592    | 0.27  | 19.5%  |
| Rpl10a  | 5.620914   | 1.21  | 21.5%  |
| Rpl11   | 2.171062   | 0.41  | 18.8%  |
| Rpl12   | 0.7938776  | 0.14  | 17.2%  |
| Rpl13   | 3.881688   | 0.27  | 7.1%   |
| Rpl13a  | 34.83064   | 3.05  | 8.7%   |
| Rpl14   | 19.09304   | 2.53  | 13.2%  |
| Rpl15   | 53.41992   | 5.08  | 9.5%   |
| Rpl17   | 0.440181   | 0.09  | 21.4%  |
| Rpl18   | 5.392466   | 0.33  | 6.0%   |
| Rpl18a  | 7.180916   | 0.55  | 7.6%   |
| Rpl19   | 0.750669   | 0.08  | 10.0%  |
| Rpl21   | 2.39021    | 0.25  | 10.4%  |
| Rpl22   | 24.3227    | 1.57  | 6.5%   |
| Rpl22l1 | 23.00112   | 1.68  | 7.3%   |
| Rpl23   | 5.976512   | 0.40  | 6.7%   |
| Rpl23a  | 0.3324278  | 0.09  | 26.6%  |
| Rpl24   | 0.6365668  | 0.15  | 23.4%  |
| Rpl26   | 9.602684   | 0.70  | 7.3%   |
| Rpl27   | 0.07830254 | 0.09  | 115.2% |
| Rpl27a  | 14.33054   | 0.91  | 6.3%   |
| Rpl28   | 0.378612   | 0.16  | 42.1%  |
| Rpl29   | 1.470726   | 0.17  | 11.6%  |
| Rpl3    | 0.2558278  | 0.04  | 13.7%  |
| Rpl30   | 2.573766   | 0.69  | 26.7%  |
| Rpl31   | 2.338282   | 0.43  | 18.4%  |
| Rpl32   | 43.00372   | 5.21  | 12.1%  |
| Rpl34   | 1.703582   | 0.33  | 19.2%  |
| Rpl35   | 2.906288   | 1.18  | 40.6%  |
| Rpl35a  | 4.303124   | 0.40  | 9.2%   |
| Rpl36   | 0.9422096  | 0.37  | 38.8%  |
| Rpl36a  | 0.2538348  | 0.08  | 32.0%  |
| Rpl36al | 16.31218   | 1.97  | 12.1%  |
| Rpl37   | 5.498752   | 0.60  | 11.0%  |
| Rpl37a  | 6.992364   | 2.87  | 41.1%  |
| Rpl38   | 4.98122    | 0.70  | 14.1%  |
| Rpl39   | 26.68136   | 3.30  | 12.4%  |
| Rpl39l  | 0          | 0.00  |        |
| Rpl3l   | 0.19937882 | 0.10  | 51.4%  |
| Rpl4    | 121.583    | 9.09  | 7.5%   |
| Rpl41   | 56.1053    | 10.75 | 19.2%  |
| Rpl5    | 1.795688   | 0.19  | 10.4%  |
| Rpl6    | 12.04526   | 1.01  | 8.3%   |
| Rpl7    | 24.66364   | 2.13  | 8.6%   |
| Rpl7a   | 13.56926   | 0.69  | 5.1%   |

|          |            |       |        |
|----------|------------|-------|--------|
| Rpl7l1   | 9.575096   | 0.34  | 3.6%   |
| Rpl8     | 208.6176   | 17.40 | 8.3%   |
| Rpl9     | 1.368376   | 0.30  | 21.8%  |
| Rplp1    | 85.22996   | 3.92  | 4.6%   |
| Rplp2    | 11.23733   | 1.54  | 13.7%  |
| Rpn1     | 28.9838    | 1.62  | 5.6%   |
| Rpn2     | 43.70748   | 1.57  | 3.6%   |
| Rpo1-1   | 13.067     | 0.92  | 7.0%   |
| Rpo1-2   | 2.951858   | 0.08  | 2.7%   |
| Rpo1-3   | 13.22054   | 2.14  | 16.2%  |
| Rpo1-4   | 7.030008   | 0.41  | 5.8%   |
| Rpp14    | 10.61492   | 0.14  | 1.3%   |
| Rpp21    | 10.21589   | 0.99  | 9.7%   |
| Rpp25    | 1.900946   | 0.25  | 12.9%  |
| Rpp30    | 12.45834   | 0.69  | 5.5%   |
| Rpp38    | 2.789376   | 0.39  | 14.0%  |
| Rpp40    | 0.9466382  | 0.13  | 13.4%  |
| Rprm     | 9.53467    | 0.67  | 7.0%   |
| Rprml    | 0.1965788  | 0.03  | 15.9%  |
| Rps10    | 2.269166   | 0.43  | 19.1%  |
| Rps11    | 57.86294   | 6.34  | 11.0%  |
| Rps12    | 1.881844   | 0.13  | 7.1%   |
| Rps13    | 0.2486716  | 0.04  | 14.8%  |
| Rps14    | 38.76626   | 4.35  | 11.2%  |
| Rps15    | 92.92412   | 6.54  | 7.0%   |
| Rps15a   | 15.0258    | 0.53  | 3.6%   |
| Rps16    | 13.71908   | 1.16  | 8.4%   |
| Rps17    | 10.372928  | 0.72  | 7.0%   |
| Rps18    | 2.971298   | 0.46  | 15.4%  |
| Rps19    | 12.72494   | 1.39  | 10.9%  |
| Rps19bp1 | 14.65758   | 1.98  | 13.5%  |
| Rps2     | 17.53584   | 2.94  | 16.7%  |
| Rps20    | 40.29178   | 3.72  | 9.2%   |
| Rps21    | 33.22484   | 2.54  | 7.6%   |
| Rps23    | 0.0683421  | 0.07  | 96.8%  |
| Rps24    | 8.74026    | 0.35  | 4.0%   |
| Rps25    | 13.18066   | 1.42  | 10.8%  |
| Rps26    | 22.96854   | 2.89  | 12.6%  |
| Rps27    | 0.09117666 | 0.09  | 104.1% |
| Rps27a   | 0.937313   | 0.29  | 31.3%  |
| Rps27l   | 8.372212   | 0.31  | 3.7%   |
| Rps28    | 0.3723872  | 0.07  | 18.2%  |
| Rps29    | 0.16770834 | 0.08  | 49.2%  |
| Rps3     | 70.24064   | 4.86  | 6.9%   |
| Rps3a    | 0.475751   | 0.17  | 35.9%  |
| Rps4x    | 44.5026    | 2.79  | 6.3%   |
| Rps5     | 147.5458   | 11.78 | 8.0%   |

|         |            |      |        |
|---------|------------|------|--------|
| Rps6    | 1.4652448  | 0.31 | 21.1%  |
| Rps6ka1 | 5.602042   | 0.48 | 8.5%   |
| Rps6ka2 | 5.00852    | 0.39 | 7.7%   |
| Rps6ka3 | 9.142708   | 1.00 | 11.0%  |
| Rps6ka4 | 9.272914   | 0.65 | 7.0%   |
| Rps6ka5 | 3.594976   | 0.71 | 19.7%  |
| Rps6ka6 | 12.07652   | 1.31 | 10.9%  |
| Rps6kb1 | 0.9479772  | 0.21 | 22.3%  |
| Rps6kb2 | 7.384294   | 0.51 | 6.9%   |
| Rps6kc1 | 12.26832   | 0.39 | 3.2%   |
| Rps6kl1 | 9.18753    | 0.53 | 5.8%   |
| Rps7    | 0.7685364  | 0.21 | 27.1%  |
| Rps9    | 78.51268   | 8.93 | 11.4%  |
| Rpsa    | 17.78746   | 1.78 | 10.0%  |
| Rptn    | 0          | 0.00 |        |
| Rpusd1  | 6.834764   | 0.60 | 8.8%   |
| Rpusd2  | 1.26133    | 0.05 | 3.8%   |
| Rpusd3  | 1.818764   | 0.21 | 11.3%  |
| Rpusd4  | 3.184694   | 0.10 | 3.1%   |
| Rqcd1   | 11.29388   | 0.59 | 5.2%   |
| Rrad    | 0.257237   | 0.08 | 33.0%  |
| Rraga   | 61.10846   | 5.06 | 8.3%   |
| Rragb   | 66.9926    | 1.13 | 1.7%   |
| Rragc   | 29.05956   | 1.60 | 5.5%   |
| Rragd   | 15.80606   | 0.66 | 4.2%   |
| Rras    | 2.05442    | 0.31 | 15.1%  |
| Rras2   | 3.356142   | 0.44 | 13.2%  |
| Rrbp1   | 13.569     | 2.66 | 19.6%  |
| Rreb1   | 1.597648   | 0.13 | 8.3%   |
| Rrh     | 0.00532474 | 0.01 | 223.6% |
| Rrm1    | 7.359186   | 0.53 | 7.2%   |
| Rrm2    | 2.43595    | 0.21 | 8.6%   |
| Rrm2b   | 6.126774   | 0.15 | 2.4%   |
| Rrn3    | 21.91762   | 0.79 | 3.6%   |
| Rrp1    | 101.5556   | 3.83 | 3.8%   |
| Rrp12   | 12.2999    | 0.97 | 7.9%   |
| Rrp15   | 2.738152   | 0.16 | 6.0%   |
| Rrp1b   | 2.662736   | 0.25 | 9.3%   |
| Rrp9    | 6.768102   | 0.77 | 11.4%  |
| Rrs1    | 7.51046    | 0.64 | 8.5%   |
| Rs1     | 0.0035701  | 0.01 | 223.6% |
| Rsad1   | 1.798484   | 0.08 | 4.4%   |
| Rsad2   | 0.07447086 | 0.03 | 34.6%  |
| Rsb1    | 7.738332   | 0.36 | 4.7%   |
| Rsb1l   | 3.782824   | 0.26 | 6.9%   |
| Rsf1    | 5.461636   | 0.53 | 9.7%   |
| Rsh1    | 0.01984022 | 0.01 | 36.6%  |

|         |            |       |        |
|---------|------------|-------|--------|
| Rshl2a  | 3.29308    | 0.19  | 5.7%   |
| Rshl2b  | 2.882022   | 0.31  | 10.7%  |
| Rshl3   | 0.3142932  | 0.04  | 11.7%  |
| rsk3    | 0.04666334 | 0.03  | 71.0%  |
| Rsl1    | 0.6899732  | 0.13  | 18.7%  |
| Rsl1d1  | 23.51344   | 0.81  | 3.4%   |
| Rsph1   | 0.366006   | 0.05  | 14.6%  |
| Rspo1   | 3.227246   | 0.42  | 12.9%  |
| Rspo2   | 1.834858   | 0.26  | 14.2%  |
| Rspo3   | 2.023596   | 0.12  | 6.2%   |
| Rspo4   | 0.00627902 | 0.01  | 138.6% |
| Rspry1  | 12.01756   | 0.45  | 3.7%   |
| Rsrc1   | 12.76824   | 0.63  | 5.0%   |
| Rsrc2   | 20.13216   | 0.50  | 2.5%   |
| Rsu1    | 14.0716    | 1.34  | 9.5%   |
| Rtbdn   | 1.826858   | 0.16  | 8.6%   |
| Rtbnd   | 0.23761556 | 0.10  | 43.4%  |
| Rtcd1   | 28.56368   | 0.98  | 3.4%   |
| Rtdr1   | 0          | 0.00  |        |
| Rtel1   | 5.147808   | 0.26  | 5.1%   |
| Rtkn    | 3.034246   | 0.36  | 11.8%  |
| Rtl1    | 2.16664    | 0.21  | 9.5%   |
| Rtn1    | 615.747    | 31.42 | 5.1%   |
| Rtn-1A  | 1.8109414  | 1.44  | 79.7%  |
| Rtn2    | 32.8648    | 3.37  | 10.3%  |
| Rtn3    | 864.7276   | 16.50 | 1.9%   |
| Rtn4    | 172.0262   | 7.54  | 4.4%   |
| Rtn4ip1 | 6.045124   | 0.40  | 6.6%   |
| Rtn4r   | 8.597824   | 1.19  | 13.8%  |
| Rtn4rl1 | 1.58647    | 0.12  | 7.5%   |
| Rtn4rl2 | 1.1423066  | 0.24  | 21.4%  |
| Rtp1    | 0.00824104 | 0.01  | 94.5%  |
| Rtp2    | 0.00536164 | 0.01  | 137.3% |
| Rtp3    | 0.00281244 | 0.01  | 223.6% |
| Rtp4    | 0.14186612 | 0.10  | 68.6%  |
| Rttn    | 0.5584908  | 0.05  | 8.4%   |
| Rufy1   | 6.565074   | 0.53  | 8.0%   |
| Rufy2   | 13.1087    | 0.95  | 7.2%   |
| Rufy3   | 64.48826   | 3.01  | 4.7%   |
| Rufy4   | 0.05138164 | 0.02  | 42.4%  |
| Rundc1  | 6.905836   | 0.40  | 5.8%   |
| Rundc3a | 62.63092   | 1.62  | 2.6%   |
| Rundc3b | 18.62344   | 1.22  | 6.5%   |
| Runx1   | 0.642523   | 0.10  | 15.8%  |
| Runx1t1 | 9.280292   | 0.89  | 9.6%   |
| Runx2   | 0.1971272  | 0.05  | 25.7%  |
| Runx3   | 2.004024   | 0.09  | 4.7%   |

|          |            |      |        |
|----------|------------|------|--------|
| Rusc1    | 56.36092   | 3.29 | 5.8%   |
| Rusc2    | 22.59138   | 1.01 | 4.5%   |
| Rutbc2   | 1.3243072  | 0.39 | 29.4%  |
| Ruvbl1   | 2.456244   | 0.27 | 11.0%  |
| Ruvbl2   | 13.31046   | 0.56 | 4.2%   |
| Rwdd1    | 4.264558   | 0.36 | 8.5%   |
| Rwdd2a   | 36.01742   | 2.22 | 6.2%   |
| Rwdd2b   | 3.56061    | 0.27 | 7.6%   |
| Rwdd3    | 1.584216   | 0.36 | 22.9%  |
| Rwdd4a   | 9.515878   | 0.25 | 2.6%   |
| Rxftp1   | 0.4695614  | 0.17 | 35.9%  |
| Rxftp2   | 0.02899676 | 0.01 | 51.6%  |
| Rxftp3   | 0.5665222  | 0.09 | 16.0%  |
| Rxftp4   | 0          | 0.00 |        |
| Rxra     | 5.757922   | 0.53 | 9.3%   |
| Rxrb     | 15.19032   | 0.58 | 3.8%   |
| Rxrg     | 0.5814602  | 0.04 | 6.6%   |
| Rxrip110 | 0.2850394  | 0.06 | 20.6%  |
| Rya3     | 0          | 0.00 |        |
| Rybp     | 4.989346   | 0.48 | 9.7%   |
| Ryk      | 4.959342   | 0.42 | 8.5%   |
| Ryr1     | 0.1403334  | 0.03 | 19.9%  |
| Ryr2     | 5.260402   | 0.47 | 9.0%   |
| Ryr3     | 1.596988   | 0.16 | 10.2%  |
| Rzf      | 0.703119   | 0.14 | 19.2%  |
| S100a1   | 1.21646    | 0.06 | 5.3%   |
| S100a10  | 6.688618   | 1.24 | 18.6%  |
| S100a11  | 2.648594   | 0.43 | 16.4%  |
| S100a13  | 1.381886   | 0.13 | 9.4%   |
| S100a14  | 0          | 0.00 |        |
| S100a16  | 2.919854   | 0.38 | 13.0%  |
| S100a3   | 0          | 0.00 |        |
| S100a4   | 0.5102704  | 0.26 | 50.6%  |
| S100a5   | 0          | 0.00 |        |
| S100a6   | 5.02757    | 1.06 | 21.0%  |
| S100a7a  | 0          | 0.00 |        |
| S100a8   | 0          | 0.00 |        |
| S100a9   | 0          | 0.00 |        |
| S100b    | 2.535624   | 0.46 | 18.3%  |
| S100g    | 9.006342   | 4.77 | 52.9%  |
| S100pbp  | 11.40052   | 0.27 | 2.4%   |
| S100z    | 0          | 0.00 |        |
| s11-6    | 0.3803872  | 0.18 | 46.7%  |
| S3-12    | 0.0319819  | 0.01 | 33.8%  |
| S60130   | 0          | 0.00 |        |
| S60135   | 0.0520818  | 0.12 | 223.6% |
| S81934   | 0          | 0.00 |        |



|         |             |      |        |
|---------|-------------|------|--------|
| S90647  | 0           | 0.00 |        |
| S94460  | 0           | 0.00 |        |
| Saa1    | 0.0265879   | 0.03 | 94.4%  |
| Saa2    | 0           | 0.00 |        |
| Saa3    | 1.850926    | 0.39 | 21.1%  |
| Saa4    | 0           | 0.00 |        |
| Saal1   | 2.182134    | 0.14 | 6.5%   |
| Sac3d1  | 8.734512    | 0.48 | 5.5%   |
| Sacm1l  | 35.41882    | 1.21 | 3.4%   |
| Sacs    | 3.769044    | 0.64 | 17.0%  |
| Sacy    | 0.01198468  | 0.01 | 69.2%  |
| Sae1    | 47.40476    | 2.80 | 5.9%   |
| Sae2    | 28.10592    | 1.13 | 4.0%   |
| Safb2   | 9.985714    | 0.46 | 4.6%   |
| Sag     | 0.01721386  | 0.02 | 92.2%  |
| Sall1   | 1.28293     | 0.10 | 8.1%   |
| Sall2   | 19.1795     | 0.63 | 3.3%   |
| Sall3   | 1.03017     | 0.10 | 10.1%  |
| Sall4   | 0.179882    | 0.04 | 23.1%  |
| SAM11   | 4.493098    | 0.85 | 18.8%  |
| Samd1   | 5.478518    | 0.44 | 8.1%   |
| Samd10  | 23.4882     | 3.14 | 13.4%  |
| Samd12  | 11.21764    | 1.13 | 10.1%  |
| Samd14  | 33.96732    | 3.29 | 9.7%   |
| Samd4   | 5.015766    | 0.49 | 9.7%   |
| Samd4b  | 10.5197     | 0.20 | 1.9%   |
| Samd5   | 2.881474    | 0.50 | 17.5%  |
| Samd7   | 0.013989884 | 0.01 | 103.4% |
| Samd8   | 21.8994     | 0.92 | 4.2%   |
| Samd9l  | 0.3352366   | 0.06 | 18.7%  |
| Samhd1  | 4.435424    | 0.47 | 10.6%  |
| Samm50  | 45.83072    | 1.45 | 3.2%   |
| Samsn1  | 0.00951706  | 0.01 | 93.8%  |
| Sap130  | 14.28716    | 0.75 | 5.3%   |
| Sap18   | 8.04825     | 0.47 | 5.8%   |
| SAP2    | 1.3120948   | 0.29 | 22.1%  |
| Sap25   | 0.5308274   | 0.18 | 33.1%  |
| Sap30   | 1.69267     | 0.15 | 8.8%   |
| Sap30bp | 10.52182    | 0.40 | 3.8%   |
| Sap30l  | 8.75999     | 0.55 | 6.3%   |
| Sapap2  | 0.08411506  | 0.01 | 15.6%  |
| Saps1   | 31.3693     | 0.66 | 2.1%   |
| Saps2   | 24.31128    | 0.89 | 3.7%   |
| Saps3   | 19.72058    | 0.91 | 4.6%   |
| Sar1a   | 52.49034    | 1.65 | 3.1%   |
| Sar1b   | 32.5834     | 3.76 | 11.5%  |
| Sardh   | 0.8538144   | 0.14 | 16.4%  |

|        |            |       |        |
|--------|------------|-------|--------|
| Sarm1  | 5.275458   | 0.69  | 13.2%  |
| Sars   | 110.1176   | 5.80  | 5.3%   |
| Sars2  | 4.650418   | 0.47  | 10.1%  |
| Sart1  | 12.41716   | 0.52  | 4.2%   |
| Sart3  | 7.2843     | 0.24  | 3.3%   |
| Sash1  | 3.436036   | 0.21  | 6.1%   |
| SASH1  | 0.04046452 | 0.01  | 25.3%  |
| Sass6  | 2.07655    | 0.20  | 9.6%   |
| Sat1   | 7.38796    | 0.48  | 6.5%   |
| Sat2   | 2.817312   | 0.44  | 15.5%  |
| Satb1  | 6.802648   | 0.46  | 6.8%   |
| Satb2  | 0.3236708  | 0.07  | 21.0%  |
| Satl1  | 0.00523922 | 0.01  | 223.6% |
| Sav1   | 4.893236   | 0.41  | 8.5%   |
| Sb1    | 0.5843302  | 0.08  | 13.9%  |
| Sbds   | 11.77406   | 0.61  | 5.2%   |
| Sbf1   | 25.70952   | 1.01  | 3.9%   |
| Sbf2   | 10.263798  | 1.07  | 10.4%  |
| Sbk1   | 25.41102   | 3.62  | 14.3%  |
| Sbno1  | 20.64076   | 1.13  | 5.5%   |
| Sbno2  | 2.536878   | 0.54  | 21.3%  |
| Sbp    | 0          | 0.00  |        |
| Sbpl   | 0.00802564 | 0.02  | 223.6% |
| Sbsn   | 3.380406   | 0.18  | 5.3%   |
| Sc4mol | 78.53948   | 8.29  | 10.6%  |
| Sc5d   | 33.76192   | 1.02  | 3.0%   |
| Scaf1  | 34.48246   | 1.47  | 4.3%   |
| Scamp1 | 91.38928   | 1.25  | 1.4%   |
| Scamp2 | 4.392658   | 0.35  | 7.9%   |
| Scamp3 | 37.45006   | 2.46  | 6.6%   |
| Scamp4 | 11.8911    | 1.03  | 8.7%   |
| Scamp5 | 94.34392   | 3.83  | 4.1%   |
| Scand1 | 7.909762   | 1.51  | 19.1%  |
| Scap   | 16.20284   | 0.98  | 6.1%   |
| Scaper | 9.275526   | 0.80  | 8.6%   |
| Scara3 | 0.12140112 | 0.03  | 26.8%  |
| Scara5 | 0.414641   | 0.14  | 33.7%  |
| Scarb1 | 9.179324   | 1.14  | 12.4%  |
| Scarb2 | 34.0998    | 1.65  | 4.8%   |
| Scarf1 | 0.04961766 | 0.02  | 49.5%  |
| Scarf2 | 1.3412452  | 0.57  | 42.2%  |
| Sccpdh | 51.7943    | 1.92  | 3.7%   |
| Scd1   | 45.4453    | 4.50  | 9.9%   |
| Scd2   | 452.876    | 31.67 | 7.0%   |
| Scd3   | 0.3045246  | 0.02  | 5.0%   |
| Scd4   | 1.754982   | 0.19  | 10.9%  |
| Scel   | 0.09268536 | 0.03  | 37.5%  |

|             |             |      |        |
|-------------|-------------|------|--------|
| Scfd1       | 18.37216    | 1.74 | 9.5%   |
| Scfd2       | 3.766838    | 0.19 | 5.2%   |
| Scg2        | 84.934      | 3.65 | 4.3%   |
| Scg3        | 50.95674    | 3.24 | 6.4%   |
| Scg5        | 98.99942    | 3.95 | 4.0%   |
| Scgb1a1     | 0           | 0.00 |        |
| Scgb1c1     | 0           | 0.00 |        |
| Scgb3a1     | 0.038028    | 0.09 | 223.6% |
| Scgb3a2     | 0           | 0.00 |        |
| Scgn        | 0.4710396   | 0.07 | 14.1%  |
| Schip1      | 38.95082    | 2.19 | 5.6%   |
| Scin        | 0.00888088  | 0.01 | 92.6%  |
| Sclt1       | 2.062344    | 0.39 | 18.7%  |
| Scly        | 6.961942    | 0.59 | 8.5%   |
| Scmh1       | 9.502652    | 0.46 | 4.8%   |
| scmh1       | 3.142396    | 0.49 | 15.5%  |
| Scml2       | 0.3047802   | 0.05 | 16.1%  |
| Scml4       | 1.1254752   | 0.19 | 16.6%  |
| Scn10a      | 0.005953226 | 0.00 | 62.9%  |
| Scn11a      | 0.004344158 | 0.01 | 157.2% |
| Scn1a       | 29.7139     | 3.05 | 10.3%  |
| Scn1b       | 86.58392    | 4.03 | 4.7%   |
| Scn2a1      | 24.8485     | 1.71 | 6.9%   |
| Scn2b       | 60.75688    | 6.44 | 10.6%  |
| Scn3a       | 10.857716   | 1.40 | 12.9%  |
| Scn3b       | 36.61484    | 3.26 | 8.9%   |
| Scn4a       | 0.004225342 | 0.01 | 138.7% |
| Scn4b       | 8.032002    | 1.79 | 22.2%  |
| Scn5a       | 0.1748108   | 0.01 | 4.6%   |
| Scn7a       | 0.5266142   | 0.06 | 12.2%  |
| Scn8a       | 33.37398    | 2.61 | 7.8%   |
| Scn9a       | 0.8115278   | 0.06 | 7.6%   |
| Scnm1       | 8.063686    | 0.43 | 5.4%   |
| Scnn1a      | 0.2037402   | 0.06 | 27.1%  |
| Scnn1b      | 0.00228912  | 0.01 | 223.6% |
| Scnn1g      | 0.0026015   | 0.01 | 223.6% |
| Sco1        | 2.698754    | 0.27 | 10.0%  |
| Scoc        | 35.96666    | 1.36 | 3.8%   |
| sco-spondin | 0.019034534 | 0.01 | 58.7%  |
| Scotin      | 20.4404     | 0.88 | 4.3%   |
| Scp2        | 10.020678   | 0.64 | 6.4%   |
| Scpep1      | 20.38408    | 0.83 | 4.1%   |
| Scrg1       | 0.606254    | 0.17 | 28.4%  |
| Scrib       | 10.51088    | 0.29 | 2.7%   |
| Scrn1       | 73.32678    | 1.98 | 2.7%   |
| Scrn2       | 0.7134088   | 0.12 | 16.6%  |
| Scrn3       | 10.007374   | 0.53 | 5.3%   |



|          |             |      |        |
|----------|-------------|------|--------|
| Sec15l2  | 0.6221382   | 0.43 | 69.0%  |
| Sec16a   | 10.72874    | 0.37 | 3.5%   |
| Sec16b   | 0.0913422   | 0.03 | 38.3%  |
| Sec20    | 0.556904    | 0.11 | 19.4%  |
| Sec22a   | 3.529302    | 0.19 | 5.4%   |
| Sec22b   | 29.31866    | 0.45 | 1.5%   |
| Sec22c   | 6.099106    | 0.63 | 10.3%  |
| Sec23a   | 41.54462    | 1.13 | 2.7%   |
| Sec23b   | 13.0937     | 0.38 | 2.9%   |
| Sec23ip  | 16.88248    | 1.14 | 6.7%   |
| Sec24a   | 7.122506    | 0.48 | 6.8%   |
| Sec24b   | 14.55704    | 0.43 | 2.9%   |
| Sec24c   | 25.40924    | 0.82 | 3.2%   |
| Sec24d   | 6.200786    | 0.28 | 4.5%   |
| Sec31a   | 2.414654    | 0.34 | 14.2%  |
| Sec31b   | 0.05004572  | 0.01 | 18.7%  |
| Sec31l1  | 51.26798    | 1.06 | 2.1%   |
| Sec61a1  | 42.86256    | 4.56 | 10.6%  |
| Sec61a2  | 44.23348    | 2.65 | 6.0%   |
| Sec61b   | 8.222726    | 0.94 | 11.5%  |
| Sec61g   | 0.2255302   | 0.17 | 76.6%  |
| Sec63    | 12.59124    | 0.47 | 3.7%   |
| Secisbp2 | 3.050162    | 0.22 | 7.2%   |
| Sectm1a  | 0.01514468  | 0.02 | 153.2% |
| Sectm1b  | 0           | 0.00 |        |
| Sef      | 0.02398354  | 0.01 | 31.5%  |
| Seh1l    | 14.61818    | 0.43 | 3.0%   |
| Sel1h    | 0.6528978   | 0.30 | 45.6%  |
| Sel1l    | 33.68884    | 1.65 | 4.9%   |
| Sel1l2   | 0           | 0.00 |        |
| Sele     | 0.00220246  | 0.00 | 223.6% |
| Selenbp1 | 0.4754826   | 0.15 | 30.5%  |
| Selenbp2 | 0.09424008  | 0.10 | 105.3% |
| Selk     | 34.64794    | 2.93 | 8.4%   |
| Sell     | 0           | 0.00 |        |
| Selm     | 55.07076    | 3.67 | 6.7%   |
| Selp     | 0.00270662  | 0.01 | 223.6% |
| Selpl    | 0.001387556 | 0.00 | 223.6% |
| Selplg   | 0.00154574  | 0.00 | 223.6% |
| Sema3a   | 5.228714    | 0.50 | 9.5%   |
| Sema3b   | 0.21167     | 0.05 | 23.0%  |
| Sema3c   | 3.329864    | 0.26 | 7.7%   |
| Sema3d   | 0.6434898   | 0.08 | 11.9%  |
| Sema3e   | 1.314458    | 0.03 | 2.5%   |
| Sema3f   | 2.259454    | 0.17 | 7.7%   |
| Sema3g   | 0.0562816   | 0.02 | 34.1%  |
| Sema4a   | 8.52321     | 0.96 | 11.3%  |

|           |             |       |        |
|-----------|-------------|-------|--------|
| Sema4b    | 3.761986    | 0.30  | 8.0%   |
| Sema4c    | 2.718238    | 0.15  | 5.4%   |
| Sema4d    | 7.845624    | 0.36  | 4.6%   |
| Sema4f    | 8.173662    | 0.44  | 5.4%   |
| Sema4g    | 27.25826    | 0.84  | 3.1%   |
| Sema5a    | 31.85062    | 2.20  | 6.9%   |
| Sema5b    | 3.034466    | 0.22  | 7.2%   |
| Sema6a    | 12.18062    | 0.56  | 4.6%   |
| Sema6b    | 20.37368    | 0.49  | 2.4%   |
| Sema6c    | 7.827888    | 0.64  | 8.2%   |
| Sema6d    | 25.39422    | 0.80  | 3.2%   |
| Sema7a    | 11.25232    | 0.83  | 7.3%   |
| Semcap2   | 0.04923498  | 0.02  | 35.7%  |
| Semcap3   | 0.038945    | 0.01  | 16.0%  |
| Senp1     | 4.31942     | 0.28  | 6.5%   |
| Senp2     | 20.4263     | 0.41  | 2.0%   |
| Senp3     | 14.02234    | 1.11  | 7.9%   |
| Senp5     | 12.89744    | 0.77  | 5.9%   |
| Senp6     | 14.36144    | 0.64  | 4.5%   |
| Senp7     | 13.8341     | 2.16  | 15.6%  |
| Senp8     | 4.29316     | 0.41  | 9.6%   |
| Sephs1    | 8.805182    | 0.67  | 7.6%   |
| Sephs2    | 18.4902     | 0.66  | 3.6%   |
| Sepn1     | 6.950868    | 0.60  | 8.6%   |
| Sepp1     | 48.77016    | 4.35  | 8.9%   |
| Sepsecs   | 2.211934    | 0.39  | 17.6%  |
| Sepw1     | 171.818     | 27.01 | 15.7%  |
| Sepx1     | 14.27308    | 1.87  | 13.1%  |
| Serac1    | 4.518646    | 0.86  | 19.0%  |
| serase-1B | 0.04957128  | 0.02  | 48.6%  |
| Serbp1    | 57.59702    | 4.34  | 7.5%   |
| Serf1     | 12.64568    | 0.89  | 7.0%   |
| Serf2     | 15.41192    | 1.35  | 8.7%   |
| Sergef    | 7.06202     | 0.39  | 5.5%   |
| Serhl     | 6.636936    | 1.16  | 17.5%  |
| Serinc1   | 358.815     | 10.43 | 2.9%   |
| Serinc2   | 0.2346418   | 0.03  | 13.3%  |
| Serinc3   | 82.28818    | 1.07  | 1.3%   |
| Serinc5   | 8.616396    | 0.23  | 2.7%   |
| Serpina10 | 0.01105408  | 0.01  | 93.9%  |
| Serpina11 | 0           | 0.00  |        |
| Serpina12 | 0.001652184 | 0.00  | 223.6% |
| Serpina1a | 0.00421776  | 0.01  | 223.6% |
| Serpina1b | 0           | 0.00  |        |
| Serpina1c | 0           | 0.00  |        |
| Serpina1d | 0           | 0.00  |        |
| Serpina1e | 0           | 0.00  |        |

|              |            |       |        |
|--------------|------------|-------|--------|
| Serpina1f    | 0          | 0.00  |        |
| Serpina3a    | 0.00593882 | 0.01  | 137.3% |
| Serpina3b    | 0          | 0.00  |        |
| Serpina3c    | 0.4409588  | 0.12  | 27.4%  |
| Serpina3f    | 0.8925866  | 0.17  | 18.8%  |
| Serpina3g    | 0.2320222  | 0.05  | 20.8%  |
| Serpina3h    | 0.1567086  | 0.03  | 21.8%  |
| Serpina3k    | 0.06280456 | 0.04  | 56.7%  |
| Serpina3m    | 0.2293918  | 0.09  | 40.6%  |
| Serpina3n    | 20.7181    | 1.92  | 9.3%   |
| Serpina4-ps1 | 0          | 0.00  |        |
| Serpina5     | 0          | 0.00  |        |
| Serpina6     | 0.0051868  | 0.01  | 223.6% |
| Serpina7     | 0          | 0.00  |        |
| Serpina9     | 0.08527262 | 0.01  | 15.2%  |
| Serpinb10    | 0          | 0.00  |        |
| Serpinb11    | 0          | 0.00  |        |
| Serpinb12    | 0.00721344 | 0.02  | 223.6% |
| Serpinb13    | 0          | 0.00  |        |
| Serpinb1a    | 0.2699046  | 0.04  | 16.2%  |
| Serpinb1b    | 13.59534   | 2.05  | 15.1%  |
| Serpinb1c    | 0.10042198 | 0.06  | 63.7%  |
| Serpinb2     | 0.021179   | 0.02  | 100.9% |
| Serpinb3a    | 0.01048192 | 0.02  | 223.6% |
| Serpinb3b    | 0          | 0.00  |        |
| Serpinb3c    | 0          | 0.00  |        |
| Serpinb3d    | 0          | 0.00  |        |
| Serpinb5     | 0.04350324 | 0.02  | 57.4%  |
| Serpinb6a    | 8.10331    | 0.47  | 5.8%   |
| Serpinb6b    | 0.1889258  | 0.07  | 36.6%  |
| Serpinb6c    | 0.1748908  | 0.05  | 26.6%  |
| Serpinb7     | 0.0037393  | 0.01  | 223.6% |
| Serpinb8     | 0.07076986 | 0.04  | 55.8%  |
| Serpinb9     | 3.59859    | 0.41  | 11.3%  |
| Serpinb9b    | 0.15258828 | 0.05  | 31.4%  |
| Serpinb9c    | 0.039645   | 0.03  | 63.6%  |
| Serpinb9d    | 0          | 0.00  |        |
| Serpinb9e    | 0.02430022 | 0.02  | 91.0%  |
| Serpinb9f    | 0          | 0.00  |        |
| Serpinb9g    | 0          | 0.00  |        |
| Serpinc1     | 0.00245736 | 0.01  | 223.6% |
| Serpind1     | 0.00801608 | 0.01  | 144.4% |
| Serpine1     | 0.04610028 | 0.05  | 108.8% |
| Serpine2     | 131.9286   | 10.33 | 7.8%   |
| Serpinf1     | 9.782934   | 0.74  | 7.6%   |
| Serpinf2     | 0.00220528 | 0.00  | 223.6% |
| Serping1     | 1.93935    | 0.58  | 29.7%  |

|          |            |      |        |
|----------|------------|------|--------|
| Serpinh1 | 26.04582   | 5.28 | 20.3%  |
| Serpini1 | 154.8006   | 3.71 | 2.4%   |
| Serpini2 | 0.00428202 | 0.01 | 223.6% |
| SerRSmt  | 0.406847   | 0.04 | 11.0%  |
| Sertad1  | 0.8716214  | 0.11 | 12.6%  |
| Sertad2  | 2.583868   | 0.14 | 5.5%   |
| Sertad3  | 0.6250848  | 0.05 | 8.1%   |
| Sertad4  | 6.729202   | 0.50 | 7.5%   |
| Sesn1    | 11.79848   | 0.89 | 7.6%   |
| Sesn2    | 19.66428   | 0.84 | 4.3%   |
| Sesn3    | 20.4794    | 2.02 | 9.9%   |
| Sestd1   | 6.554886   | 0.60 | 9.1%   |
| Set      | 19.02396   | 1.68 | 8.8%   |
| Setbp1   | 2.148468   | 0.30 | 13.8%  |
| Setd1a   | 6.697804   | 0.53 | 7.9%   |
| Setd1b   | 3.096588   | 0.11 | 3.7%   |
| Setd2    | 11.89742   | 0.43 | 3.6%   |
| Setd3    | 19.33892   | 0.51 | 2.7%   |
| Setd4    | 1.537768   | 0.17 | 11.0%  |
| Setd5    | 19.01402   | 0.37 | 2.0%   |
| Setd6    | 3.075562   | 0.61 | 20.0%  |
| Setd7    | 4.306074   | 0.47 | 11.0%  |
| Setd8    | 8.415378   | 0.63 | 7.5%   |
| Setdb1   | 10.41978   | 0.11 | 1.1%   |
| Setdb2   | 0.6888016  | 0.05 | 6.6%   |
| Setmar   | 1.766674   | 0.16 | 9.2%   |
| Setx     | 11.2068    | 0.46 | 4.1%   |
| Sez4     | 0.5524124  | 0.13 | 24.0%  |
| Sez6     | 21.69768   | 1.85 | 8.5%   |
| Sez6l    | 25.32596   | 0.99 | 3.9%   |
| Sez6l2   | 64.14068   | 2.59 | 4.0%   |
| Sf1      | 46.2581    | 1.00 | 2.2%   |
| Sf3a1    | 18.88816   | 0.81 | 4.3%   |
| Sf3a2    | 13.12924   | 0.96 | 7.3%   |
| Sf3a3    | 8.323288   | 0.62 | 7.5%   |
| Sf3b1    | 48.28922   | 1.99 | 4.1%   |
| Sf3b2    | 78.65164   | 1.37 | 1.7%   |
| Sf3b3    | 20.36326   | 1.07 | 5.3%   |
| Sf3b4    | 7.603918   | 0.73 | 9.6%   |
| Sf3b5    | 14.48352   | 1.06 | 7.3%   |
| Sf4      | 12.54514   | 0.64 | 5.1%   |
| Sfi1     | 33.5675    | 2.76 | 8.2%   |
| Sfmbt1   | 5.55896    | 0.51 | 9.2%   |
| Sfmbt2   | 6.106002   | 1.30 | 21.3%  |
| Sfn      | 0.2727544  | 0.06 | 21.6%  |
| Sfpi1    | 0          | 0.00 |        |
| Sfpq     | 39.9992    | 4.07 | 10.2%  |



|            |            |      |        |
|------------|------------|------|--------|
| Sfrp1      | 9.59658    | 0.60 | 6.2%   |
| Sfrp2      | 3.908704   | 0.35 | 9.0%   |
| Sfrp4      | 0.4296566  | 0.04 | 9.4%   |
| Sfrp5      | 0.07568734 | 0.02 | 30.6%  |
| Sfrs1      | 36.52548   | 0.91 | 2.5%   |
| Sfrs10     | 9.544482   | 0.38 | 4.0%   |
| Sfrs11     | 44.2133    | 4.11 | 9.3%   |
| Sfrs12     | 12.05242   | 0.99 | 8.2%   |
| Sfrs14     | 30.31724   | 1.49 | 4.9%   |
| Sfrs15     | 8.710244   | 0.56 | 6.4%   |
| Sfrs16     | 2.833344   | 0.84 | 29.7%  |
| Sfrs17b    | 6.250554   | 0.22 | 3.5%   |
| Sfrs2      | 43.0481    | 3.08 | 7.2%   |
| Sfrs2ip    | 10.390788  | 0.51 | 4.9%   |
| Sfrs3      | 22.05554   | 0.78 | 3.5%   |
| Sfrs4      | 13.68392   | 1.22 | 8.9%   |
| Sfrs5      | 29.30978   | 0.71 | 2.4%   |
| Sfrs6      | 31.89954   | 0.50 | 1.6%   |
| Sfrs7      | 29.87606   | 2.09 | 7.0%   |
| Sfrs8      | 13.78152   | 0.46 | 3.3%   |
| Sfrs9      | 11.25818   | 0.70 | 6.2%   |
| Sft2d1     | 1.9233776  | 1.21 | 62.9%  |
| Sft2d2     | 1.452096   | 0.17 | 12.0%  |
| Sft2d3     | 1.544646   | 0.17 | 11.2%  |
| Sftpa1     | 0.00767948 | 0.01 | 91.8%  |
| Sftpb      | 0.00721924 | 0.01 | 139.8% |
| Sftpc      | 0.02989488 | 0.03 | 99.5%  |
| Sftpd      | 0.0133627  | 0.01 | 99.8%  |
| Sfxn1      | 25.59938   | 1.37 | 5.3%   |
| Sfxn2      | 1.536818   | 0.21 | 13.4%  |
| Sfxn3      | 41.77814   | 2.02 | 4.8%   |
| Sfxn4      | 7.526214   | 0.24 | 3.2%   |
| Sfxn5      | 34.71516   | 3.62 | 10.4%  |
| Sgca       | 0.05123548 | 0.04 | 78.5%  |
| Sgcb       | 29.98362   | 1.81 | 6.0%   |
| Sgcd       | 1.2325724  | 0.40 | 32.1%  |
| Sgce       | 12.61142   | 0.81 | 6.4%   |
| Sgcg       | 0.04448172 | 0.01 | 32.1%  |
| Sgcz       | 1.294466   | 0.15 | 12.0%  |
| sgigsf     | 0.0577442  | 0.04 | 71.0%  |
| Sgip1      | 36.5596    | 4.27 | 11.7%  |
| SGIP1alpha | 8.569484   | 4.22 | 49.3%  |
| Sgk        | 5.465068   | 0.46 | 8.4%   |
| Sgk2       | 0.0512171  | 0.03 | 53.1%  |
| Sgk269     | 2.943648   | 0.30 | 10.3%  |
| Sgk3       | 0.4740794  | 0.09 | 18.0%  |
| Sgms1      | 8.091782   | 0.23 | 2.8%   |

|          |            |      |        |
|----------|------------|------|--------|
| Sgms2    | 0.4020214  | 0.11 | 27.6%  |
| Sgo1     | 0.1211182  | 0.27 | 223.6% |
| Sgol1    | 0.2595978  | 0.10 | 38.5%  |
| Sgol2    | 0.5613734  | 0.06 | 10.9%  |
| Sgpl1    | 8.536728   | 0.30 | 3.5%   |
| Sgpp1    | 13.07184   | 0.88 | 6.8%   |
| Sgpp2    | 3.126964   | 1.03 | 33.0%  |
| Sgsh     | 0.8838504  | 0.11 | 12.2%  |
| Sgsm1    | 18.24102   | 1.58 | 8.7%   |
| Sgsm2    | 17.96586   | 1.14 | 6.4%   |
| Sgsm3    | 20.44942   | 0.50 | 2.5%   |
| Sgta     | 54.56468   | 4.36 | 8.0%   |
| Sgtb     | 24.24634   | 1.08 | 4.5%   |
| Sh2b1    | 11.088708  | 1.51 | 13.6%  |
| Sh2b2    | 3.327704   | 0.26 | 7.7%   |
| Sh2b3    | 2.591186   | 0.34 | 13.2%  |
| Sh2bpsm1 | 7.919538   | 1.58 | 19.9%  |
| Sh2d1a   | 0.0058008  | 0.01 | 223.6% |
| Sh2d1b1  | 0.01493224 | 0.01 | 93.8%  |
| Sh2d1b2  | 0          | 0.00 |        |
| Sh2d2a   | 0          | 0.00 |        |
| Sh2d3c   | 10.410812  | 0.74 | 7.1%   |
| Sh2d4a   | 0.09798658 | 0.02 | 21.7%  |
| Sh2d4b   | 0.0472029  | 0.02 | 49.2%  |
| Sh2d5    | 9.84012    | 0.56 | 5.7%   |
| Sh3bgr   | 1.479408   | 0.24 | 16.2%  |
| Sh3bgrl  | 38.1769    | 1.54 | 4.0%   |
| Sh3bgrl2 | 12.46872   | 1.41 | 11.3%  |
| Sh3bgrl3 | 55.65294   | 6.98 | 12.5%  |
| Sh3bp1   | 2.739704   | 0.59 | 21.7%  |
| Sh3bp2   | 1.596522   | 0.32 | 20.0%  |
| Sh3bp4   | 8.188316   | 0.34 | 4.1%   |
| Sh3bp5   | 17.5408    | 2.18 | 12.4%  |
| Sh3bp5l  | 17.3423    | 0.25 | 1.5%   |
| Sh3d19   | 4.510386   | 0.45 | 10.0%  |
| SH3d19   | 1.479318   | 0.43 | 29.1%  |
| Sh3gl1   | 10.61792   | 0.85 | 8.0%   |
| Sh3gl2   | 82.0416    | 2.43 | 3.0%   |
| Sh3gl3   | 11.85902   | 0.30 | 2.5%   |
| Sh3glb1  | 11.48138   | 1.16 | 10.1%  |
| Sh3glb2  | 41.53588   | 2.17 | 5.2%   |
| Sh3kbp1  | 12.12684   | 0.68 | 5.6%   |
| Sh3md4   | 2.852928   | 0.29 | 10.0%  |
| Sh3px3   | 0.8701394  | 0.19 | 22.0%  |
| Sh3pxd2a | 4.965126   | 0.73 | 14.8%  |
| Sh3pxd2b | 3.715502   | 0.18 | 4.8%   |
| Sh3rf1   | 5.957548   | 0.38 | 6.5%   |

|          |             |      |        |
|----------|-------------|------|--------|
| Sh3rf2   | 0.001702764 | 0.00 | 223.6% |
| Sh3tc1   | 0.02574324  | 0.01 | 25.9%  |
| Sh3tc2   | 0.08243042  | 0.06 | 70.1%  |
| Sh3yl1   | 5.637996    | 0.57 | 10.1%  |
| Shag1    | 0.0783712   | 0.02 | 29.2%  |
| Shank2   | 5.891272    | 0.23 | 4.0%   |
| Shank3   | 17.05286    | 0.43 | 2.5%   |
| Sharpin  | 13.88148    | 0.74 | 5.3%   |
| Shb      | 4.579842    | 0.60 | 13.1%  |
| Shbg     | 0           | 0.00 |        |
| Shc1     | 2.98758     | 0.38 | 12.6%  |
| Shc2     | 10.111196   | 0.60 | 5.9%   |
| Shc3     | 8.281078    | 0.97 | 11.8%  |
| Shc4     | 1.0410532   | 0.15 | 14.5%  |
| Shcbp1   | 1.0081914   | 0.16 | 15.4%  |
| Shd      | 15.04402    | 1.42 | 9.5%   |
| She      | 0.19308     | 0.05 | 27.6%  |
| Shf      | 7.624726    | 0.50 | 6.5%   |
| Shfm1    | 49.58576    | 2.03 | 4.1%   |
| Shh      | 1.53634     | 0.20 | 12.8%  |
| Ship     | 0.005240088 | 0.00 | 73.3%  |
| Shkbp1   | 2.469766    | 0.47 | 19.0%  |
| Shmt1    | 0.645802    | 0.14 | 21.4%  |
| Shmt2    | 8.88795     | 1.08 | 12.2%  |
| Shoc2    | 38.25654    | 2.43 | 6.4%   |
| Shoca-1  | 0.02248308  | 0.02 | 68.3%  |
| Shox2    | 1.383598    | 0.23 | 16.7%  |
| Shprh    | 10.349024   | 0.47 | 4.6%   |
| Shq1     | 1.401206    | 0.06 | 4.1%   |
| Shroom1  | 0.09276558  | 0.01 | 11.3%  |
| Shroom2  | 57.88776    | 4.13 | 7.1%   |
| Shroom3  | 0.7676732   | 0.07 | 8.6%   |
| Shroom4  | 0.1562488   | 0.01 | 9.4%   |
| Shyc     | 0.2493546   | 0.06 | 25.5%  |
| Si       | 0.08745846  | 0.03 | 33.6%  |
| Siae     | 7.002494    | 0.42 | 6.0%   |
| Siah1a   | 13.02862    | 0.81 | 6.2%   |
| Siah1b   | 2.44034     | 0.25 | 10.1%  |
| Siah2    | 6.686924    | 0.48 | 7.2%   |
| sid2895  | 0.0711864   | 0.05 | 70.1%  |
| Sid470   | 1.53669     | 0.67 | 43.4%  |
| Sidt1    | 6.104522    | 0.21 | 3.5%   |
| Sidt2    | 23.71546    | 0.51 | 2.2%   |
| Sigirr   | 0.02232038  | 0.02 | 79.3%  |
| Siglec1  | 0           | 0.00 |        |
| Siglec15 | 0           | 0.00 |        |
| Siglec5  | 0.004640482 | 0.01 | 151.9% |

|           |             |      |        |
|-----------|-------------|------|--------|
| Siglece   | 0           | 0.00 |        |
| Siglecf   | 0.000879104 | 0.00 | 223.6% |
| Siglecg   | 0.0050447   | 0.01 | 138.1% |
| Siglech   | 0           | 0.00 |        |
| SIK2      | 1.706714    | 0.76 | 44.4%  |
| SI1       | 8.562894    | 0.61 | 7.1%   |
| Sim1      | 0.002400478 | 0.00 | 140.5% |
| Sim2      | 0.03402238  | 0.01 | 40.1%  |
| Sin3a     | 5.735026    | 0.26 | 4.5%   |
| Sin3b     | 28.88548    | 1.89 | 6.5%   |
| Sip1      | 2.018982    | 0.10 | 4.8%   |
| Sipa1     | 0.9416612   | 0.07 | 7.6%   |
| Sipa111   | 7.142004    | 0.50 | 6.9%   |
| Sipa112   | 9.548048    | 0.68 | 7.2%   |
| Sipa113   | 6.048478    | 0.23 | 3.8%   |
| Sirpa     | 25.89752    | 1.89 | 7.3%   |
| Sirpb1    | 0.00971616  | 0.01 | 138.6% |
| SIRP-beta | 0           | 0.00 |        |
| Sirt1     | 2.638522    | 0.13 | 5.0%   |
| Sirt2     | 23.19174    | 0.71 | 3.1%   |
| Sirt3     | 25.79026    | 1.39 | 5.4%   |
| Sirt4     | 4.36588     | 0.46 | 10.6%  |
| Sirt5     | 3.509098    | 0.16 | 4.6%   |
| Sirt6     | 9.454932    | 0.77 | 8.1%   |
| Sirt7     | 7.005908    | 0.40 | 5.7%   |
| Sit1      | 0           | 0.00 |        |
| Siva      | 0.53134     | 0.10 | 19.2%  |
| Siva1     | 1.962108    | 0.49 | 24.8%  |
| Six1      | 0.5541982   | 0.07 | 12.1%  |
| Six2      | 0.2096024   | 0.04 | 20.1%  |
| Six3      | 0.08210076  | 0.04 | 49.5%  |
| Six4      | 0.272546    | 0.06 | 22.8%  |
| Six5      | 0.479012    | 0.13 | 26.4%  |
| Six6      | 0.1211056   | 0.02 | 15.2%  |
| Six6os1   | 1.38505     | 0.18 | 13.3%  |
| Skap1     | 0.18035634  | 0.07 | 36.4%  |
| Skap2     | 7.857358    | 0.34 | 4.4%   |
| Ski       | 11.95538    | 0.70 | 5.8%   |
| Skil      | 12.0096     | 0.35 | 2.9%   |
| Skint1    | 0           | 0.00 |        |
| Skint10   | 0           | 0.00 |        |
| Skint5    | 0.00207872  | 0.00 | 223.6% |
| Skint6    | 0           | 0.00 |        |
| Skint7    | 0.0123931   | 0.02 | 138.6% |
| Skiv21    | 11.27462    | 0.49 | 4.4%   |
| Skiv212   | 19.5747     | 0.91 | 4.6%   |
| Skp1a     | 175.1768    | 4.27 | 2.4%   |

|          |            |      |        |
|----------|------------|------|--------|
| Skp2     | 2.15107    | 0.16 | 7.4%   |
| SKRP1    | 1.537962   | 0.24 | 15.3%  |
| Sla      | 1.19615    | 0.11 | 9.0%   |
| Sla2     | 0.36807432 | 0.48 | 130.4% |
| Slain1   | 4.51493    | 0.32 | 7.0%   |
| Slain2   | 5.815384   | 0.34 | 5.9%   |
| Slamf1   | 0.00303452 | 0.01 | 223.6% |
| Slamf6   | 0          | 0.00 |        |
| Slamf7   | 0          | 0.00 |        |
| Slamf8   | 0          | 0.00 |        |
| Slamf9   | 0.0581654  | 0.03 | 56.4%  |
| Slbp     | 12.71808   | 0.38 | 3.0%   |
| Slc10a1  | 0.05178984 | 0.02 | 43.2%  |
| Slc10a2  | 0          | 0.00 |        |
| Slc10a3  | 1.499548   | 0.10 | 7.0%   |
| Slc10a4  | 0.0591908  | 0.03 | 47.5%  |
| Slc10a5  | 0.04068452 | 0.01 | 32.3%  |
| Slc10a6  | 0.0136661  | 0.02 | 116.7% |
| Slc10a7  | 1.916072   | 0.24 | 12.3%  |
| Slc11a1  | 0.04012622 | 0.03 | 63.9%  |
| Slc11a2  | 12.88548   | 0.21 | 1.6%   |
| Slc12a1  | 0.04020036 | 0.02 | 50.0%  |
| Slc12a2  | 5.433442   | 0.16 | 3.0%   |
| Slc12a3  | 0.01617516 | 0.01 | 70.4%  |
| Slc12a4  | 2.165908   | 0.37 | 17.0%  |
| Slc12a5  | 98.30882   | 4.32 | 4.4%   |
| Slc12a6  | 19.03412   | 1.39 | 7.3%   |
| Slc12a7  | 1.229522   | 0.08 | 6.8%   |
| Slc12a8  | 0.35608    | 0.08 | 21.8%  |
| Slc12a9  | 7.561264   | 0.39 | 5.2%   |
| Slc13a1  | 0          | 0.00 |        |
| Slc13a2  | 0          | 0.00 |        |
| Slc13a3  | 0.2173744  | 0.03 | 12.9%  |
| Slc13a4  | 0.0131529  | 0.02 | 139.1% |
| Slc13a5  | 0.10761916 | 0.07 | 63.4%  |
| Slc14a1  | 0.4527194  | 0.10 | 22.2%  |
| Slc14a2  | 0.6853846  | 0.04 | 6.4%   |
| Slc15a1  | 0.01152024 | 0.01 | 119.4% |
| Slc15a2  | 2.131466   | 0.21 | 9.7%   |
| Slc15a3  | 0.4447852  | 0.51 | 115.1% |
| Slc15a4  | 7.50346    | 0.41 | 5.4%   |
| Slc16a1  | 9.368726   | 0.59 | 6.3%   |
| Slc16a10 | 0.368455   | 0.05 | 13.3%  |
| Slc16a11 | 0.8899376  | 0.17 | 19.1%  |
| Slc16a12 | 0.5347006  | 0.10 | 18.2%  |
| Slc16a13 | 3.112066   | 0.17 | 5.3%   |
| Slc16a14 | 4.363236   | 0.45 | 10.3%  |

|          |            |      |        |
|----------|------------|------|--------|
| Slc16a2  | 4.80443    | 0.20 | 4.1%   |
| Slc16a3  | 13.785166  | 3.40 | 24.6%  |
| Slc16a4  | 0.15392636 | 0.06 | 41.9%  |
| Slc16a5  | 0.1684916  | 0.04 | 23.6%  |
| Slc16a6  | 4.335214   | 1.94 | 44.8%  |
| Slc16a7  | 5.79362    | 0.55 | 9.5%   |
| Slc16a8  | 0.14696112 | 0.06 | 41.3%  |
| Slc16a9  | 1.82587    | 0.26 | 14.5%  |
| Slc17a1  | 0.0045395  | 0.01 | 223.6% |
| Slc17a2  | 0.00261706 | 0.01 | 223.6% |
| Slc17a3  | 0.00530208 | 0.01 | 137.0% |
| Slc17a4  | 0.00285446 | 0.01 | 223.6% |
| Slc17a5  | 4.316486   | 0.62 | 14.5%  |
| Slc17a6  | 100.8006   | 3.29 | 3.3%   |
| Slc17a7  | 0.13309144 | 0.03 | 24.8%  |
| Slc17a8  | 0.11618276 | 0.04 | 34.7%  |
| Slc18a1  | 0.2486644  | 0.06 | 22.9%  |
| Slc18a2  | 1.837598   | 0.19 | 10.6%  |
| Slc18a3  | .11136772  | 0.20 | 17.7%  |
| Slc19a1  | 6.817478   | 0.31 | 4.5%   |
| Slc19a2  | 8.552812   | 0.21 | 2.5%   |
| Slc19a3  | 0.10208024 | 0.08 | 74.9%  |
| Slc1a1   | 28.22234   | 0.80 | 2.8%   |
| Slc1a2   | 15.21236   | 1.87 | 12.3%  |
| Slc1a3   | 27.60352   | 2.59 | 9.4%   |
| Slc1a4   | 33.21738   | 2.21 | 6.7%   |
| Slc1a5   | 4.01419    | 0.50 | 12.5%  |
| Slc1a6   | 14.83118   | 1.00 | 6.7%   |
| Slc1a7   | 0          | 0.00 |        |
| Slc20a1  | 40.46036   | 0.65 | 1.6%   |
| Slc20a2  | 12.29564   | 0.42 | 3.4%   |
| Slc21a7  | 0.03790398 | 0.02 | 55.1%  |
| Slc22a1  | 0.00809182 | 0.02 | 223.6% |
| Slc22a12 | 0.03778912 | 0.01 | 16.1%  |
| Slc22a13 | 0.03012802 | 0.03 | 94.3%  |
| Slc22a14 | 0.01791736 | 0.02 | 117.6% |
| Slc22a15 | 1.2422554  | 0.92 | 74.3%  |
| Slc22a16 | 0          | 0.00 |        |
| Slc22a17 | 109.1208   | 5.09 | 4.7%   |
| Slc22a18 | 0.1810446  | 0.12 | 67.8%  |
| Slc22a2  | 0.00310658 | 0.01 | 223.6% |
| Slc22a20 | 0          | 0.00 |        |
| Slc22a21 | 1.274554   | 0.17 | 13.3%  |
| Slc22a3  | 0.1521016  | 0.03 | 20.3%  |
| Slc22a4  | 0.4686322  | 0.09 | 18.4%  |
| Slc22a5  | 2.5238     | 0.18 | 7.3%   |
| Slc22a6  | 0.00343378 | 0.01 | 223.6% |

|          |             |       |        |
|----------|-------------|-------|--------|
| Slc22a7  | 0.03953986  | 0.02  | 52.3%  |
| Slc22a8  | 0.00494134  | 0.01  | 137.0% |
| Slc22a9  | 0           | 0.00  |        |
| Slc23a1  | 0.01927442  | 0.01  | 65.8%  |
| Slc23a2  | 22.32812    | 1.26  | 5.7%   |
| Slc23a3  | 0.00707444  | 0.01  | 138.4% |
| Slc24a1  | 0.001429818 | 0.00  | 223.6% |
| Slc24a2  | 22.51468    | 1.93  | 8.6%   |
| Slc24a3  | 57.52554    | 2.13  | 3.7%   |
| Slc24a4  | 1.1934586   | 0.14  | 12.1%  |
| Slc24a5  | 0.451272    | 0.17  | 36.6%  |
| Slc24a6  | 0.2312102   | 0.04  | 15.4%  |
| Slc25a1  | 45.51886    | 2.55  | 5.6%   |
| Slc25a10 | 5.050398    | 0.38  | 7.5%   |
| Slc25a11 | 68.6164     | 1.23  | 1.8%   |
| Slc25a12 | 68.11988    | 0.99  | 1.5%   |
| Slc25a13 | 0.8154248   | 0.13  | 15.6%  |
| Slc25a14 | 14.13176    | 0.45  | 3.2%   |
| Slc25a15 | 3.31774     | 0.11  | 3.3%   |
| Slc25a16 | 9.813074    | 0.65  | 6.6%   |
| Slc25a17 | 23.24848    | 1.96  | 8.4%   |
| Slc25a18 | 2.664706    | 0.27  | 10.1%  |
| Slc25a19 | 8.55165     | 0.65  | 7.6%   |
| Slc25a2  | 0.20835418  | 0.07  | 36.0%  |
| Slc25a20 | 9.450778    | 0.65  | 6.9%   |
| Slc25a21 | 0.06797092  | 0.03  | 37.4%  |
| Slc25a22 | 33.87524    | 1.48  | 4.4%   |
| Slc25a23 | 52.0449     | 3.20  | 6.1%   |
| Slc25a24 | 1.0088124   | 0.10  | 10.0%  |
| Slc25a25 | 18.7282     | 0.92  | 4.9%   |
| Slc25a26 | 3.650614    | 0.30  | 8.2%   |
| Slc25a27 | 11.35424    | 0.56  | 4.9%   |
| Slc25a28 | 11.8438     | 0.54  | 4.5%   |
| Slc25a29 | 3.439206    | 0.13  | 3.8%   |
| Slc25a3  | 216.9346    | 5.48  | 2.5%   |
| Slc25a30 | 2.150112    | 0.33  | 15.2%  |
| Slc25a31 | 0.06477354  | 0.02  | 36.5%  |
| Slc25a32 | 4.992884    | 0.65  | 13.1%  |
| Slc25a33 | 16.28822    | 0.69  | 4.2%   |
| Slc25a34 | 0.08404336  | 0.04  | 43.0%  |
| Slc25a35 | 1.924886    | 0.38  | 19.6%  |
| Slc25a36 | 14.40818    | 0.64  | 4.5%   |
| Slc25a37 | 5.64791     | 1.05  | 18.5%  |
| Slc25a38 | 12.26042    | 0.28  | 2.3%   |
| Slc25a39 | 49.86926    | 2.19  | 4.4%   |
| Slc25a4  | 485.6796    | 20.64 | 4.2%   |
| Slc25a40 | 2.558716    | 0.89  | 34.7%  |

|          |            |      |        |
|----------|------------|------|--------|
| Slc25a41 | 0.374495   | 0.03 | 7.8%   |
| Slc25a42 | 4.664064   | 0.80 | 17.2%  |
| Slc25a43 | 0.00975844 | 0.01 | 137.0% |
| Slc25a44 | 28.93902   | 1.02 | 3.5%   |
| Slc25a45 | 0.14246396 | 0.09 | 63.7%  |
| Slc25a46 | 33.55222   | 0.99 | 2.9%   |
| Slc25a5  | 89.92608   | 4.86 | 5.4%   |
| Slc26a1  | 1.285328   | 0.17 | 13.2%  |
| Slc26a11 | 0.8362924  | 0.09 | 10.3%  |
| Slc26a2  | 1.491272   | 0.08 | 5.6%   |
| Slc26a3  | 0.0059442  | 0.01 | 140.6% |
| Slc26a4  | 0.0071326  | 0.01 | 94.1%  |
| Slc26a5  | 0.02527446 | 0.01 | 25.0%  |
| Slc26a6  | 4.815716   | 0.20 | 4.1%   |
| Slc26a7  | 0.06365958 | 0.05 | 71.8%  |
| Slc26a8  | 0.5866196  | 0.09 | 15.3%  |
| Slc26a9  | 0.05149594 | 0.03 | 50.9%  |
| Slc27a1  | 9.136008   | 0.62 | 6.8%   |
| Slc27a2  | 3.833168   | 0.24 | 6.3%   |
| Slc27a3  | 4.424466   | 0.30 | 6.7%   |
| Slc27a4  | 52.71188   | 2.70 | 5.1%   |
| Slc27a5  | 0.11884436 | 0.03 | 29.3%  |
| Slc27a6  | 0.14495052 | 0.04 | 27.7%  |
| Slc28a1  | 0.0262064  | 0.02 | 84.4%  |
| Slc28a2  | 0.16479274 | 0.06 | 35.9%  |
| Slc28a3  | 0          | 0.00 |        |
| Slc29a1  | 2.28911    | 0.23 | 10.2%  |
| Slc29a2  | 14.6404    | 1.19 | 8.2%   |
| Slc29a3  | 1.925098   | 0.13 | 6.8%   |
| Slc29a4  | 12.8746    | 0.65 | 5.0%   |
| Slc2a1   | 7.191206   | 1.52 | 21.1%  |
| Slc2a10  | 0.06798004 | 0.03 | 46.3%  |
| Slc2a12  | 0.2089918  | 0.04 | 19.2%  |
| Slc2a13  | 13.83864   | 0.79 | 5.7%   |
| Slc2a2   | 0.01598786 | 0.02 | 95.9%  |
| Slc2a3   | 61.9302    | 2.93 | 4.7%   |
| Slc2a4   | 0.1792968  | 0.04 | 24.6%  |
| Slc2a5   | 0.01268772 | 0.01 | 105.8% |
| Slc2a6   | 16.91776   | 0.67 | 4.0%   |
| Slc2a8   | 3.759872   | 0.73 | 19.4%  |
| Slc2a9   | 0.13017336 | 0.03 | 26.6%  |
| Slc30a1  | 5.90243    | 0.22 | 3.8%   |
| Slc30a10 | 2.259614   | 0.19 | 8.4%   |
| Slc30a2  | 0.04842134 | 0.03 | 63.3%  |
| Slc30a3  | 4.612816   | 0.59 | 12.7%  |
| Slc30a4  | 9.321496   | 0.76 | 8.2%   |
| Slc30a5  | 16.40474   | 0.49 | 3.0%   |



|         |            |      |        |
|---------|------------|------|--------|
| Slc30a6 | 4.39576    | 0.31 | 7.0%   |
| Slc30a7 | 3.112688   | 0.25 | 7.9%   |
| Slc30a8 | 0.01920038 | 0.01 | 61.7%  |
| Slc30a9 | 51.71028   | 0.95 | 1.8%   |
| Slc31a1 | 16.25862   | 1.43 | 8.8%   |
| Slc31a2 | 2.41473    | 0.30 | 12.5%  |
| Slc32a1 | 11.57476   | 1.34 | 6.2%   |
| Slc33a1 | 12.94528   | 0.73 | 5.6%   |
| Slc34a1 | 0.00460192 | 0.01 | 223.6% |
| Slc34a2 | 0.00588628 | 0.01 | 99.6%  |
| Slc34a3 | 0          | 0.00 |        |
| Slc35a1 | 5.90763    | 0.30 | 5.0%   |
| Slc35a2 | 12.12992   | 0.77 | 6.4%   |
| Slc35a3 | 5.9028     | 0.35 | 6.0%   |
| Slc35a4 | 9.545976   | 0.48 | 5.0%   |
| Slc35a5 | 9.755968   | 0.37 | 3.8%   |
| Slc35b1 | 31.42848   | 1.72 | 5.5%   |
| Slc35b2 | 11.43648   | 0.91 | 8.0%   |
| Slc35b3 | 3.564454   | 0.45 | 12.7%  |
| Slc35b4 | 15.69358   | 0.75 | 4.8%   |
| Slc35c1 | 6.141746   | 0.37 | 6.0%   |
| Slc35c2 | 15.88572   | 1.02 | 6.4%   |
| Slc35d1 | 2.237402   | 0.21 | 9.6%   |
| Slc35d2 | 0.0526234  | 0.01 | 25.5%  |
| Slc35d3 | 0.7947252  | 0.09 | 10.9%  |
| Slc35e1 | 19.20186   | 0.88 | 4.6%   |
| Slc35e3 | 6.837384   | 0.46 | 6.7%   |
| Slc35e4 | 7.49716    | 0.69 | 9.2%   |
| Slc35f1 | 31.87654   | 1.51 | 4.7%   |
| Slc35f2 | 2.018568   | 0.40 | 19.7%  |
| Slc35f3 | 9.221624   | 0.30 | 3.2%   |
| Slc35f4 | 4.432036   | 0.40 | 9.0%   |
| Slc35f5 | 10.94638   | 0.45 | 4.1%   |
| Slc36a1 | 20.04682   | 1.13 | 5.7%   |
| Slc36a2 | 0.00622832 | 0.01 | 138.8% |
| Slc36a3 | 0          | 0.00 |        |
| Slc36a4 | 20.87088   | 1.32 | 6.3%   |
| Slc37a1 | 0.947053   | 0.03 | 3.1%   |
| Slc37a2 | 0.4789678  | 0.07 | 14.9%  |
| Slc37a3 | 14.14686   | 2.62 | 18.5%  |
| Slc37a4 | 8.757724   | 0.30 | 3.4%   |
| Slc38a1 | 63.2884    | 3.64 | 5.8%   |
| Slc38a2 | 32.81884   | 2.08 | 6.3%   |
| Slc38a3 | 2.881952   | 0.68 | 23.8%  |
| Slc38a4 | 0.9335442  | 0.17 | 17.8%  |
| Slc38a5 | 0.02582388 | 0.02 | 66.9%  |
| Slc38a6 | 0.232719   | 0.09 | 36.9%  |

|          |             |      |        |
|----------|-------------|------|--------|
| Slc39a1  | 9.1244      | 1.27 | 14.0%  |
| Slc39a10 | 17.90802    | 1.07 | 6.0%   |
| Slc39a11 | 5.936796    | 0.72 | 12.2%  |
| Slc39a12 | 3.772586    | 0.15 | 4.1%   |
| Slc39a13 | 6.336878    | 0.22 | 3.5%   |
| Slc39a14 | 6.397716    | 0.17 | 2.7%   |
| Slc39a2  | 0.7864096   | 0.18 | 22.9%  |
| Slc39a3  | 19.7388     | 0.60 | 3.0%   |
| Slc39a4  | 0.10224082  | 0.07 | 67.8%  |
| Slc39a5  | 0.00582732  | 0.01 | 137.1% |
| Slc39a6  | 26.70224    | 1.65 | 6.2%   |
| Slc39a7  | 27.26762    | 1.39 | 5.1%   |
| Slc39a8  | 0.337836    | 0.14 | 42.1%  |
| Slc39a9  | 16.85554    | 0.74 | 4.4%   |
| Slc3a1   | 0.200997    | 0.03 | 14.8%  |
| Slc3a2   | 42.4674     | 2.67 | 6.3%   |
| Slc40a1  | 4.527822    | 0.77 | 17.1%  |
| Slc41a1  | 6.173932    | 0.59 | 9.5%   |
| Slc41a2  | 9.648398    | 0.78 | 8.1%   |
| Slc41a3  | 3.994666    | 0.28 | 7.1%   |
| Slc43a1  | 0.4166782   | 0.09 | 21.5%  |
| Slc43a2  | 14.86946    | 1.04 | 7.0%   |
| slc43a2  | 0.3555758   | 0.05 | 12.9%  |
| Slc43a3  | 0.14181238  | 0.06 | 44.9%  |
| Slc44a1  | 11.053356   | 0.76 | 6.9%   |
| Slc44a2  | 12.89884    | 1.01 | 7.9%   |
| Slc44a3  | 0.241093    | 0.09 | 38.0%  |
| Slc44a4  | 0.11609768  | 0.03 | 27.5%  |
| Slc44a5  | 6.04359     | 0.72 | 12.0%  |
| Slc45a1  | 26.01292    | 1.78 | 6.8%   |
| Slc45a2  | 0.06583014  | 0.03 | 45.6%  |
| Slc45a3  | 0.2325786   | 0.09 | 38.4%  |
| Slc45a4  | 16.69028    | 1.75 | 10.5%  |
| Slc46a1  | 5.008762    | 0.44 | 8.8%   |
| Slc46a2  | 0.00222808  | 0.00 | 223.6% |
| Slc46a3  | 1.1009604   | 0.24 | 21.4%  |
| Slc47a1  | 0.004707852 | 0.01 | 149.8% |
| Slc47a2  | 0.0125441   | 0.01 | 59.4%  |
| Slc4a1   | 0.003030684 | 0.00 | 140.9% |
| Slc4a10  | 17.61902    | 0.98 | 5.6%   |
| Slc4a11  | 0.1751148   | 0.03 | 17.6%  |
| Slc4a1ap | 10.93282    | 0.38 | 3.5%   |
| Slc4a2   | 5.648694    | 0.44 | 7.8%   |
| Slc4a3   | 32.4103     | 0.72 | 2.2%   |
| Slc4a4   | 11.47568    | 0.74 | 6.5%   |
| Slc4a7   | 7.764244    | 0.27 | 3.5%   |
| Slc4a8   | 13.80796    | 0.70 | 5.0%   |

|          |             |      |        |
|----------|-------------|------|--------|
| Slc4a9   | 0.021319548 | 0.02 | 87.0%  |
| Slc5a1   | 0.009280942 | 0.01 | 111.4% |
| Slc5a10  | 0.1187821   | 0.09 | 78.2%  |
| Slc5a11  | 0.00598004  | 0.01 | 137.8% |
| Slc5a12  | 0.00904368  | 0.01 | 97.4%  |
| Slc5a2   | 0.02777494  | 0.01 | 25.3%  |
| Slc5a3   | 4.206       | 0.36 | 8.6%   |
| Slc5a4a  | 0.00347626  | 0.01 | 223.6% |
| Slc5a4b  | 0.0033999   | 0.01 | 223.6% |
| Slc5a5   | 0.10416388  | 0.03 | 31.0%  |
| Slc5a6   | 6.289086    | 0.45 | 7.1%   |
| Slc5a7   | 0.4323396   | 0.10 | 22.4%  |
| Slc5a8   | 0.03302666  | 0.02 | 59.4%  |
| Slc5a9   | 0.01548445  | 0.01 | 80.8%  |
| Slc6a1   | 29.97576    | 1.93 | 6.4%   |
| Slc6a11  | 18.27442    | 1.20 | 6.6%   |
| Slc6a12  | 0.02873704  | 0.02 | 58.5%  |
| Slc6a13  | 0.14927276  | 0.06 | 39.4%  |
| Slc6a14  | 0.01641318  | 0.01 | 83.7%  |
| Slc6a15  | 25.04166    | 0.91 | 3.6%   |
| Slc6a17  | 36.26916    | 1.13 | 3.1%   |
| Slc6a18  | 0           | 0.00 |        |
| Slc6a19  | 0           | 0.00 |        |
| Slc6a2   | 0.04421634  | 0.03 | 68.0%  |
| Slc6a20  | 0           | 0.00 |        |
| Slc6a3   | 0.0290507   | 0.02 | 63.0%  |
| Slc6a4   | 0.00506272  | 0.01 | 140.8% |
| Slc6a5   | 24.2581     | 0.85 | 3.5%   |
| Slc6a6   | 16.17474    | 1.22 | 7.6%   |
| Slc6a7   | 3.965752    | 0.36 | 9.0%   |
| Slc6a8   | 21.65032    | 1.45 | 6.7%   |
| Slc6a9   | 11.35406    | 1.07 | 9.4%   |
| Slc7a1   | 18.01716    | 1.96 | 10.9%  |
| Slc7a10  | 0.5529588   | 0.12 | 21.4%  |
| Slc7a11  | 5.089438    | 0.46 | 9.0%   |
| Slc7a12  | 0           | 0.00 |        |
| Slc7a13  | 0           | 0.00 |        |
| Slc7a14  | 18.51448    | 1.69 | 9.1%   |
| Slc7a15  | 0           | 0.00 |        |
| Slc7a2   | 1.776216    | 0.19 | 10.4%  |
| Slc7a3   | 12.687578   | 4.16 | 32.8%  |
| Slc7a4   | 7.472322    | 0.10 | 1.3%   |
| Slc7a5   | 29.19494    | 3.00 | 10.3%  |
| Slc7a6   | 6.83175     | 0.45 | 6.5%   |
| Slc7a6os | 9.227348    | 0.35 | 3.8%   |
| Slc7a7   | 2.27728     | 0.48 | 21.2%  |
| Slc7a8   | 3.49043     | 0.48 | 13.7%  |

|          |            |      |        |
|----------|------------|------|--------|
| Slc7a9   | 0          | 0.00 |        |
| Slc8a1   | 40.83216   | 3.80 | 9.3%   |
| Slc8a2   | 20.54632   | 2.42 | 11.8%  |
| Slc8a3   | 13.62154   | 0.61 | 4.4%   |
| Slc9a1   | 14.49846   | 0.91 | 6.3%   |
| Slc9a10  | 0          | 0.00 |        |
| Slc9a2   | 0.496977   | 0.15 | 30.2%  |
| Slc9a3   | 0.03114312 | 0.02 | 59.0%  |
| Slc9a3r1 | 2.075178   | 0.24 | 11.7%  |
| Slc9a3r2 | 12.835     | 0.73 | 5.7%   |
| Slc9a4   | 0.0267017  | 0.02 | 64.1%  |
| Slc9a5   | 4.828426   | 0.31 | 6.4%   |
| Slc9a6   | 36.78184   | 1.67 | 4.5%   |
| Slc9a7   | 17.78956   | 2.07 | 11.7%  |
| Slc9a8   | 10.198948  | 0.55 | 5.4%   |
| Slc9a9   | 1.703242   | 0.13 | 7.6%   |
| Slco1a1  | 0.0025474  | 0.01 | 223.6% |
| Slco1a4  | 0.2046974  | 0.07 | 35.2%  |
| Slco1a5  | 0.03976842 | 0.02 | 58.3%  |
| Slco1a6  | 0.00377198 | 0.01 | 223.6% |
| Slco1b2  | 0.02933656 | 0.02 | 78.3%  |
| Slco1c1  | 0.07943992 | 0.03 | 35.7%  |
| Slco2a1  | 0.1813614  | 0.05 | 29.9%  |
| Slco2b1  | 0.08331052 | 0.03 | 36.7%  |
| Slco3a1  | 10.54576   | 0.56 | 5.3%   |
| Slco4a1  | 0.5927268  | 0.06 | 9.3%   |
| Slco4c1  | 0.7632502  | 0.19 | 24.7%  |
| Slco5a1  | 0.7854086  | 0.11 | 14.2%  |
| Slco6b1  | 0          | 0.00 |        |
| Slco6c1  | 0.01393286 | 0.01 | 105.8% |
| Slco6d1  | 0          | 0.00 |        |
| Sln1     | 0          | 0.00 |        |
| Sln10    | 0.00443275 | 0.01 | 138.1% |
| Sln2     | 0.01428856 | 0.01 | 59.1%  |
| Sln3     | 0          | 0.00 |        |
| Sln4     | 0          | 0.00 |        |
| Sln5     | 0          | 0.00 |        |
| Sln8     | 0.00215154 | 0.00 | 223.6% |
| Sln9     | 0.00233468 | 0.01 | 223.6% |
| Sln11    | 0.01471278 | 0.02 | 110.2% |
| Slirp    | 1.3324456  | 0.73 | 54.9%  |
| Slit1    | 11.38008   | 0.24 | 2.1%   |
| Slit2    | 10.123024  | 0.28 | 2.7%   |
| Slit3    | 1.474238   | 0.27 | 18.6%  |
| Slitrk1  | 15.58946   | 0.42 | 2.7%   |
| Slitrk2  | 4.003502   | 0.37 | 9.2%   |
| Slitrk3  | 10.110712  | 0.32 | 3.2%   |

|          |             |      |        |
|----------|-------------|------|--------|
| Slitrk4  | 13.1223     | 0.94 | 7.1%   |
| Slitrk5  | 11.5863     | 0.56 | 4.8%   |
| Slitrk6  | 0.9407436   | 0.14 | 14.4%  |
| Slk      | 10.87342    | 0.77 | 7.1%   |
| Slm1     | 0.396027    | 0.14 | 35.4%  |
| Smap     | 20.99106    | 0.95 | 4.5%   |
| Slmo1    | 16.97138    | 0.58 | 3.4%   |
| Slmo2    | 14.9691     | 0.81 | 5.4%   |
| Sln      | 0           | 0.00 |        |
| Slo      | 4.7084      | 0.95 | 20.3%  |
| Slo3     | 0.1410378   | 0.03 | 19.1%  |
| slp1     | 0.01902272  | 0.01 | 74.6%  |
| slp2-a   | 0.009608754 | 0.01 | 100.0% |
| Slpi     | 0           | 0.00 |        |
| Sltm     | 10.859112   | 0.79 | 7.2%   |
| Slu7     | 11.16436    | 0.30 | 2.7%   |
| Slurp1   | 0           | 0.00 |        |
| Sly      | 0           | 0.00 |        |
| Smad1    | 11.07352    | 0.38 | 3.4%   |
| Smad2    | 11.9098     | 0.95 | 8.0%   |
| Smad3    | 1.776714    | 0.24 | 13.3%  |
| Smad4    | 9.935822    | 0.42 | 4.3%   |
| Smad5    | 12.02462    | 1.02 | 8.5%   |
| Smad6    | 0.07089436  | 0.04 | 57.6%  |
| Smad7    | 1.391508    | 0.09 | 6.8%   |
| Smad9    | 5.177584    | 0.60 | 11.6%  |
| Smap1    | 43.03198    | 3.67 | 8.5%   |
| Smap1l   | 43.89344    | 0.79 | 1.8%   |
| Smarca1  | 10.70736    | 0.58 | 5.4%   |
| Smarca2  | 45.65092    | 2.02 | 4.4%   |
| Smarca4  | 35.8607     | 0.70 | 2.0%   |
| Smarca5  | 4.969818    | 0.12 | 2.3%   |
| Smarcad1 | 6.429996    | 0.13 | 2.0%   |
| Smarcal1 | 15.41396    | 0.71 | 4.6%   |
| Smarcb1  | 25.86778    | 2.20 | 8.5%   |
| Smarcc1  | 14.89138    | 0.47 | 3.1%   |
| Smarcc2  | 41.65764    | 1.36 | 3.3%   |
| Smarcd1  | 31.1435     | 1.10 | 3.5%   |
| Smarcd2  | 3.014922    | 0.39 | 13.0%  |
| Smarcd3  | 17.90186    | 1.00 | 5.6%   |
| Smarce1  | 5.044202    | 0.31 | 6.1%   |
| smarp    | 0.01855172  | 0.03 | 163.2% |
| Smc1a    | 14.25194    | 0.55 | 3.8%   |
| Smc1b    | 0.08763344  | 0.02 | 20.9%  |
| Smc2     | 2.038818    | 0.29 | 14.4%  |
| Smc3     | 12.78346    | 0.44 | 3.4%   |
| Smc4     | 2.951278    | 0.39 | 13.3%  |

|           |             |      |        |
|-----------|-------------|------|--------|
| SMC4      | 0.10349996  | 0.03 | 25.1%  |
| Smc5      | 7.471942    | 0.81 | 10.8%  |
| Smc6      | 12.31442    | 0.69 | 5.6%   |
| SMC6      | 0.7991118   | 0.39 | 48.7%  |
| SmcB      | 0.07322518  | 0.02 | 25.4%  |
| Smchd1    | 5.517452    | 0.40 | 7.2%   |
| Smcp      | 0           | 0.00 |        |
| Smcr7     | 6.272394    | 0.24 | 3.8%   |
| Smcr7l    | 16.22396    | 0.45 | 2.8%   |
| Smcr8     | 7.433826    | 0.46 | 6.2%   |
| Smcy      | 0.000581326 | 0.00 | 223.6% |
| Smek1     | 8.47688     | 0.46 | 5.4%   |
| Smek2     | 14.25338    | 0.83 | 5.8%   |
| Smg1      | 1.77325164  | 2.40 | 135.5% |
| Smg5      | 18.57996    | 0.82 | 4.4%   |
| Smg6      | 7.605496    | 0.90 | 11.8%  |
| Smg7      | 19.95426    | 0.23 | 1.1%   |
| Smgc      | 0           | 0.00 |        |
| SMIF      | 0.02620538  | 0.00 | 10.6%  |
| SMN       | 0.970297    | 0.60 | 61.8%  |
| Smn1      | 6.728204    | 0.94 | 13.9%  |
| Smndc1    | 10.63352    | 0.73 | 6.8%   |
| Smo       | 4.474974    | 0.50 | 11.2%  |
| Smoc1     | 4.313514    | 0.34 | 7.8%   |
| Smoc2     | 3.284958    | 1.02 | 30.9%  |
| smoc2     | 1.9700612   | 1.01 | 51.4%  |
| Smok(Tcr) | 0           | 0.00 |        |
| Smok3b    | 0           | 0.00 |        |
| Smox      | 7.556516    | 1.09 | 14.5%  |
| Smpd1     | 31.27524    | 2.07 | 6.6%   |
| Smpd2     | 1.338618    | 0.17 | 12.6%  |
| Smpd3     | 9.075684    | 1.65 | 18.2%  |
| Smpd4     | 9.023568    | 0.57 | 6.3%   |
| Smpdl3a   | 0.5906336   | 0.10 | 17.4%  |
| Smpdl3b   | 0.09035024  | 0.04 | 46.6%  |
| Smpx      | 0           | 0.00 |        |
| Smr1      | 0           | 0.00 |        |
| Smr2      | 0.01103474  | 0.02 | 223.6% |
| smrp1     | 0.157379    | 0.03 | 21.7%  |
| Smrte     | 3.735034    | 0.33 | 8.8%   |
| Sms       | 37.47654    | 1.31 | 3.5%   |
| Smt3ip2   | 0.9857706   | 0.19 | 19.6%  |
| Smtn      | 1.1658144   | 0.28 | 23.8%  |
| Smtnl1    | 0           | 0.00 |        |
| Smtnl2    | 1.649456    | 0.26 | 15.7%  |
| Smu1      | 23.38576    | 0.40 | 1.7%   |
| Smug1     | 7.408624    | 0.61 | 8.3%   |

|         |            |       |        |
|---------|------------|-------|--------|
| Smurf1  | 11.1772    | 0.44  | 4.0%   |
| Smurf2  | 6.249344   | 0.27  | 4.3%   |
| SmX5    | 1.6588984  | 0.80  | 48.4%  |
| Smyd1   | 0.2312956  | 0.03  | 14.2%  |
| Smyd2   | 34.3835    | 1.17  | 3.4%   |
| Smyd3   | 11.82052   | 1.04  | 8.8%   |
| Smyd4   | 2.524002   | 0.14  | 5.6%   |
| Smyd5   | 14.18324   | 1.17  | 8.2%   |
| Snag1   | 3.611768   | 0.28  | 7.8%   |
| Snai1   | 1.1784388  | 0.37  | 31.2%  |
| Snai2   | 0.4048822  | 0.06  | 15.6%  |
| Snai3   | 0.00782592 | 0.01  | 138.9% |
| Snap23  | 2.398246   | 0.21  | 8.8%   |
| Snap25  | 706.9992   | 37.24 | 5.3%   |
| Snap29  | 13.81612   | 1.15  | 8.3%   |
| Snap91  | 131.248    | 1.24  | 0.9%   |
| Snapap  | 20.38016   | 1.13  | 5.6%   |
| Snapc1  | 4.856684   | 0.21  | 4.2%   |
| Snapc2  | 8.541522   | 0.75  | 8.8%   |
| Snapc3  | 7.394388   | 1.23  | 16.7%  |
| Snapc4  | 6.906126   | 0.36  | 5.2%   |
| Snapc5  | 10.294362  | 0.99  | 9.6%   |
| Snca    | 65.51082   | 6.64  | 10.1%  |
| Sncaip  | 2.70405    | 0.28  | 10.4%  |
| Sncb    | 249.5244   | 14.77 | 5.9%   |
| Sncg    | 14.03992   | 1.45  | 10.3%  |
| Snd1    | 25.22702   | 1.57  | 6.2%   |
| Sned1   | 0.4613728  | 0.12  | 26.7%  |
| Snep    | 0.0339361  | 0.01  | 43.3%  |
| Snf1lk  | 3.004474   | 0.24  | 8.1%   |
| Snf1lk2 | 0.4880742  | 0.29  | 59.7%  |
| Snf2l   | 0.16529246 | 0.08  | 46.1%  |
| Snf8    | 10.25843   | 0.63  | 6.2%   |
| Snip1   | 2.883208   | 0.20  | 6.8%   |
| Snn     | 40.48944   | 2.77  | 6.9%   |
| Sno     | 0.6264174  | 0.13  | 20.5%  |
| Snph    | 24.15096   | 1.47  | 6.1%   |
| Snrk    | 20.31768   | 1.24  | 6.1%   |
| Snrp70  | 70.13074   | 5.94  | 8.5%   |
| Snrpa   | 14.95956   | 1.50  | 10.1%  |
| Snrpa1  | 10.984936  | 0.84  | 7.6%   |
| Snrpb   | 25.76134   | 1.56  | 6.1%   |
| Snrpb2  | 13.89222   | 0.96  | 6.9%   |
| Snrpc   | 3.522224   | 0.28  | 8.0%   |
| Snrpd1  | 11.19758   | 0.55  | 4.9%   |
| Snrpd2  | 21.2595    | 2.34  | 11.0%  |
| Snrpd3  | 30.15538   | 1.57  | 5.2%   |

|       |            |       |       |
|-------|------------|-------|-------|
| Snrpe | 8.344352   | 0.57  | 6.9%  |
| Snrpf | 0.6960272  | 0.36  | 51.6% |
| Snrpg | 2.474424   | 0.24  | 9.9%  |
| Snrpn | 18.55878   | 2.07  | 11.1% |
| Snta1 | 3.351776   | 0.15  | 4.4%  |
| Sntb1 | 2.076774   | 0.22  | 10.5% |
| Sntb2 | 1.371456   | 0.26  | 18.9% |
| Sntg1 | 10.534608  | 0.52  | 5.0%  |
| Sntg2 | 1.0152692  | 0.13  | 12.6% |
| Snupn | 5.832618   | 0.55  | 9.4%  |
| Snurf | 260.9588   | 10.30 | 3.9%  |
| Snw1  | 11.907     | 1.06  | 8.9%  |
| Snx1  | 17.154     | 0.50  | 2.9%  |
| Snx10 | 33.06056   | 0.52  | 1.6%  |
| Snx11 | 6.181886   | 0.59  | 9.5%  |
| Snx12 | 16.34034   | 0.69  | 4.2%  |
| Snx13 | 17.77436   | 0.79  | 4.4%  |
| Snx14 | 26.11698   | 1.33  | 5.1%  |
| Snx15 | 9.556904   | 0.75  | 7.8%  |
| Snx16 | 22.0115    | 1.75  | 7.9%  |
| Snx17 | 26.8237    | 1.97  | 7.3%  |
| Snx19 | 14.82584   | 0.62  | 4.2%  |
| Snx2  | 24.11162   | 0.83  | 3.4%  |
| Snx21 | 2.524476   | 0.35  | 13.8% |
| Snx22 | 1.262742   | 0.11  | 8.7%  |
| Snx24 | 4.693242   | 0.31  | 6.7%  |
| Snx25 | 15.44368   | 0.59  | 3.8%  |
| Snx26 | 25.21008   | 3.23  | 12.8% |
| Snx27 | 34.48358   | 1.00  | 2.9%  |
| Snx28 | 0.3188452  | 0.11  | 33.6% |
| Snx29 | 0.04101466 | 0.01  | 20.7% |
| Snx3  | 80.1066    | 5.69  | 7.1%  |
| Snx30 | 15.95952   | 0.78  | 4.9%  |
| Snx4  | 15.34492   | 1.54  | 10.0% |
| Snx5  | 19.16298   | 0.88  | 4.6%  |
| Snx6  | 18.24068   | 1.38  | 7.5%  |
| Snx7  | 3.220866   | 0.43  | 13.3% |
| Snx8  | 15.6093    | 1.17  | 7.5%  |
| Snx9  | 2.26541    | 0.21  | 9.4%  |
| Soat1 | 3.63496    | 0.47  | 12.9% |
| Soat2 | 0.10999252 | 0.05  | 48.0% |
| Sobp  | 6.317376   | 0.52  | 8.2%  |
| Socs1 | 0.7169206  | 0.17  | 24.2% |
| Socs2 | 1.68122    | 0.52  | 30.8% |
| Socs3 | 0.7937312  | 0.25  | 31.0% |
| Socs4 | 2.689916   | 0.39  | 14.7% |
| Socs5 | 15.15818   | 1.26  | 8.3%  |



|         |             |      |        |
|---------|-------------|------|--------|
| Socs6   | 2.53456     | 0.21 | 8.4%   |
| Socs7   | 9.629622    | 0.62 | 6.4%   |
| Sod1    | 37.67126    | 3.04 | 8.1%   |
| Sod2    | 56.3916     | 3.10 | 5.5%   |
| Sod3    | 1.746018    | 0.40 | 22.8%  |
| Sohlh1  | 0           | 0.00 |        |
| Sohlh2  | 0.01874582  | 0.01 | 74.9%  |
| Solh    | 8.310892    | 0.65 | 7.8%   |
| Solt    | 0.06607116  | 0.04 | 56.6%  |
| Son     | 24.63616    | 1.06 | 4.3%   |
| Sorbs1  | 16.60988    | 0.51 | 3.1%   |
| Sorbs2  | 5.905352    | 0.42 | 7.1%   |
| Sorbs3  | 1.1335042   | 0.17 | 14.7%  |
| SorCS   | 0.8213092   | 0.37 | 44.7%  |
| Sorcs1  | 8.195824    | 0.29 | 3.5%   |
| Sorcs2  | 5.753464    | 0.73 | 12.8%  |
| Sorcs3  | 12.54066    | 0.39 | 3.1%   |
| Sord    | 7.75943     | 0.56 | 7.2%   |
| Sorl1   | 7.311602    | 0.85 | 11.6%  |
| Sort1   | 25.62196    | 0.39 | 1.5%   |
| Sos1    | 15.7424     | 0.76 | 4.9%   |
| Sos2    | 9.305812    | 0.35 | 3.7%   |
| Sost    | 0.0243475   | 0.04 | 156.4% |
| Sostdc1 | 1.636576    | 0.35 | 21.3%  |
| Sox1    | 0.527763    | 0.14 | 27.4%  |
| Sox10   | 1.5867      | 0.53 | 33.6%  |
| Sox11   | 7.88428     | 0.32 | 4.0%   |
| Sox12   | 4.952982    | 0.42 | 8.6%   |
| Sox13   | 0.4098234   | 0.12 | 30.3%  |
| sox-13  | 0.2826776   | 0.12 | 44.1%  |
| Sox15   | 0.19855248  | 0.07 | 35.3%  |
| Sox17   | 0.7954558   | 0.22 | 28.1%  |
| Sox18   | 0.14773426  | 0.08 | 55.0%  |
| Sox2    | 4.292308    | 0.51 | 11.8%  |
| Sox21   | 2.130438    | 0.29 | 13.8%  |
| Sox3    | 0.9805572   | 0.15 | 15.2%  |
| Sox30   | 0.022136582 | 0.02 | 94.8%  |
| Sox4    | 14.31274    | 0.17 | 1.2%   |
| Sox5    | 0.533016    | 0.08 | 14.8%  |
| Sox6    | 2.550702    | 0.05 | 2.1%   |
| Sox7    | 0.09938638  | 0.03 | 32.8%  |
| Sox8    | 2.536144    | 0.28 | 11.2%  |
| Sox9    | 2.928194    | 0.37 | 12.6%  |
| SP1     | 5.919352    | 0.90 | 15.1%  |
| Sp1     | 4.541562    | 0.18 | 4.0%   |
| Sp100   | 0.00368766  | 0.01 | 223.6% |
| Sp110   | 0           | 0.00 |        |

|          |             |       |        |
|----------|-------------|-------|--------|
| Sp140    | 0.0137502   | 0.01  | 91.8%  |
| Sp2      | 2.282884    | 0.16  | 7.0%   |
| Sp3      | 10.318414   | 0.54  | 5.2%   |
| Sp4      | 3.533694    | 0.32  | 9.0%   |
| Sp5      | 0.0192973   | 0.02  | 103.6% |
| Sp6      | 0.1671154   | 0.02  | 9.5%   |
| Sp7      | 0.0022464   | 0.01  | 223.6% |
| Sp8      | 0.05859352  | 0.02  | 34.1%  |
| Sp9      | 0.10290596  | 0.04  | 35.3%  |
| Spa17    | 1.77759     | 0.13  | 7.5%   |
| Spaca1   | 0           | 0.00  |        |
| Spaca3   | 0.0157142   | 0.02  | 139.4% |
| Spaca4   | 0           | 0.00  |        |
| Spaca5   | 0.01225892  | 0.03  | 223.6% |
| Spag1    | 2.820212    | 0.41  | 14.6%  |
| Spag11   | 0           | 0.00  |        |
| Spag16   | 0.00921256  | 0.02  | 223.6% |
| Spag17   | 0.0064112   | 0.01  | 83.3%  |
| Spag4    | 1.0751518   | 0.07  | 6.4%   |
| Spag4l   | 0.00419794  | 0.01  | 223.6% |
| Spag5    | 0.8396494   | 0.15  | 17.9%  |
| Spag6    | 1.415258    | 0.18  | 12.5%  |
| Spag7    | 25.1565     | 1.65  | 6.6%   |
| Spag8    | 0.2010818   | 0.05  | 24.9%  |
| Spag9    | 51.11486    | 1.94  | 3.8%   |
| Spam1    | 0           | 0.00  |        |
| Sparc    | 90.92488    | 13.10 | 14.4%  |
| Sparcl1  | 131.3782    | 10.31 | 7.8%   |
| Spast    | 16.99416    | 1.01  | 5.9%   |
| Spata1   | 0.5133872   | 0.10  | 18.9%  |
| Spata13  | 0.2086662   | 0.09  | 44.1%  |
| Spata16  | 0           | 0.00  |        |
| Spata17  | 0.06138684  | 0.05  | 88.9%  |
| Spata18  | 0           | 0.00  |        |
| Spata19  | 0.0795871   | 0.05  | 67.8%  |
| Spata2   | 11.14676    | 0.69  | 6.2%   |
| Spata20  | 0.02078172  | 0.02  | 76.8%  |
| Spata21  | 0.010848238 | 0.01  | 92.5%  |
| Spata22  | 0.03987146  | 0.03  | 69.6%  |
| Spata2L  | 2.854884    | 0.28  | 9.7%   |
| Spata3   | 0.00499616  | 0.01  | 223.6% |
| Spata4   | 0           | 0.00  |        |
| Spata5   | 5.575676    | 0.53  | 9.5%   |
| Spata5l1 | 1.226646    | 0.13  | 10.5%  |
| Spata6   | 3.693014    | 0.34  | 9.2%   |
| Spata7   | 7.148546    | 0.48  | 6.8%   |
| Spata9   | 1.718542    | 0.28  | 16.1%  |

|            |             |      |        |
|------------|-------------|------|--------|
| Spatc1     | 0           | 0.00 |        |
| Spatial    | 0           | 0.00 |        |
| Spats1     | 1.0688904   | 0.20 | 18.7%  |
| Spats2     | 12.16368    | 0.68 | 5.6%   |
| Spsc25     | 1.548102    | 0.21 | 13.6%  |
| Spc24      | 0.8503016   | 0.09 | 11.1%  |
| Spc25      | 0.2729568   | 0.13 | 46.6%  |
| Spcs1      | 56.25104    | 3.76 | 6.7%   |
| Spcs2      | 21.94444    | 1.02 | 4.6%   |
| Spcs3      | 44.29044    | 3.47 | 7.8%   |
| Spdef      | 0.1555601   | 0.05 | 34.7%  |
| Spdya      | 2.6553246   | 2.14 | 80.4%  |
| Spdyb      | 0.01605466  | 0.02 | 116.8% |
| Specc1     | 5.283828    | 1.10 | 20.9%  |
| Specc1l    | 8.148146    | 0.24 | 3.0%   |
| Speer2     | 0           | 0.00 |        |
| Speer3     | 0           | 0.00 |        |
| Speer4a    | 0.02788666  | 0.01 | 50.6%  |
| Speer4b    | 0.09909284  | 0.05 | 50.8%  |
| Speer4c    | 0           | 0.00 |        |
| Speer4d    | 0           | 0.00 |        |
| Speer4f    | 0           | 0.00 |        |
| Speer6-ps1 | 0           | 0.00 |        |
| Spef1      | 2.302228    | 0.27 | 11.6%  |
| Spef2      | 0.05743946  | 0.02 | 27.6%  |
| Speg       | 5.225044    | 0.28 | 5.4%   |
| Spem1      | 0.1637608   | 0.07 | 41.2%  |
| Spem       | 6.043434    | 0.24 | 3.9%   |
| Spert      | 0           | 0.00 |        |
| Spesp1     | 0.007344748 | 0.01 | 94.7%  |
| Spg20      | 4.139666    | 0.35 | 8.5%   |
| Spg21      | 9.928676    | 0.43 | 4.4%   |
| Spg3a      | 45.30018    | 1.39 | 3.1%   |
| Spg7       | 20.20866    | 0.25 | 1.2%   |
| Sphk1      | 0.5326004   | 0.11 | 21.5%  |
| SPHK1a     | 0.05426504  | 0.03 | 47.2%  |
| Sphk2      | 6.397908    | 0.40 | 6.3%   |
| Spib       | 0.00291768  | 0.01 | 223.6% |
| Spic       | 0           | 0.00 |        |
| Spin1      | 67.27674    | 2.21 | 3.3%   |
| Spin2      | 4.086348    | 0.44 | 10.8%  |
| Spin4      | 0.6542008   | 0.10 | 14.7%  |
| Spink10    | 3.002414    | 0.68 | 22.6%  |
| Spink11    | 0           | 0.00 |        |
| Spink12    | 0           | 0.00 |        |
| Spink2     | 0.02732504  | 0.04 | 139.1% |
| Spink3     | 0.4677086   | 0.19 | 40.5%  |

|         |             |      |        |
|---------|-------------|------|--------|
| Spink4  | 0.18423954  | 0.11 | 57.6%  |
| Spink5  | 0.003309992 | 0.00 | 138.8% |
| Spink7  | 0           | 0.00 |        |
| Spink8  | 0.01945468  | 0.02 | 97.0%  |
| Spinlw1 | 0           | 0.00 |        |
| Spint1  | 0.420641    | 0.09 | 21.2%  |
| Spint2  | 9.241384    | 0.86 | 9.4%   |
| Spint4  | 0           | 0.00 |        |
| Spire1  | 19.79062    | 0.62 | 3.1%   |
| Spire2  | 11.92414    | 0.64 | 5.4%   |
| Spn     | 0.003646742 | 0.01 | 138.6% |
| Spna1   | 0.026116616 | 0.01 | 50.3%  |
| Spna2   | 145.6314    | 3.48 | 2.4%   |
| Spnb1   | 10.187686   | 0.33 | 3.2%   |
| Spnb2   | 112.3522    | 3.75 | 3.3%   |
| Spnb3   | 27.5221     | 1.42 | 5.2%   |
| Spnb4   | 17.2452     | 2.86 | 16.6%  |
| Spns1   | 27.03534    | 1.51 | 5.6%   |
| Spns3   | 0.01526314  | 0.01 | 94.6%  |
| Spo11   | 0.00357792  | 0.01 | 223.6% |
| Spock1  | 75.7922     | 2.13 | 2.8%   |
| Spock2  | 139.3038    | 7.54 | 5.4%   |
| Spock3  | 53.00884    | 1.65 | 3.1%   |
| Spon1   | 16.97456    | 1.45 | 8.6%   |
| Spon2   | 0.05920096  | 0.02 | 31.6%  |
| Spop    | 39.25658    | 0.70 | 1.8%   |
| Spp1    | 1.2274184   | 0.28 | 22.7%  |
| Spp2    | 0           | 0.00 |        |
| Sppl2b  | 4.749188    | 0.79 | 16.6%  |
| Sppl3   | 38.9619     | 2.90 | 7.4%   |
| Spr     | 7.560788    | 0.11 | 1.5%   |
| Spred1  | 27.60474    | 4.20 | 15.2%  |
| Spred2  | 22.1629     | 1.07 | 4.8%   |
| Spred-2 | 0.09591938  | 0.04 | 39.1%  |
| Spred3  | 9.327006    | 1.07 | 11.5%  |
| Spred-3 | 0.24141252  | 0.09 | 36.5%  |
| Sprn    | 2.952024    | 0.15 | 5.1%   |
| Sprr1a  | 0.22415994  | 0.12 | 52.0%  |
| Sprr1b  | 0           | 0.00 |        |
| Sprr2a  | 0           | 0.00 |        |
| Sprr2b  | 0           | 0.00 |        |
| Sprr2d  | 0           | 0.00 |        |
| Sprr2e  | 0           | 0.00 |        |
| Sprr2f  | 0           | 0.00 |        |
| Sprr2g  | 0           | 0.00 |        |
| Sprr2h  | 0           | 0.00 |        |
| SPRR2H  | 0           | 0.00 |        |

|          |             |       |        |
|----------|-------------|-------|--------|
| Sprr2i   | 0           | 0.00  |        |
| Sprr2j   | 0           | 0.00  |        |
| Sprr2k   | 0           | 0.00  |        |
| Sprr3    | 0           | 0.00  |        |
| Sprr4    | 0           | 0.00  |        |
| Spry1    | 7.797362    | 1.16  | 14.9%  |
| Spry2    | 11.210348   | 1.39  | 12.4%  |
| Spry3    | 0           | 0.00  |        |
| Spry4    | 10.457      | 0.17  | 1.6%   |
| Spryd3   | 86.05726    | 3.63  | 4.2%   |
| Spryd4   | 4.310928    | 0.41  | 9.6%   |
| Spsb1    | 1.540904    | 0.20  | 13.0%  |
| Spsb2    | 1.295618    | 0.15  | 11.4%  |
| Spsb3    | 20.47916    | 5.42  | 26.5%  |
| Spsb4    | 3.36084     | 0.53  | 15.9%  |
| Spt1     | 0           | 0.00  |        |
| Spt2     | 0           | 0.00  |        |
| Sptlc1   | 7.70214     | 0.31  | 4.1%   |
| Sptlc2   | 11.43478    | 0.67  | 5.8%   |
| Sptlc3   | 0.01537224  | 0.02  | 146.7% |
| Spty2d1  | 3.59621     | 0.18  | 5.0%   |
| Spz1     | 0           | 0.00  |        |
| Sqle     | 108.72824   | 17.40 | 16.0%  |
| Sqrdl    | 0.5693888   | 0.10  | 16.7%  |
| Sqstm1   | 218.3232    | 4.28  | 2.0%   |
| sr528    | 14.6614     | 0.52  | 3.5%   |
| Sra1     | 15.12814    | 1.21  | 8.0%   |
| Srbd1    | 2.074076    | 0.20  | 9.7%   |
| Src      | 13.55078    | 0.33  | 2.5%   |
| Srcrb4d  | 0.4629964   | 0.05  | 9.8%   |
| Srd5a1   | 4.609578    | 1.13  | 24.5%  |
| Srd5a2   | 0.13467036  | 0.08  | 58.9%  |
| Srd5a2l  | 6.486954    | 0.48  | 7.4%   |
| Srd5a2l2 | 0.04394868  | 0.01  | 32.3%  |
| Srebf1   | 12.36232    | 1.69  | 13.7%  |
| Srebf2   | 74.92268    | 9.26  | 12.4%  |
| Srf      | 3.921132    | 0.19  | 4.9%   |
| Srfbp1   | 4.89099     | 0.24  | 4.9%   |
| Srgap1   | 4.027926    | 0.49  | 12.0%  |
| Srgap2   | 17.34898    | 0.51  | 2.9%   |
| Srgap3   | 39.61746    | 1.24  | 3.1%   |
| Srgn     | 4.57158     | 1.79  | 39.1%  |
| Sri      | 16.1837     | 0.32  | 2.0%   |
| Srl      | 2.414052    | 0.25  | 10.6%  |
| Srm      | 15.9492     | 1.93  | 12.1%  |
| Srms     | 0.007088426 | 0.01  | 94.8%  |
| Srp14    | 57.24654    | 3.54  | 6.2%   |

|        |             |      |        |
|--------|-------------|------|--------|
| Srp19  | 23.28908    | 2.26 | 9.7%   |
| Srp54a | 0.232621846 | 0.32 | 137.7% |
| Srp54b | 0.25913328  | 0.31 | 121.2% |
| Srp54c | 16.88118    | 0.52 | 3.1%   |
| Srp68  | 23.6782     | 0.68 | 2.9%   |
| Srp72  | 34.14074    | 1.43 | 4.2%   |
| Srp9   | 27.14122    | 0.71 | 2.6%   |
| Srpk1  | 10.924552   | 0.72 | 6.6%   |
| SRPK1  | 2.569954    | 1.02 | 39.9%  |
| Srpk2  | 44.70708    | 1.36 | 3.0%   |
| Srpk3  | 0.06014094  | 0.04 | 64.9%  |
| Srpr   | 19.14738    | 0.99 | 5.2%   |
| Srprb  | 13.6795     | 0.67 | 4.9%   |
| Srpx   | 1.660656    | 0.36 | 21.4%  |
| Srpx2  | 1.2078478   | 0.22 | 18.0%  |
| Srr    | 28.99732    | 1.23 | 4.3%   |
| Srrm1  | 27.4349     | 1.23 | 4.5%   |
| Srrm2  | 46.10144    | 4.25 | 9.2%   |
| Srrp   | 16.82736    | 0.95 | 5.6%   |
| Srxn1  | 28.37002    | 0.72 | 2.5%   |
| Ss18   | 2.819548    | 0.30 | 10.6%  |
| Ss18l1 | 19.48358    | 0.97 | 5.0%   |
| Ssb    | 58.15984    | 2.71 | 4.7%   |
| Ssbp1  | 4.362722    | 0.37 | 8.6%   |
| Ssbp2  | 11.13568    | 0.58 | 5.3%   |
| Ssbp3  | 26.30582    | 1.55 | 5.9%   |
| Ssbp4  | 21.5626     | 0.92 | 4.3%   |
| Ssfa2  | 2.649724    | 0.27 | 10.2%  |
| Ssh1   | 2.61596     | 0.18 | 7.0%   |
| Ssh2   | 4.881602    | 0.36 | 7.3%   |
| Ssh3   | 7.390452    | 0.62 | 8.4%   |
| Ssna1  | 14.23694    | 0.85 | 6.0%   |
| Sspn   | 1.540182    | 0.08 | 5.2%   |
| Ssr1   | 47.91536    | 1.68 | 3.5%   |
| Ssr2   | 49.75378    | 3.77 | 7.6%   |
| Ssr3   | 63.04384    | 4.10 | 6.5%   |
| Ssr4   | 29.93212    | 2.67 | 8.9%   |
| Ssrp1  | 23.20428    | 0.61 | 2.6%   |
| Sssca1 | 16.2938     | 1.83 | 11.2%  |
| Sst    | 29.39772    | 4.70 | 16.0%  |
| Sstr1  | 14.12698    | 0.63 | 4.4%   |
| Sstr2  | 2.919584    | 0.31 | 10.5%  |
| Sstr3  | 0.373493    | 0.05 | 12.8%  |
| Sstr4  | 0.6302732   | 0.16 | 24.6%  |
| Sstr5  | 0.00477514  | 0.01 | 137.0% |
| Ssty1  | 0           | 0.00 |        |
| Ssty2  | 0           | 0.00 |        |

|              |             |      |        |
|--------------|-------------|------|--------|
| Ssu72        | 34.90142    | 2.88 | 8.3%   |
| Ssx2ip       | 22.80348    | 0.76 | 3.3%   |
| Ssx9         | 0           | 0.00 |        |
| Ssxa1        | 0.01434084  | 0.03 | 223.6% |
| Ssxb1        | 0           | 0.00 |        |
| Ssxb10       | 0           | 0.00 |        |
| Ssxb2        | 0           | 0.00 |        |
| Ssxb3        | 0           | 0.00 |        |
| Ssxb5        | 0           | 0.00 |        |
| Ssxb9        | 0           | 0.00 |        |
| St13         | 91.0912     | 1.50 | 1.6%   |
| St14         | 0.1614442   | 0.03 | 16.8%  |
| St18         | 0.08950192  | 0.02 | 21.4%  |
| St3gal1      | 9.363624    | 0.61 | 6.5%   |
| St3gal2      | 13.88462    | 0.50 | 3.6%   |
| St3gal3      | 13.40418    | 0.66 | 4.9%   |
| St3gal4      | 3.924798    | 0.13 | 3.4%   |
| St3gal5      | 18.57128    | 0.67 | 3.6%   |
| St3gal6      | 2.33511     | 0.37 | 15.8%  |
| St5          | 3.385462    | 0.31 | 9.0%   |
| St6gal1      | 1.581572    | 0.14 | 8.8%   |
| St6gal2      | 1.999514    | 0.09 | 4.4%   |
| ST6GalNAc_VI | 9.607268    | 0.42 | 4.4%   |
| St6galnac1   | 0           | 0.00 |        |
| St6galnac2   | 0.06955974  | 0.05 | 66.2%  |
| St6galnac3   | 2.475014    | 0.21 | 8.4%   |
| St6galnac4   | 6.928694    | 0.25 | 3.6%   |
| St6galnac5   | 6.785518    | 0.46 | 6.7%   |
| St6galnac6   | 15.6823     | 1.62 | 10.4%  |
| St7          | 7.304232    | 0.52 | 7.1%   |
| St7I         | 7.18144     | 0.24 | 3.3%   |
| St8sia1      | 12.68302    | 0.43 | 3.4%   |
| St8sia2      | 5.32002     | 0.40 | 7.5%   |
| St8sia3      | 24.93602    | 0.81 | 3.2%   |
| St8sia4      | 8.981962    | 0.54 | 6.0%   |
| St8sia5      | 6.710706    | 0.61 | 9.1%   |
| St8sia6      | 1.697428    | 0.22 | 12.7%  |
| ST8SialV     | 0.1895488   | 0.05 | 25.3%  |
| Stab1        | 0.41514118  | 0.50 | 121.5% |
| Stab2        | 0.024010974 | 0.01 | 57.6%  |
| Stac         | 1.473802    | 0.45 | 30.2%  |
| Stac2        | 12.10386    | 1.39 | 11.5%  |
| Stac3        | 0.3780668   | 0.15 | 38.7%  |
| Stag1        | 7.379434    | 0.08 | 1.1%   |
| Stag2        | 13.50984    | 0.44 | 3.3%   |
| Stag3        | 2.902354    | 0.25 | 8.6%   |
| Stam         | 25.11228    | 0.98 | 3.9%   |

|          |             |       |        |
|----------|-------------|-------|--------|
| Stam2    | 8.442646    | 0.80  | 9.4%   |
| Stambp   | 15.28366    | 1.23  | 8.0%   |
| Stambpl1 | 7.618454    | 0.51  | 6.7%   |
| Stap1    | 0           | 0.00  |        |
| stap-1   | 0.00306186  | 0.01  | 223.6% |
| Stap2    | 0.3101904   | 0.07  | 24.1%  |
| Star     | 1.92836     | 0.13  | 6.6%   |
| Stard10  | 15.13456    | 1.61  | 10.7%  |
| Stard13  | 1.45216     | 0.22  | 15.5%  |
| Stard3   | 4.976398    | 0.31  | 6.2%   |
| Stard3nl | 36.83536    | 1.33  | 3.6%   |
| Stard4   | 26.53836    | 0.76  | 2.9%   |
| Stard5   | 3.337146    | 0.29  | 8.6%   |
| Stard6   | 0.0423001   | 0.03  | 73.9%  |
| Stard7   | 31.16988    | 0.74  | 2.4%   |
| Stard8   | 0.4623298   | 0.04  | 8.2%   |
| Stard9   | 0.4172284   | 0.18  | 42.3%  |
| Stat1    | 5.602708    | 0.32  | 5.7%   |
| Stat2    | 6.264508    | 0.31  | 5.0%   |
| Stat3    | 14.2895     | 0.51  | 3.6%   |
| Stat4    | 0.019692132 | 0.02  | 92.3%  |
| Stat5a   | 0.516961    | 0.05  | 9.8%   |
| Stat5A   | 0.008311678 | 0.00  | 33.2%  |
| Stat5b   | 7.186688    | 0.32  | 4.4%   |
| Stat6    | 0.10730482  | 0.02  | 17.5%  |
| Stau1    | 12.58446    | 11.58 | 92.1%  |
| Stau2    | 72.30674    | 1.54  | 2.1%   |
| Stbd1    | 1.2144912   | 0.21  | 17.5%  |
| Stc1     | 6.727796    | 0.87  | 13.0%  |
| Stc2     | 2.547554    | 0.62  | 24.3%  |
| Stch     | 23.45124    | 0.81  | 3.5%   |
| Steap1   | 0.369227    | 0.11  | 30.9%  |
| Steap2   | 7.188288    | 0.90  | 12.5%  |
| Steap3   | 0.611147    | 0.11  | 17.5%  |
| Steap4   | 1.0775864   | 0.35  | 32.8%  |
| Stef     | 0.0370572   | 0.02  | 62.4%  |
| Stfa1    | 0           | 0.00  |        |
| Stfa2    | 0           | 0.00  |        |
| Stfa211  | 0           | 0.00  |        |
| Stfa3    | 0           | 0.00  |        |
| Stil     | 0.3238312   | 0.07  | 21.2%  |
| Stim1    | 17.8721     | 0.98  | 5.5%   |
| Stim2    | 8.344824    | 0.23  | 2.7%   |
| Stip1    | 88.46684    | 1.77  | 2.0%   |
| Stk10    | 0.6393682   | 0.11  | 17.0%  |
| Stk11    | 21.06462    | 1.09  | 5.2%   |
| Stk11ip  | 5.278954    | 0.19  | 3.5%   |



|         |             |       |        |
|---------|-------------|-------|--------|
| Stk16   | 11.88896    | 0.66  | 5.5%   |
| Stk17b  | 1.1333144   | 0.15  | 13.4%  |
| Stk19   | 4.616718    | 0.38  | 8.3%   |
| Stk22s1 | 0.02611778  | 0.01  | 34.2%  |
| Stk24   | 18.43282    | 0.90  | 4.9%   |
| Stk25   | 50.9115     | 0.97  | 1.9%   |
| Stk3    | 6.223352    | 0.16  | 2.6%   |
| Stk31   | 0.05055698  | 0.02  | 40.9%  |
| Stk32a  | 1.1535642   | 0.10  | 9.0%   |
| Stk32b  | 13.50778    | 2.54  | 18.8%  |
| Stk32c  | 10.087216   | 0.29  | 2.9%   |
| Stk33   | 0.3561692   | 0.13  | 36.2%  |
| Stk35   | 4.22338     | 0.23  | 5.5%   |
| Stk36   | 1.50186     | 0.16  | 10.6%  |
| Stk38   | 5.406066    | 0.46  | 8.5%   |
| Stk38l  | 2.512446    | 0.10  | 4.1%   |
| Stk39   | 27.9646     | 1.62  | 5.8%   |
| Stk4    | 6.4238      | 0.35  | 5.5%   |
| Stk40   | 7.355898    | 0.30  | 4.0%   |
| Stmn1   | 10.506192   | 1.80  | 17.1%  |
| Stmn2   | 398.1574    | 37.09 | 9.3%   |
| Stmn3   | 453.6074    | 37.43 | 8.3%   |
| Stmn4   | 53.47852    | 6.64  | 12.4%  |
| Stom    | 3.096348    | 0.21  | 6.8%   |
| Stoml1  | 22.30966    | 0.48  | 2.2%   |
| Stoml2  | 10.87152    | 0.35  | 3.2%   |
| Stoml3  | 0.00530688  | 0.01  | 223.6% |
| Ston2   | 1.0274986   | 0.06  | 5.9%   |
| Stox2   | 17.0481     | 1.87  | 11.0%  |
| Stra13  | 9.343788    | 1.18  | 12.6%  |
| Stra6   | 1.769092    | 0.45  | 25.6%  |
| Stra8   | 0.00288262  | 0.01  | 223.6% |
| Strap   | 67.43212    | 1.28  | 1.9%   |
| Strbp   | 25.78574    | 1.08  | 4.2%   |
| Strc    | 0.029986972 | 0.03  | 101.3% |
| Strn    | 8.008848    | 0.73  | 9.1%   |
| Strn3   | 17.34354    | 0.42  | 2.4%   |
| Strn4   | 27.67044    | 0.86  | 3.1%   |
| Stt3a   | 29.26122    | 1.15  | 3.9%   |
| Stt3b   | 33.4198     | 2.57  | 7.7%   |
| Stub1   | 51.43798    | 2.12  | 4.1%   |
| Stx11   | 0.10938086  | 0.04  | 38.5%  |
| Stx12   | 50.47376    | 1.35  | 2.7%   |
| Stx16   | 13.16784    | 1.59  | 12.1%  |
| Stx17   | 8.935652    | 0.18  | 2.1%   |
| Stx18   | 10.74362    | 0.42  | 4.0%   |
| Stx19   | 0.01075814  | 0.02  | 140.5% |

|         |            |       |        |
|---------|------------|-------|--------|
| Stx1a   | 16.5539    | 1.95  | 11.8%  |
| Stx1b2  | 137.9928   | 6.66  | 4.8%   |
| Stx2    | 2.26214    | 0.18  | 8.0%   |
| Stx3    | 6.236902   | 0.41  | 6.6%   |
| Stx4a   | 8.168714   | 0.60  | 7.4%   |
| Stx5    | 12.61652   | 0.90  | 7.2%   |
| Stx5a   | 11.101046  | 0.93  | 8.4%   |
| Stx6    | 13.87332   | 0.66  | 4.8%   |
| Stx7    | 77.96604   | 5.72  | 7.3%   |
| Stx8    | 5.282314   | 0.37  | 7.0%   |
| Stxbp1  | 368.7822   | 13.20 | 3.6%   |
| Stxbp2  | 2.451412   | 0.32  | 13.2%  |
| Stxbp3a | 1.273108   | 0.15  | 11.5%  |
| Stxbp3b | 0.7298708  | 0.12  | 16.0%  |
| Stxbp4  | 2.98174    | 0.36  | 12.1%  |
| Stxbp5  | 18.8195    | 0.54  | 2.9%   |
| Stxbp5l | 7.796934   | 1.53  | 19.6%  |
| Stxbp6  | 23.55128   | 0.53  | 2.2%   |
| Styk1   | 0.3085272  | 0.08  | 26.6%  |
| Styx    | 0.305707   | 0.10  | 34.0%  |
| Styxl1  | 0.05337634 | 0.08  | 141.7% |
| Sub1    | 40.02364   | 3.48  | 8.7%   |
| Sucla1  | 0.03515402 | 0.01  | 29.7%  |
| Sucla2  | 93.50432   | 4.86  | 5.2%   |
| Suclg1  | 57.53332   | 2.56  | 4.4%   |
| Suclg2  | 1.271418   | 0.10  | 8.2%   |
| Sucnr1  | 0.01628672 | 0.03  | 158.3% |
| Suds3   | 21.51614   | 1.17  | 5.4%   |
| Sufu    | 2.968296   | 0.15  | 5.1%   |
| Sugt1   | 21.6278    | 1.28  | 5.9%   |
| Suhw3   | 0.3270626  | 0.14  | 44.1%  |
| Suhw4   | 8.975254   | 0.66  | 7.3%   |
| Sulf1   | 2.878136   | 0.22  | 7.7%   |
| Sulf2   | 26.38954   | 2.27  | 8.6%   |
| Sult1a1 | 1.053537   | 0.29  | 27.6%  |
| Sult1b1 | 0          | 0.00  |        |
| Sult1c1 | 0          | 0.00  |        |
| Sult1c2 | 0.05386734 | 0.02  | 32.5%  |
| Sult1d1 | 0.00775988 | 0.01  | 137.2% |
| Sult1e1 | 0          | 0.00  |        |
| Sult2b1 | 0.00415982 | 0.01  | 223.6% |
| Sult3a1 | 0          | 0.00  |        |
| Sult4a1 | 158.0354   | 7.14  | 4.5%   |
| Sult5a1 | 0.12521762 | 0.04  | 34.6%  |
| Sumf1   | 8.402208   | 0.52  | 6.1%   |
| Sumf2   | 6.136006   | 0.57  | 9.3%   |
| Sumo1   | 20.98736   | 0.66  | 3.2%   |

|          |            |      |        |
|----------|------------|------|--------|
| Sumo2    | 0.08730908 | 0.04 | 48.2%  |
| Sumo3    | 34.3261    | 1.49 | 4.3%   |
| Sunc1    | 0.5083744  | 0.07 | 13.0%  |
| Suox     | 3.188906   | 0.29 | 9.1%   |
| Supl15h  | 2.012216   | 0.67 | 33.2%  |
| Supt16h  | 18.43136   | 0.72 | 3.9%   |
| Supt3h   | 11.63772   | 1.23 | 10.6%  |
| Supt4h1  | 1.5668302  | 0.41 | 26.1%  |
| Supt4h2  | 7.838964   | 0.55 | 7.0%   |
| Supt5h   | 33.65338   | 0.80 | 2.4%   |
| Supt6h   | 21.49258   | 0.81 | 3.8%   |
| Supt7l   | 6.400214   | 0.46 | 7.2%   |
| Supv3l1  | 8.36682    | 0.50 | 6.0%   |
| Sur2     | 1.1005332  | 0.52 | 47.7%  |
| Surf1    | 30.0839    | 1.27 | 4.2%   |
| Surf2    | 14.98956   | 4.03 | 26.9%  |
| Surf4    | 26.10412   | 2.01 | 7.7%   |
| Surf6    | 6.485758   | 0.22 | 3.3%   |
| Susd2    | 7.020436   | 0.79 | 11.3%  |
| Susd3    | 0.00791444 | 0.01 | 138.9% |
| Susd4    | 40.01998   | 1.12 | 2.8%   |
| Suv39h1  | 8.612998   | 1.40 | 16.2%  |
| Suv39h2  | 0.4743762  | 0.07 | 14.7%  |
| Suv420h1 | 10.64052   | 0.39 | 3.7%   |
| Suv420h2 | 7.036636   | 0.45 | 6.4%   |
| Suz12    | 8.930564   | 0.53 | 5.9%   |
| Sv2a     | 145.4704   | 4.15 | 2.9%   |
| Sv2b     | 14.71162   | 0.20 | 1.4%   |
| Sv2c     | 24.58828   | 0.67 | 2.7%   |
| Sva      | 0          | 0.00 |        |
| Sva1     | 0          | 0.00 |        |
| Sva2     | 0          | 0.00 |        |
| Sva3     | 0          | 0.00 |        |
| svct2    | 0.4504212  | 0.22 | 48.7%  |
| Svep1    | 2.185076   | 0.61 | 28.1%  |
| Svil     | 6.053976   | 0.75 | 12.4%  |
| Svop     | 41.30576   | 1.38 | 3.3%   |
| Svopl    | 0.04471512 | 0.03 | 66.2%  |
| Svs1     | 0          | 0.00 |        |
| Svs2     | 0          | 0.00 |        |
| Svs3a    | 0.00484608 | 0.01 | 223.6% |
| Svs3b    | 0          | 0.00 |        |
| Svs4     | 0          | 0.00 |        |
| Svs5     | 0          | 0.00 |        |
| Svs6     | 0          | 0.00 |        |
| Svs7     | 0.0553664  | 0.08 | 137.0% |
| Swap70   | 1.593314   | 0.10 | 6.2%   |

|          |            |      |        |
|----------|------------|------|--------|
| Syap1    | 11.41134   | 0.46 | 4.0%   |
| Sybl1    | 0          | 0.00 |        |
| Syce1    | 0.193164   | 0.05 | 23.6%  |
| Syce2    | 2.062402   | 0.21 | 10.2%  |
| Sycn     | 0          | 0.00 |        |
| Sycp1    | 0.4242042  | 0.07 | 16.6%  |
| Sycp2    | 0.2327174  | 0.07 | 30.1%  |
| Sycp3    | 4.388682   | 0.85 | 19.3%  |
| Syde1    | 2.258358   | 0.34 | 15.0%  |
| Syde2    | 0.7249822  | 0.08 | 10.8%  |
| Syf2     | 10.254968  | 0.48 | 4.7%   |
| Syk      | 0.1436594  | 0.04 | 28.8%  |
| Sympk    | 20.10112   | 0.41 | 2.0%   |
| Syn1     | 140.7648   | 7.37 | 5.2%   |
| Syn2     | 109.52746  | 7.58 | 6.9%   |
| Syn3     | 12.37332   | 1.39 | 11.2%  |
| Sync     | 3.651292   | 1.33 | 36.4%  |
| Syncrip  | 19.4243    | 1.17 | 6.0%   |
| Syne1    | 8.547792   | 0.31 | 3.6%   |
| Syne2    | 1.797798   | 0.16 | 8.7%   |
| Syngr1   | 150.5436   | 7.83 | 5.2%   |
| Syngr2   | 1.87301    | 0.38 | 20.5%  |
| Syngr3   | 128.5664   | 5.07 | 3.9%   |
| Syngr4   | 0.03597854 | 0.03 | 95.2%  |
| Synj1    | 48.23858   | 2.11 | 4.4%   |
| Synj2    | 1.963838   | 0.24 | 12.3%  |
| Synj2bp  | 21.23816   | 2.02 | 9.5%   |
| Synpo    | 2.320354   | 0.36 | 15.3%  |
| Synpo2l  | 0.09094956 | 0.03 | 36.4%  |
| Synpr    | 16.04598   | 0.58 | 3.6%   |
| Syp      | 413.217    | 4.65 | 1.1%   |
| Sypl     | 8.600524   | 0.35 | 4.0%   |
| Sypl2    | 0.02763568 | 0.02 | 68.3%  |
| Sys1     | 8.938042   | 0.81 | 9.0%   |
| syt_II   | 9.05018    | 1.88 | 20.8%  |
| syt_XV-a | 0.0113659  | 0.03 | 223.6% |
| Syt1     | 122.8554   | 4.10 | 3.3%   |
| Syt10    | 0.4298022  | 0.13 | 29.8%  |
| Syt11    | 140.9614   | 3.05 | 2.2%   |
| Syt12    | 14.8733    | 0.33 | 2.2%   |
| Syt13    | 26.2365    | 0.96 | 3.7%   |
| Syt14    | 1.555946   | 0.17 | 11.2%  |
| Syt15    | 0.0290545  | 0.02 | 81.9%  |
| Syt16    | 16.66398   | 1.66 | 10.0%  |
| Syt17    | 6.655648   | 0.44 | 6.7%   |
| Syt2     | 58.58404   | 6.23 | 10.6%  |
| Syt3     | 34.08048   | 2.19 | 6.4%   |

|         |            |      |        |
|---------|------------|------|--------|
| Syt4    | 60.20982   | 2.18 | 3.6%   |
| Syt5    | 12.29398   | 1.81 | 14.7%  |
| Syt6    | 3.401822   | 0.33 | 9.6%   |
| Syt7    | 25.68704   | 3.08 | 12.0%  |
| Syt8    | 0.00609614 | 0.01 | 223.6% |
| Syt9    | 5.801288   | 0.32 | 5.5%   |
| SytI1   | 0.0173604  | 0.01 | 33.0%  |
| SytI2   | 0.8126322  | 0.16 | 19.5%  |
| SytI3   | 0.00402448 | 0.01 | 223.6% |
| SytI4   | 0.07939456 | 0.01 | 14.1%  |
| SytI5   | 0.08836    | 0.06 | 67.2%  |
| sytXIV  | 0.01980152 | 0.00 | 20.5%  |
| Syvn1   | 25.29068   | 0.90 | 3.6%   |
| T       | 0.01173126 | 0.01 | 106.0% |
| T2      | 0.03422682 | 0.02 | 64.5%  |
| T2bp    | 0.8129864  | 0.13 | 16.0%  |
| Taar1   | 0          | 0.00 |        |
| Taar2   | 0.02434118 | 0.02 | 92.7%  |
| Taar3   | 0          | 0.00 |        |
| Taar4   | 0.02822412 | 0.04 | 149.4% |
| Taar5   | 0          | 0.00 |        |
| Taar6   | 0          | 0.00 |        |
| Taar7a  | 0          | 0.00 |        |
| Taar7b  | 0          | 0.00 |        |
| Taar7d  | 0          | 0.00 |        |
| Taar7e  | 0          | 0.00 |        |
| Taar7f  | 0          | 0.00 |        |
| Taar8a  | 0          | 0.00 |        |
| Taar8b  | 0          | 0.00 |        |
| Taar8c  | 0          | 0.00 |        |
| Taar9   | 0          | 0.00 |        |
| Tac1    | 38.24288   | 2.72 | 7.1%   |
| Tac2    | 0.07652368 | 0.05 | 70.9%  |
| Tac4    | 0.00515716 | 0.01 | 223.6% |
| Tacc1   | 11.4064    | 0.79 | 6.9%   |
| Tacc2   | 18.88476   | 0.56 | 3.0%   |
| Tacc3   | 3.154218   | 0.25 | 8.1%   |
| Tacr1   | 8.85355    | 0.20 | 2.3%   |
| Tacr2   | 0          | 0.00 |        |
| Tacr3   | 3.022146   | 0.13 | 4.4%   |
| Tacstd1 | 0.5935186  | 0.20 | 34.2%  |
| Tacstd2 | 0.0075244  | 0.01 | 142.2% |
| Tada1I  | 14.01208   | 0.71 | 5.0%   |
| Tada2I  | 5.750512   | 0.40 | 6.9%   |
| Tada3I  | 8.851642   | 0.54 | 6.1%   |
| Taf1    | 18.94094   | 1.10 | 5.8%   |
| Taf10   | 3.143954   | 0.07 | 2.1%   |

|        |            |      |       |
|--------|------------|------|-------|
| Taf11  | 6.84615    | 0.28 | 4.1%  |
| Taf12  | 5.68985    | 0.20 | 3.5%  |
| Taf13  | 9.171914   | 0.96 | 10.5% |
| Taf15  | 23.23466   | 1.25 | 5.4%  |
| TAF170 | 0.02384402 | 0.00 | 20.7% |
| Taf1a  | 0          | 0.00 |       |
| Taf1b  | 8.37354    | 0.65 | 7.7%  |
| Taf1c  | 2.887238   | 0.03 | 0.9%  |
| Taf2   | 11.55892   | 0.39 | 3.4%  |
| Taf3   | 4.176718   | 0.37 | 8.9%  |
| Taf4a  | 2.936398   | 0.17 | 5.9%  |
| Taf4b  | 1.25358    | 0.25 | 19.7% |
| Taf5   | 2.584384   | 0.10 | 3.8%  |
| Taf5l  | 4.30926    | 0.14 | 3.3%  |
| Taf6   | 9.12881    | 0.12 | 1.3%  |
| Taf6l  | 4.528028   | 0.27 | 5.9%  |
| Taf7   | 5.62742    | 0.58 | 10.3% |
| Taf7l  | 0.2846722  | 0.09 | 30.9% |
| Taf8   | 2.117302   | 0.13 | 6.3%  |
| Taf9   | 28.53246   | 2.23 | 7.8%  |
| Taf9b  | 10.290252  | 1.05 | 10.2% |
| Tagap  | 0          | 0.00 |       |
| Tagap1 | 3.332196   | 0.21 | 6.2%  |
| tagL   | 0          | 0.00 |       |
| Tagln  | 0.7120328  | 0.10 | 14.7% |
| Tagln2 | 3.04183    | 0.53 | 17.3% |
| Tagln3 | 56.11136   | 2.22 | 4.0%  |
| Tal1   | 0.6174098  | 0.04 | 6.1%  |
| Tal2   | 0.0795676  | 0.07 | 91.8% |
| Taldo1 | 12.77812   | 2.11 | 16.5% |
| Tanc1  | 3.431522   | 0.36 | 10.4% |
| Tanc2  | 12.32714   | 0.73 | 6.0%  |
| Tank   | 5.436526   | 0.28 | 5.1%  |
| Taok1  | 15.28996   | 0.95 | 6.2%  |
| Taok2  | 30.2535    | 0.51 | 1.7%  |
| Taok3  | 8.016208   | 0.40 | 4.9%  |
| Tap1   | 2.820746   | 0.35 | 12.3% |
| Tap2   | 1.414884   | 0.17 | 12.1% |
| Tapbp  | 11.11582   | 0.74 | 6.6%  |
| Tapbpl | 1.58096    | 0.08 | 4.8%  |
| TAPL   | 0.224176   | 0.05 | 20.1% |
| Tapt1  | 14.47226   | 0.48 | 3.3%  |
| Tarbp2 | 3.935762   | 0.19 | 4.9%  |
| Tardbp | 23.31202   | 0.94 | 4.0%  |
| TARDBP | 0.470575   | 0.35 | 74.3% |
| Tars   | 18.39134   | 1.15 | 6.3%  |
| Tars2  | 9.691028   | 0.63 | 6.5%  |

|          |             |      |        |
|----------|-------------|------|--------|
| TARSH    | 0.006120188 | 0.01 | 95.0%  |
| Tarsl2   | 14.90094    | 1.23 | 8.3%   |
| Tas1r1   | 1.181784    | 0.06 | 4.7%   |
| Tas1r2   | 0.009936664 | 0.01 | 109.1% |
| Tas1r3   | 0.12414     | 0.01 | 5.5%   |
| Tas2r102 | 0           | 0.00 |        |
| Tas2r104 | 0           | 0.00 |        |
| Tas2r105 | 0           | 0.00 |        |
| Tas2r106 | 0           | 0.00 |        |
| Tas2r107 | 0           | 0.00 |        |
| Tas2r108 | 0           | 0.00 |        |
| Tas2r109 | 0           | 0.00 |        |
| Tas2r110 | 0           | 0.00 |        |
| Tas2r113 | 0           | 0.00 |        |
| Tas2r114 | 0           | 0.00 |        |
| Tas2r115 | 0           | 0.00 |        |
| Tas2r116 | 0           | 0.00 |        |
| Tas2r117 | 0           | 0.00 |        |
| Tas2r118 | 0           | 0.00 |        |
| Tas2r119 | 0           | 0.00 |        |
| Tas2r120 | 0           | 0.00 |        |
| Tas2r121 | 0           | 0.00 |        |
| Tas2r122 | 0           | 0.00 |        |
| Tas2r123 | 0           | 0.00 |        |
| Tas2r124 | 0           | 0.00 |        |
| Tas2r125 | 0.01250448  | 0.03 | 223.6% |
| Tas2r126 | 0           | 0.00 |        |
| Tas2r129 | 0           | 0.00 |        |
| Tas2r130 | 0           | 0.00 |        |
| Tas2r131 | 0           | 0.00 |        |
| Tas2r134 | 0           | 0.00 |        |
| Tas2r135 | 0.0108957   | 0.02 | 223.6% |
| Tas2r136 | 0           | 0.00 |        |
| Tas2r137 | 0.01759344  | 0.02 | 140.8% |
| Tas2r138 | 0           | 0.00 |        |
| Tas2r139 | 0           | 0.00 |        |
| Tas2r140 | 0           | 0.00 |        |
| Tas2r143 | 0.01917676  | 0.03 | 140.9% |
| Tas2r144 | 0           | 0.00 |        |
| Tasp1    | 8.552282    | 0.47 | 5.5%   |
| Tat      | 0           | 0.00 |        |
| Tatdn1   | 8.97488     | 0.99 | 11.0%  |
| Tatdn2   | 11.61786    | 0.72 | 6.2%   |
| Tatdn3   | 4.238728    | 0.50 | 11.8%  |
| Tax1bp1  | 43.59154    | 1.92 | 4.4%   |
| Tax1bp3  | 0.8601462   | 0.88 | 101.9% |
| Taz      | 10.8808     | 0.62 | 5.7%   |

|          |            |      |       |
|----------|------------|------|-------|
| Tbc1d1   | 4.332194   | 0.21 | 5.0%  |
| Tbc1d10a | 5.65692    | 0.62 | 11.0% |
| Tbc1d10b | 22.11664   | 1.16 | 5.2%  |
| Tbc1d10c | 0.3033472  | 0.11 | 34.9% |
| Tbc1d12  | 7.736018   | 0.48 | 6.2%  |
| Tbc1d13  | 17.39674   | 0.43 | 2.5%  |
| Tbc1d14  | 13.40318   | 0.61 | 4.5%  |
| Tbc1d15  | 7.589716   | 0.69 | 9.1%  |
| Tbc1d16  | 6.582988   | 0.57 | 8.7%  |
| Tbc1d17  | 13.51668   | 1.01 | 7.5%  |
| Tbc1d19  | 14.09768   | 1.24 | 8.8%  |
| Tbc1d2   | 0.1985146  | 0.05 | 25.3% |
| Tbc1d20  | 13.06542   | 0.81 | 6.2%  |
| Tbc1d21  | 0          | 0.00 |       |
| Tbc1d22a | 7.68479    | 0.51 | 6.7%  |
| Tbc1d22b | 16.57732   | 0.84 | 5.1%  |
| Tbc1d23  | 11.51492   | 0.67 | 5.8%  |
| Tbc1d24  | 22.31976   | 1.64 | 7.3%  |
| Tbc1d25  | 4.010346   | 0.35 | 8.8%  |
| Tbc1d2b  | 3.612724   | 0.37 | 10.2% |
| Tbc1d4   | 3.400216   | 0.29 | 8.6%  |
| Tbc1d5   | 5.136944   | 0.22 | 4.3%  |
| Tbc1d7   | 12.94614   | 0.51 | 3.9%  |
| Tbc1d8   | 2.75215    | 0.19 | 7.0%  |
| Tbc1d8b  | 0.5039474  | 0.07 | 14.7% |
| Tbc1d9   | 33.27882   | 0.98 | 3.0%  |
| Tbc1d9b  | 28.82946   | 1.19 | 4.1%  |
| Tbca     | 20.98608   | 1.65 | 7.9%  |
| Tbcb     | 55.51008   | 6.82 | 12.3% |
| Tbcc     | 6.132322   | 0.43 | 7.0%  |
| Tbccd1   | 3.476226   | 0.19 | 5.4%  |
| Tbcd     | 21.39114   | 0.32 | 1.5%  |
| Tbce     | 13.9259    | 1.27 | 9.1%  |
| Tbcel    | 10.388204  | 0.79 | 7.6%  |
| Tbk1     | 10.785968  | 0.64 | 5.9%  |
| Tbkbp1   | 9.428704   | 0.72 | 7.6%  |
| Tbl1x    | 15.91556   | 1.23 | 7.7%  |
| Tbl1xr1  | 7.906706   | 0.42 | 5.3%  |
| Tbl2     | 7.503682   | 0.55 | 7.4%  |
| Tbl3     | 8.854838   | 0.63 | 7.1%  |
| Tbn      | 0.5696418  | 0.15 | 25.6% |
| Tbp      | 8.047964   | 0.41 | 5.1%  |
| Tbpl1    | 21.94576   | 0.73 | 3.3%  |
| Tbpl2    | 0          | 0.00 |       |
| Tbr1     | 0.10862814 | 0.05 | 42.2% |
| Tbrg1    | 15.92746   | 1.27 | 8.0%  |
| Tbrg4    | 12.4823    | 0.22 | 1.7%  |



|         |            |      |        |
|---------|------------|------|--------|
| Tbx1    | 0.1094976  | 0.06 | 54.3%  |
| Tbx10   | 0.00365168 | 0.01 | 223.6% |
| Tbx15   | 1.99416    | 0.10 | 5.2%   |
| Tbx18   | 0.6063392  | 0.08 | 12.7%  |
| Tbx19   | 0          | 0.00 |        |
| Tbx2    | 1.1099886  | 0.19 | 16.8%  |
| Tbx20   | 0.139281   | 0.03 | 24.2%  |
| Tbx21   | 0.02968912 | 0.03 | 93.2%  |
| Tbx22   | 0.00239726 | 0.01 | 223.6% |
| Tbx3    | 0.5784016  | 0.10 | 17.0%  |
| Tbx4    | 0          | 0.00 |        |
| Tbx5    | 0.05774112 | 0.02 | 27.0%  |
| Tbx6    | 0.1629394  | 0.04 | 26.2%  |
| Tbxa2r  | 0.0245181  | 0.02 | 74.7%  |
| Tbxas1  | 0.1476778  | 0.03 | 19.1%  |
| Tc2n    | 0.03181948 | 0.02 | 51.0%  |
| Tca     | 0          | 0.00 |        |
| Tcam1   | 0.10340148 | 0.03 | 32.9%  |
| Tcap    | 0.05282498 | 0.04 | 75.4%  |
| Tcb     | 0          | 0.00 |        |
| Tcba1   | 7.985178   | 0.40 | 5.0%   |
| Tcea1   | 5.831032   | 0.33 | 5.6%   |
| Tcea2   | 10.089226  | 0.87 | 8.7%   |
| Tcea3   | 0.02727514 | 0.01 | 45.8%  |
| Tceal1  | 14.36582   | 0.21 | 1.5%   |
| Tceal3  | 20.39806   | 0.71 | 3.5%   |
| Tceal5  | 18.26034   | 0.82 | 4.5%   |
| Tceal6  | 12.27106   | 0.29 | 2.4%   |
| Tceal8  | 17.1376    | 1.49 | 8.7%   |
| Tceb1   | 48.8391    | 2.31 | 4.7%   |
| Tceb2   | 27.81958   | 1.31 | 4.7%   |
| Tceb3   | 7.201072   | 0.18 | 2.5%   |
| Tcerg1  | 13.04764   | 0.41 | 3.2%   |
| Tcerg1l | 18.81542   | 2.11 | 11.2%  |
| Tcf12   | 12.8666    | 0.91 | 7.1%   |
| Tcf15   | 0.0694984  | 0.07 | 94.3%  |
| Tcf19   | 0.989858   | 0.16 | 15.9%  |
| Tcf20   | 16.24924   | 0.87 | 5.4%   |
| Tcf21   | 0.0337449  | 0.03 | 96.9%  |
| Tcf23   | 0.07731798 | 0.04 | 54.7%  |
| Tcf25   | 225.9016   | 8.36 | 3.7%   |
| Tcf3    | 1.62007    | 0.35 | 21.7%  |
| Tcf4    | 0.22068456 | 0.21 | 93.7%  |
| Tcf7    | 0.2887664  | 0.06 | 19.7%  |
| Tcf7l2  | 3.151036   | 0.76 | 24.3%  |
| TCF9    | 0.1295958  | 0.02 | 17.2%  |
| Tcfap2a | 5.781764   | 0.83 | 14.4%  |

|                            |             |      |        |
|----------------------------|-------------|------|--------|
| Tcfap2b                    | 3.965948    | 0.49 | 12.3%  |
| Tcfap2c                    | 0.225749    | 0.05 | 23.8%  |
| Tcfap2d                    | 0.02806398  | 0.02 | 86.5%  |
| Tcfap2e                    | 0.03914256  | 0.02 | 54.0%  |
| Tcfap4                     | 1.950354    | 0.26 | 13.5%  |
| Tcfcp2                     | 8.61894     | 0.46 | 5.3%   |
| Tcfcp2l1                   | 0.224464    | 0.04 | 19.4%  |
| Tcfe2a                     | 3.142084    | 0.35 | 11.3%  |
| Tcfe3                      | 5.105448    | 1.30 | 25.4%  |
| Tcfeb                      | 1.0784844   | 0.17 | 15.6%  |
| Tcfec                      | 0.03574168  | 0.04 | 110.5% |
| Tcfi5                      | 1.647108    | 0.29 | 17.5%  |
| Tchhl1                     | 0           | 0.00 |        |
| Tchp                       | 2.892248    | 0.19 | 6.5%   |
| Tcirg1                     | 2.754846    | 0.42 | 15.3%  |
| Tcl1                       | 0           | 0.00 |        |
| Tcl1b1                     | 0           | 0.00 |        |
| Tcl1b2                     | 0.00658426  | 0.01 | 223.6% |
| Tcl1b3                     | 0           | 0.00 |        |
| Tcl1b4                     | 0           | 0.00 |        |
| Tcl1b5                     | 0           | 0.00 |        |
| Tcn2                       | 3.551722    | 0.33 | 9.2%   |
| Tcof1                      | 3.522698    | 0.25 | 7.1%   |
| Tcp1                       | 73.39976    | 2.86 | 3.9%   |
| Tcp10a                     | 0.001393713 | 0.00 | 183.0% |
| Tcp10b                     | 0.02844862  | 0.02 | 72.8%  |
| Tcp10c                     | 0.04934034  | 0.03 | 64.1%  |
| Tcp11                      | 0.05727984  | 0.02 | 40.8%  |
| Tcp11l1                    | 3.937658    | 0.60 | 15.1%  |
| Tcp11l2                    | 4.583442    | 0.97 | 21.2%  |
| tcr                        | 0           | 0.00 |        |
| TCR_[alpha]                | 0           | 0.00 |        |
| TCR_AV1S1Jalpha10          | 0           | 0.00 |        |
| TCR_BV10S1A2Dbeta1Jbeta2.1 | 0           | 0.00 |        |
| TCRA                       | 0           | 0.00 |        |
| Tcra                       | 0           | 0.00 |        |
| TCR-alpha_chain            | 0.09058512  | 0.10 | 108.1% |
| TCRB                       | 0           | 0.00 |        |
| Tcrb                       | 0           | 0.00 |        |
| TCR-beta_chain             | 0           | 0.00 |        |
| Tcrb-V13                   | 0           | 0.00 |        |
| TCRBVbeta5.1/Jbeta1.5      | 0           | 0.00 |        |
| Tcrg                       | 0           | 0.00 |        |
| Tcrg-C                     | 0           | 0.00 |        |
| TCR-V[alpha]new            | 0           | 0.00 |        |
| TCRV-alpha_22.1            | 0           | 0.00 |        |
| Tcstv3                     | 0           | 0.00 |        |

|          |            |      |        |
|----------|------------|------|--------|
| Tcta     | 15.69564   | 1.56 | 9.9%   |
| Tcte1    | 0.1525766  | 0.02 | 16.0%  |
| Tcte2    | 1.4629464  | 1.01 | 69.4%  |
| Tcte3    | 0.05624242 | 0.06 | 111.2% |
| Tctex1d1 | 0.0546124  | 0.07 | 137.0% |
| Tctex-3  | 7.271172   | 1.39 | 19.2%  |
| Tctn2    | 7.134396   | 0.36 | 5.0%   |
| Tctn3    | 5.630494   | 0.49 | 8.6%   |
| Tdg      | 0.07264346 | 0.03 | 43.2%  |
| Tdgf1    | 0.02146498 | 0.03 | 148.6% |
| Tdh      | 0.03344718 | 0.03 | 99.6%  |
| Tdo2     | 0.02136042 | 0.01 | 61.7%  |
| Tdp1     | 3.32166    | 0.48 | 14.6%  |
| Tdpoz1   | 0          | 0.00 |        |
| Tdpoz2   | 0          | 0.00 |        |
| Tdpoz3   | 0          | 0.00 |        |
| Tdpoz4   | 0          | 0.00 |        |
| Tdpoz5   | 0          | 0.00 |        |
| Tdrd1    | 0.12691034 | 0.04 | 28.8%  |
| Tdrd3    | 5.520854   | 0.31 | 5.6%   |
| Tdrd5    | 0.3226222  | 0.10 | 31.3%  |
| Tdrd6    | 0.1639812  | 0.02 | 14.2%  |
| Tdrd7    | 8.58178    | 0.62 | 7.2%   |
| Tdrd9    | 0.02018156 | 0.01 | 71.4%  |
| Tdrkh    | 14.70184   | 0.28 | 1.9%   |
| Tead1    | 1.697638   | 0.24 | 14.2%  |
| Tead2    | 2.219278   | 0.36 | 16.1%  |
| Tead3    | 1.091558   | 0.14 | 12.9%  |
| Tead4    | 0.0412484  | 0.02 | 47.9%  |
| Tec      | 0.5024736  | 0.11 | 21.6%  |
| TECK     | 2.73811    | 0.25 | 9.2%   |
| Tect1    | 5.202334   | 0.20 | 3.7%   |
| Tect2    | 0.7188822  | 0.61 | 84.8%  |
| Tect3    | 0.22804236 | 0.09 | 40.9%  |
| Tecta    | 0.0414035  | 0.01 | 22.5%  |
| Tectb    | 0.00455178 | 0.01 | 137.3% |
| Teddm1   | 0.00541768 | 0.01 | 223.6% |
| Tef      | 41.932     | 8.60 | 20.5%  |
| Tegt     | 112.5974   | 7.26 | 6.5%   |
| Tek      | 0.265558   | 0.08 | 30.3%  |
| Tekt1    | 0.0538667  | 0.02 | 34.5%  |
| Tekt2    | 0.11721566 | 0.04 | 37.5%  |
| Tekt3    | 0.00304668 | 0.01 | 223.6% |
| Tekt4    | 0.01002842 | 0.01 | 92.7%  |
| Tekt5    | 0.1854206  | 0.08 | 45.4%  |
| Telo2    | 5.555862   | 0.31 | 5.5%   |
| Tem8     | 1.0394078  | 0.32 | 31.2%  |

|            |            |      |        |
|------------|------------|------|--------|
| Tenc1      | 4.20515    | 1.49 | 35.4%  |
| ten-m1     | 2.9871092  | 1.77 | 59.1%  |
| ten-m2     | 0.6849166  | 0.34 | 50.4%  |
| ten-m3     | 0.26987232 | 0.16 | 57.5%  |
| ten-m4     | 0.1757864  | 0.07 | 38.0%  |
| Tep1       | 0.4177998  | 0.09 | 22.0%  |
| Tera       | 0.12711582 | 0.04 | 31.7%  |
| Terf1      | 5.009978   | 0.38 | 7.5%   |
| Terf2      | 10.89216   | 0.52 | 4.8%   |
| Terf2ip    | 10.83168   | 0.43 | 3.9%   |
| Tert       | 0.10816522 | 0.03 | 25.6%  |
| Tes        | 6.395714   | 0.86 | 13.5%  |
| Tesc       | 1.470546   | 0.28 | 19.2%  |
| Task1      | 16.06072   | 1.75 | 10.9%  |
| Task2      | 0.4313864  | 0.10 | 24.0%  |
| Tesp1      | 0          | 0.00 |        |
| Tesp2      | 0          | 0.00 |        |
| Tessp2     | 0.00528904 | 0.01 | 223.6% |
| Tessp3     | 0          | 0.00 |        |
| testican-2 | 0.3135536  | 0.28 | 88.5%  |
| Tex10      | 7.294426   | 0.60 | 8.2%   |
| Tex101     | 0          | 0.00 |        |
| Tex11      | 0.1370286  | 0.03 | 20.0%  |
| Tex12      | 0.0235694  | 0.03 | 138.2% |
| Tex13      | 0.4890162  | 0.07 | 15.0%  |
| Tex14      | 0.21961774 | 0.07 | 33.7%  |
| Tex15      | 1.48575    | 0.20 | 13.7%  |
| Tex16      | 0.02441148 | 0.01 | 59.7%  |
| Tex18      | 0          | 0.00 |        |
| Tex19      | 0.15957574 | 0.10 | 62.7%  |
| Tex2       | 21.45094   | 1.69 | 7.9%   |
| Tex21      | 0.00608898 | 0.01 | 138.6% |
| Tex22      | 0.01182808 | 0.03 | 223.6% |
| Tex24      | 0.0027331  | 0.01 | 223.6% |
| Tex261     | 11.1733    | 0.30 | 2.7%   |
| Tex264     | 28.6741    | 1.85 | 6.5%   |
| Tex9       | 0.1375866  | 0.04 | 30.6%  |
| Tfam       | 9.36823    | 0.33 | 3.6%   |
| Tfb1m      | 2.103232   | 0.50 | 23.6%  |
| Tfb2m      | 2.425276   | 0.20 | 8.1%   |
| Tfdp1      | 4.36548    | 0.44 | 10.1%  |
| Tfdp2      | 2.970048   | 0.39 | 13.1%  |
| Tfe3       | 4.861006   | 1.14 | 23.5%  |
| Tff1       | 0          | 0.00 |        |
| Tff2       | 0.640876   | 0.52 | 81.1%  |
| Tff3       | 0.0574305  | 0.06 | 108.2% |
| Tfg        | 47.66706   | 2.03 | 4.3%   |

|          |             |      |        |
|----------|-------------|------|--------|
| Tfip11   | 11.26306    | 0.41 | 3.6%   |
| Tfpi     | 1.836224    | 0.32 | 17.3%  |
| Tfpi2    | 0.00501612  | 0.01 | 223.6% |
| Tfpt     | 7.56479     | 0.47 | 6.2%   |
| Tfrc     | 113.9936    | 3.23 | 2.8%   |
| Tg       | 0.018228242 | 0.01 | 49.6%  |
| Tgds     | 3.37123     | 0.38 | 11.3%  |
| Tgfa     | 1.59547     | 0.24 | 14.8%  |
| Tgfb1    | 0.3556824   | 0.09 | 24.9%  |
| Tgfb1i1  | 4.8374      | 1.34 | 27.7%  |
| Tgfb2    | 3.785414    | 0.34 | 9.0%   |
| Tgfb3    | 2.0988      | 0.30 | 14.5%  |
| Tgfb1    | 0.2944156   | 0.09 | 29.4%  |
| Tgibr1   | 4.506456    | 0.39 | 8.6%   |
| Tgibr2   | 3.837246    | 0.61 | 15.8%  |
| Tgibr3   | 2.761522    | 0.63 | 22.8%  |
| Tgibrap1 | 8.528738    | 0.31 | 3.6%   |
| Tgif1    | 0.8588008   | 0.17 | 20.0%  |
| Tgif2    | 1.195474    | 0.17 | 14.2%  |
| Tgifx1   | 0           | 0.00 |        |
| Tgm1     | 0.0296152   | 0.03 | 92.5%  |
| Tgm2     | 1.564724    | 0.34 | 21.6%  |
| Tgm3     | 0.07023916  | 0.02 | 32.1%  |
| Tgm4     | 0.07435696  | 0.02 | 25.6%  |
| Tgm5     | 0.00300406  | 0.01 | 223.6% |
| Tgm6     | 0.019405824 | 0.01 | 70.9%  |
| Tgoln2   | 44.13556    | 1.34 | 3.0%   |
| Tgs1     | 4.18683     | 0.28 | 6.6%   |
| Tgtp     | 0           | 0.00 |        |
| Th       | 0.00716558  | 0.01 | 139.4% |
| Th1l     | 9.880228    | 0.57 | 5.8%   |
| Tha1     | 1.221152    | 0.10 | 7.8%   |
| Thada    | 2.07656     | 0.20 | 9.7%   |
| Thap1    | 3.216592    | 0.29 | 9.2%   |
| Thap11   | 9.093538    | 0.39 | 4.3%   |
| Thap2    | 2.187998    | 0.19 | 8.5%   |
| Thap3    | 5.459978    | 0.11 | 2.1%   |
| Thap4    | 8.109882    | 0.35 | 4.3%   |
| Thap7    | 6.366084    | 0.69 | 10.9%  |
| Thbd     | 0.263292    | 0.08 | 31.5%  |
| Thbs1    | 2.072334    | 0.37 | 18.0%  |
| Thbs2    | 8.499788    | 1.08 | 12.7%  |
| Thbs3    | 1.85783     | 0.15 | 8.3%   |
| Thbs4    | 0.006071898 | 0.01 | 159.2% |
| Theg     | 0           | 0.00 |        |
| Them2    | 17.67984    | 1.09 | 6.2%   |
| Them4    | 15.40616    | 0.58 | 3.8%   |

|          |            |       |        |
|----------|------------|-------|--------|
| Them5    | 0.02448276 | 0.03  | 137.6% |
| Thex1    | 3.649138   | 0.31  | 8.4%   |
| Thg1l    | 3.078626   | 0.50  | 16.2%  |
| Thnsl1   | 7.205272   | 0.44  | 6.1%   |
| Thnsl2   | 1.637238   | 0.27  | 16.8%  |
| Thoc1    | 9.09688    | 0.71  | 7.8%   |
| Thoc2    | 7.406092   | 0.52  | 7.0%   |
| Thoc3    | 13.30362   | 1.16  | 8.7%   |
| Thoc4    | 7.201162   | 0.47  | 6.6%   |
| Thoc5    | 10.290514  | 0.52  | 5.1%   |
| Thoc6    | 8.83613    | 2.35  | 26.6%  |
| Thoc7    | 52.31254   | 1.81  | 3.5%   |
| Thop1    | 8.137912   | 0.51  | 6.2%   |
| Thpo     | 1.5529816  | 0.61  | 39.0%  |
| Thra     | 152.0128   | 4.70  | 3.1%   |
| Thrap2   | 0.354184   | 0.12  | 34.3%  |
| Thrap3   | 10.352104  | 0.57  | 5.5%   |
| Thrap4   | 5.276202   | 0.63  | 11.9%  |
| Thrb     | 0.9959332  | 0.16  | 15.9%  |
| Thrsp    | 4.15072    | 0.67  | 16.1%  |
| Thsd1    | 0.364998   | 0.11  | 30.6%  |
| Thsd4    | 0.7255902  | 0.08  | 10.9%  |
| Thsd7b   | 4.97701    | 0.39  | 7.9%   |
| Thtpa    | 10.6237    | 0.35  | 3.3%   |
| Thumpd1  | 15.30082   | 0.60  | 3.9%   |
| Thumpd2  | 1.1282226  | 0.26  | 23.4%  |
| Thumpd3  | 8.872318   | 1.05  | 11.9%  |
| Thy1     | 174.9756   | 11.78 | 6.7%   |
| Thyn1    | 21.04954   | 2.37  | 11.3%  |
| Tia1     | 18.49098   | 1.01  | 5.5%   |
| Tial1    | 21.7389    | 1.58  | 7.3%   |
| Tiam1    | 6.717722   | 0.18  | 2.7%   |
| Tiam2    | 0.7648546  | 0.03  | 4.4%   |
| Ticam1   | 0.6304422  | 0.07  | 10.5%  |
| Ticam2   | 0.01716857 | 0.02  | 121.5% |
| Tid1     | 0.0567735  | 0.01  | 20.3%  |
| Tie1     | 0          | 0.00  |        |
| Tifp39   | 0.01558924 | 0.03  | 223.6% |
| Tigd2    | 5.273862   | 0.38  | 7.3%   |
| Tigd3    | 1.562126   | 0.11  | 6.8%   |
| Tigd4    | 0          | 0.00  |        |
| Tigd5    | 1.643028   | 0.18  | 11.0%  |
| Tilz3b   | 0.04950452 | 0.03  | 51.6%  |
| Tim9b    | 8.860318   | 0.55  | 6.2%   |
| Timd2    | 0          | 0.00  |        |
| Timd4    | 0          | 0.00  |        |
| Timeless | 0.9582492  | 0.05  | 5.1%   |

|         |             |      |        |
|---------|-------------|------|--------|
| Timm10  | 17.40996    | 2.33 | 13.4%  |
| Timm13  | 24.17514    | 1.99 | 8.2%   |
| Timm17a | 21.15802    | 1.19 | 5.6%   |
| Timm17b | 8.037986    | 0.88 | 11.0%  |
| Timm22  | 11.30498    | 0.41 | 3.6%   |
| Timm23  | 2.24557     | 0.20 | 9.0%   |
| Timm44  | 15.36362    | 0.99 | 6.5%   |
| Timm50  | 15.80976    | 1.68 | 10.6%  |
| Timm8a1 | 0.7514236   | 0.10 | 12.8%  |
| Timm8a2 | 0.00501058  | 0.01 | 223.6% |
| Timm8b  | 50.66366    | 3.33 | 6.6%   |
| Timm9   | 19.27712    | 1.63 | 8.4%   |
| Timp1   | 1.052438    | 0.40 | 38.5%  |
| Timp2   | 73.2074     | 1.78 | 2.4%   |
| Timp3   | 8.793072    | 0.69 | 7.9%   |
| Timp4   | 9.642564    | 1.00 | 10.3%  |
| Tinag   | 0           | 0.00 |        |
| Tinagl  | 0.14827464  | 0.07 | 46.2%  |
| Tinagl1 | 0.372162    | 0.03 | 6.8%   |
| Tinf2   | 2.905032    | 0.32 | 10.9%  |
| TIP5    | 0.41992742  | 0.39 | 93.2%  |
| Tiparp  | 5.076766    | 0.46 | 9.1%   |
| Tipin   | 3.23574     | 0.31 | 9.5%   |
| TIPR    | 0.149307    | 0.06 | 37.2%  |
| Tiprl   | 10.9871     | 0.79 | 7.2%   |
| Tirap   | 0.4491808   | 0.06 | 13.9%  |
| Titf1   | 0.00675354  | 0.01 | 137.0% |
| Tjap1   | 4.43627     | 0.44 | 10.0%  |
| Tjp1    | 8.021982    | 0.30 | 3.7%   |
| Tjp2    | 2.075662    | 0.27 | 12.8%  |
| Tjp3    | 1.868558    | 0.11 | 5.9%   |
| Tk1     | 0.4635328   | 0.08 | 17.3%  |
| Tk2     | 16.71948    | 0.60 | 3.6%   |
| Tkt     | 64.03532    | 3.80 | 5.9%   |
| Tktl1   | 0.0348263   | 0.02 | 48.4%  |
| Tktl2   | 0.015163654 | 0.01 | 69.8%  |
| Tlcd1   | 2.281354    | 0.14 | 6.2%   |
| Tle1    | 7.071462    | 0.92 | 13.0%  |
| Tle2    | 2.411822    | 0.26 | 10.6%  |
| Tle3    | 6.600028    | 0.54 | 8.2%   |
| Tle4    | 18.60258    | 1.26 | 6.8%   |
| Tle6    | 0.2041234   | 0.07 | 36.6%  |
| Tlk1    | 12.68074    | 0.38 | 3.0%   |
| Tlk2    | 16.38056    | 0.99 | 6.0%   |
| Tll1    | 0.9515436   | 0.09 | 9.1%   |
| Tll2    | 0.1659437   | 0.06 | 34.6%  |
| Tln1    | 3.142692    | 0.42 | 13.3%  |

|         |             |      |        |
|---------|-------------|------|--------|
| Tln2    | 15.52502    | 0.58 | 3.8%   |
| Tloc1   | 50.5832     | 0.86 | 1.7%   |
| Tlr1    | 0           | 0.00 |        |
| Tlr11   | 0           | 0.00 |        |
| Tlr12   | 0.06442678  | 0.01 | 23.0%  |
| Tlr13   | 0           | 0.00 |        |
| Tlr2    | 0.2494668   | 0.02 | 9.0%   |
| Tlr3    | 0.4495068   | 0.11 | 24.6%  |
| Tlr4    | 0.0351555   | 0.05 | 152.2% |
| Tlr5    | 0.0421468   | 0.04 | 98.3%  |
| Tlr6    | 0.016878    | 0.02 | 100.0% |
| Tlr7    | 0.00284644  | 0.01 | 223.6% |
| Tlr8    | 0           | 0.00 |        |
| Tlr9    | 0.001750422 | 0.00 | 223.6% |
| Tlx1    | 0.7306184   | 0.16 | 22.3%  |
| Tlx2    | 0.00390096  | 0.01 | 223.6% |
| Tlx3    | 0.6540054   | 0.14 | 21.1%  |
| Tm2d1   | 9.438086    | 0.63 | 6.6%   |
| Tm2d2   | 33.7052     | 2.54 | 7.5%   |
| Tm2d3   | 11.89308    | 0.38 | 3.2%   |
| Tm4sf1  | 0.1596554   | 0.07 | 42.5%  |
| Tm4sf20 | 0           | 0.00 |        |
| Tm4sf4  | 0           | 0.00 |        |
| Tm4sf5  | 0.2339174   | 0.07 | 31.3%  |
| Tm6sf1  | 4.607614    | 1.15 | 24.9%  |
| Tm6sf2  | 0.4953414   | 0.13 | 25.5%  |
| Tm7sf1  | 1.450552    | 0.11 | 7.7%   |
| Tm7sf2  | 41.10968    | 5.97 | 14.5%  |
| Tm7sf3  | 7.95533     | 0.48 | 6.0%   |
| Tm7sf4  | 0.0278291   | 0.02 | 59.6%  |
| Tm9sf1  | 15.3729     | 1.15 | 7.5%   |
| Tm9sf2  | 39.9308     | 1.25 | 3.1%   |
| Tm9sf3  | 55.16316    | 1.42 | 2.6%   |
| Tm9sf4  | 30.19744    | 0.50 | 1.7%   |
| Tmbim1  | 1.845122    | 0.32 | 17.2%  |
| Tmbim4  | 24.98102    | 1.35 | 5.4%   |
| Tmc1    | 0.03325174  | 0.02 | 58.8%  |
| Tmc2    | 0.00489416  | 0.01 | 137.0% |
| Tmc3    | 0.3482704   | 0.04 | 12.4%  |
| Tmc4    | 4.04724     | 1.27 | 31.5%  |
| Tmc5    | 0.004944244 | 0.01 | 142.9% |
| Tmc6    | 0.2806844   | 0.09 | 33.8%  |
| Tmc7    | 1.44295     | 0.14 | 10.0%  |
| Tmc8    | 0.028952608 | 0.02 | 71.2%  |
| Tmcc1   | 8.506572    | 0.34 | 3.9%   |
| Tmcc2   | 38.38478    | 1.98 | 5.1%   |
| Tmcc3   | 3.837512    | 0.14 | 3.7%   |



|          |            |      |        |
|----------|------------|------|--------|
| Tmco1    | 7.756548   | 0.42 | 5.4%   |
| Tmco2    | 0.01238346 | 0.03 | 223.6% |
| Tmco3    | 5.894202   | 0.89 | 15.1%  |
| Tmco4    | 0.08444714 | 0.04 | 45.4%  |
| Tmco5    | 0          | 0.00 |        |
| Tmco6    | 3.883526   | 0.53 | 13.7%  |
| Tmco7    | 1.566538   | 0.11 | 7.0%   |
| Tmed1    | 3.71461    | 0.42 | 11.3%  |
| Tmed10   | 34.01244   | 1.32 | 3.9%   |
| Tmed2    | 5.592846   | 0.44 | 7.9%   |
| Tmed3    | 19.24176   | 1.35 | 7.0%   |
| Tmed4    | 20.83632   | 0.86 | 4.1%   |
| Tmed5    | 5.863622   | 0.27 | 4.7%   |
| Tmed6    | 0          | 0.00 |        |
| Tmed8    | 13.12728   | 0.67 | 5.1%   |
| Tmed9    | 40.353     | 2.84 | 7.0%   |
| Tmeff1   | 57.66626   | 5.45 | 9.4%   |
| Tmeff2   | 15.3992    | 0.94 | 6.1%   |
| TMEFF2   | 0.05687302 | 0.05 | 84.0%  |
| Tmem1    | 20.7404    | 1.03 | 4.9%   |
| Tmem10   | 0          | 0.00 |        |
| Tmem100  | 0.742523   | 0.20 | 26.3%  |
| Tmem101  | 13.95394   | 0.59 | 4.2%   |
| Tmem102  | 0.366808   | 0.12 | 33.0%  |
| Tmem103  | 4.564452   | 0.18 | 4.0%   |
| Tmem104  | 3.662626   | 0.40 | 11.0%  |
| Tmem106a | 0.1087552  | 0.04 | 40.0%  |
| Tmem106b | 35.53282   | 4.17 | 11.7%  |
| Tmem106c | 9.155506   | 1.09 | 11.9%  |
| Tmem107  | 3.835998   | 0.35 | 9.1%   |
| Tmem108  | 5.715846   | 0.31 | 5.4%   |
| Tmem109  | 12.31356   | 0.43 | 3.5%   |
| Tmem11   | 12.3812    | 0.96 | 7.7%   |
| Tmem110  | 4.374312   | 0.14 | 3.2%   |
| Tmem111  | 25.7796    | 1.32 | 5.1%   |
| Tmem112  | 4.86314    | 0.32 | 6.6%   |
| Tmem112b | 7.635216   | 0.29 | 3.7%   |
| Tmem115  | 10.525776  | 0.69 | 6.6%   |
| Tmem116  | 1.4690238  | 0.80 | 54.8%  |
| Tmem117  | 17.56068   | 1.53 | 8.7%   |
| Tmem118  | 28.98338   | 0.99 | 3.4%   |
| Tmem119  | 0.7721078  | 0.24 | 31.6%  |
| Tmem120a | 7.98152    | 0.43 | 5.4%   |
| Tmem120b | 3.045412   | 0.23 | 7.5%   |
| Tmem121  | 8.498754   | 0.78 | 9.2%   |
| Tmem123  | 2.850378   | 0.38 | 13.2%  |
| Tmem125  | 0.03142242 | 0.03 | 107.6% |

|          |             |      |        |
|----------|-------------|------|--------|
| Tmem126a | 16.2539     | 1.80 | 11.1%  |
| Tmem126b | 15.07208    | 0.41 | 2.7%   |
| Tmem127  | 49.32404    | 1.80 | 3.7%   |
| Tmem128  | 26.27488    | 1.30 | 4.9%   |
| Tmem129  | 9.170458    | 0.66 | 7.1%   |
| Tmem130  | 183.3228    | 8.52 | 4.6%   |
| Tmem131  | 12.76738    | 0.29 | 2.3%   |
| Tmem132a | 32.9914     | 2.23 | 6.7%   |
| Tmem132b | 4.713914    | 0.60 | 12.8%  |
| Tmem132d | 2.355102    | 0.14 | 6.1%   |
| Tmem132e | 6.075792    | 0.04 | 0.7%   |
| Tmem134  | 7.406924    | 0.70 | 9.4%   |
| Tmem135  | 25.12806    | 0.96 | 3.8%   |
| Tmem136  | 5.614248    | 0.21 | 3.7%   |
| Tmem138  | 8.807592    | 0.71 | 8.1%   |
| Tmem139  | 0.02125222  | 0.02 | 102.6% |
| Tmem140  | 0.07475002  | 0.08 | 113.2% |
| Tmem141  | 8.108452    | 0.69 | 8.5%   |
| Tmem143  | 7.138052    | 0.37 | 5.2%   |
| Tmem144  | 0.4676818   | 0.07 | 15.5%  |
| Tmem145  | 39.02164    | 1.82 | 4.7%   |
| Tmem146  | 0.15728598  | 0.05 | 32.6%  |
| Tmem147  | 52.93476    | 3.17 | 6.0%   |
| Tmem149  | 1.3415646   | 0.26 | 19.6%  |
| Tmem14a  | 5.728178    | 0.33 | 5.7%   |
| Tmem14c  | 21.61912    | 1.41 | 6.5%   |
| Tmem150  | 3.515236    | 0.33 | 9.3%   |
| Tmem151  | 52.67644    | 4.42 | 8.4%   |
| Tmem154  | 0.027912756 | 0.01 | 40.6%  |
| Tmem157  | 17.27948    | 0.92 | 5.3%   |
| Tmem158  | 4.015484    | 0.46 | 11.4%  |
| Tmem159  | 1.961512    | 0.22 | 11.4%  |
| Tmem160  | 22.96856    | 2.76 | 12.0%  |
| Tmem161a | 7.883132    | 0.43 | 5.5%   |
| Tmem161b | 7.554554    | 0.33 | 4.3%   |
| Tmem162  | 0.03537672  | 0.03 | 93.3%  |
| Tmem163  | 34.16312    | 2.80 | 8.2%   |
| Tmem164  | 4.675904    | 0.41 | 8.8%   |
| Tmem165  | 14.1266     | 1.37 | 9.7%   |
| Tmem166  | 0.419749    | 0.09 | 22.5%  |
| Tmem167  | 16.1203     | 0.87 | 5.4%   |
| Tmem168  | 3.887698    | 0.30 | 7.8%   |
| Tmem169  | 13.84786    | 0.84 | 6.1%   |
| Tmem16a  | 0.12430872  | 0.04 | 29.6%  |
| Tmem16b  | 0.04425908  | 0.02 | 56.3%  |
| Tmem16c  | 0.2711762   | 0.12 | 43.2%  |
| Tmem16d  | 9.330558    | 0.33 | 3.6%   |

|          |            |      |        |
|----------|------------|------|--------|
| Tmem16e  | 0.2831648  | 0.04 | 13.5%  |
| Tmem16f  | 9.033254   | 0.62 | 6.9%   |
| Tmem16g  | 0.00579106 | 0.01 | 150.9% |
| Tmem16h  | 15.53554   | 1.03 | 6.6%   |
| Tmem16j  | 0.0043887  | 0.01 | 137.0% |
| Tmem16k  | 14.03248   | 0.52 | 3.7%   |
| Tmem17   | 4.246456   | 0.91 | 21.5%  |
| Tmem170  | 0.7465104  | 0.09 | 11.8%  |
| Tmem171  | 0.00461426 | 0.01 | 223.6% |
| Tmem173  | 0.2068036  | 0.05 | 24.6%  |
| Tmem174  | 0          | 0.00 |        |
| Tmem175  | 19.10182   | 4.36 | 22.8%  |
| Tmem176a | 10.450798  | 1.91 | 18.3%  |
| Tmem176b | 18.03568   | 2.47 | 13.7%  |
| Tmem177  | 1.859724   | 0.11 | 5.9%   |
| Tmem178  | 7.589758   | 0.31 | 4.1%   |
| Tmem179  | 37.32004   | 1.48 | 4.0%   |
| Tmem18   | 14.95028   | 0.63 | 4.2%   |
| Tmem180  | 11.59478   | 0.84 | 7.3%   |
| Tmem181  | 8.0368     | 0.56 | 7.0%   |
| Tmem182  | 0.03900622 | 0.03 | 76.0%  |
| Tmem183a | 20.99936   | 0.82 | 3.9%   |
| Tmem184a | 0.108637   | 0.06 | 55.7%  |
| Tmem184b | 13.94994   | 0.50 | 3.6%   |
| Tmem185b | 6.393576   | 0.45 | 7.1%   |
| Tmem186  | 6.172158   | 0.39 | 6.3%   |
| Tmem188  | 2.11467    | 0.37 | 17.4%  |
| Tmem189  | 14.38922   | 0.45 | 3.1%   |
| Tmem19   | 12.61548   | 0.58 | 4.6%   |
| Tmem2    | 3.47619    | 0.35 | 10.1%  |
| Tmem20   | 0.5081964  | 0.02 | 4.2%   |
| Tmem24   | 11.07526   | 0.65 | 5.9%   |
| Tmem25   | 16.70496   | 1.55 | 9.3%   |
| Tmem26   | 0.03975376 | 0.01 | 29.2%  |
| Tmem27   | 0.0180565  | 0.03 | 154.1% |
| Tmem28   | 26.19832   | 1.35 | 5.1%   |
| Tmem30a  | 117.6128   | 4.64 | 3.9%   |
| Tmem30b  | 0.1522226  | 0.02 | 14.0%  |
| Tmem32   | 18.86744   | 1.58 | 8.4%   |
| Tmem33   | 29.38782   | 0.88 | 3.0%   |
| Tmem34   | 24.89886   | 0.41 | 1.6%   |
| Tmem35   | 26.01388   | 1.16 | 4.5%   |
| Tmem37   | 0.3746766  | 0.05 | 14.2%  |
| Tmem38a  | 26.54518   | 2.16 | 8.1%   |
| Tmem38b  | 2.406878   | 0.43 | 17.9%  |
| Tmem39a  | 4.796672   | 0.44 | 9.1%   |
| Tmem39b  | 3.434672   | 0.35 | 10.3%  |

|         |            |      |        |
|---------|------------|------|--------|
| Tmem4   | 15.02082   | 1.12 | 7.5%   |
| Tmem40  | 0.10262874 | 0.06 | 61.9%  |
| Tmem41a | 8.20866    | 0.61 | 7.5%   |
| Tmem41b | 11.59978   | 0.45 | 3.9%   |
| Tmem42  | 4.904624   | 0.63 | 12.9%  |
| Tmem43  | 14.01602   | 0.39 | 2.8%   |
| Tmem44  | 4.044652   | 0.31 | 7.6%   |
| Tmem45a | 1.1051192  | 0.47 | 42.1%  |
| Tmem45b | 0.03720318 | 0.03 | 82.1%  |
| Tmem46  | 2.890494   | 0.29 | 10.0%  |
| Tmem47  | 36.98134   | 0.37 | 1.0%   |
| Tmem48  | 6.65934    | 0.43 | 6.5%   |
| Tmem49  | 26.55726   | 2.14 | 8.1%   |
| Tmem5   | 14.07058   | 0.43 | 3.0%   |
| Tmem50a | 37.17318   | 1.59 | 4.3%   |
| Tmem50b | 43.12128   | 2.23 | 5.2%   |
| Tmem51  | 0.456734   | 0.33 | 72.1%  |
| Tmem52  | 0.02013468 | 0.02 | 99.5%  |
| Tmem53  | 3.082398   | 0.38 | 12.5%  |
| Tmem54  | 0.12295208 | 0.26 | 211.5% |
| Tmem55a | 30.49778   | 1.77 | 5.8%   |
| Tmem55b | 31.3881    | 2.74 | 8.7%   |
| Tmem56  | 12.638     | 0.65 | 5.2%   |
| Tmem57  | 19.421     | 0.39 | 2.0%   |
| Tmem58  | 21.90522   | 2.87 | 13.1%  |
| Tmem59  | 95.81434   | 4.12 | 4.3%   |
| Tmem59l | 79.8842    | 2.95 | 3.7%   |
| Tmem60  | 17.54494   | 0.60 | 3.4%   |
| Tmem62  | 11.73342   | 0.53 | 4.5%   |
| Tmem63a | 0.5067894  | 0.12 | 23.7%  |
| Tmem63b | 51.67516   | 1.08 | 2.1%   |
| Tmem63c | 7.28094    | 0.11 | 1.5%   |
| Tmem64  | 8.131264   | 0.60 | 7.4%   |
| Tmem65  | 48.74952   | 0.43 | 0.9%   |
| Tmem66  | 132.1126   | 3.10 | 2.3%   |
| Tmem67  | 3.104174   | 0.27 | 8.6%   |
| Tmem68  | 12.8309    | 1.09 | 8.5%   |
| Tmem69  | 4.613212   | 0.27 | 5.8%   |
| Tmem70  | 21.2711    | 1.38 | 6.5%   |
| Tmem71  | 0.00636952 | 0.01 | 138.1% |
| Tmem74  | 2.4199     | 0.29 | 11.8%  |
| Tmem77  | 12.3795    | 0.63 | 5.1%   |
| Tmem79  | 0.380747   | 0.10 | 25.9%  |
| Tmem8   | 2.861288   | 0.27 | 9.3%   |
| Tmem80  | 6.407704   | 0.37 | 5.7%   |
| Tmem81  | 0.2923524  | 0.08 | 27.5%  |
| Tmem82  | 0.0466229  | 0.02 | 47.2%  |

|           |             |       |        |
|-----------|-------------|-------|--------|
| Tmem85    | 67.51778    | 4.04  | 6.0%   |
| Tmem86a   | 3.29638     | 0.40  | 12.3%  |
| Tmem86b   | 1.953762    | 0.31  | 15.6%  |
| Tmem87a   | 19.7673     | 1.16  | 5.9%   |
| Tmem87b   | 14.43842    | 0.43  | 3.0%   |
| Tmem88    | 0.1648672   | 0.02  | 13.2%  |
| Tmem9     | 51.99374    | 2.42  | 4.7%   |
| Tmem90a   | 2.84401     | 0.32  | 11.3%  |
| Tmem91    | 33.67138    | 3.05  | 9.0%   |
| Tmem92    | 0           | 0.00  |        |
| Tmem93    | 21.38388    | 1.02  | 4.8%   |
| Tmem97    | 7.428564    | 0.44  | 5.9%   |
| Tmem98    | 1.707184    | 0.29  | 16.9%  |
| Tmem9b    | 24.2713     | 1.24  | 5.1%   |
| Tmepai    | 6.007826    | 0.38  | 6.3%   |
| Tmf1      | 10.111354   | 0.39  | 3.9%   |
| Tmhs      | 1.839126    | 0.14  | 7.4%   |
| Tmie      | 0.3432082   | 0.09  | 25.5%  |
| Tmigd1    | 0           | 0.00  |        |
| Tmlhe     | 0           | 0.00  |        |
| Tmod1     | 0.642746    | 0.16  | 25.7%  |
| Tmod2     | 64.03606    | 2.82  | 4.4%   |
| Tmod3     | 4.902612    | 0.24  | 4.9%   |
| Tmod4     | 0.0352293   | 0.03  | 79.1%  |
| Tmpo      | 11.12714    | 0.66  | 5.9%   |
| Tmprss11a | 0           | 0.00  |        |
| Tmprss11b | 0.00319138  | 0.01  | 223.6% |
| Tmprss11c | 0           | 0.00  |        |
| Tmprss11d | 0.00802118  | 0.01  | 143.3% |
| Tmprss11e | 0.00492812  | 0.01  | 140.4% |
| Tmprss11f | 0           | 0.00  |        |
| Tmprss12  | 0           | 0.00  |        |
| Tmprss13  | 0.0023692   | 0.01  | 223.6% |
| Tmprss2   | 0.3783644   | 0.11  | 29.5%  |
| Tmprss3   | 0           | 0.00  |        |
| Tmprss4   | 0.00250802  | 0.01  | 223.6% |
| Tmprss5   | 0.014340798 | 0.01  | 70.8%  |
| Tmprss6   | 0.018253216 | 0.01  | 74.8%  |
| Tmprss7   | 0.08292006  | 0.04  | 45.9%  |
| Tmprss8   | 0           | 0.00  |        |
| Tmprss9   | 0.07298846  | 0.03  | 34.6%  |
| Tmsb10    | 67.15032    | 7.96  | 11.9%  |
| Tmsb4x    | 454.668     | 44.17 | 9.7%   |
| Tmtc1     | 2.95156     | 0.62  | 21.1%  |
| Tmtc2     | 2.366364    | 0.13  | 5.5%   |
| Tmtc3     | 2.33245     | 0.18  | 7.8%   |
| Tmtc4     | 9.07245     | 0.28  | 3.1%   |

|                 |            |      |        |
|-----------------|------------|------|--------|
| Tmub1           | 10.458684  | 0.88 | 8.4%   |
| Tmub2           | 21.98432   | 1.41 | 6.4%   |
| Tnc             | 0.9444064  | 0.21 | 22.6%  |
| Tnf             | 0          | 0.00 |        |
| Tnfaip1         | 13.1917    | 0.55 | 4.2%   |
| Tnfaip2         | 0.07969102 | 0.01 | 12.5%  |
| Tnfaip3         | 0.8778108  | 0.11 | 12.4%  |
| Tnfaip6         | 0.17271066 | 0.09 | 53.3%  |
| Tnfaip8         | 0.51063696 | 0.45 | 88.5%  |
| Tnfaip8l1       | 1.331116   | 0.16 | 12.2%  |
| Tnfaip8l2       | 0.02672798 | 0.02 | 65.4%  |
| Tnfaip8l3       | 1.348828   | 0.12 | 8.8%   |
| Tnfrh1          | 0.06963434 | 0.02 | 27.5%  |
| Tnfrsf10b       | 0.8480028  | 0.08 | 8.9%   |
| Tnfrsf11a       | 0.5504776  | 0.05 | 8.3%   |
| Tnfrsf11b       | 0.07948632 | 0.02 | 23.6%  |
| Tnfrsf12a       | 5.925086   | 0.75 | 12.6%  |
| Tnfrsf13b       | 0          | 0.00 |        |
| Tnfrsf13c       | 0.06175658 | 0.03 | 49.8%  |
| Tnfrsf14        | 0.0219213  | 0.02 | 103.9% |
| Tnfrsf17        | 0.01333562 | 0.02 | 137.0% |
| Tnfrsf18        | 0.3434676  | 0.08 | 24.6%  |
| Tnfrsf19        | 3.473972   | 0.43 | 12.3%  |
| Tnfrsf1a        | 2.320246   | 0.47 | 20.5%  |
| Tnfrsf1b        | 0.06384004 | 0.04 | 56.7%  |
| Tnfrsf21        | 34.8089    | 1.61 | 4.6%   |
| Tnfrsf22        | 0.7327458  | 0.13 | 17.8%  |
| Tnfrsf23        | 0.08241562 | 0.02 | 29.3%  |
| Tnfrsf25        | 0.4292964  | 0.18 | 41.5%  |
| Tnfrsf26        | 0.02648274 | 0.03 | 123.5% |
| Tnfrsf4         | 0.08930288 | 0.03 | 37.5%  |
| Tnfrsf8         | 0.01361572 | 0.01 | 60.3%  |
| Tnfrsf9         | 0.01098948 | 0.01 | 94.8%  |
| Tnfsf10         | 0.00877262 | 0.01 | 99.0%  |
| Tnfsf11         | 0.03446992 | 0.02 | 59.2%  |
| Tnfsf12         | 0.3472042  | 0.20 | 58.4%  |
| Tnfsf12-tnfsf13 | 0.3852752  | 0.19 | 50.2%  |
| Tnfsf13         | 0.30931824 | 0.24 | 78.0%  |
| Tnfsf13b        | 0.10016662 | 0.04 | 37.7%  |
| Tnfsf14         | 0.00381374 | 0.01 | 223.6% |
| Tnfsf15         | 0          | 0.00 |        |
| Tnfsf18         | 0.00814134 | 0.01 | 137.0% |
| Tnfsf4          | 0.00378874 | 0.01 | 223.6% |
| Tnfsf5ip1       | 9.995326   | 0.68 | 6.8%   |
| Tnfsf8          | 0.00664528 | 0.01 | 138.6% |
| Tnfsf9          | 0.4620204  | 0.18 | 38.0%  |
| Tnip1           | 8.621208   | 0.36 | 4.2%   |

|          |             |      |        |
|----------|-------------|------|--------|
| Tnip2    | 2.828858    | 0.35 | 12.5%  |
| Tnip3    | 0.00292136  | 0.01 | 223.6% |
| Tnk1     | 0.5666704   | 0.68 | 119.4% |
| Tnk2     | 22.34662    | 2.49 | 11.1%  |
| Tnks     | 67.56442    | 2.68 | 4.0%   |
| Tnks1bp1 | 5.653474    | 0.14 | 2.5%   |
| Tnks2    | 74.44796    | 4.00 | 5.4%   |
| Tnmd     | 0.536183    | 0.13 | 23.9%  |
| Tnn      | 0.003997242 | 0.00 | 99.1%  |
| Tnnc1    | 1.268702    | 0.11 | 9.0%   |
| Tnnc2    | 0.03557562  | 0.06 | 174.9% |
| Tnni1    | 0.03545908  | 0.04 | 113.8% |
| Tnni2    | 0.00800834  | 0.02 | 223.6% |
| Tnni3    | 0.05297104  | 0.04 | 77.2%  |
| Tnni3k   | 0.0041926   | 0.01 | 223.6% |
| Tnnt1    | 0.590163    | 0.15 | 25.8%  |
| Tnnt2    | 0.1661678   | 0.06 | 37.0%  |
| Tnnt3    | 0.02981278  | 0.01 | 35.3%  |
| Tnp1     | 0.01620264  | 0.04 | 223.6% |
| Tnp2     | 0.00723626  | 0.02 | 223.6% |
| Tnp01    | 10.265828   | 0.73 | 7.1%   |
| Tnp02    | 43.59248    | 0.92 | 2.1%   |
| Tnp03    | 20.16312    | 0.83 | 4.1%   |
| Tnr      | 6.024824    | 0.77 | 12.9%  |
| Tnrc15   | 17.50894    | 1.06 | 6.1%   |
| Tnrc18   | 15.09456    | 2.57 | 17.0%  |
| Tnrc4    | 5.790098    | 0.55 | 9.5%   |
| Tnrc5    | 15.97922    | 0.64 | 4.0%   |
| Tnrc6a   | 20.05888    | 0.68 | 3.4%   |
| Tnrc6b   | 8.90796     | 0.69 | 7.7%   |
| Tnrc6c   | 9.733018    | 0.74 | 7.6%   |
| Tns1     | 0.6335114   | 0.48 | 76.2%  |
| Tns3     | 3.536408    | 0.14 | 3.9%   |
| Tns4     | 0.033161916 | 0.02 | 59.0%  |
| Tnxb     | 0.02120676  | 0.01 | 32.1%  |
| Tob1     | 6.787006    | 0.65 | 9.5%   |
| Tob2     | 3.703008    | 0.21 | 5.8%   |
| Toe1     | 4.56399     | 0.29 | 6.4%   |
| Tollip   | 51.30236    | 0.89 | 1.7%   |
| Tom1     | 0.05522414  | 0.06 | 102.3% |
| Tom1l1   | 4.195654    | 0.58 | 13.9%  |
| Tom1l2   | 45.88278    | 2.25 | 4.9%   |
| Tom40    | 0.1240372   | 0.02 | 14.2%  |
| Tomm20   | 11.976448   | 1.55 | 12.9%  |
| Tomm22   | 35.82968    | 3.81 | 10.6%  |
| Tomm34   | 11.58194    | 0.73 | 6.3%   |
| Tomm40   | 27.61156    | 1.10 | 4.0%   |

|          |             |       |        |
|----------|-------------|-------|--------|
| Tomm40l  | 11.83664    | 1.13  | 9.5%   |
| Tomm7    | 34.2158     | 1.37  | 4.0%   |
| Tomm70a  | 81.43522    | 2.37  | 2.9%   |
| Top1     | 19.56012    | 0.41  | 2.1%   |
| Top1mt   | 6.008926    | 0.31  | 5.2%   |
| Top2a    | 2.60646     | 0.66  | 25.3%  |
| Top2b    | 32.7154     | 2.43  | 7.4%   |
| Top3a    | 1.216459    | 0.22  | 18.3%  |
| Top3b    | 8.637002    | 0.66  | 7.6%   |
| Topbp1   | 4.19674     | 0.11  | 2.6%   |
| Topors   | 6.138168    | 0.14  | 2.3%   |
| Tor1a    | 10.082292   | 0.78  | 7.7%   |
| Tor1aip1 | 3.588846    | 0.68  | 19.0%  |
| Tor1aip2 | 4.956356    | 0.79  | 16.0%  |
| Tor1b    | 5.312916    | 0.32  | 6.1%   |
| Tor2a    | 4.537528    | 0.96  | 21.1%  |
| Tor3a    | 0.327972    | 0.11  | 34.4%  |
| Tox      | 9.166734    | 0.25  | 2.7%   |
| Tox2     | 9.343396    | 0.64  | 6.9%   |
| Tox3     | 9.13428     | 0.42  | 4.6%   |
| Tox4     | 13.4656     | 0.84  | 6.3%   |
| Tp73l    | 0.004358746 | 0.00  | 102.1% |
| Tpbg     | 0.9637032   | 0.44  | 45.6%  |
| Tpbpa    | 0           | 0.00  |        |
| Tpbpb    | 0           | 0.00  |        |
| Tpcn1    | 3.648572    | 0.59  | 16.2%  |
| Tpcn2    | 0.546179    | 0.09  | 15.7%  |
| Tpd52    | 12.59072    | 1.02  | 8.1%   |
| Tpd52l1  | 5.128518    | 0.18  | 3.4%   |
| Tpd52l2  | 18.51762    | 0.24  | 1.3%   |
| Tph1     | 0           | 0.00  |        |
| Tph2     | 0.02332482  | 0.03  | 120.9% |
| Tpi1     | 126.6574    | 14.70 | 11.6%  |
| Tpk1     | 2.388016    | 0.21  | 8.7%   |
| Tpm1     | 24.07234    | 1.79  | 7.4%   |
| Tpm2     | 0.983258    | 0.15  | 14.8%  |
| Tpm3     | 17.1969     | 1.81  | 10.5%  |
| Tpm4     | 7.45311     | 0.77  | 10.3%  |
| Tpmt     | 2.568956    | 0.30  | 11.6%  |
| Tpo      | 0.042172    | 0.03  | 65.2%  |
| Tpp1     | 13.22514    | 0.37  | 2.8%   |
| Tpp2     | 24.49248    | 0.72  | 3.0%   |
| Tppp     | 41.77644    | 4.18  | 10.0%  |
| Tppp3    | 44.80066    | 4.18  | 9.3%   |
| Tpr      | 19.80798    | 1.33  | 6.7%   |
| Tprkb    | 22.29798    | 0.79  | 3.5%   |
| Tpsab1   | 0           | 0.00  |        |



|              |            |      |        |
|--------------|------------|------|--------|
| Tpsb2        | 0.00445704 | 0.01 | 223.6% |
| Tpsg1        | 0.52600502 | 1.04 | 198.1% |
| Tpst1        | 8.180056   | 0.38 | 4.6%   |
| Tpst2        | 5.27773    | 0.32 | 6.1%   |
| Tpte         | 0          | 0.00 |        |
| Tpte2        | 13.13054   | 0.84 | 6.4%   |
| Tpx2         | 1.2214264  | 0.23 | 18.5%  |
| Tra2a        | 26.49018   | 0.59 | 2.2%   |
| Trabd        | 11.19396   | 0.76 | 6.8%   |
| TRAD/RAD51L3 | 1.67876326 | 0.92 | 54.6%  |
| Tradd        | 2.76469    | 0.12 | 4.4%   |
| TRADV13-4    | 0          | 0.00 |        |
| TRADV14D-3   | 0          | 0.00 |        |
| TRADV15D-2   | 0          | 0.00 |        |
| TRADV16D     | 0          | 0.00 |        |
| TRADV4-4     | 0          | 0.00 |        |
| Traf1        | 0.01737454 | 0.01 | 75.2%  |
| Traf2        | 1.705006   | 0.23 | 13.7%  |
| Traf3        | 33.16236   | 1.75 | 5.3%   |
| Traf3ip1     | 4.763886   | 0.25 | 5.3%   |
| Traf3ip2     | 0.6123546  | 0.15 | 24.9%  |
| Traf3ip3     | 0.0678047  | 0.04 | 57.9%  |
| traf4        | 3.683506   | 0.61 | 16.6%  |
| Traf4        | 3.142216   | 0.29 | 9.3%   |
| Traf5        | 0.06953908 | 0.05 | 73.0%  |
| Traf6        | 1.83601    | 0.18 | 9.6%   |
| Traf7        | 11.86666   | 0.79 | 6.6%   |
| Trafd1       | 11.8695    | 0.31 | 2.6%   |
| Traip        | 0.4155278  | 0.08 | 20.0%  |
| Traits       | 0.05113434 | 0.02 | 41.0%  |
| Trak1        | 17.8373    | 0.73 | 4.1%   |
| Trak2        | 14.34738   | 0.32 | 2.2%   |
| Tram1        | 16.0187    | 0.75 | 4.7%   |
| Tram1l1      | 17.97494   | 1.70 | 9.5%   |
| Tram2        | 0.5525832  | 0.13 | 22.7%  |
| Trap1        | 22.48538   | 1.14 | 5.1%   |
| Trap1a       | 4.177794   | 0.53 | 12.8%  |
| Trappc1      | 26.6873    | 2.67 | 10.0%  |
| Trappc2      | 10.048906  | 0.86 | 8.6%   |
| Trappc2l     | 37.69234   | 2.16 | 5.7%   |
| Trappc3      | 35.49528   | 1.83 | 5.1%   |
| Trappc4      | 30.57432   | 3.74 | 12.2%  |
| Trappc5      | 10.048232  | 0.25 | 2.5%   |
| Trappc6a     | 9.150966   | 1.15 | 12.6%  |
| Trappc6b     | 22.69396   | 1.48 | 6.5%   |
| Trat1        | 0.00778774 | 0.02 | 223.6% |
| TRAV10       | 0          | 0.00 |        |

|           |            |      |        |
|-----------|------------|------|--------|
| TRAV10D   | 0          | 0.00 |        |
| Trav11    | 0          | 0.00 |        |
| TRAV12-3  | 0          | 0.00 |        |
| TRAV13D-2 | 0          | 0.00 |        |
| TRAV14-1  | 0          | 0.00 |        |
| TRAV14-2  | 0          | 0.00 |        |
| TRAV17    | 0          | 0.00 |        |
| TRAV19    | 0.0120389  | 0.03 | 223.6% |
| TRAV2     | 0          | 0.00 |        |
| TRAV3-3   | 0.04069168 | 0.06 | 141.6% |
| TRAV4-2   | 0          | 0.00 |        |
| TRAV4D-3  | 0.01727194 | 0.04 | 223.6% |
| TRAV4D-4  | 0          | 0.00 |        |
| TRAV5D-4  | 0          | 0.00 |        |
| TRAV6-3   | 0          | 0.00 |        |
| TRAV6-6   | 0          | 0.00 |        |
| TRAV6-7   | 0          | 0.00 |        |
| TRAV6D-6  | 0          | 0.00 |        |
| TRAV6D-7  | 0          | 0.00 |        |
| TRAV7-5   | 0          | 0.00 |        |
| TRAV7D-4  | 0          | 0.00 |        |
| TRAV8D-2  | 0          | 0.00 |        |
| Trcg1     | 0.00222456 | 0.00 | 223.6% |
| Trdmt1    | 1.824282   | 0.10 | 5.4%   |
| Trdn      | 0.0107846  | 0.02 | 139.3% |
| TRDV2-2   | 0          | 0.00 |        |
| TRDV5     | 0.01264386 | 0.03 | 223.6% |
| Treh      | 0          | 0.00 |        |
| Trem1     | 0          | 0.00 |        |
| Trem2     | 0          | 0.00 |        |
| Trem3     | 0.0420014  | 0.03 | 72.8%  |
| Trem11    | 0          | 0.00 |        |
| Trem12    | 0          | 0.00 |        |
| Trem14    | 0.00614078 | 0.01 | 137.3% |
| Trerf1    | 3.197108   | 0.25 | 7.7%   |
| Trex1     | 3.679      | 0.34 | 9.3%   |
| Trex2     | 0.00538842 | 0.01 | 223.6% |
| Trf       | 0.0354257  | 0.02 | 67.8%  |
| Trfr2     | 1.50873    | 0.13 | 8.9%   |
| Trh       | 0.0522966  | 0.03 | 54.0%  |
| Trhde     | 5.212906   | 0.24 | 4.6%   |
| Trhr      | 6.875692   | 0.30 | 4.3%   |
| Trhr2     | 0.6124098  | 0.16 | 25.4%  |
| Triad2    | 6.790884   | 1.19 | 17.6%  |
| Triap1    | 12.7782    | 1.13 | 8.9%   |
| Trib1     | 0.6453394  | 0.07 | 10.2%  |
| Trib2     | 33.33986   | 4.12 | 12.4%  |

|             |            |      |        |
|-------------|------------|------|--------|
| Trib3       | 1.447368   | 0.22 | 15.3%  |
| Trim10      | 0.00210974 | 0.00 | 223.6% |
| Trim11      | 4.39688    | 0.41 | 9.3%   |
| Trim12      | 0          | 0.00 |        |
| Trim13      | 3.526794   | 0.58 | 16.6%  |
| Trim14      | 0.03824044 | 0.04 | 99.5%  |
| Trim15      | 0.2065726  | 0.08 | 40.7%  |
| Trim16      | 0.0597758  | 0.04 | 74.4%  |
| Trim17      | 2.302268   | 0.15 | 6.6%   |
| Trim2       | 38.31034   | 0.76 | 2.0%   |
| Trim21      | 0.4460392  | 0.06 | 13.6%  |
| Trim23      | 23.96152   | 1.23 | 5.1%   |
| Trim24      | 8.57886    | 0.45 | 5.3%   |
| Trim25      | 0.4263052  | 0.17 | 40.9%  |
| Trim26      | 9.097582   | 0.34 | 3.7%   |
| Trim27      | 8.667246   | 0.52 | 6.0%   |
| Trim28      | 43.82176   | 1.61 | 3.7%   |
| Trim29      | 0.00844538 | 0.01 | 147.2% |
| Trim3       | 33.68254   | 0.71 | 2.1%   |
| Trim30      | 0.04727242 | 0.02 | 51.0%  |
| Trim30/Rpt1 | 0.05321956 | 0.06 | 118.5% |
| Trim31      | 0          | 0.00 |        |
| Trim32      | 66.39734   | 2.42 | 3.6%   |
| Trim33      | 11.17256   | 0.12 | 1.1%   |
| Trim34      | 0.5448426  | 0.13 | 24.3%  |
| Trim35      | 60.72684   | 5.52 | 9.1%   |
| Trim36      | 7.048722   | 0.91 | 12.9%  |
| Trim37      | 64.17198   | 2.08 | 3.2%   |
| Trim38      | 0.0038202  | 0.01 | 223.6% |
| Trim39      | 6.653914   | 0.34 | 5.1%   |
| Trim40      | 0.0063301  | 0.01 | 138.0% |
| Trim41      | 9.348676   | 0.69 | 7.4%   |
| Trim42      | 0.00533738 | 0.01 | 138.9% |
| Trim44      | 67.12064   | 1.21 | 1.8%   |
| Trim45      | 3.167626   | 0.15 | 4.9%   |
| Trim46      | 20.8175    | 0.70 | 3.3%   |
| Trim47      | 0.0773463  | 0.03 | 44.3%  |
| Trim50      | 0          | 0.00 |        |
| Trim52      | 0          | 0.00 |        |
| Trim54      | 0          | 0.00 |        |
| Trim55      | 0.00261666 | 0.01 | 223.6% |
| Trim56      | 0.44826    | 0.15 | 32.9%  |
| Trim58      | 0          | 0.00 |        |
| Trim59      | 2.143332   | 0.28 | 13.0%  |
| Trim6       | 0.03731204 | 0.04 | 107.4% |
| Trim60      | 0          | 0.00 |        |
| Trim61      | 0.0030801  | 0.01 | 223.6% |

|           |            |      |        |
|-----------|------------|------|--------|
| Trim62    | 10.80408   | 0.89 | 8.2%   |
| Trim63    | 0.02090794 | 0.03 | 152.6% |
| Trim65    | 0.6830804  | 0.10 | 14.6%  |
| Trim66    | 3.23752    | 0.25 | 7.6%   |
| Trim67    | 2.42393    | 0.64 | 26.4%  |
| Trim68    | 0.5711296  | 0.07 | 11.6%  |
| Trim69    | 0.02990954 | 0.01 | 34.8%  |
| Trim7     | 0.6347948  | 0.11 | 17.2%  |
| Trim71    | 0.2438752  | 0.06 | 23.7%  |
| Trim72    | 0.2948814  | 0.09 | 31.3%  |
| Trim75    | 0.02389412 | 0.01 | 44.7%  |
| Trim8     | 20.52196   | 1.09 | 5.3%   |
| Trim9     | 31.87758   | 1.31 | 4.1%   |
| Triml1    | 0.00548836 | 0.01 | 137.4% |
| Trio      | 18.90992   | 0.69 | 3.6%   |
| Triobp    | 3.483114   | 0.63 | 18.0%  |
| Trip10    | 1.2058624  | 0.28 | 22.9%  |
| Trip11    | 4.411556   | 0.25 | 5.7%   |
| Trip12    | 29.01262   | 1.27 | 4.4%   |
| Trip13    | 0.5062656  | 0.11 | 22.2%  |
| Trip4     | 6.466178   | 0.29 | 4.5%   |
| Trip6     | 2.227298   | 0.25 | 11.2%  |
| Trit1     | 3.6352     | 0.23 | 6.3%   |
| trkC      | 3.29577    | 0.60 | 18.3%  |
| TrkC      | 2.73269    | 0.49 | 17.8%  |
| Trm6      | 0.464935   | 0.23 | 48.5%  |
| Trmt1     | 18.59804   | 0.66 | 3.5%   |
| Trmt11    | 1.902496   | 0.17 | 8.8%   |
| Trmt12    | 1.97642    | 0.16 | 8.0%   |
| Trmt5     | 5.137158   | 0.23 | 4.5%   |
| Trmt6     | 4.611426   | 0.59 | 12.8%  |
| Trmu      | 8.608306   | 0.33 | 3.9%   |
| Trnt1     | 19.24758   | 0.60 | 3.1%   |
| Tro       | 56.36142   | 2.08 | 3.7%   |
| Troap     | 0.3059386  | 0.08 | 27.6%  |
| Trove2    | 7.109494   | 0.61 | 8.6%   |
| Trp2      | 1.1588854  | 0.27 | 23.0%  |
| trp3      | 0.9684892  | 0.24 | 25.2%  |
| trp4      | 0.355844   | 0.13 | 36.4%  |
| Trp53     | 6.050204   | 0.53 | 8.7%   |
| Trp53bp1  | 36.61072   | 3.79 | 10.3%  |
| Trp53bp2  | 2.165814   | 0.15 | 6.8%   |
| Trp53i11  | 4.537008   | 0.22 | 4.9%   |
| Trp53i13  | 1.480706   | 0.26 | 17.3%  |
| Trp53inp1 | 8.204874   | 1.04 | 12.7%  |
| Trp53inp2 | 37.64058   | 1.26 | 3.4%   |
| Trp53rk   | 0.4582276  | 0.10 | 22.5%  |

|             |             |       |        |
|-------------|-------------|-------|--------|
| Trp63       | 0.004859878 | 0.01  | 134.0% |
| Trp73       | 0.04176648  | 0.02  | 50.7%  |
| Trpa1       | 0.1797998   | 0.04  | 20.7%  |
| Trpc1       | 5.304378    | 0.48  | 9.0%   |
| TRPC1A-Beta | 0.3275028   | 0.18  | 56.2%  |
| Trpc2       | 2.215638    | 0.47  | 21.1%  |
| Trpc3       | 6.707216    | 0.26  | 3.9%   |
| Trpc4       | 1.1842508   | 0.18  | 14.9%  |
| Trpc4ap     | 63.87188    | 1.60  | 2.5%   |
| Trpc5       | 4.78455     | 0.60  | 12.5%  |
| Trpc6       | 0.5896774   | 0.08  | 12.9%  |
| Trpc7       | 0.4396146   | 0.11  | 25.8%  |
| Trpd52l3    | 0           | 0.00  |        |
| Trpm1       | 0.01495088  | 0.03  | 177.4% |
| Trpm2       | 2.214952    | 0.39  | 17.6%  |
| Trpm3       | 5.717262    | 1.06  | 18.6%  |
| Trpm4       | 1.985354    | 0.23  | 11.4%  |
| Trpm5       | 0.1571732   | 0.04  | 24.3%  |
| Trpm6       | 0.165189    | 0.04  | 26.6%  |
| Trpm7       | 8.56702     | 0.85  | 10.0%  |
| Trpm8       | 0.02790062  | 0.01  | 36.9%  |
| Trps1       | 1.272818    | 0.11  | 8.6%   |
| Trpt1       | 3.262164    | 0.98  | 30.1%  |
| Trpv1       | 0.01942688  | 0.01  | 36.6%  |
| Trpv2       | 1.979186    | 0.24  | 12.3%  |
| Trpv3       | 0.02687264  | 0.02  | 86.8%  |
| Trpv4       | 0.03064849  | 0.02  | 62.5%  |
| Trpv5       | 0           | 0.00  |        |
| Trpv6       | 0.2572652   | 0.02  | 9.4%   |
| Trrap       | 7.721108    | 0.38  | 4.9%   |
| Trspap1     | 4.986692    | 0.40  | 8.0%   |
| Trub1       | 6.798426    | 0.50  | 7.4%   |
| Trub2       | 9.520362    | 0.20  | 2.1%   |
| Try10       | 0           | 0.00  |        |
| Try4        | 0           | 0.00  |        |
| Tsarg1      | 0           | 0.00  |        |
| Tsarg7      | 1.1867796   | 0.28  | 23.5%  |
| Tsc1        | 13.49994    | 0.87  | 6.5%   |
| Tsc2        | 17.98832    | 1.01  | 5.6%   |
| Tsc22d1     | 141.39      | 10.24 | 7.2%   |
| Tsc22d2     | 10.197622   | 0.38  | 3.7%   |
| Tsc22d3     | 40.4051     | 2.78  | 6.9%   |
| Tsc22d4     | 5.114984    | 0.58  | 11.3%  |
| tsec-1      | 1.302024    | 0.17  | 13.3%  |
| Tsen2       | 4.998768    | 0.33  | 6.6%   |
| Tsen34      | 23.1162     | 1.44  | 6.2%   |
| Tsen54      | 2.865992    | 0.36  | 12.7%  |

|          |            |       |        |
|----------|------------|-------|--------|
| Tsfm     | 9.266498   | 1.06  | 11.4%  |
| Tsg101   | 13.34522   | 0.84  | 6.3%   |
| Tsg118   | 0.8525044  | 1.13  | 132.8% |
| Tsga10   | 2.393566   | 0.16  | 6.5%   |
| Tsga10ip | 0.0093703  | 0.02  | 223.6% |
| Tsga13   | 0          | 0.00  |        |
| Tsga14   | 2.296238   | 0.30  | 13.3%  |
| Tsga8    | 0          | 0.00  |        |
| Tshb     | 0.058666   | 0.05  | 91.9%  |
| Tshr     | 0.3345522  | 0.06  | 16.5%  |
| Tshz1    | 10.045288  | 0.78  | 7.7%   |
| Tshz2    | 35.0198    | 1.65  | 4.7%   |
| Tshz3    | 8.126212   | 0.35  | 4.3%   |
| Tsku     | 1.049387   | 0.21  | 20.1%  |
| Tslp     | 0.27042584 | 0.12  | 43.1%  |
| Tsn      | 37.3477    | 2.20  | 5.9%   |
| Tsnax    | 0          | 0.00  |        |
| Tsnaxip1 | 0.02775878 | 0.02  | 82.5%  |
| Tsp50    | 0.01476744 | 0.02  | 147.7% |
| Tspan1   | 0.13640082 | 0.05  | 34.6%  |
| Tspan10  | 0          | 0.00  |        |
| Tspan11  | 0.7982     | 0.26  | 32.2%  |
| Tspan12  | 13.04348   | 0.49  | 3.8%   |
| Tspan13  | 105.4022   | 9.97  | 9.5%   |
| Tspan14  | 5.628136   | 0.37  | 6.6%   |
| Tspan15  | 0.621947   | 0.11  | 18.4%  |
| Tspan17  | 40.15558   | 2.22  | 5.5%   |
| Tspan18  | 8.677734   | 0.87  | 10.0%  |
| Tspan2   | 18.60582   | 1.28  | 6.9%   |
| Tspan3   | 149.7024   | 2.86  | 1.9%   |
| tspan-3  | 0.11990326 | 0.05  | 41.3%  |
| Tspan31  | 25.88182   | 1.52  | 5.9%   |
| Tspan32  | 0.01141314 | 0.02  | 156.5% |
| Tspan33  | 3.629782   | 0.40  | 11.1%  |
| Tspan4   | 11.212142  | 1.39  | 12.4%  |
| Tspan5   | 42.20816   | 1.59  | 3.8%   |
| Tspan6   | 29.36962   | 3.14  | 10.7%  |
| Tspan7   | 366.6254   | 13.17 | 3.6%   |
| Tspan8   | 1.555014   | 0.56  | 35.9%  |
| Tspan9   | 16.04348   | 1.31  | 8.2%   |
| Tspo     | 0.2764746  | 0.12  | 43.6%  |
| Tspyl1   | 56.17282   | 2.29  | 4.1%   |
| Tspyl2   | 45.92146   | 3.28  | 7.1%   |
| Tspyl3   | 15.07334   | 0.21  | 1.4%   |
| Tspyl4   | 205.8738   | 1.63  | 0.8%   |
| Tspyl5   | 11.56284   | 0.82  | 7.1%   |
| Tsr1     | 10.6479    | 0.69  | 6.5%   |

|         |            |       |        |
|---------|------------|-------|--------|
| Tsr2    | 17.65986   | 0.61  | 3.4%   |
| Tssc1   | 12.0632    | 0.94  | 7.8%   |
| Tssc4   | 16.65386   | 0.94  | 5.6%   |
| Tssk1   | 0.05136374 | 0.04  | 84.3%  |
| Tssk2   | 0.02188314 | 0.02  | 88.0%  |
| Tssk3   | 0.00460128 | 0.01  | 223.6% |
| Tssk4   | 0.0353777  | 0.04  | 114.4% |
| Tssk5   | 0          | 0.00  |        |
| Tssk6   | 1.640776   | 0.16  | 9.7%   |
| Tst     | 1.993006   | 0.65  | 32.8%  |
| Tsta3   | 10.87488   | 0.82  | 7.5%   |
| Tsx     | 0.05610492 | 0.05  | 86.1%  |
| Ttbk1   | 11.0364    | 0.41  | 3.7%   |
| Ttbk2   | 23.84082   | 1.43  | 6.0%   |
| Ttc1    | 19.5004    | 0.57  | 2.9%   |
| Ttc12   | 0.1747892  | 0.01  | 5.4%   |
| Ttc13   | 14.49112   | 1.26  | 8.7%   |
| Ttc14   | 13.27944   | 1.56  | 11.7%  |
| Ttc15   | 17.97238   | 0.65  | 3.6%   |
| Ttc16   | 1.1912432  | 0.42  | 35.2%  |
| Ttc17   | 10.253982  | 0.41  | 4.0%   |
| Ttc19   | 19.85828   | 0.43  | 2.2%   |
| Ttc21a  | 0.2023128  | 0.03  | 14.2%  |
| Ttc21b  | 4.289178   | 0.23  | 5.5%   |
| Ttc22   | 0.1741612  | 0.04  | 23.8%  |
| Ttc23   | 0.7698802  | 0.08  | 10.1%  |
| Ttc24   | 0          | 0.00  |        |
| Ttc25   | 0.1304426  | 0.03  | 23.8%  |
| Ttc26   | 1.109752   | 0.06  | 5.2%   |
| Ttc27   | 3.449526   | 0.12  | 3.4%   |
| Ttc28   | 3.449258   | 0.27  | 7.7%   |
| Ttc29   | 0.02147202 | 0.02  | 112.3% |
| Ttc3    | 292.7848   | 14.47 | 4.9%   |
| Ttc30a1 | 1.473808   | 0.08  | 5.6%   |
| Ttc30a2 | 0.10767924 | 0.05  | 45.6%  |
| Ttc30b  | 2.989726   | 0.09  | 2.9%   |
| Ttc32   | 1.161327   | 0.25  | 21.9%  |
| Ttc33   | 25.19252   | 1.80  | 7.2%   |
| Ttc35   | 28.54636   | 1.23  | 4.3%   |
| Ttc4    | 15.86364   | 0.77  | 4.9%   |
| Ttc5    | 4.230578   | 0.33  | 7.8%   |
| Ttc7    | 0.5174594  | 0.06  | 11.5%  |
| Ttc8    | 6.115968   | 0.37  | 6.1%   |
| Ttc9    | 23.19594   | 0.79  | 3.4%   |
| Ttc9b   | 52.83264   | 3.45  | 6.5%   |
| Ttc9c   | 18.38152   | 0.15  | 0.8%   |
| Ttf1    | 1.297828   | 0.16  | 12.0%  |

|         |             |       |        |
|---------|-------------|-------|--------|
| Ttf2    | 0.5125912   | 0.02  | 4.7%   |
| Ttk     | 0.592753    | 0.15  | 25.8%  |
| Ttl     | 20.03702    | 1.13  | 5.6%   |
| Ttll1   | 25.2477     | 1.57  | 6.2%   |
| Ttll10  | 0.008798808 | 0.01  | 98.5%  |
| Ttll11  | 8.132924    | 0.46  | 5.7%   |
| Ttll12  | 12.1843     | 0.60  | 4.9%   |
| Ttll13  | 0.4155774   | 0.10  | 23.6%  |
| Ttll2   | 0.01224086  | 0.01  | 94.7%  |
| Ttll3   | 1.653722    | 0.47  | 28.4%  |
| Ttll4   | 1.235528    | 0.11  | 9.2%   |
| Ttll5   | 2.664768    | 0.19  | 7.3%   |
| Ttll6   | 0.03447588  | 0.01  | 34.7%  |
| Ttll7s  | 17.93536    | 1.51  | 8.4%   |
| Ttll9   | 1.034099    | 0.11  | 10.4%  |
| Ttn     | 0.032392416 | 0.03  | 87.6%  |
| Ttpa    | 0.5425434   | 0.12  | 22.6%  |
| Ttr     | 0.8390596   | 0.30  | 36.2%  |
| Ttrap   | 6.419602    | 0.30  | 4.6%   |
| Ttyh1   | 25.55486    | 1.08  | 4.2%   |
| Ttyh2   | 1.07224     | 0.07  | 6.2%   |
| Ttyh3   | 41.65634    | 2.51  | 6.0%   |
| Tub     | 18.91156    | 0.63  | 3.3%   |
| Tuba1a  | 436.6058    | 61.60 | 14.1%  |
| Tuba1b  | 74.13428    | 5.07  | 6.8%   |
| Tuba1c  | 12.61432    | 1.91  | 15.2%  |
| Tuba3a  | 0.00300838  | 0.01  | 223.6% |
| Tuba3b  | 0.01610538  | 0.02  | 144.2% |
| Tuba4a  | 172.941     | 7.62  | 4.4%   |
| Tuba8   | 0.2613252   | 0.05  | 20.6%  |
| Tuba13  | 0           | 0.00  |        |
| Tubb1   | 0.00394516  | 0.01  | 223.6% |
| Tubb2a  | 191.475     | 10.95 | 5.7%   |
| Tubb2b  | 135.3444    | 30.68 | 22.7%  |
| Tubb2c  | 89.65968    | 3.67  | 4.1%   |
| Tubb3   | 404.603     | 40.50 | 10.0%  |
| Tubb4   | 115.179     | 6.38  | 5.5%   |
| Tubb5   | 401.332     | 40.69 | 10.1%  |
| Tubb6   | 3.212962    | 0.20  | 6.2%   |
| Tubd1   | 1.540066    | 0.14  | 9.4%   |
| Tube1   | 1.16935     | 0.18  | 15.7%  |
| Tubg1   | 17.3413     | 0.81  | 4.7%   |
| tubg1   | 0.445157    | 0.17  | 39.0%  |
| Tubg2   | 10.511728   | 0.65  | 6.1%   |
| Tubgcp2 | 14.15368    | 0.33  | 2.3%   |
| Tubgcp3 | 11.5052     | 0.75  | 6.5%   |
| Tubgcp4 | 11.367866   | 4.63  | 40.7%  |



|         |             |      |        |
|---------|-------------|------|--------|
| Tubgcp5 | 10.33909    | 0.56 | 5.4%   |
| Tubgcp6 | 4.795648    | 0.46 | 9.5%   |
| Tuc1    | 1.926006    | 0.45 | 23.4%  |
| Tufm    | 2.709524    | 0.18 | 6.6%   |
| Tuft1   | 1.68789     | 0.13 | 7.6%   |
| Tulp1   | 0.003834792 | 0.01 | 147.3% |
| Tulp2   | 0.01937224  | 0.02 | 122.7% |
| Tulp3   | 3.864006    | 0.36 | 9.3%   |
| Tulp4   | 0.14813     | 0.02 | 16.6%  |
| Tusc1   | 3.189408    | 0.41 | 12.7%  |
| Tusc2   | 21.91886    | 1.35 | 6.2%   |
| Tusc3   | 106.7678    | 4.84 | 4.5%   |
| Tusc4   | 13.54832    | 0.45 | 3.3%   |
| Tusc5   | 0.12442502  | 0.03 | 23.7%  |
| Tut1    | 7.329342    | 0.30 | 4.0%   |
| Twf1    | 11.83892    | 0.67 | 5.6%   |
| Twf2    | 6.537182    | 0.55 | 8.4%   |
| Twist1  | 5.464374    | 0.43 | 7.8%   |
| Twist2  | 0.4302992   | 0.13 | 29.3%  |
| Twistnb | 5.175536    | 0.73 | 14.1%  |
| Twsg1   | 9.386024    | 0.86 | 9.1%   |
| Txk     | 0           | 0.00 |        |
| Txlna   | 8.402522    | 0.28 | 3.4%   |
| Txlnb   | 0.1669358   | 0.01 | 4.9%   |
| Txlng   | 1.11553416  | 0.66 | 59.5%  |
| Txn1    | 57.48372    | 1.87 | 3.2%   |
| Txn2    | 40.1292     | 1.24 | 3.1%   |
| Txndc1  | 49.5309     | 2.19 | 4.4%   |
| Txndc10 | 20.42234    | 1.71 | 8.4%   |
| Txndc11 | 8.670316    | 0.36 | 4.1%   |
| Txndc12 | 14.75654    | 0.57 | 3.9%   |
| Txndc13 | 117.0414    | 7.59 | 6.5%   |
| Txndc14 | 47.17986    | 1.22 | 2.6%   |
| Txndc15 | 26.01738    | 0.97 | 3.7%   |
| Txndc16 | 20.32532    | 0.71 | 3.5%   |
| Txndc17 | 14.67814    | 0.95 | 6.5%   |
| Txndc2  | 0.0178474   | 0.01 | 34.8%  |
| Txndc3  | 0           | 0.00 |        |
| Txndc4  | 16.29506    | 1.07 | 6.6%   |
| Txndc5  | 28.57452    | 1.59 | 5.5%   |
| Txndc8  | 0           | 0.00 |        |
| Txndc9  | 5.30657     | 0.19 | 3.6%   |
| Txnip   | 6.490402    | 1.61 | 24.8%  |
| TxnI1   | 51.13752    | 3.24 | 6.3%   |
| TxnI4   | 0.11585174  | 0.04 | 35.5%  |
| TxnI4a  | 34.37806    | 0.85 | 2.5%   |
| TxnI4b  | 5.849436    | 0.35 | 6.0%   |

|         |             |      |        |
|---------|-------------|------|--------|
| Txnrd1  | 22.37384    | 1.57 | 7.0%   |
| TXNRD1  | 1.525925    | 1.10 | 72.0%  |
| Txnrd2  | 5.573918    | 0.55 | 9.8%   |
| Txnrd3  | 3.34548     | 0.33 | 9.7%   |
| Tyk2    | 1.472374    | 0.10 | 7.0%   |
| Tyki    | 9.890874    | 0.21 | 2.2%   |
| Tyms    | 0.5007214   | 0.04 | 7.8%   |
| Tyr     | 0           | 0.00 |        |
| Tyro3   | 9.330962    | 1.08 | 11.6%  |
| Tyrobp  | 0           | 0.00 |        |
| Tyrp1   | 0.04089552  | 0.04 | 98.7%  |
| Tysnd1  | 6.063448    | 0.72 | 11.9%  |
| Tyw1    | 3.618276    | 0.37 | 10.4%  |
| Tyw3    | 2.878804    | 0.28 | 9.9%   |
| U07657  | 0           | 0.00 |        |
| U07879  | 0           | 0.00 |        |
| U09772  | 0           | 0.00 |        |
| U20366  | 0.01751002  | 0.01 | 29.2%  |
| U20367  | 0.01601312  | 0.01 | 31.9%  |
| U20369  | 0.02600664  | 0.01 | 36.4%  |
| U2af1   | 0.9390914   | 0.12 | 12.9%  |
| U2af1l4 | 3.972816    | 0.85 | 21.5%  |
| U2af2   | 18.78584    | 0.73 | 3.9%   |
| U2af26  | 1.938226    | 0.62 | 32.2%  |
| U46068  | 0.02247648  | 0.02 | 72.6%  |
| U46581  | 0           | 0.00 |        |
| U69888  | 2.886842    | 0.44 | 15.1%  |
| U76754  | 0.07101258  | 0.08 | 113.9% |
| U80893  | 1.79179     | 0.29 | 16.0%  |
| U83174  | 5.845582    | 0.69 | 11.8%  |
| U83175  | 1.17743146  | 1.08 | 92.1%  |
| U86728  | 0           | 0.00 |        |
| U89428  | 0.06955178  | 0.06 | 93.1%  |
| U89738  | 0           | 0.00 |        |
| U96411  | 0.00288205  | 0.00 | 154.5% |
| Uaca    | 0.9765034   | 0.16 | 16.7%  |
| Uap1    | 16.17074    | 1.34 | 8.3%   |
| Uap1l1  | 6.44768     | 0.28 | 4.3%   |
| Uba52   | 0.4175114   | 0.08 | 19.8%  |
| Ubac1   | 17.13294    | 1.19 | 6.9%   |
| Ubac2   | 10.378574   | 0.33 | 3.2%   |
| Ubadc1  | 9.591802    | 1.86 | 19.4%  |
| Ubap1   | 12.57318    | 0.36 | 2.9%   |
| Ubap2   | 16.0682     | 1.27 | 7.9%   |
| Ubap2l  | 37.95496    | 1.67 | 4.4%   |
| Ubash3a | 0.001760086 | 0.00 | 223.6% |
| Ubb     | 36.30852    | 1.10 | 3.0%   |

|          |            |       |        |
|----------|------------|-------|--------|
| Ubc      | 134.70702  | 48.22 | 35.8%  |
| Ubc13    | 45.29074   | 1.45  | 3.2%   |
| Ubce7ip1 | 0.0296481  | 0.01  | 18.2%  |
| ubcM4    | 0.11567488 | 0.08  | 69.4%  |
| Ubd      | 0          | 0.00  |        |
| Ube1c    | 26.82464   | 1.15  | 4.3%   |
| Ube1dc1  | 20.46936   | 1.09  | 5.3%   |
| Ube1l    | 0.13013894 | 0.08  | 64.8%  |
| Ube1l2   | 9.386666   | 0.68  | 7.3%   |
| Ube1x    | 109.6626   | 4.61  | 4.2%   |
| Ube1y1   | 0          | 0.00  |        |
| Ube2a    | 15.30754   | 1.00  | 6.5%   |
| Ube2b    | 53.80872   | 1.92  | 3.6%   |
| Ube2c    | 1.833116   | 0.33  | 17.8%  |
| Ube2d1   | 26.13942   | 2.05  | 7.8%   |
| Ube2d2   | 22.00418   | 1.11  | 5.1%   |
| Ube2d3   | 81.92084   | 3.17  | 3.9%   |
| Ube2e1   | 23.42454   | 1.73  | 7.4%   |
| Ube2e2   | 42.47912   | 1.22  | 2.9%   |
| Ube2e3   | 24.091     | 1.57  | 6.5%   |
| Ube2f    | 9.902542   | 0.47  | 4.8%   |
| Ube2g1   | 18.78506   | 0.58  | 3.1%   |
| Ube2g2   | 11.59806   | 0.50  | 4.3%   |
| Ube2h    | 17.4352    | 0.82  | 4.7%   |
| Ube2i    | 11.65278   | 0.36  | 3.1%   |
| Ube2j1   | 58.0584    | 2.41  | 4.1%   |
| Ube2j2   | 3.5213     | 0.05  | 1.5%   |
| Ube2l3   | 39.71518   | 3.05  | 7.7%   |
| Ube2l6   | 0.7574538  | 0.18  | 23.9%  |
| Ube2m    | 57.50184   | 2.29  | 4.0%   |
| Ube2n    | 3.90464    | 1.55  | 39.6%  |
| Ube2o    | 31.50228   | 0.37  | 1.2%   |
| Ube2q1   | 23.96878   | 0.63  | 2.6%   |
| Ube2q2   | 11.1808    | 0.70  | 6.3%   |
| Ube2r2   | 20.92708   | 1.05  | 5.0%   |
| Ube2s    | 1.979128   | 0.38  | 19.1%  |
| Ube2t    | 0.9325606  | 0.16  | 17.4%  |
| Ube2u    | 0.00574536 | 0.01  | 223.6% |
| Ube2v1   | 1.806434   | 0.12  | 6.8%   |
| Ube2v2   | 11.00088   | 0.40  | 3.6%   |
| Ube2w    | 34.84324   | 2.02  | 5.8%   |
| Ube2z    | 30.01228   | 1.37  | 4.6%   |
| Ube3a    | 29.59422   | 1.96  | 6.6%   |
| Ube3b    | 15.50818   | 0.64  | 4.1%   |
| Ube3c    | 32.36502   | 1.05  | 3.2%   |
| Ube4a    | 19.38642   | 0.91  | 4.7%   |
| Ube4b    | 29.28742   | 0.73  | 2.5%   |

|         |            |       |        |
|---------|------------|-------|--------|
| Ubfd1   | 60.6828    | 1.02  | 1.7%   |
| Ubiad1  | 5.355596   | 0.25  | 4.7%   |
| Ubie    | 0.144506   | 0.03  | 19.9%  |
| Ubl3    | 47.20678   | 2.02  | 4.3%   |
| Ubl4    | 10.64613   | 0.52  | 4.9%   |
| Ubl4b   | 0          | 0.00  |        |
| Ubl5    | 10.989752  | 1.90  | 17.3%  |
| Ubl7    | 25.63334   | 2.02  | 7.9%   |
| Ublcp1  | 11.69405   | 1.23  | 10.5%  |
| Ubn1    | 6.594346   | 0.57  | 8.6%   |
| Ubox5   | 1.657722   | 0.22  | 13.4%  |
| Ubp1    | 17.38678   | 0.44  | 2.5%   |
| Ubqln1  | 66.35584   | 1.52  | 2.3%   |
| Ubqln2  | 84.35866   | 2.52  | 3.0%   |
| Ubqln3  | 0          | 0.00  |        |
| Ubqln4  | 20.93172   | 1.80  | 8.6%   |
| Ubqlnl  | 0          | 0.00  |        |
| Ubr1    | 11.29466   | 0.52  | 4.6%   |
| Ubr2    | 11.012384  | 0.75  | 6.8%   |
| Ubr5    | 18.49596   | 0.84  | 4.5%   |
| Ubsd1   | 5.182958   | 0.53  | 10.3%  |
| Ubsd2   | 8.661912   | 0.23  | 2.7%   |
| Ubtf    | 18.21696   | 0.93  | 5.1%   |
| Ubx1    | 20.1391    | 1.01  | 5.0%   |
| Ubx2    | 20.3434    | 0.95  | 4.7%   |
| Ubx3    | 0.02294442 | 0.01  | 61.1%  |
| Ubx4    | 21.50176   | 1.15  | 5.4%   |
| Ubx5    | 0.8577618  | 0.09  | 10.8%  |
| Ubx6    | 5.18797    | 0.39  | 7.6%   |
| Ubx7    | 11.252434  | 0.81  | 7.2%   |
| Ubx8    | 17.03404   | 0.88  | 5.2%   |
| Uchl1   | 437.6558   | 45.20 | 10.3%  |
| Uchl3   | 6.48497    | 0.38  | 5.9%   |
| uchl3   | 0.6899384  | 0.29  | 42.1%  |
| Uchl4   | 11.4935    | 1.71  | 14.9%  |
| Uchl5   | 22.40512   | 1.59  | 7.1%   |
| Uchl5ip | 6.323924   | 0.65  | 10.2%  |
| Uck1    | 6.054414   | 0.22  | 3.6%   |
| Uck2    | 14.43374   | 1.53  | 10.6%  |
| Uck11   | 5.821524   | 0.30  | 5.1%   |
| Ucn     | 0          | 0.00  |        |
| Ucn3    | 0.00307428 | 0.01  | 223.6% |
| Ucp1    | 0.05996326 | 0.05  | 89.3%  |
| Ucp2    | 1.287544   | 0.22  | 17.0%  |
| Ucp3    | 0.014336   | 0.01  | 82.4%  |
| UCP4    | 0.749485   | 0.28  | 37.1%  |
| Uevld   | 0.9158712  | 0.05  | 5.3%   |

|         |             |      |        |
|---------|-------------|------|--------|
| Ufc1    | 26.698      | 1.94 | 7.3%   |
| Ufd1l   | 25.54314    | 0.57 | 2.2%   |
| Ufd2    | 2.0717244   | 1.35 | 65.3%  |
| Ufm1    | 15.38658    | 0.34 | 2.2%   |
| Ugcg    | 47.70548    | 2.54 | 5.3%   |
| Ugcgl1  | 11.81204    | 0.57 | 4.8%   |
| Ugcgl2  | 8.609052    | 0.97 | 11.3%  |
| Ugdh    | 7.25193     | 0.50 | 6.9%   |
| Ugp2    | 19.46158    | 0.23 | 1.2%   |
| Ugt1a1  | 0.034326964 | 0.04 | 115.4% |
| Ugt1a10 | 0.03921778  | 0.02 | 52.1%  |
| Ugt1a2  | 0.03987368  | 0.01 | 37.4%  |
| Ugt1a5  | 0.04501746  | 0.03 | 57.3%  |
| Ugt1a6a | 0.07658792  | 0.04 | 58.7%  |
| Ugt1a6b | 0.028262833 | 0.06 | 200.1% |
| Ugt1a7c | 0.020357268 | 0.02 | 94.1%  |
| Ugt1a9  | 0.038785912 | 0.03 | 74.0%  |
| Ugt2a1  | 0.00805598  | 0.01 | 147.7% |
| Ugt2a2  | 0.001709932 | 0.00 | 175.0% |
| Ugt2a3  | 0           | 0.00 |        |
| Ugt2b1  | 0           | 0.00 |        |
| Ugt2b34 | 0.6098184   | 0.22 | 36.0%  |
| Ugt2b35 | 0.01581356  | 0.02 | 110.6% |
| Ugt2b36 | 0           | 0.00 |        |
| Ugt2b37 | 0           | 0.00 |        |
| Ugt2b38 | 0           | 0.00 |        |
| Ugt2b5  | 0           | 0.00 |        |
| Ugt3a1  | 0           | 0.00 |        |
| Ugt3a2  | 0.01194228  | 0.01 | 93.9%  |
| Ugt8a   | 2.36017     | 0.32 | 13.5%  |
| Uhmk1   | 32.55584    | 4.25 | 13.0%  |
| Uhrf1   | 0.5832264   | 0.12 | 20.2%  |
| Uhrf2   | 12.27926    | 0.58 | 4.7%   |
| Uimc1   | 2.957718    | 0.18 | 5.9%   |
| Ulbp1   | 0           | 0.00 |        |
| Ulk1    | 20.923      | 1.12 | 5.4%   |
| Ulk2    | 22.86218    | 1.33 | 5.8%   |
| Ulk3    | 4.380418    | 0.40 | 9.1%   |
| Ulk4    | 2.166066    | 0.46 | 21.1%  |
| Umod    | 0           | 0.00 |        |
| Umodl1  | 0.003571004 | 0.00 | 92.7%  |
| Umps    | 3.862358    | 0.36 | 9.4%   |
| Unc119  | 21.27256    | 1.03 | 4.9%   |
| Unc119b | 4.668906    | 0.19 | 4.1%   |
| Unc13a  | 29.83048    | 1.78 | 6.0%   |
| Unc13b  | 1.67191     | 0.12 | 7.0%   |
| Unc13c  | 2.663264    | 0.14 | 5.2%   |

|         |             |       |        |
|---------|-------------|-------|--------|
| Unc13d  | 0.015655868 | 0.01  | 42.9%  |
| Unc45a  | 11.83794    | 1.00  | 8.5%   |
| Unc45b  | 0.155059    | 0.02  | 15.5%  |
| Unc50   | 21.93394    | 1.03  | 4.7%   |
| Unc5a   | 6.323092    | 0.62  | 9.8%   |
| Unc5b   | 0.7745398   | 0.04  | 5.1%   |
| Unc5c   | 3.266648    | 0.53  | 16.3%  |
| Unc5cl  | 0.0054165   | 0.01  | 137.0% |
| Unc5d   | 6.49692     | 0.84  | 13.0%  |
| Unc84a  | 12.19342    | 0.37  | 3.0%   |
| Unc84b  | 5.201608    | 1.19  | 22.8%  |
| Unc93a  | 0.04751908  | 0.05  | 96.2%  |
| Unc93b1 | 0.50588     | 0.19  | 37.5%  |
| Uncx4.1 | 1.733118    | 0.12  | 7.1%   |
| Ung     | 1.1815564   | 0.12  | 10.5%  |
| Unk     | 4.639708    | 0.12  | 2.7%   |
| Unkl    | 2.567302    | 0.09  | 3.4%   |
| unknown | 5.951656    | 0.85  | 14.4%  |
| Uox     | 0.00757924  | 0.01  | 138.7% |
| Upb1    | 0.00362262  | 0.01  | 223.6% |
| Upf1    | 11.09208    | 0.35  | 3.2%   |
| Upf2    | 5.380836    | 0.50  | 9.2%   |
| Upf3a   | 8.404512    | 0.98  | 11.7%  |
| Upf3b   | 7.464148    | 0.18  | 2.4%   |
| Upk1a   | 1.1779      | 0.11  | 9.4%   |
| Upk1b   | 0.03229752  | 0.02  | 55.0%  |
| Upk2    | 0.01800834  | 0.03  | 144.2% |
| Upk3a   | 0.00956834  | 0.01  | 137.3% |
| Upk3b   | 0.00314952  | 0.01  | 223.6% |
| Upp1    | 0.300649    | 0.10  | 33.7%  |
| Upp2    | 3.170456    | 0.61  | 19.3%  |
| Uppt    | 3.985034    | 0.72  | 18.1%  |
| Uqcc    | 13.38158    | 0.61  | 4.6%   |
| Uqcr    | 28.75108    | 11.21 | 39.0%  |
| Uqcrb   | 21.6928     | 1.83  | 8.4%   |
| Uqcrc1  | 125.2694    | 3.33  | 2.7%   |
| Uqcrc2  | 112.794     | 2.90  | 2.6%   |
| Uqcrfs1 | 79.4401     | 1.53  | 1.9%   |
| Uqcrh   | 99.49852    | 5.62  | 5.7%   |
| Uqcrcq  | 42.90238    | 4.46  | 10.4%  |
| Urm1    | 16.39658    | 0.74  | 4.5%   |
| Uroc1   | 0           | 0.00  |        |
| Urod    | 10.407078   | 0.69  | 6.6%   |
| Uros    | 9.32846     | 0.65  | 6.9%   |
| Use1    | 16.03776    | 1.07  | 6.7%   |
| Use1l   | 1.69638     | 0.73  | 43.0%  |
| Usf1    | 11.15062    | 0.73  | 6.6%   |

|        |             |      |        |
|--------|-------------|------|--------|
| Usf2   | 10.67034    | 0.66 | 6.2%   |
| Ush1c  | 0.00711936  | 0.01 | 140.3% |
| Ush1g  | 0.04598434  | 0.02 | 39.3%  |
| Ush2a  | 0.003109862 | 0.00 | 43.9%  |
| Ush2A  | 0.000811052 | 0.00 | 223.6% |
| Ushbp1 | 0.03377748  | 0.03 | 76.9%  |
| Usmg5  | 6.27224     | 1.48 | 23.6%  |
| Uso1   | 22.09938    | 0.87 | 4.0%   |
| Usp1   | 2.03952     | 0.08 | 4.1%   |
| Usp10  | 18.87898    | 0.98 | 5.2%   |
| Usp11  | 79.09078    | 2.31 | 2.9%   |
| Usp12  | 9.598872    | 0.56 | 5.8%   |
| Usp13  | 5.464572    | 0.26 | 4.8%   |
| Usp14  | 55.17842    | 1.67 | 3.0%   |
| Usp15  | 21.45404    | 1.57 | 7.3%   |
| Usp16  | 5.639536    | 0.36 | 6.5%   |
| Usp17  | 0           | 0.00 |        |
| Usp18  | 0.1908292   | 0.07 | 36.6%  |
| Usp19  | 25.16124    | 0.97 | 3.8%   |
| Usp2   | 1.973228    | 0.19 | 9.4%   |
| Usp20  | 13.80224    | 0.51 | 3.7%   |
| Usp21  | 10.234842   | 0.35 | 3.4%   |
| Usp22  | 113.2174    | 5.01 | 4.4%   |
| Usp24  | 1.969286    | 0.49 | 25.1%  |
| Usp25  | 4.283314    | 0.14 | 3.2%   |
| Usp26  | 0.051590096 | 0.06 | 117.2% |
| Usp28  | 4.66334     | 0.24 | 5.1%   |
| Usp29  | 23.47852    | 0.70 | 3.0%   |
| Usp3   | 4.366492    | 0.18 | 4.0%   |
| Usp30  | 10.120074   | 0.20 | 1.9%   |
| Usp32  | 20.6535     | 1.27 | 6.2%   |
| Usp33  | 38.92616    | 1.71 | 4.4%   |
| Usp34  | 8.04906     | 1.50 | 18.7%  |
| Usp35  | 1.455802    | 0.32 | 21.8%  |
| Usp36  | 0.2064442   | 0.06 | 28.7%  |
| Usp37  | 4.656716    | 0.65 | 14.0%  |
| Usp38  | 7.65071     | 0.40 | 5.3%   |
| Usp39  | 11.53092    | 0.73 | 6.3%   |
| Usp4   | 16.464      | 0.66 | 4.0%   |
| Usp40  | 5.338686    | 2.34 | 43.8%  |
| Usp42  | 4.667882    | 0.15 | 3.2%   |
| Usp43  | 0.12513714  | 0.04 | 32.9%  |
| Usp44  | 0.06358294  | 0.04 | 68.5%  |
| Usp45  | 5.445494    | 0.69 | 12.6%  |
| Usp46  | 20.36862    | 0.48 | 2.3%   |
| Usp47  | 21.51112    | 0.99 | 4.6%   |
| Usp48  | 12.51566    | 1.04 | 8.3%   |

|        |            |      |        |
|--------|------------|------|--------|
| Usp49  | 2.80665    | 0.05 | 1.7%   |
| Usp5   | 62.82878   | 3.19 | 5.1%   |
| Usp50  | 0.00412792 | 0.01 | 223.6% |
| Usp52  | 4.016074   | 0.19 | 4.7%   |
| Usp53  | 2.30439    | 0.55 | 23.7%  |
| Usp54  | 4.335116   | 0.20 | 4.6%   |
| Usp6nl | 6.999496   | 0.62 | 8.9%   |
| Usp7   | 21.51338   | 0.57 | 2.7%   |
| Usp8   | 21.82242   | 0.73 | 3.3%   |
| Usp9x  | 36.61486   | 2.92 | 8.0%   |
| Usp9y  | 0          | 0.00 |        |
| Usp11  | 13.23574   | 0.53 | 4.0%   |
| Ust    | 5.286698   | 0.29 | 5.5%   |
| Utf1   | 0.01120832 | 0.02 | 145.2% |
| Utp11l | 8.309694   | 0.65 | 7.9%   |
| Utp14a | 2.86603    | 0.14 | 4.9%   |
| Utp14b | 1.277574   | 0.10 | 7.8%   |
| Utp15  | 6.953982   | 0.30 | 4.3%   |
| Utp18  | 9.293944   | 0.80 | 8.6%   |
| Utp20  | 1.77241    | 0.20 | 11.2%  |
| Utp3   | 12.24988   | 0.85 | 6.9%   |
| Utp6   | 8.135574   | 0.31 | 3.8%   |
| Utrn   | 9.451224   | 1.80 | 19.1%  |
| Uts2   | 0.01074432 | 0.02 | 223.6% |
| Uts2d  | 0.00838652 | 0.02 | 223.6% |
| Uts2r  | 0.02506908 | 0.02 | 72.3%  |
| Utx    | 7.333004   | 0.41 | 5.6%   |
| Uty    | 0.05748234 | 0.01 | 19.6%  |
| Uvrag  | 7.498892   | 0.33 | 4.4%   |
| Uxs1   | 4.37464    | 0.20 | 4.5%   |
| Uxt    | 0.6942498  | 0.19 | 27.2%  |
| V00757 | 0          | 0.00 |        |
| V00821 | 0          | 0.00 |        |
| V1ra1  | 0.00347076 | 0.01 | 223.6% |
| V1ra2  | 0          | 0.00 |        |
| V1ra3  | 0          | 0.00 |        |
| V1ra4  | 0          | 0.00 |        |
| V1ra5  | 0          | 0.00 |        |
| V1ra6  | 0          | 0.00 |        |
| V1ra7  | 0          | 0.00 |        |
| V1ra8  | 0          | 0.00 |        |
| V1ra9  | 0          | 0.00 |        |
| V1rb1  | 0          | 0.00 |        |
| V1rb10 | 0          | 0.00 |        |
| V1rb2  | 0          | 0.00 |        |
| V1rb3  | 0          | 0.00 |        |
| V1rb4  | 0          | 0.00 |        |



|        |            |      |        |
|--------|------------|------|--------|
| V1rb7  | 0          | 0.00 |        |
| V1rb8  | 0          | 0.00 |        |
| V1rb9  | 0          | 0.00 |        |
| V1rc1  | 0          | 0.00 |        |
| V1rc10 | 0          | 0.00 |        |
| V1rc11 | 0          | 0.00 |        |
| V1rc12 | 0          | 0.00 |        |
| V1rc13 | 0          | 0.00 |        |
| V1rc14 | 0          | 0.00 |        |
| V1rc15 | 0.00920752 | 0.01 | 140.2% |
| V1rc16 | 0          | 0.00 |        |
| V1rc17 | 0          | 0.00 |        |
| V1rc18 | 0.01159456 | 0.03 | 223.6% |
| V1rc19 | 0          | 0.00 |        |
| V1rc2  | 0.0083736  | 0.02 | 223.6% |
| V1rc20 | 0          | 0.00 |        |
| V1rc21 | 0.03286282 | 0.02 | 64.0%  |
| V1rc22 | 0          | 0.00 |        |
| V1rc23 | 0          | 0.00 |        |
| V1rc24 | 0          | 0.00 |        |
| V1rc26 | 0          | 0.00 |        |
| V1rc27 | 0          | 0.00 |        |
| V1rc28 | 0          | 0.00 |        |
| V1rc29 | 0          | 0.00 |        |
| V1rc3  | 0          | 0.00 |        |
| V1rc30 | 0          | 0.00 |        |
| V1rc32 | 0          | 0.00 |        |
| V1rc33 | 0          | 0.00 |        |
| V1rc5  | 0          | 0.00 |        |
| V1rc6  | 0.04838838 | 0.03 | 68.5%  |
| V1rc7  | 0.00915542 | 0.02 | 223.6% |
| V1rc8  | 0          | 0.00 |        |
| V1rd1  | 0          | 0.00 |        |
| V1rd10 | 0          | 0.00 |        |
| V1rd11 | 0          | 0.00 |        |
| V1rd12 | 0          | 0.00 |        |
| V1rd13 | 0          | 0.00 |        |
| V1rd14 | 0          | 0.00 |        |
| V1rd15 | 0.06348308 | 0.04 | 63.5%  |
| V1rd16 | 0          | 0.00 |        |
| V1rd17 | 0          | 0.00 |        |
| V1rd19 | 0          | 0.00 |        |
| V1rd20 | 0          | 0.00 |        |
| V1rd21 | 0          | 0.00 |        |
| V1rd22 | 0          | 0.00 |        |
| V1rd3  | 0          | 0.00 |        |
| V1rd4  | 0          | 0.00 |        |

|        |            |      |        |
|--------|------------|------|--------|
| V1rd6  | 0          | 0.00 |        |
| V1rd7  | 0          | 0.00 |        |
| V1rd8  | 0          | 0.00 |        |
| V1rd9  | 0          | 0.00 |        |
| V1re1  | 0          | 0.00 |        |
| V1re10 | 0          | 0.00 |        |
| V1re11 | 0          | 0.00 |        |
| V1re12 | 0.00749186 | 0.02 | 223.6% |
| V1re13 | 0          | 0.00 |        |
| V1re2  | 0          | 0.00 |        |
| V1re3  | 0.00849974 | 0.02 | 223.6% |
| V1re4  | 0          | 0.00 |        |
| V1re5  | 0          | 0.00 |        |
| V1re6  | 0          | 0.00 |        |
| V1re7  | 0          | 0.00 |        |
| V1re8  | 0          | 0.00 |        |
| V1re9  | 0          | 0.00 |        |
| V1rf1  | 0          | 0.00 |        |
| V1rf2  | 0          | 0.00 |        |
| V1rf3  | 0          | 0.00 |        |
| V1rf4  | 0          | 0.00 |        |
| V1rf5  | 0.01062248 | 0.02 | 223.6% |
| V1rg1  | 0          | 0.00 |        |
| V1rg11 | 0          | 0.00 |        |
| V1rg12 | 0          | 0.00 |        |
| V1rg2  | 0          | 0.00 |        |
| V1rg3  | 0          | 0.00 |        |
| V1rg4  | 0          | 0.00 |        |
| V1rg5  | 0          | 0.00 |        |
| V1rg6  | 0          | 0.00 |        |
| V1rg7  | 0          | 0.00 |        |
| V1rg8  | 0          | 0.00 |        |
| V1rg9  | 0          | 0.00 |        |
| V1rh1  | 0          | 0.00 |        |
| V1rh10 | 0          | 0.00 |        |
| V1rh11 | 0          | 0.00 |        |
| V1rh12 | 0          | 0.00 |        |
| V1rh13 | 0          | 0.00 |        |
| V1rh14 | 0          | 0.00 |        |
| V1rh16 | 0          | 0.00 |        |
| V1rh17 | 0          | 0.00 |        |
| V1rh18 | 0          | 0.00 |        |
| V1rh2  | 0          | 0.00 |        |
| V1rh20 | 0          | 0.00 |        |
| V1rh21 | 0          | 0.00 |        |
| V1rh3  | 0          | 0.00 |        |
| V1rh4  | 0          | 0.00 |        |

|                                |            |       |        |
|--------------------------------|------------|-------|--------|
| V1rh5                          | 0          | 0.00  |        |
| V1rh6                          | 0          | 0.00  |        |
| V1rh7                          | 0.0106853  | 0.02  | 223.6% |
| V1rh8                          | 0          | 0.00  |        |
| V1rh9                          | 0          | 0.00  |        |
| V1ri1                          | 0          | 0.00  |        |
| V1ri10                         | 0          | 0.00  |        |
| V1ri2                          | 0          | 0.00  |        |
| V1ri3                          | 0          | 0.00  |        |
| V1ri4                          | 0          | 0.00  |        |
| V1ri5                          | 0          | 0.00  |        |
| V1ri6                          | 0          | 0.00  |        |
| V1ri7                          | 0          | 0.00  |        |
| V1ri8                          | 0          | 0.00  |        |
| V1ri9                          | 0          | 0.00  |        |
| V1rj2                          | 0          | 0.00  |        |
| V1rj3                          | 0.00775982 | 0.02  | 223.6% |
| V1rk1                          | 0          | 0.00  |        |
| V1rl1                          | 0          | 0.00  |        |
| V2r1                           | 0          | 0.00  |        |
| V2r10                          | 0.0031411  | 0.01  | 223.6% |
| V2r14                          | 0          | 0.00  |        |
| V2r15                          | 0          | 0.00  |        |
| V2r16                          | 0          | 0.00  |        |
| V2r1b                          | 0          | 0.00  |        |
| V2r3                           | 0          | 0.00  |        |
| V2r4                           | 0          | 0.00  |        |
| V2r6                           | 0          | 0.00  |        |
| V2r7                           | 0          | 0.00  |        |
| V2r9                           | 0          | 0.00  |        |
| Vac14                          | 14.36956   | 0.97  | 6.8%   |
| Vamp1                          | 275.8298   | 24.92 | 9.0%   |
| Vamp2                          | 465.013    | 13.02 | 2.8%   |
| Vamp3                          | 8.292938   | 0.39  | 4.7%   |
| Vamp4                          | 40.41122   | 2.40  | 5.9%   |
| Vamp5                          | 0.06133594 | 0.03  | 41.3%  |
| Vamp8                          | 1.73806    | 0.35  | 19.9%  |
| Vangl1                         | 2.918168   | 0.17  | 6.0%   |
| Vangl2                         | 5.375374   | 0.32  | 6.0%   |
| Vapa                           | 87.76182   | 5.95  | 6.8%   |
| Vapb                           | 40.53112   | 0.64  | 1.6%   |
| variable_group_of_2-cell-stage | 0          | 0.00  |        |
| Varp                           | 0.4370972  | 0.06  | 13.2%  |
| Vars                           | 10.60044   | 0.28  | 2.6%   |
| Vars2                          | 5.830022   | 0.33  | 5.6%   |
| Vash1                          | 14.38056   | 1.34  | 9.3%   |
| Vash2                          | 7.006526   | 0.60  | 8.5%   |

|               |             |       |        |
|---------------|-------------|-------|--------|
| Vasn          | 1.809942    | 0.17  | 9.2%   |
| Vasp          | 6.2996      | 0.37  | 5.9%   |
| Vat1          | 72.7591     | 9.33  | 12.8%  |
| Vav1          | 0.003945328 | 0.01  | 137.8% |
| Vav2          | 5.932858    | 0.17  | 2.9%   |
| Vav3          | 4.853952    | 0.37  | 7.5%   |
| Vax1          | 0.02993064  | 0.02  | 81.5%  |
| Vax2          | 7.244216    | 0.44  | 6.1%   |
| Vb7Db1Jb1.1Cb | 0           | 0.00  |        |
| Vbp1          | 48.21078    | 1.94  | 4.0%   |
| Vcam1         | 1.0792316   | 0.20  | 18.8%  |
| Vcan          | 2.574624    | 0.45  | 17.5%  |
| Vcl           | 11.91186    | 0.80  | 6.7%   |
| Vcp           | 28.09544    | 0.69  | 2.5%   |
| Vcpip1        | 15.24186    | 0.87  | 5.7%   |
| Vdac1         | 223.268     | 6.29  | 2.8%   |
| Vdac2         | 55.9        | 2.85  | 5.1%   |
| Vdac3         | 30.9861     | 1.72  | 5.6%   |
| Vdp           | 1.2694224   | 0.39  | 31.1%  |
| Vdr           | 0.023174894 | 0.02  | 95.3%  |
| Vdu1          | 0.5409594   | 0.11  | 20.9%  |
| Vdu2          | 4.177554    | 0.92  | 21.9%  |
| Vegf          | 0.6269844   | 0.32  | 50.9%  |
| Vegfa         | 18.35842    | 2.34  | 12.8%  |
| Vegfb         | 51.9783     | 1.56  | 3.0%   |
| Vegfc         | 0.9932498   | 0.11  | 11.4%  |
| Veph1         | 0.01856228  | 0.01  | 45.9%  |
| Veph-A        | 0           | 0.00  |        |
| vesl-2        | 0.1576676   | 0.03  | 20.4%  |
| VeZF1         | 9.88239     | 0.29  | 2.9%   |
| Vezt          | 16.35148    | 0.73  | 4.4%   |
| Vgcnl1        | 0.03795432  | 0.01  | 33.1%  |
| Vgf           | 88.58952    | 21.71 | 24.5%  |
| Vgl1          | 0           | 0.00  |        |
| Vgl2          | 0.353854    | 0.05  | 13.9%  |
| Vgl4          | 4.242794    | 0.40  | 9.4%   |
| Vhlh          | 13.62216    | 0.50  | 3.7%   |
| Vil1          | 0.012247834 | 0.01  | 54.6%  |
| Vil2          | 6.418488    | 0.78  | 12.1%  |
| Vill          | 0.0878375   | 0.06  | 65.5%  |
| Vim           | 55.98586    | 4.76  | 8.5%   |
| Vip           | 0.4445112   | 0.10  | 21.4%  |
| Vipr1         | 0.0470575   | 0.02  | 45.1%  |
| Vipr2         | 1.124036    | 0.04  | 3.5%   |
| Vit           | 0.3548348   | 0.09  | 26.1%  |
| Vkorc1        | 11.44052    | 0.65  | 5.7%   |
| Vkorc1l1      | 4.48641     | 0.55  | 12.2%  |

|          |            |      |        |
|----------|------------|------|--------|
| Vldlr    | 12.98976   | 0.63 | 4.8%   |
| Vmn2r118 | 0.0031764  | 0.01 | 223.6% |
| Vmn2r12  | 0          | 0.00 |        |
| Vmn2r13  | 0.0029676  | 0.01 | 223.6% |
| Vmn2r2   | 0          | 0.00 |        |
| Vmn2r27  | 0          | 0.00 |        |
| Vmn2r55  | 0          | 0.00 |        |
| Vmn2r76  | 0          | 0.00 |        |
| Vmn2r81  | 0          | 0.00 |        |
| Vmn2r92  | 0          | 0.00 |        |
| Vmn2r95  | 0          | 0.00 |        |
| Vmo1     | 0.0295468  | 0.07 | 223.6% |
| Vnn1     | 0.136497   | 0.06 | 41.0%  |
| Vnn3     | 0          | 0.00 |        |
| Vprbp    | 5.805004   | 0.28 | 4.8%   |
| Vpreb1   | 0          | 0.00 |        |
| Vpreb2   | 0          | 0.00 |        |
| Vpreb3   | 0.03797988 | 0.05 | 120.7% |
| Vps11    | 20.79378   | 0.78 | 3.7%   |
| Vps13a   | 4.918516   | 0.87 | 17.8%  |
| Vps13b   | 4.989438   | 0.17 | 3.4%   |
| Vps13c   | 10.645792  | 0.70 | 6.6%   |
| Vps13d   | 7.005156   | 0.32 | 4.6%   |
| Vps16    | 16.16396   | 0.49 | 3.0%   |
| Vps18    | 12.02246   | 0.42 | 3.5%   |
| Vps24    | 23.75836   | 0.53 | 2.2%   |
| Vps25    | 26.09584   | 2.64 | 10.1%  |
| Vps26a   | 17.30962   | 0.60 | 3.5%   |
| Vps26b   | 33.40982   | 1.96 | 5.9%   |
| Vps28    | 62.16236   | 4.24 | 6.8%   |
| Vps29    | 62.03986   | 2.43 | 3.9%   |
| Vps33a   | 21.03104   | 0.54 | 2.6%   |
| Vps33b   | 7.88477    | 0.38 | 4.8%   |
| Vps35    | 87.60372   | 3.30 | 3.8%   |
| Vps36    | 10.859282  | 1.22 | 11.2%  |
| Vps37a   | 14.58788   | 0.86 | 5.9%   |
| Vps37b   | 3.969658   | 0.24 | 5.9%   |
| Vps37c   | 13.5618    | 0.97 | 7.2%   |
| Vps37d   | 9.723382   | 0.42 | 4.3%   |
| Vps39    | 20.15938   | 1.89 | 9.4%   |
| Vps41    | 44.56144   | 0.93 | 2.1%   |
| Vps45    | 8.60767    | 0.48 | 5.5%   |
| Vps4a    | 37.16916   | 2.06 | 5.5%   |
| Vps4b    | 9.023154   | 0.72 | 7.9%   |
| Vps52    | 21.67236   | 0.77 | 3.6%   |
| Vps53    | 19.84804   | 1.66 | 8.4%   |
| Vps54    | 4.84296    | 0.27 | 5.5%   |

|          |             |       |        |
|----------|-------------|-------|--------|
| Vps72    | 8.41334     | 0.33  | 3.9%   |
| Vps8     | 8.329636    | 0.25  | 3.0%   |
| VR1      | 0           | 0.00  |        |
| VR10     | 0           | 0.00  |        |
| VR16     | 0           | 0.00  |        |
| VR3      | 0           | 0.00  |        |
| VRHO     | 0.4489148   | 0.20  | 45.1%  |
| Vrk1     | 2.927454    | 0.18  | 6.1%   |
| Vrk2     | 0.5534112   | 0.32  | 57.5%  |
| Vrk3     | 5.689336    | 0.57  | 10.0%  |
| Vsig1    | 0.2142534   | 0.06  | 28.8%  |
| Vsig2    | 0.3770334   | 0.11  | 28.5%  |
| Vsig4    | 0           | 0.00  |        |
| Vsig8    | 0.06960038  | 0.03  | 45.3%  |
| Vsn11    | 214.5166    | 17.98 | 8.4%   |
| Vstm2a   | 68.75896    | 1.97  | 2.9%   |
| Vstm2b   | 21.66644    | 2.02  | 9.3%   |
| Vstm2l   | 37.92038    | 4.64  | 12.2%  |
| Vsx1     | 0           | 0.00  |        |
| Vsx2     | 0.031714116 | 0.03  | 91.8%  |
| Vta1     | 23.08906    | 2.03  | 8.8%   |
| Vtcn1    | 0.02047442  | 0.02  | 104.0% |
| Vti1a    | 17.40298    | 0.87  | 5.0%   |
| Vti1b    | 47.99228    | 1.92  | 4.0%   |
| Vti1-rp2 | 3.549006    | 0.58  | 16.4%  |
| Vtn      | 0.12970512  | 0.07  | 50.7%  |
| Vwa1     | 1.1375488   | 0.22  | 19.6%  |
| Vwa2     | 0.01921324  | 0.01  | 60.5%  |
| Vwa3a    | 0.1151193   | 0.02  | 21.4%  |
| Vwc2     | 9.80989     | 0.59  | 6.1%   |
| Vwce     | 0.03813786  | 0.02  | 40.8%  |
| Vwf      | 0.12501202  | 0.10  | 78.9%  |
| Wac      | 22.9302     | 0.84  | 3.7%   |
| Wap      | 0           | 0.00  |        |
| Wapal    | 5.640092    | 0.36  | 6.3%   |
| Wars     | 49.96418    | 3.14  | 6.3%   |
| Wars2    | 2.423632    | 0.16  | 6.7%   |
| Was      | 0           | 0.00  |        |
| Wasf1    | 35.78292    | 3.30  | 9.2%   |
| Wasf2    | 2.537352    | 0.29  | 11.3%  |
| Wasf3    | 23.86528    | 0.77  | 3.2%   |
| Wasl     | 21.89136    | 1.77  | 8.1%   |
| Wbp1     | 12.01962    | 0.86  | 7.1%   |
| Wbp11    | 27.52926    | 1.96  | 7.1%   |
| Wbp2     | 120.068     | 4.96  | 4.1%   |
| Wbp2nl   | 0.11031234  | 0.04  | 32.3%  |
| Wbp4     | 11.16472    | 0.70  | 6.2%   |

|         |            |      |        |
|---------|------------|------|--------|
| Wbp5    | 39.01698   | 2.03 | 5.2%   |
| Wbp7    | 8.914688   | 0.72 | 8.1%   |
| Wbscr16 | 3.452616   | 0.41 | 11.9%  |
| Wbscr17 | 18.41526   | 0.47 | 2.5%   |
| Wbscr18 | 14.15018   | 1.42 | 10.0%  |
| Wbscr21 | 10.837938  | 0.88 | 8.2%   |
| Wbscr22 | 7.321478   | 1.02 | 14.0%  |
| Wbscr25 | 0.036166   | 0.02 | 54.1%  |
| Wbscr27 | 2.243862   | 0.29 | 12.7%  |
| Wbscr28 | 0          | 0.00 |        |
| wdc146  | 8.36038    | 1.89 | 22.6%  |
| Wdfy1   | 12.45238   | 0.53 | 4.2%   |
| Wdfy2   | 3.535858   | 0.49 | 13.8%  |
| Wdfy3   | 9.084732   | 0.96 | 10.6%  |
| Wdfy4   | 0.01351554 | 0.01 | 94.8%  |
| Wdhd1   | 1.387812   | 0.19 | 13.9%  |
| wdp103  | 0.27103934 | 0.14 | 49.9%  |
| Wdr1    | 65.84888   | 5.42 | 8.2%   |
| Wdr12   | 4.828512   | 0.29 | 6.1%   |
| Wdr13   | 38.26946   | 1.49 | 3.9%   |
| Wdr16   | 0.11434518 | 0.02 | 14.7%  |
| Wdr17   | 4.196974   | 0.37 | 8.8%   |
| Wdr18   | 17.04152   | 0.28 | 1.7%   |
| Wdr19   | 4.108866   | 0.34 | 8.4%   |
| Wdr20a  | 6.042428   | 0.46 | 7.7%   |
| Wdr20b  | 0.3613288  | 0.06 | 17.6%  |
| Wdr21   | 6.411532   | 0.39 | 6.0%   |
| Wdr22   | 17.93634   | 0.41 | 2.3%   |
| Wdr23   | 16.31692   | 0.55 | 3.4%   |
| Wdr24   | 7.19001    | 0.20 | 2.8%   |
| Wdr26   | 29.58908   | 1.34 | 4.5%   |
| Wdr27   | 0.3135844  | 0.10 | 30.6%  |
| Wdr3    | 5.266072   | 0.24 | 4.5%   |
| Wdr31   | 1.706476   | 0.33 | 19.1%  |
| Wdr32   | 6.593334   | 0.26 | 4.0%   |
| Wdr33   | 14.7755    | 1.34 | 9.0%   |
| Wdr34   | 12.18472   | 1.05 | 8.6%   |
| Wdr35   | 8.650286   | 0.50 | 5.8%   |
| Wdr36   | 11.7194    | 1.04 | 8.9%   |
| Wdr37   | 43.86426   | 0.94 | 2.2%   |
| Wdr38   | 0.3272359  | 0.53 | 161.7% |
| Wdr4    | 4.407952   | 0.77 | 17.5%  |
| wdr4    | 1.6374962  | 0.66 | 40.4%  |
| Wdr40a  | 18.03936   | 0.71 | 3.9%   |
| Wdr40b  | 12.73162   | 0.40 | 3.2%   |
| Wdr40c  | 0.2329258  | 0.04 | 17.4%  |
| Wdr41   | 10.285662  | 0.65 | 6.3%   |

|        |            |      |        |
|--------|------------|------|--------|
| Wdr42a | 23.38902   | 0.75 | 3.2%   |
| Wdr43  | 6.881716   | 0.22 | 3.1%   |
| Wdr44  | 5.673342   | 0.38 | 6.7%   |
| Wdr45  | 10.712508  | 0.55 | 5.1%   |
| Wdr45l | 18.34826   | 0.50 | 2.7%   |
| Wdr46  | 2.575834   | 0.31 | 12.1%  |
| Wdr47  | 32.95158   | 1.00 | 3.0%   |
| Wdr48  | 17.65404   | 1.03 | 5.8%   |
| Wdr5   | 12.6585    | 0.94 | 7.4%   |
| Wdr51a | 0.7934724  | 0.23 | 29.2%  |
| Wdr51b | 1.473732   | 0.05 | 3.6%   |
| Wdr53  | 4.06301    | 0.19 | 4.6%   |
| Wdr54  | 2.354692   | 0.38 | 16.3%  |
| Wdr55  | 2.1068008  | 1.20 | 56.9%  |
| Wdr57  | 7.557758   | 0.90 | 12.0%  |
| Wdr59  | 6.690964   | 0.30 | 4.5%   |
| Wdr5b  | 1.592976   | 0.22 | 13.9%  |
| Wdr6   | 128.273    | 2.77 | 2.2%   |
| Wdr60  | 1.838928   | 0.21 | 11.2%  |
| Wdr61  | 10.80032   | 0.55 | 5.1%   |
| Wdr62  | 0.841287   | 0.14 | 16.3%  |
| Wdr63  | 0.03125008 | 0.03 | 80.8%  |
| Wdr66  | 0.06805618 | 0.03 | 47.3%  |
| Wdr67  | 2.106536   | 0.30 | 14.1%  |
| Wdr68  | 124.0076   | 3.14 | 2.5%   |
| Wdr69  | 0.00651998 | 0.01 | 144.4% |
| Wdr7   | 33.5239    | 1.77 | 5.3%   |
| Wdr70  | 14.13202   | 0.50 | 3.6%   |
| Wdr72  | 0.15901562 | 0.05 | 29.8%  |
| Wdr73  | 5.335086   | 0.33 | 6.2%   |
| Wdr74  | 14.68192   | 1.38 | 9.4%   |
| Wdr75  | 12.13968   | 0.41 | 3.4%   |
| Wdr76  | 0.8784196  | 0.07 | 7.7%   |
| Wdr77  | 23.39018   | 0.73 | 3.1%   |
| Wdr78  | 0.7531162  | 0.11 | 14.3%  |
| Wdr79  | 1.71649    | 0.08 | 4.7%   |
| Wdr8   | 5.515414   | 0.32 | 5.8%   |
| Wdr81  | 4.564354   | 0.35 | 7.7%   |
| Wdr82  | 44.2364    | 1.20 | 2.7%   |
| Wdr85  | 5.305196   | 0.34 | 6.5%   |
| Wdr86  | 0.00254906 | 0.01 | 223.6% |
| Wdr9   | 1.95901    | 0.55 | 27.9%  |
| Wdr91  | 6.967782   | 0.49 | 7.0%   |
| Wdr92  | 3.07267    | 0.17 | 5.5%   |
| Wdsof1 | 14.51114   | 0.97 | 6.7%   |
| Wdsub1 | 4.331394   | 0.53 | 12.2%  |
| Wdte1  | 14.43594   | 0.52 | 3.6%   |



|         |            |      |        |
|---------|------------|------|--------|
| Wdvcf   | 1.701536   | 0.28 | 16.2%  |
| Wee1    | 5.954604   | 1.09 | 18.3%  |
| Wee2    | 0.1282689  | 0.04 | 32.3%  |
| Wfdc1   | 0.09990888 | 0.06 | 62.9%  |
| Wfdc10  | 0          | 0.00 |        |
| Wfdc12  | 0          | 0.00 |        |
| Wfdc13  | 0.00787968 | 0.02 | 223.6% |
| Wfdc15a | 0          | 0.00 |        |
| Wfdc15b | 0          | 0.00 |        |
| Wfdc16  | 0          | 0.00 |        |
| Wfdc2   | 0.01203306 | 0.02 | 137.8% |
| Wfdc3   | 0.2034232  | 0.05 | 25.5%  |
| Wfdc5   | 0.00410014 | 0.01 | 223.6% |
| Wfdc6a  | 0          | 0.00 |        |
| Wfdc6b  | 0          | 0.00 |        |
| Wfdc8   | 0          | 0.00 |        |
| Wfikkn2 | 0.10379868 | 0.05 | 45.6%  |
| Wfs1    | 12.74068   | 0.83 | 6.5%   |
| Whdc1   | 5.044216   | 0.37 | 7.4%   |
| Whrn    | 2.648764   | 0.37 | 14.1%  |
| Whsc1   | 14.23678   | 1.46 | 10.3%  |
| Whsc111 | 18.74374   | 0.64 | 3.4%   |
| Whsc2   | 6.356612   | 0.37 | 5.9%   |
| Wibg    | 8.164376   | 1.11 | 13.6%  |
| Wif1    | 0.2806918  | 0.09 | 33.1%  |
| Wipf1   | 1.2297342  | 0.25 | 20.3%  |
| Wipf2   | 10.297546  | 0.64 | 6.2%   |
| Wipi1   | 4.044272   | 0.55 | 13.5%  |
| Wipi2   | 24.84602   | 0.80 | 3.2%   |
| Wisp1   | 1.575128   | 0.24 | 14.9%  |
| Wisp2   | 0.01218574 | 0.01 | 92.3%  |
| Wiz     | 13.50134   | 1.13 | 8.4%   |
| wiz     | 2.388518   | 0.49 | 20.6%  |
| Wnk1    | 17.4528    | 0.82 | 4.7%   |
| Wnk2    | 18.23706   | 0.94 | 5.2%   |
| Wnk3    | 6.789224   | 0.31 | 4.6%   |
| Wnk4    | 1.34341    | 0.15 | 11.5%  |
| Wnt1    | 0.1390022  | 0.02 | 15.6%  |
| Wnt10a  | 0.04020144 | 0.03 | 83.2%  |
| Wnt10b  | 0.3756858  | 0.06 | 14.8%  |
| Wnt11   | 1.163226   | 0.09 | 8.0%   |
| Wnt16   | 0.03119072 | 0.01 | 32.2%  |
| Wnt2    | 0.1494487  | 0.03 | 22.6%  |
| Wnt2b   | 0.8263238  | 0.16 | 19.0%  |
| Wnt3    | 1.0438896  | 0.08 | 7.6%   |
| Wnt3a   | 0.03409204 | 0.02 | 69.1%  |
| Wnt4    | 0.371919   | 0.15 | 39.5%  |

|        |            |        |        |
|--------|------------|--------|--------|
| Wnt5a  | 5.928294   | 0.32   | 5.3%   |
| Wnt5b  | 1.0947698  | 0.16   | 15.1%  |
| Wnt6   | 0.09076616 | 0.05   | 55.4%  |
| Wnt7a  | 1.17628    | 0.13   | 10.8%  |
| Wnt7b  | 2.2021     | 0.09   | 4.1%   |
| Wnt8a  | 0          | 0.00   |        |
| Wnt8b  | 0.01548772 | 0.02   | 102.3% |
| Wnt9a  | 0.8502486  | 0.18   | 21.7%  |
| Wnt9b  | 0.06122182 | 0.01   | 24.1%  |
| Wrb    | 34.2284    | 2.96   | 8.6%   |
| Wrn    | 1.96345    | 0.22   | 11.3%  |
| Wrnip1 | 15.61448   | 0.37   | 2.4%   |
| Wsb1   | 46.9056    | 3.84   | 8.2%   |
| Wsb2   | 77.51266   | 7.27   | 9.4%   |
| Wscd1  | 21.89526   | 1.33   | 6.1%   |
| Wscd2  | 5.13147    | 0.26   | 5.1%   |
| Wt1    | 0.1254842  | 0.02   | 12.1%  |
| Wtap   | 7.765352   | 0.18   | 2.3%   |
| wtap   | 6.78844    | 1.81   | 26.7%  |
| Wtip   | 2.133196   | 0.29   | 13.7%  |
| Wwc1   | 6.473942   | 0.35   | 5.4%   |
| Wwc2   | 4.75956    | 0.39   | 8.3%   |
| Wwox   | 7.961336   | 0.56   | 7.1%   |
| Wwp1   | 8.116358   | 0.43   | 5.3%   |
| Wwp2   | 9.498076   | 0.45   | 4.7%   |
| Wwtr1  | 3.258186   | 0.42   | 12.9%  |
| X02930 | 0          | 0.00   |        |
| X02938 | 0          | 0.00   |        |
| X02969 | 0          | 0.00   |        |
| X05012 | 0          | 0.00   |        |
| X05732 | 0          | 0.00   |        |
| X05737 | 0          | 0.00   |        |
| X06772 | 0          | 0.00   |        |
| X56719 | 0          | 0.00   |        |
| X56722 | 0          | 0.00   |        |
| X57330 | 0          | 0.00   |        |
| X57780 | 3967.778   | 516.64 | 13.0%  |
| X63927 | 0          | 0.00   |        |
| X65506 | 0          | 0.00   |        |
| X83328 | 16.7091    | 3.37   | 20.2%  |
| X95399 | 13.43002   | 1.21   | 9.0%   |
| X98059 | 0          | 0.00   |        |
| X99384 | 3.782804   | 0.25   | 6.6%   |
| Xab1   | 11.50394   | 0.67   | 5.8%   |
| Xab2   | 9.84302    | 0.26   | 2.6%   |
| Xbp1   | 24.53302   | 1.86   | 7.6%   |
| Xcl1   | 0          | 0.00   |        |

|          |             |      |        |
|----------|-------------|------|--------|
| Xcr1     | 0.03722016  | 0.02 | 42.9%  |
| Xdh      | 0.10521326  | 0.04 | 39.5%  |
| Xirp1    | 0.005160378 | 0.00 | 87.7%  |
| Xirp2    | 0.002982258 | 0.00 | 105.2% |
| Xk       | 4.684694    | 0.19 | 4.1%   |
| Xkr4     | 7.245094    | 1.08 | 14.8%  |
| Xkr5     | 0.1640028   | 0.08 | 50.2%  |
| Xkr6     | 1.219808    | 0.09 | 7.6%   |
| Xkr7     | 2.27157     | 0.26 | 11.4%  |
| Xkr8     | 2.342978    | 0.09 | 3.8%   |
| Xkr9     | 0.01044018  | 0.01 | 137.4% |
| Xkrx     | 0.2828498   | 0.09 | 31.8%  |
| Xlp      | 0.00488672  | 0.01 | 223.6% |
| Xlr      | 0           | 0.00 |        |
| Xlr3a    | 0.07527492  | 0.05 | 61.3%  |
| Xlr3b    | 0.03084886  | 0.03 | 113.4% |
| Xlr3c    | 0.00557974  | 0.01 | 223.6% |
| Xlr4a    | 0.00488822  | 0.01 | 223.6% |
| Xlr4b    | 0           | 0.00 |        |
| Xlr4c    | 0           | 0.00 |        |
| Xlr5a    | 0           | 0.00 |        |
| Xlr5c    | 0           | 0.00 |        |
| Xmr      | 0           | 0.00 |        |
| Xpa      | 4.645994    | 0.46 | 9.8%   |
| Xpc      | 3.174502    | 0.14 | 4.4%   |
| Xpnpep1  | 26.406      | 2.59 | 9.8%   |
| Xpnpep2  | 0.03114576  | 0.02 | 62.6%  |
| Xpnpep3  | 3.881756    | 0.43 | 11.0%  |
| Xpo1     | 26.60946    | 0.99 | 3.7%   |
| Xpo4     | 1.0997074   | 0.32 | 29.5%  |
| Xpo5     | 12.17652    | 0.30 | 2.4%   |
| Xpo6     | 24.68586    | 0.80 | 3.3%   |
| Xpo7     | 24.46016    | 1.40 | 5.7%   |
| Xpot     | 9.616604    | 0.28 | 2.9%   |
| Xpr1     | 25.67796    | 1.71 | 6.7%   |
| Xrcc1    | 5.11192     | 0.30 | 5.9%   |
| Xrcc2    | 1.629848    | 0.16 | 9.6%   |
| Xrcc3    | 2.127918    | 0.13 | 6.2%   |
| Xrcc4    | 4.25746     | 0.63 | 14.9%  |
| Xrcc5    | 6.854326    | 0.47 | 6.8%   |
| Xrcc6    | 5.218734    | 0.29 | 5.6%   |
| Xrcc6bp1 | 4.049536    | 0.32 | 7.9%   |
| Xrn1     | 2.68381     | 0.27 | 10.0%  |
| Xrn2     | 12.27978    | 0.63 | 5.1%   |
| Xrra1    | 0.1311611   | 0.03 | 24.6%  |
| Xtrp3s1  | 0.00294016  | 0.01 | 223.6% |
| Xylb     | 2.142332    | 0.18 | 8.3%   |

|        |            |       |        |
|--------|------------|-------|--------|
| Xylt1  | 2.118676   | 0.02  | 1.0%   |
| Xylt2  | 7.42209    | 0.43  | 5.8%   |
| Y08382 | 0.070238   | 0.16  | 223.6% |
| YAF2   | 24.9425    | 1.18  | 4.7%   |
| Yaf2   | 20.12414   | 0.94  | 4.7%   |
| Yap1   | 3.58742    | 0.57  | 16.0%  |
| Yars   | 34.40504   | 4.19  | 12.2%  |
| Yars2  | 7.642404   | 0.50  | 6.5%   |
| Ybx1   | 44.19376   | 7.70  | 17.4%  |
| Ybx2   | 1.072644   | 0.16  | 14.8%  |
| Yeats2 | 4.368448   | 0.10  | 2.4%   |
| Yeats4 | 13.3683    | 1.10  | 8.2%   |
| Yes1   | 3.361828   | 0.25  | 7.3%   |
| Yif1a  | 12.1285    | 0.88  | 7.2%   |
| Yif1b  | 23.84366   | 2.01  | 8.4%   |
| Yipf1  | 14.76808   | 1.51  | 10.2%  |
| Yipf2  | 11.187438  | 3.11  | 27.8%  |
| Yipf3  | 21.2581    | 0.92  | 4.3%   |
| Yipf4  | 23.89308   | 1.46  | 6.1%   |
| Yipf5  | 16.59644   | 1.18  | 7.1%   |
| Yipf6  | 16.0498    | 0.84  | 5.2%   |
| Yipf7  | 0.04952104 | 0.06  | 127.7% |
| Ykt6   | 32.35676   | 1.39  | 4.3%   |
| Ylpm1  | 12.56656   | 0.71  | 5.6%   |
| Yme1l1 | 30.82084   | 1.14  | 3.7%   |
| Yod1   | 2.220064   | 0.21  | 9.5%   |
| Ypel1  | 3.679838   | 0.60  | 16.3%  |
| Ypel2  | 4.218852   | 0.89  | 21.1%  |
| Ypel3  | 60.25436   | 6.96  | 11.6%  |
| Ypel4  | 7.598432   | 2.16  | 28.4%  |
| Ypel5  | 35.65222   | 3.47  | 9.7%   |
| Yrdc   | 7.225262   | 0.79  | 11.0%  |
| Ythdc1 | 19.50628   | 1.32  | 6.8%   |
| Ythdf1 | 23.49106   | 1.22  | 5.2%   |
| Ythdf2 | 13.6857    | 0.91  | 6.6%   |
| Ythdf3 | 18.63784   | 0.44  | 2.4%   |
| Ywhab  | 269.2066   | 10.33 | 3.8%   |
| Ywhae  | 384.6576   | 22.27 | 5.8%   |
| Ywhag  | 489.3      | 21.13 | 4.3%   |
| Ywhah  | 219.048    | 11.44 | 5.2%   |
| Ywhaq  | 33.09686   | 2.52  | 7.6%   |
| Ywhaz  | 154.725    | 12.05 | 7.8%   |
| Yy1    | 9.389506   | 0.30  | 3.2%   |
| Z12226 | 0          | 0.00  |        |
| Z22835 | 0          | 0.00  |        |
| Z22845 | 0          | 0.00  |        |
| Z83810 | 0.05538694 | 0.06  | 102.5% |

|         |             |      |        |
|---------|-------------|------|--------|
| Z83812  | 0.01554172  | 0.03 | 223.6% |
| Z83815  | 0           | 0.00 |        |
| Zac1    | 2.1481872   | 1.01 | 46.9%  |
| Zadh1   | 8.982994    | 0.93 | 10.4%  |
| Zadh2   | 10.60903    | 0.52 | 4.9%   |
| Zan     | 0.012777628 | 0.00 | 33.7%  |
| zap     | 4.376178    | 0.46 | 10.6%  |
| Zap70   | 0.0942612   | 0.05 | 50.9%  |
| Zar1    | 0.03349704  | 0.03 | 80.4%  |
| Zbed3   | 4.341016    | 0.33 | 7.6%   |
| Zbed4   | 0.5247532   | 0.03 | 5.0%   |
| Zbp1    | 0.0033348   | 0.01 | 223.6% |
| Zbtb1   | 3.676104    | 0.46 | 12.6%  |
| Zbtb11  | 0.05492426  | 0.02 | 40.1%  |
| Zbtb12  | 3.206564    | 0.54 | 16.9%  |
| Zbtb16  | 2.011002    | 0.17 | 8.6%   |
| Zbtb17  | 4.128458    | 0.29 | 7.1%   |
| Zbtb2   | 1.97398     | 0.17 | 8.8%   |
| Zbtb20  | 0.2093392   | 0.03 | 14.5%  |
| Zbtb22  | 7.586534    | 0.48 | 6.3%   |
| Zbtb24  | 3.633654    | 0.24 | 6.5%   |
| Zbtb25  | 5.124052    | 0.38 | 7.4%   |
| Zbtb26  | 2.974934    | 0.27 | 9.1%   |
| Zbtb3   | 1.812062    | 0.13 | 6.9%   |
| Zbtb32  | 0.2538004   | 0.08 | 30.8%  |
| Zbtb33  | 7.938808    | 0.22 | 2.8%   |
| Zbtb34  | 2.194154    | 0.14 | 6.2%   |
| Zbtb37  | 0.9632714   | 0.17 | 17.7%  |
| Zbtb38  | 2.640534    | 0.37 | 13.9%  |
| Zbtb39  | 2.323526    | 0.10 | 4.3%   |
| Zbtb4   | 9.732502    | 0.28 | 2.9%   |
| Zbtb40  | 1.344448    | 0.09 | 6.8%   |
| Zbtb41  | 6.053964    | 0.54 | 8.9%   |
| Zbtb43  | 3.624724    | 0.20 | 5.5%   |
| Zbtb44  | 2.689462    | 0.50 | 18.7%  |
| Zbtb45  | 10.242232   | 0.47 | 4.6%   |
| Zbtb46  | 3.335732    | 0.35 | 10.5%  |
| Zbtb48  | 2.521226    | 0.15 | 5.8%   |
| Zbtb5   | 3.906196    | 0.19 | 4.9%   |
| Zbtb6   | 4.434204    | 0.36 | 8.2%   |
| Zbtb7a  | 9.409608    | 1.43 | 15.2%  |
| Zbtb7b  | 1.828084    | 0.17 | 9.5%   |
| Zbtb7c  | 3.40833     | 0.34 | 10.0%  |
| Zbtb8   | 2.363048    | 0.06 | 2.7%   |
| Zbtb8os | 1.495674    | 0.29 | 19.6%  |
| Zbtb9   | 4.300362    | 0.51 | 11.9%  |
| Zc3h10  | 4.449974    | 0.36 | 8.1%   |

|          |            |      |        |
|----------|------------|------|--------|
| Zc3h11a  | 17.31246   | 1.49 | 8.6%   |
| Zc3h12a  | 0.08744096 | 0.05 | 54.1%  |
| Zc3h12b  | 1.473026   | 0.10 | 6.6%   |
| Zc3h12c  | 2.576216   | 0.29 | 11.4%  |
| Zc3h12d  | 0.01403942 | 0.01 | 68.5%  |
| Zc3h13   | 11.21062   | 0.21 | 1.9%   |
| Zc3h14   | 19.43924   | 0.67 | 3.5%   |
| Zc3h15   | 39.15388   | 1.45 | 3.7%   |
| Zc3h3    | 0.9892168  | 0.11 | 10.9%  |
| Zc3h6    | 3.093864   | 0.05 | 1.8%   |
| Zc3h7a   | 7.119956   | 0.81 | 11.4%  |
| Zc3h7b   | 35.92676   | 0.93 | 2.6%   |
| Zc3h8    | 2.440712   | 0.35 | 14.3%  |
| Zc3hav1  | 1.171132   | 0.21 | 18.2%  |
| Zc3hav1l | 1.88493    | 0.22 | 11.6%  |
| Zc3hc1   | 11.94242   | 0.62 | 5.2%   |
| Zcchc10  | 3.947852   | 0.85 | 21.4%  |
| Zcchc11  | 6.192146   | 0.33 | 5.3%   |
| Zcchc12  | 76.163     | 5.89 | 7.7%   |
| Zcchc14  | 6.650544   | 0.32 | 4.8%   |
| Zcchc16  | 1.229334   | 0.09 | 7.1%   |
| Zcchc17  | 24.0494    | 2.42 | 10.0%  |
| Zcchc18  | 131.3996   | 1.86 | 1.4%   |
| Zcchc2   | 3.508604   | 0.22 | 6.2%   |
| Zcchc3   | 2.209744   | 0.20 | 9.0%   |
| Zcchc4   | 2.396236   | 0.25 | 10.4%  |
| Zcchc5   | 0.6705586  | 0.27 | 40.6%  |
| Zcchc6   | 8.119656   | 0.58 | 7.1%   |
| Zcchc7   | 0.6165102  | 0.17 | 27.8%  |
| Zcchc8   | 6.072058   | 0.18 | 3.0%   |
| Zcchc9   | 3.535204   | 0.27 | 7.5%   |
| Zcrb1    | 13.99624   | 1.29 | 9.2%   |
| Zcwpw1   | 1.831506   | 0.22 | 11.9%  |
| Zcwpw2   | 0.9321156  | 0.17 | 17.8%  |
| Zcyto7   | 0.00463512 | 0.01 | 223.6% |
| Zdhhc1   | 9.703036   | 0.32 | 3.3%   |
| Zdhhc11  | 0.01042394 | 0.01 | 140.6% |
| Zdhhc12  | 1.322487   | 1.31 | 99.3%  |
| Zdhhc13  | 9.537888   | 0.60 | 6.3%   |
| Zdhhc14  | 3.811276   | 0.61 | 16.1%  |
| Zdhhc15  | 3.881776   | 0.31 | 7.9%   |
| Zdhhc16  | 22.87612   | 2.39 | 10.5%  |
| Zdhhc17  | 23.64976   | 1.33 | 5.6%   |
| Zdhhc18  | 11.96112   | 0.94 | 7.8%   |
| Zdhhc19  | 0          | 0.00 |        |
| Zdhhc2   | 26.26966   | 1.29 | 4.9%   |
| Zdhhc20  | 18.14278   | 1.76 | 9.7%   |

|         |            |      |       |
|---------|------------|------|-------|
| Zdhhc21 | 12.39286   | 1.03 | 8.3%  |
| Zdhhc22 | 10.82604   | 0.57 | 5.3%  |
| Zdhhc23 | 0.610252   | 0.07 | 11.4% |
| Zdhhc24 | 13.09766   | 0.52 | 4.0%  |
| Zdhhc25 | 0          | 0.00 |       |
| Zdhhc3  | 12.98562   | 1.22 | 9.4%  |
| Zdhhc4  | 8.889478   | 1.31 | 14.7% |
| Zdhhc5  | 20.45182   | 1.00 | 4.9%  |
| Zdhhc6  | 8.492094   | 0.38 | 4.5%  |
| Zdhhc7  | 8.68202    | 0.42 | 4.9%  |
| Zdhhc8  | 13.45626   | 0.67 | 5.0%  |
| Zdhhc9  | 15.3584    | 1.33 | 8.7%  |
| Zeb1    | 10.92276   | 0.62 | 5.7%  |
| Zeb2    | 3.773464   | 0.14 | 3.8%  |
| Zer1    | 33.00592   | 1.66 | 5.0%  |
| Zfa     | 0.22187    | 0.08 | 35.6% |
| Zfand1  | 2.161114   | 0.37 | 17.3% |
| Zfand2a | 22.0673    | 0.80 | 3.6%  |
| Zfand2b | 6.390432   | 0.10 | 1.6%  |
| Zfand3  | 16.8241    | 1.59 | 9.4%  |
| Zfand5  | 54.73212   | 2.01 | 3.7%  |
| Zfand6  | 19.72512   | 1.30 | 6.6%  |
| Zfat1   | 0.9312454  | 0.14 | 14.8% |
| Zfhx1a  | 0.02919434 | 0.01 | 20.1% |
| Zfhx1b  | 0.11506722 | 0.04 | 38.7% |
| Zfhx2   | 3.361834   | 0.33 | 9.8%  |
| Zfhx3   | 2.875932   | 0.20 | 6.9%  |
| Zfhx4   | 4.462144   | 0.36 | 8.0%  |
| Zfml    | 16.1315    | 0.99 | 6.1%  |
| Zfp1    | 4.897768   | 0.32 | 6.6%  |
| Zfp101  | 2.63385    | 0.19 | 7.4%  |
| Zfp105  | 2.408138   | 0.15 | 6.3%  |
| Zfp106  | 12.70088   | 1.13 | 8.9%  |
| Zfp108  | 1.213588   | 0.04 | 3.4%  |
| Zfp109  | 0.7428972  | 0.09 | 11.7% |
| Zfp11   | 1.541242   | 0.10 | 6.2%  |
| Zfp110  | 2.482122   | 0.22 | 9.0%  |
| Zfp111  | 0.9171668  | 0.09 | 9.9%  |
| Zfp112  | 1.881958   | 0.28 | 15.0% |
| Zfp113  | 1.297558   | 0.08 | 6.1%  |
| Zfp114  | 0.209793   | 0.04 | 19.0% |
| Zfp119  | 1.66879    | 0.22 | 13.2% |
| Zfp12   | 5.247338   | 0.16 | 3.1%  |
| Zfp120  | 3.055802   | 0.31 | 10.0% |
| Zfp128  | 1.67291    | 0.15 | 9.1%  |
| Zfp13   | 5.74709    | 0.12 | 2.2%  |
| Zfp131  | 0          | 0.00 |       |

|         |           |      |        |
|---------|-----------|------|--------|
| Zfp14   | 4.121946  | 0.32 | 7.9%   |
| Zfp142  | 4.145642  | 1.22 | 29.4%  |
| Zfp143  | 2.255694  | 0.20 | 8.7%   |
| Zfp146  | 12.7407   | 0.44 | 3.5%   |
| Zfp148  | 8.28886   | 0.23 | 2.8%   |
| Zfp157  | 6.259132  | 0.26 | 4.1%   |
| Zfp160  | 5.542002  | 0.30 | 5.4%   |
| Zfp161  | 6.504388  | 0.29 | 4.4%   |
| Zfp167  | 0.642737  | 0.06 | 9.9%   |
| Zfp169  | 2.640102  | 0.28 | 10.6%  |
| Zfp174  | 1.20213   | 0.08 | 6.5%   |
| Zfp179  | 7.065794  | 0.62 | 8.8%   |
| Zfp180  | 6.718832  | 0.28 | 4.2%   |
| Zfp182  | 1.60466   | 0.14 | 8.9%   |
| Zfp184  | 0.8120702 | 0.09 | 10.6%  |
| Zfp185  | 0.1472194 | 0.03 | 21.1%  |
| Zfp187  | 12.81236  | 1.91 | 14.9%  |
| Zfp189  | 1.842088  | 0.13 | 7.3%   |
| Zfp191  | 7.978028  | 0.28 | 3.4%   |
| Zfp192  | 3.1149    | 0.17 | 5.4%   |
| Zfp2    | 7.478412  | 0.28 | 3.7%   |
| Zfp202  | 1.340264  | 0.07 | 5.3%   |
| Zfp206  | 0.0041564 | 0.01 | 138.9% |
| Zfp207  | 36.20264  | 1.10 | 3.0%   |
| Zfp212  | 3.26238   | 0.17 | 5.1%   |
| Zfp213  | 2.206374  | 0.12 | 5.4%   |
| Zfp217  | 0.6872392 | 0.12 | 17.2%  |
| Zfp219  | 6.862382  | 0.91 | 13.3%  |
| Zfp235  | 3.46568   | 0.30 | 8.8%   |
| Zfp236  | 0.2070906 | 0.09 | 45.0%  |
| Zfp238  | 9.778284  | 0.52 | 5.3%   |
| Zfp239  | 7.19276   | 0.26 | 3.7%   |
| Zfp248  | 5.602058  | 0.34 | 6.1%   |
| Zfp251  | 11.1607   | 0.40 | 3.6%   |
| Zfp259  | 7.255084  | 0.43 | 5.9%   |
| Zfp26   | 4.639444  | 0.59 | 12.7%  |
| Zfp260  | 12.07192  | 0.52 | 4.3%   |
| Zfp263  | 5.374934  | 0.18 | 3.3%   |
| Zfp27   | 4.307582  | 0.22 | 5.2%   |
| Zfp273  | 2.063236  | 0.26 | 12.7%  |
| Zfp275  | 6.722576  | 0.28 | 4.1%   |
| Zfp276  | 1.659594  | 0.48 | 29.1%  |
| Zfp277  | 4.226026  | 0.51 | 12.0%  |
| Zfp28   | 1.769318  | 0.20 | 11.2%  |
| Zfp280b | 5.780328  | 0.81 | 14.1%  |
| Zfp280c | 3.43058   | 0.33 | 9.6%   |
| Zfp281  | 4.616608  | 0.29 | 6.3%   |



|         |            |      |        |
|---------|------------|------|--------|
| Zfp282  | 6.40153    | 0.62 | 9.6%   |
| Zfp286  | 2.781318   | 0.18 | 6.6%   |
| Zfp287  | 2.741526   | 0.17 | 6.4%   |
| Zfp289  | 14.321426  | 3.06 | 21.4%  |
| Zfp292  | 6.34921    | 0.34 | 5.3%   |
| Zfp294  | 10.89696   | 0.29 | 2.7%   |
| Zfp295  | 3.157356   | 0.23 | 7.3%   |
| Zfp296  | 0.03586728 | 0.04 | 100.4% |
| Zfp3    | 3.792406   | 0.22 | 5.8%   |
| Zfp30   | 4.368904   | 0.36 | 8.1%   |
| Zfp300  | 0.76082    | 0.10 | 13.6%  |
| Zfp31   | 0.677464   | 0.08 | 11.9%  |
| Zfp313  | 19.8838    | 0.75 | 3.8%   |
| Zfp316  | 5.410782   | 0.29 | 5.4%   |
| Zfp318  | 21.98542   | 1.11 | 5.1%   |
| Zfp319  | 5.342454   | 0.27 | 5.1%   |
| Zfp322a | 8.691892   | 0.91 | 10.4%  |
| Zfp324  | 3.616236   | 0.25 | 6.9%   |
| Zfp326  | 7.582946   | 0.69 | 9.1%   |
| Zfp329  | 5.153506   | 0.50 | 9.7%   |
| Zfp330  | 1.678694   | 0.34 | 20.5%  |
| Zfp334  | 6.49444    | 0.33 | 5.1%   |
| Zfp335  | 4.62524    | 0.34 | 7.4%   |
| Zfp341  | 1.751052   | 0.14 | 8.0%   |
| Zfp346  | 12.7634    | 1.13 | 8.9%   |
| Zfp35   | 5.682134   | 0.24 | 4.2%   |
| Zfp352  | 0.01422556 | 0.01 | 94.9%  |
| Zfp353  | 0          | 0.00 |        |
| Zfp354a | 1.66397    | 0.07 | 3.9%   |
| Zfp354b | 0.9655984  | 0.05 | 5.5%   |
| Zfp354c | 14.4114    | 0.55 | 3.8%   |
| Zfp358  | 10.85564   | 0.51 | 4.7%   |
| Zfp36   | 0.3288542  | 0.10 | 31.2%  |
| Zfp364  | 24.50072   | 1.61 | 6.6%   |
| Zfp365  | 9.379598   | 0.19 | 2.0%   |
| Zfp366  | 0.00730476 | 0.01 | 147.5% |
| Zfp367  | 4.254292   | 0.64 | 15.0%  |
| Zfp369  | 3.373178   | 0.43 | 12.7%  |
| Zfp36l1 | 7.540344   | 1.17 | 15.5%  |
| Zfp36l2 | 2.113066   | 0.49 | 23.1%  |
| Zfp36l3 | 0.00198053 | 0.00 | 223.6% |
| Zfp37   | 5.442722   | 0.36 | 6.7%   |
| Zfp371  | 0.00252328 | 0.01 | 223.6% |
| Zfp382  | 3.377284   | 0.38 | 11.2%  |
| Zfp384  | 9.235442   | 0.82 | 8.9%   |
| Zfp385  | 26.28148   | 1.33 | 5.0%   |
| Zfp386  | 5.79119    | 0.36 | 6.3%   |

|            |            |      |        |
|------------|------------|------|--------|
| Zfp39      | 1.69041    | 0.13 | 7.8%   |
| Zfp395     | 4.054884   | 0.79 | 19.5%  |
| Zfp397     | 6.751624   | 0.29 | 4.3%   |
| Zfp398     | 3.819456   | 0.37 | 9.8%   |
| Zfp40      | 1.988666   | 0.08 | 4.1%   |
| Zfp407     | 1.92819    | 0.34 | 17.9%  |
| Zfp408     | 3.233878   | 0.33 | 10.3%  |
| Zfp41      | 9.89069    | 0.90 | 9.1%   |
| Zfp410     | 7.108788   | 0.49 | 6.9%   |
| Zfp414     | 9.46115    | 4.39 | 46.4%  |
| Zfp418     | 1.122616   | 0.15 | 13.1%  |
| Zfp42      | 0.01029252 | 0.02 | 147.9% |
| Zfp422     | 9.65042    | 0.39 | 4.0%   |
| Zfp422-rs1 | 4.731816   | 0.18 | 3.8%   |
| Zfp423     | 4.968048   | 0.48 | 9.6%   |
| Zfp426     | 11.1287    | 0.81 | 7.3%   |
| Zfp428     | 17.58168   | 2.22 | 12.6%  |
| Zfp438     | 1.439818   | 0.14 | 9.8%   |
| Zfp444     | 11.99122   | 0.57 | 4.8%   |
| Zfp445     | 43.38588   | 1.88 | 4.3%   |
| Zfp446     | 2.555372   | 0.32 | 12.7%  |
| Zfp449     | 1.653858   | 0.04 | 2.5%   |
| Zfp451     | 10.049516  | 0.76 | 7.6%   |
| Zfp454     | 1.1343946  | 0.24 | 20.9%  |
| Zfp455     | 0.79702    | 0.15 | 18.3%  |
| Zfp456     | 0.2409432  | 0.07 | 28.9%  |
| Zfp457     | 0.7211788  | 0.07 | 9.8%   |
| Zfp458     | 1.697214   | 0.16 | 9.3%   |
| Zfp459     | 0.3121098  | 0.08 | 24.7%  |
| Zfp46      | 8.748536   | 0.56 | 6.4%   |
| Zfp462     | 5.799296   | 0.21 | 3.6%   |
| Zfp467     | 4.40854    | 0.60 | 13.6%  |
| Zfp469     | 12.80972   | 0.93 | 7.2%   |
| Zfp472     | 1.454514   | 0.14 | 9.8%   |
| Zfp473     | 0.2905282  | 0.04 | 12.8%  |
| Zfp474     | 0          | 0.00 |        |
| Zfp488     | 0.06056662 | 0.02 | 30.9%  |
| Zfp496     | 1.0874962  | 0.11 | 9.8%   |
| Zfp498     | 4.487294   | 0.41 | 9.1%   |
| Zfp503     | 5.867904   | 0.41 | 7.0%   |
| zfp507     | 5.31748    | 0.57 | 10.7%  |
| Zfp508     | 5.891204   | 0.20 | 3.5%   |
| Zfp509     | 1.566038   | 0.22 | 14.1%  |
| Zfp51      | 1.238412   | 0.14 | 11.4%  |
| Zfp511     | 5.136274   | 0.55 | 10.7%  |
| Zfp512     | 19.45782   | 0.52 | 2.7%   |
| Zfp513     | 4.818938   | 0.24 | 5.0%   |

|        |           |      |       |
|--------|-----------|------|-------|
| Zfp516 | 2.075326  | 0.25 | 11.8% |
| Zfp518 | 3.259146  | 0.26 | 7.9%  |
| Zfp52  | 0.8265472 | 0.21 | 24.9% |
| Zfp521 | 9.325214  | 0.52 | 5.6%  |
| Zfp523 | 13.60794  | 0.97 | 7.1%  |
| Zfp524 | 1.2982    | 0.12 | 9.3%  |
| Zfp526 | 1.331626  | 0.14 | 10.7% |
| Zfp53  | 1.510832  | 0.28 | 18.3% |
| Zfp532 | 10.82964  | 0.47 | 4.3%  |
| Zfp533 | 4.050588  | 0.21 | 5.1%  |
| Zfp536 | 2.056772  | 0.15 | 7.5%  |
| Zfp54  | 0.4078234 | 0.06 | 14.9% |
| Zfp541 | 0.1953526 | 0.02 | 10.4% |
| Zfp551 | 1.967046  | 0.18 | 9.4%  |
| Zfp553 | 5.184974  | 0.16 | 3.1%  |
| Zfp560 | 0.825885  | 0.05 | 5.9%  |
| Zfp563 | 3.801674  | 0.22 | 5.7%  |
| Zfp566 | 1.278408  | 0.11 | 8.9%  |
| Zfp568 | 0.620601  | 0.03 | 5.1%  |
| Zfp57  | 13.76944  | 1.40 | 10.2% |
| Zfp574 | 7.012842  | 0.41 | 5.9%  |
| Zfp575 | 2.565502  | 0.25 | 9.8%  |
| Zfp579 | 6.892898  | 0.52 | 7.6%  |
| Zfp583 | 2.32743   | 0.32 | 13.9% |
| Zfp59  | 1.645212  | 0.12 | 7.1%  |
| Zfp592 | 5.498548  | 0.30 | 5.5%  |
| Zfp593 | 1.960194  | 0.31 | 15.6% |
| Zfp595 | 0.3412838 | 0.09 | 26.8% |
| Zfp597 | 6.8362    | 0.24 | 3.5%  |
| Zfp598 | 10.174272 | 0.41 | 4.0%  |
| Zfp60  | 10.75114  | 0.22 | 2.0%  |
| Zfp606 | 4.011344  | 0.09 | 2.2%  |
| Zfp607 | 0.431815  | 0.07 | 17.3% |
| Zfp608 | 4.861888  | 0.50 | 10.2% |
| Zfp609 | 5.890834  | 0.31 | 5.3%  |
| Zfp61  | 5.045588  | 0.29 | 5.7%  |
| Zfp612 | 7.385042  | 0.52 | 7.1%  |
| Zfp617 | 3.992188  | 0.29 | 7.2%  |
| Zfp619 | 0.6571188 | 0.06 | 8.5%  |
| Zfp62  | 8.490994  | 0.50 | 5.9%  |
| Zfp622 | 12.71412  | 0.47 | 3.7%  |
| Zfp623 | 5.674464  | 0.26 | 4.5%  |
| Zfp628 | 2.08148   | 0.12 | 5.8%  |
| Zfp629 | 4.800224  | 0.27 | 5.7%  |
| Zfp637 | 11.58682  | 0.73 | 6.3%  |
| Zfp639 | 9.693674  | 0.30 | 3.1%  |
| Zfp64  | 3.998518  | 0.45 | 11.1% |

|           |             |      |        |
|-----------|-------------|------|--------|
| Zfp641    | 2.614922    | 0.12 | 4.8%   |
| Zfp644    | 16.21658    | 0.52 | 3.2%   |
| Zfp646    | 2.490688    | 0.18 | 7.2%   |
| Zfp647    | 2.945368    | 0.24 | 8.0%   |
| Zfp650    | 45.59746    | 2.49 | 5.5%   |
| Zfp652    | 2.87096     | 0.17 | 6.1%   |
| Zfp653    | 2.810756    | 0.17 | 5.9%   |
| Zfp654    | 4.56947     | 0.39 | 8.5%   |
| Zfp655    | 11.58892    | 0.61 | 5.2%   |
| Zfp661    | 1.548574    | 0.17 | 10.8%  |
| Zfp664    | 16.60934    | 0.59 | 3.5%   |
| Zfp667    | 5.48057     | 0.39 | 7.0%   |
| Zfp668    | 3.567136    | 0.21 | 5.8%   |
| Zfp672    | 7.06937     | 0.38 | 5.3%   |
| Zfp677    | 0.3315438   | 0.05 | 15.9%  |
| Zfp68     | 10.201896   | 0.33 | 3.3%   |
| Zfp687    | 6.709142    | 0.60 | 9.0%   |
| Zfp688    | 3.683378    | 0.35 | 9.4%   |
| Zfp689    | 1.954972    | 0.16 | 8.0%   |
| Zfp69     | 0.14039418  | 0.05 | 33.9%  |
| Zfp690    | 1.039868    | 0.15 | 14.6%  |
| Zfp691    | 1.121658    | 0.14 | 12.7%  |
| Zfp692    | 5.19647     | 0.71 | 13.6%  |
| Zfp694    | 0.848442    | 0.17 | 20.0%  |
| Zfp697    | 2.0147054   | 1.26 | 62.3%  |
| Zfp7      | 2.99817     | 0.25 | 8.3%   |
| Zfp704    | 9.51604     | 1.09 | 11.4%  |
| Zfp706    | 61.09968    | 2.77 | 4.5%   |
| Zfp707    | 4.868186    | 0.30 | 6.2%   |
| Zfp708    | 1.521192    | 0.18 | 11.9%  |
| Zfp709    | 0.506598    | 0.06 | 12.0%  |
| Zfp710    | 1.359696    | 0.10 | 7.1%   |
| Zfp711    | 7.56664     | 0.53 | 7.0%   |
| Zfp715    | 7.066276    | 0.18 | 2.5%   |
| Zfp719    | 4.733438    | 0.08 | 1.6%   |
| Zfp71-rs1 | 3.118852    | 0.22 | 7.1%   |
| Zfp72     | 1.936206    | 0.26 | 13.6%  |
| Zfp74     | 6.860994    | 0.56 | 8.2%   |
| Zfp740    | 7.724822    | 1.37 | 17.7%  |
| Zfp748    | 4.35811     | 0.24 | 5.5%   |
| Zfp75     | 6.00795     | 0.40 | 6.6%   |
| Zfp750    | 0.009876726 | 0.01 | 141.3% |
| Zfp758    | 1.1844192   | 0.27 | 22.6%  |
| Zfp759    | 2.84218     | 0.24 | 8.6%   |
| Zfp760    | 1.88456     | 0.10 | 5.1%   |
| Zfp764    | 0.4020886   | 0.11 | 27.2%  |
| Zfp768    | 4.104292    | 0.38 | 9.3%   |

|            |            |      |       |
|------------|------------|------|-------|
| Zfp770     | 8.261104   | 0.31 | 3.7%  |
| Zfp771     | 9.509594   | 0.44 | 4.7%  |
| Zfp775     | 1.763268   | 0.10 | 5.7%  |
| Zfp777     | 8.809316   | 0.28 | 3.2%  |
| Zfp78      | 0.621978   | 0.10 | 16.0% |
| Zfp780b    | 3.915758   | 0.14 | 3.6%  |
| Zfp784     | 1.979068   | 0.15 | 7.7%  |
| Zfp786     | 1.714626   | 0.25 | 14.7% |
| Zfp787     | 6.867686   | 1.09 | 15.9% |
| Zfp790     | 3.97617    | 0.35 | 8.7%  |
| Zfp791     | 1.66323    | 0.15 | 9.2%  |
| Zfp800     | 2.611714   | 0.12 | 4.6%  |
| Zfp804a    | 6.2578     | 0.34 | 5.4%  |
| Zfp809     | 2.25896    | 0.16 | 7.3%  |
| Zfp81      | 4.297206   | 0.44 | 10.3% |
| Zfp810     | 4.138846   | 0.23 | 5.6%  |
| Zfp811     | 5.297918   | 0.26 | 4.9%  |
| Zfp817     | 4.409874   | 1.07 | 24.3% |
| Zfp819     | 0.07396744 | 0.03 | 37.4% |
| Zfp82      | 1.905752   | 0.20 | 10.3% |
| Zfp820     | 0.6255358  | 0.10 | 16.2% |
| Zfp84      | 2.982026   | 0.26 | 8.8%  |
| Zfp85-rs1  | 1.806374   | 0.03 | 1.7%  |
| Zfp87      | 4.646042   | 0.85 | 18.3% |
| Zfp9       | 7.04635    | 0.33 | 4.6%  |
| Zfp90      | 5.688866   | 0.36 | 6.3%  |
| Zfp91      | 28.6459    | 0.69 | 2.4%  |
| Zfp91-cntf | 0.03890324 | 0.02 | 60.3% |
| Zfp92      | 0.1922544  | 0.05 | 27.4% |
| Zfp93      | 1.0629868  | 0.09 | 8.4%  |
| Zfp94      | 2.686428   | 0.28 | 10.4% |
| Zfp97      | 0.5601124  | 0.11 | 19.1% |
| Zfpl1      | 14.12418   | 0.87 | 6.2%  |
| Zfpm1      | 1.674178   | 0.15 | 8.9%  |
| Zfpm2      | 2.000574   | 0.17 | 8.5%  |
| Zfr        | 68.23398   | 2.66 | 3.9%  |
| Zfx        | 3.910486   | 0.20 | 5.0%  |
| Zfy1       | 0          | 0.00 |       |
| Zfy2       | 0          | 0.00 |       |
| Zfyve1     | 10.36144   | 0.65 | 6.3%  |
| Zfyve16    | 3.660004   | 0.30 | 8.2%  |
| Zfyve19    | 5.91229    | 0.22 | 3.7%  |
| Zfyve20    | 10.93076   | 0.42 | 3.8%  |
| Zfyve21    | 2.349456   | 0.29 | 12.5% |
| Zfyve26    | 1.165118   | 0.09 | 7.6%  |
| Zfyve27    | 25.95066   | 1.25 | 4.8%  |
| Zfyve28    | 3.880376   | 0.38 | 9.7%  |

|          |            |      |        |
|----------|------------|------|--------|
| Zfyve9   | 21.2774    | 0.73 | 3.5%   |
| Zgpat    | 8.97328    | 1.18 | 13.1%  |
| Zh2c2    | 1.787034   | 0.27 | 14.9%  |
| Zhx1     | 17.27314   | 0.52 | 3.0%   |
| Zhx2     | 1.598222   | 0.14 | 8.9%   |
| Zhx3     | 5.9729     | 0.60 | 10.0%  |
| Zic1     | 19.01164   | 1.13 | 5.9%   |
| Zic2     | 9.957194   | 0.79 | 7.9%   |
| Zic3     | 2.63624    | 0.16 | 6.1%   |
| Zic4     | 2.429058   | 0.26 | 10.8%  |
| Zic5     | 0.4290284  | 0.09 | 20.5%  |
| Zik1     | 3.788022   | 0.28 | 7.5%   |
| Zim1     | 5.035404   | 0.64 | 12.8%  |
| Zkscan1  | 10.004546  | 0.53 | 5.3%   |
| Zkscan14 | 3.049382   | 0.19 | 6.2%   |
| Zkscan17 | 3.72622    | 0.32 | 8.5%   |
| Zkscan2  | 4.78966    | 0.88 | 18.3%  |
| Zkscan3  | 6.187208   | 0.29 | 4.7%   |
| Zkscan5  | 4.362826   | 0.19 | 4.4%   |
| Zkscan6  | 2.35831    | 0.22 | 9.5%   |
| Zmat1    | 3.090712   | 0.39 | 12.5%  |
| Zmat2    | 30.25222   | 1.45 | 4.8%   |
| Zmat3    | 23.63614   | 1.30 | 5.5%   |
| Zmat4    | 15.76816   | 0.68 | 4.3%   |
| Zmat5    | 6.861024   | 0.54 | 7.9%   |
| Zmiz1    | 33.8755    | 2.42 | 7.1%   |
| Zmiz2    | 42.29112   | 1.77 | 4.2%   |
| Zmpste24 | 10.82434   | 0.53 | 4.9%   |
| Zmym1    | 4.933346   | 0.68 | 13.8%  |
| Zmym2    | 21.40034   | 1.10 | 5.2%   |
| Zmym3    | 29.93224   | 1.57 | 5.3%   |
| Zmym4    | 14.85182   | 0.68 | 4.6%   |
| Zmym5    | 3.890438   | 0.32 | 8.2%   |
| Zmym6    | 11.31141   | 1.36 | 12.1%  |
| Zmynd10  | 0.4386646  | 0.09 | 20.0%  |
| Zmynd11  | 29.70556   | 1.00 | 3.4%   |
| Zmynd12  | 0.01723966 | 0.03 | 148.8% |
| Zmynd15  | 0.11582966 | 0.05 | 39.7%  |
| Zmynd17  | 0.2149692  | 0.04 | 18.8%  |
| Zmynd19  | 8.731896   | 0.78 | 8.9%   |
| Znf202   | 0.3279974  | 0.08 | 25.0%  |
| Znf230   | 0.3272478  | 0.16 | 49.1%  |
| Znf326   | 0.7901234  | 0.20 | 25.4%  |
| Znf509   | 0.6647238  | 0.28 | 42.3%  |
| Znf580   | 12.8221    | 1.40 | 10.9%  |
| Znf638   | 0.1468696  | 0.04 | 30.5%  |
| Znf710   | 0.21951564 | 0.10 | 47.1%  |

|         |             |       |        |
|---------|-------------|-------|--------|
| Znf740  | 10.950618   | 0.72  | 6.6%   |
| Znf746  | 4.609238    | 0.20  | 4.3%   |
| Znfx1   | 3.84209     | 0.10  | 2.7%   |
| Znhit1  | 15.90398    | 2.04  | 12.8%  |
| Znhit2  | 10.25616    | 0.16  | 1.5%   |
| Znhit3  | 12.32126    | 1.16  | 9.4%   |
| Znhit4  | 2.720978    | 0.43  | 15.7%  |
| Znrd1   | 6.85102     | 0.33  | 4.8%   |
| Znrf1   | 41.75052    | 1.27  | 3.1%   |
| Znrf2   | 8.442826    | 0.27  | 3.2%   |
| Znrf3   | 1.426574    | 0.18  | 12.9%  |
| Znrf4   | 0           | 0.00  |        |
| Zp1     | 0.0188818   | 0.01  | 79.1%  |
| Zp2     | 0           | 0.00  |        |
| Zp3     | 0.0104756   | 0.01  | 137.0% |
| Zp3r    | 0.0033345   | 0.01  | 223.6% |
| Zppb    | 1.793766    | 0.11  | 6.4%   |
| Zppb2   | 0.01991136  | 0.03  | 140.4% |
| Zpld1   | 0.00317678  | 0.01  | 223.6% |
| Zranb1  | 14.38014    | 0.68  | 4.7%   |
| Zranb2  | 57.40644    | 2.39  | 4.2%   |
| Zranb3  | 1.569524    | 0.12  | 7.6%   |
| Zrsr1   | 55.2912     | 0.84  | 1.5%   |
| Zrsr2   | 15.1627     | 1.31  | 8.6%   |
| Zscan10 | 0.009655736 | 0.01  | 139.6% |
| Zscan12 | 1.0673146   | 0.13  | 12.6%  |
| Zscan2  | 2.032908    | 0.13  | 6.6%   |
| Zscan20 | 0.4261876   | 0.11  | 25.3%  |
| Zscan21 | 6.6236      | 0.64  | 9.7%   |
| Zscan22 | 2.184076    | 0.27  | 12.6%  |
| Zscan4d | 0           | 0.00  |        |
| Zswim1  | 8.102348    | 0.33  | 4.1%   |
| Zswim2  | 0           | 0.00  |        |
| Zswim3  | 3.287936    | 0.12  | 3.6%   |
| Zswim4  | 2.279206    | 0.23  | 10.1%  |
| Zswim5  | 2.88471     | 0.17  | 5.9%   |
| Zswim6  | 9.23641     | 0.66  | 7.1%   |
| Zubr1   | 5.441846    | 1.21  | 22.2%  |
| Zw10    | 5.560698    | 0.24  | 4.4%   |
| Zwilch  | 0.9292998   | 0.14  | 15.1%  |
| Zwint   | 542.0876    | 14.71 | 2.7%   |
| Zxdb    | 2.122398    | 0.14  | 6.5%   |
| Zxdc    | 5.44624     | 0.18  | 3.3%   |
| Zyg11a  | 0.00772498  | 0.01  | 138.7% |
| Zyg11b  | 83.13448    | 6.20  | 7.5%   |
| Zyx     | 19.48082    | 1.17  | 6.0%   |
| Zzef1   | 7.287726    | 0.62  | 8.4%   |

|      |          |      |       |
|------|----------|------|-------|
| Zzz3 | 5.642644 | 0.59 | 10.4% |
|------|----------|------|-------|
