# Supplementary material for: High yield derivation of enriched glutamatergic neurons from suspension-cultured mouse ESCs for neurotoxicology research
Source: PubMed Central journal article supplement (PMC3573964; doi:10.1186/1471-2202-13-127), 2012-10-24
Supplement: 1471-2202-13-127-S2.pdf [file 1471-2202-13-127-S2.pdf]

| Functional category      | Function                     | Symbol     | Average RKPM                              | Common Gene Name                     |
|--------------------------|------------------------------|------------|-------------------------------------------|--------------------------------------|
| Neuronal Subtype Markers | Glutamatergic                | Slc17a7    | 0.133                                     | vGluT1                               |
|                          |                              | Slc17a6    | 100.80                                    | vGluT2                               |
|                          |                              | Slc17a8    | 0.12                                      | vGluT3                               |
|                          |                              | Slc17a5    | 4.32                                      | Sialin                               |
|                          | GABAergic                    | Gad1       | 10.03                                     | Glutamate decarboxylase 1            |
|                          |                              | Gad2       | 13.88                                     | Glutamate decarboxylase 2            |
|                          |                              | Slc32a1    | 11.57                                     | vGAT                                 |
|                          | Dopaminergic                 | Th         | 0.007                                     | Tyrosine hydroxylase                 |
|                          | Cholinergic and motor neuron | vAChT      | 0.11                                      | Vesicular ACh Transferase            |
|                          |                              | ChAT       | 0.07                                      | Choline acetyltransferase            |
|                          |                              | Mnx1       | 0.302                                     | Motor neuron and pancreas homeobox 1 |
|                          |                              | Isl1       | 0.354                                     | LIM homeobox 1                       |
|                          | Serotonergic                 | Slc6a4     | 0.01                                      | Serotonin transporter                |
|                          |                              | Tph1       | ND                                        | tryptophan hydroxylase 1             |
| Tph2                     |                              | 0.03       | tryptophan hydroxylase 2                  |                                      |
| Glutamate                | Gria1                        | 30.35608   | Glutamate receptor, ionotropic, AMPA 1    |                                      |
|                          | Gria2                        | 60.77608   | Glutamate receptor, ionotropic, AMPA 2    |                                      |
|                          | Gria3                        | 19.70934   | Glutamate receptor, ionotropic, AMPA 3    |                                      |
|                          | Gria4                        | 67.54714   | Glutamate receptor, ionotropic, AMPA 4    |                                      |
|                          | Grik1                        | 5.235484   | Glutamate receptor, ionotropic, Kainate 1 |                                      |
|                          | Grik2                        | 9.172482   | Glutamate receptor, ionotropic, Kainate 2 |                                      |
|                          | Grik3                        | 9.686086   | Glutamate receptor, ionotropic, Kainate 3 |                                      |
|                          | Grik4                        | 6.51067    | Glutamate receptor, ionotropic, Kainate 4 |                                      |
|                          | Grik5                        | 33.36404   | Glutamate receptor, ionotropic, Kainate 5 |                                      |
|                          | Grin1                        | 122.381    | Glutamate receptor, ionotropic, NMDA 1    |                                      |
|                          | Grin2a                       | 2.127506   | Glutamate receptor, ionotropic, NMDA 2A   |                                      |
|                          | Grin2b                       | 2.3164     | Glutamate receptor, ionotropic, NMDA 2B   |                                      |
|                          | Grin2c                       | 0.04316324 | Glutamate receptor, ionotropic, NMDA 2C   |                                      |
|                          | Grin2d                       | 7.605112   | Glutamate receptor, ionotropic, NMDA 2D   |                                      |
|                          | Grin3a                       | 7.380222   | Glutamate receptor, ionotropic, NMDA 3A   |                                      |
|                          | Grin3b                       | 0.6538906  | Glutamate receptor, ionotropic, NMDA 3B   |                                      |

|          |          |                                                      |                                                           |
|----------|----------|------------------------------------------------------|-----------------------------------------------------------|
|          | Grm1     | 2.443274                                             | Glutamate receptor, metabotropic 1                        |
|          | Grm2     | 0.3390048                                            | Glutamate receptor, metabotropic 2                        |
|          | Grm3     | 4.035222                                             | Glutamate receptor, metabotropic 3                        |
|          | Grm4     | 9.94198                                              | Glutamate receptor, metabotropic 4                        |
|          | Grm5     | 16.30998                                             | Glutamate receptor, metabotropic 5                        |
|          | Grm6     | ND                                                   | Glutamate receptor, metabotropic 6                        |
|          | Grm7     | 18.03178                                             | Glutamate receptor, metabotropic 7                        |
|          | Grm8     | 3.685954                                             | Glutamate receptor, metabotropic 8                        |
|          | Grina    | 267.7604                                             | Glutamate receptor, ionotropic, NMDA-associated protein 1 |
| GABA     | Gabra1   | 9.01074                                              | Gamma-aminobutyric acid (GABA) A receptor, $\alpha$ 1     |
|          | Gabra2   | 28.22418                                             | Gamma-aminobutyric acid (GABA) A receptor, $\alpha$ 2     |
|          | Gabra3   | 26.0508                                              | Gamma-aminobutyric acid (GABA) A receptor, $\alpha$ 3     |
|          | Gabra4   | 5.83007                                              | Gamma-aminobutyric acid (GABA) A receptor, $\alpha$ 4     |
|          | Gabra5   | 28.9894                                              | Gamma-aminobutyric acid (GABA) A receptor, $\alpha$ 5     |
|          | Gabra6   | ND                                                   | Gamma-aminobutyric acid (GABA) A receptor, $\alpha$ 6     |
|          | Gabrb1   | 3.906874                                             | Gamma-aminobutyric acid (GABA) A receptor, $\beta$ 1      |
|          | Gabrb2   | 13.46166                                             | Gamma-aminobutyric acid (GABA) A receptor, $\beta$ 2      |
| Gabrb3   | 56.24872 | Gamma-aminobutyric acid (GABA) A receptor, $\beta$ 3 |                                                           |
| Glycine  | Gla1     | 12.848712                                            | Glycine receptor, $\alpha$ 1                              |
|          | Gla2     | 8.761032                                             | Glycine receptor, $\alpha$ 2                              |
|          | Gla3     | 5.173716                                             | Glycine receptor, $\alpha$ 3                              |
|          | Gla4     | 0.00837082                                           | Glycine receptor, $\alpha$ 4                              |
|          | GlrB     | 108.062                                              | Glycine receptor, $\beta$                                 |
| Dopamine | Drd1a    | 0.07373384                                           | Dopamine receptor D1                                      |
|          | Drd2     | 7.23483                                              | Dopamine receptor D2                                      |
|          | Drd3     | 0.00864052                                           | Dopamine receptor D3                                      |
|          | Drd4     | 0.07192894                                           | Dopamine receptor D4                                      |
|          | Drd5     | 0.496315                                             | Dopamine receptor D5                                      |
|          | Chrna1   | 0.0070755                                            | Cholinergic receptor, nicotinic, $\alpha$ 1               |
|          | Chrna2   | 0.02744146                                           | Cholinergic receptor, nicotinic, $\alpha$ 2               |
|          | Chrna3   | 0.275886                                             | Cholinergic receptor, nicotinic, $\alpha$ 3               |
|          | Chrna4   | 20.67094                                             | Cholinergic receptor, nicotinic, $\alpha$ 4               |
|          | Chrna5   | 0.3836258                                            | Cholinergic receptor, nicotinic, $\alpha$ 5               |
|          | Chrna6   | 0.01037758                                           | Cholinergic receptor, nicotinic, $\alpha$ 6               |

## Receptors

|               |          |                         |                                              |
|---------------|----------|-------------------------|----------------------------------------------|
| Acetylcholine | Chrna7   | 8.656464                | Cholinergic receptor, nicotinic, $\alpha$ 7  |
|               | Chrna9   | ND                      | Cholinergic receptor, nicotinic, $\alpha$ 9  |
|               | Chrna10  | 0.000107139             | Cholinergic receptor, nicotinic, $\alpha$ 10 |
|               | Chrnb1   | 0.4118318               | Cholinergic receptor, nicotinic, $\beta$ 1   |
|               | Chrnb2   | 20.07258                | Cholinergic receptor, nicotinic, $\beta$ 2   |
|               | Chrnb3   | 0.005663962             | Cholinergic receptor, nicotinic, $\beta$ 3   |
|               | Chrnb4   | 0.161446                | Cholinergic receptor, nicotinic, $\beta$ 4   |
|               | Chrnd    | ND                      | Cholinergic receptor, nicotinic, $\delta$    |
|               | Chrne    | ND                      | Cholinergic receptor, nicotinic, $\epsilon$  |
|               | Chrng    | ND                      | Cholinergic receptor, nicotinic, $\gamma$    |
|               | Chrm1    | 0.0064537               | Cholinergic receptor, muscarinic 1           |
|               | Chrm2    | 18.50262                | Cholinergic receptor, muscarinic 2           |
|               | Chrm3    | 8.73957                 | Cholinergic receptor, muscarinic 3           |
|               | Chrm4    | 2.234862                | Cholinergic receptor, muscarinic 4           |
|               | Chrm5    | 0.06815074              | Cholinergic receptor, muscarinic 5           |
| Serotonin     | Htr1a    | 4.405996                | 5-HT <sub>1A</sub> receptor                  |
|               | Htr1b    | 3.4554418               | 5-HT <sub>1B</sub> receptor                  |
|               | Htr1d    | 0.2505624               | 5-HT <sub>1D</sub> receptor                  |
|               | Htr1f    | 0.03416864              | 5-HT <sub>1F</sub> receptor                  |
|               | Htr2a    | 6.485528                | 5-HT <sub>2A</sub> receptor                  |
|               | Htr2b    | 0.01619778              | 5-HT <sub>2B</sub> receptor                  |
|               | Htr2c    | 46.51112                | 5-HT <sub>2C</sub> receptor                  |
|               | Htr3a    | 0.07764886              | 5-HT <sub>3A</sub> receptor                  |
|               | Htr3b    | 0.02939726              | 5-HT <sub>3B</sub> receptor                  |
|               | Htr4     | 1.772444                | 5-HT <sub>4</sub> receptor                   |
|               | Htr5a    | 0.7344406               | 5-HT <sub>5A</sub> receptor                  |
|               | Htr5b    | 0.05585322              | 5-HT <sub>5B</sub> receptor                  |
|               | Htr6     | 0.7168226               | 5-HT <sub>6</sub> receptor                   |
|               | Htr7     | 13.4136                 | 5-HT <sub>7</sub> receptor                   |
| Sstr1         | 14.12698 | Somatostatin receptor 1 |                                              |
| Sstr1         | 14.12698 | Somatostatin receptor 1 |                                              |

|                                  |         |                                              |                                                                                |
|----------------------------------|---------|----------------------------------------------|--------------------------------------------------------------------------------|
| Miscellaneous receptors          | Sstr2   | 2.919584                                     | Somatostatin receptor 2                                                        |
|                                  | Sstr3   | 0.373493                                     | Somatostatin receptor 3                                                        |
|                                  | Sstr4   | 0.6302732                                    | Somatostatin receptor 4                                                        |
|                                  | Sstr5   | 0.00477514                                   | Somatostatin receptor 5                                                        |
|                                  | Brs3    | 0.00584498                                   | Bombesin-like receptor 3                                                       |
|                                  | Galr1   | 0.5353272                                    | Galanin receptor 1                                                             |
|                                  | Galr2   | 0.4362224                                    | Galanin receptor 2                                                             |
|                                  | Galr3   | 2.3909507                                    | Galanin receptor 3                                                             |
|                                  | Nmbr    | 1.26173                                      | Neuromedin B receptor                                                          |
|                                  | Nmur1   | 0.12054478                                   | Neuromedin U receptor 1                                                        |
|                                  | Nmur2   | 0.2864554                                    | Neuromedin U receptor 2                                                        |
|                                  | Adra1a  | 2.282118                                     | $\alpha$ -1A adrenergic receptor                                               |
|                                  | Adra1b  | 10.276112                                    | $\alpha$ -1B adrenergic receptor                                               |
|                                  | Adra1d  | 0.8868502                                    | $\alpha$ -1D adrenergic receptor                                               |
|                                  | Adra2a  | 17.66096                                     | $\alpha$ -2A adrenergic receptor                                               |
|                                  | Adra2b  | 0.007961938                                  | $\alpha$ -2B adrenergic receptor                                               |
|                                  | Adra2c  | 0.7679106                                    | $\alpha$ -2C adrenergic receptor                                               |
|                                  | Adrb1   | 1.9138                                       | $\beta$ -1 adrenergic receptor                                                 |
|                                  | Adrb2   | 0.1401438                                    | $\beta$ -2 adrenergic receptor                                                 |
|                                  | Adrb3   | 0.4855288                                    | $\beta$ -3 adrenergic receptor                                                 |
|                                  | Tacr1   | 8.85355                                      | Tachykinin receptor 1                                                          |
|                                  | Tacr2   | ND                                           | Tachykinin receptor 2                                                          |
|                                  | Tacr3   | 3.022146                                     | Tachykinin receptor 3                                                          |
| PTPRS                            | 68.4817 | Receptor-type tyrosine-protein phosphatase S |                                                                                |
| Voltage-gated potassium channels | Kcna1   | 12.545514                                    | Shaker-related, member 1                                                       |
|                                  | Kcna2   | 11.830216                                    | Shaker-related, member 2                                                       |
|                                  | Kcna6   | 17.83032                                     | Shaker-related, member 6                                                       |
|                                  | Kcnab2  | 45.5189                                      | Shaker-related, $\beta$ member 2                                               |
|                                  | Kcnc1   | 27.47524                                     | Shaw-related, member 1                                                         |
|                                  | Kcnc3   | 16.22718                                     | Shaw-related, member 3                                                         |
|                                  | Kcnc4   | 14.66868                                     | Shaw-related, member 4                                                         |
|                                  | Kcnd2   | 24.68834                                     | Shal-related, member 2                                                         |
|                                  | Kcnh2   | 20.17306                                     | hERG-related, member 1                                                         |
|                                  | Kcnma1  | 10.95116                                     | Large conductance $\text{Ca}^{2+}$ -activated channel, subfamily M, $\alpha$ 1 |

## Voltage-gated Ion Channels

|                                    |            |                                       |                                        |
|------------------------------------|------------|---------------------------------------|----------------------------------------|
| Voltage-dependent calcium channels | Cacna1a    | 18.84142                              | L-type $\alpha_1$ subunit              |
|                                    | Cacna1b    | 10.296098                             | N-type $\alpha_1$ subunit              |
|                                    | Cacna2d1   | 16.37378                              | $\alpha_2\delta$ Subunit               |
|                                    | Cacna2d2   | 18.70052                              | $\alpha_2\delta$ Subunit               |
|                                    | Cacnb1     | 15.89976                              | L-type $\beta_1$ subunit               |
|                                    | Cacnb2     | 2.56098                               | L-type $\beta_2$ subunit               |
|                                    | Cacnb3     | 15.69302                              | L-type $\beta_3$ subunit               |
|                                    | Cacnb4     | 15.19204                              | L-type $\beta_4$ subunit               |
|                                    | Cacng2     | 25.98072                              | $\gamma_2$ subunit                     |
|                                    | Cacng3     | 18.64872                              | $\gamma_3$ subunit                     |
|                                    | Cacng4     | 16.44202                              | $\gamma_4$ subunit                     |
| Cacng7                             | 55.51874   | $\gamma_7$ subunit                    |                                        |
| Voltage-gated sodium channels      | Scn1a      | 29.7139                               | Type I, $\alpha$ subunit               |
|                                    | Scn1b      | 86.58392                              | Type I, $\beta$ subunit                |
|                                    | Scn2a1     | 24.8485                               | Type II, $\alpha$ subunit              |
|                                    | Scn2b      | 60.75688                              | Type II, $\beta$ subunit               |
|                                    | Scn3a      | 10.857716                             | Type III, $\alpha$ subunit             |
|                                    | Scn3b      | 36.61484                              | Type III, $\beta$ subunit              |
|                                    | Scn8a      | 33.37398                              | Type VIII, $\alpha$ subunit            |
| Voltage-gated chloride channels    | Clcn1      | 0.1915332                             | voltage-dependent chloride channel 1   |
|                                    | Clcn2      | 7.257858                              | voltage-dependent chloride channel 2   |
|                                    | Clcn3      | 52.63078                              | voltage-dependent chloride channel 3   |
|                                    | Clcn4-2    | 48.52664                              | voltage-dependent chloride channel 4-2 |
|                                    | Clcn5      | 17.83006                              | voltage-dependent chloride channel 5   |
|                                    | Clcn6      | 31.50824                              | voltage-dependent chloride channel 6   |
|                                    | Clcn7      | 14.04322                              | voltage-dependent chloride channel 7   |
|                                    | Clcnka     | ND                                    | voltage-dependent chloride channel Ka  |
| Clcnkb                             | 0.01282394 | voltage-dependent chloride channel Kb |                                        |
|                                    | Syp        | 413.217                               | Synaptophysin                          |
|                                    | Sv2a       | 145.4704                              | Synaptic vesicle glycoprotein 2A       |
|                                    | Sv2b       | 14.71162                              | Synaptic vesicle glycoprotein 2B       |
|                                    | Sv2c       | 24.58828                              | Synaptic vesicle glycoprotein 2C       |
|                                    | Synpr      | 16.04598                              | Synaptoporin                           |

Synapse

|                                           |          |           |                                               |
|-------------------------------------------|----------|-----------|-----------------------------------------------|
| Presynaptic vesicle-associated            | Cplx1    | 327.2848  | Complexin 1                                   |
|                                           | Stx1b2   | 137.9928  | Syntaxin 1B                                   |
|                                           | Stxbp1   | 368.7822  | Syntaxin binding protein                      |
|                                           | Syt1     | 122.8554  | Synaptotagmin 1                               |
|                                           | Syng1    | 150.5436  | Synaptogyrin 1                                |
|                                           | Syng3    | 128.5664  | Synaptogyrin 3                                |
|                                           | Stxbp1   | 368.7822  | Munc18                                        |
|                                           | Vamp2    | 465.013   | Vesicle-associated membrane protein 2         |
|                                           | Snap25   | 706.9992  | Synaptosomal-associated protein 25            |
|                                           | Syn1     | 140.7648  | Synapsin 1                                    |
|                                           | Syn2     | 109.52746 | Synapsin 2                                    |
| Presynaptic active zone                   | Pclo     | 9.378232  | Piccolo                                       |
|                                           | Bsn      | 7.846538  | Bassoon                                       |
|                                           | Cask     | 52.78174  | CASK                                          |
|                                           | Caskin1  | 41.54494  | CASKIN                                        |
|                                           | Erc1     | 16.55554  | ERC 1                                         |
|                                           | Erc2     | 16.87308  | ERC 2                                         |
|                                           | Ctbp2    | 9.589376  | Ribeye                                        |
| Presynaptic clathrin-mediated endocytosis | Clta     | 110.5168  | Clathrin A                                    |
|                                           | Cltb     | 82.91766  | Clathrin B                                    |
|                                           | Cltc     | 159.5734  | Clathrin C                                    |
|                                           | Synj1    | 48.23858  | Synaptojanin 1                                |
|                                           | Sh3gl2   | 82.0416   | Endophilin A1                                 |
|                                           | Ap2a1    | 89.73118  | Adaptor-related protein complex 2, $\alpha$ 1 |
|                                           | Ap2a2    | 54.65592  | Adaptor-related protein complex 2, $\alpha$ 2 |
|                                           | Ap2b1    | 80.57466  | Adaptor-related protein complex 2, $\mu$ 1    |
|                                           | Ap2m1    | 16.8416   | Adaptor-related protein complex 2, $\sigma$ 1 |
|                                           | Scamp1   | 91.38928  | Secretory carrier membrane protein 1          |
|                                           | Scamp2   | 4.392658  | Secretory carrier membrane protein 2          |
|                                           | Scamp3   | 37.45006  | Secretory carrier membrane protein 3          |
|                                           | Scamp4   | 11.8911   | Secretory carrier membrane protein 4          |
|                                           | Scamp5   | 94.34392  | Secretory carrier membrane protein 5          |
| Ap2s1                                     | 63.71916 | Dynamin   |                                               |
| Dlg2                                      | 34.96596 | PSD-93    |                                               |

|               |                           |          |           |                                                            |
|---------------|---------------------------|----------|-----------|------------------------------------------------------------|
|               | Postsynaptic              | Dlg4     | 80.0291   | PSD-95                                                     |
|               |                           | Shank2   | 5.891272  | SH3 and multiple ankyrin repeat domains 2                  |
|               |                           | Shank3   | 17.05286  | SH3 and multiple ankyrin repeat domains 3                  |
|               |                           | Gphn     | 42.36262  | Gephyrin                                                   |
| Cytoskeletal  | Structural                | Mapt     | 124.2266  | Tau                                                        |
|               |                           | Tubb3    | 404.603   | $\beta$ -III tubulin                                       |
|               |                           | Stmn2    | 398.1574  | Stathmin-like 2                                            |
|               |                           | Stmn3    | 453.6074  | Stathmin-like 3                                            |
|               |                           | Rtn1     | 615.747   | Reticulon 1                                                |
|               |                           | Rtn3     | 864.7276  | Reticulon 3                                                |
|               |                           | Nefh     | 79.42608  | Neurofilament H                                            |
|               |                           | Nefl     | 765.079   | Neurofilament L                                            |
|               |                           | Nefm     | 10.044324 | Neurofilament M                                            |
|               |                           | Ina      | 129.8978  | $\alpha$ -internexin                                       |
|               |                           | Mtap2    | 176.8036  | MAP2                                                       |
| Metabolic     | Sodium/potassium pumps    | Atp1a3   | 974.394   | Sodium/Potassium pump ( $\alpha$ subunit)                  |
|               |                           | Atp1b1   | 681.843   | Sodium/Potassium pump ( $\beta$ subunit)                   |
|               | Calcium response pathways | Ncdn     | 171.9668  | Neurochondrin                                              |
|               |                           | Camk2b   | 107.09824 | Calcium/calmodulin-dependent protein kinase 2B             |
|               |                           | Camk2d   | 81.81252  | Calcium/calmodulin-dependent protein kinase 2D             |
|               |                           | Camk2g   | 73.6673   | Calcium/calmodulin-dependent protein kinase 2G             |
|               |                           | Camk2n1  | 54.82786  | Calcium/calmodulin-dependent protein kinase II inhibitor 1 |
|               |                           | Camk2n2  | 117.5138  | Calcium/calmodulin-dependent protein kinase II inhibitor 2 |
| mRNA splicing | R3hdm2                    | 23.95266 | NeuN      |                                                            |
| Molecules     | Synaptogenesis            | Ncam1    | 116.4502  | Neural cell adhesion molecule 1                            |
|               |                           | Lphn1    | 65.3427   | Latrophilin 1                                              |
|               |                           | Lphn2    | 24.9546   | Latrophilin 2                                              |
|               |                           | Lphn3    | 37.94026  | Latrophilin 3                                              |
|               |                           | Ncam2    | 33.11438  | Neural cell adhesion molecule 2                            |
|               |                           | Cdh2     | 24.54784  | N-cadherin                                                 |
|               |                           | Nlgn1    | 13.44976  | Neuroigin 1                                                |
|               |                           | Nlgn2    | 69.38652  | Neuroigin 2                                                |
|               |                           | Nlgn3    | 18.3061   | Neuroigin 3                                                |
|               |                           | Nrxn1    | 44.7362   | Neurexin 1                                                 |

|            |                  |         |          |                                                    |
|------------|------------------|---------|----------|----------------------------------------------------|
| Adhesion M |                  | Nrxn2   | 111.0678 | Neurexin 2                                         |
|            |                  | Nrxn3   | 21.71548 | Neurexin 3                                         |
|            | Neurite guidance | Cntn1   | 138.7748 | Contactin 1                                        |
|            |                  | Cntn2   | 9.052066 | Contactin 2                                        |
|            |                  | Cntn4   | 12.34568 | Contactin 4                                        |
|            |                  | Cntnap1 | 73.47142 | Contactin-associated protein 1                     |
|            |                  | Cntnap2 | 25.50548 | Contactin-associated protein 2                     |
|            |                  | Gprin1  | 20.1613  | G protein regulated inducer of neurite outgrowth 1 |
|            |                  | Gap43   | 299.2398 | Growth associated protein 43                       |
|            |                  | Reln    | 41.66184 | Reelin                                             |
|            |                  | Pou3f3  | 8.4521   | POU class 3 homeobox 31                            |
